# Supplementary material for: Changes in Antigen-Reactive Antibody Level at Various Time Spans after COVID-19 Vaccination Using Machine Learning
Source: Preprints.org preprint supplement (doi:10.20944/preprints202304.1091.v1), 2023-04-28
Supplement: Supplementary file 1 [file supplementary]

**Table S5.** Classification rules generated by the optimal DT classifiers on different feature lists.

(1) Rules on the LASSO feature list

|                                                         |                                                     |
|---------------------------------------------------------|-----------------------------------------------------|
| Rules_0                                                 | passed counts:247                                   |
| node_0: feature_name=HuIgG_0.03                         | feature_id[44].value <= threshold=3298.333251953125 |
| node_1: feature_name=SARS.CoV.2.S1.mFcTag               | feature_id[0].value > threshold=5354.388916015625   |
| node_9: feature_name=HuIgM_0.03                         | feature_id[45].value > threshold=-80.66666793823242 |
| node_27: feature_name=HuIgM_0.03                        | feature_id[45].value <= threshold=61.33333206176758 |
| node_28: feature_name=a-HuIgG_0.30                      | feature_id[30].value <= threshold=34878.66796875    |
| node_29: feature_name=HuIgG_0.03                        | feature_id[44].value > threshold=769.8333435058594  |
| node_35: feature_name=SARS.CoV.S1.HisTag                | feature_id[14].value > threshold=400.3000030517578  |
| node_39: feature_name=hCoV.HKU1.S1_S2                   | feature_id[22].value <= threshold=42662.666015625   |
| node_40: feature_name=Flu.B_Phu/.HA1                    | feature_id[11].value <= threshold=49118.416015625   |
| node_41: feature_name=hCoV.OC43.HE                      | feature_id[10].value <= threshold=25184.06640625    |
| node_42: feature_name=HuIgM_0.30                        | feature_id[13].value <= threshold=1223.5            |
| node_43: feature_name=a-HuIgA_0.03                      | feature_id[29].value > threshold=-59.66666603088379 |
| node_47: feature_name=SARS.CoV.S1.HisTag                | feature_id[14].value <= threshold=25028.0           |
| node_48: feature_name=HuIgM_0.03                        | feature_id[45].value <= threshold=35.33333206176758 |
| Class: healthcare workers 60–180 days after vaccination |                                                     |
| Rules_1                                                 | passed counts:77                                    |
| node_0: feature_name=HuIgG_0.03                         | feature_id[44].value > threshold=3298.333251953125  |
| node_78: feature_name=a-HuIgG_0.03                      | feature_id[1].value <= threshold=19665.666015625    |
| node_79: feature_name=SARS.CoV.2.S1.mFcTag              | feature_id[0].value <= threshold=54010.166015625    |
| node_80: feature_name=SARS.CoV.2.S1+S2                  | feature_id[18].value > threshold=48317.708984375    |

|                                                            |                                                      |
|------------------------------------------------------------|------------------------------------------------------|
| node_224: feature_name=a-MoIgG_0.10                        | feature_id[38].value > threshold=2066.8333129882812  |
| node_226: feature_name=HuIgM_0.30                          | feature_id[13].value <= threshold=750.1666870117188  |
| node_227: feature_name=SARS.CoV.S1.RBD.HisTag              | feature_id[20].value > threshold=7585.25             |
| node_233: feature_name=SARS.CoV.2.S1.HisTag                | feature_id[16].value > threshold=29169.625           |
| node_235: feature_name=a-MoIgA_0.03                        | feature_id[37].value > threshold=-137.16666412353516 |
| Class: healthcare workers within 60 days after vaccination |                                                      |
|                                                            |                                                      |
| Rules_2                                                    | passed counts:74                                     |
| node_0: feature_name=HuIgG_0.03                            | feature_id[44].value <= threshold=3298.333251953125  |
| node_1: feature_name=SARS.CoV.2.S1.mFcTag                  | feature_id[0].value <= threshold=5354.388916015625   |
| node_2: feature_name=SARS.CoV.2.S1.HisTag                  | feature_id[16].value > threshold=-383.86944580078125 |
| node_4: feature_name=hCoV.OC43.HE                          | feature_id[10].value > threshold=414.5370330810547   |
| Class: unvaccinated healthcare workers                     |                                                      |
|                                                            |                                                      |
| Rules_3                                                    | passed counts:59                                     |
| node_0: feature_name=HuIgG_0.03                            | feature_id[44].value > threshold=3298.333251953125   |
| node_78: feature_name=a-HuIgG_0.03                         | feature_id[1].value <= threshold=19665.666015625     |
| node_79: feature_name=SARS.CoV.2.S1.mFcTag                 | feature_id[0].value <= threshold=54010.166015625     |
| node_80: feature_name=SARS.CoV.2.S1+S2                     | feature_id[18].value > threshold=48317.708984375     |
| node_224: feature_name=a-MoIgG_0.10                        | feature_id[38].value > threshold=2066.8333129882812  |
| node_226: feature_name=HuIgM_0.30                          | feature_id[13].value > threshold=750.1666870117188   |
| node_238: feature_name=HuIgM_0.30                          | feature_id[13].value > threshold=760.3333435058594   |
| node_240: feature_name=hCoV.OC43.HE                        | feature_id[10].value > threshold=3879.75             |
| node_246: feature_name=a-HuIgA_0.30                        | feature_id[27].value > threshold=1379.8333740234375  |
| node_248: feature_name=Flu.H1N1.HA1                        | feature_id[26].value <= threshold=53891.083984375    |

|                                                            |                                                      |
|------------------------------------------------------------|------------------------------------------------------|
| node_249: feature_name=MERS.CoV.S1.RBD.367.606.rFcTag      | feature_id[3].value > threshold=1486.7666625976562   |
| node_253: feature_name=HuIgM_0.03                          | feature_id[45].value > threshold=-56.33333396911621  |
| node_279: feature_name=hCoV.229E.S1                        | feature_id[2].value <= threshold=51743.583984375     |
| node_280: feature_name=Flu.B_Mal/.HA1                      | feature_id[4].value <= threshold=48206.833984375     |
| node_281: feature_name=a-MoIgM_0.10                        | feature_id[40].value > threshold=989.5000305175781   |
| node_285: feature_name=HuIgM_0.30                          | feature_id[13].value <= threshold=2008.3333129882812 |
| Class: healthcare workers within 60 days after vaccination |                                                      |
|                                                            |                                                      |
| Rules_4                                                    | passed counts:41                                     |
| node_0: feature_name=HuIgG_0.03                            | feature_id[44].value > threshold=3298.333251953125   |
| node_78: feature_name=a-HuIgG_0.03                         | feature_id[1].value <= threshold=19665.666015625     |
| node_79: feature_name=SARS.CoV.2.S1.mFcTag                 | feature_id[0].value <= threshold=54010.166015625     |
| node_80: feature_name=SARS.CoV.2.S1+S2                     | feature_id[18].value <= threshold=48317.708984375    |
| node_81: feature_name=SARS.CoV.2.Spike.RBD.His.Bac         | feature_id[9].value > threshold=16347.4580078125     |
| node_111: feature_name=hCoV.NL63.S1                        | feature_id[5].value <= threshold=4866.533447265625   |
| node_112: feature_name=SARS.CoV.2.S1.mFcTag                | feature_id[0].value > threshold=40690.80078125       |
| node_116: feature_name=a-MoIgG_0.10                        | feature_id[38].value > threshold=2424.6666259765625  |
| node_118: feature_name=DcCoV.HKU23.NP                      | feature_id[21].value > threshold=3458.25             |
| node_120: feature_name=hCoV.OC43.S1_S2ECD.HisTag           | feature_id[24].value <= threshold=48433.232421875    |
| Class: healthcare workers within 60 days after vaccination |                                                      |
|                                                            |                                                      |
| Rules_5                                                    | passed counts:38                                     |
| node_0: feature_name=HuIgG_0.03                            | feature_id[44].value > threshold=3298.333251953125   |
| node_78: feature_name=a-HuIgG_0.03                         | feature_id[1].value <= threshold=19665.666015625     |
| node_79: feature_name=SARS.CoV.2.S1.mFcTag                 | feature_id[0].value <= threshold=54010.166015625     |

|                                                         |                                                      |
|---------------------------------------------------------|------------------------------------------------------|
| node_80: feature_name=SARS.CoV.2.S1+S2                  | feature_id[18].value <= threshold=48317.708984375    |
| node_81: feature_name=SARS.CoV.2.Spike.RBD.His.Bac      | feature_id[9].value > threshold=16347.4580078125     |
| node_111: feature_name=hCoV.NL63.S1                     | feature_id[5].value > threshold=4866.533447265625    |
| node_123: feature_name=MERS.CoV.S1.RBD.367.606.rFcTag   | feature_id[3].value > threshold=2789.3416748046875   |
| node_161: feature_name=SARS.CoV.S1.HisTag               | feature_id[14].value <= threshold=4926.39990234375   |
| node_162: feature_name=a-MoIgA_0.10                     | feature_id[36].value <= threshold=3108.3333740234375 |
| node_163: feature_name=Flu.B_Mal/.HA1+HA2               | feature_id[25].value > threshold=38684.7265625       |
| node_167: feature_name=SARS.CoV.NP                      | feature_id[19].value <= threshold=18293.6826171875   |
| node_168: feature_name=a-HuIgG_0.03                     | feature_id[1].value > threshold=10603.0              |
| node_172: feature_name=a-HuIgM_0.30                     | feature_id[32].value <= threshold=29969.8330078125   |
| Class: healthcare workers 60–180 days after vaccination |                                                      |
|                                                         |                                                      |
| Rules_6                                                 | passed counts:36                                     |
| node_0: feature_name=HuIgG_0.03                         | feature_id[44].value > threshold=3298.333251953125   |
| node_78: feature_name=a-HuIgG_0.03                      | feature_id[1].value <= threshold=19665.666015625     |
| node_79: feature_name=SARS.CoV.2.S1.mFcTag              | feature_id[0].value <= threshold=54010.166015625     |
| node_80: feature_name=SARS.CoV.2.S1+S2                  | feature_id[18].value > threshold=48317.708984375     |
| node_224: feature_name=a-MoIgG_0.10                     | feature_id[38].value > threshold=2066.8333129882812  |
| node_226: feature_name=HuIgM_0.30                       | feature_id[13].value > threshold=750.1666870117188   |
| node_238: feature_name=HuIgM_0.30                       | feature_id[13].value > threshold=760.3333435058594   |
| node_240: feature_name=hCoV.OC43.HE                     | feature_id[10].value > threshold=3879.75             |
| node_246: feature_name=a-HuIgA_0.30                     | feature_id[27].value > threshold=1379.8333740234375  |
| node_248: feature_name=Flu.H1N1.HA1                     | feature_id[26].value <= threshold=53891.083984375    |
| node_249: feature_name=MERS.CoV.S1.RBD.367.606.rFcTag   | feature_id[3].value > threshold=1486.7666625976562   |
| node_253: feature_name=HuIgM_0.03                       | feature_id[45].value <= threshold=-56.33333396911621 |

|                                                            |                                                      |
|------------------------------------------------------------|------------------------------------------------------|
| node_254: feature_name=MoIgA_0.30                          | feature_id[46].value > threshold=900.1666564941406   |
| node_258: feature_name=SARS.CoV.2.S1.mFcTag                | feature_id[0].value <= threshold=53346.333984375     |
| node_259: feature_name=SARS.CoV.2.S1                       | feature_id[15].value > threshold=47301.333984375     |
| Class: healthcare workers within 60 days after vaccination |                                                      |
|                                                            |                                                      |
| Rules_7                                                    | passed counts:33                                     |
| node_0: feature_name=HuIgG_0.03                            | feature_id[44].value <= threshold=3298.333251953125  |
| node_1: feature_name=SARS.CoV.2.S1.mFcTag                  | feature_id[0].value > threshold=5354.388916015625    |
| node_9: feature_name=HuIgM_0.03                            | feature_id[45].value <= threshold=-80.66666793823242 |
| node_10: feature_name=SARS.CoV.2.Spike.RBD.His.Bac         | feature_id[9].value <= threshold=29393.55859375      |
| node_11: feature_name=DcCoV.HKU23.NP                       | feature_id[21].value > threshold=-639.3333129882812  |
| node_13: feature_name=MERS.CoV.S1.ECD.1-1297.HisTag        | feature_id[12].value > threshold=1026.1666564941406  |
| Class: healthcare workers over 180 days after vaccination  |                                                      |
|                                                            |                                                      |
| Rules_8                                                    | passed counts:30                                     |
| node_0: feature_name=HuIgG_0.03                            | feature_id[44].value > threshold=3298.333251953125   |
| node_78: feature_name=a-HuIgG_0.03                         | feature_id[1].value <= threshold=19665.666015625     |
| node_79: feature_name=SARS.CoV.2.S1.mFcTag                 | feature_id[0].value <= threshold=54010.166015625     |
| node_80: feature_name=SARS.CoV.2.S1+S2                     | feature_id[18].value <= threshold=48317.708984375    |
| node_81: feature_name=SARS.CoV.2.Spike.RBD.His.Bac         | feature_id[9].value <= threshold=16347.4580078125    |
| node_82: feature_name=SARS.CoV.2.S1                        | feature_id[15].value > threshold=2844.6334228515625  |
| node_90: feature_name=a-MoIgG_0.10                         | feature_id[38].value > threshold=1482.3333129882812  |
| node_98: feature_name=Flu.H1N1.HA1                         | feature_id[26].value <= threshold=52934.66015625     |
| node_99: feature_name=Flu.B_Phu/.HA1                       | feature_id[11].value > threshold=27915.5419921875    |
| node_105: feature_name=SARS.CoV.NP                         | feature_id[19].value > threshold=310.9027671813965   |

|                                                            |                                                    |
|------------------------------------------------------------|----------------------------------------------------|
| Class: healthcare workers within 60 days after vaccination |                                                    |
|                                                            |                                                    |
| Rules_9                                                    | passed counts:27                                   |
| node_0: feature_name=HuIgG_0.03                            | feature_id[44].value > threshold=3298.333251953125 |
| node_78: feature_name=a-HuIgG_0.03                         | feature_id[1].value <= threshold=19665.666015625   |
| node_79: feature_name=SARS.CoV.2.S1.mFcTag                 | feature_id[0].value <= threshold=54010.166015625   |
| node_80: feature_name=SARS.CoV.2.S1+S2                     | feature_id[18].value <= threshold=48317.708984375  |
| node_81: feature_name=SARS.CoV.2.Spike.RBD.His.Bac         | feature_id[9].value > threshold=16347.4580078125   |
| node_111: feature_name=hCoV.NL63.S1                        | feature_id[5].value > threshold=4866.533447265625  |
| node_123: feature_name=MERS.CoV.S1.RBD.367.606.rFcTag      | feature_id[3].value > threshold=2789.3416748046875 |
| node_161: feature_name=SARS.CoV.S1.HisTag                  | feature_id[14].value > threshold=4926.39990234375  |
| node_179: feature_name=hCoV.HKU1.S1_S2                     | feature_id[22].value <= threshold=48084.783203125  |
| node_180: feature_name=SARS.CoV.2.Spike.RBD.His.Bac        | feature_id[9].value > threshold=31607.125          |
| node_200: feature_name=SARS.CoV.2.S1.HisTag                | feature_id[16].value <= threshold=43902.201171875  |
| node_201: feature_name=Flu.H1N1.HA1+HA2                    | feature_id[6].value > threshold=30743.5            |
| node_205: feature_name=Flu.B_Phu/.HA1                      | feature_id[11].value > threshold=18442.14111328125 |
| node_207: feature_name=SARS.CoV.2.Spike.RBD.rFc            | feature_id[7].value > threshold=39119.033203125    |
| node_209: feature_name=MERS.CoV.S1.ECD.1-1297.HisTag       | feature_id[12].value > threshold=11020.70849609375 |
| Class: healthcare workers 60–180 days after vaccination    |                                                    |
|                                                            |                                                    |
| Rules_10                                                   | passed counts:26                                   |
| node_0: feature_name=HuIgG_0.03                            | feature_id[44].value > threshold=3298.333251953125 |
| node_78: feature_name=a-HuIgG_0.03                         | feature_id[1].value > threshold=19665.666015625    |
| node_360: feature_name=HuIgM_0.03                          | feature_id[45].value > threshold=-189.0            |
| node_366: feature_name=HuIgM_0.30                          | feature_id[13].value > threshold=441.8333282470703 |

|                                                           |                                                     |
|-----------------------------------------------------------|-----------------------------------------------------|
| node_368: feature_name=a-HuIgG_0.10                       | feature_id[31].value > threshold=32914.5            |
| node_372: feature_name=a-MoIgG_0.10                       | feature_id[38].value <= threshold=20281.6669921875  |
| node_373: feature_name=hCoV.229E.S1                       | feature_id[2].value <= threshold=54372.5            |
| Class: healthcare workers over 180 days after vaccination |                                                     |
|                                                           |                                                     |
| Rules_11                                                  | passed counts:25                                    |
| node_0: feature_name=HuIgG_0.03                           | feature_id[44].value > threshold=3298.333251953125  |
| node_78: feature_name=a-HuIgG_0.03                        | feature_id[1].value <= threshold=19665.666015625    |
| node_79: feature_name=SARS.CoV.2.S1.mFcTag                | feature_id[0].value > threshold=54010.166015625     |
| node_297: feature_name=a-MoIgG_0.10                       | feature_id[38].value > threshold=2382.8333740234375 |
| node_303: feature_name=SARS.CoV.2.S1                      | feature_id[15].value <= threshold=51713.66796875    |
| node_304: feature_name=hCoV.HKU1.S1_AA1.760               | feature_id[8].value > threshold=16192.1669921875    |
| node_310: feature_name=a-HuIgM_0.10                       | feature_id[33].value > threshold=176.5              |
| node_314: feature_name=SARS.CoV.2.S1+S2                   | feature_id[18].value > threshold=50299.93359375     |
| node_318: feature_name=a-HuIgG_0.30                       | feature_id[30].value > threshold=47587.833984375    |
| node_336: feature_name=hCoV.HKU1.S1_AA1.760               | feature_id[8].value <= threshold=45964.3828125      |
| node_337: feature_name=SARS.CoV.2.S1+S2                   | feature_id[18].value > threshold=50700.5            |
| node_339: feature_name=a-MoIgA_0.30                       | feature_id[35].value > threshold=1534.1666259765625 |
| Class: healthcare workers 60–180 days after vaccination   |                                                     |
|                                                           |                                                     |
| Rules_12                                                  | passed counts:23                                    |
| node_0: feature_name=HuIgG_0.03                           | feature_id[44].value > threshold=3298.333251953125  |
| node_78: feature_name=a-HuIgG_0.03                        | feature_id[1].value <= threshold=19665.666015625    |
| node_79: feature_name=SARS.CoV.2.S1.mFcTag                | feature_id[0].value > threshold=54010.166015625     |
| node_297: feature_name=a-MoIgG_0.10                       | feature_id[38].value > threshold=2382.8333740234375 |

|                                                            |                                                     |
|------------------------------------------------------------|-----------------------------------------------------|
| node_303: feature_name=SARS.CoV.2.S1                       | feature_id[15].value <= threshold=51713.66796875    |
| node_304: feature_name=hCoV.HKU1.S1_AA1.760                | feature_id[8].value > threshold=16192.1669921875    |
| node_310: feature_name=a-HuIgM_0.10                        | feature_id[33].value > threshold=176.5              |
| node_314: feature_name=SARS.CoV.2.S1+S2                    | feature_id[18].value <= threshold=50299.93359375    |
| node_315: feature_name=a-HuIgA_0.03                        | feature_id[29].value > threshold=-68.0              |
| Class: healthcare workers 60–180 days after vaccination    |                                                     |
|                                                            |                                                     |
| Rules_13                                                   | passed counts:23                                    |
| node_0: feature_name=HuIgG_0.03                            | feature_id[44].value > threshold=3298.333251953125  |
| node_78: feature_name=a-HuIgG_0.03                         | feature_id[1].value <= threshold=19665.666015625    |
| node_79: feature_name=SARS.CoV.2.S1.mFcTag                 | feature_id[0].value <= threshold=54010.166015625    |
| node_80: feature_name=SARS.CoV.2.S1+S2                     | feature_id[18].value <= threshold=48317.708984375   |
| node_81: feature_name=SARS.CoV.2.Spike.RBD.His.Bac         | feature_id[9].value > threshold=16347.4580078125    |
| node_111: feature_name=hCoV.NL63.S1                        | feature_id[5].value > threshold=4866.533447265625   |
| node_123: feature_name=MERS.CoV.S1.RBD.367.606.rFcTag      | feature_id[3].value <= threshold=2789.3416748046875 |
| node_124: feature_name=SARS.CoV.2.S1+S2                    | feature_id[18].value > threshold=41798.25           |
| node_140: feature_name=SARS.CoV.2.S1.RBD.mFc               | feature_id[17].value > threshold=44491.166015625    |
| Class: healthcare workers within 60 days after vaccination |                                                     |
|                                                            |                                                     |
| Rules_14                                                   | passed counts:22                                    |
| node_0: feature_name=HuIgG_0.03                            | feature_id[44].value > threshold=3298.333251953125  |
| node_78: feature_name=a-HuIgG_0.03                         | feature_id[1].value <= threshold=19665.666015625    |
| node_79: feature_name=SARS.CoV.2.S1.mFcTag                 | feature_id[0].value <= threshold=54010.166015625    |
| node_80: feature_name=SARS.CoV.2.S1+S2                     | feature_id[18].value > threshold=48317.708984375    |
| node_224: feature_name=a-MoIgG_0.10                        | feature_id[38].value > threshold=2066.8333129882812 |



|                                                            |                                                      |
|------------------------------------------------------------|------------------------------------------------------|
| node_226: feature_name=HuIgM_0.30                          | feature_id[13].value > threshold=750.1666870117188   |
| node_238: feature_name=HuIgM_0.30                          | feature_id[13].value > threshold=760.3333435058594   |
| node_240: feature_name=hCoV.OC43.HE                        | feature_id[10].value > threshold=3879.75             |
| node_246: feature_name=a-HuIgA_0.30                        | feature_id[27].value > threshold=1379.8333740234375  |
| node_248: feature_name=Flu.H1N1.HA1                        | feature_id[26].value <= threshold=53891.083984375    |
| node_249: feature_name=MERS.CoV.S1.RBD.367.606.rFcTag      | feature_id[3].value > threshold=1486.7666625976562   |
| node_253: feature_name=HuIgM_0.03                          | feature_id[45].value <= threshold=-56.33333396911621 |
| node_254: feature_name=MoIgA_0.30                          | feature_id[46].value > threshold=900.1666564941406   |
| node_258: feature_name=SARS.CoV.2.S1.mFcTag                | feature_id[0].value <= threshold=53346.333984375     |
| node_259: feature_name=SARS.CoV.2.S1                       | feature_id[15].value <= threshold=47301.333984375    |
| node_260: feature_name=a-MoIgM_0.03                        | feature_id[41].value > threshold=127.16666793823242  |
| node_262: feature_name=hCoV.OC43.HE                        | feature_id[10].value > threshold=12272.5166015625    |
| node_268: feature_name=HuIgM_0.03                          | feature_id[45].value <= threshold=-57.16666603088379 |
| Class: healthcare workers within 60 days after vaccination |                                                      |
|                                                            |                                                      |
| Rules_15                                                   | passed counts:22                                     |
| node_0: feature_name=HuIgG_0.03                            | feature_id[44].value > threshold=3298.333251953125   |
| node_78: feature_name=a-HuIgG_0.03                         | feature_id[1].value <= threshold=19665.666015625     |
| node_79: feature_name=SARS.CoV.2.S1.mFcTag                 | feature_id[0].value <= threshold=54010.166015625     |
| node_80: feature_name=SARS.CoV.2.S1+S2                     | feature_id[18].value <= threshold=48317.708984375    |
| node_81: feature_name=SARS.CoV.2.Spike.RBD.His.Bac         | feature_id[9].value > threshold=16347.4580078125     |
| node_111: feature_name=hCoV.NL63.S1                        | feature_id[5].value > threshold=4866.533447265625    |
| node_123: feature_name=MERS.CoV.S1.RBD.367.606.rFcTag      | feature_id[3].value <= threshold=2789.3416748046875  |
| node_124: feature_name=SARS.CoV.2.S1+S2                    | feature_id[18].value > threshold=41798.25            |
| node_140: feature_name=SARS.CoV.2.S1.RBD.mFc               | feature_id[17].value <= threshold=44491.166015625    |

|                                                            |                                                     |
|------------------------------------------------------------|-----------------------------------------------------|
| node_141: feature_name=a-HuIgM_0.03                        | feature_id[34].value > threshold=-6.833333492279053 |
| node_149: feature_name=a-MoIgA_0.30                        | feature_id[35].value > threshold=935.3333435058594  |
| node_151: feature_name=HuIgM_0.30                          | feature_id[13].value <= threshold=1110.5            |
| node_152: feature_name=a-HuIgG_0.30                        | feature_id[30].value <= threshold=46032.0           |
| Class: healthcare workers within 60 days after vaccination |                                                     |
|                                                            |                                                     |
| Rules_16                                                   | passed counts:21                                    |
| node_0: feature_name=HuIgG_0.03                            | feature_id[44].value > threshold=3298.333251953125  |
| node_78: feature_name=a-HuIgG_0.03                         | feature_id[1].value <= threshold=19665.666015625    |
| node_79: feature_name=SARS.CoV.2.S1.mFcTag                 | feature_id[0].value > threshold=54010.166015625     |
| node_297: feature_name=a-MoIgG_0.10                        | feature_id[38].value > threshold=2382.8333740234375 |
| node_303: feature_name=SARS.CoV.2.S1                       | feature_id[15].value > threshold=51713.66796875     |
| node_345: feature_name=SARS.CoV.2.S1.HisTag                | feature_id[16].value > threshold=51766.75           |
| node_347: feature_name=HuIgA_0.03                          | feature_id[43].value > threshold=-60.33333396911621 |
| node_353: feature_name=SARS.CoV.2.Spike.RBD.His.Bac        | feature_id[9].value <= threshold=51551.166015625    |
| node_354: feature_name=SARS.CoV.NP                         | feature_id[19].value > threshold=3082.949951171875  |
| Class: healthcare workers within 60 days after vaccination |                                                     |
|                                                            |                                                     |
| Rules_17                                                   | passed counts:19                                    |
| node_0: feature_name=HuIgG_0.03                            | feature_id[44].value > threshold=3298.333251953125  |
| node_78: feature_name=a-HuIgG_0.03                         | feature_id[1].value <= threshold=19665.666015625    |
| node_79: feature_name=SARS.CoV.2.S1.mFcTag                 | feature_id[0].value <= threshold=54010.166015625    |
| node_80: feature_name=SARS.CoV.2.S1+S2                     | feature_id[18].value <= threshold=48317.708984375   |
| node_81: feature_name=SARS.CoV.2.Spike.RBD.His.Bac         | feature_id[9].value > threshold=16347.4580078125    |
| node_111: feature_name=hCoV.NL63.S1                        | feature_id[5].value > threshold=4866.533447265625   |

|                                                            |                                                      |
|------------------------------------------------------------|------------------------------------------------------|
| node_123: feature_name=MERS.CoV.S1.RBD.367.606.rFcTag      | feature_id[3].value > threshold=2789.3416748046875   |
| node_161: feature_name=SARS.CoV.S1.HisTag                  | feature_id[14].value > threshold=4926.39990234375    |
| node_179: feature_name=hCoV.HKU1.S1_S2                     | feature_id[22].value > threshold=48084.783203125     |
| node_217: feature_name=MoIgA_0.30                          | feature_id[46].value <= threshold=24299.6669921875   |
| node_218: feature_name=DcCoV.HKU23.NP                      | feature_id[21].value > threshold=20749.25            |
| Class: healthcare workers within 60 days after vaccination |                                                      |
|                                                            |                                                      |
| Rules_18                                                   | passed counts:18                                     |
| node_0: feature_name=HuIgG_0.03                            | feature_id[44].value > threshold=3298.333251953125   |
| node_78: feature_name=a-HuIgG_0.03                         | feature_id[1].value <= threshold=19665.666015625     |
| node_79: feature_name=SARS.CoV.2.S1.mFcTag                 | feature_id[0].value <= threshold=54010.166015625     |
| node_80: feature_name=SARS.CoV.2.S1+S2                     | feature_id[18].value <= threshold=48317.708984375    |
| node_81: feature_name=SARS.CoV.2.Spike.RBD.His.Bac         | feature_id[9].value > threshold=16347.4580078125     |
| node_111: feature_name=hCoV.NL63.S1                        | feature_id[5].value > threshold=4866.533447265625    |
| node_123: feature_name=MERS.CoV.S1.RBD.367.606.rFcTag      | feature_id[3].value > threshold=2789.3416748046875   |
| node_161: feature_name=SARS.CoV.S1.HisTag                  | feature_id[14].value > threshold=4926.39990234375    |
| node_179: feature_name=hCoV.HKU1.S1_S2                     | feature_id[22].value <= threshold=48084.783203125    |
| node_180: feature_name=SARS.CoV.2.Spike.RBD.His.Bac        | feature_id[9].value <= threshold=31607.125           |
| node_181: feature_name=SARS.CoV.2.S1                       | feature_id[15].value > threshold=33718.333984375     |
| node_191: feature_name=a-HuIgA_0.30                        | feature_id[27].value > threshold=1819.5              |
| node_193: feature_name=HuIgM_0.30                          | feature_id[13].value <= threshold=1081.8333740234375 |
| node_194: feature_name=hCoV.NL63.S1                        | feature_id[5].value > threshold=6020.75830078125     |
| Class: healthcare workers within 60 days after vaccination |                                                      |
|                                                            |                                                      |
| Rules_19                                                   | passed counts:17                                     |

|                                                           |                                                      |
|-----------------------------------------------------------|------------------------------------------------------|
| node_0: feature_name=HuIgG_0.03                           | feature_id[44].value > threshold=3298.333251953125   |
| node_78: feature_name=a-HuIgG_0.03                        | feature_id[1].value <= threshold=19665.666015625     |
| node_79: feature_name=SARS.CoV.2.S1.mFcTag                | feature_id[0].value > threshold=54010.166015625      |
| node_297: feature_name=a-MoIgG_0.10                       | feature_id[38].value > threshold=2382.8333740234375  |
| node_303: feature_name=SARS.CoV.2.S1                      | feature_id[15].value <= threshold=51713.66796875     |
| node_304: feature_name=hCoV.HKU1.S1_AA1.760               | feature_id[8].value > threshold=16192.1669921875     |
| node_310: feature_name=a-HuIgM_0.10                       | feature_id[33].value > threshold=176.5               |
| node_314: feature_name=SARS.CoV.2.S1+S2                   | feature_id[18].value > threshold=50299.93359375      |
| node_318: feature_name=a-HuIgG_0.30                       | feature_id[30].value <= threshold=47587.833984375    |
| node_319: feature_name=MERS.CoV.S1.RBD.367.606.rFcTag     | feature_id[3].value > threshold=3945.61669921875     |
| node_323: feature_name=a-MoIgG_0.10                       | feature_id[38].value <= threshold=6842.166748046875  |
| node_324: feature_name=a-HuIgA_0.10                       | feature_id[28].value <= threshold=2405.8333740234375 |
| Class: healthcare workers 60–180 days after vaccination   |                                                      |
|                                                           |                                                      |
| Rules_20                                                  | passed counts:17                                     |
| node_0: feature_name=HuIgG_0.03                           | feature_id[44].value <= threshold=3298.333251953125  |
| node_1: feature_name=SARS.CoV.2.S1.mFcTag                 | feature_id[0].value > threshold=5354.388916015625    |
| node_9: feature_name=HuIgM_0.03                           | feature_id[45].value > threshold=-80.66666793823242  |
| node_27: feature_name=HuIgM_0.03                          | feature_id[45].value > threshold=61.33333206176758   |
| node_75: feature_name=HuIgA_0.10                          | feature_id[42].value <= threshold=1386.3333435058594 |
| Class: healthcare workers over 180 days after vaccination |                                                      |
|                                                           |                                                      |
| Rules_21                                                  | passed counts:15                                     |
| node_0: feature_name=HuIgG_0.03                           | feature_id[44].value > threshold=3298.333251953125   |
| node_78: feature_name=a-HuIgG_0.03                        | feature_id[1].value <= threshold=19665.666015625     |

|                                                         |                                                      |
|---------------------------------------------------------|------------------------------------------------------|
| node_79: feature_name=SARS.CoV.2.S1.mFcTag              | feature_id[0].value <= threshold=54010.166015625     |
| node_80: feature_name=SARS.CoV.2.S1+S2                  | feature_id[18].value <= threshold=48317.708984375    |
| node_81: feature_name=SARS.CoV.2.Spike.RBD.His.Bac      | feature_id[9].value > threshold=16347.4580078125     |
| node_111: feature_name=hCoV.NL63.S1                     | feature_id[5].value > threshold=4866.533447265625    |
| node_123: feature_name=MERS.CoV.S1.RBD.367.606.rFcTag   | feature_id[3].value <= threshold=2789.3416748046875  |
| node_124: feature_name=SARS.CoV.2.S1+S2                 | feature_id[18].value <= threshold=41798.25           |
| node_125: feature_name=hCoV.OC43.S1_S2ECD.HisTag        | feature_id[24].value <= threshold=49554.1328125      |
| node_126: feature_name=SARS.CoV.2.Spike.RBD.His.Bac     | feature_id[9].value > threshold=23295.4169921875     |
| node_130: feature_name=Flu.H1N1.HA1                     | feature_id[26].value > threshold=30553.0             |
| node_134: feature_name=MERS.CoV.S1.RBD.367.606.rFcTag   | feature_id[3].value > threshold=983.2499694824219    |
| node_136: feature_name=a-MoIgA_0.03                     | feature_id[37].value <= threshold=503.50001525878906 |
| Class: healthcare workers 60–180 days after vaccination |                                                      |
|                                                         |                                                      |
| Rules_22                                                | passed counts:13                                     |
| node_0: feature_name=HuIgG_0.03                         | feature_id[44].value > threshold=3298.333251953125   |
| node_78: feature_name=a-HuIgG_0.03                      | feature_id[1].value <= threshold=19665.666015625     |
| node_79: feature_name=SARS.CoV.2.S1.mFcTag              | feature_id[0].value > threshold=54010.166015625      |
| node_297: feature_name=a-MoIgG_0.10                     | feature_id[38].value > threshold=2382.8333740234375  |
| node_303: feature_name=SARS.CoV.2.S1                    | feature_id[15].value <= threshold=51713.66796875     |
| node_304: feature_name=hCoV.HKU1.S1_AA1.760             | feature_id[8].value > threshold=16192.1669921875     |
| node_310: feature_name=a-HuIgM_0.10                     | feature_id[33].value > threshold=176.5               |
| node_314: feature_name=SARS.CoV.2.S1+S2                 | feature_id[18].value > threshold=50299.93359375      |
| node_318: feature_name=a-HuIgG_0.30                     | feature_id[30].value <= threshold=47587.833984375    |
| node_319: feature_name=MERS.CoV.S1.RBD.367.606.rFcTag   | feature_id[3].value <= threshold=3945.61669921875    |
| node_320: feature_name=Flu.H1N1.HA1                     | feature_id[26].value <= threshold=52361.833984375    |

|                                                            |                                                     |
|------------------------------------------------------------|-----------------------------------------------------|
| Class: healthcare workers within 60 days after vaccination |                                                     |
|                                                            |                                                     |
| Rules_23                                                   | passed counts:13                                    |
| node_0: feature_name=HuIgG_0.03                            | feature_id[44].value > threshold=3298.333251953125  |
| node_78: feature_name=a-HuIgG_0.03                         | feature_id[1].value <= threshold=19665.666015625    |
| node_79: feature_name=SARS.CoV.2.S1.mFcTag                 | feature_id[0].value <= threshold=54010.166015625    |
| node_80: feature_name=SARS.CoV.2.S1+S2                     | feature_id[18].value <= threshold=48317.708984375   |
| node_81: feature_name=SARS.CoV.2.Spike.RBD.His.Bac         | feature_id[9].value > threshold=16347.4580078125    |
| node_111: feature_name=hCoV.NL63.S1                        | feature_id[5].value > threshold=4866.533447265625   |
| node_123: feature_name=MERS.CoV.S1.RBD.367.606.rFcTag      | feature_id[3].value > threshold=2789.3416748046875  |
| node_161: feature_name=SARS.CoV.S1.HisTag                  | feature_id[14].value > threshold=4926.39990234375   |
| node_179: feature_name=hCoV.HKU1.S1_S2                     | feature_id[22].value <= threshold=48084.783203125   |
| node_180: feature_name=SARS.CoV.2.Spike.RBD.His.Bac        | feature_id[9].value <= threshold=31607.125          |
| node_181: feature_name=SARS.CoV.2.S1                       | feature_id[15].value <= threshold=33718.333984375   |
| node_182: feature_name=a-HuIgG_0.03                        | feature_id[1].value <= threshold=15402.5            |
| node_183: feature_name=a-HuIgM_0.30                        | feature_id[32].value > threshold=1969.0000610351562 |
| node_185: feature_name=SARS.CoV.NP                         | feature_id[19].value > threshold=1277.2083435058594 |
| Class: healthcare workers 60–180 days after vaccination    |                                                     |
|                                                            |                                                     |
| Rules_24                                                   | passed counts:13                                    |
| node_0: feature_name=HuIgG_0.03                            | feature_id[44].value <= threshold=3298.333251953125 |
| node_1: feature_name=SARS.CoV.2.S1.mFcTag                  | feature_id[0].value > threshold=5354.388916015625   |
| node_9: feature_name=HuIgM_0.03                            | feature_id[45].value > threshold=-80.66666793823242 |
| node_27: feature_name=HuIgM_0.03                           | feature_id[45].value <= threshold=61.33333206176758 |
| node_28: feature_name=a-HuIgG_0.30                         | feature_id[30].value > threshold=34878.66796875     |

|                                                            |                                                      |
|------------------------------------------------------------|------------------------------------------------------|
| node_64: feature_name=a-HuIgG_0.03                         | feature_id[1].value > threshold=9340.3330078125      |
| node_68: feature_name=a-HuIgA_0.30                         | feature_id[27].value > threshold=1918.1666870117188  |
| node_72: feature_name=HuIgM_0.03                           | feature_id[45].value <= threshold=20.333333492279053 |
| Class: healthcare workers over 180 days after vaccination  |                                                      |
|                                                            |                                                      |
| Rules_25                                                   | passed counts:12                                     |
| node_0: feature_name=HuIgG_0.03                            | feature_id[44].value > threshold=3298.333251953125   |
| node_78: feature_name=a-HuIgG_0.03                         | feature_id[1].value <= threshold=19665.666015625     |
| node_79: feature_name=SARS.CoV.2.S1.mFcTag                 | feature_id[0].value <= threshold=54010.166015625     |
| node_80: feature_name=SARS.CoV.2.S1+S2                     | feature_id[18].value <= threshold=48317.708984375    |
| node_81: feature_name=SARS.CoV.2.Spike.RBD.His.Bac         | feature_id[9].value <= threshold=16347.4580078125    |
| node_82: feature_name=SARS.CoV.2.S1                        | feature_id[15].value <= threshold=2844.6334228515625 |
| node_83: feature_name=SARS.CoV.2.S1+S2                     | feature_id[18].value > threshold=3298.25             |
| Class: unvaccinated healthcare workers                     |                                                      |
|                                                            |                                                      |
| Rules_26                                                   | passed counts:10                                     |
| node_0: feature_name=HuIgG_0.03                            | feature_id[44].value > threshold=3298.333251953125   |
| node_78: feature_name=a-HuIgG_0.03                         | feature_id[1].value <= threshold=19665.666015625     |
| node_79: feature_name=SARS.CoV.2.S1.mFcTag                 | feature_id[0].value > threshold=54010.166015625      |
| node_297: feature_name=a-MoIgG_0.10                        | feature_id[38].value > threshold=2382.8333740234375  |
| node_303: feature_name=SARS.CoV.2.S1                       | feature_id[15].value <= threshold=51713.66796875     |
| node_304: feature_name=hCoV.HKU1.S1_AA1.760                | feature_id[8].value > threshold=16192.1669921875     |
| node_310: feature_name=a-HuIgM_0.10                        | feature_id[33].value <= threshold=176.5              |
| node_311: feature_name=a-HuIgM_0.03                        | feature_id[34].value > threshold=-86.66666793823242  |
| Class: healthcare workers within 60 days after vaccination |                                                      |

|                                                            |                                                     |
|------------------------------------------------------------|-----------------------------------------------------|
| Rules_27                                                   | passed counts:9                                     |
| node_0: feature_name=HuIgG_0.03                            | feature_id[44].value > threshold=3298.333251953125  |
| node_78: feature_name=a-HuIgG_0.03                         | feature_id[1].value <= threshold=19665.666015625    |
| node_79: feature_name=SARS.CoV.2.S1.mFcTag                 | feature_id[0].value > threshold=54010.166015625     |
| node_297: feature_name=a-MoIgG_0.10                        | feature_id[38].value > threshold=2382.8333740234375 |
| node_303: feature_name=SARS.CoV.2.S1                       | feature_id[15].value <= threshold=51713.66796875    |
| node_304: feature_name=hCoV.HKU1.S1_AA1.760                | feature_id[8].value > threshold=16192.1669921875    |
| node_310: feature_name=a-HuIgM_0.10                        | feature_id[33].value > threshold=176.5              |
| node_314: feature_name=SARS.CoV.2.S1+S2                    | feature_id[18].value > threshold=50299.93359375     |
| node_318: feature_name=a-HuIgG_0.30                        | feature_id[30].value <= threshold=47587.833984375   |
| node_319: feature_name=MERS.CoV.S1.RBD.367.606.rFcTag      | feature_id[3].value > threshold=3945.61669921875    |
| node_323: feature_name=a-MoIgG_0.10                        | feature_id[38].value > threshold=6842.166748046875  |
| node_327: feature_name=SARS.CoV.2.S1.mFcTag                | feature_id[0].value > threshold=54403.482421875     |
| node_333: feature_name=Flu.B_Mal/.HA1+HA2                  | feature_id[25].value <= threshold=53690.8828125     |
| Class: healthcare workers within 60 days after vaccination |                                                     |
| Rules_28                                                   | passed counts:9                                     |
| node_0: feature_name=HuIgG_0.03                            | feature_id[44].value > threshold=3298.333251953125  |
| node_78: feature_name=a-HuIgG_0.03                         | feature_id[1].value <= threshold=19665.666015625    |
| node_79: feature_name=SARS.CoV.2.S1.mFcTag                 | feature_id[0].value > threshold=54010.166015625     |
| node_297: feature_name=a-MoIgG_0.10                        | feature_id[38].value > threshold=2382.8333740234375 |
| node_303: feature_name=SARS.CoV.2.S1                       | feature_id[15].value <= threshold=51713.66796875    |
| node_304: feature_name=hCoV.HKU1.S1_AA1.760                | feature_id[8].value <= threshold=16192.1669921875   |
| node_305: feature_name=a-HuIgM_0.03                        | feature_id[34].value > threshold=20.666666984558105 |



|                                                            |                                                      |
|------------------------------------------------------------|------------------------------------------------------|
| Class: healthcare workers within 60 days after vaccination |                                                      |
|                                                            |                                                      |
| Rules_29                                                   | passed counts:9                                      |
| node_0: feature_name=HuIgG_0.03                            | feature_id[44].value <= threshold=3298.333251953125  |
| node_1: feature_name=SARS.CoV.2.S1.mFcTag                  | feature_id[0].value > threshold=5354.388916015625    |
| node_9: feature_name=HuIgM_0.03                            | feature_id[45].value <= threshold=-80.66666793823242 |
| node_10: feature_name=SARS.CoV.2.Spike.RBD.His.Bac         | feature_id[9].value > threshold=29393.55859375       |
| node_18: feature_name=Flu.B_Mal/.HA1                       | feature_id[4].value > threshold=38994.25             |
| node_20: feature_name=SARS.CoV.S1.HisTag                   | feature_id[14].value > threshold=11923.35009765625   |
| node_24: feature_name=SARS.CoV.2.S1.RBD.mFc                | feature_id[17].value > threshold=44304.56640625      |
| Class: healthcare workers over 180 days after vaccination  |                                                      |
|                                                            |                                                      |
| Rules_30                                                   | passed counts:8                                      |
| node_0: feature_name=HuIgG_0.03                            | feature_id[44].value > threshold=3298.333251953125   |
| node_78: feature_name=a-HuIgG_0.03                         | feature_id[1].value > threshold=19665.666015625      |
| node_360: feature_name=HuIgM_0.03                          | feature_id[45].value <= threshold=-189.0             |
| node_361: feature_name=a-HuIgA_0.03                        | feature_id[29].value <= threshold=3214.5             |
| Class: healthcare workers 60–180 days after vaccination    |                                                      |
|                                                            |                                                      |
| Rules_31                                                   | passed counts:8                                      |
| node_0: feature_name=HuIgG_0.03                            | feature_id[44].value > threshold=3298.333251953125   |
| node_78: feature_name=a-HuIgG_0.03                         | feature_id[1].value <= threshold=19665.666015625     |
| node_79: feature_name=SARS.CoV.2.S1.mFcTag                 | feature_id[0].value <= threshold=54010.166015625     |
| node_80: feature_name=SARS.CoV.2.S1+S2                     | feature_id[18].value > threshold=48317.708984375     |
| node_224: feature_name=a-MoIgG_0.10                        | feature_id[38].value > threshold=2066.8333129882812  |

|                                                         |                                                      |
|---------------------------------------------------------|------------------------------------------------------|
| node_226: feature_name=HuIgM_0.30                       | feature_id[13].value > threshold=750.1666870117188   |
| node_238: feature_name=HuIgM_0.30                       | feature_id[13].value > threshold=760.3333435058594   |
| node_240: feature_name=hCoV.OC43.HE                     | feature_id[10].value > threshold=3879.75             |
| node_246: feature_name=a-HuIgA_0.30                     | feature_id[27].value > threshold=1379.8333740234375  |
| node_248: feature_name=Flu.H1N1.HA1                     | feature_id[26].value <= threshold=53891.083984375    |
| node_249: feature_name=MERS.CoV.S1.RBD.367.606.rFcTag   | feature_id[3].value > threshold=1486.7666625976562   |
| node_253: feature_name=HuIgM_0.03                       | feature_id[45].value <= threshold=-56.33333396911621 |
| node_254: feature_name=MoIgA_0.30                       | feature_id[46].value > threshold=900.1666564941406   |
| node_258: feature_name=SARS.CoV.2.S1.mFcTag             | feature_id[0].value > threshold=53346.333984375      |
| node_272: feature_name=a-MoIgA_0.03                     | feature_id[37].value > threshold=2.3333334028720856  |
| node_274: feature_name=Flu.B_Mal/.HA1+HA2               | feature_id[25].value <= threshold=53981.70703125     |
| node_275: feature_name=a-MoIgG_0.10                     | feature_id[38].value <= threshold=22321.6669921875   |
| Class: healthcare workers 60–180 days after vaccination |                                                      |
|                                                         |                                                      |
| Rules_32                                                | passed counts:8                                      |
| node_0: feature_name=HuIgG_0.03                         | feature_id[44].value > threshold=3298.333251953125   |
| node_78: feature_name=a-HuIgG_0.03                      | feature_id[1].value <= threshold=19665.666015625     |
| node_79: feature_name=SARS.CoV.2.S1.mFcTag              | feature_id[0].value <= threshold=54010.166015625     |
| node_80: feature_name=SARS.CoV.2.S1+S2                  | feature_id[18].value <= threshold=48317.708984375    |
| node_81: feature_name=SARS.CoV.2.Spike.RBD.His.Bac      | feature_id[9].value > threshold=16347.4580078125     |
| node_111: feature_name=hCoV.NL63.S1                     | feature_id[5].value > threshold=4866.533447265625    |
| node_123: feature_name=MERS.CoV.S1.RBD.367.606.rFcTag   | feature_id[3].value <= threshold=2789.3416748046875  |
| node_124: feature_name=SARS.CoV.2.S1+S2                 | feature_id[18].value > threshold=41798.25            |
| node_140: feature_name=SARS.CoV.2.S1.RBD.mFc            | feature_id[17].value <= threshold=44491.166015625    |
| node_141: feature_name=a-HuIgM_0.03                     | feature_id[34].value <= threshold=-6.833333492279053 |

|                                                            |                                                      |
|------------------------------------------------------------|------------------------------------------------------|
| node_142: feature_name=hCoV.OC43.HE                        | feature_id[10].value > threshold=7956.5              |
| node_144: feature_name=SARS.CoV.2.S1.mFcTag                | feature_id[0].value <= threshold=52734.0             |
| node_145: feature_name=Flu.H1N1.HA1                        | feature_id[26].value > threshold=26772.75            |
| Class: healthcare workers 60–180 days after vaccination    |                                                      |
|                                                            |                                                      |
| Rules_33                                                   | passed counts:8                                      |
| node_0: feature_name=HuIgG_0.03                            | feature_id[44].value <= threshold=3298.333251953125  |
| node_1: feature_name=SARS.CoV.2.S1.mFcTag                  | feature_id[0].value > threshold=5354.388916015625    |
| node_9: feature_name=HuIgM_0.03                            | feature_id[45].value > threshold=-80.66666793823242  |
| node_27: feature_name=HuIgM_0.03                           | feature_id[45].value <= threshold=61.33333206176758  |
| node_28: feature_name=a-HuIgG_0.30                         | feature_id[30].value > threshold=34878.66796875      |
| node_64: feature_name=a-HuIgG_0.03                         | feature_id[1].value <= threshold=9340.3330078125     |
| node_65: feature_name=SARS.CoV.2.Spike.RBD.His.Bac         | feature_id[9].value > threshold=13221.6298828125     |
| Class: healthcare workers within 60 days after vaccination |                                                      |
|                                                            |                                                      |
| Rules_34                                                   | passed counts:8                                      |
| node_0: feature_name=HuIgG_0.03                            | feature_id[44].value <= threshold=3298.333251953125  |
| node_1: feature_name=SARS.CoV.2.S1.mFcTag                  | feature_id[0].value > threshold=5354.388916015625    |
| node_9: feature_name=HuIgM_0.03                            | feature_id[45].value <= threshold=-80.66666793823242 |
| node_10: feature_name=SARS.CoV.2.Spike.RBD.His.Bac         | feature_id[9].value > threshold=29393.55859375       |
| node_18: feature_name=Flu.B_Mal/.HA1                       | feature_id[4].value <= threshold=38994.25            |
| Class: healthcare workers 60–180 days after vaccination    |                                                      |
|                                                            |                                                      |
| Rules_35                                                   | passed counts:7                                      |
| node_0: feature_name=HuIgG_0.03                            | feature_id[44].value > threshold=3298.333251953125   |

|                                                           |                                                      |
|-----------------------------------------------------------|------------------------------------------------------|
| node_78: feature_name=a-HuIgG_0.03                        | feature_id[1].value <= threshold=19665.666015625     |
| node_79: feature_name=SARS.CoV.2.S1.mFcTag                | feature_id[0].value > threshold=54010.166015625      |
| node_297: feature_name=a-MoIgG_0.10                       | feature_id[38].value <= threshold=2382.8333740234375 |
| node_298: feature_name=Flu.B_Mal/.HA1                     | feature_id[4].value > threshold=41908.115234375      |
| Class: healthcare workers over 180 days after vaccination |                                                      |
|                                                           |                                                      |
| Rules_36                                                  | passed counts:7                                      |
| node_0: feature_name=HuIgG_0.03                           | feature_id[44].value > threshold=3298.333251953125   |
| node_78: feature_name=a-HuIgG_0.03                        | feature_id[1].value <= threshold=19665.666015625     |
| node_79: feature_name=SARS.CoV.2.S1.mFcTag                | feature_id[0].value <= threshold=54010.166015625     |
| node_80: feature_name=SARS.CoV.2.S1+S2                    | feature_id[18].value > threshold=48317.708984375     |
| node_224: feature_name=a-MoIgG_0.10                       | feature_id[38].value > threshold=2066.8333129882812  |
| node_226: feature_name=HuIgM_0.30                         | feature_id[13].value > threshold=750.1666870117188   |
| node_238: feature_name=HuIgM_0.30                         | feature_id[13].value > threshold=760.3333435058594   |
| node_240: feature_name=hCoV.OC43.HE                       | feature_id[10].value <= threshold=3879.75            |
| node_241: feature_name=a-HuIgM_0.10                       | feature_id[33].value > threshold=899.8333435058594   |
| node_243: feature_name=HuIgA_0.10                         | feature_id[42].value > threshold=138.1666717529297   |
| Class: healthcare workers 60–180 days after vaccination   |                                                      |
|                                                           |                                                      |
| Rules_37                                                  | passed counts:7                                      |
| node_0: feature_name=HuIgG_0.03                           | feature_id[44].value > threshold=3298.333251953125   |
| node_78: feature_name=a-HuIgG_0.03                        | feature_id[1].value <= threshold=19665.666015625     |
| node_79: feature_name=SARS.CoV.2.S1.mFcTag                | feature_id[0].value <= threshold=54010.166015625     |
| node_80: feature_name=SARS.CoV.2.S1+S2                    | feature_id[18].value <= threshold=48317.708984375    |
| node_81: feature_name=SARS.CoV.2.Spike.RBD.His.Bac        | feature_id[9].value > threshold=16347.4580078125     |

|                                                            |                                                     |
|------------------------------------------------------------|-----------------------------------------------------|
| node_111: feature_name=hCoV.NL63.S1                        | feature_id[5].value > threshold=4866.533447265625   |
| node_123: feature_name=MERS.CoV.S1.RBD.367.606.rFcTag      | feature_id[3].value <= threshold=2789.3416748046875 |
| node_124: feature_name=SARS.CoV.2.S1+S2                    | feature_id[18].value <= threshold=41798.25          |
| node_125: feature_name=hCoV.OC43.S1_S2ECD.HisTag           | feature_id[24].value <= threshold=49554.1328125     |
| node_126: feature_name=SARS.CoV.2.Spike.RBD.His.Bac        | feature_id[9].value <= threshold=23295.4169921875   |
| node_127: feature_name=hCoV.OC43.S1_S2ECD.HisTag           | feature_id[24].value > threshold=28407.0830078125   |
| Class: healthcare workers within 60 days after vaccination |                                                     |
|                                                            |                                                     |
| Rules_38                                                   | passed counts:7                                     |
| node_0: feature_name=HuIgG_0.03                            | feature_id[44].value <= threshold=3298.333251953125 |
| node_1: feature_name=SARS.CoV.2.S1.mFcTag                  | feature_id[0].value > threshold=5354.388916015625   |
| node_9: feature_name=HuIgM_0.03                            | feature_id[45].value > threshold=-80.66666793823242 |
| node_27: feature_name=HuIgM_0.03                           | feature_id[45].value <= threshold=61.33333206176758 |
| node_28: feature_name=a-HuIgG_0.30                         | feature_id[30].value <= threshold=34878.66796875    |
| node_29: feature_name=HuIgG_0.03                           | feature_id[44].value <= threshold=769.8333435058594 |
| node_30: feature_name=SARS.CoV.2.Spike.RBD.His.Bac         | feature_id[9].value <= threshold=12895.0166015625   |
| Class: healthcare workers over 180 days after vaccination  |                                                     |
|                                                            |                                                     |
| Rules_39                                                   | passed counts:6                                     |
| node_0: feature_name=HuIgG_0.03                            | feature_id[44].value <= threshold=3298.333251953125 |
| node_1: feature_name=SARS.CoV.2.S1.mFcTag                  | feature_id[0].value > threshold=5354.388916015625   |
| node_9: feature_name=HuIgM_0.03                            | feature_id[45].value > threshold=-80.66666793823242 |
| node_27: feature_name=HuIgM_0.03                           | feature_id[45].value <= threshold=61.33333206176758 |
| node_28: feature_name=a-HuIgG_0.30                         | feature_id[30].value <= threshold=34878.66796875    |
| node_29: feature_name=HuIgG_0.03                           | feature_id[44].value <= threshold=769.8333435058594 |

|                                                         |                                                     |
|---------------------------------------------------------|-----------------------------------------------------|
| node_30: feature_name=SARS.CoV.2.Spike.RBD.His.Bac      | feature_id[9].value > threshold=12895.0166015625    |
| node_32: feature_name=a-HuIgM_0.03                      | feature_id[34].value > threshold=-72.50000190734863 |
| Class: healthcare workers 60–180 days after vaccination |                                                     |
|                                                         |                                                     |
| Rules_40                                                | passed counts:5                                     |
| node_0: feature_name=HuIgG_0.03                         | feature_id[44].value > threshold=3298.333251953125  |
| node_78: feature_name=a-HuIgG_0.03                      | feature_id[1].value > threshold=19665.666015625     |
| node_360: feature_name=HuIgM_0.03                       | feature_id[45].value > threshold=-189.0             |
| node_366: feature_name=HuIgM_0.30                       | feature_id[13].value > threshold=441.8333282470703  |
| node_368: feature_name=a-HuIgG_0.10                     | feature_id[31].value <= threshold=32914.5           |
| node_369: feature_name=MERS.CoV.S1.RBD.367.606.rFcTag   | feature_id[3].value <= threshold=6711.89990234375   |
| Class: healthcare workers 60–180 days after vaccination |                                                     |
|                                                         |                                                     |
| Rules_41                                                | passed counts:5                                     |
| node_0: feature_name=HuIgG_0.03                         | feature_id[44].value > threshold=3298.333251953125  |
| node_78: feature_name=a-HuIgG_0.03                      | feature_id[1].value <= threshold=19665.666015625    |
| node_79: feature_name=SARS.CoV.2.S1.mFcTag              | feature_id[0].value <= threshold=54010.166015625    |
| node_80: feature_name=SARS.CoV.2.S1+S2                  | feature_id[18].value > threshold=48317.708984375    |
| node_224: feature_name=a-MoIgG_0.10                     | feature_id[38].value > threshold=2066.8333129882812 |
| node_226: feature_name=HuIgM_0.30                       | feature_id[13].value > threshold=750.1666870117188  |
| node_238: feature_name=HuIgM_0.30                       | feature_id[13].value > threshold=760.3333435058594  |
| node_240: feature_name=hCoV.OC43.HE                     | feature_id[10].value > threshold=3879.75            |
| node_246: feature_name=a-HuIgA_0.30                     | feature_id[27].value > threshold=1379.8333740234375 |
| node_248: feature_name=Flu.H1N1.HA1                     | feature_id[26].value <= threshold=53891.083984375   |
| node_249: feature_name=MERS.CoV.S1.RBD.367.606.rFcTag   | feature_id[3].value > threshold=1486.7666625976562  |

|                                                            |                                                      |
|------------------------------------------------------------|------------------------------------------------------|
| node_253: feature_name=HuIgM_0.03                          | feature_id[45].value <= threshold=-56.33333396911621 |
| node_254: feature_name=MoIgA_0.30                          | feature_id[46].value > threshold=900.1666564941406   |
| node_258: feature_name=SARS.CoV.2.S1.mFcTag                | feature_id[0].value > threshold=53346.333984375      |
| node_272: feature_name=a-MoIgA_0.03                        | feature_id[37].value <= threshold=2.3333334028720856 |
| Class: healthcare workers within 60 days after vaccination |                                                      |
|                                                            |                                                      |
| Rules_42                                                   | passed counts:5                                      |
| node_0: feature_name=HuIgG_0.03                            | feature_id[44].value > threshold=3298.333251953125   |
| node_78: feature_name=a-HuIgG_0.03                         | feature_id[1].value <= threshold=19665.666015625     |
| node_79: feature_name=SARS.CoV.2.S1.mFcTag                 | feature_id[0].value <= threshold=54010.166015625     |
| node_80: feature_name=SARS.CoV.2.S1+S2                     | feature_id[18].value > threshold=48317.708984375     |
| node_224: feature_name=a-MoIgG_0.10                        | feature_id[38].value > threshold=2066.8333129882812  |
| node_226: feature_name=HuIgM_0.30                          | feature_id[13].value > threshold=750.1666870117188   |
| node_238: feature_name=HuIgM_0.30                          | feature_id[13].value > threshold=760.3333435058594   |
| node_240: feature_name=hCoV.OC43.HE                        | feature_id[10].value > threshold=3879.75             |
| node_246: feature_name=a-HuIgA_0.30                        | feature_id[27].value > threshold=1379.8333740234375  |
| node_248: feature_name=Flu.H1N1.HA1                        | feature_id[26].value <= threshold=53891.083984375    |
| node_249: feature_name=MERS.CoV.S1.RBD.367.606.rFcTag      | feature_id[3].value > threshold=1486.7666625976562   |
| node_253: feature_name=HuIgM_0.03                          | feature_id[45].value <= threshold=-56.33333396911621 |
| node_254: feature_name=MoIgA_0.30                          | feature_id[46].value <= threshold=900.1666564941406  |
| node_255: feature_name=SARS.CoV.2.S1.RBD.mFc               | feature_id[17].value <= threshold=51784.3828125      |
| Class: healthcare workers 60–180 days after vaccination    |                                                      |
|                                                            |                                                      |
| Rules_43                                                   | passed counts:5                                      |
| node_0: feature_name=HuIgG_0.03                            | feature_id[44].value > threshold=3298.333251953125   |

|                                                            |                                                    |
|------------------------------------------------------------|----------------------------------------------------|
| node_78: feature_name=a-HuIgG_0.03                         | feature_id[1].value <= threshold=19665.666015625   |
| node_79: feature_name=SARS.CoV.2.S1.mFcTag                 | feature_id[0].value <= threshold=54010.166015625   |
| node_80: feature_name=SARS.CoV.2.S1+S2                     | feature_id[18].value <= threshold=48317.708984375  |
| node_81: feature_name=SARS.CoV.2.Spike.RBD.His.Bac         | feature_id[9].value > threshold=16347.4580078125   |
| node_111: feature_name=hCoV.NL63.S1                        | feature_id[5].value > threshold=4866.533447265625  |
| node_123: feature_name=MERS.CoV.S1.RBD.367.606.rFcTag      | feature_id[3].value > threshold=2789.3416748046875 |
| node_161: feature_name=SARS.CoV.S1.HisTag                  | feature_id[14].value > threshold=4926.39990234375  |
| node_179: feature_name=hCoV.HKU1.S1_S2                     | feature_id[22].value <= threshold=48084.783203125  |
| node_180: feature_name=SARS.CoV.2.Spike.RBD.His.Bac        | feature_id[9].value > threshold=31607.125          |
| node_200: feature_name=SARS.CoV.2.S1.HisTag                | feature_id[16].value > threshold=43902.201171875   |
| node_214: feature_name=SARS.CoV.2.S1.mFcTag                | feature_id[0].value > threshold=51362.833984375    |
| Class: healthcare workers within 60 days after vaccination |                                                    |
|                                                            |                                                    |
| Rules_44                                                   | passed counts:5                                    |
| node_0: feature_name=HuIgG_0.03                            | feature_id[44].value > threshold=3298.333251953125 |
| node_78: feature_name=a-HuIgG_0.03                         | feature_id[1].value <= threshold=19665.666015625   |
| node_79: feature_name=SARS.CoV.2.S1.mFcTag                 | feature_id[0].value <= threshold=54010.166015625   |
| node_80: feature_name=SARS.CoV.2.S1+S2                     | feature_id[18].value <= threshold=48317.708984375  |
| node_81: feature_name=SARS.CoV.2.Spike.RBD.His.Bac         | feature_id[9].value > threshold=16347.4580078125   |
| node_111: feature_name=hCoV.NL63.S1                        | feature_id[5].value > threshold=4866.533447265625  |
| node_123: feature_name=MERS.CoV.S1.RBD.367.606.rFcTag      | feature_id[3].value > threshold=2789.3416748046875 |
| node_161: feature_name=SARS.CoV.S1.HisTag                  | feature_id[14].value > threshold=4926.39990234375  |
| node_179: feature_name=hCoV.HKU1.S1_S2                     | feature_id[22].value <= threshold=48084.783203125  |
| node_180: feature_name=SARS.CoV.2.Spike.RBD.His.Bac        | feature_id[9].value <= threshold=31607.125         |
| node_181: feature_name=SARS.CoV.2.S1                       | feature_id[15].value > threshold=33718.333984375   |



|                                                         |                                                      |
|---------------------------------------------------------|------------------------------------------------------|
| node_191: feature_name=a-HuIgA_0.30                     | feature_id[27].value > threshold=1819.5              |
| node_193: feature_name=HuIgM_0.30                       | feature_id[13].value > threshold=1081.8333740234375  |
| node_197: feature_name=hCoV.HKU1.S1_S2                  | feature_id[22].value <= threshold=44172.416015625    |
| Class: healthcare workers 60–180 days after vaccination |                                                      |
|                                                         |                                                      |
| Rules_45                                                | passed counts:5                                      |
| node_0: feature_name=HuIgG_0.03                         | feature_id[44].value > threshold=3298.333251953125   |
| node_78: feature_name=a-HuIgG_0.03                      | feature_id[1].value <= threshold=19665.666015625     |
| node_79: feature_name=SARS.CoV.2.S1.mFcTag              | feature_id[0].value <= threshold=54010.166015625     |
| node_80: feature_name=SARS.CoV.2.S1+S2                  | feature_id[18].value <= threshold=48317.708984375    |
| node_81: feature_name=SARS.CoV.2.Spike.RBD.His.Bac      | feature_id[9].value > threshold=16347.4580078125     |
| node_111: feature_name=hCoV.NL63.S1                     | feature_id[5].value <= threshold=4866.533447265625   |
| node_112: feature_name=SARS.CoV.2.S1.mFcTag             | feature_id[0].value <= threshold=40690.80078125      |
| node_113: feature_name=a-HuIgM_0.30                     | feature_id[32].value > threshold=1087.5              |
| Class: healthcare workers 60–180 days after vaccination |                                                      |
|                                                         |                                                      |
| Rules_46                                                | passed counts:5                                      |
| node_0: feature_name=HuIgG_0.03                         | feature_id[44].value <= threshold=3298.333251953125  |
| node_1: feature_name=SARS.CoV.2.S1.mFcTag               | feature_id[0].value > threshold=5354.388916015625    |
| node_9: feature_name=HuIgM_0.03                         | feature_id[45].value > threshold=-80.66666793823242  |
| node_27: feature_name=HuIgM_0.03                        | feature_id[45].value <= threshold=61.33333206176758  |
| node_28: feature_name=a-HuIgG_0.30                      | feature_id[30].value > threshold=34878.66796875      |
| node_64: feature_name=a-HuIgG_0.03                      | feature_id[1].value > threshold=9340.3330078125      |
| node_68: feature_name=a-HuIgA_0.30                      | feature_id[27].value <= threshold=1918.1666870117188 |
| node_69: feature_name=SARS.CoV.2.Spike.RBD.rFc          | feature_id[7].value > threshold=20694.49951171875    |

|                                                         |                                                     |
|---------------------------------------------------------|-----------------------------------------------------|
| Class: healthcare workers 60–180 days after vaccination |                                                     |
|                                                         |                                                     |
| Rules_47                                                | passed counts:4                                     |
| node_0: feature_name=HuIgG_0.03                         | feature_id[44].value > threshold=3298.333251953125  |
| node_78: feature_name=a-HuIgG_0.03                      | feature_id[1].value > threshold=19665.666015625     |
| node_360: feature_name=HuIgM_0.03                       | feature_id[45].value > threshold=-189.0             |
| node_366: feature_name=HuIgM_0.30                       | feature_id[13].value <= threshold=441.8333282470703 |
| Class: healthcare workers 60–180 days after vaccination |                                                     |
|                                                         |                                                     |
| Rules_48                                                | passed counts:4                                     |
| node_0: feature_name=HuIgG_0.03                         | feature_id[44].value > threshold=3298.333251953125  |
| node_78: feature_name=a-HuIgG_0.03                      | feature_id[1].value <= threshold=19665.666015625    |
| node_79: feature_name=SARS.CoV.2.S1.mFcTag              | feature_id[0].value > threshold=54010.166015625     |
| node_297: feature_name=a-MoIgG_0.10                     | feature_id[38].value > threshold=2382.8333740234375 |
| node_303: feature_name=SARS.CoV.2.S1                    | feature_id[15].value <= threshold=51713.66796875    |
| node_304: feature_name=hCoV.HKU1.S1_AA1.760             | feature_id[8].value > threshold=16192.1669921875    |
| node_310: feature_name=a-HuIgM_0.10                     | feature_id[33].value > threshold=176.5              |
| node_314: feature_name=SARS.CoV.2.S1+S2                 | feature_id[18].value > threshold=50299.93359375     |
| node_318: feature_name=a-HuIgG_0.30                     | feature_id[30].value <= threshold=47587.833984375   |
| node_319: feature_name=MERS.CoV.S1.RBD.367.606.rFcTag   | feature_id[3].value > threshold=3945.61669921875    |
| node_323: feature_name=a-MoIgG_0.10                     | feature_id[38].value > threshold=6842.166748046875  |
| node_327: feature_name=SARS.CoV.2.S1.mFcTag             | feature_id[0].value <= threshold=54403.482421875    |
| node_328: feature_name=HuIgG_0.03                       | feature_id[44].value > threshold=5438.833251953125  |
| Class: healthcare workers 60–180 days after vaccination |                                                     |
|                                                         |                                                     |

|                                                         |                                                      |
|---------------------------------------------------------|------------------------------------------------------|
| Rules_49                                                | passed counts:4                                      |
| node_0: feature_name=HuIgG_0.03                         | feature_id[44].value > threshold=3298.333251953125   |
| node_78: feature_name=a-HuIgG_0.03                      | feature_id[1].value <= threshold=19665.666015625     |
| node_79: feature_name=SARS.CoV.2.S1.mFcTag              | feature_id[0].value > threshold=54010.166015625      |
| node_297: feature_name=a-MoIgG_0.10                     | feature_id[38].value > threshold=2382.8333740234375  |
| node_303: feature_name=SARS.CoV.2.S1                    | feature_id[15].value <= threshold=51713.66796875     |
| node_304: feature_name=hCoV.HKU1.S1_AA1.760             | feature_id[8].value <= threshold=16192.1669921875    |
| node_305: feature_name=a-HuIgM_0.03                     | feature_id[34].value <= threshold=20.666666984558105 |
| node_306: feature_name=a-HuIgM_0.03                     | feature_id[34].value > threshold=-3.000000238418579  |
| Class: healthcare workers 60–180 days after vaccination |                                                      |
|                                                         |                                                      |
| Rules_50                                                | passed counts:4                                      |
| node_0: feature_name=HuIgG_0.03                         | feature_id[44].value > threshold=3298.333251953125   |
| node_78: feature_name=a-HuIgG_0.03                      | feature_id[1].value <= threshold=19665.666015625     |
| node_79: feature_name=SARS.CoV.2.S1.mFcTag              | feature_id[0].value <= threshold=54010.166015625     |
| node_80: feature_name=SARS.CoV.2.S1+S2                  | feature_id[18].value > threshold=48317.708984375     |
| node_224: feature_name=a-MoIgG_0.10                     | feature_id[38].value > threshold=2066.8333129882812  |
| node_226: feature_name=HuIgM_0.30                       | feature_id[13].value > threshold=750.1666870117188   |
| node_238: feature_name=HuIgM_0.30                       | feature_id[13].value > threshold=760.3333435058594   |
| node_240: feature_name=hCoV.OC43.HE                     | feature_id[10].value > threshold=3879.75             |
| node_246: feature_name=a-HuIgA_0.30                     | feature_id[27].value > threshold=1379.8333740234375  |
| node_248: feature_name=Flu.H1N1.HA1                     | feature_id[26].value <= threshold=53891.083984375    |
| node_249: feature_name=MERS.CoV.S1.RBD.367.606.rFcTag   | feature_id[3].value > threshold=1486.7666625976562   |
| node_253: feature_name=HuIgM_0.03                       | feature_id[45].value <= threshold=-56.33333396911621 |
| node_254: feature_name=MoIgA_0.30                       | feature_id[46].value > threshold=900.1666564941406   |

|                                                         |                                                      |
|---------------------------------------------------------|------------------------------------------------------|
| node_258: feature_name=SARS.CoV.2.S1.mFcTag             | feature_id[0].value <= threshold=53346.333984375     |
| node_259: feature_name=SARS.CoV.2.S1                    | feature_id[15].value <= threshold=47301.333984375    |
| node_260: feature_name=a-MoIgM_0.03                     | feature_id[41].value > threshold=127.16666793823242  |
| node_262: feature_name=hCoV.OC43.HE                     | feature_id[10].value <= threshold=12272.5166015625   |
| node_263: feature_name=SARS.CoV.2.S1+S2                 | feature_id[18].value > threshold=49907.841796875     |
| node_265: feature_name=a-MoIgG_0.10                     | feature_id[38].value <= threshold=23887.5            |
| Class: healthcare workers 60–180 days after vaccination |                                                      |
|                                                         |                                                      |
| Rules_51                                                | passed counts:4                                      |
| node_0: feature_name=HuIgG_0.03                         | feature_id[44].value > threshold=3298.333251953125   |
| node_78: feature_name=a-HuIgG_0.03                      | feature_id[1].value <= threshold=19665.666015625     |
| node_79: feature_name=SARS.CoV.2.S1.mFcTag              | feature_id[0].value <= threshold=54010.166015625     |
| node_80: feature_name=SARS.CoV.2.S1+S2                  | feature_id[18].value > threshold=48317.708984375     |
| node_224: feature_name=a-MoIgG_0.10                     | feature_id[38].value > threshold=2066.8333129882812  |
| node_226: feature_name=HuIgM_0.30                       | feature_id[13].value > threshold=750.1666870117188   |
| node_238: feature_name=HuIgM_0.30                       | feature_id[13].value > threshold=760.3333435058594   |
| node_240: feature_name=hCoV.OC43.HE                     | feature_id[10].value > threshold=3879.75             |
| node_246: feature_name=a-HuIgA_0.30                     | feature_id[27].value > threshold=1379.8333740234375  |
| node_248: feature_name=Flu.H1N1.HA1                     | feature_id[26].value <= threshold=53891.083984375    |
| node_249: feature_name=MERS.CoV.S1.RBD.367.606.rFcTag   | feature_id[3].value > threshold=1486.7666625976562   |
| node_253: feature_name=HuIgM_0.03                       | feature_id[45].value <= threshold=-56.33333396911621 |
| node_254: feature_name=MoIgA_0.30                       | feature_id[46].value > threshold=900.1666564941406   |
| node_258: feature_name=SARS.CoV.2.S1.mFcTag             | feature_id[0].value <= threshold=53346.333984375     |
| node_259: feature_name=SARS.CoV.2.S1                    | feature_id[15].value <= threshold=47301.333984375    |
| node_260: feature_name=a-MoIgM_0.03                     | feature_id[41].value > threshold=127.16666793823242  |

|                                                            |                                                     |
|------------------------------------------------------------|-----------------------------------------------------|
| node_262: feature_name=hCoV.OC43.HE                        | feature_id[10].value <= threshold=12272.5166015625  |
| node_263: feature_name=SARS.CoV.2.S1+S2                    | feature_id[18].value <= threshold=49907.841796875   |
| Class: healthcare workers within 60 days after vaccination |                                                     |
|                                                            |                                                     |
| Rules_52                                                   | passed counts:4                                     |
| node_0: feature_name=HuIgG_0.03                            | feature_id[44].value > threshold=3298.333251953125  |
| node_78: feature_name=a-HuIgG_0.03                         | feature_id[1].value <= threshold=19665.666015625    |
| node_79: feature_name=SARS.CoV.2.S1.mFcTag                 | feature_id[0].value <= threshold=54010.166015625    |
| node_80: feature_name=SARS.CoV.2.S1+S2                     | feature_id[18].value > threshold=48317.708984375    |
| node_224: feature_name=a-MoIgG_0.10                        | feature_id[38].value > threshold=2066.8333129882812 |
| node_226: feature_name=HuIgM_0.30                          | feature_id[13].value > threshold=750.1666870117188  |
| node_238: feature_name=HuIgM_0.30                          | feature_id[13].value > threshold=760.3333435058594  |
| node_240: feature_name=hCoV.OC43.HE                        | feature_id[10].value <= threshold=3879.75           |
| node_241: feature_name=a-HuIgM_0.10                        | feature_id[33].value <= threshold=899.8333435058594 |
| Class: healthcare workers within 60 days after vaccination |                                                     |
|                                                            |                                                     |
| Rules_53                                                   | passed counts:4                                     |
| node_0: feature_name=HuIgG_0.03                            | feature_id[44].value > threshold=3298.333251953125  |
| node_78: feature_name=a-HuIgG_0.03                         | feature_id[1].value <= threshold=19665.666015625    |
| node_79: feature_name=SARS.CoV.2.S1.mFcTag                 | feature_id[0].value <= threshold=54010.166015625    |
| node_80: feature_name=SARS.CoV.2.S1+S2                     | feature_id[18].value <= threshold=48317.708984375   |
| node_81: feature_name=SARS.CoV.2.Spike.RBD.His.Bac         | feature_id[9].value > threshold=16347.4580078125    |
| node_111: feature_name=hCoV.NL63.S1                        | feature_id[5].value > threshold=4866.533447265625   |
| node_123: feature_name=MERS.CoV.S1.RBD.367.606.rFcTag      | feature_id[3].value > threshold=2789.3416748046875  |
| node_161: feature_name=SARS.CoV.S1.HisTag                  | feature_id[14].value > threshold=4926.39990234375   |

|                                                         |                                                    |
|---------------------------------------------------------|----------------------------------------------------|
| node_179: feature_name=hCoV.HKU1.S1_S2                  | feature_id[22].value > threshold=48084.783203125   |
| node_217: feature_name=MoIgA_0.30                       | feature_id[46].value <= threshold=24299.6669921875 |
| node_218: feature_name=DcCoV.HKU23.NP                   | feature_id[21].value <= threshold=20749.25         |
| node_219: feature_name=DcCoV.HKU23.NP                   | feature_id[21].value > threshold=13731.44140625    |
| Class: healthcare workers 60–180 days after vaccination |                                                    |
|                                                         |                                                    |
| Rules_54                                                | passed counts:4                                    |
| node_0: feature_name=HuIgG_0.03                         | feature_id[44].value > threshold=3298.333251953125 |
| node_78: feature_name=a-HuIgG_0.03                      | feature_id[1].value <= threshold=19665.666015625   |
| node_79: feature_name=SARS.CoV.2.S1.mFcTag              | feature_id[0].value <= threshold=54010.166015625   |
| node_80: feature_name=SARS.CoV.2.S1+S2                  | feature_id[18].value <= threshold=48317.708984375  |
| node_81: feature_name=SARS.CoV.2.Spike.RBD.His.Bac      | feature_id[9].value > threshold=16347.4580078125   |
| node_111: feature_name=hCoV.NL63.S1                     | feature_id[5].value > threshold=4866.533447265625  |
| node_123: feature_name=MERS.CoV.S1.RBD.367.606.rFcTag   | feature_id[3].value > threshold=2789.3416748046875 |
| node_161: feature_name=SARS.CoV.S1.HisTag               | feature_id[14].value > threshold=4926.39990234375  |
| node_179: feature_name=hCoV.HKU1.S1_S2                  | feature_id[22].value <= threshold=48084.783203125  |
| node_180: feature_name=SARS.CoV.2.Spike.RBD.His.Bac     | feature_id[9].value <= threshold=31607.125         |
| node_181: feature_name=SARS.CoV.2.S1                    | feature_id[15].value > threshold=33718.333984375   |
| node_191: feature_name=a-HuIgA_0.30                     | feature_id[27].value <= threshold=1819.5           |
| Class: healthcare workers 60–180 days after vaccination |                                                    |
|                                                         |                                                    |
| Rules_55                                                | passed counts:4                                    |
| node_0: feature_name=HuIgG_0.03                         | feature_id[44].value > threshold=3298.333251953125 |
| node_78: feature_name=a-HuIgG_0.03                      | feature_id[1].value <= threshold=19665.666015625   |
| node_79: feature_name=SARS.CoV.2.S1.mFcTag              | feature_id[0].value <= threshold=54010.166015625   |

|                                                         |                                                      |
|---------------------------------------------------------|------------------------------------------------------|
| node_80: feature_name=SARS.CoV.2.S1+S2                  | feature_id[18].value <= threshold=48317.708984375    |
| node_81: feature_name=SARS.CoV.2.Spike.RBD.His.Bac      | feature_id[9].value > threshold=16347.4580078125     |
| node_111: feature_name=hCoV.NL63.S1                     | feature_id[5].value > threshold=4866.533447265625    |
| node_123: feature_name=MERS.CoV.S1.RBD.367.606.rFcTag   | feature_id[3].value > threshold=2789.3416748046875   |
| node_161: feature_name=SARS.CoV.S1.HisTag               | feature_id[14].value <= threshold=4926.39990234375   |
| node_162: feature_name=a-MoIgA_0.10                     | feature_id[36].value <= threshold=3108.3333740234375 |
| node_163: feature_name=Flu.B_Mal/.HA1+HA2               | feature_id[25].value > threshold=38684.7265625       |
| node_167: feature_name=SARS.CoV.NP                      | feature_id[19].value <= threshold=18293.6826171875   |
| node_168: feature_name=a-HuIgG_0.03                     | feature_id[1].value <= threshold=10603.0             |
| node_169: feature_name=a-HuIgM_0.10                     | feature_id[33].value <= threshold=483.1666717529297  |
| Class: healthcare workers 60–180 days after vaccination |                                                      |
|                                                         |                                                      |
| Rules_56                                                | passed counts:4                                      |
| node_0: feature_name=HuIgG_0.03                         | feature_id[44].value > threshold=3298.333251953125   |
| node_78: feature_name=a-HuIgG_0.03                      | feature_id[1].value <= threshold=19665.666015625     |
| node_79: feature_name=SARS.CoV.2.S1.mFcTag              | feature_id[0].value <= threshold=54010.166015625     |
| node_80: feature_name=SARS.CoV.2.S1+S2                  | feature_id[18].value <= threshold=48317.708984375    |
| node_81: feature_name=SARS.CoV.2.Spike.RBD.His.Bac      | feature_id[9].value > threshold=16347.4580078125     |
| node_111: feature_name=hCoV.NL63.S1                     | feature_id[5].value > threshold=4866.533447265625    |
| node_123: feature_name=MERS.CoV.S1.RBD.367.606.rFcTag   | feature_id[3].value <= threshold=2789.3416748046875  |
| node_124: feature_name=SARS.CoV.2.S1+S2                 | feature_id[18].value > threshold=41798.25            |
| node_140: feature_name=SARS.CoV.2.S1.RBD.mFc            | feature_id[17].value <= threshold=44491.166015625    |
| node_141: feature_name=a-HuIgM_0.03                     | feature_id[34].value > threshold=-6.833333492279053  |
| node_149: feature_name=a-MoIgA_0.30                     | feature_id[35].value > threshold=935.3333435058594   |
| node_151: feature_name=HuIgM_0.30                       | feature_id[13].value > threshold=1110.5              |

|                                                            |                                                      |
|------------------------------------------------------------|------------------------------------------------------|
| node_157: feature_name=a-MoIgA_0.30                        | feature_id[35].value > threshold=2098.6666259765625  |
| Class: healthcare workers within 60 days after vaccination |                                                      |
|                                                            |                                                      |
| Rules_57                                                   | passed counts:4                                      |
| node_0: feature_name=HuIgG_0.03                            | feature_id[44].value > threshold=3298.333251953125   |
| node_78: feature_name=a-HuIgG_0.03                         | feature_id[1].value <= threshold=19665.666015625     |
| node_79: feature_name=SARS.CoV.2.S1.mFcTag                 | feature_id[0].value <= threshold=54010.166015625     |
| node_80: feature_name=SARS.CoV.2.S1+S2                     | feature_id[18].value <= threshold=48317.708984375    |
| node_81: feature_name=SARS.CoV.2.Spike.RBD.His.Bac         | feature_id[9].value <= threshold=16347.4580078125    |
| node_82: feature_name=SARS.CoV.2.S1                        | feature_id[15].value <= threshold=2844.6334228515625 |
| node_83: feature_name=SARS.CoV.2.S1+S2                     | feature_id[18].value <= threshold=3298.25            |
| node_84: feature_name=hCoV.OC43.HE                         | feature_id[10].value > threshold=-45.900001525878906 |
| Class: healthcare workers within 60 days after vaccination |                                                      |
|                                                            |                                                      |
| Rules_58                                                   | passed counts:3                                      |
| node_0: feature_name=HuIgG_0.03                            | feature_id[44].value > threshold=3298.333251953125   |
| node_78: feature_name=a-HuIgG_0.03                         | feature_id[1].value <= threshold=19665.666015625     |
| node_79: feature_name=SARS.CoV.2.S1.mFcTag                 | feature_id[0].value > threshold=54010.166015625      |
| node_297: feature_name=a-MoIgG_0.10                        | feature_id[38].value > threshold=2382.8333740234375  |
| node_303: feature_name=SARS.CoV.2.S1                       | feature_id[15].value > threshold=51713.66796875      |
| node_345: feature_name=SARS.CoV.2.S1.HisTag                | feature_id[16].value > threshold=51766.75            |
| node_347: feature_name=HuIgA_0.03                          | feature_id[43].value > threshold=-60.33333396911621  |
| node_353: feature_name=SARS.CoV.2.Spike.RBD.His.Bac        | feature_id[9].value > threshold=51551.166015625      |
| node_357: feature_name=SARS.CoV.S1.HisTag                  | feature_id[14].value > threshold=37552.33203125      |
| Class: healthcare workers within 60 days after vaccination |                                                      |



|                                                         |                                                      |
|---------------------------------------------------------|------------------------------------------------------|
| Rules_59                                                | passed counts:3                                      |
| node_0: feature_name=HuIgG_0.03                         | feature_id[44].value > threshold=3298.333251953125   |
| node_78: feature_name=a-HuIgG_0.03                      | feature_id[1].value <= threshold=19665.666015625     |
| node_79: feature_name=SARS.CoV.2.S1.mFcTag              | feature_id[0].value > threshold=54010.166015625      |
| node_297: feature_name=a-MoIgG_0.10                     | feature_id[38].value > threshold=2382.8333740234375  |
| node_303: feature_name=SARS.CoV.2.S1                    | feature_id[15].value > threshold=51713.66796875      |
| node_345: feature_name=SARS.CoV.2.S1.HisTag             | feature_id[16].value > threshold=51766.75            |
| node_347: feature_name=HuIgA_0.03                       | feature_id[43].value > threshold=-60.33333396911621  |
| node_353: feature_name=SARS.CoV.2.Spike.RBD.His.Bac     | feature_id[9].value > threshold=51551.166015625      |
| node_357: feature_name=SARS.CoV.S1.HisTag               | feature_id[14].value <= threshold=37552.33203125     |
| Class: healthcare workers 60–180 days after vaccination |                                                      |
| Rules_60                                                | passed counts:3                                      |
| node_0: feature_name=HuIgG_0.03                         | feature_id[44].value > threshold=3298.333251953125   |
| node_78: feature_name=a-HuIgG_0.03                      | feature_id[1].value <= threshold=19665.666015625     |
| node_79: feature_name=SARS.CoV.2.S1.mFcTag              | feature_id[0].value > threshold=54010.166015625      |
| node_297: feature_name=a-MoIgG_0.10                     | feature_id[38].value > threshold=2382.8333740234375  |
| node_303: feature_name=SARS.CoV.2.S1                    | feature_id[15].value > threshold=51713.66796875      |
| node_345: feature_name=SARS.CoV.2.S1.HisTag             | feature_id[16].value > threshold=51766.75            |
| node_347: feature_name=HuIgA_0.03                       | feature_id[43].value <= threshold=-60.33333396911621 |
| node_348: feature_name=hCoV.HKU1.S1_S2                  | feature_id[22].value <= threshold=51287.134765625    |
| Class: healthcare workers 60–180 days after vaccination |                                                      |
| Rules_61                                                | passed counts:3                                      |

|                                                            |                                                     |
|------------------------------------------------------------|-----------------------------------------------------|
| node_0: feature_name=HuIgG_0.03                            | feature_id[44].value > threshold=3298.333251953125  |
| node_78: feature_name=a-HuIgG_0.03                         | feature_id[1].value <= threshold=19665.666015625    |
| node_79: feature_name=SARS.CoV.2.S1.mFcTag                 | feature_id[0].value > threshold=54010.166015625     |
| node_297: feature_name=a-MoIgG_0.10                        | feature_id[38].value > threshold=2382.8333740234375 |
| node_303: feature_name=SARS.CoV.2.S1                       | feature_id[15].value > threshold=51713.66796875     |
| node_345: feature_name=SARS.CoV.2.S1.HisTag                | feature_id[16].value <= threshold=51766.75          |
| Class: healthcare workers 60–180 days after vaccination    |                                                     |
|                                                            |                                                     |
| Rules_62                                                   | passed counts:3                                     |
| node_0: feature_name=HuIgG_0.03                            | feature_id[44].value > threshold=3298.333251953125  |
| node_78: feature_name=a-HuIgG_0.03                         | feature_id[1].value <= threshold=19665.666015625    |
| node_79: feature_name=SARS.CoV.2.S1.mFcTag                 | feature_id[0].value > threshold=54010.166015625     |
| node_297: feature_name=a-MoIgG_0.10                        | feature_id[38].value > threshold=2382.8333740234375 |
| node_303: feature_name=SARS.CoV.2.S1                       | feature_id[15].value <= threshold=51713.66796875    |
| node_304: feature_name=hCoV.HKU1.S1_AA1.760                | feature_id[8].value > threshold=16192.1669921875    |
| node_310: feature_name=a-HuIgM_0.10                        | feature_id[33].value > threshold=176.5              |
| node_314: feature_name=SARS.CoV.2.S1+S2                    | feature_id[18].value > threshold=50299.93359375     |
| node_318: feature_name=a-HuIgG_0.30                        | feature_id[30].value > threshold=47587.833984375    |
| node_336: feature_name=hCoV.HKU1.S1_AA1.760                | feature_id[8].value > threshold=45964.3828125       |
| node_342: feature_name=a-HuIgG_0.03                        | feature_id[1].value > threshold=13373.1669921875    |
| Class: healthcare workers within 60 days after vaccination |                                                     |
|                                                            |                                                     |
| Rules_63                                                   | passed counts:3                                     |
| node_0: feature_name=HuIgG_0.03                            | feature_id[44].value > threshold=3298.333251953125  |
| node_78: feature_name=a-HuIgG_0.03                         | feature_id[1].value <= threshold=19665.666015625    |

|                                                         |                                                      |
|---------------------------------------------------------|------------------------------------------------------|
| node_79: feature_name=SARS.CoV.2.S1.mFcTag              | feature_id[0].value > threshold=54010.166015625      |
| node_297: feature_name=a-MoIgG_0.10                     | feature_id[38].value > threshold=2382.8333740234375  |
| node_303: feature_name=SARS.CoV.2.S1                    | feature_id[15].value <= threshold=51713.66796875     |
| node_304: feature_name=hCoV.HKU1.S1_AA1.760             | feature_id[8].value > threshold=16192.1669921875     |
| node_310: feature_name=a-HuIgM_0.10                     | feature_id[33].value > threshold=176.5               |
| node_314: feature_name=SARS.CoV.2.S1+S2                 | feature_id[18].value > threshold=50299.93359375      |
| node_318: feature_name=a-HuIgG_0.30                     | feature_id[30].value <= threshold=47587.833984375    |
| node_319: feature_name=MERS.CoV.S1.RBD.367.606.rFcTag   | feature_id[3].value <= threshold=3945.61669921875    |
| node_320: feature_name=Flu.H1N1.HA1                     | feature_id[26].value > threshold=52361.833984375     |
| Class: healthcare workers 60–180 days after vaccination |                                                      |
|                                                         |                                                      |
| Rules_64                                                | passed counts:3                                      |
| node_0: feature_name=HuIgG_0.03                         | feature_id[44].value > threshold=3298.333251953125   |
| node_78: feature_name=a-HuIgG_0.03                      | feature_id[1].value <= threshold=19665.666015625     |
| node_79: feature_name=SARS.CoV.2.S1.mFcTag              | feature_id[0].value > threshold=54010.166015625      |
| node_297: feature_name=a-MoIgG_0.10                     | feature_id[38].value > threshold=2382.8333740234375  |
| node_303: feature_name=SARS.CoV.2.S1                    | feature_id[15].value <= threshold=51713.66796875     |
| node_304: feature_name=hCoV.HKU1.S1_AA1.760             | feature_id[8].value > threshold=16192.1669921875     |
| node_310: feature_name=a-HuIgM_0.10                     | feature_id[33].value <= threshold=176.5              |
| node_311: feature_name=a-HuIgM_0.03                     | feature_id[34].value <= threshold=-86.66666793823242 |
| Class: healthcare workers 60–180 days after vaccination |                                                      |
|                                                         |                                                      |
| Rules_65                                                | passed counts:3                                      |
| node_0: feature_name=HuIgG_0.03                         | feature_id[44].value > threshold=3298.333251953125   |
| node_78: feature_name=a-HuIgG_0.03                      | feature_id[1].value <= threshold=19665.666015625     |

|                                                            |                                                      |
|------------------------------------------------------------|------------------------------------------------------|
| node_79: feature_name=SARS.CoV.2.S1.mFcTag                 | feature_id[0].value > threshold=54010.166015625      |
| node_297: feature_name=a-MoIgG_0.10                        | feature_id[38].value > threshold=2382.8333740234375  |
| node_303: feature_name=SARS.CoV.2.S1                       | feature_id[15].value <= threshold=51713.66796875     |
| node_304: feature_name=hCoV.HKU1.S1_AA1.760                | feature_id[8].value <= threshold=16192.1669921875    |
| node_305: feature_name=a-HuIgM_0.03                        | feature_id[34].value <= threshold=20.666666984558105 |
| node_306: feature_name=a-HuIgM_0.03                        | feature_id[34].value <= threshold=-3.000000238418579 |
| Class: healthcare workers within 60 days after vaccination |                                                      |
|                                                            |                                                      |
| Rules_66                                                   | passed counts:3                                      |
| node_0: feature_name=HuIgG_0.03                            | feature_id[44].value > threshold=3298.333251953125   |
| node_78: feature_name=a-HuIgG_0.03                         | feature_id[1].value <= threshold=19665.666015625     |
| node_79: feature_name=SARS.CoV.2.S1.mFcTag                 | feature_id[0].value <= threshold=54010.166015625     |
| node_80: feature_name=SARS.CoV.2.S1+S2                     | feature_id[18].value > threshold=48317.708984375     |
| node_224: feature_name=a-MoIgG_0.10                        | feature_id[38].value > threshold=2066.8333129882812  |
| node_226: feature_name=HuIgM_0.30                          | feature_id[13].value > threshold=750.1666870117188   |
| node_238: feature_name=HuIgM_0.30                          | feature_id[13].value > threshold=760.3333435058594   |
| node_240: feature_name=hCoV.OC43.HE                        | feature_id[10].value > threshold=3879.75             |
| node_246: feature_name=a-HuIgA_0.30                        | feature_id[27].value > threshold=1379.8333740234375  |
| node_248: feature_name=Flu.H1N1.HA1                        | feature_id[26].value <= threshold=53891.083984375    |
| node_249: feature_name=MERS.CoV.S1.RBD.367.606.rFcTag      | feature_id[3].value > threshold=1486.7666625976562   |
| node_253: feature_name=HuIgM_0.03                          | feature_id[45].value > threshold=-56.33333396911621  |
| node_279: feature_name=hCoV.229E.S1                        | feature_id[2].value <= threshold=51743.583984375     |
| node_280: feature_name=Flu.B_Mal/.HA1                      | feature_id[4].value <= threshold=48206.833984375     |
| node_281: feature_name=a-MoIgM_0.10                        | feature_id[40].value > threshold=989.5000305175781   |
| node_285: feature_name=HuIgM_0.30                          | feature_id[13].value > threshold=2008.3333129882812  |

|                                                            |                                                      |
|------------------------------------------------------------|------------------------------------------------------|
| node_287: feature_name=SARS.CoV.2.S1.RBD.mFc               | feature_id[17].value > threshold=43325.44921875      |
| Class: healthcare workers within 60 days after vaccination |                                                      |
|                                                            |                                                      |
| Rules_67                                                   | passed counts:3                                      |
| node_0: feature_name=HuIgG_0.03                            | feature_id[44].value > threshold=3298.333251953125   |
| node_78: feature_name=a-HuIgG_0.03                         | feature_id[1].value <= threshold=19665.666015625     |
| node_79: feature_name=SARS.CoV.2.S1.mFcTag                 | feature_id[0].value <= threshold=54010.166015625     |
| node_80: feature_name=SARS.CoV.2.S1+S2                     | feature_id[18].value > threshold=48317.708984375     |
| node_224: feature_name=a-MoIgG_0.10                        | feature_id[38].value > threshold=2066.8333129882812  |
| node_226: feature_name=HuIgM_0.30                          | feature_id[13].value > threshold=750.1666870117188   |
| node_238: feature_name=HuIgM_0.30                          | feature_id[13].value > threshold=760.3333435058594   |
| node_240: feature_name=hCoV.OC43.HE                        | feature_id[10].value > threshold=3879.75             |
| node_246: feature_name=a-HuIgA_0.30                        | feature_id[27].value > threshold=1379.8333740234375  |
| node_248: feature_name=Flu.H1N1.HA1                        | feature_id[26].value <= threshold=53891.083984375    |
| node_249: feature_name=MERS.CoV.S1.RBD.367.606.rFcTag      | feature_id[3].value > threshold=1486.7666625976562   |
| node_253: feature_name=HuIgM_0.03                          | feature_id[45].value <= threshold=-56.33333396911621 |
| node_254: feature_name=MoIgA_0.30                          | feature_id[46].value > threshold=900.1666564941406   |
| node_258: feature_name=SARS.CoV.2.S1.mFcTag                | feature_id[0].value > threshold=53346.333984375      |
| node_272: feature_name=a-MoIgA_0.03                        | feature_id[37].value > threshold=2.3333334028720856  |
| node_274: feature_name=Flu.B_Mal/.HA1+HA2                  | feature_id[25].value > threshold=53981.70703125      |
| Class: healthcare workers within 60 days after vaccination |                                                      |
|                                                            |                                                      |
| Rules_68                                                   | passed counts:3                                      |
| node_0: feature_name=HuIgG_0.03                            | feature_id[44].value > threshold=3298.333251953125   |
| node_78: feature_name=a-HuIgG_0.03                         | feature_id[1].value <= threshold=19665.666015625     |

|                                                         |                                                      |
|---------------------------------------------------------|------------------------------------------------------|
| node_79: feature_name=SARS.CoV.2.S1.mFcTag              | feature_id[0].value <= threshold=54010.166015625     |
| node_80: feature_name=SARS.CoV.2.S1+S2                  | feature_id[18].value > threshold=48317.708984375     |
| node_224: feature_name=a-MoIgG_0.10                     | feature_id[38].value > threshold=2066.8333129882812  |
| node_226: feature_name=HuIgM_0.30                       | feature_id[13].value > threshold=750.1666870117188   |
| node_238: feature_name=HuIgM_0.30                       | feature_id[13].value > threshold=760.3333435058594   |
| node_240: feature_name=hCoV.OC43.HE                     | feature_id[10].value > threshold=3879.75             |
| node_246: feature_name=a-HuIgA_0.30                     | feature_id[27].value > threshold=1379.8333740234375  |
| node_248: feature_name=Flu.H1N1.HA1                     | feature_id[26].value <= threshold=53891.083984375    |
| node_249: feature_name=MERS.CoV.S1.RBD.367.606.rFcTag   | feature_id[3].value > threshold=1486.7666625976562   |
| node_253: feature_name=HuIgM_0.03                       | feature_id[45].value <= threshold=-56.33333396911621 |
| node_254: feature_name=MoIgA_0.30                       | feature_id[46].value > threshold=900.1666564941406   |
| node_258: feature_name=SARS.CoV.2.S1.mFcTag             | feature_id[0].value <= threshold=53346.333984375     |
| node_259: feature_name=SARS.CoV.2.S1                    | feature_id[15].value <= threshold=47301.333984375    |
| node_260: feature_name=a-MoIgM_0.03                     | feature_id[41].value <= threshold=127.16666793823242 |
| Class: healthcare workers 60–180 days after vaccination |                                                      |
|                                                         |                                                      |
| Rules_69                                                | passed counts:3                                      |
| node_0: feature_name=HuIgG_0.03                         | feature_id[44].value > threshold=3298.333251953125   |
| node_78: feature_name=a-HuIgG_0.03                      | feature_id[1].value <= threshold=19665.666015625     |
| node_79: feature_name=SARS.CoV.2.S1.mFcTag              | feature_id[0].value <= threshold=54010.166015625     |
| node_80: feature_name=SARS.CoV.2.S1+S2                  | feature_id[18].value > threshold=48317.708984375     |
| node_224: feature_name=a-MoIgG_0.10                     | feature_id[38].value > threshold=2066.8333129882812  |
| node_226: feature_name=HuIgM_0.30                       | feature_id[13].value > threshold=750.1666870117188   |
| node_238: feature_name=HuIgM_0.30                       | feature_id[13].value > threshold=760.3333435058594   |
| node_240: feature_name=hCoV.OC43.HE                     | feature_id[10].value > threshold=3879.75             |

|                                                         |                                                     |
|---------------------------------------------------------|-----------------------------------------------------|
| node_246: feature_name=a-HuIgA_0.30                     | feature_id[27].value > threshold=1379.8333740234375 |
| node_248: feature_name=Flu.H1N1.HA1                     | feature_id[26].value <= threshold=53891.083984375   |
| node_249: feature_name=MERS.CoV.S1.RBD.367.606.rFcTag   | feature_id[3].value <= threshold=1486.7666625976562 |
| node_250: feature_name=a-MoIgM_0.10                     | feature_id[40].value > threshold=1601.8333129882812 |
| Class: healthcare workers 60–180 days after vaccination |                                                     |
|                                                         |                                                     |
| Rules_70                                                | passed counts:3                                     |
| node_0: feature_name=HuIgG_0.03                         | feature_id[44].value > threshold=3298.333251953125  |
| node_78: feature_name=a-HuIgG_0.03                      | feature_id[1].value <= threshold=19665.666015625    |
| node_79: feature_name=SARS.CoV.2.S1.mFcTag              | feature_id[0].value <= threshold=54010.166015625    |
| node_80: feature_name=SARS.CoV.2.S1+S2                  | feature_id[18].value > threshold=48317.708984375    |
| node_224: feature_name=a-MoIgG_0.10                     | feature_id[38].value > threshold=2066.8333129882812 |
| node_226: feature_name=HuIgM_0.30                       | feature_id[13].value > threshold=750.1666870117188  |
| node_238: feature_name=HuIgM_0.30                       | feature_id[13].value <= threshold=760.3333435058594 |
| Class: healthcare workers 60–180 days after vaccination |                                                     |
|                                                         |                                                     |
| Rules_71                                                | passed counts:3                                     |
| node_0: feature_name=HuIgG_0.03                         | feature_id[44].value > threshold=3298.333251953125  |
| node_78: feature_name=a-HuIgG_0.03                      | feature_id[1].value <= threshold=19665.666015625    |
| node_79: feature_name=SARS.CoV.2.S1.mFcTag              | feature_id[0].value <= threshold=54010.166015625    |
| node_80: feature_name=SARS.CoV.2.S1+S2                  | feature_id[18].value > threshold=48317.708984375    |
| node_224: feature_name=a-MoIgG_0.10                     | feature_id[38].value > threshold=2066.8333129882812 |
| node_226: feature_name=HuIgM_0.30                       | feature_id[13].value <= threshold=750.1666870117188 |
| node_227: feature_name=SARS.CoV.S1.RBD.HisTag           | feature_id[20].value <= threshold=7585.25           |
| node_228: feature_name=MERS.CoV.S1.ECD.1-1297.HisTag    | feature_id[12].value > threshold=22314.0            |

|                                                            |                                                      |
|------------------------------------------------------------|------------------------------------------------------|
| node_230: feature_name=SARS.CoV.2.Spike.RBD.rFc            | feature_id[7].value > threshold=25894.986328125      |
| Class: healthcare workers 60–180 days after vaccination    |                                                      |
|                                                            |                                                      |
| Rules_72                                                   | passed counts:3                                      |
| node_0: feature_name=HuIgG_0.03                            | feature_id[44].value > threshold=3298.333251953125   |
| node_78: feature_name=a-HuIgG_0.03                         | feature_id[1].value <= threshold=19665.666015625     |
| node_79: feature_name=SARS.CoV.2.S1.mFcTag                 | feature_id[0].value <= threshold=54010.166015625     |
| node_80: feature_name=SARS.CoV.2.S1+S2                     | feature_id[18].value > threshold=48317.708984375     |
| node_224: feature_name=a-MoIgG_0.10                        | feature_id[38].value > threshold=2066.8333129882812  |
| node_226: feature_name=HuIgM_0.30                          | feature_id[13].value <= threshold=750.1666870117188  |
| node_227: feature_name=SARS.CoV.S1.RBD.HisTag              | feature_id[20].value <= threshold=7585.25            |
| node_228: feature_name=MERS.CoV.S1.ECD.1-1297.HisTag       | feature_id[12].value <= threshold=22314.0            |
| Class: healthcare workers within 60 days after vaccination |                                                      |
|                                                            |                                                      |
| Rules_73                                                   | passed counts:3                                      |
| node_0: feature_name=HuIgG_0.03                            | feature_id[44].value > threshold=3298.333251953125   |
| node_78: feature_name=a-HuIgG_0.03                         | feature_id[1].value <= threshold=19665.666015625     |
| node_79: feature_name=SARS.CoV.2.S1.mFcTag                 | feature_id[0].value <= threshold=54010.166015625     |
| node_80: feature_name=SARS.CoV.2.S1+S2                     | feature_id[18].value > threshold=48317.708984375     |
| node_224: feature_name=a-MoIgG_0.10                        | feature_id[38].value <= threshold=2066.8333129882812 |
| Class: healthcare workers over 180 days after vaccination  |                                                      |
|                                                            |                                                      |
| Rules_74                                                   | passed counts:3                                      |
| node_0: feature_name=HuIgG_0.03                            | feature_id[44].value > threshold=3298.333251953125   |
| node_78: feature_name=a-HuIgG_0.03                         | feature_id[1].value <= threshold=19665.666015625     |



|                                                            |                                                    |
|------------------------------------------------------------|----------------------------------------------------|
| node_79: feature_name=SARS.CoV.2.S1.mFcTag                 | feature_id[0].value <= threshold=54010.166015625   |
| node_80: feature_name=SARS.CoV.2.S1+S2                     | feature_id[18].value <= threshold=48317.708984375  |
| node_81: feature_name=SARS.CoV.2.Spike.RBD.His.Bac         | feature_id[9].value > threshold=16347.4580078125   |
| node_111: feature_name=hCoV.NL63.S1                        | feature_id[5].value > threshold=4866.533447265625  |
| node_123: feature_name=MERS.CoV.S1.RBD.367.606.rFcTag      | feature_id[3].value > threshold=2789.3416748046875 |
| node_161: feature_name=SARS.CoV.S1.HisTag                  | feature_id[14].value > threshold=4926.39990234375  |
| node_179: feature_name=hCoV.HKU1.S1_S2                     | feature_id[22].value > threshold=48084.783203125   |
| node_217: feature_name=MoIgA_0.30                          | feature_id[46].value > threshold=24299.6669921875  |
| Class: healthcare workers 60–180 days after vaccination    |                                                    |
|                                                            |                                                    |
| Rules_75                                                   | passed counts:3                                    |
| node_0: feature_name=HuIgG_0.03                            | feature_id[44].value > threshold=3298.333251953125 |
| node_78: feature_name=a-HuIgG_0.03                         | feature_id[1].value <= threshold=19665.666015625   |
| node_79: feature_name=SARS.CoV.2.S1.mFcTag                 | feature_id[0].value <= threshold=54010.166015625   |
| node_80: feature_name=SARS.CoV.2.S1+S2                     | feature_id[18].value <= threshold=48317.708984375  |
| node_81: feature_name=SARS.CoV.2.Spike.RBD.His.Bac         | feature_id[9].value > threshold=16347.4580078125   |
| node_111: feature_name=hCoV.NL63.S1                        | feature_id[5].value > threshold=4866.533447265625  |
| node_123: feature_name=MERS.CoV.S1.RBD.367.606.rFcTag      | feature_id[3].value > threshold=2789.3416748046875 |
| node_161: feature_name=SARS.CoV.S1.HisTag                  | feature_id[14].value > threshold=4926.39990234375  |
| node_179: feature_name=hCoV.HKU1.S1_S2                     | feature_id[22].value > threshold=48084.783203125   |
| node_217: feature_name=MoIgA_0.30                          | feature_id[46].value <= threshold=24299.6669921875 |
| node_218: feature_name=DcCoV.HKU23.NP                      | feature_id[21].value <= threshold=20749.25         |
| node_219: feature_name=DcCoV.HKU23.NP                      | feature_id[21].value <= threshold=13731.44140625   |
| Class: healthcare workers within 60 days after vaccination |                                                    |
|                                                            |                                                    |

|                                                            |                                                     |
|------------------------------------------------------------|-----------------------------------------------------|
| Rules_76                                                   | passed counts:3                                     |
| node_0: feature_name=HuIgG_0.03                            | feature_id[44].value > threshold=3298.333251953125  |
| node_78: feature_name=a-HuIgG_0.03                         | feature_id[1].value <= threshold=19665.666015625    |
| node_79: feature_name=SARS.CoV.2.S1.mFcTag                 | feature_id[0].value <= threshold=54010.166015625    |
| node_80: feature_name=SARS.CoV.2.S1+S2                     | feature_id[18].value <= threshold=48317.708984375   |
| node_81: feature_name=SARS.CoV.2.Spike.RBD.His.Bac         | feature_id[9].value > threshold=16347.4580078125    |
| node_111: feature_name=hCoV.NL63.S1                        | feature_id[5].value > threshold=4866.533447265625   |
| node_123: feature_name=MERS.CoV.S1.RBD.367.606.rFcTag      | feature_id[3].value > threshold=2789.3416748046875  |
| node_161: feature_name=SARS.CoV.S1.HisTag                  | feature_id[14].value > threshold=4926.39990234375   |
| node_179: feature_name=hCoV.HKU1.S1_S2                     | feature_id[22].value <= threshold=48084.783203125   |
| node_180: feature_name=SARS.CoV.2.Spike.RBD.His.Bac        | feature_id[9].value <= threshold=31607.125          |
| node_181: feature_name=SARS.CoV.2.S1                       | feature_id[15].value > threshold=33718.333984375    |
| node_191: feature_name=a-HuIgA_0.30                        | feature_id[27].value > threshold=1819.5             |
| node_193: feature_name=HuIgM_0.30                          | feature_id[13].value > threshold=1081.8333740234375 |
| node_197: feature_name=hCoV.HKU1.S1_S2                     | feature_id[22].value > threshold=44172.416015625    |
| Class: healthcare workers within 60 days after vaccination |                                                     |
|                                                            |                                                     |
| Rules_77                                                   | passed counts:3                                     |
| node_0: feature_name=HuIgG_0.03                            | feature_id[44].value > threshold=3298.333251953125  |
| node_78: feature_name=a-HuIgG_0.03                         | feature_id[1].value <= threshold=19665.666015625    |
| node_79: feature_name=SARS.CoV.2.S1.mFcTag                 | feature_id[0].value <= threshold=54010.166015625    |
| node_80: feature_name=SARS.CoV.2.S1+S2                     | feature_id[18].value <= threshold=48317.708984375   |
| node_81: feature_name=SARS.CoV.2.Spike.RBD.His.Bac         | feature_id[9].value > threshold=16347.4580078125    |
| node_111: feature_name=hCoV.NL63.S1                        | feature_id[5].value > threshold=4866.533447265625   |
| node_123: feature_name=MERS.CoV.S1.RBD.367.606.rFcTag      | feature_id[3].value > threshold=2789.3416748046875  |

|                                                            |                                                      |
|------------------------------------------------------------|------------------------------------------------------|
| node_161: feature_name=SARS.CoV.S1.HisTag                  | feature_id[14].value <= threshold=4926.39990234375   |
| node_162: feature_name=a-MoIgA_0.10                        | feature_id[36].value > threshold=3108.3333740234375  |
| Class: healthcare workers within 60 days after vaccination |                                                      |
|                                                            |                                                      |
| Rules_78                                                   | passed counts:3                                      |
| node_0: feature_name=HuIgG_0.03                            | feature_id[44].value > threshold=3298.333251953125   |
| node_78: feature_name=a-HuIgG_0.03                         | feature_id[1].value <= threshold=19665.666015625     |
| node_79: feature_name=SARS.CoV.2.S1.mFcTag                 | feature_id[0].value <= threshold=54010.166015625     |
| node_80: feature_name=SARS.CoV.2.S1+S2                     | feature_id[18].value <= threshold=48317.708984375    |
| node_81: feature_name=SARS.CoV.2.Spike.RBD.His.Bac         | feature_id[9].value > threshold=16347.4580078125     |
| node_111: feature_name=hCoV.NL63.S1                        | feature_id[5].value > threshold=4866.533447265625    |
| node_123: feature_name=MERS.CoV.S1.RBD.367.606.rFcTag      | feature_id[3].value > threshold=2789.3416748046875   |
| node_161: feature_name=SARS.CoV.S1.HisTag                  | feature_id[14].value <= threshold=4926.39990234375   |
| node_162: feature_name=a-MoIgA_0.10                        | feature_id[36].value <= threshold=3108.3333740234375 |
| node_163: feature_name=Flu.B_Mal/.HA1+HA2                  | feature_id[25].value > threshold=38684.7265625       |
| node_167: feature_name=SARS.CoV.NP                         | feature_id[19].value > threshold=18293.6826171875    |
| node_175: feature_name=Flu.B_Phu/.HA1                      | feature_id[11].value > threshold=37557.841796875     |
| Class: healthcare workers within 60 days after vaccination |                                                      |
|                                                            |                                                      |
| Rules_79                                                   | passed counts:3                                      |
| node_0: feature_name=HuIgG_0.03                            | feature_id[44].value > threshold=3298.333251953125   |
| node_78: feature_name=a-HuIgG_0.03                         | feature_id[1].value <= threshold=19665.666015625     |
| node_79: feature_name=SARS.CoV.2.S1.mFcTag                 | feature_id[0].value <= threshold=54010.166015625     |
| node_80: feature_name=SARS.CoV.2.S1+S2                     | feature_id[18].value <= threshold=48317.708984375    |
| node_81: feature_name=SARS.CoV.2.Spike.RBD.His.Bac         | feature_id[9].value > threshold=16347.4580078125     |

|                                                            |                                                      |
|------------------------------------------------------------|------------------------------------------------------|
| node_111: feature_name=hCoV.NL63.S1                        | feature_id[5].value > threshold=4866.533447265625    |
| node_123: feature_name=MERS.CoV.S1.RBD.367.606.rFcTag      | feature_id[3].value > threshold=2789.3416748046875   |
| node_161: feature_name=SARS.CoV.S1.HisTag                  | feature_id[14].value <= threshold=4926.39990234375   |
| node_162: feature_name=a-MoIgA_0.10                        | feature_id[36].value <= threshold=3108.3333740234375 |
| node_163: feature_name=Flu.B_Mal/.HA1+HA2                  | feature_id[25].value > threshold=38684.7265625       |
| node_167: feature_name=SARS.CoV.NP                         | feature_id[19].value <= threshold=18293.6826171875   |
| node_168: feature_name=a-HuIgG_0.03                        | feature_id[1].value <= threshold=10603.0             |
| node_169: feature_name=a-HuIgM_0.10                        | feature_id[33].value > threshold=483.1666717529297   |
| Class: healthcare workers within 60 days after vaccination |                                                      |
|                                                            |                                                      |
| Rules_80                                                   | passed counts:3                                      |
| node_0: feature_name=HuIgG_0.03                            | feature_id[44].value > threshold=3298.333251953125   |
| node_78: feature_name=a-HuIgG_0.03                         | feature_id[1].value <= threshold=19665.666015625     |
| node_79: feature_name=SARS.CoV.2.S1.mFcTag                 | feature_id[0].value <= threshold=54010.166015625     |
| node_80: feature_name=SARS.CoV.2.S1+S2                     | feature_id[18].value <= threshold=48317.708984375    |
| node_81: feature_name=SARS.CoV.2.Spike.RBD.His.Bac         | feature_id[9].value > threshold=16347.4580078125     |
| node_111: feature_name=hCoV.NL63.S1                        | feature_id[5].value > threshold=4866.533447265625    |
| node_123: feature_name=MERS.CoV.S1.RBD.367.606.rFcTag      | feature_id[3].value > threshold=2789.3416748046875   |
| node_161: feature_name=SARS.CoV.S1.HisTag                  | feature_id[14].value <= threshold=4926.39990234375   |
| node_162: feature_name=a-MoIgA_0.10                        | feature_id[36].value <= threshold=3108.3333740234375 |
| node_163: feature_name=Flu.B_Mal/.HA1+HA2                  | feature_id[25].value <= threshold=38684.7265625      |
| node_164: feature_name=a-MoIgA_0.30                        | feature_id[35].value <= threshold=7878.1668701171875 |
| Class: healthcare workers within 60 days after vaccination |                                                      |
|                                                            |                                                      |
| Rules_81                                                   | passed counts:3                                      |

|                                                         |                                                      |
|---------------------------------------------------------|------------------------------------------------------|
| node_0: feature_name=HuIgG_0.03                         | feature_id[44].value > threshold=3298.333251953125   |
| node_78: feature_name=a-HuIgG_0.03                      | feature_id[1].value <= threshold=19665.666015625     |
| node_79: feature_name=SARS.CoV.2.S1.mFcTag              | feature_id[0].value <= threshold=54010.166015625     |
| node_80: feature_name=SARS.CoV.2.S1+S2                  | feature_id[18].value <= threshold=48317.708984375    |
| node_81: feature_name=SARS.CoV.2.Spike.RBD.His.Bac      | feature_id[9].value > threshold=16347.4580078125     |
| node_111: feature_name=hCoV.NL63.S1                     | feature_id[5].value > threshold=4866.533447265625    |
| node_123: feature_name=MERS.CoV.S1.RBD.367.606.rFcTag   | feature_id[3].value <= threshold=2789.3416748046875  |
| node_124: feature_name=SARS.CoV.2.S1+S2                 | feature_id[18].value > threshold=41798.25            |
| node_140: feature_name=SARS.CoV.2.S1.RBD.mFc            | feature_id[17].value <= threshold=44491.166015625    |
| node_141: feature_name=a-HuIgM_0.03                     | feature_id[34].value > threshold=-6.833333492279053  |
| node_149: feature_name=a-MoIgA_0.30                     | feature_id[35].value > threshold=935.3333435058594   |
| node_151: feature_name=HuIgM_0.30                       | feature_id[13].value > threshold=1110.5              |
| node_157: feature_name=a-MoIgA_0.30                     | feature_id[35].value <= threshold=2098.6666259765625 |
| Class: healthcare workers 60–180 days after vaccination |                                                      |
|                                                         |                                                      |
| Rules_82                                                | passed counts:3                                      |
| node_0: feature_name=HuIgG_0.03                         | feature_id[44].value > threshold=3298.333251953125   |
| node_78: feature_name=a-HuIgG_0.03                      | feature_id[1].value <= threshold=19665.666015625     |
| node_79: feature_name=SARS.CoV.2.S1.mFcTag              | feature_id[0].value <= threshold=54010.166015625     |
| node_80: feature_name=SARS.CoV.2.S1+S2                  | feature_id[18].value <= threshold=48317.708984375    |
| node_81: feature_name=SARS.CoV.2.Spike.RBD.His.Bac      | feature_id[9].value > threshold=16347.4580078125     |
| node_111: feature_name=hCoV.NL63.S1                     | feature_id[5].value > threshold=4866.533447265625    |
| node_123: feature_name=MERS.CoV.S1.RBD.367.606.rFcTag   | feature_id[3].value <= threshold=2789.3416748046875  |
| node_124: feature_name=SARS.CoV.2.S1+S2                 | feature_id[18].value > threshold=41798.25            |
| node_140: feature_name=SARS.CoV.2.S1.RBD.mFc            | feature_id[17].value <= threshold=44491.166015625    |

|                                                            |                                                      |
|------------------------------------------------------------|------------------------------------------------------|
| node_141: feature_name=a-HuIgM_0.03                        | feature_id[34].value <= threshold=-6.833333492279053 |
| node_142: feature_name=hCoV.OC43.HE                        | feature_id[10].value <= threshold=7956.5             |
| Class: healthcare workers within 60 days after vaccination |                                                      |
|                                                            |                                                      |
| Rules_83                                                   | passed counts:3                                      |
| node_0: feature_name=HuIgG_0.03                            | feature_id[44].value > threshold=3298.333251953125   |
| node_78: feature_name=a-HuIgG_0.03                         | feature_id[1].value <= threshold=19665.666015625     |
| node_79: feature_name=SARS.CoV.2.S1.mFcTag                 | feature_id[0].value <= threshold=54010.166015625     |
| node_80: feature_name=SARS.CoV.2.S1+S2                     | feature_id[18].value <= threshold=48317.708984375    |
| node_81: feature_name=SARS.CoV.2.Spike.RBD.His.Bac         | feature_id[9].value > threshold=16347.4580078125     |
| node_111: feature_name=hCoV.NL63.S1                        | feature_id[5].value > threshold=4866.533447265625    |
| node_123: feature_name=MERS.CoV.S1.RBD.367.606.rFcTag      | feature_id[3].value <= threshold=2789.3416748046875  |
| node_124: feature_name=SARS.CoV.2.S1+S2                    | feature_id[18].value <= threshold=41798.25           |
| node_125: feature_name=hCoV.OC43.S1_S2ECD.HisTag           | feature_id[24].value > threshold=49554.1328125       |
| Class: healthcare workers over 180 days after vaccination  |                                                      |
|                                                            |                                                      |
| Rules_84                                                   | passed counts:3                                      |
| node_0: feature_name=HuIgG_0.03                            | feature_id[44].value > threshold=3298.333251953125   |
| node_78: feature_name=a-HuIgG_0.03                         | feature_id[1].value <= threshold=19665.666015625     |
| node_79: feature_name=SARS.CoV.2.S1.mFcTag                 | feature_id[0].value <= threshold=54010.166015625     |
| node_80: feature_name=SARS.CoV.2.S1+S2                     | feature_id[18].value <= threshold=48317.708984375    |
| node_81: feature_name=SARS.CoV.2.Spike.RBD.His.Bac         | feature_id[9].value > threshold=16347.4580078125     |
| node_111: feature_name=hCoV.NL63.S1                        | feature_id[5].value > threshold=4866.533447265625    |
| node_123: feature_name=MERS.CoV.S1.RBD.367.606.rFcTag      | feature_id[3].value <= threshold=2789.3416748046875  |
| node_124: feature_name=SARS.CoV.2.S1+S2                    | feature_id[18].value <= threshold=41798.25           |

|                                                         |                                                      |
|---------------------------------------------------------|------------------------------------------------------|
| node_125: feature_name=hCoV.OC43.S1_S2ECD.HisTag        | feature_id[24].value <= threshold=49554.1328125      |
| node_126: feature_name=SARS.CoV.2.Spike.RBD.His.Bac     | feature_id[9].value <= threshold=23295.4169921875    |
| node_127: feature_name=hCoV.OC43.S1_S2ECD.HisTag        | feature_id[24].value <= threshold=28407.0830078125   |
| Class: healthcare workers 60–180 days after vaccination |                                                      |
|                                                         |                                                      |
| Rules_85                                                | passed counts:3                                      |
| node_0: feature_name=HuIgG_0.03                         | feature_id[44].value > threshold=3298.333251953125   |
| node_78: feature_name=a-HuIgG_0.03                      | feature_id[1].value <= threshold=19665.666015625     |
| node_79: feature_name=SARS.CoV.2.S1.mFcTag              | feature_id[0].value <= threshold=54010.166015625     |
| node_80: feature_name=SARS.CoV.2.S1+S2                  | feature_id[18].value <= threshold=48317.708984375    |
| node_81: feature_name=SARS.CoV.2.Spike.RBD.His.Bac      | feature_id[9].value <= threshold=16347.4580078125    |
| node_82: feature_name=SARS.CoV.2.S1                     | feature_id[15].value > threshold=2844.6334228515625  |
| node_90: feature_name=a-MoIgG_0.10                      | feature_id[38].value > threshold=1482.3333129882812  |
| node_98: feature_name=Flu.H1N1.HA1                      | feature_id[26].value > threshold=52934.66015625      |
| node_108: feature_name=a-MoIgA_0.03                     | feature_id[37].value > threshold=26.999999046325684  |
| Class: unvaccinated healthcare workers                  |                                                      |
|                                                         |                                                      |
| Rules_86                                                | passed counts:3                                      |
| node_0: feature_name=HuIgG_0.03                         | feature_id[44].value > threshold=3298.333251953125   |
| node_78: feature_name=a-HuIgG_0.03                      | feature_id[1].value <= threshold=19665.666015625     |
| node_79: feature_name=SARS.CoV.2.S1.mFcTag              | feature_id[0].value <= threshold=54010.166015625     |
| node_80: feature_name=SARS.CoV.2.S1+S2                  | feature_id[18].value <= threshold=48317.708984375    |
| node_81: feature_name=SARS.CoV.2.Spike.RBD.His.Bac      | feature_id[9].value <= threshold=16347.4580078125    |
| node_82: feature_name=SARS.CoV.2.S1                     | feature_id[15].value > threshold=2844.6334228515625  |
| node_90: feature_name=a-MoIgG_0.10                      | feature_id[38].value <= threshold=1482.3333129882812 |

|                                                           |                                                     |
|-----------------------------------------------------------|-----------------------------------------------------|
| node_91: feature_name=SARS.CoV.2.Spike.RBD.rFc            | feature_id[7].value > threshold=6995.25             |
| Class: healthcare workers over 180 days after vaccination |                                                     |
|                                                           |                                                     |
| Rules_87                                                  | passed counts:3                                     |
| node_0: feature_name=HuIgG_0.03                           | feature_id[44].value <= threshold=3298.333251953125 |
| node_1: feature_name=SARS.CoV.2.S1.mFcTag                 | feature_id[0].value > threshold=5354.388916015625   |
| node_9: feature_name=HuIgM_0.03                           | feature_id[45].value > threshold=-80.66666793823242 |
| node_27: feature_name=HuIgM_0.03                          | feature_id[45].value <= threshold=61.33333206176758 |
| node_28: feature_name=a-HuIgG_0.30                        | feature_id[30].value > threshold=34878.66796875     |
| node_64: feature_name=a-HuIgG_0.03                        | feature_id[1].value <= threshold=9340.3330078125    |
| node_65: feature_name=SARS.CoV.2.Spike.RBD.His.Bac        | feature_id[9].value <= threshold=13221.6298828125   |
| Class: unvaccinated healthcare workers                    |                                                     |
|                                                           |                                                     |
| Rules_88                                                  | passed counts:3                                     |
| node_0: feature_name=HuIgG_0.03                           | feature_id[44].value <= threshold=3298.333251953125 |
| node_1: feature_name=SARS.CoV.2.S1.mFcTag                 | feature_id[0].value > threshold=5354.388916015625   |
| node_9: feature_name=HuIgM_0.03                           | feature_id[45].value > threshold=-80.66666793823242 |
| node_27: feature_name=HuIgM_0.03                          | feature_id[45].value <= threshold=61.33333206176758 |
| node_28: feature_name=a-HuIgG_0.30                        | feature_id[30].value <= threshold=34878.66796875    |
| node_29: feature_name=HuIgG_0.03                          | feature_id[44].value > threshold=769.8333435058594  |
| node_35: feature_name=SARS.CoV.S1.HisTag                  | feature_id[14].value > threshold=400.3000030517578  |
| node_39: feature_name=hCoV.HKU1.S1_S2                     | feature_id[22].value <= threshold=42662.666015625   |
| node_40: feature_name=Flu.B_Phu/.HA1                      | feature_id[11].value <= threshold=49118.416015625   |
| node_41: feature_name=hCoV.OC43.HE                        | feature_id[10].value <= threshold=25184.06640625    |
| node_42: feature_name=HuIgM_0.30                          | feature_id[13].value <= threshold=1223.5            |



|                                                         |                                                     |
|---------------------------------------------------------|-----------------------------------------------------|
| node_43: feature_name=a-HuIgA_0.03                      | feature_id[29].value > threshold=-59.66666603088379 |
| node_47: feature_name=SARS.CoV.S1.HisTag                | feature_id[14].value > threshold=25028.0            |
| node_53: feature_name=a-HuIgA_0.30                      | feature_id[27].value > threshold=976.3333435058594  |
| Class: healthcare workers 60–180 days after vaccination |                                                     |
|                                                         |                                                     |
| Rules_89                                                | passed counts:3                                     |
| node_0: feature_name=HuIgG_0.03                         | feature_id[44].value <= threshold=3298.333251953125 |
| node_1: feature_name=SARS.CoV.2.S1.mFcTag               | feature_id[0].value > threshold=5354.388916015625   |
| node_9: feature_name=HuIgM_0.03                         | feature_id[45].value > threshold=-80.66666793823242 |
| node_27: feature_name=HuIgM_0.03                        | feature_id[45].value <= threshold=61.33333206176758 |
| node_28: feature_name=a-HuIgG_0.30                      | feature_id[30].value <= threshold=34878.66796875    |
| node_29: feature_name=HuIgG_0.03                        | feature_id[44].value > threshold=769.8333435058594  |
| node_35: feature_name=SARS.CoV.S1.HisTag                | feature_id[14].value > threshold=400.3000030517578  |
| node_39: feature_name=hCoV.HKU1.S1_S2                   | feature_id[22].value <= threshold=42662.666015625   |
| node_40: feature_name=Flu.B_Phu/.HA1                    | feature_id[11].value <= threshold=49118.416015625   |
| node_41: feature_name=hCoV.OC43.HE                      | feature_id[10].value <= threshold=25184.06640625    |
| node_42: feature_name=HuIgM_0.30                        | feature_id[13].value <= threshold=1223.5            |
| node_43: feature_name=a-HuIgA_0.03                      | feature_id[29].value > threshold=-59.66666603088379 |
| node_47: feature_name=SARS.CoV.S1.HisTag                | feature_id[14].value <= threshold=25028.0           |
| node_48: feature_name=HuIgM_0.03                        | feature_id[45].value > threshold=35.33333206176758  |
| node_50: feature_name=Flu.H1N1.HA1                      | feature_id[26].value <= threshold=36011.291015625   |
| Class: healthcare workers 60–180 days after vaccination |                                                     |
|                                                         |                                                     |
| Rules_90                                                | passed counts:3                                     |
| node_0: feature_name=HuIgG_0.03                         | feature_id[44].value <= threshold=3298.333251953125 |

|                                                            |                                                      |
|------------------------------------------------------------|------------------------------------------------------|
| node_1: feature_name=SARS.CoV.2.S1.mFcTag                  | feature_id[0].value > threshold=5354.388916015625    |
| node_9: feature_name=HuIgM_0.03                            | feature_id[45].value <= threshold=-80.66666793823242 |
| node_10: feature_name=SARS.CoV.2.Spike.RBD.His.Bac         | feature_id[9].value > threshold=29393.55859375       |
| node_18: feature_name=Flu.B_Mal/.HA1                       | feature_id[4].value > threshold=38994.25             |
| node_20: feature_name=SARS.CoV.S1.HisTag                   | feature_id[14].value <= threshold=11923.35009765625  |
| node_21: feature_name=SARS.CoV.2.Spike.RBD.rFc             | feature_id[7].value > threshold=44823.91796875       |
| Class: healthcare workers 60–180 days after vaccination    |                                                      |
|                                                            |                                                      |
| Rules_91                                                   | passed counts:3                                      |
| node_0: feature_name=HuIgG_0.03                            | feature_id[44].value <= threshold=3298.333251953125  |
| node_1: feature_name=SARS.CoV.2.S1.mFcTag                  | feature_id[0].value <= threshold=5354.388916015625   |
| node_2: feature_name=SARS.CoV.2.S1.HisTag                  | feature_id[16].value > threshold=-383.86944580078125 |
| node_4: feature_name=hCoV.OC43.HE                          | feature_id[10].value <= threshold=414.5370330810547  |
| node_5: feature_name=SARS.CoV.2.S1.HisTag                  | feature_id[16].value > threshold=1.5555554628372192  |
| Class: unvaccinated healthcare workers                     |                                                      |
|                                                            |                                                      |
| Rules_92                                                   | passed counts:2                                      |
| node_0: feature_name=HuIgG_0.03                            | feature_id[44].value > threshold=3298.333251953125   |
| node_78: feature_name=a-HuIgG_0.03                         | feature_id[1].value > threshold=19665.666015625      |
| node_360: feature_name=HuIgM_0.03                          | feature_id[45].value > threshold=-189.0              |
| node_366: feature_name=HuIgM_0.30                          | feature_id[13].value > threshold=441.8333282470703   |
| node_368: feature_name=a-HuIgG_0.10                        | feature_id[31].value > threshold=32914.5             |
| node_372: feature_name=a-MoIgG_0.10                        | feature_id[38].value > threshold=20281.6669921875    |
| Class: healthcare workers within 60 days after vaccination |                                                      |
|                                                            |                                                      |

|                                                           |                                                      |
|-----------------------------------------------------------|------------------------------------------------------|
| Rules_93                                                  | passed counts:2                                      |
| node_0: feature_name=HuIgG_0.03                           | feature_id[44].value > threshold=3298.333251953125   |
| node_78: feature_name=a-HuIgG_0.03                        | feature_id[1].value > threshold=19665.666015625      |
| node_360: feature_name=HuIgM_0.03                         | feature_id[45].value > threshold=-189.0              |
| node_366: feature_name=HuIgM_0.30                         | feature_id[13].value > threshold=441.8333282470703   |
| node_368: feature_name=a-HuIgG_0.10                       | feature_id[31].value > threshold=32914.5             |
| node_372: feature_name=a-MoIgG_0.10                       | feature_id[38].value <= threshold=20281.6669921875   |
| node_373: feature_name=hCoV.229E.S1                       | feature_id[2].value > threshold=54372.5              |
| node_375: feature_name=hCoV.HKU1.S1_S2                    | feature_id[22].value > threshold=44467.44921875      |
| Class: healthcare workers 60–180 days after vaccination   |                                                      |
|                                                           |                                                      |
| Rules_94                                                  | passed counts:2                                      |
| node_0: feature_name=HuIgG_0.03                           | feature_id[44].value > threshold=3298.333251953125   |
| node_78: feature_name=a-HuIgG_0.03                        | feature_id[1].value > threshold=19665.666015625      |
| node_360: feature_name=HuIgM_0.03                         | feature_id[45].value > threshold=-189.0              |
| node_366: feature_name=HuIgM_0.30                         | feature_id[13].value > threshold=441.8333282470703   |
| node_368: feature_name=a-HuIgG_0.10                       | feature_id[31].value <= threshold=32914.5            |
| node_369: feature_name=MERS.CoV.S1.RBD.367.606.rFcTag     | feature_id[3].value > threshold=6711.89990234375     |
| Class: healthcare workers over 180 days after vaccination |                                                      |
|                                                           |                                                      |
| Rules_95                                                  | passed counts:2                                      |
| node_0: feature_name=HuIgG_0.03                           | feature_id[44].value > threshold=3298.333251953125   |
| node_78: feature_name=a-HuIgG_0.03                        | feature_id[1].value <= threshold=19665.666015625     |
| node_79: feature_name=SARS.CoV.2.S1.mFcTag                | feature_id[0].value > threshold=54010.166015625      |
| node_297: feature_name=a-MoIgG_0.10                       | feature_id[38].value <= threshold=2382.8333740234375 |

|                                                         |                                                     |
|---------------------------------------------------------|-----------------------------------------------------|
| node_298: feature_name=Flu.B_Mal/.HA1                   | feature_id[4].value <= threshold=41908.115234375    |
| node_299: feature_name=a-HuIgA_0.10                     | feature_id[28].value > threshold=164.00000381469727 |
| Class: healthcare workers 60–180 days after vaccination |                                                     |
|                                                         |                                                     |
| Rules_96                                                | passed counts:2                                     |
| node_0: feature_name=HuIgG_0.03                         | feature_id[44].value > threshold=3298.333251953125  |
| node_78: feature_name=a-HuIgG_0.03                      | feature_id[1].value <= threshold=19665.666015625    |
| node_79: feature_name=SARS.CoV.2.S1.mFcTag              | feature_id[0].value <= threshold=54010.166015625    |
| node_80: feature_name=SARS.CoV.2.S1+S2                  | feature_id[18].value > threshold=48317.708984375    |
| node_224: feature_name=a-MoIgG_0.10                     | feature_id[38].value > threshold=2066.8333129882812 |
| node_226: feature_name=HuIgM_0.30                       | feature_id[13].value > threshold=750.1666870117188  |
| node_238: feature_name=HuIgM_0.30                       | feature_id[13].value > threshold=760.3333435058594  |
| node_240: feature_name=hCoV.OC43.HE                     | feature_id[10].value > threshold=3879.75            |
| node_246: feature_name=a-HuIgA_0.30                     | feature_id[27].value > threshold=1379.8333740234375 |
| node_248: feature_name=Flu.H1N1.HA1                     | feature_id[26].value > threshold=53891.083984375    |
| Class: healthcare workers 60–180 days after vaccination |                                                     |
|                                                         |                                                     |
| Rules_97                                                | passed counts:2                                     |
| node_0: feature_name=HuIgG_0.03                         | feature_id[44].value > threshold=3298.333251953125  |
| node_78: feature_name=a-HuIgG_0.03                      | feature_id[1].value <= threshold=19665.666015625    |
| node_79: feature_name=SARS.CoV.2.S1.mFcTag              | feature_id[0].value <= threshold=54010.166015625    |
| node_80: feature_name=SARS.CoV.2.S1+S2                  | feature_id[18].value > threshold=48317.708984375    |
| node_224: feature_name=a-MoIgG_0.10                     | feature_id[38].value > threshold=2066.8333129882812 |
| node_226: feature_name=HuIgM_0.30                       | feature_id[13].value > threshold=750.1666870117188  |
| node_238: feature_name=HuIgM_0.30                       | feature_id[13].value > threshold=760.3333435058594  |

|                                                            |                                                      |
|------------------------------------------------------------|------------------------------------------------------|
| node_240: feature_name=hCoV.OC43.HE                        | feature_id[10].value > threshold=3879.75             |
| node_246: feature_name=a-HuIgA_0.30                        | feature_id[27].value > threshold=1379.8333740234375  |
| node_248: feature_name=Flu.H1N1.HA1                        | feature_id[26].value <= threshold=53891.083984375    |
| node_249: feature_name=MERS.CoV.S1.RBD.367.606.rFcTag      | feature_id[3].value > threshold=1486.7666625976562   |
| node_253: feature_name=HuIgM_0.03                          | feature_id[45].value > threshold=-56.33333396911621  |
| node_279: feature_name=hCoV.229E.S1                        | feature_id[2].value <= threshold=51743.583984375     |
| node_280: feature_name=Flu.B_Mal/.HA1                      | feature_id[4].value > threshold=48206.833984375      |
| node_290: feature_name=MERS.CoV.S1.ECD.1-1297.HisTag       | feature_id[12].value > threshold=25489.541015625     |
| Class: healthcare workers within 60 days after vaccination |                                                      |
|                                                            |                                                      |
| Rules_98                                                   | passed counts:2                                      |
| node_0: feature_name=HuIgG_0.03                            | feature_id[44].value > threshold=3298.333251953125   |
| node_78: feature_name=a-HuIgG_0.03                         | feature_id[1].value <= threshold=19665.666015625     |
| node_79: feature_name=SARS.CoV.2.S1.mFcTag                 | feature_id[0].value <= threshold=54010.166015625     |
| node_80: feature_name=SARS.CoV.2.S1+S2                     | feature_id[18].value > threshold=48317.708984375     |
| node_224: feature_name=a-MoIgG_0.10                        | feature_id[38].value > threshold=2066.8333129882812  |
| node_226: feature_name=HuIgM_0.30                          | feature_id[13].value > threshold=750.1666870117188   |
| node_238: feature_name=HuIgM_0.30                          | feature_id[13].value > threshold=760.3333435058594   |
| node_240: feature_name=hCoV.OC43.HE                        | feature_id[10].value > threshold=3879.75             |
| node_246: feature_name=a-HuIgA_0.30                        | feature_id[27].value <= threshold=1379.8333740234375 |
| Class: healthcare workers 60–180 days after vaccination    |                                                      |
|                                                            |                                                      |
| Rules_99                                                   | passed counts:2                                      |
| node_0: feature_name=HuIgG_0.03                            | feature_id[44].value > threshold=3298.333251953125   |
| node_78: feature_name=a-HuIgG_0.03                         | feature_id[1].value <= threshold=19665.666015625     |

|                                                            |                                                     |
|------------------------------------------------------------|-----------------------------------------------------|
| node_79: feature_name=SARS.CoV.2.S1.mFcTag                 | feature_id[0].value <= threshold=54010.166015625    |
| node_80: feature_name=SARS.CoV.2.S1+S2                     | feature_id[18].value > threshold=48317.708984375    |
| node_224: feature_name=a-MoIgG_0.10                        | feature_id[38].value > threshold=2066.8333129882812 |
| node_226: feature_name=HuIgM_0.30                          | feature_id[13].value > threshold=750.1666870117188  |
| node_238: feature_name=HuIgM_0.30                          | feature_id[13].value > threshold=760.3333435058594  |
| node_240: feature_name=hCoV.OC43.HE                        | feature_id[10].value <= threshold=3879.75           |
| node_241: feature_name=a-HuIgM_0.10                        | feature_id[33].value > threshold=899.8333435058594  |
| node_243: feature_name=HuIgA_0.10                          | feature_id[42].value <= threshold=138.1666717529297 |
| Class: healthcare workers within 60 days after vaccination |                                                     |
|                                                            |                                                     |
| Rules_100                                                  | passed counts:2                                     |
| node_0: feature_name=HuIgG_0.03                            | feature_id[44].value > threshold=3298.333251953125  |
| node_78: feature_name=a-HuIgG_0.03                         | feature_id[1].value <= threshold=19665.666015625    |
| node_79: feature_name=SARS.CoV.2.S1.mFcTag                 | feature_id[0].value <= threshold=54010.166015625    |
| node_80: feature_name=SARS.CoV.2.S1+S2                     | feature_id[18].value <= threshold=48317.708984375   |
| node_81: feature_name=SARS.CoV.2.Spike.RBD.His.Bac         | feature_id[9].value > threshold=16347.4580078125    |
| node_111: feature_name=hCoV.NL63.S1                        | feature_id[5].value > threshold=4866.533447265625   |
| node_123: feature_name=MERS.CoV.S1.RBD.367.606.rFcTag      | feature_id[3].value > threshold=2789.3416748046875  |
| node_161: feature_name=SARS.CoV.S1.HisTag                  | feature_id[14].value > threshold=4926.39990234375   |
| node_179: feature_name=hCoV.HKU1.S1_S2                     | feature_id[22].value <= threshold=48084.783203125   |
| node_180: feature_name=SARS.CoV.2.Spike.RBD.His.Bac        | feature_id[9].value > threshold=31607.125           |
| node_200: feature_name=SARS.CoV.2.S1.HisTag                | feature_id[16].value > threshold=43902.201171875    |
| node_214: feature_name=SARS.CoV.2.S1.mFcTag                | feature_id[0].value <= threshold=51362.833984375    |
| Class: healthcare workers 60–180 days after vaccination    |                                                     |
|                                                            |                                                     |

|                                                            |                                                    |
|------------------------------------------------------------|----------------------------------------------------|
| Rules_101                                                  | passed counts:2                                    |
| node_0: feature_name=HuIgG_0.03                            | feature_id[44].value > threshold=3298.333251953125 |
| node_78: feature_name=a-HuIgG_0.03                         | feature_id[1].value <= threshold=19665.666015625   |
| node_79: feature_name=SARS.CoV.2.S1.mFcTag                 | feature_id[0].value <= threshold=54010.166015625   |
| node_80: feature_name=SARS.CoV.2.S1+S2                     | feature_id[18].value <= threshold=48317.708984375  |
| node_81: feature_name=SARS.CoV.2.Spike.RBD.His.Bac         | feature_id[9].value > threshold=16347.4580078125   |
| node_111: feature_name=hCoV.NL63.S1                        | feature_id[5].value > threshold=4866.533447265625  |
| node_123: feature_name=MERS.CoV.S1.RBD.367.606.rFcTag      | feature_id[3].value > threshold=2789.3416748046875 |
| node_161: feature_name=SARS.CoV.S1.HisTag                  | feature_id[14].value > threshold=4926.39990234375  |
| node_179: feature_name=hCoV.HKU1.S1_S2                     | feature_id[22].value <= threshold=48084.783203125  |
| node_180: feature_name=SARS.CoV.2.Spike.RBD.His.Bac        | feature_id[9].value > threshold=31607.125          |
| node_200: feature_name=SARS.CoV.2.S1.HisTag                | feature_id[16].value <= threshold=43902.201171875  |
| node_201: feature_name=Flu.H1N1.HA1+HA2                    | feature_id[6].value <= threshold=30743.5           |
| node_202: feature_name=a-HuIgG_0.30                        | feature_id[30].value > threshold=42035.166015625   |
| Class: healthcare workers within 60 days after vaccination |                                                    |
|                                                            |                                                    |
| Rules_102                                                  | passed counts:2                                    |
| node_0: feature_name=HuIgG_0.03                            | feature_id[44].value > threshold=3298.333251953125 |
| node_78: feature_name=a-HuIgG_0.03                         | feature_id[1].value <= threshold=19665.666015625   |
| node_79: feature_name=SARS.CoV.2.S1.mFcTag                 | feature_id[0].value <= threshold=54010.166015625   |
| node_80: feature_name=SARS.CoV.2.S1+S2                     | feature_id[18].value <= threshold=48317.708984375  |
| node_81: feature_name=SARS.CoV.2.Spike.RBD.His.Bac         | feature_id[9].value > threshold=16347.4580078125   |
| node_111: feature_name=hCoV.NL63.S1                        | feature_id[5].value > threshold=4866.533447265625  |
| node_123: feature_name=MERS.CoV.S1.RBD.367.606.rFcTag      | feature_id[3].value > threshold=2789.3416748046875 |
| node_161: feature_name=SARS.CoV.S1.HisTag                  | feature_id[14].value > threshold=4926.39990234375  |

|                                                            |                                                     |
|------------------------------------------------------------|-----------------------------------------------------|
| node_179: feature_name=hCoV.HKU1.S1_S2                     | feature_id[22].value <= threshold=48084.783203125   |
| node_180: feature_name=SARS.CoV.2.Spike.RBD.His.Bac        | feature_id[9].value <= threshold=31607.125          |
| node_181: feature_name=SARS.CoV.2.S1                       | feature_id[15].value <= threshold=33718.333984375   |
| node_182: feature_name=a-HuIgG_0.03                        | feature_id[1].value > threshold=15402.5             |
| node_188: feature_name=a-MoIgA_0.10                        | feature_id[36].value > threshold=5932.166656494141  |
| Class: healthcare workers within 60 days after vaccination |                                                     |
|                                                            |                                                     |
| Rules_103                                                  | passed counts:2                                     |
| node_0: feature_name=HuIgG_0.03                            | feature_id[44].value > threshold=3298.333251953125  |
| node_78: feature_name=a-HuIgG_0.03                         | feature_id[1].value <= threshold=19665.666015625    |
| node_79: feature_name=SARS.CoV.2.S1.mFcTag                 | feature_id[0].value <= threshold=54010.166015625    |
| node_80: feature_name=SARS.CoV.2.S1+S2                     | feature_id[18].value <= threshold=48317.708984375   |
| node_81: feature_name=SARS.CoV.2.Spike.RBD.His.Bac         | feature_id[9].value > threshold=16347.4580078125    |
| node_111: feature_name=hCoV.NL63.S1                        | feature_id[5].value > threshold=4866.533447265625   |
| node_123: feature_name=MERS.CoV.S1.RBD.367.606.rFcTag      | feature_id[3].value > threshold=2789.3416748046875  |
| node_161: feature_name=SARS.CoV.S1.HisTag                  | feature_id[14].value > threshold=4926.39990234375   |
| node_179: feature_name=hCoV.HKU1.S1_S2                     | feature_id[22].value <= threshold=48084.783203125   |
| node_180: feature_name=SARS.CoV.2.Spike.RBD.His.Bac        | feature_id[9].value <= threshold=31607.125          |
| node_181: feature_name=SARS.CoV.2.S1                       | feature_id[15].value <= threshold=33718.333984375   |
| node_182: feature_name=a-HuIgG_0.03                        | feature_id[1].value > threshold=15402.5             |
| node_188: feature_name=a-MoIgA_0.10                        | feature_id[36].value <= threshold=5932.166656494141 |
| Class: healthcare workers over 180 days after vaccination  |                                                     |
|                                                            |                                                     |
| Rules_104                                                  | passed counts:2                                     |
| node_0: feature_name=HuIgG_0.03                            | feature_id[44].value > threshold=3298.333251953125  |



|                                                            |                                                      |
|------------------------------------------------------------|------------------------------------------------------|
| node_78: feature_name=a-HuIgG_0.03                         | feature_id[1].value <= threshold=19665.666015625     |
| node_79: feature_name=SARS.CoV.2.S1.mFcTag                 | feature_id[0].value <= threshold=54010.166015625     |
| node_80: feature_name=SARS.CoV.2.S1+S2                     | feature_id[18].value <= threshold=48317.708984375    |
| node_81: feature_name=SARS.CoV.2.Spike.RBD.His.Bac         | feature_id[9].value > threshold=16347.4580078125     |
| node_111: feature_name=hCoV.NL63.S1                        | feature_id[5].value > threshold=4866.533447265625    |
| node_123: feature_name=MERS.CoV.S1.RBD.367.606.rFcTag      | feature_id[3].value > threshold=2789.3416748046875   |
| node_161: feature_name=SARS.CoV.S1.HisTag                  | feature_id[14].value > threshold=4926.39990234375    |
| node_179: feature_name=hCoV.HKU1.S1_S2                     | feature_id[22].value <= threshold=48084.783203125    |
| node_180: feature_name=SARS.CoV.2.Spike.RBD.His.Bac        | feature_id[9].value <= threshold=31607.125           |
| node_181: feature_name=SARS.CoV.2.S1                       | feature_id[15].value <= threshold=33718.333984375    |
| node_182: feature_name=a-HuIgG_0.03                        | feature_id[1].value <= threshold=15402.5             |
| node_183: feature_name=a-HuIgM_0.30                        | feature_id[32].value <= threshold=1969.0000610351562 |
| Class: healthcare workers within 60 days after vaccination |                                                      |
|                                                            |                                                      |
| Rules_105                                                  | passed counts:2                                      |
| node_0: feature_name=HuIgG_0.03                            | feature_id[44].value > threshold=3298.333251953125   |
| node_78: feature_name=a-HuIgG_0.03                         | feature_id[1].value <= threshold=19665.666015625     |
| node_79: feature_name=SARS.CoV.2.S1.mFcTag                 | feature_id[0].value <= threshold=54010.166015625     |
| node_80: feature_name=SARS.CoV.2.S1+S2                     | feature_id[18].value <= threshold=48317.708984375    |
| node_81: feature_name=SARS.CoV.2.Spike.RBD.His.Bac         | feature_id[9].value > threshold=16347.4580078125     |
| node_111: feature_name=hCoV.NL63.S1                        | feature_id[5].value > threshold=4866.533447265625    |
| node_123: feature_name=MERS.CoV.S1.RBD.367.606.rFcTag      | feature_id[3].value <= threshold=2789.3416748046875  |
| node_124: feature_name=SARS.CoV.2.S1+S2                    | feature_id[18].value > threshold=41798.25            |
| node_140: feature_name=SARS.CoV.2.S1.RBD.mFc               | feature_id[17].value <= threshold=44491.166015625    |
| node_141: feature_name=a-HuIgM_0.03                        | feature_id[34].value > threshold=-6.833333492279053  |

|                                                            |                                                     |
|------------------------------------------------------------|-----------------------------------------------------|
| node_149: feature_name=a-MoIgA_0.30                        | feature_id[35].value <= threshold=935.3333435058594 |
| Class: healthcare workers 60–180 days after vaccination    |                                                     |
|                                                            |                                                     |
| Rules_106                                                  | passed counts:2                                     |
| node_0: feature_name=HuIgG_0.03                            | feature_id[44].value > threshold=3298.333251953125  |
| node_78: feature_name=a-HuIgG_0.03                         | feature_id[1].value <= threshold=19665.666015625    |
| node_79: feature_name=SARS.CoV.2.S1.mFcTag                 | feature_id[0].value <= threshold=54010.166015625    |
| node_80: feature_name=SARS.CoV.2.S1+S2                     | feature_id[18].value <= threshold=48317.708984375   |
| node_81: feature_name=SARS.CoV.2.Spike.RBD.His.Bac         | feature_id[9].value > threshold=16347.4580078125    |
| node_111: feature_name=hCoV.NL63.S1                        | feature_id[5].value > threshold=4866.533447265625   |
| node_123: feature_name=MERS.CoV.S1.RBD.367.606.rFcTag      | feature_id[3].value <= threshold=2789.3416748046875 |
| node_124: feature_name=SARS.CoV.2.S1+S2                    | feature_id[18].value <= threshold=41798.25          |
| node_125: feature_name=hCoV.OC43.S1_S2ECD.HisTag           | feature_id[24].value <= threshold=49554.1328125     |
| node_126: feature_name=SARS.CoV.2.Spike.RBD.His.Bac        | feature_id[9].value > threshold=23295.4169921875    |
| node_130: feature_name=Flu.H1N1.HA1                        | feature_id[26].value <= threshold=30553.0           |
| node_131: feature_name=MERS.CoV.S1.ECD.1-1297.HisTag       | feature_id[12].value > threshold=13902.69140625     |
| Class: healthcare workers within 60 days after vaccination |                                                     |
|                                                            |                                                     |
| Rules_107                                                  | passed counts:2                                     |
| node_0: feature_name=HuIgG_0.03                            | feature_id[44].value > threshold=3298.333251953125  |
| node_78: feature_name=a-HuIgG_0.03                         | feature_id[1].value <= threshold=19665.666015625    |
| node_79: feature_name=SARS.CoV.2.S1.mFcTag                 | feature_id[0].value <= threshold=54010.166015625    |
| node_80: feature_name=SARS.CoV.2.S1+S2                     | feature_id[18].value <= threshold=48317.708984375   |
| node_81: feature_name=SARS.CoV.2.Spike.RBD.His.Bac         | feature_id[9].value > threshold=16347.4580078125    |
| node_111: feature_name=hCoV.NL63.S1                        | feature_id[5].value <= threshold=4866.533447265625  |

|                                                         |                                                      |
|---------------------------------------------------------|------------------------------------------------------|
| node_112: feature_name=SARS.CoV.2.S1.mFcTag             | feature_id[0].value > threshold=40690.80078125       |
| node_116: feature_name=a-MoIgG_0.10                     | feature_id[38].value <= threshold=2424.6666259765625 |
| Class: healthcare workers 60–180 days after vaccination |                                                      |
|                                                         |                                                      |
| Rules_108                                               | passed counts:2                                      |
| node_0: feature_name=HuIgG_0.03                         | feature_id[44].value > threshold=3298.333251953125   |
| node_78: feature_name=a-HuIgG_0.03                      | feature_id[1].value <= threshold=19665.666015625     |
| node_79: feature_name=SARS.CoV.2.S1.mFcTag              | feature_id[0].value <= threshold=54010.166015625     |
| node_80: feature_name=SARS.CoV.2.S1+S2                  | feature_id[18].value <= threshold=48317.708984375    |
| node_81: feature_name=SARS.CoV.2.Spike.RBD.His.Bac      | feature_id[9].value <= threshold=16347.4580078125    |
| node_82: feature_name=SARS.CoV.2.S1                     | feature_id[15].value > threshold=2844.6334228515625  |
| node_90: feature_name=a-MoIgG_0.10                      | feature_id[38].value > threshold=1482.3333129882812  |
| node_98: feature_name=Flu.H1N1.HA1                      | feature_id[26].value <= threshold=52934.66015625     |
| node_99: feature_name=Flu.B_Phu/.HA1                    | feature_id[11].value <= threshold=27915.5419921875   |
| node_100: feature_name=hCoV.229E.S1                     | feature_id[2].value > threshold=33022.865234375      |
| Class: unvaccinated healthcare workers                  |                                                      |
|                                                         |                                                      |
| Rules_109                                               | passed counts:2                                      |
| node_0: feature_name=HuIgG_0.03                         | feature_id[44].value > threshold=3298.333251953125   |
| node_78: feature_name=a-HuIgG_0.03                      | feature_id[1].value <= threshold=19665.666015625     |
| node_79: feature_name=SARS.CoV.2.S1.mFcTag              | feature_id[0].value <= threshold=54010.166015625     |
| node_80: feature_name=SARS.CoV.2.S1+S2                  | feature_id[18].value <= threshold=48317.708984375    |
| node_81: feature_name=SARS.CoV.2.Spike.RBD.His.Bac      | feature_id[9].value <= threshold=16347.4580078125    |
| node_82: feature_name=SARS.CoV.2.S1                     | feature_id[15].value > threshold=2844.6334228515625  |
| node_90: feature_name=a-MoIgG_0.10                      | feature_id[38].value > threshold=1482.3333129882812  |

|                                                            |                                                     |
|------------------------------------------------------------|-----------------------------------------------------|
| node_98: feature_name=Flu.H1N1.HA1                         | feature_id[26].value <= threshold=52934.66015625    |
| node_99: feature_name=Flu.B_Phu/.HA1                       | feature_id[11].value <= threshold=27915.5419921875  |
| node_100: feature_name=hCoV.229E.S1                        | feature_id[2].value <= threshold=33022.865234375    |
| node_101: feature_name=SARS.CoV.2.S1.mFcTag                | feature_id[0].value <= threshold=25623.3671875      |
| Class: healthcare workers within 60 days after vaccination |                                                     |
| Rules_110                                                  | passed counts:2                                     |
| node_0: feature_name=HuIgG_0.03                            | feature_id[44].value <= threshold=3298.333251953125 |
| node_1: feature_name=SARS.CoV.2.S1.mFcTag                  | feature_id[0].value > threshold=5354.388916015625   |
| node_9: feature_name=HuIgM_0.03                            | feature_id[45].value > threshold=-80.66666793823242 |
| node_27: feature_name=HuIgM_0.03                           | feature_id[45].value <= threshold=61.33333206176758 |
| node_28: feature_name=a-HuIgG_0.30                         | feature_id[30].value <= threshold=34878.66796875    |
| node_29: feature_name=HuIgG_0.03                           | feature_id[44].value > threshold=769.8333435058594  |
| node_35: feature_name=SARS.CoV.S1.HisTag                   | feature_id[14].value > threshold=400.3000030517578  |
| node_39: feature_name=hCoV.HKU1.S1_S2                      | feature_id[22].value > threshold=42662.666015625    |
| node_61: feature_name=SARS.CoV.2.S1.HisTag                 | feature_id[16].value <= threshold=41690.958984375   |
| Class: healthcare workers within 60 days after vaccination |                                                     |
| Rules_111                                                  | passed counts:2                                     |
| node_0: feature_name=HuIgG_0.03                            | feature_id[44].value <= threshold=3298.333251953125 |
| node_1: feature_name=SARS.CoV.2.S1.mFcTag                  | feature_id[0].value > threshold=5354.388916015625   |
| node_9: feature_name=HuIgM_0.03                            | feature_id[45].value > threshold=-80.66666793823242 |
| node_27: feature_name=HuIgM_0.03                           | feature_id[45].value <= threshold=61.33333206176758 |
| node_28: feature_name=a-HuIgG_0.30                         | feature_id[30].value <= threshold=34878.66796875    |
| node_29: feature_name=HuIgG_0.03                           | feature_id[44].value > threshold=769.8333435058594  |

|                                                         |                                                      |
|---------------------------------------------------------|------------------------------------------------------|
| node_35: feature_name=SARS.CoV.S1.HisTag                | feature_id[14].value > threshold=400.3000030517578   |
| node_39: feature_name=hCoV.HKU1.S1_S2                   | feature_id[22].value <= threshold=42662.666015625    |
| node_40: feature_name=Flu.B_Phu/.HA1                    | feature_id[11].value <= threshold=49118.416015625    |
| node_41: feature_name=hCoV.OC43.HE                      | feature_id[10].value <= threshold=25184.06640625     |
| node_42: feature_name=HuIgM_0.30                        | feature_id[13].value <= threshold=1223.5             |
| node_43: feature_name=a-HuIgA_0.03                      | feature_id[29].value <= threshold=-59.66666603088379 |
| node_44: feature_name=Flu.B_Phu/.HA1                    | feature_id[11].value <= threshold=28467.833984375    |
| Class: healthcare workers 60–180 days after vaccination |                                                      |
|                                                         |                                                      |
| Rules_112                                               | passed counts:2                                      |
| node_0: feature_name=HuIgG_0.03                         | feature_id[44].value <= threshold=3298.333251953125  |
| node_1: feature_name=SARS.CoV.2.S1.mFcTag               | feature_id[0].value > threshold=5354.388916015625    |
| node_9: feature_name=HuIgM_0.03                         | feature_id[45].value > threshold=-80.66666793823242  |
| node_27: feature_name=HuIgM_0.03                        | feature_id[45].value <= threshold=61.33333206176758  |
| node_28: feature_name=a-HuIgG_0.30                      | feature_id[30].value <= threshold=34878.66796875     |
| node_29: feature_name=HuIgG_0.03                        | feature_id[44].value > threshold=769.8333435058594   |
| node_35: feature_name=SARS.CoV.S1.HisTag                | feature_id[14].value <= threshold=400.3000030517578  |
| node_36: feature_name=HuIgA_0.10                        | feature_id[42].value <= threshold=4194.666564941406  |
| Class: unvaccinated healthcare workers                  |                                                      |
|                                                         |                                                      |
| Rules_113                                               | passed counts:2                                      |
| node_0: feature_name=HuIgG_0.03                         | feature_id[44].value <= threshold=3298.333251953125  |
| node_1: feature_name=SARS.CoV.2.S1.mFcTag               | feature_id[0].value > threshold=5354.388916015625    |
| node_9: feature_name=HuIgM_0.03                         | feature_id[45].value <= threshold=-80.66666793823242 |
| node_10: feature_name=SARS.CoV.2.Spike.RBD.His.Bac      | feature_id[9].value <= threshold=29393.55859375      |

|                                                            |                                                      |
|------------------------------------------------------------|------------------------------------------------------|
| node_11: feature_name=DcCoV.HKU23.NP                       | feature_id[21].value > threshold=-639.3333129882812  |
| node_13: feature_name=MERS.CoV.S1.ECD.1-1297.HisTag        | feature_id[12].value <= threshold=1026.1666564941406 |
| node_14: feature_name=SARS.CoV.2.S1+S2                     | feature_id[18].value <= threshold=14681.66650390625  |
| Class: healthcare workers over 180 days after vaccination  |                                                      |
|                                                            |                                                      |
| Rules_114                                                  | passed counts:1                                      |
| node_0: feature_name=HuIgG_0.03                            | feature_id[44].value > threshold=3298.333251953125   |
| node_78: feature_name=a-HuIgG_0.03                         | feature_id[1].value > threshold=19665.666015625      |
| node_360: feature_name=HuIgM_0.03                          | feature_id[45].value > threshold=-189.0              |
| node_366: feature_name=HuIgM_0.30                          | feature_id[13].value > threshold=441.8333282470703   |
| node_368: feature_name=a-HuIgG_0.10                        | feature_id[31].value > threshold=32914.5             |
| node_372: feature_name=a-MoIgG_0.10                        | feature_id[38].value <= threshold=20281.6669921875   |
| node_373: feature_name=hCoV.229E.S1                        | feature_id[2].value > threshold=54372.5              |
| node_375: feature_name=hCoV.HKU1.S1_S2                     | feature_id[22].value <= threshold=44467.44921875     |
| Class: healthcare workers over 180 days after vaccination  |                                                      |
|                                                            |                                                      |
| Rules_115                                                  | passed counts:1                                      |
| node_0: feature_name=HuIgG_0.03                            | feature_id[44].value > threshold=3298.333251953125   |
| node_78: feature_name=a-HuIgG_0.03                         | feature_id[1].value > threshold=19665.666015625      |
| node_360: feature_name=HuIgM_0.03                          | feature_id[45].value <= threshold=-189.0             |
| node_361: feature_name=a-HuIgA_0.03                        | feature_id[29].value > threshold=3214.5              |
| node_363: feature_name=MoIgA_0.30                          | feature_id[46].value > threshold=4640.5001220703125  |
| Class: healthcare workers within 60 days after vaccination |                                                      |
|                                                            |                                                      |
| Rules_116                                                  | passed counts:1                                      |

|                                                           |                                                      |
|-----------------------------------------------------------|------------------------------------------------------|
| node_0: feature_name=HuIgG_0.03                           | feature_id[44].value > threshold=3298.333251953125   |
| node_78: feature_name=a-HuIgG_0.03                        | feature_id[1].value > threshold=19665.666015625      |
| node_360: feature_name=HuIgM_0.03                         | feature_id[45].value <= threshold=-189.0             |
| node_361: feature_name=a-HuIgA_0.03                       | feature_id[29].value > threshold=3214.5              |
| node_363: feature_name=MoIgA_0.30                         | feature_id[46].value <= threshold=4640.5001220703125 |
| Class: healthcare workers over 180 days after vaccination |                                                      |
|                                                           |                                                      |
| Rules_117                                                 | passed counts:1                                      |
| node_0: feature_name=HuIgG_0.03                           | feature_id[44].value > threshold=3298.333251953125   |
| node_78: feature_name=a-HuIgG_0.03                        | feature_id[1].value <= threshold=19665.666015625     |
| node_79: feature_name=SARS.CoV.2.S1.mFcTag                | feature_id[0].value > threshold=54010.166015625      |
| node_297: feature_name=a-MoIgG_0.10                       | feature_id[38].value > threshold=2382.8333740234375  |
| node_303: feature_name=SARS.CoV.2.S1                      | feature_id[15].value > threshold=51713.66796875      |
| node_345: feature_name=SARS.CoV.2.S1.HisTag               | feature_id[16].value > threshold=51766.75            |
| node_347: feature_name=HuIgA_0.03                         | feature_id[43].value > threshold=-60.33333396911621  |
| node_353: feature_name=SARS.CoV.2.Spike.RBD.His.Bac       | feature_id[9].value <= threshold=51551.166015625     |
| node_354: feature_name=SARS.CoV.NP                        | feature_id[19].value <= threshold=3082.949951171875  |
| Class: healthcare workers 60–180 days after vaccination   |                                                      |
|                                                           |                                                      |
| Rules_118                                                 | passed counts:1                                      |
| node_0: feature_name=HuIgG_0.03                           | feature_id[44].value > threshold=3298.333251953125   |
| node_78: feature_name=a-HuIgG_0.03                        | feature_id[1].value <= threshold=19665.666015625     |
| node_79: feature_name=SARS.CoV.2.S1.mFcTag                | feature_id[0].value > threshold=54010.166015625      |
| node_297: feature_name=a-MoIgG_0.10                       | feature_id[38].value > threshold=2382.8333740234375  |
| node_303: feature_name=SARS.CoV.2.S1                      | feature_id[15].value > threshold=51713.66796875      |

|                                                            |                                                      |
|------------------------------------------------------------|------------------------------------------------------|
| node_345: feature_name=SARS.CoV.2.S1.HisTag                | feature_id[16].value > threshold=51766.75            |
| node_347: feature_name=HuIgA_0.03                          | feature_id[43].value <= threshold=-60.33333396911621 |
| node_348: feature_name=hCoV.HKU1.S1_S2                     | feature_id[22].value > threshold=51287.134765625     |
| node_350: feature_name=a-HuIgG_0.03                        | feature_id[1].value > threshold=17172.0              |
| Class: unvaccinated healthcare workers                     |                                                      |
| Rules_119                                                  | passed counts:1                                      |
| node_0: feature_name=HuIgG_0.03                            | feature_id[44].value > threshold=3298.333251953125   |
| node_78: feature_name=a-HuIgG_0.03                         | feature_id[1].value <= threshold=19665.666015625     |
| node_79: feature_name=SARS.CoV.2.S1.mFcTag                 | feature_id[0].value > threshold=54010.166015625      |
| node_297: feature_name=a-MoIgG_0.10                        | feature_id[38].value > threshold=2382.8333740234375  |
| node_303: feature_name=SARS.CoV.2.S1                       | feature_id[15].value > threshold=51713.66796875      |
| node_345: feature_name=SARS.CoV.2.S1.HisTag                | feature_id[16].value > threshold=51766.75            |
| node_347: feature_name=HuIgA_0.03                          | feature_id[43].value <= threshold=-60.33333396911621 |
| node_348: feature_name=hCoV.HKU1.S1_S2                     | feature_id[22].value > threshold=51287.134765625     |
| node_350: feature_name=a-HuIgG_0.03                        | feature_id[1].value <= threshold=17172.0             |
| Class: healthcare workers within 60 days after vaccination |                                                      |
| Rules_120                                                  | passed counts:1                                      |
| node_0: feature_name=HuIgG_0.03                            | feature_id[44].value > threshold=3298.333251953125   |
| node_78: feature_name=a-HuIgG_0.03                         | feature_id[1].value <= threshold=19665.666015625     |
| node_79: feature_name=SARS.CoV.2.S1.mFcTag                 | feature_id[0].value > threshold=54010.166015625      |
| node_297: feature_name=a-MoIgG_0.10                        | feature_id[38].value > threshold=2382.8333740234375  |
| node_303: feature_name=SARS.CoV.2.S1                       | feature_id[15].value <= threshold=51713.66796875     |
| node_304: feature_name=hCoV.HKU1.S1_AA1.760                | feature_id[8].value > threshold=16192.1669921875     |



|                                                            |                                                      |
|------------------------------------------------------------|------------------------------------------------------|
| node_310: feature_name=a-HuIgM_0.10                        | feature_id[33].value > threshold=176.5               |
| node_314: feature_name=SARS.CoV.2.S1+S2                    | feature_id[18].value > threshold=50299.93359375      |
| node_318: feature_name=a-HuIgG_0.30                        | feature_id[30].value > threshold=47587.833984375     |
| node_336: feature_name=hCoV.HKU1.S1_AA1.760                | feature_id[8].value > threshold=45964.3828125        |
| node_342: feature_name=a-HuIgG_0.03                        | feature_id[1].value <= threshold=13373.1669921875    |
| Class: healthcare workers 60–180 days after vaccination    |                                                      |
|                                                            |                                                      |
| Rules_121                                                  | passed counts:1                                      |
| node_0: feature_name=HuIgG_0.03                            | feature_id[44].value > threshold=3298.333251953125   |
| node_78: feature_name=a-HuIgG_0.03                         | feature_id[1].value <= threshold=19665.666015625     |
| node_79: feature_name=SARS.CoV.2.S1.mFcTag                 | feature_id[0].value > threshold=54010.166015625      |
| node_297: feature_name=a-MoIgG_0.10                        | feature_id[38].value > threshold=2382.8333740234375  |
| node_303: feature_name=SARS.CoV.2.S1                       | feature_id[15].value <= threshold=51713.66796875     |
| node_304: feature_name=hCoV.HKU1.S1_AA1.760                | feature_id[8].value > threshold=16192.1669921875     |
| node_310: feature_name=a-HuIgM_0.10                        | feature_id[33].value > threshold=176.5               |
| node_314: feature_name=SARS.CoV.2.S1+S2                    | feature_id[18].value > threshold=50299.93359375      |
| node_318: feature_name=a-HuIgG_0.30                        | feature_id[30].value > threshold=47587.833984375     |
| node_336: feature_name=hCoV.HKU1.S1_AA1.760                | feature_id[8].value <= threshold=45964.3828125       |
| node_337: feature_name=SARS.CoV.2.S1+S2                    | feature_id[18].value > threshold=50700.5             |
| node_339: feature_name=a-MoIgA_0.30                        | feature_id[35].value <= threshold=1534.1666259765625 |
| Class: healthcare workers within 60 days after vaccination |                                                      |
|                                                            |                                                      |
| Rules_122                                                  | passed counts:1                                      |
| node_0: feature_name=HuIgG_0.03                            | feature_id[44].value > threshold=3298.333251953125   |
| node_78: feature_name=a-HuIgG_0.03                         | feature_id[1].value <= threshold=19665.666015625     |

|                                                            |                                                     |
|------------------------------------------------------------|-----------------------------------------------------|
| node_79: feature_name=SARS.CoV.2.S1.mFcTag                 | feature_id[0].value > threshold=54010.166015625     |
| node_297: feature_name=a-MoIgG_0.10                        | feature_id[38].value > threshold=2382.8333740234375 |
| node_303: feature_name=SARS.CoV.2.S1                       | feature_id[15].value <= threshold=51713.66796875    |
| node_304: feature_name=hCoV.HKU1.S1_AA1.760                | feature_id[8].value > threshold=16192.1669921875    |
| node_310: feature_name=a-HuIgM_0.10                        | feature_id[33].value > threshold=176.5              |
| node_314: feature_name=SARS.CoV.2.S1+S2                    | feature_id[18].value > threshold=50299.93359375     |
| node_318: feature_name=a-HuIgG_0.30                        | feature_id[30].value > threshold=47587.833984375    |
| node_336: feature_name=hCoV.HKU1.S1_AA1.760                | feature_id[8].value <= threshold=45964.3828125      |
| node_337: feature_name=SARS.CoV.2.S1+S2                    | feature_id[18].value <= threshold=50700.5           |
| Class: healthcare workers within 60 days after vaccination |                                                     |
|                                                            |                                                     |
| Rules_123                                                  | passed counts:1                                     |
| node_0: feature_name=HuIgG_0.03                            | feature_id[44].value > threshold=3298.333251953125  |
| node_78: feature_name=a-HuIgG_0.03                         | feature_id[1].value <= threshold=19665.666015625    |
| node_79: feature_name=SARS.CoV.2.S1.mFcTag                 | feature_id[0].value > threshold=54010.166015625     |
| node_297: feature_name=a-MoIgG_0.10                        | feature_id[38].value > threshold=2382.8333740234375 |
| node_303: feature_name=SARS.CoV.2.S1                       | feature_id[15].value <= threshold=51713.66796875    |
| node_304: feature_name=hCoV.HKU1.S1_AA1.760                | feature_id[8].value > threshold=16192.1669921875    |
| node_310: feature_name=a-HuIgM_0.10                        | feature_id[33].value > threshold=176.5              |
| node_314: feature_name=SARS.CoV.2.S1+S2                    | feature_id[18].value > threshold=50299.93359375     |
| node_318: feature_name=a-HuIgG_0.30                        | feature_id[30].value <= threshold=47587.833984375   |
| node_319: feature_name=MERS.CoV.S1.RBD.367.606.rFcTag      | feature_id[3].value > threshold=3945.61669921875    |
| node_323: feature_name=a-MoIgG_0.10                        | feature_id[38].value > threshold=6842.166748046875  |
| node_327: feature_name=SARS.CoV.2.S1.mFcTag                | feature_id[0].value > threshold=54403.482421875     |
| node_333: feature_name=Flu.B_Mal/.HA1+HA2                  | feature_id[25].value > threshold=53690.8828125      |

|                                                         |                                                     |
|---------------------------------------------------------|-----------------------------------------------------|
| Class: healthcare workers 60–180 days after vaccination |                                                     |
|                                                         |                                                     |
| Rules_124                                               | passed counts:1                                     |
| node_0: feature_name=HuIgG_0.03                         | feature_id[44].value > threshold=3298.333251953125  |
| node_78: feature_name=a-HuIgG_0.03                      | feature_id[1].value <= threshold=19665.666015625    |
| node_79: feature_name=SARS.CoV.2.S1.mFcTag              | feature_id[0].value > threshold=54010.166015625     |
| node_297: feature_name=a-MoIgG_0.10                     | feature_id[38].value > threshold=2382.8333740234375 |
| node_303: feature_name=SARS.CoV.2.S1                    | feature_id[15].value <= threshold=51713.66796875    |
| node_304: feature_name=hCoV.HKU1.S1_AA1.760             | feature_id[8].value > threshold=16192.1669921875    |
| node_310: feature_name=a-HuIgM_0.10                     | feature_id[33].value > threshold=176.5              |
| node_314: feature_name=SARS.CoV.2.S1+S2                 | feature_id[18].value > threshold=50299.93359375     |
| node_318: feature_name=a-HuIgG_0.30                     | feature_id[30].value <= threshold=47587.833984375   |
| node_319: feature_name=MERS.CoV.S1.RBD.367.606.rFcTag   | feature_id[3].value > threshold=3945.61669921875    |
| node_323: feature_name=a-MoIgG_0.10                     | feature_id[38].value > threshold=6842.166748046875  |
| node_327: feature_name=SARS.CoV.2.S1.mFcTag             | feature_id[0].value <= threshold=54403.482421875    |
| node_328: feature_name=HuIgG_0.03                       | feature_id[44].value <= threshold=5438.833251953125 |
| node_329: feature_name=SARS.CoV.2.S1.mFcTag             | feature_id[0].value > threshold=54295.33203125      |
| Class: unvaccinated healthcare workers                  |                                                     |
|                                                         |                                                     |
| Rules_125                                               | passed counts:1                                     |
| node_0: feature_name=HuIgG_0.03                         | feature_id[44].value > threshold=3298.333251953125  |
| node_78: feature_name=a-HuIgG_0.03                      | feature_id[1].value <= threshold=19665.666015625    |
| node_79: feature_name=SARS.CoV.2.S1.mFcTag              | feature_id[0].value > threshold=54010.166015625     |
| node_297: feature_name=a-MoIgG_0.10                     | feature_id[38].value > threshold=2382.8333740234375 |
| node_303: feature_name=SARS.CoV.2.S1                    | feature_id[15].value <= threshold=51713.66796875    |

|                                                            |                                                     |
|------------------------------------------------------------|-----------------------------------------------------|
| node_304: feature_name=hCoV.HKU1.S1_AA1.760                | feature_id[8].value > threshold=16192.1669921875    |
| node_310: feature_name=a-HuIgM_0.10                        | feature_id[33].value > threshold=176.5              |
| node_314: feature_name=SARS.CoV.2.S1+S2                    | feature_id[18].value > threshold=50299.93359375     |
| node_318: feature_name=a-HuIgG_0.30                        | feature_id[30].value <= threshold=47587.833984375   |
| node_319: feature_name=MERS.CoV.S1.RBD.367.606.rFcTag      | feature_id[3].value > threshold=3945.61669921875    |
| node_323: feature_name=a-MoIgG_0.10                        | feature_id[38].value > threshold=6842.166748046875  |
| node_327: feature_name=SARS.CoV.2.S1.mFcTag                | feature_id[0].value <= threshold=54403.482421875    |
| node_328: feature_name=HuIgG_0.03                          | feature_id[44].value <= threshold=5438.833251953125 |
| node_329: feature_name=SARS.CoV.2.S1.mFcTag                | feature_id[0].value <= threshold=54295.33203125     |
| Class: healthcare workers within 60 days after vaccination |                                                     |
|                                                            |                                                     |
| Rules_126                                                  | passed counts:1                                     |
| node_0: feature_name=HuIgG_0.03                            | feature_id[44].value > threshold=3298.333251953125  |
| node_78: feature_name=a-HuIgG_0.03                         | feature_id[1].value <= threshold=19665.666015625    |
| node_79: feature_name=SARS.CoV.2.S1.mFcTag                 | feature_id[0].value > threshold=54010.166015625     |
| node_297: feature_name=a-MoIgG_0.10                        | feature_id[38].value > threshold=2382.8333740234375 |
| node_303: feature_name=SARS.CoV.2.S1                       | feature_id[15].value <= threshold=51713.66796875    |
| node_304: feature_name=hCoV.HKU1.S1_AA1.760                | feature_id[8].value > threshold=16192.1669921875    |
| node_310: feature_name=a-HuIgM_0.10                        | feature_id[33].value > threshold=176.5              |
| node_314: feature_name=SARS.CoV.2.S1+S2                    | feature_id[18].value > threshold=50299.93359375     |
| node_318: feature_name=a-HuIgG_0.30                        | feature_id[30].value <= threshold=47587.833984375   |
| node_319: feature_name=MERS.CoV.S1.RBD.367.606.rFcTag      | feature_id[3].value > threshold=3945.61669921875    |
| node_323: feature_name=a-MoIgG_0.10                        | feature_id[38].value <= threshold=6842.166748046875 |
| node_324: feature_name=a-HuIgA_0.10                        | feature_id[28].value > threshold=2405.8333740234375 |
| Class: healthcare workers within 60 days after vaccination |                                                     |

|                                                            |                                                      |
|------------------------------------------------------------|------------------------------------------------------|
| Rules_127                                                  | passed counts:1                                      |
| node_0: feature_name=HuIgG_0.03                            | feature_id[44].value > threshold=3298.333251953125   |
| node_78: feature_name=a-HuIgG_0.03                         | feature_id[1].value <= threshold=19665.666015625     |
| node_79: feature_name=SARS.CoV.2.S1.mFcTag                 | feature_id[0].value > threshold=54010.166015625      |
| node_297: feature_name=a-MoIgG_0.10                        | feature_id[38].value > threshold=2382.8333740234375  |
| node_303: feature_name=SARS.CoV.2.S1                       | feature_id[15].value <= threshold=51713.66796875     |
| node_304: feature_name=hCoV.HKU1.S1_AA1.760                | feature_id[8].value > threshold=16192.1669921875     |
| node_310: feature_name=a-HuIgM_0.10                        | feature_id[33].value > threshold=176.5               |
| node_314: feature_name=SARS.CoV.2.S1+S2                    | feature_id[18].value <= threshold=50299.93359375     |
| node_315: feature_name=a-HuIgA_0.03                        | feature_id[29].value <= threshold=-68.0              |
| Class: healthcare workers within 60 days after vaccination |                                                      |
|                                                            |                                                      |
| Rules_128                                                  | passed counts:1                                      |
| node_0: feature_name=HuIgG_0.03                            | feature_id[44].value > threshold=3298.333251953125   |
| node_78: feature_name=a-HuIgG_0.03                         | feature_id[1].value <= threshold=19665.666015625     |
| node_79: feature_name=SARS.CoV.2.S1.mFcTag                 | feature_id[0].value > threshold=54010.166015625      |
| node_297: feature_name=a-MoIgG_0.10                        | feature_id[38].value <= threshold=2382.8333740234375 |
| node_298: feature_name=Flu.B_Mal/.HA1                      | feature_id[4].value <= threshold=41908.115234375     |
| node_299: feature_name=a-HuIgA_0.10                        | feature_id[28].value <= threshold=164.00000381469727 |
| Class: healthcare workers within 60 days after vaccination |                                                      |
|                                                            |                                                      |
| Rules_129                                                  | passed counts:1                                      |
| node_0: feature_name=HuIgG_0.03                            | feature_id[44].value > threshold=3298.333251953125   |
| node_78: feature_name=a-HuIgG_0.03                         | feature_id[1].value <= threshold=19665.666015625     |

|                                                         |                                                     |
|---------------------------------------------------------|-----------------------------------------------------|
| node_79: feature_name=SARS.CoV.2.S1.mFcTag              | feature_id[0].value <= threshold=54010.166015625    |
| node_80: feature_name=SARS.CoV.2.S1+S2                  | feature_id[18].value > threshold=48317.708984375    |
| node_224: feature_name=a-MoIgG_0.10                     | feature_id[38].value > threshold=2066.8333129882812 |
| node_226: feature_name=HuIgM_0.30                       | feature_id[13].value > threshold=750.1666870117188  |
| node_238: feature_name=HuIgM_0.30                       | feature_id[13].value > threshold=760.3333435058594  |
| node_240: feature_name=hCoV.OC43.HE                     | feature_id[10].value > threshold=3879.75            |
| node_246: feature_name=a-HuIgA_0.30                     | feature_id[27].value > threshold=1379.8333740234375 |
| node_248: feature_name=Flu.H1N1.HA1                     | feature_id[26].value <= threshold=53891.083984375   |
| node_249: feature_name=MERS.CoV.S1.RBD.367.606.rFcTag   | feature_id[3].value > threshold=1486.7666625976562  |
| node_253: feature_name=HuIgM_0.03                       | feature_id[45].value > threshold=-56.33333396911621 |
| node_279: feature_name=hCoV.229E.S1                     | feature_id[2].value > threshold=51743.583984375     |
| Class: healthcare workers 60–180 days after vaccination |                                                     |
|                                                         |                                                     |
| Rules_130                                               | passed counts:1                                     |
| node_0: feature_name=HuIgG_0.03                         | feature_id[44].value > threshold=3298.333251953125  |
| node_78: feature_name=a-HuIgG_0.03                      | feature_id[1].value <= threshold=19665.666015625    |
| node_79: feature_name=SARS.CoV.2.S1.mFcTag              | feature_id[0].value <= threshold=54010.166015625    |
| node_80: feature_name=SARS.CoV.2.S1+S2                  | feature_id[18].value > threshold=48317.708984375    |
| node_224: feature_name=a-MoIgG_0.10                     | feature_id[38].value > threshold=2066.8333129882812 |
| node_226: feature_name=HuIgM_0.30                       | feature_id[13].value > threshold=750.1666870117188  |
| node_238: feature_name=HuIgM_0.30                       | feature_id[13].value > threshold=760.3333435058594  |
| node_240: feature_name=hCoV.OC43.HE                     | feature_id[10].value > threshold=3879.75            |
| node_246: feature_name=a-HuIgA_0.30                     | feature_id[27].value > threshold=1379.8333740234375 |
| node_248: feature_name=Flu.H1N1.HA1                     | feature_id[26].value <= threshold=53891.083984375   |
| node_249: feature_name=MERS.CoV.S1.RBD.367.606.rFcTag   | feature_id[3].value > threshold=1486.7666625976562  |

|                                                           |                                                     |
|-----------------------------------------------------------|-----------------------------------------------------|
| node_253: feature_name=HuIgM_0.03                         | feature_id[45].value > threshold=-56.33333396911621 |
| node_279: feature_name=hCoV.229E.S1                       | feature_id[2].value <= threshold=51743.583984375    |
| node_280: feature_name=Flu.B_Mal/.HA1                     | feature_id[4].value > threshold=48206.833984375     |
| node_290: feature_name=MERS.CoV.S1.ECD.1-1297.HisTag      | feature_id[12].value <= threshold=25489.541015625   |
| node_291: feature_name=a-HuIgM_0.10                       | feature_id[33].value > threshold=1208.5             |
| Class: healthcare workers over 180 days after vaccination |                                                     |
|                                                           |                                                     |
| Rules_131                                                 | passed counts:1                                     |
| node_0: feature_name=HuIgG_0.03                           | feature_id[44].value > threshold=3298.333251953125  |
| node_78: feature_name=a-HuIgG_0.03                        | feature_id[1].value <= threshold=19665.666015625    |
| node_79: feature_name=SARS.CoV.2.S1.mFcTag                | feature_id[0].value <= threshold=54010.166015625    |
| node_80: feature_name=SARS.CoV.2.S1+S2                    | feature_id[18].value > threshold=48317.708984375    |
| node_224: feature_name=a-MoIgG_0.10                       | feature_id[38].value > threshold=2066.8333129882812 |
| node_226: feature_name=HuIgM_0.30                         | feature_id[13].value > threshold=750.1666870117188  |
| node_238: feature_name=HuIgM_0.30                         | feature_id[13].value > threshold=760.3333435058594  |
| node_240: feature_name=hCoV.OC43.HE                       | feature_id[10].value > threshold=3879.75            |
| node_246: feature_name=a-HuIgA_0.30                       | feature_id[27].value > threshold=1379.8333740234375 |
| node_248: feature_name=Flu.H1N1.HA1                       | feature_id[26].value <= threshold=53891.083984375   |
| node_249: feature_name=MERS.CoV.S1.RBD.367.606.rFcTag     | feature_id[3].value > threshold=1486.7666625976562  |
| node_253: feature_name=HuIgM_0.03                         | feature_id[45].value > threshold=-56.33333396911621 |
| node_279: feature_name=hCoV.229E.S1                       | feature_id[2].value <= threshold=51743.583984375    |
| node_280: feature_name=Flu.B_Mal/.HA1                     | feature_id[4].value > threshold=48206.833984375     |
| node_290: feature_name=MERS.CoV.S1.ECD.1-1297.HisTag      | feature_id[12].value <= threshold=25489.541015625   |
| node_291: feature_name=a-HuIgM_0.10                       | feature_id[33].value <= threshold=1208.5            |
| Class: healthcare workers 60–180 days after vaccination   |                                                     |

|                                                         |                                                     |
|---------------------------------------------------------|-----------------------------------------------------|
| Rules_132                                               | passed counts:1                                     |
| node_0: feature_name=HuIgG_0.03                         | feature_id[44].value > threshold=3298.333251953125  |
| node_78: feature_name=a-HuIgG_0.03                      | feature_id[1].value <= threshold=19665.666015625    |
| node_79: feature_name=SARS.CoV.2.S1.mFcTag              | feature_id[0].value <= threshold=54010.166015625    |
| node_80: feature_name=SARS.CoV.2.S1+S2                  | feature_id[18].value > threshold=48317.708984375    |
| node_224: feature_name=a-MoIgG_0.10                     | feature_id[38].value > threshold=2066.8333129882812 |
| node_226: feature_name=HuIgM_0.30                       | feature_id[13].value > threshold=750.1666870117188  |
| node_238: feature_name=HuIgM_0.30                       | feature_id[13].value > threshold=760.3333435058594  |
| node_240: feature_name=hCoV.OC43.HE                     | feature_id[10].value > threshold=3879.75            |
| node_246: feature_name=a-HuIgA_0.30                     | feature_id[27].value > threshold=1379.8333740234375 |
| node_248: feature_name=Flu.H1N1.HA1                     | feature_id[26].value <= threshold=53891.083984375   |
| node_249: feature_name=MERS.CoV.S1.RBD.367.606.rFcTag   | feature_id[3].value > threshold=1486.7666625976562  |
| node_253: feature_name=HuIgM_0.03                       | feature_id[45].value > threshold=-56.33333396911621 |
| node_279: feature_name=hCoV.229E.S1                     | feature_id[2].value <= threshold=51743.583984375    |
| node_280: feature_name=Flu.B_Mal/.HA1                   | feature_id[4].value <= threshold=48206.833984375    |
| node_281: feature_name=a-MoIgM_0.10                     | feature_id[40].value > threshold=989.5000305175781  |
| node_285: feature_name=HuIgM_0.30                       | feature_id[13].value > threshold=2008.3333129882812 |
| node_287: feature_name=SARS.CoV.2.S1.RBD.mFc            | feature_id[17].value <= threshold=43325.44921875    |
| Class: healthcare workers 60–180 days after vaccination |                                                     |
| Rules_133                                               | passed counts:1                                     |
| node_0: feature_name=HuIgG_0.03                         | feature_id[44].value > threshold=3298.333251953125  |
| node_78: feature_name=a-HuIgG_0.03                      | feature_id[1].value <= threshold=19665.666015625    |
| node_79: feature_name=SARS.CoV.2.S1.mFcTag              | feature_id[0].value <= threshold=54010.166015625    |



|                                                            |                                                     |
|------------------------------------------------------------|-----------------------------------------------------|
| node_80: feature_name=SARS.CoV.2.S1+S2                     | feature_id[18].value > threshold=48317.708984375    |
| node_224: feature_name=a-MoIgG_0.10                        | feature_id[38].value > threshold=2066.8333129882812 |
| node_226: feature_name=HuIgM_0.30                          | feature_id[13].value > threshold=750.1666870117188  |
| node_238: feature_name=HuIgM_0.30                          | feature_id[13].value > threshold=760.3333435058594  |
| node_240: feature_name=hCoV.OC43.HE                        | feature_id[10].value > threshold=3879.75            |
| node_246: feature_name=a-HuIgA_0.30                        | feature_id[27].value > threshold=1379.8333740234375 |
| node_248: feature_name=Flu.H1N1.HA1                        | feature_id[26].value <= threshold=53891.083984375   |
| node_249: feature_name=MERS.CoV.S1.RBD.367.606.rFcTag      | feature_id[3].value > threshold=1486.7666625976562  |
| node_253: feature_name=HuIgM_0.03                          | feature_id[45].value > threshold=-56.33333396911621 |
| node_279: feature_name=hCoV.229E.S1                        | feature_id[2].value <= threshold=51743.583984375    |
| node_280: feature_name=Flu.B_Mal/.HA1                      | feature_id[4].value <= threshold=48206.833984375    |
| node_281: feature_name=a-MoIgM_0.10                        | feature_id[40].value <= threshold=989.5000305175781 |
| node_282: feature_name=SARS.CoV.S1.HisTag                  | feature_id[14].value > threshold=22347.5166015625   |
| Class: healthcare workers within 60 days after vaccination |                                                     |
|                                                            |                                                     |
| Rules_134                                                  | passed counts:1                                     |
| node_0: feature_name=HuIgG_0.03                            | feature_id[44].value > threshold=3298.333251953125  |
| node_78: feature_name=a-HuIgG_0.03                         | feature_id[1].value <= threshold=19665.666015625    |
| node_79: feature_name=SARS.CoV.2.S1.mFcTag                 | feature_id[0].value <= threshold=54010.166015625    |
| node_80: feature_name=SARS.CoV.2.S1+S2                     | feature_id[18].value > threshold=48317.708984375    |
| node_224: feature_name=a-MoIgG_0.10                        | feature_id[38].value > threshold=2066.8333129882812 |
| node_226: feature_name=HuIgM_0.30                          | feature_id[13].value > threshold=750.1666870117188  |
| node_238: feature_name=HuIgM_0.30                          | feature_id[13].value > threshold=760.3333435058594  |
| node_240: feature_name=hCoV.OC43.HE                        | feature_id[10].value > threshold=3879.75            |
| node_246: feature_name=a-HuIgA_0.30                        | feature_id[27].value > threshold=1379.8333740234375 |

|                                                         |                                                      |
|---------------------------------------------------------|------------------------------------------------------|
| node_248: feature_name=Flu.H1N1.HA1                     | feature_id[26].value <= threshold=53891.083984375    |
| node_249: feature_name=MERS.CoV.S1.RBD.367.606.rFcTag   | feature_id[3].value > threshold=1486.7666625976562   |
| node_253: feature_name=HuIgM_0.03                       | feature_id[45].value > threshold=-56.33333396911621  |
| node_279: feature_name=hCoV.229E.S1                     | feature_id[2].value <= threshold=51743.583984375     |
| node_280: feature_name=Flu.B_Mal/.HA1                   | feature_id[4].value <= threshold=48206.833984375     |
| node_281: feature_name=a-MoIgM_0.10                     | feature_id[40].value <= threshold=989.5000305175781  |
| node_282: feature_name=SARS.CoV.S1.HisTag               | feature_id[14].value <= threshold=22347.5166015625   |
| Class: healthcare workers 60–180 days after vaccination |                                                      |
|                                                         |                                                      |
| Rules_135                                               | passed counts:1                                      |
| node_0: feature_name=HuIgG_0.03                         | feature_id[44].value > threshold=3298.333251953125   |
| node_78: feature_name=a-HuIgG_0.03                      | feature_id[1].value <= threshold=19665.666015625     |
| node_79: feature_name=SARS.CoV.2.S1.mFcTag              | feature_id[0].value <= threshold=54010.166015625     |
| node_80: feature_name=SARS.CoV.2.S1+S2                  | feature_id[18].value > threshold=48317.708984375     |
| node_224: feature_name=a-MoIgG_0.10                     | feature_id[38].value > threshold=2066.8333129882812  |
| node_226: feature_name=HuIgM_0.30                       | feature_id[13].value > threshold=750.1666870117188   |
| node_238: feature_name=HuIgM_0.30                       | feature_id[13].value > threshold=760.3333435058594   |
| node_240: feature_name=hCoV.OC43.HE                     | feature_id[10].value > threshold=3879.75             |
| node_246: feature_name=a-HuIgA_0.30                     | feature_id[27].value > threshold=1379.8333740234375  |
| node_248: feature_name=Flu.H1N1.HA1                     | feature_id[26].value <= threshold=53891.083984375    |
| node_249: feature_name=MERS.CoV.S1.RBD.367.606.rFcTag   | feature_id[3].value > threshold=1486.7666625976562   |
| node_253: feature_name=HuIgM_0.03                       | feature_id[45].value <= threshold=-56.33333396911621 |
| node_254: feature_name=MoIgA_0.30                       | feature_id[46].value > threshold=900.1666564941406   |
| node_258: feature_name=SARS.CoV.2.S1.mFcTag             | feature_id[0].value > threshold=53346.333984375      |
| node_272: feature_name=a-MoIgA_0.03                     | feature_id[37].value > threshold=2.3333334028720856  |

|                                                            |                                                      |
|------------------------------------------------------------|------------------------------------------------------|
| node_274: feature_name=Flu.B_Mal/.HA1+HA2                  | feature_id[25].value <= threshold=53981.70703125     |
| node_275: feature_name=a-MoIgG_0.10                        | feature_id[38].value > threshold=22321.6669921875    |
| Class: healthcare workers within 60 days after vaccination |                                                      |
|                                                            |                                                      |
| Rules_136                                                  | passed counts:1                                      |
| node_0: feature_name=HuIgG_0.03                            | feature_id[44].value > threshold=3298.333251953125   |
| node_78: feature_name=a-HuIgG_0.03                         | feature_id[1].value <= threshold=19665.666015625     |
| node_79: feature_name=SARS.CoV.2.S1.mFcTag                 | feature_id[0].value <= threshold=54010.166015625     |
| node_80: feature_name=SARS.CoV.2.S1+S2                     | feature_id[18].value > threshold=48317.708984375     |
| node_224: feature_name=a-MoIgG_0.10                        | feature_id[38].value > threshold=2066.8333129882812  |
| node_226: feature_name=HuIgM_0.30                          | feature_id[13].value > threshold=750.1666870117188   |
| node_238: feature_name=HuIgM_0.30                          | feature_id[13].value > threshold=760.3333435058594   |
| node_240: feature_name=hCoV.OC43.HE                        | feature_id[10].value > threshold=3879.75             |
| node_246: feature_name=a-HuIgA_0.30                        | feature_id[27].value > threshold=1379.8333740234375  |
| node_248: feature_name=Flu.H1N1.HA1                        | feature_id[26].value <= threshold=53891.083984375    |
| node_249: feature_name=MERS.CoV.S1.RBD.367.606.rFcTag      | feature_id[3].value > threshold=1486.7666625976562   |
| node_253: feature_name=HuIgM_0.03                          | feature_id[45].value <= threshold=-56.33333396911621 |
| node_254: feature_name=MoIgA_0.30                          | feature_id[46].value > threshold=900.1666564941406   |
| node_258: feature_name=SARS.CoV.2.S1.mFcTag                | feature_id[0].value <= threshold=53346.333984375     |
| node_259: feature_name=SARS.CoV.2.S1                       | feature_id[15].value <= threshold=47301.333984375    |
| node_260: feature_name=a-MoIgM_0.03                        | feature_id[41].value > threshold=127.16666793823242  |
| node_262: feature_name=hCoV.OC43.HE                        | feature_id[10].value > threshold=12272.5166015625    |
| node_268: feature_name=HuIgM_0.03                          | feature_id[45].value > threshold=-57.16666603088379  |
| Class: healthcare workers 60–180 days after vaccination    |                                                      |
|                                                            |                                                      |

|                                                            |                                                      |
|------------------------------------------------------------|------------------------------------------------------|
| Rules_137                                                  | passed counts:1                                      |
| node_0: feature_name=HuIgG_0.03                            | feature_id[44].value > threshold=3298.333251953125   |
| node_78: feature_name=a-HuIgG_0.03                         | feature_id[1].value <= threshold=19665.666015625     |
| node_79: feature_name=SARS.CoV.2.S1.mFcTag                 | feature_id[0].value <= threshold=54010.166015625     |
| node_80: feature_name=SARS.CoV.2.S1+S2                     | feature_id[18].value > threshold=48317.708984375     |
| node_224: feature_name=a-MoIgG_0.10                        | feature_id[38].value > threshold=2066.8333129882812  |
| node_226: feature_name=HuIgM_0.30                          | feature_id[13].value > threshold=750.1666870117188   |
| node_238: feature_name=HuIgM_0.30                          | feature_id[13].value > threshold=760.3333435058594   |
| node_240: feature_name=hCoV.OC43.HE                        | feature_id[10].value > threshold=3879.75             |
| node_246: feature_name=a-HuIgA_0.30                        | feature_id[27].value > threshold=1379.8333740234375  |
| node_248: feature_name=Flu.H1N1.HA1                        | feature_id[26].value <= threshold=53891.083984375    |
| node_249: feature_name=MERS.CoV.S1.RBD.367.606.rFcTag      | feature_id[3].value > threshold=1486.7666625976562   |
| node_253: feature_name=HuIgM_0.03                          | feature_id[45].value <= threshold=-56.33333396911621 |
| node_254: feature_name=MoIgA_0.30                          | feature_id[46].value > threshold=900.1666564941406   |
| node_258: feature_name=SARS.CoV.2.S1.mFcTag                | feature_id[0].value <= threshold=53346.333984375     |
| node_259: feature_name=SARS.CoV.2.S1                       | feature_id[15].value <= threshold=47301.333984375    |
| node_260: feature_name=a-MoIgM_0.03                        | feature_id[41].value > threshold=127.16666793823242  |
| node_262: feature_name=hCoV.OC43.HE                        | feature_id[10].value <= threshold=12272.5166015625   |
| node_263: feature_name=SARS.CoV.2.S1+S2                    | feature_id[18].value > threshold=49907.841796875     |
| node_265: feature_name=a-MoIgG_0.10                        | feature_id[38].value > threshold=23887.5             |
| Class: healthcare workers within 60 days after vaccination |                                                      |
|                                                            |                                                      |
| Rules_138                                                  | passed counts:1                                      |
| node_0: feature_name=HuIgG_0.03                            | feature_id[44].value > threshold=3298.333251953125   |
| node_78: feature_name=a-HuIgG_0.03                         | feature_id[1].value <= threshold=19665.666015625     |

|                                                            |                                                      |
|------------------------------------------------------------|------------------------------------------------------|
| node_79: feature_name=SARS.CoV.2.S1.mFcTag                 | feature_id[0].value <= threshold=54010.166015625     |
| node_80: feature_name=SARS.CoV.2.S1+S2                     | feature_id[18].value > threshold=48317.708984375     |
| node_224: feature_name=a-MoIgG_0.10                        | feature_id[38].value > threshold=2066.8333129882812  |
| node_226: feature_name=HuIgM_0.30                          | feature_id[13].value > threshold=750.1666870117188   |
| node_238: feature_name=HuIgM_0.30                          | feature_id[13].value > threshold=760.3333435058594   |
| node_240: feature_name=hCoV.OC43.HE                        | feature_id[10].value > threshold=3879.75             |
| node_246: feature_name=a-HuIgA_0.30                        | feature_id[27].value > threshold=1379.8333740234375  |
| node_248: feature_name=Flu.H1N1.HA1                        | feature_id[26].value <= threshold=53891.083984375    |
| node_249: feature_name=MERS.CoV.S1.RBD.367.606.rFcTag      | feature_id[3].value > threshold=1486.7666625976562   |
| node_253: feature_name=HuIgM_0.03                          | feature_id[45].value <= threshold=-56.33333396911621 |
| node_254: feature_name=MoIgA_0.30                          | feature_id[46].value <= threshold=900.1666564941406  |
| node_255: feature_name=SARS.CoV.2.S1.RBD.mFc               | feature_id[17].value > threshold=51784.3828125       |
| Class: healthcare workers within 60 days after vaccination |                                                      |
|                                                            |                                                      |
| Rules_139                                                  | passed counts:1                                      |
| node_0: feature_name=HuIgG_0.03                            | feature_id[44].value > threshold=3298.333251953125   |
| node_78: feature_name=a-HuIgG_0.03                         | feature_id[1].value <= threshold=19665.666015625     |
| node_79: feature_name=SARS.CoV.2.S1.mFcTag                 | feature_id[0].value <= threshold=54010.166015625     |
| node_80: feature_name=SARS.CoV.2.S1+S2                     | feature_id[18].value > threshold=48317.708984375     |
| node_224: feature_name=a-MoIgG_0.10                        | feature_id[38].value > threshold=2066.8333129882812  |
| node_226: feature_name=HuIgM_0.30                          | feature_id[13].value > threshold=750.1666870117188   |
| node_238: feature_name=HuIgM_0.30                          | feature_id[13].value > threshold=760.3333435058594   |
| node_240: feature_name=hCoV.OC43.HE                        | feature_id[10].value > threshold=3879.75             |
| node_246: feature_name=a-HuIgA_0.30                        | feature_id[27].value > threshold=1379.8333740234375  |
| node_248: feature_name=Flu.H1N1.HA1                        | feature_id[26].value <= threshold=53891.083984375    |

|                                                            |                                                       |
|------------------------------------------------------------|-------------------------------------------------------|
| node_249: feature_name=MERS.CoV.S1.RBD.367.606.rFcTag      | feature_id[3].value <= threshold=1486.7666625976562   |
| node_250: feature_name=a-MoIgM_0.10                        | feature_id[40].value <= threshold=1601.8333129882812  |
| Class: healthcare workers within 60 days after vaccination |                                                       |
|                                                            |                                                       |
| Rules_140                                                  | passed counts:1                                       |
| node_0: feature_name=HuIgG_0.03                            | feature_id[44].value > threshold=3298.333251953125    |
| node_78: feature_name=a-HuIgG_0.03                         | feature_id[1].value <= threshold=19665.666015625      |
| node_79: feature_name=SARS.CoV.2.S1.mFcTag                 | feature_id[0].value <= threshold=54010.166015625      |
| node_80: feature_name=SARS.CoV.2.S1+S2                     | feature_id[18].value > threshold=48317.708984375      |
| node_224: feature_name=a-MoIgG_0.10                        | feature_id[38].value > threshold=2066.8333129882812   |
| node_226: feature_name=HuIgM_0.30                          | feature_id[13].value <= threshold=750.1666870117188   |
| node_227: feature_name=SARS.CoV.S1.RBD.HisTag              | feature_id[20].value > threshold=7585.25              |
| node_233: feature_name=SARS.CoV.2.S1.HisTag                | feature_id[16].value > threshold=29169.625            |
| node_235: feature_name=a-MoIgA_0.03                        | feature_id[37].value <= threshold=-137.16666412353516 |
| Class: healthcare workers 60–180 days after vaccination    |                                                       |
|                                                            |                                                       |
| Rules_141                                                  | passed counts:1                                       |
| node_0: feature_name=HuIgG_0.03                            | feature_id[44].value > threshold=3298.333251953125    |
| node_78: feature_name=a-HuIgG_0.03                         | feature_id[1].value <= threshold=19665.666015625      |
| node_79: feature_name=SARS.CoV.2.S1.mFcTag                 | feature_id[0].value <= threshold=54010.166015625      |
| node_80: feature_name=SARS.CoV.2.S1+S2                     | feature_id[18].value > threshold=48317.708984375      |
| node_224: feature_name=a-MoIgG_0.10                        | feature_id[38].value > threshold=2066.8333129882812   |
| node_226: feature_name=HuIgM_0.30                          | feature_id[13].value <= threshold=750.1666870117188   |
| node_227: feature_name=SARS.CoV.S1.RBD.HisTag              | feature_id[20].value > threshold=7585.25              |
| node_233: feature_name=SARS.CoV.2.S1.HisTag                | feature_id[16].value <= threshold=29169.625           |

|                                                         |                                                     |
|---------------------------------------------------------|-----------------------------------------------------|
| Class: healthcare workers 60–180 days after vaccination |                                                     |
|                                                         |                                                     |
| Rules_142                                               | passed counts:1                                     |
| node_0: feature_name=HuIgG_0.03                         | feature_id[44].value > threshold=3298.333251953125  |
| node_78: feature_name=a-HuIgG_0.03                      | feature_id[1].value <= threshold=19665.666015625    |
| node_79: feature_name=SARS.CoV.2.S1.mFcTag              | feature_id[0].value <= threshold=54010.166015625    |
| node_80: feature_name=SARS.CoV.2.S1+S2                  | feature_id[18].value > threshold=48317.708984375    |
| node_224: feature_name=a-MoIgG_0.10                     | feature_id[38].value > threshold=2066.8333129882812 |
| node_226: feature_name=HuIgM_0.30                       | feature_id[13].value <= threshold=750.1666870117188 |
| node_227: feature_name=SARS.CoV.S1.RBD.HisTag           | feature_id[20].value <= threshold=7585.25           |
| node_228: feature_name=MERS.CoV.S1.ECD.1-1297.HisTag    | feature_id[12].value > threshold=22314.0            |
| node_230: feature_name=SARS.CoV.2.Spike.RBD.rFc         | feature_id[7].value <= threshold=25894.986328125    |
| Class: unvaccinated healthcare workers                  |                                                     |
|                                                         |                                                     |
| Rules_143                                               | passed counts:1                                     |
| node_0: feature_name=HuIgG_0.03                         | feature_id[44].value > threshold=3298.333251953125  |
| node_78: feature_name=a-HuIgG_0.03                      | feature_id[1].value <= threshold=19665.666015625    |
| node_79: feature_name=SARS.CoV.2.S1.mFcTag              | feature_id[0].value <= threshold=54010.166015625    |
| node_80: feature_name=SARS.CoV.2.S1+S2                  | feature_id[18].value <= threshold=48317.708984375   |
| node_81: feature_name=SARS.CoV.2.Spike.RBD.His.Bac      | feature_id[9].value > threshold=16347.4580078125    |
| node_111: feature_name=hCoV.NL63.S1                     | feature_id[5].value > threshold=4866.533447265625   |
| node_123: feature_name=MERS.CoV.S1.RBD.367.606.rFcTag   | feature_id[3].value > threshold=2789.3416748046875  |
| node_161: feature_name=SARS.CoV.S1.HisTag               | feature_id[14].value > threshold=4926.39990234375   |
| node_179: feature_name=hCoV.HKU1.S1_S2                  | feature_id[22].value <= threshold=48084.783203125   |
| node_180: feature_name=SARS.CoV.2.Spike.RBD.His.Bac     | feature_id[9].value > threshold=31607.125           |

|                                                            |                                                     |
|------------------------------------------------------------|-----------------------------------------------------|
| node_200: feature_name=SARS.CoV.2.S1.HisTag                | feature_id[16].value <= threshold=43902.201171875   |
| node_201: feature_name=Flu.H1N1.HA1+HA2                    | feature_id[6].value > threshold=30743.5             |
| node_205: feature_name=Flu.B_Phu/.HA1                      | feature_id[11].value > threshold=18442.14111328125  |
| node_207: feature_name=SARS.CoV.2.Spike.RBD.rFc            | feature_id[7].value > threshold=39119.033203125     |
| node_209: feature_name=MERS.CoV.S1.ECD.1-1297.HisTag       | feature_id[12].value <= threshold=11020.70849609375 |
| node_210: feature_name=hCoV.OC43.S1_S2ECD.HisTag           | feature_id[24].value > threshold=37992.375          |
| Class: healthcare workers within 60 days after vaccination |                                                     |
|                                                            |                                                     |
| Rules_144                                                  | passed counts:1                                     |
| node_0: feature_name=HuIgG_0.03                            | feature_id[44].value > threshold=3298.333251953125  |
| node_78: feature_name=a-HuIgG_0.03                         | feature_id[1].value <= threshold=19665.666015625    |
| node_79: feature_name=SARS.CoV.2.S1.mFcTag                 | feature_id[0].value <= threshold=54010.166015625    |
| node_80: feature_name=SARS.CoV.2.S1+S2                     | feature_id[18].value <= threshold=48317.708984375   |
| node_81: feature_name=SARS.CoV.2.Spike.RBD.His.Bac         | feature_id[9].value > threshold=16347.4580078125    |
| node_111: feature_name=hCoV.NL63.S1                        | feature_id[5].value > threshold=4866.533447265625   |
| node_123: feature_name=MERS.CoV.S1.RBD.367.606.rFcTag      | feature_id[3].value > threshold=2789.3416748046875  |
| node_161: feature_name=SARS.CoV.S1.HisTag                  | feature_id[14].value > threshold=4926.39990234375   |
| node_179: feature_name=hCoV.HKU1.S1_S2                     | feature_id[22].value <= threshold=48084.783203125   |
| node_180: feature_name=SARS.CoV.2.Spike.RBD.His.Bac        | feature_id[9].value > threshold=31607.125           |
| node_200: feature_name=SARS.CoV.2.S1.HisTag                | feature_id[16].value <= threshold=43902.201171875   |
| node_201: feature_name=Flu.H1N1.HA1+HA2                    | feature_id[6].value > threshold=30743.5             |
| node_205: feature_name=Flu.B_Phu/.HA1                      | feature_id[11].value > threshold=18442.14111328125  |
| node_207: feature_name=SARS.CoV.2.Spike.RBD.rFc            | feature_id[7].value > threshold=39119.033203125     |
| node_209: feature_name=MERS.CoV.S1.ECD.1-1297.HisTag       | feature_id[12].value <= threshold=11020.70849609375 |
| node_210: feature_name=hCoV.OC43.S1_S2ECD.HisTag           | feature_id[24].value <= threshold=37992.375         |



|                                                            |                                                    |
|------------------------------------------------------------|----------------------------------------------------|
| Class: healthcare workers 60–180 days after vaccination    |                                                    |
|                                                            |                                                    |
| Rules_145                                                  | passed counts:1                                    |
| node_0: feature_name=HuIgG_0.03                            | feature_id[44].value > threshold=3298.333251953125 |
| node_78: feature_name=a-HuIgG_0.03                         | feature_id[1].value <= threshold=19665.666015625   |
| node_79: feature_name=SARS.CoV.2.S1.mFcTag                 | feature_id[0].value <= threshold=54010.166015625   |
| node_80: feature_name=SARS.CoV.2.S1+S2                     | feature_id[18].value <= threshold=48317.708984375  |
| node_81: feature_name=SARS.CoV.2.Spike.RBD.His.Bac         | feature_id[9].value > threshold=16347.4580078125   |
| node_111: feature_name=hCoV.NL63.S1                        | feature_id[5].value > threshold=4866.533447265625  |
| node_123: feature_name=MERS.CoV.S1.RBD.367.606.rFcTag      | feature_id[3].value > threshold=2789.3416748046875 |
| node_161: feature_name=SARS.CoV.S1.HisTag                  | feature_id[14].value > threshold=4926.39990234375  |
| node_179: feature_name=hCoV.HKU1.S1_S2                     | feature_id[22].value <= threshold=48084.783203125  |
| node_180: feature_name=SARS.CoV.2.Spike.RBD.His.Bac        | feature_id[9].value > threshold=31607.125          |
| node_200: feature_name=SARS.CoV.2.S1.HisTag                | feature_id[16].value <= threshold=43902.201171875  |
| node_201: feature_name=Flu.H1N1.HA1+HA2                    | feature_id[6].value > threshold=30743.5            |
| node_205: feature_name=Flu.B_Phu/.HA1                      | feature_id[11].value > threshold=18442.14111328125 |
| node_207: feature_name=SARS.CoV.2.Spike.RBD.rFc            | feature_id[7].value <= threshold=39119.033203125   |
| Class: healthcare workers within 60 days after vaccination |                                                    |
|                                                            |                                                    |
| Rules_146                                                  | passed counts:1                                    |
| node_0: feature_name=HuIgG_0.03                            | feature_id[44].value > threshold=3298.333251953125 |
| node_78: feature_name=a-HuIgG_0.03                         | feature_id[1].value <= threshold=19665.666015625   |
| node_79: feature_name=SARS.CoV.2.S1.mFcTag                 | feature_id[0].value <= threshold=54010.166015625   |
| node_80: feature_name=SARS.CoV.2.S1+S2                     | feature_id[18].value <= threshold=48317.708984375  |
| node_81: feature_name=SARS.CoV.2.Spike.RBD.His.Bac         | feature_id[9].value > threshold=16347.4580078125   |

|                                                           |                                                     |
|-----------------------------------------------------------|-----------------------------------------------------|
| node_111: feature_name=hCoV.NL63.S1                       | feature_id[5].value > threshold=4866.533447265625   |
| node_123: feature_name=MERS.CoV.S1.RBD.367.606.rFcTag     | feature_id[3].value > threshold=2789.3416748046875  |
| node_161: feature_name=SARS.CoV.S1.HisTag                 | feature_id[14].value > threshold=4926.39990234375   |
| node_179: feature_name=hCoV.HKU1.S1_S2                    | feature_id[22].value <= threshold=48084.783203125   |
| node_180: feature_name=SARS.CoV.2.Spike.RBD.His.Bac       | feature_id[9].value > threshold=31607.125           |
| node_200: feature_name=SARS.CoV.2.S1.HisTag               | feature_id[16].value <= threshold=43902.201171875   |
| node_201: feature_name=Flu.H1N1.HA1+HA2                   | feature_id[6].value > threshold=30743.5             |
| node_205: feature_name=Flu.B_Phu/HA1                      | feature_id[11].value <= threshold=18442.14111328125 |
| Class: healthcare workers over 180 days after vaccination |                                                     |
|                                                           |                                                     |
| Rules_147                                                 | passed counts:1                                     |
| node_0: feature_name=HuIgG_0.03                           | feature_id[44].value > threshold=3298.333251953125  |
| node_78: feature_name=a-HuIgG_0.03                        | feature_id[1].value <= threshold=19665.666015625    |
| node_79: feature_name=SARS.CoV.2.S1.mFcTag                | feature_id[0].value <= threshold=54010.166015625    |
| node_80: feature_name=SARS.CoV.2.S1+S2                    | feature_id[18].value <= threshold=48317.708984375   |
| node_81: feature_name=SARS.CoV.2.Spike.RBD.His.Bac        | feature_id[9].value > threshold=16347.4580078125    |
| node_111: feature_name=hCoV.NL63.S1                       | feature_id[5].value > threshold=4866.533447265625   |
| node_123: feature_name=MERS.CoV.S1.RBD.367.606.rFcTag     | feature_id[3].value > threshold=2789.3416748046875  |
| node_161: feature_name=SARS.CoV.S1.HisTag                 | feature_id[14].value > threshold=4926.39990234375   |
| node_179: feature_name=hCoV.HKU1.S1_S2                    | feature_id[22].value <= threshold=48084.783203125   |
| node_180: feature_name=SARS.CoV.2.Spike.RBD.His.Bac       | feature_id[9].value > threshold=31607.125           |
| node_200: feature_name=SARS.CoV.2.S1.HisTag               | feature_id[16].value <= threshold=43902.201171875   |
| node_201: feature_name=Flu.H1N1.HA1+HA2                   | feature_id[6].value <= threshold=30743.5            |
| node_202: feature_name=a-HuIgG_0.30                       | feature_id[30].value <= threshold=42035.166015625   |
| Class: healthcare workers 60–180 days after vaccination   |                                                     |

|                                                           |                                                      |
|-----------------------------------------------------------|------------------------------------------------------|
|                                                           |                                                      |
| Rules_148                                                 | passed counts:1                                      |
| node_0: feature_name=HuIgG_0.03                           | feature_id[44].value > threshold=3298.333251953125   |
| node_78: feature_name=a-HuIgG_0.03                        | feature_id[1].value <= threshold=19665.666015625     |
| node_79: feature_name=SARS.CoV.2.S1.mFcTag                | feature_id[0].value <= threshold=54010.166015625     |
| node_80: feature_name=SARS.CoV.2.S1+S2                    | feature_id[18].value <= threshold=48317.708984375    |
| node_81: feature_name=SARS.CoV.2.Spike.RBD.His.Bac        | feature_id[9].value > threshold=16347.4580078125     |
| node_111: feature_name=hCoV.NL63.S1                       | feature_id[5].value > threshold=4866.533447265625    |
| node_123: feature_name=MERS.CoV.S1.RBD.367.606.rFcTag     | feature_id[3].value > threshold=2789.3416748046875   |
| node_161: feature_name=SARS.CoV.S1.HisTag                 | feature_id[14].value > threshold=4926.39990234375    |
| node_179: feature_name=hCoV.HKU1.S1_S2                    | feature_id[22].value <= threshold=48084.783203125    |
| node_180: feature_name=SARS.CoV.2.Spike.RBD.His.Bac       | feature_id[9].value <= threshold=31607.125           |
| node_181: feature_name=SARS.CoV.2.S1                      | feature_id[15].value > threshold=33718.333984375     |
| node_191: feature_name=a-HuIgA_0.30                       | feature_id[27].value > threshold=1819.5              |
| node_193: feature_name=HuIgM_0.30                         | feature_id[13].value <= threshold=1081.8333740234375 |
| node_194: feature_name=hCoV.NL63.S1                       | feature_id[5].value <= threshold=6020.75830078125    |
| Class: healthcare workers over 180 days after vaccination |                                                      |
|                                                           |                                                      |
| Rules_149                                                 | passed counts:1                                      |
| node_0: feature_name=HuIgG_0.03                           | feature_id[44].value > threshold=3298.333251953125   |
| node_78: feature_name=a-HuIgG_0.03                        | feature_id[1].value <= threshold=19665.666015625     |
| node_79: feature_name=SARS.CoV.2.S1.mFcTag                | feature_id[0].value <= threshold=54010.166015625     |
| node_80: feature_name=SARS.CoV.2.S1+S2                    | feature_id[18].value <= threshold=48317.708984375    |
| node_81: feature_name=SARS.CoV.2.Spike.RBD.His.Bac        | feature_id[9].value > threshold=16347.4580078125     |
| node_111: feature_name=hCoV.NL63.S1                       | feature_id[5].value > threshold=4866.533447265625    |

|                                                            |                                                      |
|------------------------------------------------------------|------------------------------------------------------|
| node_123: feature_name=MERS.CoV.S1.RBD.367.606.rFcTag      | feature_id[3].value > threshold=2789.3416748046875   |
| node_161: feature_name=SARS.CoV.S1.HisTag                  | feature_id[14].value > threshold=4926.39990234375    |
| node_179: feature_name=hCoV.HKU1.S1_S2                     | feature_id[22].value <= threshold=48084.783203125    |
| node_180: feature_name=SARS.CoV.2.Spike.RBD.His.Bac        | feature_id[9].value <= threshold=31607.125           |
| node_181: feature_name=SARS.CoV.2.S1                       | feature_id[15].value <= threshold=33718.333984375    |
| node_182: feature_name=a-HuIgG_0.03                        | feature_id[1].value <= threshold=15402.5             |
| node_183: feature_name=a-HuIgM_0.30                        | feature_id[32].value > threshold=1969.0000610351562  |
| node_185: feature_name=SARS.CoV.NP                         | feature_id[19].value <= threshold=1277.2083435058594 |
| Class: healthcare workers within 60 days after vaccination |                                                      |
|                                                            |                                                      |
| Rules_150                                                  | passed counts:1                                      |
| node_0: feature_name=HuIgG_0.03                            | feature_id[44].value > threshold=3298.333251953125   |
| node_78: feature_name=a-HuIgG_0.03                         | feature_id[1].value <= threshold=19665.666015625     |
| node_79: feature_name=SARS.CoV.2.S1.mFcTag                 | feature_id[0].value <= threshold=54010.166015625     |
| node_80: feature_name=SARS.CoV.2.S1+S2                     | feature_id[18].value <= threshold=48317.708984375    |
| node_81: feature_name=SARS.CoV.2.Spike.RBD.His.Bac         | feature_id[9].value > threshold=16347.4580078125     |
| node_111: feature_name=hCoV.NL63.S1                        | feature_id[5].value > threshold=4866.533447265625    |
| node_123: feature_name=MERS.CoV.S1.RBD.367.606.rFcTag      | feature_id[3].value > threshold=2789.3416748046875   |
| node_161: feature_name=SARS.CoV.S1.HisTag                  | feature_id[14].value <= threshold=4926.39990234375   |
| node_162: feature_name=a-MoIgA_0.10                        | feature_id[36].value <= threshold=3108.3333740234375 |
| node_163: feature_name=Flu.B_Mal/.HA1+HA2                  | feature_id[25].value > threshold=38684.7265625       |
| node_167: feature_name=SARS.CoV.NP                         | feature_id[19].value > threshold=18293.6826171875    |
| node_175: feature_name=Flu.B_Phu/.HA1                      | feature_id[11].value <= threshold=37557.841796875    |
| Class: healthcare workers 60–180 days after vaccination    |                                                      |
|                                                            |                                                      |

|                                                            |                                                      |
|------------------------------------------------------------|------------------------------------------------------|
| Rules_151                                                  | passed counts:1                                      |
| node_0: feature_name=HuIgG_0.03                            | feature_id[44].value > threshold=3298.333251953125   |
| node_78: feature_name=a-HuIgG_0.03                         | feature_id[1].value <= threshold=19665.666015625     |
| node_79: feature_name=SARS.CoV.2.S1.mFcTag                 | feature_id[0].value <= threshold=54010.166015625     |
| node_80: feature_name=SARS.CoV.2.S1+S2                     | feature_id[18].value <= threshold=48317.708984375    |
| node_81: feature_name=SARS.CoV.2.Spike.RBD.His.Bac         | feature_id[9].value > threshold=16347.4580078125     |
| node_111: feature_name=hCoV.NL63.S1                        | feature_id[5].value > threshold=4866.533447265625    |
| node_123: feature_name=MERS.CoV.S1.RBD.367.606.rFcTag      | feature_id[3].value > threshold=2789.3416748046875   |
| node_161: feature_name=SARS.CoV.S1.HisTag                  | feature_id[14].value <= threshold=4926.39990234375   |
| node_162: feature_name=a-MoIgA_0.10                        | feature_id[36].value <= threshold=3108.3333740234375 |
| node_163: feature_name=Flu.B_Mal/.HA1+HA2                  | feature_id[25].value > threshold=38684.7265625       |
| node_167: feature_name=SARS.CoV.NP                         | feature_id[19].value <= threshold=18293.6826171875   |
| node_168: feature_name=a-HuIgG_0.03                        | feature_id[1].value > threshold=10603.0              |
| node_172: feature_name=a-HuIgM_0.30                        | feature_id[32].value > threshold=29969.8330078125    |
| Class: healthcare workers within 60 days after vaccination |                                                      |
|                                                            |                                                      |
| Rules_152                                                  | passed counts:1                                      |
| node_0: feature_name=HuIgG_0.03                            | feature_id[44].value > threshold=3298.333251953125   |
| node_78: feature_name=a-HuIgG_0.03                         | feature_id[1].value <= threshold=19665.666015625     |
| node_79: feature_name=SARS.CoV.2.S1.mFcTag                 | feature_id[0].value <= threshold=54010.166015625     |
| node_80: feature_name=SARS.CoV.2.S1+S2                     | feature_id[18].value <= threshold=48317.708984375    |
| node_81: feature_name=SARS.CoV.2.Spike.RBD.His.Bac         | feature_id[9].value > threshold=16347.4580078125     |
| node_111: feature_name=hCoV.NL63.S1                        | feature_id[5].value > threshold=4866.533447265625    |
| node_123: feature_name=MERS.CoV.S1.RBD.367.606.rFcTag      | feature_id[3].value > threshold=2789.3416748046875   |
| node_161: feature_name=SARS.CoV.S1.HisTag                  | feature_id[14].value <= threshold=4926.39990234375   |

|                                                            |                                                      |
|------------------------------------------------------------|------------------------------------------------------|
| node_162: feature_name=a-MoIgA_0.10                        | feature_id[36].value <= threshold=3108.3333740234375 |
| node_163: feature_name=Flu.B_Mal/.HA1+HA2                  | feature_id[25].value <= threshold=38684.7265625      |
| node_164: feature_name=a-MoIgA_0.30                        | feature_id[35].value > threshold=7878.1668701171875  |
| Class: healthcare workers 60–180 days after vaccination    |                                                      |
|                                                            |                                                      |
| Rules_153                                                  | passed counts:1                                      |
| node_0: feature_name=HuIgG_0.03                            | feature_id[44].value > threshold=3298.333251953125   |
| node_78: feature_name=a-HuIgG_0.03                         | feature_id[1].value <= threshold=19665.666015625     |
| node_79: feature_name=SARS.CoV.2.S1.mFcTag                 | feature_id[0].value <= threshold=54010.166015625     |
| node_80: feature_name=SARS.CoV.2.S1+S2                     | feature_id[18].value <= threshold=48317.708984375    |
| node_81: feature_name=SARS.CoV.2.Spike.RBD.His.Bac         | feature_id[9].value > threshold=16347.4580078125     |
| node_111: feature_name=hCoV.NL63.S1                        | feature_id[5].value > threshold=4866.533447265625    |
| node_123: feature_name=MERS.CoV.S1.RBD.367.606.rFcTag      | feature_id[3].value <= threshold=2789.3416748046875  |
| node_124: feature_name=SARS.CoV.2.S1+S2                    | feature_id[18].value > threshold=41798.25            |
| node_140: feature_name=SARS.CoV.2.S1.RBD.mFc               | feature_id[17].value <= threshold=44491.166015625    |
| node_141: feature_name=a-HuIgM_0.03                        | feature_id[34].value > threshold=-6.833333492279053  |
| node_149: feature_name=a-MoIgA_0.30                        | feature_id[35].value > threshold=935.3333435058594   |
| node_151: feature_name=HuIgM_0.30                          | feature_id[13].value <= threshold=1110.5             |
| node_152: feature_name=a-HuIgG_0.30                        | feature_id[30].value > threshold=46032.0             |
| node_154: feature_name=a-MoIgM_0.03                        | feature_id[41].value > threshold=1308.5              |
| Class: healthcare workers within 60 days after vaccination |                                                      |
|                                                            |                                                      |
| Rules_154                                                  | passed counts:1                                      |
| node_0: feature_name=HuIgG_0.03                            | feature_id[44].value > threshold=3298.333251953125   |
| node_78: feature_name=a-HuIgG_0.03                         | feature_id[1].value <= threshold=19665.666015625     |

|                                                         |                                                      |
|---------------------------------------------------------|------------------------------------------------------|
| node_79: feature_name=SARS.CoV.2.S1.mFcTag              | feature_id[0].value <= threshold=54010.166015625     |
| node_80: feature_name=SARS.CoV.2.S1+S2                  | feature_id[18].value <= threshold=48317.708984375    |
| node_81: feature_name=SARS.CoV.2.Spike.RBD.His.Bac      | feature_id[9].value > threshold=16347.4580078125     |
| node_111: feature_name=hCoV.NL63.S1                     | feature_id[5].value > threshold=4866.533447265625    |
| node_123: feature_name=MERS.CoV.S1.RBD.367.606.rFcTag   | feature_id[3].value <= threshold=2789.3416748046875  |
| node_124: feature_name=SARS.CoV.2.S1+S2                 | feature_id[18].value > threshold=41798.25            |
| node_140: feature_name=SARS.CoV.2.S1.RBD.mFc            | feature_id[17].value <= threshold=44491.166015625    |
| node_141: feature_name=a-HuIgM_0.03                     | feature_id[34].value > threshold=-6.833333492279053  |
| node_149: feature_name=a-MoIgA_0.30                     | feature_id[35].value > threshold=935.3333435058594   |
| node_151: feature_name=HuIgM_0.30                       | feature_id[13].value <= threshold=1110.5             |
| node_152: feature_name=a-HuIgG_0.30                     | feature_id[30].value > threshold=46032.0             |
| node_154: feature_name=a-MoIgM_0.03                     | feature_id[41].value <= threshold=1308.5             |
| Class: healthcare workers 60–180 days after vaccination |                                                      |
|                                                         |                                                      |
| Rules_155                                               | passed counts:1                                      |
| node_0: feature_name=HuIgG_0.03                         | feature_id[44].value > threshold=3298.333251953125   |
| node_78: feature_name=a-HuIgG_0.03                      | feature_id[1].value <= threshold=19665.666015625     |
| node_79: feature_name=SARS.CoV.2.S1.mFcTag              | feature_id[0].value <= threshold=54010.166015625     |
| node_80: feature_name=SARS.CoV.2.S1+S2                  | feature_id[18].value <= threshold=48317.708984375    |
| node_81: feature_name=SARS.CoV.2.Spike.RBD.His.Bac      | feature_id[9].value > threshold=16347.4580078125     |
| node_111: feature_name=hCoV.NL63.S1                     | feature_id[5].value > threshold=4866.533447265625    |
| node_123: feature_name=MERS.CoV.S1.RBD.367.606.rFcTag   | feature_id[3].value <= threshold=2789.3416748046875  |
| node_124: feature_name=SARS.CoV.2.S1+S2                 | feature_id[18].value > threshold=41798.25            |
| node_140: feature_name=SARS.CoV.2.S1.RBD.mFc            | feature_id[17].value <= threshold=44491.166015625    |
| node_141: feature_name=a-HuIgM_0.03                     | feature_id[34].value <= threshold=-6.833333492279053 |

|                                                            |                                                      |
|------------------------------------------------------------|------------------------------------------------------|
| node_142: feature_name=hCoV.OC43.HE                        | feature_id[10].value > threshold=7956.5              |
| node_144: feature_name=SARS.CoV.2.S1.mFcTag                | feature_id[0].value > threshold=52734.0              |
| Class: healthcare workers within 60 days after vaccination |                                                      |
|                                                            |                                                      |
| Rules_156                                                  | passed counts:1                                      |
| node_0: feature_name=HuIgG_0.03                            | feature_id[44].value > threshold=3298.333251953125   |
| node_78: feature_name=a-HuIgG_0.03                         | feature_id[1].value <= threshold=19665.666015625     |
| node_79: feature_name=SARS.CoV.2.S1.mFcTag                 | feature_id[0].value <= threshold=54010.166015625     |
| node_80: feature_name=SARS.CoV.2.S1+S2                     | feature_id[18].value <= threshold=48317.708984375    |
| node_81: feature_name=SARS.CoV.2.Spike.RBD.His.Bac         | feature_id[9].value > threshold=16347.4580078125     |
| node_111: feature_name=hCoV.NL63.S1                        | feature_id[5].value > threshold=4866.533447265625    |
| node_123: feature_name=MERS.CoV.S1.RBD.367.606.rFcTag      | feature_id[3].value <= threshold=2789.3416748046875  |
| node_124: feature_name=SARS.CoV.2.S1+S2                    | feature_id[18].value > threshold=41798.25            |
| node_140: feature_name=SARS.CoV.2.S1.RBD.mFc               | feature_id[17].value <= threshold=44491.166015625    |
| node_141: feature_name=a-HuIgM_0.03                        | feature_id[34].value <= threshold=-6.833333492279053 |
| node_142: feature_name=hCoV.OC43.HE                        | feature_id[10].value > threshold=7956.5              |
| node_144: feature_name=SARS.CoV.2.S1.mFcTag                | feature_id[0].value <= threshold=52734.0             |
| node_145: feature_name=Flu.H1N1.HA1                        | feature_id[26].value <= threshold=26772.75           |
| Class: healthcare workers within 60 days after vaccination |                                                      |
|                                                            |                                                      |
| Rules_157                                                  | passed counts:1                                      |
| node_0: feature_name=HuIgG_0.03                            | feature_id[44].value > threshold=3298.333251953125   |
| node_78: feature_name=a-HuIgG_0.03                         | feature_id[1].value <= threshold=19665.666015625     |
| node_79: feature_name=SARS.CoV.2.S1.mFcTag                 | feature_id[0].value <= threshold=54010.166015625     |
| node_80: feature_name=SARS.CoV.2.S1+S2                     | feature_id[18].value <= threshold=48317.708984375    |



|                                                            |                                                     |
|------------------------------------------------------------|-----------------------------------------------------|
| node_81: feature_name=SARS.CoV.2.Spike.RBD.His.Bac         | feature_id[9].value > threshold=16347.4580078125    |
| node_111: feature_name=hCoV.NL63.S1                        | feature_id[5].value > threshold=4866.533447265625   |
| node_123: feature_name=MERS.CoV.S1.RBD.367.606.rFcTag      | feature_id[3].value <= threshold=2789.3416748046875 |
| node_124: feature_name=SARS.CoV.2.S1+S2                    | feature_id[18].value <= threshold=41798.25          |
| node_125: feature_name=hCoV.OC43.S1_S2ECD.HisTag           | feature_id[24].value <= threshold=49554.1328125     |
| node_126: feature_name=SARS.CoV.2.Spike.RBD.His.Bac        | feature_id[9].value > threshold=23295.4169921875    |
| node_130: feature_name=Flu.H1N1.HA1                        | feature_id[26].value > threshold=30553.0            |
| node_134: feature_name=MERS.CoV.S1.RBD.367.606.rFcTag      | feature_id[3].value > threshold=983.2499694824219   |
| node_136: feature_name=a-MoIgA_0.03                        | feature_id[37].value > threshold=503.50001525878906 |
| Class: healthcare workers over 180 days after vaccination  |                                                     |
|                                                            |                                                     |
| Rules_158                                                  | passed counts:1                                     |
| node_0: feature_name=HuIgG_0.03                            | feature_id[44].value > threshold=3298.333251953125  |
| node_78: feature_name=a-HuIgG_0.03                         | feature_id[1].value <= threshold=19665.666015625    |
| node_79: feature_name=SARS.CoV.2.S1.mFcTag                 | feature_id[0].value <= threshold=54010.166015625    |
| node_80: feature_name=SARS.CoV.2.S1+S2                     | feature_id[18].value <= threshold=48317.708984375   |
| node_81: feature_name=SARS.CoV.2.Spike.RBD.His.Bac         | feature_id[9].value > threshold=16347.4580078125    |
| node_111: feature_name=hCoV.NL63.S1                        | feature_id[5].value > threshold=4866.533447265625   |
| node_123: feature_name=MERS.CoV.S1.RBD.367.606.rFcTag      | feature_id[3].value <= threshold=2789.3416748046875 |
| node_124: feature_name=SARS.CoV.2.S1+S2                    | feature_id[18].value <= threshold=41798.25          |
| node_125: feature_name=hCoV.OC43.S1_S2ECD.HisTag           | feature_id[24].value <= threshold=49554.1328125     |
| node_126: feature_name=SARS.CoV.2.Spike.RBD.His.Bac        | feature_id[9].value > threshold=23295.4169921875    |
| node_130: feature_name=Flu.H1N1.HA1                        | feature_id[26].value > threshold=30553.0            |
| node_134: feature_name=MERS.CoV.S1.RBD.367.606.rFcTag      | feature_id[3].value <= threshold=983.2499694824219  |
| Class: healthcare workers within 60 days after vaccination |                                                     |

|                                                         |                                                     |
|---------------------------------------------------------|-----------------------------------------------------|
| Rules_159                                               | passed counts:1                                     |
| node_0: feature_name=HuIgG_0.03                         | feature_id[44].value > threshold=3298.333251953125  |
| node_78: feature_name=a-HuIgG_0.03                      | feature_id[1].value <= threshold=19665.666015625    |
| node_79: feature_name=SARS.CoV.2.S1.mFcTag              | feature_id[0].value <= threshold=54010.166015625    |
| node_80: feature_name=SARS.CoV.2.S1+S2                  | feature_id[18].value <= threshold=48317.708984375   |
| node_81: feature_name=SARS.CoV.2.Spike.RBD.His.Bac      | feature_id[9].value > threshold=16347.4580078125    |
| node_111: feature_name=hCoV.NL63.S1                     | feature_id[5].value > threshold=4866.533447265625   |
| node_123: feature_name=MERS.CoV.S1.RBD.367.606.rFcTag   | feature_id[3].value <= threshold=2789.3416748046875 |
| node_124: feature_name=SARS.CoV.2.S1+S2                 | feature_id[18].value <= threshold=41798.25          |
| node_125: feature_name=hCoV.OC43.S1_S2ECD.HisTag        | feature_id[24].value <= threshold=49554.1328125     |
| node_126: feature_name=SARS.CoV.2.Spike.RBD.His.Bac     | feature_id[9].value > threshold=23295.4169921875    |
| node_130: feature_name=Flu.H1N1.HA1                     | feature_id[26].value <= threshold=30553.0           |
| node_131: feature_name=MERS.CoV.S1.ECD.1-1297.HisTag    | feature_id[12].value <= threshold=13902.69140625    |
| Class: healthcare workers 60–180 days after vaccination |                                                     |
| Rules_160                                               | passed counts:1                                     |
| node_0: feature_name=HuIgG_0.03                         | feature_id[44].value > threshold=3298.333251953125  |
| node_78: feature_name=a-HuIgG_0.03                      | feature_id[1].value <= threshold=19665.666015625    |
| node_79: feature_name=SARS.CoV.2.S1.mFcTag              | feature_id[0].value <= threshold=54010.166015625    |
| node_80: feature_name=SARS.CoV.2.S1+S2                  | feature_id[18].value <= threshold=48317.708984375   |
| node_81: feature_name=SARS.CoV.2.Spike.RBD.His.Bac      | feature_id[9].value > threshold=16347.4580078125    |
| node_111: feature_name=hCoV.NL63.S1                     | feature_id[5].value <= threshold=4866.533447265625  |
| node_112: feature_name=SARS.CoV.2.S1.mFcTag             | feature_id[0].value > threshold=40690.80078125      |
| node_116: feature_name=a-MoIgG_0.10                     | feature_id[38].value > threshold=2424.6666259765625 |

|                                                         |                                                     |
|---------------------------------------------------------|-----------------------------------------------------|
| node_118: feature_name=DcCoV.HKU23.NP                   | feature_id[21].value > threshold=3458.25            |
| node_120: feature_name=hCoV.OC43.S1_S2ECD.HisTag        | feature_id[24].value > threshold=48433.232421875    |
| Class: healthcare workers 60–180 days after vaccination |                                                     |
|                                                         |                                                     |
| Rules_161                                               | passed counts:1                                     |
| node_0: feature_name=HuIgG_0.03                         | feature_id[44].value > threshold=3298.333251953125  |
| node_78: feature_name=a-HuIgG_0.03                      | feature_id[1].value <= threshold=19665.666015625    |
| node_79: feature_name=SARS.CoV.2.S1.mFcTag              | feature_id[0].value <= threshold=54010.166015625    |
| node_80: feature_name=SARS.CoV.2.S1+S2                  | feature_id[18].value <= threshold=48317.708984375   |
| node_81: feature_name=SARS.CoV.2.Spike.RBD.His.Bac      | feature_id[9].value > threshold=16347.4580078125    |
| node_111: feature_name=hCoV.NL63.S1                     | feature_id[5].value <= threshold=4866.533447265625  |
| node_112: feature_name=SARS.CoV.2.S1.mFcTag             | feature_id[0].value > threshold=40690.80078125      |
| node_116: feature_name=a-MoIgG_0.10                     | feature_id[38].value > threshold=2424.6666259765625 |
| node_118: feature_name=DcCoV.HKU23.NP                   | feature_id[21].value <= threshold=3458.25           |
| Class: healthcare workers 60–180 days after vaccination |                                                     |
|                                                         |                                                     |
| Rules_162                                               | passed counts:1                                     |
| node_0: feature_name=HuIgG_0.03                         | feature_id[44].value > threshold=3298.333251953125  |
| node_78: feature_name=a-HuIgG_0.03                      | feature_id[1].value <= threshold=19665.666015625    |
| node_79: feature_name=SARS.CoV.2.S1.mFcTag              | feature_id[0].value <= threshold=54010.166015625    |
| node_80: feature_name=SARS.CoV.2.S1+S2                  | feature_id[18].value <= threshold=48317.708984375   |
| node_81: feature_name=SARS.CoV.2.Spike.RBD.His.Bac      | feature_id[9].value > threshold=16347.4580078125    |
| node_111: feature_name=hCoV.NL63.S1                     | feature_id[5].value <= threshold=4866.533447265625  |
| node_112: feature_name=SARS.CoV.2.S1.mFcTag             | feature_id[0].value <= threshold=40690.80078125     |
| node_113: feature_name=a-HuIgM_0.30                     | feature_id[32].value <= threshold=1087.5            |

|                                                            |                                                      |
|------------------------------------------------------------|------------------------------------------------------|
| Class: healthcare workers over 180 days after vaccination  |                                                      |
|                                                            |                                                      |
| Rules_163                                                  | passed counts:1                                      |
| node_0: feature_name=HuIgG_0.03                            | feature_id[44].value > threshold=3298.333251953125   |
| node_78: feature_name=a-HuIgG_0.03                         | feature_id[1].value <= threshold=19665.666015625     |
| node_79: feature_name=SARS.CoV.2.S1.mFcTag                 | feature_id[0].value <= threshold=54010.166015625     |
| node_80: feature_name=SARS.CoV.2.S1+S2                     | feature_id[18].value <= threshold=48317.708984375    |
| node_81: feature_name=SARS.CoV.2.Spike.RBD.His.Bac         | feature_id[9].value <= threshold=16347.4580078125    |
| node_82: feature_name=SARS.CoV.2.S1                        | feature_id[15].value > threshold=2844.6334228515625  |
| node_90: feature_name=a-MoIgG_0.10                         | feature_id[38].value > threshold=1482.3333129882812  |
| node_98: feature_name=Flu.H1N1.HA1                         | feature_id[26].value > threshold=52934.66015625      |
| node_108: feature_name=a-MoIgA_0.03                        | feature_id[37].value <= threshold=26.999999046325684 |
| Class: healthcare workers within 60 days after vaccination |                                                      |
|                                                            |                                                      |
| Rules_164                                                  | passed counts:1                                      |
| node_0: feature_name=HuIgG_0.03                            | feature_id[44].value > threshold=3298.333251953125   |
| node_78: feature_name=a-HuIgG_0.03                         | feature_id[1].value <= threshold=19665.666015625     |
| node_79: feature_name=SARS.CoV.2.S1.mFcTag                 | feature_id[0].value <= threshold=54010.166015625     |
| node_80: feature_name=SARS.CoV.2.S1+S2                     | feature_id[18].value <= threshold=48317.708984375    |
| node_81: feature_name=SARS.CoV.2.Spike.RBD.His.Bac         | feature_id[9].value <= threshold=16347.4580078125    |
| node_82: feature_name=SARS.CoV.2.S1                        | feature_id[15].value > threshold=2844.6334228515625  |
| node_90: feature_name=a-MoIgG_0.10                         | feature_id[38].value > threshold=1482.3333129882812  |
| node_98: feature_name=Flu.H1N1.HA1                         | feature_id[26].value <= threshold=52934.66015625     |
| node_99: feature_name=Flu.B_Phu/.HA1                       | feature_id[11].value > threshold=27915.5419921875    |
| node_105: feature_name=SARS.CoV.NP                         | feature_id[19].value <= threshold=310.9027671813965  |

|                                                         |                                                      |
|---------------------------------------------------------|------------------------------------------------------|
| Class: unvaccinated healthcare workers                  |                                                      |
|                                                         |                                                      |
| Rules_165                                               | passed counts:1                                      |
| node_0: feature_name=HuIgG_0.03                         | feature_id[44].value > threshold=3298.333251953125   |
| node_78: feature_name=a-HuIgG_0.03                      | feature_id[1].value <= threshold=19665.666015625     |
| node_79: feature_name=SARS.CoV.2.S1.mFcTag              | feature_id[0].value <= threshold=54010.166015625     |
| node_80: feature_name=SARS.CoV.2.S1+S2                  | feature_id[18].value <= threshold=48317.708984375    |
| node_81: feature_name=SARS.CoV.2.Spike.RBD.His.Bac      | feature_id[9].value <= threshold=16347.4580078125    |
| node_82: feature_name=SARS.CoV.2.S1                     | feature_id[15].value > threshold=2844.6334228515625  |
| node_90: feature_name=a-MoIgG_0.10                      | feature_id[38].value > threshold=1482.3333129882812  |
| node_98: feature_name=Flu.H1N1.HA1                      | feature_id[26].value <= threshold=52934.66015625     |
| node_99: feature_name=Flu.B_Phu/.HA1                    | feature_id[11].value <= threshold=27915.5419921875   |
| node_100: feature_name=hCoV.229E.S1                     | feature_id[2].value <= threshold=33022.865234375     |
| node_101: feature_name=SARS.CoV.2.S1.mFcTag             | feature_id[0].value > threshold=25623.3671875        |
| Class: healthcare workers 60–180 days after vaccination |                                                      |
|                                                         |                                                      |
| Rules_166                                               | passed counts:1                                      |
| node_0: feature_name=HuIgG_0.03                         | feature_id[44].value > threshold=3298.333251953125   |
| node_78: feature_name=a-HuIgG_0.03                      | feature_id[1].value <= threshold=19665.666015625     |
| node_79: feature_name=SARS.CoV.2.S1.mFcTag              | feature_id[0].value <= threshold=54010.166015625     |
| node_80: feature_name=SARS.CoV.2.S1+S2                  | feature_id[18].value <= threshold=48317.708984375    |
| node_81: feature_name=SARS.CoV.2.Spike.RBD.His.Bac      | feature_id[9].value <= threshold=16347.4580078125    |
| node_82: feature_name=SARS.CoV.2.S1                     | feature_id[15].value > threshold=2844.6334228515625  |
| node_90: feature_name=a-MoIgG_0.10                      | feature_id[38].value <= threshold=1482.3333129882812 |
| node_91: feature_name=SARS.CoV.2.Spike.RBD.rFc          | feature_id[7].value <= threshold=6995.25             |

|                                                            |                                                      |
|------------------------------------------------------------|------------------------------------------------------|
| node_92: feature_name=SARS.CoV.2.Spike.RBD.rFc             | feature_id[7].value > threshold=210.11111068725586   |
| node_94: feature_name=a-HuIgM_0.30                         | feature_id[32].value > threshold=1457.0              |
| Class: healthcare workers within 60 days after vaccination |                                                      |
|                                                            |                                                      |
| Rules_167                                                  | passed counts:1                                      |
| node_0: feature_name=HuIgG_0.03                            | feature_id[44].value > threshold=3298.333251953125   |
| node_78: feature_name=a-HuIgG_0.03                         | feature_id[1].value <= threshold=19665.666015625     |
| node_79: feature_name=SARS.CoV.2.S1.mFcTag                 | feature_id[0].value <= threshold=54010.166015625     |
| node_80: feature_name=SARS.CoV.2.S1+S2                     | feature_id[18].value <= threshold=48317.708984375    |
| node_81: feature_name=SARS.CoV.2.Spike.RBD.His.Bac         | feature_id[9].value <= threshold=16347.4580078125    |
| node_82: feature_name=SARS.CoV.2.S1                        | feature_id[15].value > threshold=2844.6334228515625  |
| node_90: feature_name=a-MoIgG_0.10                         | feature_id[38].value <= threshold=1482.3333129882812 |
| node_91: feature_name=SARS.CoV.2.Spike.RBD.rFc             | feature_id[7].value <= threshold=6995.25             |
| node_92: feature_name=SARS.CoV.2.Spike.RBD.rFc             | feature_id[7].value > threshold=210.11111068725586   |
| node_94: feature_name=a-HuIgM_0.30                         | feature_id[32].value <= threshold=1457.0             |
| Class: healthcare workers 60–180 days after vaccination    |                                                      |
|                                                            |                                                      |
| Rules_168                                                  | passed counts:1                                      |
| node_0: feature_name=HuIgG_0.03                            | feature_id[44].value > threshold=3298.333251953125   |
| node_78: feature_name=a-HuIgG_0.03                         | feature_id[1].value <= threshold=19665.666015625     |
| node_79: feature_name=SARS.CoV.2.S1.mFcTag                 | feature_id[0].value <= threshold=54010.166015625     |
| node_80: feature_name=SARS.CoV.2.S1+S2                     | feature_id[18].value <= threshold=48317.708984375    |
| node_81: feature_name=SARS.CoV.2.Spike.RBD.His.Bac         | feature_id[9].value <= threshold=16347.4580078125    |
| node_82: feature_name=SARS.CoV.2.S1                        | feature_id[15].value > threshold=2844.6334228515625  |
| node_90: feature_name=a-MoIgG_0.10                         | feature_id[38].value <= threshold=1482.3333129882812 |

|                                                         |                                                       |
|---------------------------------------------------------|-------------------------------------------------------|
| node_91: feature_name=SARS.CoV.2.Spike.RBD.rFc          | feature_id[7].value <= threshold=6995.25              |
| node_92: feature_name=SARS.CoV.2.Spike.RBD.rFc          | feature_id[7].value <= threshold=210.11111068725586   |
| Class: unvaccinated healthcare workers                  |                                                       |
|                                                         |                                                       |
| Rules_169                                               | passed counts:1                                       |
| node_0: feature_name=HuIgG_0.03                         | feature_id[44].value > threshold=3298.333251953125    |
| node_78: feature_name=a-HuIgG_0.03                      | feature_id[1].value <= threshold=19665.666015625      |
| node_79: feature_name=SARS.CoV.2.S1.mFcTag              | feature_id[0].value <= threshold=54010.166015625      |
| node_80: feature_name=SARS.CoV.2.S1+S2                  | feature_id[18].value <= threshold=48317.708984375     |
| node_81: feature_name=SARS.CoV.2.Spike.RBD.His.Bac      | feature_id[9].value <= threshold=16347.4580078125     |
| node_82: feature_name=SARS.CoV.2.S1                     | feature_id[15].value <= threshold=2844.6334228515625  |
| node_83: feature_name=SARS.CoV.2.S1+S2                  | feature_id[18].value <= threshold=3298.25             |
| node_84: feature_name=hCoV.OC43.HE                      | feature_id[10].value <= threshold=-45.900001525878906 |
| node_85: feature_name=SARS.CoV.2.Spike.RBD.His.Bac      | feature_id[9].value > threshold=-318.49999237060547   |
| Class: healthcare workers 60–180 days after vaccination |                                                       |
|                                                         |                                                       |
| Rules_170                                               | passed counts:1                                       |
| node_0: feature_name=HuIgG_0.03                         | feature_id[44].value > threshold=3298.333251953125    |
| node_78: feature_name=a-HuIgG_0.03                      | feature_id[1].value <= threshold=19665.666015625      |
| node_79: feature_name=SARS.CoV.2.S1.mFcTag              | feature_id[0].value <= threshold=54010.166015625      |
| node_80: feature_name=SARS.CoV.2.S1+S2                  | feature_id[18].value <= threshold=48317.708984375     |
| node_81: feature_name=SARS.CoV.2.Spike.RBD.His.Bac      | feature_id[9].value <= threshold=16347.4580078125     |
| node_82: feature_name=SARS.CoV.2.S1                     | feature_id[15].value <= threshold=2844.6334228515625  |
| node_83: feature_name=SARS.CoV.2.S1+S2                  | feature_id[18].value <= threshold=3298.25             |
| node_84: feature_name=hCoV.OC43.HE                      | feature_id[10].value <= threshold=-45.900001525878906 |

|                                                           |                                                      |
|-----------------------------------------------------------|------------------------------------------------------|
| node_85: feature_name=SARS.CoV.2.Spike.RBD.His.Bac        | feature_id[9].value <= threshold=-318.49999237060547 |
| Class: healthcare workers over 180 days after vaccination |                                                      |
|                                                           |                                                      |
| Rules_171                                                 | passed counts:1                                      |
| node_0: feature_name=HuIgG_0.03                           | feature_id[44].value <= threshold=3298.333251953125  |
| node_1: feature_name=SARS.CoV.2.S1.mFcTag                 | feature_id[0].value > threshold=5354.388916015625    |
| node_9: feature_name=HuIgM_0.03                           | feature_id[45].value > threshold=-80.66666793823242  |
| node_27: feature_name=HuIgM_0.03                          | feature_id[45].value > threshold=61.33333206176758   |
| node_75: feature_name=HuIgA_0.10                          | feature_id[42].value > threshold=1386.3333435058594  |
| Class: healthcare workers 60–180 days after vaccination   |                                                      |
|                                                           |                                                      |
| Rules_172                                                 | passed counts:1                                      |
| node_0: feature_name=HuIgG_0.03                           | feature_id[44].value <= threshold=3298.333251953125  |
| node_1: feature_name=SARS.CoV.2.S1.mFcTag                 | feature_id[0].value > threshold=5354.388916015625    |
| node_9: feature_name=HuIgM_0.03                           | feature_id[45].value > threshold=-80.66666793823242  |
| node_27: feature_name=HuIgM_0.03                          | feature_id[45].value <= threshold=61.33333206176758  |
| node_28: feature_name=a-HuIgG_0.30                        | feature_id[30].value > threshold=34878.66796875      |
| node_64: feature_name=a-HuIgG_0.03                        | feature_id[1].value > threshold=9340.3330078125      |
| node_68: feature_name=a-HuIgA_0.30                        | feature_id[27].value > threshold=1918.1666870117188  |
| node_72: feature_name=HuIgM_0.03                          | feature_id[45].value > threshold=20.333333492279053  |
| Class: healthcare workers 60–180 days after vaccination   |                                                      |
|                                                           |                                                      |
| Rules_173                                                 | passed counts:1                                      |
| node_0: feature_name=HuIgG_0.03                           | feature_id[44].value <= threshold=3298.333251953125  |
| node_1: feature_name=SARS.CoV.2.S1.mFcTag                 | feature_id[0].value > threshold=5354.388916015625    |



|                                                           |                                                      |
|-----------------------------------------------------------|------------------------------------------------------|
| node_9: feature_name=HuIgM_0.03                           | feature_id[45].value > threshold=-80.66666793823242  |
| node_27: feature_name=HuIgM_0.03                          | feature_id[45].value <= threshold=61.33333206176758  |
| node_28: feature_name=a-HuIgG_0.30                        | feature_id[30].value > threshold=34878.66796875      |
| node_64: feature_name=a-HuIgG_0.03                        | feature_id[1].value > threshold=9340.3330078125      |
| node_68: feature_name=a-HuIgA_0.30                        | feature_id[27].value <= threshold=1918.1666870117188 |
| node_69: feature_name=SARS.CoV.2.Spike.RBD.rFc            | feature_id[7].value <= threshold=20694.49951171875   |
| Class: healthcare workers over 180 days after vaccination |                                                      |
|                                                           |                                                      |
| Rules_174                                                 | passed counts:1                                      |
| node_0: feature_name=HuIgG_0.03                           | feature_id[44].value <= threshold=3298.333251953125  |
| node_1: feature_name=SARS.CoV.2.S1.mFcTag                 | feature_id[0].value > threshold=5354.388916015625    |
| node_9: feature_name=HuIgM_0.03                           | feature_id[45].value > threshold=-80.66666793823242  |
| node_27: feature_name=HuIgM_0.03                          | feature_id[45].value <= threshold=61.33333206176758  |
| node_28: feature_name=a-HuIgG_0.30                        | feature_id[30].value <= threshold=34878.66796875     |
| node_29: feature_name=HuIgG_0.03                          | feature_id[44].value > threshold=769.8333435058594   |
| node_35: feature_name=SARS.CoV.S1.HisTag                  | feature_id[14].value > threshold=400.3000030517578   |
| node_39: feature_name=hCoV.HKU1.S1_S2                     | feature_id[22].value > threshold=42662.666015625     |
| node_61: feature_name=SARS.CoV.2.S1.HisTag                | feature_id[16].value > threshold=41690.958984375     |
| Class: healthcare workers 60–180 days after vaccination   |                                                      |
|                                                           |                                                      |
| Rules_175                                                 | passed counts:1                                      |
| node_0: feature_name=HuIgG_0.03                           | feature_id[44].value <= threshold=3298.333251953125  |
| node_1: feature_name=SARS.CoV.2.S1.mFcTag                 | feature_id[0].value > threshold=5354.388916015625    |
| node_9: feature_name=HuIgM_0.03                           | feature_id[45].value > threshold=-80.66666793823242  |
| node_27: feature_name=HuIgM_0.03                          | feature_id[45].value <= threshold=61.33333206176758  |

|                                                           |                                                     |
|-----------------------------------------------------------|-----------------------------------------------------|
| node_28: feature_name=a-HuIgG_0.30                        | feature_id[30].value <= threshold=34878.66796875    |
| node_29: feature_name=HuIgG_0.03                          | feature_id[44].value > threshold=769.8333435058594  |
| node_35: feature_name=SARS.CoV.S1.HisTag                  | feature_id[14].value > threshold=400.3000030517578  |
| node_39: feature_name=hCoV.HKU1.S1_S2                     | feature_id[22].value <= threshold=42662.666015625   |
| node_40: feature_name=Flu.B_Phu/.HA1                      | feature_id[11].value > threshold=49118.416015625    |
| Class: healthcare workers over 180 days after vaccination |                                                     |
|                                                           |                                                     |
| Rules_176                                                 | passed counts:1                                     |
| node_0: feature_name=HuIgG_0.03                           | feature_id[44].value <= threshold=3298.333251953125 |
| node_1: feature_name=SARS.CoV.2.S1.mFcTag                 | feature_id[0].value > threshold=5354.388916015625   |
| node_9: feature_name=HuIgM_0.03                           | feature_id[45].value > threshold=-80.66666793823242 |
| node_27: feature_name=HuIgM_0.03                          | feature_id[45].value <= threshold=61.33333206176758 |
| node_28: feature_name=a-HuIgG_0.30                        | feature_id[30].value <= threshold=34878.66796875    |
| node_29: feature_name=HuIgG_0.03                          | feature_id[44].value > threshold=769.8333435058594  |
| node_35: feature_name=SARS.CoV.S1.HisTag                  | feature_id[14].value > threshold=400.3000030517578  |
| node_39: feature_name=hCoV.HKU1.S1_S2                     | feature_id[22].value <= threshold=42662.666015625   |
| node_40: feature_name=Flu.B_Phu/.HA1                      | feature_id[11].value <= threshold=49118.416015625   |
| node_41: feature_name=hCoV.OC43.HE                        | feature_id[10].value > threshold=25184.06640625     |
| Class: healthcare workers over 180 days after vaccination |                                                     |
|                                                           |                                                     |
| Rules_177                                                 | passed counts:1                                     |
| node_0: feature_name=HuIgG_0.03                           | feature_id[44].value <= threshold=3298.333251953125 |
| node_1: feature_name=SARS.CoV.2.S1.mFcTag                 | feature_id[0].value > threshold=5354.388916015625   |
| node_9: feature_name=HuIgM_0.03                           | feature_id[45].value > threshold=-80.66666793823242 |
| node_27: feature_name=HuIgM_0.03                          | feature_id[45].value <= threshold=61.33333206176758 |

|                                                            |                                                     |
|------------------------------------------------------------|-----------------------------------------------------|
| node_28: feature_name=a-HuIgG_0.30                         | feature_id[30].value <= threshold=34878.66796875    |
| node_29: feature_name=HuIgG_0.03                           | feature_id[44].value > threshold=769.8333435058594  |
| node_35: feature_name=SARS.CoV.S1.HisTag                   | feature_id[14].value > threshold=400.3000030517578  |
| node_39: feature_name=hCoV.HKU1.S1_S2                      | feature_id[22].value <= threshold=42662.666015625   |
| node_40: feature_name=Flu.B_Phu/.HA1                       | feature_id[11].value <= threshold=49118.416015625   |
| node_41: feature_name=hCoV.OC43.HE                         | feature_id[10].value <= threshold=25184.06640625    |
| node_42: feature_name=HuIgM_0.30                           | feature_id[13].value > threshold=1223.5             |
| node_56: feature_name=Flu.B_Mal/.HA1                       | feature_id[4].value > threshold=14985.33349609375   |
| Class: healthcare workers within 60 days after vaccination |                                                     |
|                                                            |                                                     |
| Rules_178                                                  | passed counts:1                                     |
| node_0: feature_name=HuIgG_0.03                            | feature_id[44].value <= threshold=3298.333251953125 |
| node_1: feature_name=SARS.CoV.2.S1.mFcTag                  | feature_id[0].value > threshold=5354.388916015625   |
| node_9: feature_name=HuIgM_0.03                            | feature_id[45].value > threshold=-80.66666793823242 |
| node_27: feature_name=HuIgM_0.03                           | feature_id[45].value <= threshold=61.33333206176758 |
| node_28: feature_name=a-HuIgG_0.30                         | feature_id[30].value <= threshold=34878.66796875    |
| node_29: feature_name=HuIgG_0.03                           | feature_id[44].value > threshold=769.8333435058594  |
| node_35: feature_name=SARS.CoV.S1.HisTag                   | feature_id[14].value > threshold=400.3000030517578  |
| node_39: feature_name=hCoV.HKU1.S1_S2                      | feature_id[22].value <= threshold=42662.666015625   |
| node_40: feature_name=Flu.B_Phu/.HA1                       | feature_id[11].value <= threshold=49118.416015625   |
| node_41: feature_name=hCoV.OC43.HE                         | feature_id[10].value <= threshold=25184.06640625    |
| node_42: feature_name=HuIgM_0.30                           | feature_id[13].value > threshold=1223.5             |
| node_56: feature_name=Flu.B_Mal/.HA1                       | feature_id[4].value <= threshold=14985.33349609375  |
| Class: healthcare workers 60–180 days after vaccination    |                                                     |
|                                                            |                                                     |

|                                                            |                                                     |
|------------------------------------------------------------|-----------------------------------------------------|
| Rules_179                                                  | passed counts:1                                     |
| node_0: feature_name=HuIgG_0.03                            | feature_id[44].value <= threshold=3298.333251953125 |
| node_1: feature_name=SARS.CoV.2.S1.mFcTag                  | feature_id[0].value > threshold=5354.388916015625   |
| node_9: feature_name=HuIgM_0.03                            | feature_id[45].value > threshold=-80.66666793823242 |
| node_27: feature_name=HuIgM_0.03                           | feature_id[45].value <= threshold=61.33333206176758 |
| node_28: feature_name=a-HuIgG_0.30                         | feature_id[30].value <= threshold=34878.66796875    |
| node_29: feature_name=HuIgG_0.03                           | feature_id[44].value > threshold=769.8333435058594  |
| node_35: feature_name=SARS.CoV.S1.HisTag                   | feature_id[14].value > threshold=400.3000030517578  |
| node_39: feature_name=hCoV.HKU1.S1_S2                      | feature_id[22].value <= threshold=42662.666015625   |
| node_40: feature_name=Flu.B_Phu/.HA1                       | feature_id[11].value <= threshold=49118.416015625   |
| node_41: feature_name=hCoV.OC43.HE                         | feature_id[10].value <= threshold=25184.06640625    |
| node_42: feature_name=HuIgM_0.30                           | feature_id[13].value <= threshold=1223.5            |
| node_43: feature_name=a-HuIgA_0.03                         | feature_id[29].value > threshold=-59.66666603088379 |
| node_47: feature_name=SARS.CoV.S1.HisTag                   | feature_id[14].value > threshold=25028.0            |
| node_53: feature_name=a-HuIgA_0.30                         | feature_id[27].value <= threshold=976.3333435058594 |
| Class: healthcare workers within 60 days after vaccination |                                                     |
|                                                            |                                                     |
| Rules_180                                                  | passed counts:1                                     |
| node_0: feature_name=HuIgG_0.03                            | feature_id[44].value <= threshold=3298.333251953125 |
| node_1: feature_name=SARS.CoV.2.S1.mFcTag                  | feature_id[0].value > threshold=5354.388916015625   |
| node_9: feature_name=HuIgM_0.03                            | feature_id[45].value > threshold=-80.66666793823242 |
| node_27: feature_name=HuIgM_0.03                           | feature_id[45].value <= threshold=61.33333206176758 |
| node_28: feature_name=a-HuIgG_0.30                         | feature_id[30].value <= threshold=34878.66796875    |
| node_29: feature_name=HuIgG_0.03                           | feature_id[44].value > threshold=769.8333435058594  |
| node_35: feature_name=SARS.CoV.S1.HisTag                   | feature_id[14].value > threshold=400.3000030517578  |

|                                                            |                                                      |
|------------------------------------------------------------|------------------------------------------------------|
| node_39: feature_name=hCoV.HKU1.S1_S2                      | feature_id[22].value <= threshold=42662.666015625    |
| node_40: feature_name=Flu.B_Phu/.HA1                       | feature_id[11].value <= threshold=49118.416015625    |
| node_41: feature_name=hCoV.OC43.HE                         | feature_id[10].value <= threshold=25184.06640625     |
| node_42: feature_name=HuIgM_0.30                           | feature_id[13].value <= threshold=1223.5             |
| node_43: feature_name=a-HuIgA_0.03                         | feature_id[29].value > threshold=-59.66666603088379  |
| node_47: feature_name=SARS.CoV.S1.HisTag                   | feature_id[14].value <= threshold=25028.0            |
| node_48: feature_name=HuIgM_0.03                           | feature_id[45].value > threshold=35.33333206176758   |
| node_50: feature_name=Flu.H1N1.HA1                         | feature_id[26].value > threshold=36011.291015625     |
| Class: healthcare workers over 180 days after vaccination  |                                                      |
|                                                            |                                                      |
| Rules_181                                                  | passed counts:1                                      |
| node_0: feature_name=HuIgG_0.03                            | feature_id[44].value <= threshold=3298.333251953125  |
| node_1: feature_name=SARS.CoV.2.S1.mFcTag                  | feature_id[0].value > threshold=5354.388916015625    |
| node_9: feature_name=HuIgM_0.03                            | feature_id[45].value > threshold=-80.66666793823242  |
| node_27: feature_name=HuIgM_0.03                           | feature_id[45].value <= threshold=61.33333206176758  |
| node_28: feature_name=a-HuIgG_0.30                         | feature_id[30].value <= threshold=34878.66796875     |
| node_29: feature_name=HuIgG_0.03                           | feature_id[44].value > threshold=769.8333435058594   |
| node_35: feature_name=SARS.CoV.S1.HisTag                   | feature_id[14].value > threshold=400.3000030517578   |
| node_39: feature_name=hCoV.HKU1.S1_S2                      | feature_id[22].value <= threshold=42662.666015625    |
| node_40: feature_name=Flu.B_Phu/.HA1                       | feature_id[11].value <= threshold=49118.416015625    |
| node_41: feature_name=hCoV.OC43.HE                         | feature_id[10].value <= threshold=25184.06640625     |
| node_42: feature_name=HuIgM_0.30                           | feature_id[13].value <= threshold=1223.5             |
| node_43: feature_name=a-HuIgA_0.03                         | feature_id[29].value <= threshold=-59.66666603088379 |
| node_44: feature_name=Flu.B_Phu/.HA1                       | feature_id[11].value > threshold=28467.833984375     |
| Class: healthcare workers within 60 days after vaccination |                                                      |

|                                                           |                                                      |
|-----------------------------------------------------------|------------------------------------------------------|
|                                                           |                                                      |
| Rules_182                                                 | passed counts:1                                      |
| node_0: feature_name=HuIgG_0.03                           | feature_id[44].value <= threshold=3298.333251953125  |
| node_1: feature_name=SARS.CoV.2.S1.mFcTag                 | feature_id[0].value > threshold=5354.388916015625    |
| node_9: feature_name=HuIgM_0.03                           | feature_id[45].value > threshold=-80.66666793823242  |
| node_27: feature_name=HuIgM_0.03                          | feature_id[45].value <= threshold=61.33333206176758  |
| node_28: feature_name=a-HuIgG_0.30                        | feature_id[30].value <= threshold=34878.66796875     |
| node_29: feature_name=HuIgG_0.03                          | feature_id[44].value > threshold=769.8333435058594   |
| node_35: feature_name=SARS.CoV.S1.HisTag                  | feature_id[14].value <= threshold=400.3000030517578  |
| node_36: feature_name=HuIgA_0.10                          | feature_id[42].value > threshold=4194.666564941406   |
| Class: healthcare workers 60–180 days after vaccination   |                                                      |
|                                                           |                                                      |
| Rules_183                                                 | passed counts:1                                      |
| node_0: feature_name=HuIgG_0.03                           | feature_id[44].value <= threshold=3298.333251953125  |
| node_1: feature_name=SARS.CoV.2.S1.mFcTag                 | feature_id[0].value > threshold=5354.388916015625    |
| node_9: feature_name=HuIgM_0.03                           | feature_id[45].value > threshold=-80.66666793823242  |
| node_27: feature_name=HuIgM_0.03                          | feature_id[45].value <= threshold=61.33333206176758  |
| node_28: feature_name=a-HuIgG_0.30                        | feature_id[30].value <= threshold=34878.66796875     |
| node_29: feature_name=HuIgG_0.03                          | feature_id[44].value <= threshold=769.8333435058594  |
| node_30: feature_name=SARS.CoV.2.Spike.RBD.His.Bac        | feature_id[9].value > threshold=12895.0166015625     |
| node_32: feature_name=a-HuIgM_0.03                        | feature_id[34].value <= threshold=-72.50000190734863 |
| Class: healthcare workers over 180 days after vaccination |                                                      |
|                                                           |                                                      |
| Rules_184                                                 | passed counts:1                                      |
| node_0: feature_name=HuIgG_0.03                           | feature_id[44].value <= threshold=3298.333251953125  |

|                                                           |                                                      |
|-----------------------------------------------------------|------------------------------------------------------|
| node_1: feature_name=SARS.CoV.2.S1.mFcTag                 | feature_id[0].value > threshold=5354.388916015625    |
| node_9: feature_name=HuIgM_0.03                           | feature_id[45].value <= threshold=-80.66666793823242 |
| node_10: feature_name=SARS.CoV.2.Spike.RBD.His.Bac        | feature_id[9].value > threshold=29393.55859375       |
| node_18: feature_name=Flu.B_Mal/.HA1                      | feature_id[4].value > threshold=38994.25             |
| node_20: feature_name=SARS.CoV.S1.HisTag                  | feature_id[14].value > threshold=11923.35009765625   |
| node_24: feature_name=SARS.CoV.2.S1.RBD.mFc               | feature_id[17].value <= threshold=44304.56640625     |
| Class: healthcare workers 60–180 days after vaccination   |                                                      |
|                                                           |                                                      |
| Rules_185                                                 | passed counts:1                                      |
| node_0: feature_name=HuIgG_0.03                           | feature_id[44].value <= threshold=3298.333251953125  |
| node_1: feature_name=SARS.CoV.2.S1.mFcTag                 | feature_id[0].value > threshold=5354.388916015625    |
| node_9: feature_name=HuIgM_0.03                           | feature_id[45].value <= threshold=-80.66666793823242 |
| node_10: feature_name=SARS.CoV.2.Spike.RBD.His.Bac        | feature_id[9].value > threshold=29393.55859375       |
| node_18: feature_name=Flu.B_Mal/.HA1                      | feature_id[4].value > threshold=38994.25             |
| node_20: feature_name=SARS.CoV.S1.HisTag                  | feature_id[14].value <= threshold=11923.35009765625  |
| node_21: feature_name=SARS.CoV.2.Spike.RBD.rFc            | feature_id[7].value <= threshold=44823.91796875      |
| Class: healthcare workers over 180 days after vaccination |                                                      |
|                                                           |                                                      |
| Rules_186                                                 | passed counts:1                                      |
| node_0: feature_name=HuIgG_0.03                           | feature_id[44].value <= threshold=3298.333251953125  |
| node_1: feature_name=SARS.CoV.2.S1.mFcTag                 | feature_id[0].value > threshold=5354.388916015625    |
| node_9: feature_name=HuIgM_0.03                           | feature_id[45].value <= threshold=-80.66666793823242 |
| node_10: feature_name=SARS.CoV.2.Spike.RBD.His.Bac        | feature_id[9].value <= threshold=29393.55859375      |
| node_11: feature_name=DcCoV.HKU23.NP                      | feature_id[21].value > threshold=-639.3333129882812  |
| node_13: feature_name=MERS.CoV.S1.ECD.1-1297.HisTag       | feature_id[12].value <= threshold=1026.1666564941406 |

|                                                            |                                                       |
|------------------------------------------------------------|-------------------------------------------------------|
| node_14: feature_name=SARS.CoV.2.S1+S2                     | feature_id[18].value > threshold=14681.66650390625    |
| Class: healthcare workers 60–180 days after vaccination    |                                                       |
|                                                            |                                                       |
| Rules_187                                                  | passed counts:1                                       |
| node_0: feature_name=HuIgG_0.03                            | feature_id[44].value <= threshold=3298.333251953125   |
| node_1: feature_name=SARS.CoV.2.S1.mFcTag                  | feature_id[0].value > threshold=5354.388916015625     |
| node_9: feature_name=HuIgM_0.03                            | feature_id[45].value <= threshold=-80.66666793823242  |
| node_10: feature_name=SARS.CoV.2.Spike.RBD.His.Bac         | feature_id[9].value <= threshold=29393.55859375       |
| node_11: feature_name=DcCoV.HKU23.NP                       | feature_id[21].value <= threshold=-639.3333129882812  |
| Class: healthcare workers 60–180 days after vaccination    |                                                       |
|                                                            |                                                       |
| Rules_188                                                  | passed counts:1                                       |
| node_0: feature_name=HuIgG_0.03                            | feature_id[44].value <= threshold=3298.333251953125   |
| node_1: feature_name=SARS.CoV.2.S1.mFcTag                  | feature_id[0].value <= threshold=5354.388916015625    |
| node_2: feature_name=SARS.CoV.2.S1.HisTag                  | feature_id[16].value > threshold=-383.86944580078125  |
| node_4: feature_name=hCoV.OC43.HE                          | feature_id[10].value <= threshold=414.5370330810547   |
| node_5: feature_name=SARS.CoV.2.S1.HisTag                  | feature_id[16].value <= threshold=1.5555554628372192  |
| Class: healthcare workers within 60 days after vaccination |                                                       |
|                                                            |                                                       |
| Rules_189                                                  | passed counts:1                                       |
| node_0: feature_name=HuIgG_0.03                            | feature_id[44].value <= threshold=3298.333251953125   |
| node_1: feature_name=SARS.CoV.2.S1.mFcTag                  | feature_id[0].value <= threshold=5354.388916015625    |
| node_2: feature_name=SARS.CoV.2.S1.HisTag                  | feature_id[16].value <= threshold=-383.86944580078125 |
| Class: healthcare workers 60–180 days after vaccination    |                                                       |



(2) Rules on the LightGBM feature list

|                                                         |                                                     |
|---------------------------------------------------------|-----------------------------------------------------|
| Rules_0                                                 | passed counts:249                                   |
| node_0: feature_name=HuIgG_0.10                         | feature_id[2].value <= threshold=19120.166015625    |
| node_1: feature_name=SARS.CoV.2.S1.RBD.mFc              | feature_id[28].value > threshold=3773.8334350585938 |
| node_9: feature_name=HuIgM_0.03                         | feature_id[14].value > threshold=-88.33333206176758 |
| node_27: feature_name=hCoV.HKU1.S1_S2                   | feature_id[32].value <= threshold=42767.0           |
| node_28: feature_name=HuIgG_0.03                        | feature_id[0].value > threshold=1005.0              |
| node_38: feature_name=a-HuIgG_0.30                      | feature_id[4].value <= threshold=33596.333984375    |
| node_39: feature_name=SARS.CoV.S1.HisTag                | feature_id[18].value > threshold=400.3000030517578  |
| node_43: feature_name=HuIgM_0.10                        | feature_id[6].value <= threshold=109.66666793823242 |
| node_44: feature_name=MERS.CoV.NP                       | feature_id[15].value > threshold=-50.125            |
| node_46: feature_name=hCoV.229E.S1_S2                   | feature_id[35].value <= threshold=42044.208984375   |
| node_47: feature_name=HuIgM_0.30                        | feature_id[8].value <= threshold=1223.5             |
| node_48: feature_name=SARS.CoV.S1.RBD.rFcTag            | feature_id[16].value <= threshold=27979.533203125   |
| Class: healthcare workers 60–180 days after vaccination |                                                     |
|                                                         |                                                     |
| Rules_1                                                 | passed counts:94                                    |
| node_0: feature_name=HuIgG_0.10                         | feature_id[2].value > threshold=19120.166015625     |
| node_96: feature_name=a-HuIgG_0.03                      | feature_id[7].value <= threshold=19665.666015625    |
| node_97: feature_name=MERS.CoV.S1.RBD.367.606.rFcTag    | feature_id[5].value <= threshold=3252.625           |
| node_98: feature_name=SARS.CoV.2.S2                     | feature_id[29].value > threshold=9506.32470703125   |
| node_116: feature_name=Flu.H1N1.HA1+HA2                 | feature_id[10].value <= threshold=54065.41796875    |
| node_117: feature_name=SARS.CoV.S1.RBD.rFcTag           | feature_id[16].value > threshold=24639.0            |
| node_167: feature_name=hCoV.OC43.HE                     | feature_id[33].value <= threshold=32466.5830078125  |
| node_168: feature_name=HuIgM_0.10                       | feature_id[6].value <= threshold=22.833333015441895 |

|                                                            |                                                      |
|------------------------------------------------------------|------------------------------------------------------|
| node_169: feature_name=SARS.CoV.2.S1.mFcTag                | feature_id[21].value <= threshold=54847.25           |
| node_170: feature_name=a-MoIgG_0.03                        | feature_id[12].value <= threshold=2342.8333740234375 |
| Class: healthcare workers within 60 days after vaccination |                                                      |
|                                                            |                                                      |
| Rules_2                                                    | passed counts:76                                     |
| node_0: feature_name=HuIgG_0.10                            | feature_id[2].value <= threshold=19120.166015625     |
| node_1: feature_name=SARS.CoV.2.S1.RBD.mFc                 | feature_id[28].value <= threshold=3773.8334350585938 |
| node_2: feature_name=SARS.CoV.2.S1.RBD.mFc                 | feature_id[28].value > threshold=-414.2999954223633  |
| node_4: feature_name=hCoV.OC43.HE                          | feature_id[33].value > threshold=414.5370330810547   |
| Class: unvaccinated healthcare workers                     |                                                      |
|                                                            |                                                      |
| Rules_3                                                    | passed counts:48                                     |
| node_0: feature_name=HuIgG_0.10                            | feature_id[2].value > threshold=19120.166015625      |
| node_96: feature_name=a-HuIgG_0.03                         | feature_id[7].value <= threshold=19665.666015625     |
| node_97: feature_name=MERS.CoV.S1.RBD.367.606.rFcTag       | feature_id[5].value > threshold=3252.625             |
| node_201: feature_name=SARS.CoV.2.S2                       | feature_id[29].value > threshold=37167.458984375     |
| node_301: feature_name=SARS.CoV.2.S1.mFcTag                | feature_id[21].value <= threshold=53322.333984375    |
| node_302: feature_name=MoIgG_0.03                          | feature_id[20].value > threshold=18.166666507720947  |
| node_318: feature_name=Flu.B_Mal/.HA1+HA2                  | feature_id[22].value <= threshold=54334.25           |
| Class: healthcare workers within 60 days after vaccination |                                                      |
|                                                            |                                                      |
| Rules_4                                                    | passed counts:44                                     |
| node_0: feature_name=HuIgG_0.10                            | feature_id[2].value > threshold=19120.166015625      |
| node_96: feature_name=a-HuIgG_0.03                         | feature_id[7].value <= threshold=19665.666015625     |
| node_97: feature_name=MERS.CoV.S1.RBD.367.606.rFcTag       | feature_id[5].value > threshold=3252.625             |

|                                                            |                                                     |
|------------------------------------------------------------|-----------------------------------------------------|
| node_201: feature_name=SARS.CoV.2.S2                       | feature_id[29].value <= threshold=37167.458984375   |
| node_202: feature_name=SARS.CoV.2.Spike.RBD.His.Bac        | feature_id[1].value > threshold=16030.75048828125   |
| node_212: feature_name=a-MoIgA_0.30                        | feature_id[37].value > threshold=1303.0             |
| node_224: feature_name=HuIgA_0.03                          | feature_id[26].value > threshold=25.83333396911621  |
| node_276: feature_name=hCoV.OC43.NP                        | feature_id[23].value <= threshold=3591.10009765625  |
| node_277: feature_name=hCoV.229E.S1                        | feature_id[30].value > threshold=28616.0            |
| node_287: feature_name=Flu.H3N2.HA1+HA2                    | feature_id[38].value <= threshold=55544.548828125   |
| Class: healthcare workers 60–180 days after vaccination    |                                                     |
|                                                            |                                                     |
| Rules_5                                                    | passed counts:38                                    |
| node_0: feature_name=HuIgG_0.10                            | feature_id[2].value > threshold=19120.166015625     |
| node_96: feature_name=a-HuIgG_0.03                         | feature_id[7].value <= threshold=19665.666015625    |
| node_97: feature_name=MERS.CoV.S1.RBD.367.606.rFcTag       | feature_id[5].value <= threshold=3252.625           |
| node_98: feature_name=SARS.CoV.2.S2                        | feature_id[29].value > threshold=9506.32470703125   |
| node_116: feature_name=Flu.H1N1.HA1+HA2                    | feature_id[10].value <= threshold=54065.41796875    |
| node_117: feature_name=SARS.CoV.S1.RBD.rFcTag              | feature_id[16].value <= threshold=24639.0           |
| node_118: feature_name=SARS.CoV.2.Spike.RBD.His.Bac        | feature_id[1].value <= threshold=23841.4169921875   |
| node_119: feature_name=SARS.CoV.2.S2                       | feature_id[29].value <= threshold=49775.806640625   |
| node_120: feature_name=MERS.CoV.NP                         | feature_id[15].value <= threshold=8014.466796875    |
| node_121: feature_name=Flu.H1N1.HA1+HA2                    | feature_id[10].value <= threshold=53033.25          |
| Class: healthcare workers within 60 days after vaccination |                                                     |
|                                                            |                                                     |
| Rules_6                                                    | passed counts:37                                    |
| node_0: feature_name=HuIgG_0.10                            | feature_id[2].value <= threshold=19120.166015625    |
| node_1: feature_name=SARS.CoV.2.S1.RBD.mFc                 | feature_id[28].value > threshold=3773.8334350585938 |

|                                                           |                                                      |
|-----------------------------------------------------------|------------------------------------------------------|
| node_9: feature_name=HuIgM_0.03                           | feature_id[14].value <= threshold=-88.33333206176758 |
| node_10: feature_name=HuIgA_0.03                          | feature_id[26].value <= threshold=304.5              |
| node_11: feature_name=Flu.H1N1.HA1+HA2                    | feature_id[10].value <= threshold=53444.666015625    |
| node_12: feature_name=MERS.CoV.S1.RBD.367.606.rFcTag      | feature_id[5].value > threshold=-2425.0              |
| node_14: feature_name=Flu.B_Mal/.HA1+HA2                  | feature_id[22].value <= threshold=53898.0            |
| Class: healthcare workers over 180 days after vaccination |                                                      |
|                                                           |                                                      |
| Rules_7                                                   | passed counts:27                                     |
| node_0: feature_name=HuIgG_0.10                           | feature_id[2].value > threshold=19120.166015625      |
| node_96: feature_name=a-HuIgG_0.03                        | feature_id[7].value > threshold=19665.666015625      |
| node_350: feature_name=HuIgM_0.03                         | feature_id[14].value > threshold=-189.0              |
| node_354: feature_name=HuIgM_0.30                         | feature_id[8].value > threshold=441.8333282470703    |
| node_356: feature_name=a-HuIgG_0.10                       | feature_id[3].value > threshold=32914.5              |
| node_360: feature_name=a-MoIgG_0.03                       | feature_id[12].value <= threshold=2414.8333740234375 |
| node_361: feature_name=HuIgG_0.10                         | feature_id[2].value <= threshold=28475.6669921875    |
| Class: healthcare workers over 180 days after vaccination |                                                      |
|                                                           |                                                      |
| Rules_8                                                   | passed counts:26                                     |
| node_0: feature_name=HuIgG_0.10                           | feature_id[2].value > threshold=19120.166015625      |
| node_96: feature_name=a-HuIgG_0.03                        | feature_id[7].value <= threshold=19665.666015625     |
| node_97: feature_name=MERS.CoV.S1.RBD.367.606.rFcTag      | feature_id[5].value > threshold=3252.625             |
| node_201: feature_name=SARS.CoV.2.S2                      | feature_id[29].value <= threshold=37167.458984375    |
| node_202: feature_name=SARS.CoV.2.Spike.RBD.His.Bac       | feature_id[1].value > threshold=16030.75048828125    |
| node_212: feature_name=a-MoIgA_0.30                       | feature_id[37].value > threshold=1303.0              |
| node_224: feature_name=HuIgA_0.03                         | feature_id[26].value <= threshold=25.83333396911621  |

|                                                         |                                                      |
|---------------------------------------------------------|------------------------------------------------------|
| node_225: feature_name=Flu.B_Phu/.HA1+HA2               | feature_id[19].value <= threshold=54802.5            |
| node_226: feature_name=hCoV.HKU1.NP                     | feature_id[11].value <= threshold=13460.3330078125   |
| node_227: feature_name=MoIgG_0.30                       | feature_id[34].value > threshold=3760.5              |
| node_229: feature_name=HuIgM_0.10                       | feature_id[6].value > threshold=-87.16666412353516   |
| node_233: feature_name=a-HuIgG_0.10                     | feature_id[3].value > threshold=27244.3330078125     |
| node_235: feature_name=SARS.CoV.S1.RBD.rFcTag           | feature_id[16].value > threshold=20123.43359375      |
| node_245: feature_name=hCoV.OC43.NP                     | feature_id[23].value > threshold=1775.816650390625   |
| node_253: feature_name=SARS.CoV.S1.RBD.rFcTag           | feature_id[16].value > threshold=21641.4169921875    |
| node_255: feature_name=HuIgA_0.03                       | feature_id[26].value <= threshold=15.333333015441895 |
| node_256: feature_name=Flu.H3N2.HA1                     | feature_id[25].value <= threshold=52674.0            |
| node_257: feature_name=hCoV.HKU1.S1_S2                  | feature_id[32].value > threshold=37449.416015625     |
| node_261: feature_name=SARS.CoV.2.S1+S2                 | feature_id[17].value > threshold=42043.224609375     |
| node_263: feature_name=Flu.B_Mal/.HA1                   | feature_id[9].value <= threshold=50467.166015625     |
| node_264: feature_name=hCoV.OC43.HE                     | feature_id[33].value <= threshold=29465.6669921875   |
| Class: healthcare workers 60–180 days after vaccination |                                                      |
|                                                         |                                                      |
| Rules_9                                                 | passed counts:24                                     |
| node_0: feature_name=HuIgG_0.10                         | feature_id[2].value > threshold=19120.166015625      |
| node_96: feature_name=a-HuIgG_0.03                      | feature_id[7].value <= threshold=19665.666015625     |
| node_97: feature_name=MERS.CoV.S1.RBD.367.606.rFcTag    | feature_id[5].value <= threshold=3252.625            |
| node_98: feature_name=SARS.CoV.2.S2                     | feature_id[29].value > threshold=9506.32470703125    |
| node_116: feature_name=Flu.H1N1.HA1+HA2                 | feature_id[10].value <= threshold=54065.41796875     |
| node_117: feature_name=SARS.CoV.S1.RBD.rFcTag           | feature_id[16].value <= threshold=24639.0            |
| node_118: feature_name=SARS.CoV.2.Spike.RBD.His.Bac     | feature_id[1].value > threshold=23841.4169921875     |
| node_128: feature_name=SARS.CoV.2.S1+S2                 | feature_id[17].value > threshold=41778.25            |

|                                                            |                                                      |
|------------------------------------------------------------|------------------------------------------------------|
| node_138: feature_name=hCoV.NL63.S1_S2                     | feature_id[13].value <= threshold=35816.083984375    |
| node_139: feature_name=Flu.B_Mal/.HA1                      | feature_id[9].value <= threshold=46360.66796875      |
| node_140: feature_name=MERS.CoV.NP                         | feature_id[15].value > threshold=809.8333129882812   |
| Class: healthcare workers within 60 days after vaccination |                                                      |
|                                                            |                                                      |
| Rules_10                                                   | passed counts:23                                     |
| node_0: feature_name=HuIgG_0.10                            | feature_id[2].value > threshold=19120.166015625      |
| node_96: feature_name=a-HuIgG_0.03                         | feature_id[7].value <= threshold=19665.666015625     |
| node_97: feature_name=MERS.CoV.S1.RBD.367.606.rFcTag       | feature_id[5].value <= threshold=3252.625            |
| node_98: feature_name=SARS.CoV.2.S2                        | feature_id[29].value > threshold=9506.32470703125    |
| node_116: feature_name=Flu.H1N1.HA1+HA2                    | feature_id[10].value <= threshold=54065.41796875     |
| node_117: feature_name=SARS.CoV.S1.RBD.rFcTag              | feature_id[16].value > threshold=24639.0             |
| node_167: feature_name=hCoV.OC43.HE                        | feature_id[33].value <= threshold=32466.5830078125   |
| node_168: feature_name=HuIgM_0.10                          | feature_id[6].value > threshold=22.833333015441895   |
| node_178: feature_name=a-MoIgA_0.03                        | feature_id[24].value > threshold=-34.333333015441895 |
| node_184: feature_name=HuIgG_0.10                          | feature_id[2].value > threshold=21401.166015625      |
| node_188: feature_name=SARS.CoV.2.S1.mFcTag                | feature_id[21].value > threshold=51001.0             |
| Class: healthcare workers within 60 days after vaccination |                                                      |
|                                                            |                                                      |
| Rules_11                                                   | passed counts:22                                     |
| node_0: feature_name=HuIgG_0.10                            | feature_id[2].value > threshold=19120.166015625      |
| node_96: feature_name=a-HuIgG_0.03                         | feature_id[7].value <= threshold=19665.666015625     |
| node_97: feature_name=MERS.CoV.S1.RBD.367.606.rFcTag       | feature_id[5].value > threshold=3252.625             |
| node_201: feature_name=SARS.CoV.2.S2                       | feature_id[29].value > threshold=37167.458984375     |
| node_301: feature_name=SARS.CoV.2.S1.mFcTag                | feature_id[21].value <= threshold=53322.333984375    |

|                                                            |                                                      |
|------------------------------------------------------------|------------------------------------------------------|
| node_302: feature_name=MoIgG_0.03                          | feature_id[20].value <= threshold=18.166666507720947 |
| node_303: feature_name=MoIgG_0.30                          | feature_id[34].value <= threshold=7257.166748046875  |
| node_304: feature_name=hCoV.NL63.S1_S2                     | feature_id[13].value <= threshold=52607.083984375    |
| node_305: feature_name=HuIgG_0.30                          | feature_id[36].value > threshold=35912.0             |
| Class: healthcare workers within 60 days after vaccination |                                                      |
|                                                            |                                                      |
| Rules_12                                                   | passed counts:22                                     |
| node_0: feature_name=HuIgG_0.10                            | feature_id[2].value > threshold=19120.166015625      |
| node_96: feature_name=a-HuIgG_0.03                         | feature_id[7].value <= threshold=19665.666015625     |
| node_97: feature_name=MERS.CoV.S1.RBD.367.606.rFcTag       | feature_id[5].value > threshold=3252.625             |
| node_201: feature_name=SARS.CoV.2.S2                       | feature_id[29].value <= threshold=37167.458984375    |
| node_202: feature_name=SARS.CoV.2.Spike.RBD.His.Bac        | feature_id[1].value > threshold=16030.75048828125    |
| node_212: feature_name=a-MoIgA_0.30                        | feature_id[37].value <= threshold=1303.0             |
| node_213: feature_name=MERS.CoV.NP                         | feature_id[15].value > threshold=898.7833251953125   |
| node_217: feature_name=hCoV.NL63.S1_S2                     | feature_id[13].value > threshold=30153.3330078125    |
| node_219: feature_name=SARS.CoV.S1.HisTag                  | feature_id[18].value > threshold=4305.2916259765625  |
| Class: healthcare workers within 60 days after vaccination |                                                      |
|                                                            |                                                      |
| Rules_13                                                   | passed counts:20                                     |
| node_0: feature_name=HuIgG_0.10                            | feature_id[2].value > threshold=19120.166015625      |
| node_96: feature_name=a-HuIgG_0.03                         | feature_id[7].value <= threshold=19665.666015625     |
| node_97: feature_name=MERS.CoV.S1.RBD.367.606.rFcTag       | feature_id[5].value > threshold=3252.625             |
| node_201: feature_name=SARS.CoV.2.S2                       | feature_id[29].value > threshold=37167.458984375     |
| node_301: feature_name=SARS.CoV.2.S1.mFcTag                | feature_id[21].value > threshold=53322.333984375     |
| node_321: feature_name=a-MoIgA_0.03                        | feature_id[24].value <= threshold=212.0              |

|                                                         |                                                     |
|---------------------------------------------------------|-----------------------------------------------------|
| node_322: feature_name=Flu.H3N2.HA1                     | feature_id[25].value > threshold=37503.517578125    |
| node_330: feature_name=a-MoIgG_0.03                     | feature_id[12].value <= threshold=556.6666564941406 |
| node_331: feature_name=hCoV.229E.S1_S2                  | feature_id[35].value <= threshold=47263.833984375   |
| node_332: feature_name=a-HuIgG_0.10                     | feature_id[3].value > threshold=30393.166015625     |
| node_336: feature_name=hCoV.NL63.S1_S2                  | feature_id[13].value <= threshold=53473.16796875    |
| node_337: feature_name=hCoV.HKU1.NP                     | feature_id[11].value <= threshold=16009.80029296875 |
| node_338: feature_name=hCoV.HKU1.S1_S2                  | feature_id[32].value > threshold=41343.134765625    |
| Class: healthcare workers 60–180 days after vaccination |                                                     |
|                                                         |                                                     |
| Rules_14                                                | passed counts:17                                    |
| node_0: feature_name=HuIgG_0.10                         | feature_id[2].value <= threshold=19120.166015625    |
| node_1: feature_name=SARS.CoV.2.S1.RBD.mFc              | feature_id[28].value > threshold=3773.8334350585938 |
| node_9: feature_name=HuIgM_0.03                         | feature_id[14].value > threshold=-88.33333206176758 |
| node_27: feature_name=hCoV.HKU1.S1_S2                   | feature_id[32].value <= threshold=42767.0           |
| node_28: feature_name=HuIgG_0.03                        | feature_id[0].value > threshold=1005.0              |
| node_38: feature_name=a-HuIgG_0.30                      | feature_id[4].value > threshold=33596.333984375     |
| node_60: feature_name=a-HuIgG_0.03                      | feature_id[7].value > threshold=10366.5             |
| node_70: feature_name=hCoV.OC43.HE                      | feature_id[33].value <= threshold=23182.7001953125  |
| node_71: feature_name=SARS.CoV.2.Spike.RBD.His.Bac      | feature_id[1].value <= threshold=48979.25           |
| node_72: feature_name=HuIgM_0.10                        | feature_id[6].value <= threshold=40.166666984558105 |
| Class: healthcare workers 60–180 days after vaccination |                                                     |
|                                                         |                                                     |
| Rules_15                                                | passed counts:16                                    |
| node_0: feature_name=HuIgG_0.10                         | feature_id[2].value > threshold=19120.166015625     |
| node_96: feature_name=a-HuIgG_0.03                      | feature_id[7].value <= threshold=19665.666015625    |



|                                                            |                                                     |
|------------------------------------------------------------|-----------------------------------------------------|
| node_97: feature_name=MERS.CoV.S1.RBD.367.606.rFcTag       | feature_id[5].value <= threshold=3252.625           |
| node_98: feature_name=SARS.CoV.2.S2                        | feature_id[29].value > threshold=9506.32470703125   |
| node_116: feature_name=Flu.H1N1.HA1+HA2                    | feature_id[10].value <= threshold=54065.41796875    |
| node_117: feature_name=SARS.CoV.S1.RBD.rFcTag              | feature_id[16].value <= threshold=24639.0           |
| node_118: feature_name=SARS.CoV.2.Spike.RBD.His.Bac        | feature_id[1].value > threshold=23841.4169921875    |
| node_128: feature_name=SARS.CoV.2.S1+S2                    | feature_id[17].value > threshold=41778.25           |
| node_138: feature_name=hCoV.NL63.S1_S2                     | feature_id[13].value > threshold=35816.083984375    |
| node_146: feature_name=a-MoIgG_0.10                        | feature_id[27].value > threshold=3760.5             |
| node_156: feature_name=a-HuIgG_0.03                        | feature_id[7].value > threshold=9740.8330078125     |
| node_158: feature_name=a-HuIgG_0.30                        | feature_id[4].value <= threshold=42960.0            |
| Class: healthcare workers within 60 days after vaccination |                                                     |
|                                                            |                                                     |
| Rules_16                                                   | passed counts:16                                    |
| node_0: feature_name=HuIgG_0.10                            | feature_id[2].value <= threshold=19120.166015625    |
| node_1: feature_name=SARS.CoV.2.S1.RBD.mFc                 | feature_id[28].value > threshold=3773.8334350585938 |
| node_9: feature_name=HuIgM_0.03                            | feature_id[14].value > threshold=-88.33333206176758 |
| node_27: feature_name=hCoV.HKU1.S1_S2                      | feature_id[32].value <= threshold=42767.0           |
| node_28: feature_name=HuIgG_0.03                           | feature_id[0].value <= threshold=1005.0             |
| node_29: feature_name=SARS.CoV.2.S1.mFcTag                 | feature_id[21].value <= threshold=34194.916015625   |
| node_30: feature_name=SARS.CoV.2.S2                        | feature_id[29].value <= threshold=7509.916748046875 |
| Class: healthcare workers over 180 days after vaccination  |                                                     |
|                                                            |                                                     |
| Rules_17                                                   | passed counts:15                                    |
| node_0: feature_name=HuIgG_0.10                            | feature_id[2].value > threshold=19120.166015625     |
| node_96: feature_name=a-HuIgG_0.03                         | feature_id[7].value <= threshold=19665.666015625    |

|                                                            |                                                    |
|------------------------------------------------------------|----------------------------------------------------|
| node_97: feature_name=MERS.CoV.S1.RBD.367.606.rFcTag       | feature_id[5].value > threshold=3252.625           |
| node_201: feature_name=SARS.CoV.2.S2                       | feature_id[29].value > threshold=37167.458984375   |
| node_301: feature_name=SARS.CoV.2.S1.mFcTag                | feature_id[21].value > threshold=53322.333984375   |
| node_321: feature_name=a-MoIgA_0.03                        | feature_id[24].value <= threshold=212.0            |
| node_322: feature_name=Flu.H3N2.HA1                        | feature_id[25].value > threshold=37503.517578125   |
| node_330: feature_name=a-MoIgG_0.03                        | feature_id[12].value > threshold=556.6666564941406 |
| node_344: feature_name=a-HuIgG_0.10                        | feature_id[3].value > threshold=30472.333984375    |
| Class: healthcare workers within 60 days after vaccination |                                                    |
|                                                            |                                                    |
| Rules_18                                                   | passed counts:15                                   |
| node_0: feature_name=HuIgG_0.10                            | feature_id[2].value > threshold=19120.166015625    |
| node_96: feature_name=a-HuIgG_0.03                         | feature_id[7].value <= threshold=19665.666015625   |
| node_97: feature_name=MERS.CoV.S1.RBD.367.606.rFcTag       | feature_id[5].value > threshold=3252.625           |
| node_201: feature_name=SARS.CoV.2.S2                       | feature_id[29].value > threshold=37167.458984375   |
| node_301: feature_name=SARS.CoV.2.S1.mFcTag                | feature_id[21].value > threshold=53322.333984375   |
| node_321: feature_name=a-MoIgA_0.03                        | feature_id[24].value <= threshold=212.0            |
| node_322: feature_name=Flu.H3N2.HA1                        | feature_id[25].value <= threshold=37503.517578125  |
| node_323: feature_name=hCoV.229E.S1_S2                     | feature_id[35].value > threshold=29288.533203125   |
| Class: healthcare workers within 60 days after vaccination |                                                    |
|                                                            |                                                    |
| Rules_19                                                   | passed counts:15                                   |
| node_0: feature_name=HuIgG_0.10                            | feature_id[2].value > threshold=19120.166015625    |
| node_96: feature_name=a-HuIgG_0.03                         | feature_id[7].value <= threshold=19665.666015625   |
| node_97: feature_name=MERS.CoV.S1.RBD.367.606.rFcTag       | feature_id[5].value > threshold=3252.625           |
| node_201: feature_name=SARS.CoV.2.S2                       | feature_id[29].value <= threshold=37167.458984375  |

|                                                            |                                                      |
|------------------------------------------------------------|------------------------------------------------------|
| node_202: feature_name=SARS.CoV.2.Spike.RBD.His.Bac        | feature_id[1].value > threshold=16030.75048828125    |
| node_212: feature_name=a-MoIgA_0.30                        | feature_id[37].value > threshold=1303.0              |
| node_224: feature_name=HuIgA_0.03                          | feature_id[26].value > threshold=25.83333396911621   |
| node_276: feature_name=hCoV.OC43.NP                        | feature_id[23].value > threshold=3591.10009765625    |
| node_290: feature_name=SARS.CoV.2.Spike.RBD.His.Bac        | feature_id[1].value <= threshold=33649.125           |
| node_291: feature_name=SARS.CoV.2.S1.mFcTag                | feature_id[21].value > threshold=49171.599609375     |
| node_293: feature_name=a-MoIgA_0.03                        | feature_id[24].value > threshold=-139.66666412353516 |
| Class: healthcare workers within 60 days after vaccination |                                                      |
|                                                            |                                                      |
| Rules_20                                                   | passed counts:15                                     |
| node_0: feature_name=HuIgG_0.10                            | feature_id[2].value > threshold=19120.166015625      |
| node_96: feature_name=a-HuIgG_0.03                         | feature_id[7].value <= threshold=19665.666015625     |
| node_97: feature_name=MERS.CoV.S1.RBD.367.606.rFcTag       | feature_id[5].value > threshold=3252.625             |
| node_201: feature_name=SARS.CoV.2.S2                       | feature_id[29].value <= threshold=37167.458984375    |
| node_202: feature_name=SARS.CoV.2.Spike.RBD.His.Bac        | feature_id[1].value > threshold=16030.75048828125    |
| node_212: feature_name=a-MoIgA_0.30                        | feature_id[37].value > threshold=1303.0              |
| node_224: feature_name=HuIgA_0.03                          | feature_id[26].value > threshold=25.83333396911621   |
| node_276: feature_name=hCoV.OC43.NP                        | feature_id[23].value <= threshold=3591.10009765625   |
| node_277: feature_name=hCoV.229E.S1                        | feature_id[30].value <= threshold=28616.0            |
| node_278: feature_name=a-MoIgA_0.03                        | feature_id[24].value > threshold=-30.66666603088379  |
| node_282: feature_name=HuIgA_0.03                          | feature_id[26].value <= threshold=965.3333435058594  |
| node_283: feature_name=HuIgG_0.03                          | feature_id[0].value <= threshold=7378.66650390625    |
| Class: healthcare workers 60–180 days after vaccination    |                                                      |
|                                                            |                                                      |
| Rules_21                                                   | passed counts:15                                     |

|                                                         |                                                     |
|---------------------------------------------------------|-----------------------------------------------------|
| node_0: feature_name=HuIgG_0.10                         | feature_id[2].value > threshold=19120.166015625     |
| node_96: feature_name=a-HuIgG_0.03                      | feature_id[7].value <= threshold=19665.666015625    |
| node_97: feature_name=MERS.CoV.S1.RBD.367.606.rFcTag    | feature_id[5].value > threshold=3252.625            |
| node_201: feature_name=SARS.CoV.2.S2                    | feature_id[29].value <= threshold=37167.458984375   |
| node_202: feature_name=SARS.CoV.2.Spike.RBD.His.Bac     | feature_id[1].value > threshold=16030.75048828125   |
| node_212: feature_name=a-MoIgA_0.30                     | feature_id[37].value > threshold=1303.0             |
| node_224: feature_name=HuIgA_0.03                       | feature_id[26].value <= threshold=25.83333396911621 |
| node_225: feature_name=Flu.B_Phu/.HA1+HA2               | feature_id[19].value <= threshold=54802.5           |
| node_226: feature_name=hCoV.HKU1.NP                     | feature_id[11].value <= threshold=13460.3330078125  |
| node_227: feature_name=MoIgG_0.30                       | feature_id[34].value > threshold=3760.5             |
| node_229: feature_name=HuIgM_0.10                       | feature_id[6].value > threshold=-87.16666412353516  |
| node_233: feature_name=a-HuIgG_0.10                     | feature_id[3].value > threshold=27244.3330078125    |
| node_235: feature_name=SARS.CoV.S1.RBD.rFcTag           | feature_id[16].value <= threshold=20123.43359375    |
| node_236: feature_name=MERS.CoV.S1.RBD.367.606.rFcTag   | feature_id[5].value > threshold=4326.625            |
| node_238: feature_name=SARS.CoV.NP                      | feature_id[31].value > threshold=2842.375           |
| node_240: feature_name=Flu.H1N1.HA1+HA2                 | feature_id[10].value <= threshold=53053.666015625   |
| node_241: feature_name=MoIgG_0.03                       | feature_id[20].value > threshold=-68.16666793823242 |
| Class: healthcare workers 60–180 days after vaccination |                                                     |
|                                                         |                                                     |
| Rules_22                                                | passed counts:15                                    |
| node_0: feature_name=HuIgG_0.10                         | feature_id[2].value > threshold=19120.166015625     |
| node_96: feature_name=a-HuIgG_0.03                      | feature_id[7].value <= threshold=19665.666015625    |
| node_97: feature_name=MERS.CoV.S1.RBD.367.606.rFcTag    | feature_id[5].value > threshold=3252.625            |
| node_201: feature_name=SARS.CoV.2.S2                    | feature_id[29].value <= threshold=37167.458984375   |
| node_202: feature_name=SARS.CoV.2.Spike.RBD.His.Bac     | feature_id[1].value <= threshold=16030.75048828125  |

|                                                            |                                                       |
|------------------------------------------------------------|-------------------------------------------------------|
| node_203: feature_name=a-MoIgG_0.10                        | feature_id[27].value > threshold=2117.9999389648438   |
| node_207: feature_name=SARS.CoV.S1.HisTag                  | feature_id[18].value > threshold=1072.50830078125     |
| Class: healthcare workers within 60 days after vaccination |                                                       |
|                                                            |                                                       |
| Rules_23                                                   | passed counts:14                                      |
| node_0: feature_name=HuIgG_0.10                            | feature_id[2].value > threshold=19120.166015625       |
| node_96: feature_name=a-HuIgG_0.03                         | feature_id[7].value <= threshold=19665.666015625      |
| node_97: feature_name=MERS.CoV.S1.RBD.367.606.rFcTag       | feature_id[5].value > threshold=3252.625              |
| node_201: feature_name=SARS.CoV.2.S2                       | feature_id[29].value <= threshold=37167.458984375     |
| node_202: feature_name=SARS.CoV.2.Spike.RBD.His.Bac        | feature_id[1].value > threshold=16030.75048828125     |
| node_212: feature_name=a-MoIgA_0.30                        | feature_id[37].value > threshold=1303.0               |
| node_224: feature_name=HuIgA_0.03                          | feature_id[26].value <= threshold=25.83333396911621   |
| node_225: feature_name=Flu.B_Phu/.HA1+HA2                  | feature_id[19].value <= threshold=54802.5             |
| node_226: feature_name=hCoV.HKU1.NP                        | feature_id[11].value <= threshold=13460.3330078125    |
| node_227: feature_name=MoIgG_0.30                          | feature_id[34].value > threshold=3760.5               |
| node_229: feature_name=HuIgM_0.10                          | feature_id[6].value > threshold=-87.16666412353516    |
| node_233: feature_name=a-HuIgG_0.10                        | feature_id[3].value > threshold=27244.3330078125      |
| node_235: feature_name=SARS.CoV.S1.RBD.rFcTag              | feature_id[16].value > threshold=20123.43359375       |
| node_245: feature_name=hCoV.OC43.NP                        | feature_id[23].value <= threshold=1775.816650390625   |
| node_246: feature_name=HuIgA_0.03                          | feature_id[26].value <= threshold=-10.333333492279053 |
| node_247: feature_name=SARS.CoV.2.S1.RBD.mFc               | feature_id[28].value <= threshold=53114.833984375     |
| Class: healthcare workers within 60 days after vaccination |                                                       |
|                                                            |                                                       |
| Rules_24                                                   | passed counts:14                                      |
| node_0: feature_name=HuIgG_0.10                            | feature_id[2].value > threshold=19120.166015625       |

|                                                           |                                                     |
|-----------------------------------------------------------|-----------------------------------------------------|
| node_96: feature_name=a-HuIgG_0.03                        | feature_id[7].value <= threshold=19665.666015625    |
| node_97: feature_name=MERS.CoV.S1.RBD.367.606.rFcTag      | feature_id[5].value > threshold=3252.625            |
| node_201: feature_name=SARS.CoV.2.S2                      | feature_id[29].value <= threshold=37167.458984375   |
| node_202: feature_name=SARS.CoV.2.Spike.RBD.His.Bac       | feature_id[1].value > threshold=16030.75048828125   |
| node_212: feature_name=a-MoIgA_0.30                       | feature_id[37].value > threshold=1303.0             |
| node_224: feature_name=HuIgA_0.03                         | feature_id[26].value <= threshold=25.83333396911621 |
| node_225: feature_name=Flu.B_Phu/.HA1+HA2                 | feature_id[19].value <= threshold=54802.5           |
| node_226: feature_name=hCoV.HKU1.NP                       | feature_id[11].value <= threshold=13460.3330078125  |
| node_227: feature_name=MoIgG_0.30                         | feature_id[34].value > threshold=3760.5             |
| node_229: feature_name=HuIgM_0.10                         | feature_id[6].value > threshold=-87.16666412353516  |
| node_233: feature_name=a-HuIgG_0.10                       | feature_id[3].value > threshold=27244.3330078125    |
| node_235: feature_name=SARS.CoV.S1.RBD.rFcTag             | feature_id[16].value <= threshold=20123.43359375    |
| node_236: feature_name=MERS.CoV.S1.RBD.367.606.rFcTag     | feature_id[5].value <= threshold=4326.625           |
| Class: healthcare workers 60–180 days after vaccination   |                                                     |
|                                                           |                                                     |
| Rules_25                                                  | passed counts:13                                    |
| node_0: feature_name=HuIgG_0.10                           | feature_id[2].value <= threshold=19120.166015625    |
| node_1: feature_name=SARS.CoV.2.S1.RBD.mFc                | feature_id[28].value > threshold=3773.8334350585938 |
| node_9: feature_name=HuIgM_0.03                           | feature_id[14].value > threshold=-88.33333206176758 |
| node_27: feature_name=hCoV.HKU1.S1_S2                     | feature_id[32].value > threshold=42767.0            |
| node_77: feature_name=Flu.B_Mal/.HA1                      | feature_id[9].value > threshold=41191.69921875      |
| node_91: feature_name=hCoV.NL63.S1_S2                     | feature_id[13].value <= threshold=33974.650390625   |
| Class: healthcare workers over 180 days after vaccination |                                                     |
|                                                           |                                                     |
| Rules_26                                                  | passed counts:13                                    |

|                                                            |                                                      |
|------------------------------------------------------------|------------------------------------------------------|
| node_0: feature_name=HuIgG_0.10                            | feature_id[2].value <= threshold=19120.166015625     |
| node_1: feature_name=SARS.CoV.2.S1.RBD.mFc                 | feature_id[28].value > threshold=3773.8334350585938  |
| node_9: feature_name=HuIgM_0.03                            | feature_id[14].value > threshold=-88.33333206176758  |
| node_27: feature_name=hCoV.HKU1.S1_S2                      | feature_id[32].value > threshold=42767.0             |
| node_77: feature_name=Flu.B_Mal/.HA1                       | feature_id[9].value <= threshold=41191.69921875      |
| node_78: feature_name=SARS.CoV.2.S1.mFcTag                 | feature_id[21].value > threshold=41709.720703125     |
| node_82: feature_name=HuIgM_0.10                           | feature_id[6].value > threshold=-43.83333396911621   |
| node_86: feature_name=HuIgG_0.10                           | feature_id[2].value <= threshold=18966.0             |
| node_87: feature_name=SARS.CoV.2.S2                        | feature_id[29].value > threshold=22915.0             |
| Class: healthcare workers within 60 days after vaccination |                                                      |
|                                                            |                                                      |
| Rules_27                                                   | passed counts:11                                     |
| node_0: feature_name=HuIgG_0.10                            | feature_id[2].value > threshold=19120.166015625      |
| node_96: feature_name=a-HuIgG_0.03                         | feature_id[7].value <= threshold=19665.666015625     |
| node_97: feature_name=MERS.CoV.S1.RBD.367.606.rFcTag       | feature_id[5].value <= threshold=3252.625            |
| node_98: feature_name=SARS.CoV.2.S2                        | feature_id[29].value > threshold=9506.32470703125    |
| node_116: feature_name=Flu.H1N1.HA1+HA2                    | feature_id[10].value <= threshold=54065.41796875     |
| node_117: feature_name=SARS.CoV.S1.RBD.rFcTag              | feature_id[16].value <= threshold=24639.0            |
| node_118: feature_name=SARS.CoV.2.Spike.RBD.His.Bac        | feature_id[1].value > threshold=23841.4169921875     |
| node_128: feature_name=SARS.CoV.2.S1+S2                    | feature_id[17].value <= threshold=41778.25           |
| node_129: feature_name=SARS.CoV.S1.HisTag                  | feature_id[18].value <= threshold=3569.2833251953125 |
| node_130: feature_name=SARS.CoV.2.S2                       | feature_id[29].value <= threshold=26478.916015625    |
| Class: healthcare workers 60–180 days after vaccination    |                                                      |
|                                                            |                                                      |
| Rules_28                                                   | passed counts:10                                     |

|                                                         |                                                     |
|---------------------------------------------------------|-----------------------------------------------------|
| node_0: feature_name=HuIgG_0.10                         | feature_id[2].value > threshold=19120.166015625     |
| node_96: feature_name=a-HuIgG_0.03                      | feature_id[7].value <= threshold=19665.666015625    |
| node_97: feature_name=MERS.CoV.S1.RBD.367.606.rFcTag    | feature_id[5].value > threshold=3252.625            |
| node_201: feature_name=SARS.CoV.2.S2                    | feature_id[29].value <= threshold=37167.458984375   |
| node_202: feature_name=SARS.CoV.2.Spike.RBD.His.Bac     | feature_id[1].value > threshold=16030.75048828125   |
| node_212: feature_name=a-MoIgA_0.30                     | feature_id[37].value > threshold=1303.0             |
| node_224: feature_name=HuIgA_0.03                       | feature_id[26].value > threshold=25.83333396911621  |
| node_276: feature_name=hCoV.OC43.NP                     | feature_id[23].value > threshold=3591.10009765625   |
| node_290: feature_name=SARS.CoV.2.Spike.RBD.His.Bac     | feature_id[1].value > threshold=33649.125           |
| node_296: feature_name=HuIgM_0.03                       | feature_id[14].value > threshold=-90.5              |
| Class: healthcare workers 60–180 days after vaccination |                                                     |
|                                                         |                                                     |
| Rules_29                                                | passed counts:10                                    |
| node_0: feature_name=HuIgG_0.10                         | feature_id[2].value > threshold=19120.166015625     |
| node_96: feature_name=a-HuIgG_0.03                      | feature_id[7].value <= threshold=19665.666015625    |
| node_97: feature_name=MERS.CoV.S1.RBD.367.606.rFcTag    | feature_id[5].value > threshold=3252.625            |
| node_201: feature_name=SARS.CoV.2.S2                    | feature_id[29].value <= threshold=37167.458984375   |
| node_202: feature_name=SARS.CoV.2.Spike.RBD.His.Bac     | feature_id[1].value > threshold=16030.75048828125   |
| node_212: feature_name=a-MoIgA_0.30                     | feature_id[37].value > threshold=1303.0             |
| node_224: feature_name=HuIgA_0.03                       | feature_id[26].value <= threshold=25.83333396911621 |
| node_225: feature_name=Flu.B_Phu/.HA1+HA2               | feature_id[19].value > threshold=54802.5            |
| node_273: feature_name=hCoV.HKU1.S1_AA1.760             | feature_id[39].value <= threshold=45921.66796875    |
| Class: healthcare workers 60–180 days after vaccination |                                                     |
|                                                         |                                                     |
| Rules_30                                                | passed counts:10                                    |



|                                                            |                                                     |
|------------------------------------------------------------|-----------------------------------------------------|
| node_0: feature_name=HuIgG_0.10                            | feature_id[2].value > threshold=19120.166015625     |
| node_96: feature_name=a-HuIgG_0.03                         | feature_id[7].value <= threshold=19665.666015625    |
| node_97: feature_name=MERS.CoV.S1.RBD.367.606.rFcTag       | feature_id[5].value > threshold=3252.625            |
| node_201: feature_name=SARS.CoV.2.S2                       | feature_id[29].value <= threshold=37167.458984375   |
| node_202: feature_name=SARS.CoV.2.Spike.RBD.His.Bac        | feature_id[1].value > threshold=16030.75048828125   |
| node_212: feature_name=a-MoIgA_0.30                        | feature_id[37].value > threshold=1303.0             |
| node_224: feature_name=HuIgA_0.03                          | feature_id[26].value <= threshold=25.83333396911621 |
| node_225: feature_name=Flu.B_Phu/.HA1+HA2                  | feature_id[19].value <= threshold=54802.5           |
| node_226: feature_name=hCoV.HKU1.NP                        | feature_id[11].value > threshold=13460.3330078125   |
| node_270: feature_name=Flu.H3N2.HA1                        | feature_id[25].value > threshold=35417.583984375    |
| Class: healthcare workers within 60 days after vaccination |                                                     |
|                                                            |                                                     |
| Rules_31                                                   | passed counts:9                                     |
| node_0: feature_name=HuIgG_0.10                            | feature_id[2].value > threshold=19120.166015625     |
| node_96: feature_name=a-HuIgG_0.03                         | feature_id[7].value <= threshold=19665.666015625    |
| node_97: feature_name=MERS.CoV.S1.RBD.367.606.rFcTag       | feature_id[5].value <= threshold=3252.625           |
| node_98: feature_name=SARS.CoV.2.S2                        | feature_id[29].value <= threshold=9506.32470703125  |
| node_99: feature_name=SARS.CoV.2.S1.RBD.mFc                | feature_id[28].value <= threshold=4672.199844360352 |
| node_100: feature_name=a-MoIgA_0.03                        | feature_id[24].value > threshold=14.999999523162842 |
| node_106: feature_name=HuIgM_0.10                          | feature_id[6].value <= threshold=65.66666793823242  |
| Class: unvaccinated healthcare workers                     |                                                     |
|                                                            |                                                     |
| Rules_32                                                   | passed counts:8                                     |
| node_0: feature_name=HuIgG_0.10                            | feature_id[2].value > threshold=19120.166015625     |
| node_96: feature_name=a-HuIgG_0.03                         | feature_id[7].value > threshold=19665.666015625     |

|                                                         |                                                     |
|---------------------------------------------------------|-----------------------------------------------------|
| node_350: feature_name=HuIgM_0.03                       | feature_id[14].value <= threshold=-189.0            |
| node_351: feature_name=hCoV.OC43.HE                     | feature_id[33].value > threshold=15191.9169921875   |
| Class: healthcare workers 60–180 days after vaccination |                                                     |
|                                                         |                                                     |
| Rules_33                                                | passed counts:8                                     |
| node_0: feature_name=HuIgG_0.10                         | feature_id[2].value > threshold=19120.166015625     |
| node_96: feature_name=a-HuIgG_0.03                      | feature_id[7].value <= threshold=19665.666015625    |
| node_97: feature_name=MERS.CoV.S1.RBD.367.606.rFcTag    | feature_id[5].value <= threshold=3252.625           |
| node_98: feature_name=SARS.CoV.2.S2                     | feature_id[29].value > threshold=9506.32470703125   |
| node_116: feature_name=Flu.H1N1.HA1+HA2                 | feature_id[10].value > threshold=54065.41796875     |
| node_194: feature_name=MERS.CoV.S1.RBD.367.606.rFcTag   | feature_id[5].value > threshold=2551.3333740234375  |
| node_198: feature_name=HuIgA_0.03                       | feature_id[26].value <= threshold=884.3333129882812 |
| Class: healthcare workers 60–180 days after vaccination |                                                     |
|                                                         |                                                     |
| Rules_34                                                | passed counts:8                                     |
| node_0: feature_name=HuIgG_0.10                         | feature_id[2].value > threshold=19120.166015625     |
| node_96: feature_name=a-HuIgG_0.03                      | feature_id[7].value <= threshold=19665.666015625    |
| node_97: feature_name=MERS.CoV.S1.RBD.367.606.rFcTag    | feature_id[5].value <= threshold=3252.625           |
| node_98: feature_name=SARS.CoV.2.S2                     | feature_id[29].value > threshold=9506.32470703125   |
| node_116: feature_name=Flu.H1N1.HA1+HA2                 | feature_id[10].value <= threshold=54065.41796875    |
| node_117: feature_name=SARS.CoV.S1.RBD.rFcTag           | feature_id[16].value <= threshold=24639.0           |
| node_118: feature_name=SARS.CoV.2.Spike.RBD.His.Bac     | feature_id[1].value > threshold=23841.4169921875    |
| node_128: feature_name=SARS.CoV.2.S1+S2                 | feature_id[17].value > threshold=41778.25           |
| node_138: feature_name=hCoV.NL63.S1_S2                  | feature_id[13].value > threshold=35816.083984375    |
| node_146: feature_name=a-MoIgG_0.10                     | feature_id[27].value > threshold=3760.5             |

|                                                            |                                                      |
|------------------------------------------------------------|------------------------------------------------------|
| node_156: feature_name=a-HuIgG_0.03                        | feature_id[7].value > threshold=9740.8330078125      |
| node_158: feature_name=a-HuIgG_0.30                        | feature_id[4].value > threshold=42960.0              |
| node_160: feature_name=hCoV.HKU1.NP                        | feature_id[11].value > threshold=3927.666748046875   |
| node_162: feature_name=HuIgA_0.03                          | feature_id[26].value <= threshold=595.6666870117188  |
| Class: healthcare workers within 60 days after vaccination |                                                      |
| Rules_35                                                   | passed counts:8                                      |
| node_0: feature_name=HuIgG_0.10                            | feature_id[2].value > threshold=19120.166015625      |
| node_96: feature_name=a-HuIgG_0.03                         | feature_id[7].value <= threshold=19665.666015625     |
| node_97: feature_name=MERS.CoV.S1.RBD.367.606.rFcTag       | feature_id[5].value <= threshold=3252.625            |
| node_98: feature_name=SARS.CoV.2.S2                        | feature_id[29].value > threshold=9506.32470703125    |
| node_116: feature_name=Flu.H1N1.HA1+HA2                    | feature_id[10].value <= threshold=54065.41796875     |
| node_117: feature_name=SARS.CoV.S1.RBD.rFcTag              | feature_id[16].value <= threshold=24639.0            |
| node_118: feature_name=SARS.CoV.2.Spike.RBD.His.Bac        | feature_id[1].value > threshold=23841.4169921875     |
| node_128: feature_name=SARS.CoV.2.S1+S2                    | feature_id[17].value > threshold=41778.25            |
| node_138: feature_name=hCoV.NL63.S1_S2                     | feature_id[13].value > threshold=35816.083984375     |
| node_146: feature_name=a-MoIgG_0.10                        | feature_id[27].value <= threshold=3760.5             |
| node_147: feature_name=SARS.CoV.S1.HisTag                  | feature_id[18].value <= threshold=3759.5833740234375 |
| Class: healthcare workers 60–180 days after vaccination    |                                                      |
| Rules_36                                                   | passed counts:8                                      |
| node_0: feature_name=HuIgG_0.10                            | feature_id[2].value <= threshold=19120.166015625     |
| node_1: feature_name=SARS.CoV.2.S1.RBD.mFc                 | feature_id[28].value > threshold=3773.8334350585938  |
| node_9: feature_name=HuIgM_0.03                            | feature_id[14].value > threshold=-88.33333206176758  |
| node_27: feature_name=hCoV.HKU1.S1_S2                      | feature_id[32].value <= threshold=42767.0            |

|                                                           |                                                      |
|-----------------------------------------------------------|------------------------------------------------------|
| node_28: feature_name=HuIgG_0.03                          | feature_id[0].value > threshold=1005.0               |
| node_38: feature_name=a-HuIgG_0.30                        | feature_id[4].value <= threshold=33596.333984375     |
| node_39: feature_name=SARS.CoV.S1.HisTag                  | feature_id[18].value > threshold=400.3000030517578   |
| node_43: feature_name=HuIgM_0.10                          | feature_id[6].value <= threshold=109.66666793823242  |
| node_44: feature_name=MERS.CoV.NP                         | feature_id[15].value > threshold=-50.125             |
| node_46: feature_name=hCoV.229E.S1_S2                     | feature_id[35].value <= threshold=42044.208984375    |
| node_47: feature_name=HuIgM_0.30                          | feature_id[8].value <= threshold=1223.5              |
| node_48: feature_name=SARS.CoV.S1.RBD.rFcTag              | feature_id[16].value > threshold=27979.533203125     |
| node_50: feature_name=Flu.H3N2.HA1+HA2                    | feature_id[38].value > threshold=39487.333984375     |
| Class: healthcare workers 60–180 days after vaccination   |                                                      |
|                                                           |                                                      |
| Rules_37                                                  | passed counts:8                                      |
| node_0: feature_name=HuIgG_0.10                           | feature_id[2].value <= threshold=19120.166015625     |
| node_1: feature_name=SARS.CoV.2.S1.RBD.mFc                | feature_id[28].value > threshold=3773.8334350585938  |
| node_9: feature_name=HuIgM_0.03                           | feature_id[14].value <= threshold=-88.33333206176758 |
| node_10: feature_name=HuIgA_0.03                          | feature_id[26].value <= threshold=304.5              |
| node_11: feature_name=Flu.H1N1.HA1+HA2                    | feature_id[10].value > threshold=53444.666015625     |
| node_19: feature_name=a-MoIgA_0.03                        | feature_id[24].value > threshold=-97.16666793823242  |
| node_21: feature_name=a-MoIgA_0.03                        | feature_id[24].value <= threshold=0.6666666269302368 |
| Class: healthcare workers over 180 days after vaccination |                                                      |
|                                                           |                                                      |
| Rules_38                                                  | passed counts:7                                      |
| node_0: feature_name=HuIgG_0.10                           | feature_id[2].value > threshold=19120.166015625      |
| node_96: feature_name=a-HuIgG_0.03                        | feature_id[7].value <= threshold=19665.666015625     |
| node_97: feature_name=MERS.CoV.S1.RBD.367.606.rFcTag      | feature_id[5].value > threshold=3252.625             |

|                                                            |                                                      |
|------------------------------------------------------------|------------------------------------------------------|
| node_201: feature_name=SARS.CoV.2.S2                       | feature_id[29].value > threshold=37167.458984375     |
| node_301: feature_name=SARS.CoV.2.S1.mFcTag                | feature_id[21].value > threshold=53322.333984375     |
| node_321: feature_name=a-MoIgA_0.03                        | feature_id[24].value > threshold=212.0               |
| Class: healthcare workers 60–180 days after vaccination    |                                                      |
|                                                            |                                                      |
| Rules_39                                                   | passed counts:7                                      |
| node_0: feature_name=HuIgG_0.10                            | feature_id[2].value > threshold=19120.166015625      |
| node_96: feature_name=a-HuIgG_0.03                         | feature_id[7].value <= threshold=19665.666015625     |
| node_97: feature_name=MERS.CoV.S1.RBD.367.606.rFcTag       | feature_id[5].value > threshold=3252.625             |
| node_201: feature_name=SARS.CoV.2.S2                       | feature_id[29].value <= threshold=37167.458984375    |
| node_202: feature_name=SARS.CoV.2.Spike.RBD.His.Bac        | feature_id[1].value > threshold=16030.75048828125    |
| node_212: feature_name=a-MoIgA_0.30                        | feature_id[37].value > threshold=1303.0              |
| node_224: feature_name=HuIgA_0.03                          | feature_id[26].value > threshold=25.83333396911621   |
| node_276: feature_name=hCoV.OC43.NP                        | feature_id[23].value <= threshold=3591.10009765625   |
| node_277: feature_name=hCoV.229E.S1                        | feature_id[30].value <= threshold=28616.0            |
| node_278: feature_name=a-MoIgA_0.03                        | feature_id[24].value <= threshold=-30.66666603088379 |
| node_279: feature_name=MERS.CoV.NP                         | feature_id[15].value <= threshold=8498.916748046875  |
| Class: healthcare workers within 60 days after vaccination |                                                      |
|                                                            |                                                      |
| Rules_40                                                   | passed counts:7                                      |
| node_0: feature_name=HuIgG_0.10                            | feature_id[2].value > threshold=19120.166015625      |
| node_96: feature_name=a-HuIgG_0.03                         | feature_id[7].value <= threshold=19665.666015625     |
| node_97: feature_name=MERS.CoV.S1.RBD.367.606.rFcTag       | feature_id[5].value > threshold=3252.625             |
| node_201: feature_name=SARS.CoV.2.S2                       | feature_id[29].value <= threshold=37167.458984375    |
| node_202: feature_name=SARS.CoV.2.Spike.RBD.His.Bac        | feature_id[1].value > threshold=16030.75048828125    |

|                                                            |                                                       |
|------------------------------------------------------------|-------------------------------------------------------|
| node_212: feature_name=a-MoIgA_0.30                        | feature_id[37].value > threshold=1303.0               |
| node_224: feature_name=HuIgA_0.03                          | feature_id[26].value <= threshold=25.83333396911621   |
| node_225: feature_name=Flu.B_Phu/.HA1+HA2                  | feature_id[19].value <= threshold=54802.5             |
| node_226: feature_name=hCoV.HKU1.NP                        | feature_id[11].value <= threshold=13460.3330078125    |
| node_227: feature_name=MoIgG_0.30                          | feature_id[34].value <= threshold=3760.5              |
| Class: healthcare workers within 60 days after vaccination |                                                       |
|                                                            |                                                       |
| Rules_41                                                   | passed counts:7                                       |
| node_0: feature_name=HuIgG_0.10                            | feature_id[2].value > threshold=19120.166015625       |
| node_96: feature_name=a-HuIgG_0.03                         | feature_id[7].value <= threshold=19665.666015625      |
| node_97: feature_name=MERS.CoV.S1.RBD.367.606.rFcTag       | feature_id[5].value <= threshold=3252.625             |
| node_98: feature_name=SARS.CoV.2.S2                        | feature_id[29].value > threshold=9506.32470703125     |
| node_116: feature_name=Flu.H1N1.HA1+HA2                    | feature_id[10].value <= threshold=54065.41796875      |
| node_117: feature_name=SARS.CoV.S1.RBD.rFcTag              | feature_id[16].value > threshold=24639.0              |
| node_167: feature_name=hCoV.OC43.HE                        | feature_id[33].value <= threshold=32466.5830078125    |
| node_168: feature_name=HuIgM_0.10                          | feature_id[6].value > threshold=22.833333015441895    |
| node_178: feature_name=a-MoIgA_0.03                        | feature_id[24].value <= threshold=-34.333333015441895 |
| node_179: feature_name=Flu.H3N2.HA1+HA2                    | feature_id[38].value <= threshold=54266.91796875      |
| node_180: feature_name=a-HuIgG_0.03                        | feature_id[7].value > threshold=11043.33349609375     |
| Class: healthcare workers 60–180 days after vaccination    |                                                       |
|                                                            |                                                       |
| Rules_42                                                   | passed counts:7                                       |
| node_0: feature_name=HuIgG_0.10                            | feature_id[2].value > threshold=19120.166015625       |
| node_96: feature_name=a-HuIgG_0.03                         | feature_id[7].value <= threshold=19665.666015625      |
| node_97: feature_name=MERS.CoV.S1.RBD.367.606.rFcTag       | feature_id[5].value <= threshold=3252.625             |

|                                                            |                                                     |
|------------------------------------------------------------|-----------------------------------------------------|
| node_98: feature_name=SARS.CoV.2.S2                        | feature_id[29].value <= threshold=9506.32470703125  |
| node_99: feature_name=SARS.CoV.2.S1.RBD.mFc                | feature_id[28].value > threshold=4672.199844360352  |
| node_111: feature_name=HuIgM_0.10                          | feature_id[6].value > threshold=-30.333333015441895 |
| Class: healthcare workers 60–180 days after vaccination    |                                                     |
|                                                            |                                                     |
| Rules_43                                                   | passed counts:7                                     |
| node_0: feature_name=HuIgG_0.10                            | feature_id[2].value <= threshold=19120.166015625    |
| node_1: feature_name=SARS.CoV.2.S1.RBD.mFc                 | feature_id[28].value > threshold=3773.8334350585938 |
| node_9: feature_name=HuIgM_0.03                            | feature_id[14].value > threshold=-88.33333206176758 |
| node_27: feature_name=hCoV.HKU1.S1_S2                      | feature_id[32].value <= threshold=42767.0           |
| node_28: feature_name=HuIgG_0.03                           | feature_id[0].value > threshold=1005.0              |
| node_38: feature_name=a-HuIgG_0.30                         | feature_id[4].value > threshold=33596.333984375     |
| node_60: feature_name=a-HuIgG_0.03                         | feature_id[7].value <= threshold=10366.5            |
| node_61: feature_name=Flu.H3N2.HA1                         | feature_id[25].value > threshold=29968.0830078125   |
| node_65: feature_name=HuIgG_0.30                           | feature_id[36].value <= threshold=36026.0           |
| Class: healthcare workers within 60 days after vaccination |                                                     |
|                                                            |                                                     |
| Rules_44                                                   | passed counts:7                                     |
| node_0: feature_name=HuIgG_0.10                            | feature_id[2].value <= threshold=19120.166015625    |
| node_1: feature_name=SARS.CoV.2.S1.RBD.mFc                 | feature_id[28].value > threshold=3773.8334350585938 |
| node_9: feature_name=HuIgM_0.03                            | feature_id[14].value > threshold=-88.33333206176758 |
| node_27: feature_name=hCoV.HKU1.S1_S2                      | feature_id[32].value <= threshold=42767.0           |
| node_28: feature_name=HuIgG_0.03                           | feature_id[0].value <= threshold=1005.0             |
| node_29: feature_name=SARS.CoV.2.S1.mFcTag                 | feature_id[21].value > threshold=34194.916015625    |
| node_35: feature_name=a-HuIgG_0.10                         | feature_id[3].value <= threshold=15372.16650390625  |

|                                                            |                                                      |
|------------------------------------------------------------|------------------------------------------------------|
| Class: healthcare workers 60–180 days after vaccination    |                                                      |
|                                                            |                                                      |
| Rules_45                                                   | passed counts:7                                      |
| node_0: feature_name=HuIgG_0.10                            | feature_id[2].value <= threshold=19120.166015625     |
| node_1: feature_name=SARS.CoV.2.S1.RBD.mFc                 | feature_id[28].value > threshold=3773.8334350585938  |
| node_9: feature_name=HuIgM_0.03                            | feature_id[14].value <= threshold=-88.33333206176758 |
| node_10: feature_name=HuIgA_0.03                           | feature_id[26].value <= threshold=304.5              |
| node_11: feature_name=Flu.H1N1.HA1+HA2                     | feature_id[10].value > threshold=53444.666015625     |
| node_19: feature_name=a-MoIgA_0.03                         | feature_id[24].value <= threshold=-97.16666793823242 |
| Class: healthcare workers 60–180 days after vaccination    |                                                      |
|                                                            |                                                      |
| Rules_46                                                   | passed counts:6                                      |
| node_0: feature_name=HuIgG_0.10                            | feature_id[2].value > threshold=19120.166015625      |
| node_96: feature_name=a-HuIgG_0.03                         | feature_id[7].value <= threshold=19665.666015625     |
| node_97: feature_name=MERS.CoV.S1.RBD.367.606.rFcTag       | feature_id[5].value > threshold=3252.625             |
| node_201: feature_name=SARS.CoV.2.S2                       | feature_id[29].value <= threshold=37167.458984375    |
| node_202: feature_name=SARS.CoV.2.Spike.RBD.His.Bac        | feature_id[1].value > threshold=16030.75048828125    |
| node_212: feature_name=a-MoIgA_0.30                        | feature_id[37].value > threshold=1303.0              |
| node_224: feature_name=HuIgA_0.03                          | feature_id[26].value <= threshold=25.83333396911621  |
| node_225: feature_name=Flu.B_Phu/.HA1+HA2                  | feature_id[19].value <= threshold=54802.5            |
| node_226: feature_name=hCoV.HKU1.NP                        | feature_id[11].value <= threshold=13460.3330078125   |
| node_227: feature_name=MoIgG_0.30                          | feature_id[34].value > threshold=3760.5              |
| node_229: feature_name=HuIgM_0.10                          | feature_id[6].value <= threshold=-87.16666412353516  |
| node_230: feature_name=hCoV.229E.S1                        | feature_id[30].value <= threshold=39693.333984375    |
| Class: healthcare workers within 60 days after vaccination |                                                      |



|                                                         |                                                     |
|---------------------------------------------------------|-----------------------------------------------------|
|                                                         |                                                     |
| Rules_47                                                | passed counts:6                                     |
| node_0: feature_name=HuIgG_0.10                         | feature_id[2].value > threshold=19120.166015625     |
| node_96: feature_name=a-HuIgG_0.03                      | feature_id[7].value <= threshold=19665.666015625    |
| node_97: feature_name=MERS.CoV.S1.RBD.367.606.rFcTag    | feature_id[5].value <= threshold=3252.625           |
| node_98: feature_name=SARS.CoV.2.S2                     | feature_id[29].value > threshold=9506.32470703125   |
| node_116: feature_name=Flu.H1N1.HA1+HA2                 | feature_id[10].value <= threshold=54065.41796875    |
| node_117: feature_name=SARS.CoV.S1.RBD.rFcTag           | feature_id[16].value <= threshold=24639.0           |
| node_118: feature_name=SARS.CoV.2.Spike.RBD.His.Bac     | feature_id[1].value > threshold=23841.4169921875    |
| node_128: feature_name=SARS.CoV.2.S1+S2                 | feature_id[17].value > threshold=41778.25           |
| node_138: feature_name=hCoV.NL63.S1_S2                  | feature_id[13].value > threshold=35816.083984375    |
| node_146: feature_name=a-MoIgG_0.10                     | feature_id[27].value <= threshold=3760.5            |
| node_147: feature_name=SARS.CoV.S1.HisTag               | feature_id[18].value > threshold=3759.5833740234375 |
| node_149: feature_name=SARS.CoV.S1.HisTag               | feature_id[18].value > threshold=4886.25            |
| node_151: feature_name=HuIgM_0.30                       | feature_id[8].value > threshold=518.0000152587891   |
| Class: healthcare workers 60–180 days after vaccination |                                                     |
|                                                         |                                                     |
| Rules_48                                                | passed counts:6                                     |
| node_0: feature_name=HuIgG_0.10                         | feature_id[2].value > threshold=19120.166015625     |
| node_96: feature_name=a-HuIgG_0.03                      | feature_id[7].value <= threshold=19665.666015625    |
| node_97: feature_name=MERS.CoV.S1.RBD.367.606.rFcTag    | feature_id[5].value <= threshold=3252.625           |
| node_98: feature_name=SARS.CoV.2.S2                     | feature_id[29].value > threshold=9506.32470703125   |
| node_116: feature_name=Flu.H1N1.HA1+HA2                 | feature_id[10].value <= threshold=54065.41796875    |
| node_117: feature_name=SARS.CoV.S1.RBD.rFcTag           | feature_id[16].value <= threshold=24639.0           |
| node_118: feature_name=SARS.CoV.2.Spike.RBD.His.Bac     | feature_id[1].value > threshold=23841.4169921875    |

|                                                            |                                                     |
|------------------------------------------------------------|-----------------------------------------------------|
| node_128: feature_name=SARS.CoV.2.S1+S2                    | feature_id[17].value > threshold=41778.25           |
| node_138: feature_name=hCoV.NL63.S1_S2                     | feature_id[13].value > threshold=35816.083984375    |
| node_146: feature_name=a-MoIgG_0.10                        | feature_id[27].value <= threshold=3760.5            |
| node_147: feature_name=SARS.CoV.S1.HisTag                  | feature_id[18].value > threshold=3759.5833740234375 |
| node_149: feature_name=SARS.CoV.S1.HisTag                  | feature_id[18].value <= threshold=4886.25           |
| Class: healthcare workers within 60 days after vaccination |                                                     |
|                                                            |                                                     |
| Rules_49                                                   | passed counts:5                                     |
| node_0: feature_name=HuIgG_0.10                            | feature_id[2].value > threshold=19120.166015625     |
| node_96: feature_name=a-HuIgG_0.03                         | feature_id[7].value > threshold=19665.666015625     |
| node_350: feature_name=HuIgM_0.03                          | feature_id[14].value > threshold=-189.0             |
| node_354: feature_name=HuIgM_0.30                          | feature_id[8].value > threshold=441.8333282470703   |
| node_356: feature_name=a-HuIgG_0.10                        | feature_id[3].value <= threshold=32914.5            |
| node_357: feature_name=MERS.CoV.S1.RBD.367.606.rFcTag      | feature_id[5].value <= threshold=6711.89990234375   |
| Class: healthcare workers 60–180 days after vaccination    |                                                     |
|                                                            |                                                     |
| Rules_50                                                   | passed counts:5                                     |
| node_0: feature_name=HuIgG_0.10                            | feature_id[2].value > threshold=19120.166015625     |
| node_96: feature_name=a-HuIgG_0.03                         | feature_id[7].value <= threshold=19665.666015625    |
| node_97: feature_name=MERS.CoV.S1.RBD.367.606.rFcTag       | feature_id[5].value > threshold=3252.625            |
| node_201: feature_name=SARS.CoV.2.S2                       | feature_id[29].value > threshold=37167.458984375    |
| node_301: feature_name=SARS.CoV.2.S1.mFcTag                | feature_id[21].value > threshold=53322.333984375    |
| node_321: feature_name=a-MoIgA_0.03                        | feature_id[24].value <= threshold=212.0             |
| node_322: feature_name=Flu.H3N2.HA1                        | feature_id[25].value > threshold=37503.517578125    |
| node_330: feature_name=a-MoIgG_0.03                        | feature_id[12].value > threshold=556.6666564941406  |

|                                                            |                                                     |
|------------------------------------------------------------|-----------------------------------------------------|
| node_344: feature_name=a-HuIgG_0.10                        | feature_id[3].value <= threshold=30472.333984375    |
| node_345: feature_name=MoIgG_0.30                          | feature_id[34].value > threshold=6414.66650390625   |
| Class: healthcare workers 60–180 days after vaccination    |                                                     |
|                                                            |                                                     |
| Rules_51                                                   | passed counts:5                                     |
| node_0: feature_name=HuIgG_0.10                            | feature_id[2].value > threshold=19120.166015625     |
| node_96: feature_name=a-HuIgG_0.03                         | feature_id[7].value <= threshold=19665.666015625    |
| node_97: feature_name=MERS.CoV.S1.RBD.367.606.rFcTag       | feature_id[5].value > threshold=3252.625            |
| node_201: feature_name=SARS.CoV.2.S2                       | feature_id[29].value > threshold=37167.458984375    |
| node_301: feature_name=SARS.CoV.2.S1.mFcTag                | feature_id[21].value > threshold=53322.333984375    |
| node_321: feature_name=a-MoIgA_0.03                        | feature_id[24].value <= threshold=212.0             |
| node_322: feature_name=Flu.H3N2.HA1                        | feature_id[25].value > threshold=37503.517578125    |
| node_330: feature_name=a-MoIgG_0.03                        | feature_id[12].value <= threshold=556.6666564941406 |
| node_331: feature_name=hCoV.229E.S1_S2                     | feature_id[35].value <= threshold=47263.833984375   |
| node_332: feature_name=a-HuIgG_0.10                        | feature_id[3].value <= threshold=30393.166015625    |
| node_333: feature_name=hCoV.OC43.HE                        | feature_id[33].value <= threshold=25792.5830078125  |
| Class: healthcare workers within 60 days after vaccination |                                                     |
|                                                            |                                                     |
| Rules_52                                                   | passed counts:5                                     |
| node_0: feature_name=HuIgG_0.10                            | feature_id[2].value > threshold=19120.166015625     |
| node_96: feature_name=a-HuIgG_0.03                         | feature_id[7].value <= threshold=19665.666015625    |
| node_97: feature_name=MERS.CoV.S1.RBD.367.606.rFcTag       | feature_id[5].value > threshold=3252.625            |
| node_201: feature_name=SARS.CoV.2.S2                       | feature_id[29].value <= threshold=37167.458984375   |
| node_202: feature_name=SARS.CoV.2.Spike.RBD.His.Bac        | feature_id[1].value > threshold=16030.75048828125   |
| node_212: feature_name=a-MoIgA_0.30                        | feature_id[37].value > threshold=1303.0             |

|                                                            |                                                     |
|------------------------------------------------------------|-----------------------------------------------------|
| node_224: feature_name=HuIgA_0.03                          | feature_id[26].value <= threshold=25.83333396911621 |
| node_225: feature_name=Flu.B_Phu/.HA1+HA2                  | feature_id[19].value <= threshold=54802.5           |
| node_226: feature_name=hCoV.HKU1.NP                        | feature_id[11].value <= threshold=13460.3330078125  |
| node_227: feature_name=MoIgG_0.30                          | feature_id[34].value > threshold=3760.5             |
| node_229: feature_name=HuIgM_0.10                          | feature_id[6].value > threshold=-87.16666412353516  |
| node_233: feature_name=a-HuIgG_0.10                        | feature_id[3].value > threshold=27244.3330078125    |
| node_235: feature_name=SARS.CoV.S1.RBD.rFcTag              | feature_id[16].value <= threshold=20123.43359375    |
| node_236: feature_name=MERS.CoV.S1.RBD.367.606.rFcTag      | feature_id[5].value > threshold=4326.625            |
| node_238: feature_name=SARS.CoV.NP                         | feature_id[31].value <= threshold=2842.375          |
| Class: healthcare workers within 60 days after vaccination |                                                     |
|                                                            |                                                     |
| Rules_53                                                   | passed counts:5                                     |
| node_0: feature_name=HuIgG_0.10                            | feature_id[2].value > threshold=19120.166015625     |
| node_96: feature_name=a-HuIgG_0.03                         | feature_id[7].value <= threshold=19665.666015625    |
| node_97: feature_name=MERS.CoV.S1.RBD.367.606.rFcTag       | feature_id[5].value > threshold=3252.625            |
| node_201: feature_name=SARS.CoV.2.S2                       | feature_id[29].value <= threshold=37167.458984375   |
| node_202: feature_name=SARS.CoV.2.Spike.RBD.His.Bac        | feature_id[1].value > threshold=16030.75048828125   |
| node_212: feature_name=a-MoIgA_0.30                        | feature_id[37].value > threshold=1303.0             |
| node_224: feature_name=HuIgA_0.03                          | feature_id[26].value <= threshold=25.83333396911621 |
| node_225: feature_name=Flu.B_Phu/.HA1+HA2                  | feature_id[19].value <= threshold=54802.5           |
| node_226: feature_name=hCoV.HKU1.NP                        | feature_id[11].value <= threshold=13460.3330078125  |
| node_227: feature_name=MoIgG_0.30                          | feature_id[34].value > threshold=3760.5             |
| node_229: feature_name=HuIgM_0.10                          | feature_id[6].value > threshold=-87.16666412353516  |
| node_233: feature_name=a-HuIgG_0.10                        | feature_id[3].value <= threshold=27244.3330078125   |
| Class: healthcare workers within 60 days after vaccination |                                                     |

|                                                            |                                                      |
|------------------------------------------------------------|------------------------------------------------------|
| Rules_54                                                   | passed counts:5                                      |
| node_0: feature_name=HuIgG_0.10                            | feature_id[2].value > threshold=19120.166015625      |
| node_96: feature_name=a-HuIgG_0.03                         | feature_id[7].value <= threshold=19665.666015625     |
| node_97: feature_name=MERS.CoV.S1.RBD.367.606.rFcTag       | feature_id[5].value <= threshold=3252.625            |
| node_98: feature_name=SARS.CoV.2.S2                        | feature_id[29].value <= threshold=9506.32470703125   |
| node_99: feature_name=SARS.CoV.2.S1.RBD.mFc                | feature_id[28].value <= threshold=4672.199844360352  |
| node_100: feature_name=a-MoIgA_0.03                        | feature_id[24].value <= threshold=14.999999523162842 |
| node_101: feature_name=a-HuIgG_0.03                        | feature_id[7].value > threshold=313.1666564941406    |
| Class: healthcare workers within 60 days after vaccination |                                                      |
|                                                            |                                                      |
| Rules_55                                                   | passed counts:4                                      |
| node_0: feature_name=HuIgG_0.10                            | feature_id[2].value > threshold=19120.166015625      |
| node_96: feature_name=a-HuIgG_0.03                         | feature_id[7].value > threshold=19665.666015625      |
| node_350: feature_name=HuIgM_0.03                          | feature_id[14].value > threshold=-189.0              |
| node_354: feature_name=HuIgM_0.30                          | feature_id[8].value <= threshold=441.8333282470703   |
| Class: healthcare workers 60–180 days after vaccination    |                                                      |
|                                                            |                                                      |
| Rules_56                                                   | passed counts:4                                      |
| node_0: feature_name=HuIgG_0.10                            | feature_id[2].value > threshold=19120.166015625      |
| node_96: feature_name=a-HuIgG_0.03                         | feature_id[7].value <= threshold=19665.666015625     |
| node_97: feature_name=MERS.CoV.S1.RBD.367.606.rFcTag       | feature_id[5].value > threshold=3252.625             |
| node_201: feature_name=SARS.CoV.2.S2                       | feature_id[29].value > threshold=37167.458984375     |
| node_301: feature_name=SARS.CoV.2.S1.mFcTag                | feature_id[21].value > threshold=53322.333984375     |
| node_321: feature_name=a-MoIgA_0.03                        | feature_id[24].value <= threshold=212.0              |

|                                                            |                                                      |
|------------------------------------------------------------|------------------------------------------------------|
| node_322: feature_name=Flu.H3N2.HA1                        | feature_id[25].value > threshold=37503.517578125     |
| node_330: feature_name=a-MoIgG_0.03                        | feature_id[12].value <= threshold=556.6666564941406  |
| node_331: feature_name=hCoV.229E.S1_S2                     | feature_id[35].value > threshold=47263.833984375     |
| Class: healthcare workers within 60 days after vaccination |                                                      |
|                                                            |                                                      |
| Rules_57                                                   | passed counts:4                                      |
| node_0: feature_name=HuIgG_0.10                            | feature_id[2].value > threshold=19120.166015625      |
| node_96: feature_name=a-HuIgG_0.03                         | feature_id[7].value <= threshold=19665.666015625     |
| node_97: feature_name=MERS.CoV.S1.RBD.367.606.rFcTag       | feature_id[5].value > threshold=3252.625             |
| node_201: feature_name=SARS.CoV.2.S2                       | feature_id[29].value > threshold=37167.458984375     |
| node_301: feature_name=SARS.CoV.2.S1.mFcTag                | feature_id[21].value <= threshold=53322.333984375    |
| node_302: feature_name=MoIgG_0.03                          | feature_id[20].value <= threshold=18.166666507720947 |
| node_303: feature_name=MoIgG_0.30                          | feature_id[34].value <= threshold=7257.166748046875  |
| node_304: feature_name=hCoV.NL63.S1_S2                     | feature_id[13].value <= threshold=52607.083984375    |
| node_305: feature_name=HuIgG_0.30                          | feature_id[36].value <= threshold=35912.0            |
| node_306: feature_name=hCoV.229E.S1                        | feature_id[30].value <= threshold=31286.6669921875   |
| Class: healthcare workers within 60 days after vaccination |                                                      |
|                                                            |                                                      |
| Rules_58                                                   | passed counts:4                                      |
| node_0: feature_name=HuIgG_0.10                            | feature_id[2].value > threshold=19120.166015625      |
| node_96: feature_name=a-HuIgG_0.03                         | feature_id[7].value <= threshold=19665.666015625     |
| node_97: feature_name=MERS.CoV.S1.RBD.367.606.rFcTag       | feature_id[5].value > threshold=3252.625             |
| node_201: feature_name=SARS.CoV.2.S2                       | feature_id[29].value <= threshold=37167.458984375    |
| node_202: feature_name=SARS.CoV.2.Spike.RBD.His.Bac        | feature_id[1].value > threshold=16030.75048828125    |
| node_212: feature_name=a-MoIgA_0.30                        | feature_id[37].value > threshold=1303.0              |

|                                                            |                                                     |
|------------------------------------------------------------|-----------------------------------------------------|
| node_224: feature_name=HuIgA_0.03                          | feature_id[26].value > threshold=25.83333396911621  |
| node_276: feature_name=hCoV.OC43.NP                        | feature_id[23].value <= threshold=3591.10009765625  |
| node_277: feature_name=hCoV.229E.S1                        | feature_id[30].value <= threshold=28616.0           |
| node_278: feature_name=a-MoIgA_0.03                        | feature_id[24].value > threshold=-30.66666603088379 |
| node_282: feature_name=HuIgA_0.03                          | feature_id[26].value > threshold=965.3333435058594  |
| Class: healthcare workers within 60 days after vaccination |                                                     |
|                                                            |                                                     |
| Rules_59                                                   | passed counts:4                                     |
| node_0: feature_name=HuIgG_0.10                            | feature_id[2].value > threshold=19120.166015625     |
| node_96: feature_name=a-HuIgG_0.03                         | feature_id[7].value <= threshold=19665.666015625    |
| node_97: feature_name=MERS.CoV.S1.RBD.367.606.rFcTag       | feature_id[5].value > threshold=3252.625            |
| node_201: feature_name=SARS.CoV.2.S2                       | feature_id[29].value <= threshold=37167.458984375   |
| node_202: feature_name=SARS.CoV.2.Spike.RBD.His.Bac        | feature_id[1].value > threshold=16030.75048828125   |
| node_212: feature_name=a-MoIgA_0.30                        | feature_id[37].value > threshold=1303.0             |
| node_224: feature_name=HuIgA_0.03                          | feature_id[26].value <= threshold=25.83333396911621 |
| node_225: feature_name=Flu.B_Phu/.HA1+HA2                  | feature_id[19].value <= threshold=54802.5           |
| node_226: feature_name=hCoV.HKU1.NP                        | feature_id[11].value <= threshold=13460.3330078125  |
| node_227: feature_name=MoIgG_0.30                          | feature_id[34].value > threshold=3760.5             |
| node_229: feature_name=HuIgM_0.10                          | feature_id[6].value > threshold=-87.16666412353516  |
| node_233: feature_name=a-HuIgG_0.10                        | feature_id[3].value > threshold=27244.3330078125    |
| node_235: feature_name=SARS.CoV.S1.RBD.rFcTag              | feature_id[16].value > threshold=20123.43359375     |
| node_245: feature_name=hCoV.OC43.NP                        | feature_id[23].value > threshold=1775.816650390625  |
| node_253: feature_name=SARS.CoV.S1.RBD.rFcTag              | feature_id[16].value <= threshold=21641.4169921875  |
| Class: healthcare workers within 60 days after vaccination |                                                     |
|                                                            |                                                     |

|                                                            |                                                      |
|------------------------------------------------------------|------------------------------------------------------|
| Rules_60                                                   | passed counts:4                                      |
| node_0: feature_name=HuIgG_0.10                            | feature_id[2].value > threshold=19120.166015625      |
| node_96: feature_name=a-HuIgG_0.03                         | feature_id[7].value <= threshold=19665.666015625     |
| node_97: feature_name=MERS.CoV.S1.RBD.367.606.rFcTag       | feature_id[5].value > threshold=3252.625             |
| node_201: feature_name=SARS.CoV.2.S2                       | feature_id[29].value <= threshold=37167.458984375    |
| node_202: feature_name=SARS.CoV.2.Spike.RBD.His.Bac        | feature_id[1].value <= threshold=16030.75048828125   |
| node_203: feature_name=a-MoIgG_0.10                        | feature_id[27].value <= threshold=2117.9999389648438 |
| node_204: feature_name=Flu.H3N2.HA1+HA2                    | feature_id[38].value > threshold=44847.720703125     |
| Class: unvaccinated healthcare workers                     |                                                      |
|                                                            |                                                      |
| Rules_61                                                   | passed counts:4                                      |
| node_0: feature_name=HuIgG_0.10                            | feature_id[2].value > threshold=19120.166015625      |
| node_96: feature_name=a-HuIgG_0.03                         | feature_id[7].value <= threshold=19665.666015625     |
| node_97: feature_name=MERS.CoV.S1.RBD.367.606.rFcTag       | feature_id[5].value <= threshold=3252.625            |
| node_98: feature_name=SARS.CoV.2.S2                        | feature_id[29].value > threshold=9506.32470703125    |
| node_116: feature_name=Flu.H1N1.HA1+HA2                    | feature_id[10].value > threshold=54065.41796875      |
| node_194: feature_name=MERS.CoV.S1.RBD.367.606.rFcTag      | feature_id[5].value <= threshold=2551.3333740234375  |
| node_195: feature_name=a-HuIgG_0.03                        | feature_id[7].value <= threshold=17733.50048828125   |
| Class: healthcare workers within 60 days after vaccination |                                                      |
|                                                            |                                                      |
| Rules_62                                                   | passed counts:4                                      |
| node_0: feature_name=HuIgG_0.10                            | feature_id[2].value > threshold=19120.166015625      |
| node_96: feature_name=a-HuIgG_0.03                         | feature_id[7].value <= threshold=19665.666015625     |
| node_97: feature_name=MERS.CoV.S1.RBD.367.606.rFcTag       | feature_id[5].value <= threshold=3252.625            |
| node_98: feature_name=SARS.CoV.2.S2                        | feature_id[29].value > threshold=9506.32470703125    |



|                                                            |                                                       |
|------------------------------------------------------------|-------------------------------------------------------|
| node_116: feature_name=Flu.H1N1.HA1+HA2                    | feature_id[10].value <= threshold=54065.41796875      |
| node_117: feature_name=SARS.CoV.S1.RBD.rFcTag              | feature_id[16].value > threshold=24639.0              |
| node_167: feature_name=hCoV.OC43.HE                        | feature_id[33].value <= threshold=32466.5830078125    |
| node_168: feature_name=HuIgM_0.10                          | feature_id[6].value > threshold=22.833333015441895    |
| node_178: feature_name=a-MoIgA_0.03                        | feature_id[24].value <= threshold=-34.333333015441895 |
| node_179: feature_name=Flu.H3N2.HA1+HA2                    | feature_id[38].value > threshold=54266.91796875       |
| Class: healthcare workers within 60 days after vaccination |                                                       |
|                                                            |                                                       |
| Rules_63                                                   | passed counts:4                                       |
| node_0: feature_name=HuIgG_0.10                            | feature_id[2].value > threshold=19120.166015625       |
| node_96: feature_name=a-HuIgG_0.03                         | feature_id[7].value <= threshold=19665.666015625      |
| node_97: feature_name=MERS.CoV.S1.RBD.367.606.rFcTag       | feature_id[5].value <= threshold=3252.625             |
| node_98: feature_name=SARS.CoV.2.S2                        | feature_id[29].value > threshold=9506.32470703125     |
| node_116: feature_name=Flu.H1N1.HA1+HA2                    | feature_id[10].value <= threshold=54065.41796875      |
| node_117: feature_name=SARS.CoV.S1.RBD.rFcTag              | feature_id[16].value > threshold=24639.0              |
| node_167: feature_name=hCoV.OC43.HE                        | feature_id[33].value <= threshold=32466.5830078125    |
| node_168: feature_name=HuIgM_0.10                          | feature_id[6].value <= threshold=22.833333015441895   |
| node_169: feature_name=SARS.CoV.2.S1.mFcTag                | feature_id[21].value > threshold=54847.25             |
| node_175: feature_name=SARS.CoV.2.S1.RBD.mFc               | feature_id[28].value > threshold=49975.58203125       |
| Class: healthcare workers within 60 days after vaccination |                                                       |
|                                                            |                                                       |
| Rules_64                                                   | passed counts:4                                       |
| node_0: feature_name=HuIgG_0.10                            | feature_id[2].value > threshold=19120.166015625       |
| node_96: feature_name=a-HuIgG_0.03                         | feature_id[7].value <= threshold=19665.666015625      |
| node_97: feature_name=MERS.CoV.S1.RBD.367.606.rFcTag       | feature_id[5].value <= threshold=3252.625             |

|                                                            |                                                      |
|------------------------------------------------------------|------------------------------------------------------|
| node_98: feature_name=SARS.CoV.2.S2                        | feature_id[29].value > threshold=9506.32470703125    |
| node_116: feature_name=Flu.H1N1.HA1+HA2                    | feature_id[10].value <= threshold=54065.41796875     |
| node_117: feature_name=SARS.CoV.S1.RBD.rFcTag              | feature_id[16].value <= threshold=24639.0            |
| node_118: feature_name=SARS.CoV.2.Spike.RBD.His.Bac        | feature_id[1].value > threshold=23841.4169921875     |
| node_128: feature_name=SARS.CoV.2.S1+S2                    | feature_id[17].value <= threshold=41778.25           |
| node_129: feature_name=SARS.CoV.S1.HisTag                  | feature_id[18].value > threshold=3569.2833251953125  |
| node_133: feature_name=Flu.B_Mal/.HA1+HA2                  | feature_id[22].value <= threshold=47613.583984375    |
| Class: healthcare workers within 60 days after vaccination |                                                      |
|                                                            |                                                      |
| Rules_65                                                   | passed counts:4                                      |
| node_0: feature_name=HuIgG_0.10                            | feature_id[2].value > threshold=19120.166015625      |
| node_96: feature_name=a-HuIgG_0.03                         | feature_id[7].value <= threshold=19665.666015625     |
| node_97: feature_name=MERS.CoV.S1.RBD.367.606.rFcTag       | feature_id[5].value <= threshold=3252.625            |
| node_98: feature_name=SARS.CoV.2.S2                        | feature_id[29].value <= threshold=9506.32470703125   |
| node_99: feature_name=SARS.CoV.2.S1.RBD.mFc                | feature_id[28].value > threshold=4672.199844360352   |
| node_111: feature_name=HuIgM_0.10                          | feature_id[6].value <= threshold=-30.333333015441895 |
| node_112: feature_name=a-MoIgG_0.10                        | feature_id[27].value <= threshold=2261.1666259765625 |
| Class: healthcare workers over 180 days after vaccination  |                                                      |
|                                                            |                                                      |
| Rules_66                                                   | passed counts:4                                      |
| node_0: feature_name=HuIgG_0.10                            | feature_id[2].value <= threshold=19120.166015625     |
| node_1: feature_name=SARS.CoV.2.S1.RBD.mFc                 | feature_id[28].value > threshold=3773.8334350585938  |
| node_9: feature_name=HuIgM_0.03                            | feature_id[14].value > threshold=-88.33333206176758  |
| node_27: feature_name=hCoV.HKU1.S1_S2                      | feature_id[32].value > threshold=42767.0             |
| node_77: feature_name=Flu.B_Mal/.HA1                       | feature_id[9].value <= threshold=41191.69921875      |

|                                                            |                                                      |
|------------------------------------------------------------|------------------------------------------------------|
| node_78: feature_name=SARS.CoV.2.S1.mFcTag                 | feature_id[21].value > threshold=41709.720703125     |
| node_82: feature_name=HuIgM_0.10                           | feature_id[6].value <= threshold=-43.83333396911621  |
| node_83: feature_name=SARS.CoV.S1.HisTag                   | feature_id[18].value > threshold=8532.783203125      |
| Class: healthcare workers 60–180 days after vaccination    |                                                      |
|                                                            |                                                      |
| Rules_67                                                   | passed counts:4                                      |
| node_0: feature_name=HuIgG_0.10                            | feature_id[2].value <= threshold=19120.166015625     |
| node_1: feature_name=SARS.CoV.2.S1.RBD.mFc                 | feature_id[28].value > threshold=3773.8334350585938  |
| node_9: feature_name=HuIgM_0.03                            | feature_id[14].value <= threshold=-88.33333206176758 |
| node_10: feature_name=HuIgA_0.03                           | feature_id[26].value > threshold=304.5               |
| Class: healthcare workers 60–180 days after vaccination    |                                                      |
|                                                            |                                                      |
| Rules_68                                                   | passed counts:3                                      |
| node_0: feature_name=HuIgG_0.10                            | feature_id[2].value > threshold=19120.166015625      |
| node_96: feature_name=a-HuIgG_0.03                         | feature_id[7].value <= threshold=19665.666015625     |
| node_97: feature_name=MERS.CoV.S1.RBD.367.606.rFcTag       | feature_id[5].value > threshold=3252.625             |
| node_201: feature_name=SARS.CoV.2.S2                       | feature_id[29].value > threshold=37167.458984375     |
| node_301: feature_name=SARS.CoV.2.S1.mFcTag                | feature_id[21].value > threshold=53322.333984375     |
| node_321: feature_name=a-MoIgA_0.03                        | feature_id[24].value <= threshold=212.0              |
| node_322: feature_name=Flu.H3N2.HA1                        | feature_id[25].value > threshold=37503.517578125     |
| node_330: feature_name=a-MoIgG_0.03                        | feature_id[12].value > threshold=556.6666564941406   |
| node_344: feature_name=a-HuIgG_0.10                        | feature_id[3].value <= threshold=30472.333984375     |
| node_345: feature_name=MoIgG_0.30                          | feature_id[34].value <= threshold=6414.66650390625   |
| Class: healthcare workers within 60 days after vaccination |                                                      |
|                                                            |                                                      |

|                                                         |                                                      |
|---------------------------------------------------------|------------------------------------------------------|
| Rules_69                                                | passed counts:3                                      |
| node_0: feature_name=HuIgG_0.10                         | feature_id[2].value > threshold=19120.166015625      |
| node_96: feature_name=a-HuIgG_0.03                      | feature_id[7].value <= threshold=19665.666015625     |
| node_97: feature_name=MERS.CoV.S1.RBD.367.606.rFcTag    | feature_id[5].value > threshold=3252.625             |
| node_201: feature_name=SARS.CoV.2.S2                    | feature_id[29].value > threshold=37167.458984375     |
| node_301: feature_name=SARS.CoV.2.S1.mFcTag             | feature_id[21].value <= threshold=53322.333984375    |
| node_302: feature_name=MoIgG_0.03                       | feature_id[20].value <= threshold=18.166666507720947 |
| node_303: feature_name=MoIgG_0.30                       | feature_id[34].value > threshold=7257.166748046875   |
| node_315: feature_name=Flu.H3N2.HA1+HA2                 | feature_id[38].value > threshold=52402.140625        |
| Class: healthcare workers 60–180 days after vaccination |                                                      |
|                                                         |                                                      |
| Rules_70                                                | passed counts:3                                      |
| node_0: feature_name=HuIgG_0.10                         | feature_id[2].value > threshold=19120.166015625      |
| node_96: feature_name=a-HuIgG_0.03                      | feature_id[7].value <= threshold=19665.666015625     |
| node_97: feature_name=MERS.CoV.S1.RBD.367.606.rFcTag    | feature_id[5].value > threshold=3252.625             |
| node_201: feature_name=SARS.CoV.2.S2                    | feature_id[29].value > threshold=37167.458984375     |
| node_301: feature_name=SARS.CoV.2.S1.mFcTag             | feature_id[21].value <= threshold=53322.333984375    |
| node_302: feature_name=MoIgG_0.03                       | feature_id[20].value <= threshold=18.166666507720947 |
| node_303: feature_name=MoIgG_0.30                       | feature_id[34].value <= threshold=7257.166748046875  |
| node_304: feature_name=hCoV.NL63.S1_S2                  | feature_id[13].value <= threshold=52607.083984375    |
| node_305: feature_name=HuIgG_0.30                       | feature_id[36].value <= threshold=35912.0            |
| node_306: feature_name=hCoV.229E.S1                     | feature_id[30].value > threshold=31286.6669921875    |
| node_308: feature_name=SARS.CoV.2.S2                    | feature_id[29].value > threshold=41902.466796875     |
| Class: healthcare workers 60–180 days after vaccination |                                                      |
|                                                         |                                                      |

|                                                            |                                                    |
|------------------------------------------------------------|----------------------------------------------------|
| Rules_71                                                   | passed counts:3                                    |
| node_0: feature_name=HuIgG_0.10                            | feature_id[2].value > threshold=19120.166015625    |
| node_96: feature_name=a-HuIgG_0.03                         | feature_id[7].value <= threshold=19665.666015625   |
| node_97: feature_name=MERS.CoV.S1.RBD.367.606.rFcTag       | feature_id[5].value > threshold=3252.625           |
| node_201: feature_name=SARS.CoV.2.S2                       | feature_id[29].value <= threshold=37167.458984375  |
| node_202: feature_name=SARS.CoV.2.Spike.RBD.His.Bac        | feature_id[1].value > threshold=16030.75048828125  |
| node_212: feature_name=a-MoIgA_0.30                        | feature_id[37].value > threshold=1303.0            |
| node_224: feature_name=HuIgA_0.03                          | feature_id[26].value > threshold=25.83333396911621 |
| node_276: feature_name=hCoV.OC43.NP                        | feature_id[23].value > threshold=3591.10009765625  |
| node_290: feature_name=SARS.CoV.2.Spike.RBD.His.Bac        | feature_id[1].value > threshold=33649.125          |
| node_296: feature_name=HuIgM_0.03                          | feature_id[14].value <= threshold=-90.5            |
| node_297: feature_name=hCoV.OC43.HE                        | feature_id[33].value <= threshold=20650.0830078125 |
| Class: healthcare workers within 60 days after vaccination |                                                    |
|                                                            |                                                    |
| Rules_72                                                   | passed counts:3                                    |
| node_0: feature_name=HuIgG_0.10                            | feature_id[2].value > threshold=19120.166015625    |
| node_96: feature_name=a-HuIgG_0.03                         | feature_id[7].value <= threshold=19665.666015625   |
| node_97: feature_name=MERS.CoV.S1.RBD.367.606.rFcTag       | feature_id[5].value > threshold=3252.625           |
| node_201: feature_name=SARS.CoV.2.S2                       | feature_id[29].value <= threshold=37167.458984375  |
| node_202: feature_name=SARS.CoV.2.Spike.RBD.His.Bac        | feature_id[1].value > threshold=16030.75048828125  |
| node_212: feature_name=a-MoIgA_0.30                        | feature_id[37].value > threshold=1303.0            |
| node_224: feature_name=HuIgA_0.03                          | feature_id[26].value > threshold=25.83333396911621 |
| node_276: feature_name=hCoV.OC43.NP                        | feature_id[23].value > threshold=3591.10009765625  |
| node_290: feature_name=SARS.CoV.2.Spike.RBD.His.Bac        | feature_id[1].value <= threshold=33649.125         |
| node_291: feature_name=SARS.CoV.2.S1.mFcTag                | feature_id[21].value <= threshold=49171.599609375  |

|                                                            |                                                     |
|------------------------------------------------------------|-----------------------------------------------------|
| Class: healthcare workers 60–180 days after vaccination    |                                                     |
|                                                            |                                                     |
| Rules_73                                                   | passed counts:3                                     |
| node_0: feature_name=HuIgG_0.10                            | feature_id[2].value > threshold=19120.166015625     |
| node_96: feature_name=a-HuIgG_0.03                         | feature_id[7].value <= threshold=19665.666015625    |
| node_97: feature_name=MERS.CoV.S1.RBD.367.606.rFcTag       | feature_id[5].value > threshold=3252.625            |
| node_201: feature_name=SARS.CoV.2.S2                       | feature_id[29].value <= threshold=37167.458984375   |
| node_202: feature_name=SARS.CoV.2.Spike.RBD.His.Bac        | feature_id[1].value > threshold=16030.75048828125   |
| node_212: feature_name=a-MoIgA_0.30                        | feature_id[37].value > threshold=1303.0             |
| node_224: feature_name=HuIgA_0.03                          | feature_id[26].value <= threshold=25.83333396911621 |
| node_225: feature_name=Flu.B_Phu/.HA1+HA2                  | feature_id[19].value <= threshold=54802.5           |
| node_226: feature_name=hCoV.HKU1.NP                        | feature_id[11].value <= threshold=13460.3330078125  |
| node_227: feature_name=MoIgG_0.30                          | feature_id[34].value > threshold=3760.5             |
| node_229: feature_name=HuIgM_0.10                          | feature_id[6].value > threshold=-87.16666412353516  |
| node_233: feature_name=a-HuIgG_0.10                        | feature_id[3].value > threshold=27244.3330078125    |
| node_235: feature_name=SARS.CoV.S1.RBD.rFcTag              | feature_id[16].value > threshold=20123.43359375     |
| node_245: feature_name=hCoV.OC43.NP                        | feature_id[23].value > threshold=1775.816650390625  |
| node_253: feature_name=SARS.CoV.S1.RBD.rFcTag              | feature_id[16].value > threshold=21641.4169921875   |
| node_255: feature_name=HuIgA_0.03                          | feature_id[26].value > threshold=15.333333015441895 |
| Class: healthcare workers within 60 days after vaccination |                                                     |
|                                                            |                                                     |
| Rules_74                                                   | passed counts:3                                     |
| node_0: feature_name=HuIgG_0.10                            | feature_id[2].value > threshold=19120.166015625     |
| node_96: feature_name=a-HuIgG_0.03                         | feature_id[7].value <= threshold=19665.666015625    |
| node_97: feature_name=MERS.CoV.S1.RBD.367.606.rFcTag       | feature_id[5].value > threshold=3252.625            |

|                                                            |                                                      |
|------------------------------------------------------------|------------------------------------------------------|
| node_201: feature_name=SARS.CoV.2.S2                       | feature_id[29].value <= threshold=37167.458984375    |
| node_202: feature_name=SARS.CoV.2.Spike.RBD.His.Bac        | feature_id[1].value > threshold=16030.75048828125    |
| node_212: feature_name=a-MoIgA_0.30                        | feature_id[37].value > threshold=1303.0              |
| node_224: feature_name=HuIgA_0.03                          | feature_id[26].value <= threshold=25.83333396911621  |
| node_225: feature_name=Flu.B_Phu/.HA1+HA2                  | feature_id[19].value <= threshold=54802.5            |
| node_226: feature_name=hCoV.HKU1.NP                        | feature_id[11].value <= threshold=13460.3330078125   |
| node_227: feature_name=MoIgG_0.30                          | feature_id[34].value > threshold=3760.5              |
| node_229: feature_name=HuIgM_0.10                          | feature_id[6].value > threshold=-87.16666412353516   |
| node_233: feature_name=a-HuIgG_0.10                        | feature_id[3].value > threshold=27244.3330078125     |
| node_235: feature_name=SARS.CoV.S1.RBD.rFcTag              | feature_id[16].value > threshold=20123.43359375      |
| node_245: feature_name=hCoV.OC43.NP                        | feature_id[23].value > threshold=1775.816650390625   |
| node_253: feature_name=SARS.CoV.S1.RBD.rFcTag              | feature_id[16].value > threshold=21641.4169921875    |
| node_255: feature_name=HuIgA_0.03                          | feature_id[26].value <= threshold=15.333333015441895 |
| node_256: feature_name=Flu.H3N2.HA1                        | feature_id[25].value <= threshold=52674.0            |
| node_257: feature_name=hCoV.HKU1.S1_S2                     | feature_id[32].value <= threshold=37449.416015625    |
| node_258: feature_name=Flu.B_Mal/.HA1                      | feature_id[9].value > threshold=27139.75             |
| Class: healthcare workers within 60 days after vaccination |                                                      |
|                                                            |                                                      |
| Rules_75                                                   | passed counts:3                                      |
| node_0: feature_name=HuIgG_0.10                            | feature_id[2].value > threshold=19120.166015625      |
| node_96: feature_name=a-HuIgG_0.03                         | feature_id[7].value <= threshold=19665.666015625     |
| node_97: feature_name=MERS.CoV.S1.RBD.367.606.rFcTag       | feature_id[5].value > threshold=3252.625             |
| node_201: feature_name=SARS.CoV.2.S2                       | feature_id[29].value <= threshold=37167.458984375    |
| node_202: feature_name=SARS.CoV.2.Spike.RBD.His.Bac        | feature_id[1].value > threshold=16030.75048828125    |
| node_212: feature_name=a-MoIgA_0.30                        | feature_id[37].value > threshold=1303.0              |

|                                                         |                                                      |
|---------------------------------------------------------|------------------------------------------------------|
| node_224: feature_name=HuIgA_0.03                       | feature_id[26].value <= threshold=25.83333396911621  |
| node_225: feature_name=Flu.B_Phu/.HA1+HA2               | feature_id[19].value <= threshold=54802.5            |
| node_226: feature_name=hCoV.HKU1.NP                     | feature_id[11].value <= threshold=13460.3330078125   |
| node_227: feature_name=MoIgG_0.30                       | feature_id[34].value > threshold=3760.5              |
| node_229: feature_name=HuIgM_0.10                       | feature_id[6].value > threshold=-87.16666412353516   |
| node_233: feature_name=a-HuIgG_0.10                     | feature_id[3].value > threshold=27244.3330078125     |
| node_235: feature_name=SARS.CoV.S1.RBD.rFcTag           | feature_id[16].value > threshold=20123.43359375      |
| node_245: feature_name=hCoV.OC43.NP                     | feature_id[23].value <= threshold=1775.816650390625  |
| node_246: feature_name=HuIgA_0.03                       | feature_id[26].value > threshold=-10.333333492279053 |
| Class: healthcare workers 60–180 days after vaccination |                                                      |
|                                                         |                                                      |
| Rules_76                                                | passed counts:3                                      |
| node_0: feature_name=HuIgG_0.10                         | feature_id[2].value > threshold=19120.166015625      |
| node_96: feature_name=a-HuIgG_0.03                      | feature_id[7].value <= threshold=19665.666015625     |
| node_97: feature_name=MERS.CoV.S1.RBD.367.606.rFcTag    | feature_id[5].value > threshold=3252.625             |
| node_201: feature_name=SARS.CoV.2.S2                    | feature_id[29].value <= threshold=37167.458984375    |
| node_202: feature_name=SARS.CoV.2.Spike.RBD.His.Bac     | feature_id[1].value > threshold=16030.75048828125    |
| node_212: feature_name=a-MoIgA_0.30                     | feature_id[37].value > threshold=1303.0              |
| node_224: feature_name=HuIgA_0.03                       | feature_id[26].value <= threshold=25.83333396911621  |
| node_225: feature_name=Flu.B_Phu/.HA1+HA2               | feature_id[19].value <= threshold=54802.5            |
| node_226: feature_name=hCoV.HKU1.NP                     | feature_id[11].value <= threshold=13460.3330078125   |
| node_227: feature_name=MoIgG_0.30                       | feature_id[34].value > threshold=3760.5              |
| node_229: feature_name=HuIgM_0.10                       | feature_id[6].value > threshold=-87.16666412353516   |
| node_233: feature_name=a-HuIgG_0.10                     | feature_id[3].value > threshold=27244.3330078125     |
| node_235: feature_name=SARS.CoV.S1.RBD.rFcTag           | feature_id[16].value <= threshold=20123.43359375     |



|                                                            |                                                     |
|------------------------------------------------------------|-----------------------------------------------------|
| node_236: feature_name=MERS.CoV.S1.RBD.367.606.rFcTag      | feature_id[5].value > threshold=4326.625            |
| node_238: feature_name=SARS.CoV.NP                         | feature_id[31].value > threshold=2842.375           |
| node_240: feature_name=Flu.H1N1.HA1+HA2                    | feature_id[10].value > threshold=53053.666015625    |
| Class: healthcare workers within 60 days after vaccination |                                                     |
|                                                            |                                                     |
| Rules_77                                                   | passed counts:3                                     |
| node_0: feature_name=HuIgG_0.10                            | feature_id[2].value > threshold=19120.166015625     |
| node_96: feature_name=a-HuIgG_0.03                         | feature_id[7].value <= threshold=19665.666015625    |
| node_97: feature_name=MERS.CoV.S1.RBD.367.606.rFcTag       | feature_id[5].value > threshold=3252.625            |
| node_201: feature_name=SARS.CoV.2.S2                       | feature_id[29].value <= threshold=37167.458984375   |
| node_202: feature_name=SARS.CoV.2.Spike.RBD.His.Bac        | feature_id[1].value > threshold=16030.75048828125   |
| node_212: feature_name=a-MoIgA_0.30                        | feature_id[37].value <= threshold=1303.0            |
| node_213: feature_name=MERS.CoV.NP                         | feature_id[15].value <= threshold=898.7833251953125 |
| node_214: feature_name=hCoV.OC43.HE                        | feature_id[33].value <= threshold=13271.4169921875  |
| Class: healthcare workers 60–180 days after vaccination    |                                                     |
|                                                            |                                                     |
| Rules_78                                                   | passed counts:3                                     |
| node_0: feature_name=HuIgG_0.10                            | feature_id[2].value > threshold=19120.166015625     |
| node_96: feature_name=a-HuIgG_0.03                         | feature_id[7].value <= threshold=19665.666015625    |
| node_97: feature_name=MERS.CoV.S1.RBD.367.606.rFcTag       | feature_id[5].value <= threshold=3252.625           |
| node_98: feature_name=SARS.CoV.2.S2                        | feature_id[29].value > threshold=9506.32470703125   |
| node_116: feature_name=Flu.H1N1.HA1+HA2                    | feature_id[10].value <= threshold=54065.41796875    |
| node_117: feature_name=SARS.CoV.S1.RBD.rFcTag              | feature_id[16].value > threshold=24639.0            |
| node_167: feature_name=hCoV.OC43.HE                        | feature_id[33].value <= threshold=32466.5830078125  |
| node_168: feature_name=HuIgM_0.10                          | feature_id[6].value <= threshold=22.833333015441895 |

|                                                            |                                                     |
|------------------------------------------------------------|-----------------------------------------------------|
| node_169: feature_name=SARS.CoV.2.S1.mFcTag                | feature_id[21].value <= threshold=54847.25          |
| node_170: feature_name=a-MoIgG_0.03                        | feature_id[12].value > threshold=2342.8333740234375 |
| node_172: feature_name=HuIgM_0.03                          | feature_id[14].value > threshold=-66.33333206176758 |
| Class: healthcare workers within 60 days after vaccination |                                                     |
|                                                            |                                                     |
| Rules_79                                                   | passed counts:3                                     |
| node_0: feature_name=HuIgG_0.10                            | feature_id[2].value > threshold=19120.166015625     |
| node_96: feature_name=a-HuIgG_0.03                         | feature_id[7].value <= threshold=19665.666015625    |
| node_97: feature_name=MERS.CoV.S1.RBD.367.606.rFcTag       | feature_id[5].value <= threshold=3252.625           |
| node_98: feature_name=SARS.CoV.2.S2                        | feature_id[29].value > threshold=9506.32470703125   |
| node_116: feature_name=Flu.H1N1.HA1+HA2                    | feature_id[10].value <= threshold=54065.41796875    |
| node_117: feature_name=SARS.CoV.S1.RBD.rFcTag              | feature_id[16].value <= threshold=24639.0           |
| node_118: feature_name=SARS.CoV.2.Spike.RBD.His.Bac        | feature_id[1].value > threshold=23841.4169921875    |
| node_128: feature_name=SARS.CoV.2.S1+S2                    | feature_id[17].value > threshold=41778.25           |
| node_138: feature_name=hCoV.NL63.S1_S2                     | feature_id[13].value > threshold=35816.083984375    |
| node_146: feature_name=a-MoIgG_0.10                        | feature_id[27].value > threshold=3760.5             |
| node_156: feature_name=a-HuIgG_0.03                        | feature_id[7].value > threshold=9740.8330078125     |
| node_158: feature_name=a-HuIgG_0.30                        | feature_id[4].value > threshold=42960.0             |
| node_160: feature_name=hCoV.HKU1.NP                        | feature_id[11].value <= threshold=3927.666748046875 |
| Class: healthcare workers 60–180 days after vaccination    |                                                     |
|                                                            |                                                     |
| Rules_80                                                   | passed counts:3                                     |
| node_0: feature_name=HuIgG_0.10                            | feature_id[2].value > threshold=19120.166015625     |
| node_96: feature_name=a-HuIgG_0.03                         | feature_id[7].value <= threshold=19665.666015625    |
| node_97: feature_name=MERS.CoV.S1.RBD.367.606.rFcTag       | feature_id[5].value <= threshold=3252.625           |

|                                                            |                                                      |
|------------------------------------------------------------|------------------------------------------------------|
| node_98: feature_name=SARS.CoV.2.S2                        | feature_id[29].value <= threshold=9506.32470703125   |
| node_99: feature_name=SARS.CoV.2.S1.RBD.mFc                | feature_id[28].value <= threshold=4672.199844360352  |
| node_100: feature_name=a-MoIgA_0.03                        | feature_id[24].value > threshold=14.999999523162842  |
| node_106: feature_name=HuIgM_0.10                          | feature_id[6].value > threshold=65.66666793823242    |
| node_108: feature_name=SARS.CoV.2.S2                       | feature_id[29].value > threshold=2100.388916015625   |
| Class: healthcare workers within 60 days after vaccination |                                                      |
|                                                            |                                                      |
| Rules_81                                                   | passed counts:3                                      |
| node_0: feature_name=HuIgG_0.10                            | feature_id[2].value <= threshold=19120.166015625     |
| node_1: feature_name=SARS.CoV.2.S1.RBD.mFc                 | feature_id[28].value > threshold=3773.8334350585938  |
| node_9: feature_name=HuIgM_0.03                            | feature_id[14].value > threshold=-88.33333206176758  |
| node_27: feature_name=hCoV.HKU1.S1_S2                      | feature_id[32].value > threshold=42767.0             |
| node_77: feature_name=Flu.B_Mal/.HA1                       | feature_id[9].value <= threshold=41191.69921875      |
| node_78: feature_name=SARS.CoV.2.S1.mFcTag                 | feature_id[21].value <= threshold=41709.720703125    |
| node_79: feature_name=SARS.CoV.S1.HisTag                   | feature_id[18].value <= threshold=3125.4667358398438 |
| Class: unvaccinated healthcare workers                     |                                                      |
|                                                            |                                                      |
| Rules_82                                                   | passed counts:3                                      |
| node_0: feature_name=HuIgG_0.10                            | feature_id[2].value <= threshold=19120.166015625     |
| node_1: feature_name=SARS.CoV.2.S1.RBD.mFc                 | feature_id[28].value > threshold=3773.8334350585938  |
| node_9: feature_name=HuIgM_0.03                            | feature_id[14].value > threshold=-88.33333206176758  |
| node_27: feature_name=hCoV.HKU1.S1_S2                      | feature_id[32].value <= threshold=42767.0            |
| node_28: feature_name=HuIgG_0.03                           | feature_id[0].value > threshold=1005.0               |
| node_38: feature_name=a-HuIgG_0.30                         | feature_id[4].value > threshold=33596.333984375      |
| node_60: feature_name=a-HuIgG_0.03                         | feature_id[7].value <= threshold=10366.5             |

|                                                           |                                                      |
|-----------------------------------------------------------|------------------------------------------------------|
| node_61: feature_name=Flu.H3N2.HA1                        | feature_id[25].value <= threshold=29968.0830078125   |
| node_62: feature_name=HuIgA_0.03                          | feature_id[26].value > threshold=62.33333337306976   |
| Class: healthcare workers over 180 days after vaccination |                                                      |
|                                                           |                                                      |
| Rules_83                                                  | passed counts:3                                      |
| node_0: feature_name=HuIgG_0.10                           | feature_id[2].value <= threshold=19120.166015625     |
| node_1: feature_name=SARS.CoV.2.S1.RBD.mFc                | feature_id[28].value > threshold=3773.8334350585938  |
| node_9: feature_name=HuIgM_0.03                           | feature_id[14].value > threshold=-88.33333206176758  |
| node_27: feature_name=hCoV.HKU1.S1_S2                     | feature_id[32].value <= threshold=42767.0            |
| node_28: feature_name=HuIgG_0.03                          | feature_id[0].value > threshold=1005.0               |
| node_38: feature_name=a-HuIgG_0.30                        | feature_id[4].value > threshold=33596.333984375      |
| node_60: feature_name=a-HuIgG_0.03                        | feature_id[7].value <= threshold=10366.5             |
| node_61: feature_name=Flu.H3N2.HA1                        | feature_id[25].value <= threshold=29968.0830078125   |
| node_62: feature_name=HuIgA_0.03                          | feature_id[26].value <= threshold=62.33333337306976  |
| Class: healthcare workers 60–180 days after vaccination   |                                                      |
|                                                           |                                                      |
| Rules_84                                                  | passed counts:3                                      |
| node_0: feature_name=HuIgG_0.10                           | feature_id[2].value <= threshold=19120.166015625     |
| node_1: feature_name=SARS.CoV.2.S1.RBD.mFc                | feature_id[28].value <= threshold=3773.8334350585938 |
| node_2: feature_name=SARS.CoV.2.S1.RBD.mFc                | feature_id[28].value > threshold=-414.2999954223633  |
| node_4: feature_name=hCoV.OC43.HE                         | feature_id[33].value <= threshold=414.5370330810547  |
| node_5: feature_name=Flu.H1N1.HA1+HA2                     | feature_id[10].value <= threshold=29887.27734375     |
| Class: unvaccinated healthcare workers                    |                                                      |
|                                                           |                                                      |
| Rules_85                                                  | passed counts:2                                      |

|                                                            |                                                      |
|------------------------------------------------------------|------------------------------------------------------|
| node_0: feature_name=HuIgG_0.10                            | feature_id[2].value > threshold=19120.166015625      |
| node_96: feature_name=a-HuIgG_0.03                         | feature_id[7].value > threshold=19665.666015625      |
| node_350: feature_name=HuIgM_0.03                          | feature_id[14].value > threshold=-189.0              |
| node_354: feature_name=HuIgM_0.30                          | feature_id[8].value > threshold=441.8333282470703    |
| node_356: feature_name=a-HuIgG_0.10                        | feature_id[3].value > threshold=32914.5              |
| node_360: feature_name=a-MoIgG_0.03                        | feature_id[12].value > threshold=2414.8333740234375  |
| Class: healthcare workers within 60 days after vaccination |                                                      |
|                                                            |                                                      |
| Rules_86                                                   | passed counts:2                                      |
| node_0: feature_name=HuIgG_0.10                            | feature_id[2].value > threshold=19120.166015625      |
| node_96: feature_name=a-HuIgG_0.03                         | feature_id[7].value > threshold=19665.666015625      |
| node_350: feature_name=HuIgM_0.03                          | feature_id[14].value > threshold=-189.0              |
| node_354: feature_name=HuIgM_0.30                          | feature_id[8].value > threshold=441.8333282470703    |
| node_356: feature_name=a-HuIgG_0.10                        | feature_id[3].value > threshold=32914.5              |
| node_360: feature_name=a-MoIgG_0.03                        | feature_id[12].value <= threshold=2414.8333740234375 |
| node_361: feature_name=HuIgG_0.10                          | feature_id[2].value > threshold=28475.6669921875     |
| Class: healthcare workers 60–180 days after vaccination    |                                                      |
|                                                            |                                                      |
| Rules_87                                                   | passed counts:2                                      |
| node_0: feature_name=HuIgG_0.10                            | feature_id[2].value > threshold=19120.166015625      |
| node_96: feature_name=a-HuIgG_0.03                         | feature_id[7].value > threshold=19665.666015625      |
| node_350: feature_name=HuIgM_0.03                          | feature_id[14].value > threshold=-189.0              |
| node_354: feature_name=HuIgM_0.30                          | feature_id[8].value > threshold=441.8333282470703    |
| node_356: feature_name=a-HuIgG_0.10                        | feature_id[3].value <= threshold=32914.5             |
| node_357: feature_name=MERS.CoV.S1.RBD.367.606.rFcTag      | feature_id[5].value > threshold=6711.89990234375     |

|                                                            |                                                      |
|------------------------------------------------------------|------------------------------------------------------|
| Class: healthcare workers over 180 days after vaccination  |                                                      |
|                                                            |                                                      |
| Rules_88                                                   | passed counts:2                                      |
| node_0: feature_name=HuIgG_0.10                            | feature_id[2].value > threshold=19120.166015625      |
| node_96: feature_name=a-HuIgG_0.03                         | feature_id[7].value <= threshold=19665.666015625     |
| node_97: feature_name=MERS.CoV.S1.RBD.367.606.rFcTag       | feature_id[5].value > threshold=3252.625             |
| node_201: feature_name=SARS.CoV.2.S2                       | feature_id[29].value > threshold=37167.458984375     |
| node_301: feature_name=SARS.CoV.2.S1.mFcTag                | feature_id[21].value > threshold=53322.333984375     |
| node_321: feature_name=a-MoIgA_0.03                        | feature_id[24].value <= threshold=212.0              |
| node_322: feature_name=Flu.H3N2.HA1                        | feature_id[25].value > threshold=37503.517578125     |
| node_330: feature_name=a-MoIgG_0.03                        | feature_id[12].value <= threshold=556.6666564941406  |
| node_331: feature_name=hCoV.229E.S1_S2                     | feature_id[35].value <= threshold=47263.833984375    |
| node_332: feature_name=a-HuIgG_0.10                        | feature_id[3].value > threshold=30393.166015625      |
| node_336: feature_name=hCoV.NL63.S1_S2                     | feature_id[13].value > threshold=53473.16796875      |
| Class: healthcare workers within 60 days after vaccination |                                                      |
|                                                            |                                                      |
| Rules_89                                                   | passed counts:2                                      |
| node_0: feature_name=HuIgG_0.10                            | feature_id[2].value > threshold=19120.166015625      |
| node_96: feature_name=a-HuIgG_0.03                         | feature_id[7].value <= threshold=19665.666015625     |
| node_97: feature_name=MERS.CoV.S1.RBD.367.606.rFcTag       | feature_id[5].value > threshold=3252.625             |
| node_201: feature_name=SARS.CoV.2.S2                       | feature_id[29].value > threshold=37167.458984375     |
| node_301: feature_name=SARS.CoV.2.S1.mFcTag                | feature_id[21].value <= threshold=53322.333984375    |
| node_302: feature_name=MoIgG_0.03                          | feature_id[20].value <= threshold=18.166666507720947 |
| node_303: feature_name=MoIgG_0.30                          | feature_id[34].value <= threshold=7257.166748046875  |
| node_304: feature_name=hCoV.NL63.S1_S2                     | feature_id[13].value > threshold=52607.083984375     |

|                                                            |                                                      |
|------------------------------------------------------------|------------------------------------------------------|
| Class: healthcare workers 60–180 days after vaccination    |                                                      |
|                                                            |                                                      |
| Rules_90                                                   | passed counts:2                                      |
| node_0: feature_name=HuIgG_0.10                            | feature_id[2].value > threshold=19120.166015625      |
| node_96: feature_name=a-HuIgG_0.03                         | feature_id[7].value <= threshold=19665.666015625     |
| node_97: feature_name=MERS.CoV.S1.RBD.367.606.rFcTag       | feature_id[5].value > threshold=3252.625             |
| node_201: feature_name=SARS.CoV.2.S2                       | feature_id[29].value <= threshold=37167.458984375    |
| node_202: feature_name=SARS.CoV.2.Spike.RBD.His.Bac        | feature_id[1].value > threshold=16030.75048828125    |
| node_212: feature_name=a-MoIgA_0.30                        | feature_id[37].value > threshold=1303.0              |
| node_224: feature_name=HuIgA_0.03                          | feature_id[26].value <= threshold=25.83333396911621  |
| node_225: feature_name=Flu.B_Phu/.HA1+HA2                  | feature_id[19].value <= threshold=54802.5            |
| node_226: feature_name=hCoV.HKU1.NP                        | feature_id[11].value <= threshold=13460.3330078125   |
| node_227: feature_name=MoIgG_0.30                          | feature_id[34].value > threshold=3760.5              |
| node_229: feature_name=HuIgM_0.10                          | feature_id[6].value > threshold=-87.16666412353516   |
| node_233: feature_name=a-HuIgG_0.10                        | feature_id[3].value > threshold=27244.3330078125     |
| node_235: feature_name=SARS.CoV.S1.RBD.rFcTag              | feature_id[16].value > threshold=20123.43359375      |
| node_245: feature_name=hCoV.OC43.NP                        | feature_id[23].value > threshold=1775.816650390625   |
| node_253: feature_name=SARS.CoV.S1.RBD.rFcTag              | feature_id[16].value > threshold=21641.4169921875    |
| node_255: feature_name=HuIgA_0.03                          | feature_id[26].value <= threshold=15.333333015441895 |
| node_256: feature_name=Flu.H3N2.HA1                        | feature_id[25].value > threshold=52674.0             |
| Class: healthcare workers within 60 days after vaccination |                                                      |
|                                                            |                                                      |
| Rules_91                                                   | passed counts:2                                      |
| node_0: feature_name=HuIgG_0.10                            | feature_id[2].value > threshold=19120.166015625      |
| node_96: feature_name=a-HuIgG_0.03                         | feature_id[7].value <= threshold=19665.666015625     |

|                                                            |                                                      |
|------------------------------------------------------------|------------------------------------------------------|
| node_97: feature_name=MERS.CoV.S1.RBD.367.606.rFcTag       | feature_id[5].value > threshold=3252.625             |
| node_201: feature_name=SARS.CoV.2.S2                       | feature_id[29].value <= threshold=37167.458984375    |
| node_202: feature_name=SARS.CoV.2.Spike.RBD.His.Bac        | feature_id[1].value > threshold=16030.75048828125    |
| node_212: feature_name=a-MoIgA_0.30                        | feature_id[37].value > threshold=1303.0              |
| node_224: feature_name=HuIgA_0.03                          | feature_id[26].value <= threshold=25.83333396911621  |
| node_225: feature_name=Flu.B_Phu/.HA1+HA2                  | feature_id[19].value <= threshold=54802.5            |
| node_226: feature_name=hCoV.HKU1.NP                        | feature_id[11].value <= threshold=13460.3330078125   |
| node_227: feature_name=MoIgG_0.30                          | feature_id[34].value > threshold=3760.5              |
| node_229: feature_name=HuIgM_0.10                          | feature_id[6].value > threshold=-87.16666412353516   |
| node_233: feature_name=a-HuIgG_0.10                        | feature_id[3].value > threshold=27244.3330078125     |
| node_235: feature_name=SARS.CoV.S1.RBD.rFcTag              | feature_id[16].value > threshold=20123.43359375      |
| node_245: feature_name=hCoV.OC43.NP                        | feature_id[23].value > threshold=1775.816650390625   |
| node_253: feature_name=SARS.CoV.S1.RBD.rFcTag              | feature_id[16].value > threshold=21641.4169921875    |
| node_255: feature_name=HuIgA_0.03                          | feature_id[26].value <= threshold=15.333333015441895 |
| node_256: feature_name=Flu.H3N2.HA1                        | feature_id[25].value <= threshold=52674.0            |
| node_257: feature_name=hCoV.HKU1.S1_S2                     | feature_id[32].value > threshold=37449.416015625     |
| node_261: feature_name=SARS.CoV.2.S1+S2                    | feature_id[17].value <= threshold=42043.224609375    |
| Class: healthcare workers within 60 days after vaccination |                                                      |
|                                                            |                                                      |
| Rules_92                                                   | passed counts:2                                      |
| node_0: feature_name=HuIgG_0.10                            | feature_id[2].value > threshold=19120.166015625      |
| node_96: feature_name=a-HuIgG_0.03                         | feature_id[7].value <= threshold=19665.666015625     |
| node_97: feature_name=MERS.CoV.S1.RBD.367.606.rFcTag       | feature_id[5].value > threshold=3252.625             |
| node_201: feature_name=SARS.CoV.2.S2                       | feature_id[29].value <= threshold=37167.458984375    |
| node_202: feature_name=SARS.CoV.2.Spike.RBD.His.Bac        | feature_id[1].value > threshold=16030.75048828125    |



|                                                           |                                                       |
|-----------------------------------------------------------|-------------------------------------------------------|
| node_212: feature_name=a-MoIgA_0.30                       | feature_id[37].value > threshold=1303.0               |
| node_224: feature_name=HuIgA_0.03                         | feature_id[26].value <= threshold=25.83333396911621   |
| node_225: feature_name=Flu.B_Phu/.HA1+HA2                 | feature_id[19].value <= threshold=54802.5             |
| node_226: feature_name=hCoV.HKU1.NP                       | feature_id[11].value <= threshold=13460.3330078125    |
| node_227: feature_name=MoIgG_0.30                         | feature_id[34].value > threshold=3760.5               |
| node_229: feature_name=HuIgM_0.10                         | feature_id[6].value > threshold=-87.16666412353516    |
| node_233: feature_name=a-HuIgG_0.10                       | feature_id[3].value > threshold=27244.3330078125      |
| node_235: feature_name=SARS.CoV.S1.RBD.rFcTag             | feature_id[16].value > threshold=20123.43359375       |
| node_245: feature_name=hCoV.OC43.NP                       | feature_id[23].value <= threshold=1775.816650390625   |
| node_246: feature_name=HuIgA_0.03                         | feature_id[26].value <= threshold=-10.333333492279053 |
| node_247: feature_name=SARS.CoV.2.S1.RBD.mFc              | feature_id[28].value > threshold=53114.833984375      |
| node_249: feature_name=HuIgG_0.10                         | feature_id[2].value <= threshold=24164.3330078125     |
| Class: healthcare workers over 180 days after vaccination |                                                       |
|                                                           |                                                       |
| Rules_93                                                  | passed counts:2                                       |
| node_0: feature_name=HuIgG_0.10                           | feature_id[2].value > threshold=19120.166015625       |
| node_96: feature_name=a-HuIgG_0.03                        | feature_id[7].value <= threshold=19665.666015625      |
| node_97: feature_name=MERS.CoV.S1.RBD.367.606.rFcTag      | feature_id[5].value > threshold=3252.625              |
| node_201: feature_name=SARS.CoV.2.S2                      | feature_id[29].value <= threshold=37167.458984375     |
| node_202: feature_name=SARS.CoV.2.Spike.RBD.His.Bac       | feature_id[1].value > threshold=16030.75048828125     |
| node_212: feature_name=a-MoIgA_0.30                       | feature_id[37].value <= threshold=1303.0              |
| node_213: feature_name=MERS.CoV.NP                        | feature_id[15].value > threshold=898.7833251953125    |
| node_217: feature_name=hCoV.NL63.S1_S2                    | feature_id[13].value > threshold=30153.3330078125     |
| node_219: feature_name=SARS.CoV.S1.HisTag                 | feature_id[18].value <= threshold=4305.2916259765625  |
| node_220: feature_name=HuIgG_0.30                         | feature_id[36].value <= threshold=36339.833984375     |

|                                                           |                                                     |
|-----------------------------------------------------------|-----------------------------------------------------|
| Class: healthcare workers 60–180 days after vaccination   |                                                     |
|                                                           |                                                     |
| Rules_94                                                  | passed counts:2                                     |
| node_0: feature_name=HuIgG_0.10                           | feature_id[2].value > threshold=19120.166015625     |
| node_96: feature_name=a-HuIgG_0.03                        | feature_id[7].value <= threshold=19665.666015625    |
| node_97: feature_name=MERS.CoV.S1.RBD.367.606.rFcTag      | feature_id[5].value > threshold=3252.625            |
| node_201: feature_name=SARS.CoV.2.S2                      | feature_id[29].value <= threshold=37167.458984375   |
| node_202: feature_name=SARS.CoV.2.Spike.RBD.His.Bac       | feature_id[1].value > threshold=16030.75048828125   |
| node_212: feature_name=a-MoIgA_0.30                       | feature_id[37].value <= threshold=1303.0            |
| node_213: feature_name=MERS.CoV.NP                        | feature_id[15].value > threshold=898.7833251953125  |
| node_217: feature_name=hCoV.NL63.S1_S2                    | feature_id[13].value <= threshold=30153.3330078125  |
| Class: healthcare workers over 180 days after vaccination |                                                     |
|                                                           |                                                     |
| Rules_95                                                  | passed counts:2                                     |
| node_0: feature_name=HuIgG_0.10                           | feature_id[2].value > threshold=19120.166015625     |
| node_96: feature_name=a-HuIgG_0.03                        | feature_id[7].value <= threshold=19665.666015625    |
| node_97: feature_name=MERS.CoV.S1.RBD.367.606.rFcTag      | feature_id[5].value > threshold=3252.625            |
| node_201: feature_name=SARS.CoV.2.S2                      | feature_id[29].value <= threshold=37167.458984375   |
| node_202: feature_name=SARS.CoV.2.Spike.RBD.His.Bac       | feature_id[1].value > threshold=16030.75048828125   |
| node_212: feature_name=a-MoIgA_0.30                       | feature_id[37].value <= threshold=1303.0            |
| node_213: feature_name=MERS.CoV.NP                        | feature_id[15].value <= threshold=898.7833251953125 |
| node_214: feature_name=hCoV.OC43.HE                       | feature_id[33].value > threshold=13271.4169921875   |
| Class: healthcare workers over 180 days after vaccination |                                                     |
|                                                           |                                                     |
| Rules_96                                                  | passed counts:2                                     |

|                                                         |                                                     |
|---------------------------------------------------------|-----------------------------------------------------|
| node_0: feature_name=HuIgG_0.10                         | feature_id[2].value > threshold=19120.166015625     |
| node_96: feature_name=a-HuIgG_0.03                      | feature_id[7].value <= threshold=19665.666015625    |
| node_97: feature_name=MERS.CoV.S1.RBD.367.606.rFcTag    | feature_id[5].value > threshold=3252.625            |
| node_201: feature_name=SARS.CoV.2.S2                    | feature_id[29].value <= threshold=37167.458984375   |
| node_202: feature_name=SARS.CoV.2.Spike.RBD.His.Bac     | feature_id[1].value <= threshold=16030.75048828125  |
| node_203: feature_name=a-MoIgG_0.10                     | feature_id[27].value > threshold=2117.9999389648438 |
| node_207: feature_name=SARS.CoV.S1.HisTag               | feature_id[18].value <= threshold=1072.50830078125  |
| node_208: feature_name=Flu.H3N2.HA1+HA2                 | feature_id[38].value <= threshold=54173.125         |
| Class: unvaccinated healthcare workers                  |                                                     |
|                                                         |                                                     |
| Rules_97                                                | passed counts:2                                     |
| node_0: feature_name=HuIgG_0.10                         | feature_id[2].value > threshold=19120.166015625     |
| node_96: feature_name=a-HuIgG_0.03                      | feature_id[7].value <= threshold=19665.666015625    |
| node_97: feature_name=MERS.CoV.S1.RBD.367.606.rFcTag    | feature_id[5].value <= threshold=3252.625           |
| node_98: feature_name=SARS.CoV.2.S2                     | feature_id[29].value > threshold=9506.32470703125   |
| node_116: feature_name=Flu.H1N1.HA1+HA2                 | feature_id[10].value <= threshold=54065.41796875    |
| node_117: feature_name=SARS.CoV.S1.RBD.rFcTag           | feature_id[16].value > threshold=24639.0            |
| node_167: feature_name=hCoV.OC43.HE                     | feature_id[33].value > threshold=32466.5830078125   |
| Class: healthcare workers 60–180 days after vaccination |                                                     |
|                                                         |                                                     |
| Rules_98                                                | passed counts:2                                     |
| node_0: feature_name=HuIgG_0.10                         | feature_id[2].value > threshold=19120.166015625     |
| node_96: feature_name=a-HuIgG_0.03                      | feature_id[7].value <= threshold=19665.666015625    |
| node_97: feature_name=MERS.CoV.S1.RBD.367.606.rFcTag    | feature_id[5].value <= threshold=3252.625           |
| node_98: feature_name=SARS.CoV.2.S2                     | feature_id[29].value > threshold=9506.32470703125   |

|                                                         |                                                      |
|---------------------------------------------------------|------------------------------------------------------|
| node_116: feature_name=Flu.H1N1.HA1+HA2                 | feature_id[10].value <= threshold=54065.41796875     |
| node_117: feature_name=SARS.CoV.S1.RBD.rFcTag           | feature_id[16].value > threshold=24639.0             |
| node_167: feature_name=hCoV.OC43.HE                     | feature_id[33].value <= threshold=32466.5830078125   |
| node_168: feature_name=HuIgM_0.10                       | feature_id[6].value > threshold=22.833333015441895   |
| node_178: feature_name=a-MoIgA_0.03                     | feature_id[24].value > threshold=-34.333333015441895 |
| node_184: feature_name=HuIgG_0.10                       | feature_id[2].value <= threshold=21401.166015625     |
| node_185: feature_name=SARS.CoV.S1.HisTag               | feature_id[18].value > threshold=7929.375244140625   |
| Class: healthcare workers 60–180 days after vaccination |                                                      |
|                                                         |                                                      |
| Rules_99                                                | passed counts:2                                      |
| node_0: feature_name=HuIgG_0.10                         | feature_id[2].value > threshold=19120.166015625      |
| node_96: feature_name=a-HuIgG_0.03                      | feature_id[7].value <= threshold=19665.666015625     |
| node_97: feature_name=MERS.CoV.S1.RBD.367.606.rFcTag    | feature_id[5].value <= threshold=3252.625            |
| node_98: feature_name=SARS.CoV.2.S2                     | feature_id[29].value > threshold=9506.32470703125    |
| node_116: feature_name=Flu.H1N1.HA1+HA2                 | feature_id[10].value <= threshold=54065.41796875     |
| node_117: feature_name=SARS.CoV.S1.RBD.rFcTag           | feature_id[16].value > threshold=24639.0             |
| node_167: feature_name=hCoV.OC43.HE                     | feature_id[33].value <= threshold=32466.5830078125   |
| node_168: feature_name=HuIgM_0.10                       | feature_id[6].value <= threshold=22.833333015441895  |
| node_169: feature_name=SARS.CoV.2.S1.mFcTag             | feature_id[21].value > threshold=54847.25            |
| node_175: feature_name=SARS.CoV.2.S1.RBD.mFc            | feature_id[28].value <= threshold=49975.58203125     |
| Class: healthcare workers 60–180 days after vaccination |                                                      |
|                                                         |                                                      |
| Rules_100                                               | passed counts:2                                      |
| node_0: feature_name=HuIgG_0.10                         | feature_id[2].value > threshold=19120.166015625      |
| node_96: feature_name=a-HuIgG_0.03                      | feature_id[7].value <= threshold=19665.666015625     |

|                                                         |                                                    |
|---------------------------------------------------------|----------------------------------------------------|
| node_97: feature_name=MERS.CoV.S1.RBD.367.606.rFcTag    | feature_id[5].value <= threshold=3252.625          |
| node_98: feature_name=SARS.CoV.2.S2                     | feature_id[29].value > threshold=9506.32470703125  |
| node_116: feature_name=Flu.H1N1.HA1+HA2                 | feature_id[10].value <= threshold=54065.41796875   |
| node_117: feature_name=SARS.CoV.S1.RBD.rFcTag           | feature_id[16].value <= threshold=24639.0          |
| node_118: feature_name=SARS.CoV.2.Spike.RBD.His.Bac     | feature_id[1].value > threshold=23841.4169921875   |
| node_128: feature_name=SARS.CoV.2.S1+S2                 | feature_id[17].value > threshold=41778.25          |
| node_138: feature_name=hCoV.NL63.S1_S2                  | feature_id[13].value > threshold=35816.083984375   |
| node_146: feature_name=a-MoIgG_0.10                     | feature_id[27].value > threshold=3760.5            |
| node_156: feature_name=a-HuIgG_0.03                     | feature_id[7].value > threshold=9740.8330078125    |
| node_158: feature_name=a-HuIgG_0.30                     | feature_id[4].value > threshold=42960.0            |
| node_160: feature_name=hCoV.HKU1.NP                     | feature_id[11].value > threshold=3927.666748046875 |
| node_162: feature_name=HuIgA_0.03                       | feature_id[26].value > threshold=595.6666870117188 |
| node_164: feature_name=hCoV.HKU1.S1_S2                  | feature_id[32].value <= threshold=49940.333984375  |
| Class: healthcare workers 60–180 days after vaccination |                                                    |
|                                                         |                                                    |
| Rules_101                                               | passed counts:2                                    |
| node_0: feature_name=HuIgG_0.10                         | feature_id[2].value > threshold=19120.166015625    |
| node_96: feature_name=a-HuIgG_0.03                      | feature_id[7].value <= threshold=19665.666015625   |
| node_97: feature_name=MERS.CoV.S1.RBD.367.606.rFcTag    | feature_id[5].value <= threshold=3252.625          |
| node_98: feature_name=SARS.CoV.2.S2                     | feature_id[29].value > threshold=9506.32470703125  |
| node_116: feature_name=Flu.H1N1.HA1+HA2                 | feature_id[10].value <= threshold=54065.41796875   |
| node_117: feature_name=SARS.CoV.S1.RBD.rFcTag           | feature_id[16].value <= threshold=24639.0          |
| node_118: feature_name=SARS.CoV.2.Spike.RBD.His.Bac     | feature_id[1].value > threshold=23841.4169921875   |
| node_128: feature_name=SARS.CoV.2.S1+S2                 | feature_id[17].value > threshold=41778.25          |
| node_138: feature_name=hCoV.NL63.S1_S2                  | feature_id[13].value > threshold=35816.083984375   |

|                                                            |                                                     |
|------------------------------------------------------------|-----------------------------------------------------|
| node_146: feature_name=a-MoIgG_0.10                        | feature_id[27].value > threshold=3760.5             |
| node_156: feature_name=a-HuIgG_0.03                        | feature_id[7].value <= threshold=9740.8330078125    |
| Class: healthcare workers 60–180 days after vaccination    |                                                     |
|                                                            |                                                     |
| Rules_102                                                  | passed counts:2                                     |
| node_0: feature_name=HuIgG_0.10                            | feature_id[2].value > threshold=19120.166015625     |
| node_96: feature_name=a-HuIgG_0.03                         | feature_id[7].value <= threshold=19665.666015625    |
| node_97: feature_name=MERS.CoV.S1.RBD.367.606.rFcTag       | feature_id[5].value <= threshold=3252.625           |
| node_98: feature_name=SARS.CoV.2.S2                        | feature_id[29].value > threshold=9506.32470703125   |
| node_116: feature_name=Flu.H1N1.HA1+HA2                    | feature_id[10].value <= threshold=54065.41796875    |
| node_117: feature_name=SARS.CoV.S1.RBD.rFcTag              | feature_id[16].value <= threshold=24639.0           |
| node_118: feature_name=SARS.CoV.2.Spike.RBD.His.Bac        | feature_id[1].value > threshold=23841.4169921875    |
| node_128: feature_name=SARS.CoV.2.S1+S2                    | feature_id[17].value > threshold=41778.25           |
| node_138: feature_name=hCoV.NL63.S1_S2                     | feature_id[13].value > threshold=35816.083984375    |
| node_146: feature_name=a-MoIgG_0.10                        | feature_id[27].value <= threshold=3760.5            |
| node_147: feature_name=SARS.CoV.S1.HisTag                  | feature_id[18].value > threshold=3759.5833740234375 |
| node_149: feature_name=SARS.CoV.S1.HisTag                  | feature_id[18].value > threshold=4886.25            |
| node_151: feature_name=HuIgM_0.30                          | feature_id[8].value <= threshold=518.0000152587891  |
| node_152: feature_name=a-HuIgG_0.03                        | feature_id[7].value > threshold=10986.3330078125    |
| Class: healthcare workers within 60 days after vaccination |                                                     |
|                                                            |                                                     |
| Rules_103                                                  | passed counts:2                                     |
| node_0: feature_name=HuIgG_0.10                            | feature_id[2].value > threshold=19120.166015625     |
| node_96: feature_name=a-HuIgG_0.03                         | feature_id[7].value <= threshold=19665.666015625    |
| node_97: feature_name=MERS.CoV.S1.RBD.367.606.rFcTag       | feature_id[5].value <= threshold=3252.625           |

|                                                           |                                                     |
|-----------------------------------------------------------|-----------------------------------------------------|
| node_98: feature_name=SARS.CoV.2.S2                       | feature_id[29].value > threshold=9506.32470703125   |
| node_116: feature_name=Flu.H1N1.HA1+HA2                   | feature_id[10].value <= threshold=54065.41796875    |
| node_117: feature_name=SARS.CoV.S1.RBD.rFcTag             | feature_id[16].value <= threshold=24639.0           |
| node_118: feature_name=SARS.CoV.2.Spike.RBD.His.Bac       | feature_id[1].value > threshold=23841.4169921875    |
| node_128: feature_name=SARS.CoV.2.S1+S2                   | feature_id[17].value <= threshold=41778.25          |
| node_129: feature_name=SARS.CoV.S1.HisTag                 | feature_id[18].value > threshold=3569.2833251953125 |
| node_133: feature_name=Flu.B_Mal/.HA1+HA2                 | feature_id[22].value > threshold=47613.583984375    |
| node_135: feature_name=SARS.CoV.2.Spike.RBD.His.Bac       | feature_id[1].value > threshold=27719.5087890625    |
| Class: healthcare workers over 180 days after vaccination |                                                     |
|                                                           |                                                     |
| Rules_104                                                 | passed counts:2                                     |
| node_0: feature_name=HuIgG_0.10                           | feature_id[2].value <= threshold=19120.166015625    |
| node_1: feature_name=SARS.CoV.2.S1.RBD.mFc                | feature_id[28].value > threshold=3773.8334350585938 |
| node_9: feature_name=HuIgM_0.03                           | feature_id[14].value > threshold=-88.33333206176758 |
| node_27: feature_name=hCoV.HKU1.S1_S2                     | feature_id[32].value > threshold=42767.0            |
| node_77: feature_name=Flu.B_Mal/.HA1                      | feature_id[9].value > threshold=41191.69921875      |
| node_91: feature_name=hCoV.NL63.S1_S2                     | feature_id[13].value > threshold=33974.650390625    |
| node_93: feature_name=Flu.H1N1.HA1+HA2                    | feature_id[10].value <= threshold=54167.6015625     |
| Class: healthcare workers 60–180 days after vaccination   |                                                     |
|                                                           |                                                     |
| Rules_105                                                 | passed counts:2                                     |
| node_0: feature_name=HuIgG_0.10                           | feature_id[2].value <= threshold=19120.166015625    |
| node_1: feature_name=SARS.CoV.2.S1.RBD.mFc                | feature_id[28].value > threshold=3773.8334350585938 |
| node_9: feature_name=HuIgM_0.03                           | feature_id[14].value > threshold=-88.33333206176758 |
| node_27: feature_name=hCoV.HKU1.S1_S2                     | feature_id[32].value > threshold=42767.0            |

|                                                           |                                                     |
|-----------------------------------------------------------|-----------------------------------------------------|
| node_77: feature_name=Flu.B_Mal/.HA1                      | feature_id[9].value <= threshold=41191.69921875     |
| node_78: feature_name=SARS.CoV.2.S1.mFcTag                | feature_id[21].value > threshold=41709.720703125    |
| node_82: feature_name=HuIgM_0.10                          | feature_id[6].value > threshold=-43.83333396911621  |
| node_86: feature_name=HuIgG_0.10                          | feature_id[2].value > threshold=18966.0             |
| Class: healthcare workers 60–180 days after vaccination   |                                                     |
|                                                           |                                                     |
| Rules_106                                                 | passed counts:2                                     |
| node_0: feature_name=HuIgG_0.10                           | feature_id[2].value <= threshold=19120.166015625    |
| node_1: feature_name=SARS.CoV.2.S1.RBD.mFc                | feature_id[28].value > threshold=3773.8334350585938 |
| node_9: feature_name=HuIgM_0.03                           | feature_id[14].value > threshold=-88.33333206176758 |
| node_27: feature_name=hCoV.HKU1.S1_S2                     | feature_id[32].value > threshold=42767.0            |
| node_77: feature_name=Flu.B_Mal/.HA1                      | feature_id[9].value <= threshold=41191.69921875     |
| node_78: feature_name=SARS.CoV.2.S1.mFcTag                | feature_id[21].value <= threshold=41709.720703125   |
| node_79: feature_name=SARS.CoV.S1.HisTag                  | feature_id[18].value > threshold=3125.4667358398438 |
| Class: healthcare workers over 180 days after vaccination |                                                     |
|                                                           |                                                     |
| Rules_107                                                 | passed counts:2                                     |
| node_0: feature_name=HuIgG_0.10                           | feature_id[2].value <= threshold=19120.166015625    |
| node_1: feature_name=SARS.CoV.2.S1.RBD.mFc                | feature_id[28].value > threshold=3773.8334350585938 |
| node_9: feature_name=HuIgM_0.03                           | feature_id[14].value > threshold=-88.33333206176758 |
| node_27: feature_name=hCoV.HKU1.S1_S2                     | feature_id[32].value <= threshold=42767.0           |
| node_28: feature_name=HuIgG_0.03                          | feature_id[0].value > threshold=1005.0              |
| node_38: feature_name=a-HuIgG_0.30                        | feature_id[4].value > threshold=33596.333984375     |
| node_60: feature_name=a-HuIgG_0.03                        | feature_id[7].value > threshold=10366.5             |
| node_70: feature_name=hCoV.OC43.HE                        | feature_id[33].value > threshold=23182.7001953125   |



|                                                           |                                                     |
|-----------------------------------------------------------|-----------------------------------------------------|
| Class: healthcare workers over 180 days after vaccination |                                                     |
|                                                           |                                                     |
| Rules_108                                                 | passed counts:2                                     |
| node_0: feature_name=HuIgG_0.10                           | feature_id[2].value <= threshold=19120.166015625    |
| node_1: feature_name=SARS.CoV.2.S1.RBD.mFc                | feature_id[28].value > threshold=3773.8334350585938 |
| node_9: feature_name=HuIgM_0.03                           | feature_id[14].value > threshold=-88.33333206176758 |
| node_27: feature_name=hCoV.HKU1.S1_S2                     | feature_id[32].value <= threshold=42767.0           |
| node_28: feature_name=HuIgG_0.03                          | feature_id[0].value > threshold=1005.0              |
| node_38: feature_name=a-HuIgG_0.30                        | feature_id[4].value <= threshold=33596.333984375    |
| node_39: feature_name=SARS.CoV.S1.HisTag                  | feature_id[18].value > threshold=400.3000030517578  |
| node_43: feature_name=HuIgM_0.10                          | feature_id[6].value > threshold=109.66666793823242  |
| node_57: feature_name=HuIgG_0.30                          | feature_id[36].value > threshold=23562.0            |
| Class: healthcare workers over 180 days after vaccination |                                                     |
|                                                           |                                                     |
| Rules_109                                                 | passed counts:2                                     |
| node_0: feature_name=HuIgG_0.10                           | feature_id[2].value <= threshold=19120.166015625    |
| node_1: feature_name=SARS.CoV.2.S1.RBD.mFc                | feature_id[28].value > threshold=3773.8334350585938 |
| node_9: feature_name=HuIgM_0.03                           | feature_id[14].value > threshold=-88.33333206176758 |
| node_27: feature_name=hCoV.HKU1.S1_S2                     | feature_id[32].value <= threshold=42767.0           |
| node_28: feature_name=HuIgG_0.03                          | feature_id[0].value > threshold=1005.0              |
| node_38: feature_name=a-HuIgG_0.30                        | feature_id[4].value <= threshold=33596.333984375    |
| node_39: feature_name=SARS.CoV.S1.HisTag                  | feature_id[18].value > threshold=400.3000030517578  |
| node_43: feature_name=HuIgM_0.10                          | feature_id[6].value <= threshold=109.66666793823242 |
| node_44: feature_name=MERS.CoV.NP                         | feature_id[15].value > threshold=-50.125            |
| node_46: feature_name=hCoV.229E.S1_S2                     | feature_id[35].value <= threshold=42044.208984375   |

|                                                            |                                                     |
|------------------------------------------------------------|-----------------------------------------------------|
| node_47: feature_name=HuIgM_0.30                           | feature_id[8].value <= threshold=1223.5             |
| node_48: feature_name=SARS.CoV.S1.RBD.rFcTag               | feature_id[16].value > threshold=27979.533203125    |
| node_50: feature_name=Flu.H3N2.HA1+HA2                     | feature_id[38].value <= threshold=39487.333984375   |
| Class: healthcare workers within 60 days after vaccination |                                                     |
|                                                            |                                                     |
| Rules_110                                                  | passed counts:2                                     |
| node_0: feature_name=HuIgG_0.10                            | feature_id[2].value <= threshold=19120.166015625    |
| node_1: feature_name=SARS.CoV.2.S1.RBD.mFc                 | feature_id[28].value > threshold=3773.8334350585938 |
| node_9: feature_name=HuIgM_0.03                            | feature_id[14].value > threshold=-88.33333206176758 |
| node_27: feature_name=hCoV.HKU1.S1_S2                      | feature_id[32].value <= threshold=42767.0           |
| node_28: feature_name=HuIgG_0.03                           | feature_id[0].value > threshold=1005.0              |
| node_38: feature_name=a-HuIgG_0.30                         | feature_id[4].value <= threshold=33596.333984375    |
| node_39: feature_name=SARS.CoV.S1.HisTag                   | feature_id[18].value <= threshold=400.3000030517578 |
| node_40: feature_name=HuIgA_0.03                           | feature_id[26].value <= threshold=448.0             |
| Class: unvaccinated healthcare workers                     |                                                     |
|                                                            |                                                     |
| Rules_111                                                  | passed counts:2                                     |
| node_0: feature_name=HuIgG_0.10                            | feature_id[2].value <= threshold=19120.166015625    |
| node_1: feature_name=SARS.CoV.2.S1.RBD.mFc                 | feature_id[28].value > threshold=3773.8334350585938 |
| node_9: feature_name=HuIgM_0.03                            | feature_id[14].value > threshold=-88.33333206176758 |
| node_27: feature_name=hCoV.HKU1.S1_S2                      | feature_id[32].value <= threshold=42767.0           |
| node_28: feature_name=HuIgG_0.03                           | feature_id[0].value <= threshold=1005.0             |
| node_29: feature_name=SARS.CoV.2.S1.mFcTag                 | feature_id[21].value > threshold=34194.916015625    |
| node_35: feature_name=a-HuIgG_0.10                         | feature_id[3].value > threshold=15372.16650390625   |
| Class: healthcare workers over 180 days after vaccination  |                                                     |

|                                                            |                                                     |
|------------------------------------------------------------|-----------------------------------------------------|
| Rules_112                                                  | passed counts:1                                     |
| node_0: feature_name=HuIgG_0.10                            | feature_id[2].value > threshold=19120.166015625     |
| node_96: feature_name=a-HuIgG_0.03                         | feature_id[7].value > threshold=19665.666015625     |
| node_350: feature_name=HuIgM_0.03                          | feature_id[14].value <= threshold=-189.0            |
| node_351: feature_name=hCoV.OC43.HE                        | feature_id[33].value <= threshold=15191.9169921875  |
| Class: healthcare workers within 60 days after vaccination |                                                     |
| Rules_113                                                  | passed counts:1                                     |
| node_0: feature_name=HuIgG_0.10                            | feature_id[2].value > threshold=19120.166015625     |
| node_96: feature_name=a-HuIgG_0.03                         | feature_id[7].value <= threshold=19665.666015625    |
| node_97: feature_name=MERS.CoV.S1.RBD.367.606.rFcTag       | feature_id[5].value > threshold=3252.625            |
| node_201: feature_name=SARS.CoV.2.S2                       | feature_id[29].value > threshold=37167.458984375    |
| node_301: feature_name=SARS.CoV.2.S1.mFcTag                | feature_id[21].value > threshold=53322.333984375    |
| node_321: feature_name=a-MoIgA_0.03                        | feature_id[24].value <= threshold=212.0             |
| node_322: feature_name=Flu.H3N2.HA1                        | feature_id[25].value > threshold=37503.517578125    |
| node_330: feature_name=a-MoIgG_0.03                        | feature_id[12].value <= threshold=556.6666564941406 |
| node_331: feature_name=hCoV.229E.S1_S2                     | feature_id[35].value <= threshold=47263.833984375   |
| node_332: feature_name=a-HuIgG_0.10                        | feature_id[3].value > threshold=30393.166015625     |
| node_336: feature_name=hCoV.NL63.S1_S2                     | feature_id[13].value <= threshold=53473.16796875    |
| node_337: feature_name=hCoV.HKU1.NP                        | feature_id[11].value > threshold=16009.80029296875  |
| Class: healthcare workers within 60 days after vaccination |                                                     |
| Rules_114                                                  | passed counts:1                                     |
| node_0: feature_name=HuIgG_0.10                            | feature_id[2].value > threshold=19120.166015625     |

|                                                            |                                                     |
|------------------------------------------------------------|-----------------------------------------------------|
| node_96: feature_name=a-HuIgG_0.03                         | feature_id[7].value <= threshold=19665.666015625    |
| node_97: feature_name=MERS.CoV.S1.RBD.367.606.rFcTag       | feature_id[5].value > threshold=3252.625            |
| node_201: feature_name=SARS.CoV.2.S2                       | feature_id[29].value > threshold=37167.458984375    |
| node_301: feature_name=SARS.CoV.2.S1.mFcTag                | feature_id[21].value > threshold=53322.333984375    |
| node_321: feature_name=a-MoIgA_0.03                        | feature_id[24].value <= threshold=212.0             |
| node_322: feature_name=Flu.H3N2.HA1                        | feature_id[25].value > threshold=37503.517578125    |
| node_330: feature_name=a-MoIgG_0.03                        | feature_id[12].value <= threshold=556.6666564941406 |
| node_331: feature_name=hCoV.229E.S1_S2                     | feature_id[35].value <= threshold=47263.833984375   |
| node_332: feature_name=a-HuIgG_0.10                        | feature_id[3].value > threshold=30393.166015625     |
| node_336: feature_name=hCoV.NL63.S1_S2                     | feature_id[13].value <= threshold=53473.16796875    |
| node_337: feature_name=hCoV.HKU1.NP                        | feature_id[11].value <= threshold=16009.80029296875 |
| node_338: feature_name=hCoV.HKU1.S1_S2                     | feature_id[32].value <= threshold=41343.134765625   |
| Class: healthcare workers within 60 days after vaccination |                                                     |
|                                                            |                                                     |
| Rules_115                                                  | passed counts:1                                     |
| node_0: feature_name=HuIgG_0.10                            | feature_id[2].value > threshold=19120.166015625     |
| node_96: feature_name=a-HuIgG_0.03                         | feature_id[7].value <= threshold=19665.666015625    |
| node_97: feature_name=MERS.CoV.S1.RBD.367.606.rFcTag       | feature_id[5].value > threshold=3252.625            |
| node_201: feature_name=SARS.CoV.2.S2                       | feature_id[29].value > threshold=37167.458984375    |
| node_301: feature_name=SARS.CoV.2.S1.mFcTag                | feature_id[21].value > threshold=53322.333984375    |
| node_321: feature_name=a-MoIgA_0.03                        | feature_id[24].value <= threshold=212.0             |
| node_322: feature_name=Flu.H3N2.HA1                        | feature_id[25].value > threshold=37503.517578125    |
| node_330: feature_name=a-MoIgG_0.03                        | feature_id[12].value <= threshold=556.6666564941406 |
| node_331: feature_name=hCoV.229E.S1_S2                     | feature_id[35].value <= threshold=47263.833984375   |
| node_332: feature_name=a-HuIgG_0.10                        | feature_id[3].value <= threshold=30393.166015625    |

|                                                         |                                                     |
|---------------------------------------------------------|-----------------------------------------------------|
| node_333: feature_name=hCoV.OC43.HE                     | feature_id[33].value > threshold=25792.5830078125   |
| Class: healthcare workers 60–180 days after vaccination |                                                     |
|                                                         |                                                     |
| Rules_116                                               | passed counts:1                                     |
| node_0: feature_name=HuIgG_0.10                         | feature_id[2].value > threshold=19120.166015625     |
| node_96: feature_name=a-HuIgG_0.03                      | feature_id[7].value <= threshold=19665.666015625    |
| node_97: feature_name=MERS.CoV.S1.RBD.367.606.rFcTag    | feature_id[5].value > threshold=3252.625            |
| node_201: feature_name=SARS.CoV.2.S2                    | feature_id[29].value > threshold=37167.458984375    |
| node_301: feature_name=SARS.CoV.2.S1.mFcTag             | feature_id[21].value > threshold=53322.333984375    |
| node_321: feature_name=a-MoIgA_0.03                     | feature_id[24].value <= threshold=212.0             |
| node_322: feature_name=Flu.H3N2.HA1                     | feature_id[25].value <= threshold=37503.517578125   |
| node_323: feature_name=hCoV.229E.S1_S2                  | feature_id[35].value <= threshold=29288.533203125   |
| node_324: feature_name=a-MoIgG_0.03                     | feature_id[12].value > threshold=254.83333206176758 |
| node_326: feature_name=Flu.H3N2.HA1                     | feature_id[25].value > threshold=32032.916015625    |
| Class: unvaccinated healthcare workers                  |                                                     |
|                                                         |                                                     |
| Rules_117                                               | passed counts:1                                     |
| node_0: feature_name=HuIgG_0.10                         | feature_id[2].value > threshold=19120.166015625     |
| node_96: feature_name=a-HuIgG_0.03                      | feature_id[7].value <= threshold=19665.666015625    |
| node_97: feature_name=MERS.CoV.S1.RBD.367.606.rFcTag    | feature_id[5].value > threshold=3252.625            |
| node_201: feature_name=SARS.CoV.2.S2                    | feature_id[29].value > threshold=37167.458984375    |
| node_301: feature_name=SARS.CoV.2.S1.mFcTag             | feature_id[21].value > threshold=53322.333984375    |
| node_321: feature_name=a-MoIgA_0.03                     | feature_id[24].value <= threshold=212.0             |
| node_322: feature_name=Flu.H3N2.HA1                     | feature_id[25].value <= threshold=37503.517578125   |
| node_323: feature_name=hCoV.229E.S1_S2                  | feature_id[35].value <= threshold=29288.533203125   |

|                                                           |                                                      |
|-----------------------------------------------------------|------------------------------------------------------|
| node_324: feature_name=a-MoIgG_0.03                       | feature_id[12].value > threshold=254.83333206176758  |
| node_326: feature_name=Flu.H3N2.HA1                       | feature_id[25].value <= threshold=32032.916015625    |
| Class: healthcare workers 60–180 days after vaccination   |                                                      |
|                                                           |                                                      |
| Rules_118                                                 | passed counts:1                                      |
| node_0: feature_name=HuIgG_0.10                           | feature_id[2].value > threshold=19120.166015625      |
| node_96: feature_name=a-HuIgG_0.03                        | feature_id[7].value <= threshold=19665.666015625     |
| node_97: feature_name=MERS.CoV.S1.RBD.367.606.rFcTag      | feature_id[5].value > threshold=3252.625             |
| node_201: feature_name=SARS.CoV.2.S2                      | feature_id[29].value > threshold=37167.458984375     |
| node_301: feature_name=SARS.CoV.2.S1.mFcTag               | feature_id[21].value > threshold=53322.333984375     |
| node_321: feature_name=a-MoIgA_0.03                       | feature_id[24].value <= threshold=212.0              |
| node_322: feature_name=Flu.H3N2.HA1                       | feature_id[25].value <= threshold=37503.517578125    |
| node_323: feature_name=hCoV.229E.S1_S2                    | feature_id[35].value <= threshold=29288.533203125    |
| node_324: feature_name=a-MoIgG_0.03                       | feature_id[12].value <= threshold=254.83333206176758 |
| Class: healthcare workers over 180 days after vaccination |                                                      |
|                                                           |                                                      |
| Rules_119                                                 | passed counts:1                                      |
| node_0: feature_name=HuIgG_0.10                           | feature_id[2].value > threshold=19120.166015625      |
| node_96: feature_name=a-HuIgG_0.03                        | feature_id[7].value <= threshold=19665.666015625     |
| node_97: feature_name=MERS.CoV.S1.RBD.367.606.rFcTag      | feature_id[5].value > threshold=3252.625             |
| node_201: feature_name=SARS.CoV.2.S2                      | feature_id[29].value > threshold=37167.458984375     |
| node_301: feature_name=SARS.CoV.2.S1.mFcTag               | feature_id[21].value <= threshold=53322.333984375    |
| node_302: feature_name=MoIgG_0.03                         | feature_id[20].value > threshold=18.166666507720947  |
| node_318: feature_name=Flu.B_Mal/.HA1+HA2                 | feature_id[22].value > threshold=54334.25            |
| Class: healthcare workers 60–180 days after vaccination   |                                                      |

|                                                           |                                                      |
|-----------------------------------------------------------|------------------------------------------------------|
| Rules_120                                                 | passed counts:1                                      |
| node_0: feature_name=HuIgG_0.10                           | feature_id[2].value > threshold=19120.166015625      |
| node_96: feature_name=a-HuIgG_0.03                        | feature_id[7].value <= threshold=19665.666015625     |
| node_97: feature_name=MERS.CoV.S1.RBD.367.606.rFcTag      | feature_id[5].value > threshold=3252.625             |
| node_201: feature_name=SARS.CoV.2.S2                      | feature_id[29].value > threshold=37167.458984375     |
| node_301: feature_name=SARS.CoV.2.S1.mFcTag               | feature_id[21].value <= threshold=53322.333984375    |
| node_302: feature_name=MoIgG_0.03                         | feature_id[20].value <= threshold=18.166666507720947 |
| node_303: feature_name=MoIgG_0.30                         | feature_id[34].value > threshold=7257.166748046875   |
| node_315: feature_name=Flu.H3N2.HA1+HA2                   | feature_id[38].value <= threshold=52402.140625       |
| Class: healthcare workers over 180 days after vaccination |                                                      |
| Rules_121                                                 | passed counts:1                                      |
| node_0: feature_name=HuIgG_0.10                           | feature_id[2].value > threshold=19120.166015625      |
| node_96: feature_name=a-HuIgG_0.03                        | feature_id[7].value <= threshold=19665.666015625     |
| node_97: feature_name=MERS.CoV.S1.RBD.367.606.rFcTag      | feature_id[5].value > threshold=3252.625             |
| node_201: feature_name=SARS.CoV.2.S2                      | feature_id[29].value > threshold=37167.458984375     |
| node_301: feature_name=SARS.CoV.2.S1.mFcTag               | feature_id[21].value <= threshold=53322.333984375    |
| node_302: feature_name=MoIgG_0.03                         | feature_id[20].value <= threshold=18.166666507720947 |
| node_303: feature_name=MoIgG_0.30                         | feature_id[34].value <= threshold=7257.166748046875  |
| node_304: feature_name=hCoV.NL63.S1_S2                    | feature_id[13].value <= threshold=52607.083984375    |
| node_305: feature_name=HuIgG_0.30                         | feature_id[36].value <= threshold=35912.0            |
| node_306: feature_name=hCoV.229E.S1                       | feature_id[30].value > threshold=31286.6669921875    |
| node_308: feature_name=SARS.CoV.2.S2                      | feature_id[29].value <= threshold=41902.466796875    |
| node_309: feature_name=Flu.B_Mal/.HA1+HA2                 | feature_id[22].value > threshold=39980.466796875     |

|                                                            |                                                      |
|------------------------------------------------------------|------------------------------------------------------|
| Class: unvaccinated healthcare workers                     |                                                      |
|                                                            |                                                      |
| Rules_122                                                  | passed counts:1                                      |
| node_0: feature_name=HuIgG_0.10                            | feature_id[2].value > threshold=19120.166015625      |
| node_96: feature_name=a-HuIgG_0.03                         | feature_id[7].value <= threshold=19665.666015625     |
| node_97: feature_name=MERS.CoV.S1.RBD.367.606.rFcTag       | feature_id[5].value > threshold=3252.625             |
| node_201: feature_name=SARS.CoV.2.S2                       | feature_id[29].value > threshold=37167.458984375     |
| node_301: feature_name=SARS.CoV.2.S1.mFcTag                | feature_id[21].value <= threshold=53322.333984375    |
| node_302: feature_name=MoIgG_0.03                          | feature_id[20].value <= threshold=18.166666507720947 |
| node_303: feature_name=MoIgG_0.30                          | feature_id[34].value <= threshold=7257.166748046875  |
| node_304: feature_name=hCoV.NL63.S1_S2                     | feature_id[13].value <= threshold=52607.083984375    |
| node_305: feature_name=HuIgG_0.30                          | feature_id[36].value <= threshold=35912.0            |
| node_306: feature_name=hCoV.229E.S1                        | feature_id[30].value > threshold=31286.6669921875    |
| node_308: feature_name=SARS.CoV.2.S2                       | feature_id[29].value <= threshold=41902.466796875    |
| node_309: feature_name=Flu.B_Mal/.HA1+HA2                  | feature_id[22].value <= threshold=39980.466796875    |
| Class: healthcare workers within 60 days after vaccination |                                                      |
|                                                            |                                                      |
| Rules_123                                                  | passed counts:1                                      |
| node_0: feature_name=HuIgG_0.10                            | feature_id[2].value > threshold=19120.166015625      |
| node_96: feature_name=a-HuIgG_0.03                         | feature_id[7].value <= threshold=19665.666015625     |
| node_97: feature_name=MERS.CoV.S1.RBD.367.606.rFcTag       | feature_id[5].value > threshold=3252.625             |
| node_201: feature_name=SARS.CoV.2.S2                       | feature_id[29].value <= threshold=37167.458984375    |
| node_202: feature_name=SARS.CoV.2.Spike.RBD.His.Bac        | feature_id[1].value > threshold=16030.75048828125    |
| node_212: feature_name=a-MoIgA_0.30                        | feature_id[37].value > threshold=1303.0              |
| node_224: feature_name=HuIgA_0.03                          | feature_id[26].value > threshold=25.83333396911621   |



|                                                         |                                                       |
|---------------------------------------------------------|-------------------------------------------------------|
| node_276: feature_name=hCoV.OC43.NP                     | feature_id[23].value > threshold=3591.10009765625     |
| node_290: feature_name=SARS.CoV.2.Spike.RBD.His.Bac     | feature_id[1].value > threshold=33649.125             |
| node_296: feature_name=HuIgM_0.03                       | feature_id[14].value <= threshold=-90.5               |
| node_297: feature_name=hCoV.OC43.HE                     | feature_id[33].value > threshold=20650.0830078125     |
| Class: healthcare workers 60–180 days after vaccination |                                                       |
| Rules_124                                               | passed counts:1                                       |
| node_0: feature_name=HuIgG_0.10                         | feature_id[2].value > threshold=19120.166015625       |
| node_96: feature_name=a-HuIgG_0.03                      | feature_id[7].value <= threshold=19665.666015625      |
| node_97: feature_name=MERS.CoV.S1.RBD.367.606.rFcTag    | feature_id[5].value > threshold=3252.625              |
| node_201: feature_name=SARS.CoV.2.S2                    | feature_id[29].value <= threshold=37167.458984375     |
| node_202: feature_name=SARS.CoV.2.Spike.RBD.His.Bac     | feature_id[1].value > threshold=16030.75048828125     |
| node_212: feature_name=a-MoIgA_0.30                     | feature_id[37].value > threshold=1303.0               |
| node_224: feature_name=HuIgA_0.03                       | feature_id[26].value > threshold=25.83333396911621    |
| node_276: feature_name=hCoV.OC43.NP                     | feature_id[23].value > threshold=3591.10009765625     |
| node_290: feature_name=SARS.CoV.2.Spike.RBD.His.Bac     | feature_id[1].value <= threshold=33649.125            |
| node_291: feature_name=SARS.CoV.2.S1.mFcTag             | feature_id[21].value > threshold=49171.599609375      |
| node_293: feature_name=a-MoIgA_0.03                     | feature_id[24].value <= threshold=-139.66666412353516 |
| Class: healthcare workers 60–180 days after vaccination |                                                       |
| Rules_125                                               | passed counts:1                                       |
| node_0: feature_name=HuIgG_0.10                         | feature_id[2].value > threshold=19120.166015625       |
| node_96: feature_name=a-HuIgG_0.03                      | feature_id[7].value <= threshold=19665.666015625      |
| node_97: feature_name=MERS.CoV.S1.RBD.367.606.rFcTag    | feature_id[5].value > threshold=3252.625              |
| node_201: feature_name=SARS.CoV.2.S2                    | feature_id[29].value <= threshold=37167.458984375     |

|                                                            |                                                     |
|------------------------------------------------------------|-----------------------------------------------------|
| node_202: feature_name=SARS.CoV.2.Spike.RBD.His.Bac        | feature_id[1].value > threshold=16030.75048828125   |
| node_212: feature_name=a-MoIgA_0.30                        | feature_id[37].value > threshold=1303.0             |
| node_224: feature_name=HuIgA_0.03                          | feature_id[26].value > threshold=25.83333396911621  |
| node_276: feature_name=hCoV.OC43.NP                        | feature_id[23].value <= threshold=3591.10009765625  |
| node_277: feature_name=hCoV.229E.S1                        | feature_id[30].value > threshold=28616.0            |
| node_287: feature_name=Flu.H3N2.HA1+HA2                    | feature_id[38].value > threshold=55544.548828125    |
| Class: healthcare workers within 60 days after vaccination |                                                     |
|                                                            |                                                     |
| Rules_126                                                  | passed counts:1                                     |
| node_0: feature_name=HuIgG_0.10                            | feature_id[2].value > threshold=19120.166015625     |
| node_96: feature_name=a-HuIgG_0.03                         | feature_id[7].value <= threshold=19665.666015625    |
| node_97: feature_name=MERS.CoV.S1.RBD.367.606.rFcTag       | feature_id[5].value > threshold=3252.625            |
| node_201: feature_name=SARS.CoV.2.S2                       | feature_id[29].value <= threshold=37167.458984375   |
| node_202: feature_name=SARS.CoV.2.Spike.RBD.His.Bac        | feature_id[1].value > threshold=16030.75048828125   |
| node_212: feature_name=a-MoIgA_0.30                        | feature_id[37].value > threshold=1303.0             |
| node_224: feature_name=HuIgA_0.03                          | feature_id[26].value > threshold=25.83333396911621  |
| node_276: feature_name=hCoV.OC43.NP                        | feature_id[23].value <= threshold=3591.10009765625  |
| node_277: feature_name=hCoV.229E.S1                        | feature_id[30].value <= threshold=28616.0           |
| node_278: feature_name=a-MoIgA_0.03                        | feature_id[24].value > threshold=-30.66666603088379 |
| node_282: feature_name=HuIgA_0.03                          | feature_id[26].value <= threshold=965.3333435058594 |
| node_283: feature_name=HuIgG_0.03                          | feature_id[0].value > threshold=7378.66650390625    |
| Class: healthcare workers within 60 days after vaccination |                                                     |
|                                                            |                                                     |
| Rules_127                                                  | passed counts:1                                     |
| node_0: feature_name=HuIgG_0.10                            | feature_id[2].value > threshold=19120.166015625     |

|                                                            |                                                      |
|------------------------------------------------------------|------------------------------------------------------|
| node_96: feature_name=a-HuIgG_0.03                         | feature_id[7].value <= threshold=19665.666015625     |
| node_97: feature_name=MERS.CoV.S1.RBD.367.606.rFcTag       | feature_id[5].value > threshold=3252.625             |
| node_201: feature_name=SARS.CoV.2.S2                       | feature_id[29].value <= threshold=37167.458984375    |
| node_202: feature_name=SARS.CoV.2.Spike.RBD.His.Bac        | feature_id[1].value > threshold=16030.75048828125    |
| node_212: feature_name=a-MoIgA_0.30                        | feature_id[37].value > threshold=1303.0              |
| node_224: feature_name=HuIgA_0.03                          | feature_id[26].value > threshold=25.83333396911621   |
| node_276: feature_name=hCoV.OC43.NP                        | feature_id[23].value <= threshold=3591.10009765625   |
| node_277: feature_name=hCoV.229E.S1                        | feature_id[30].value <= threshold=28616.0            |
| node_278: feature_name=a-MoIgA_0.03                        | feature_id[24].value <= threshold=-30.66666603088379 |
| node_279: feature_name=MERS.CoV.NP                         | feature_id[15].value > threshold=8498.916748046875   |
| Class: healthcare workers 60–180 days after vaccination    |                                                      |
|                                                            |                                                      |
| Rules_128                                                  | passed counts:1                                      |
| node_0: feature_name=HuIgG_0.10                            | feature_id[2].value > threshold=19120.166015625      |
| node_96: feature_name=a-HuIgG_0.03                         | feature_id[7].value <= threshold=19665.666015625     |
| node_97: feature_name=MERS.CoV.S1.RBD.367.606.rFcTag       | feature_id[5].value > threshold=3252.625             |
| node_201: feature_name=SARS.CoV.2.S2                       | feature_id[29].value <= threshold=37167.458984375    |
| node_202: feature_name=SARS.CoV.2.Spike.RBD.His.Bac        | feature_id[1].value > threshold=16030.75048828125    |
| node_212: feature_name=a-MoIgA_0.30                        | feature_id[37].value > threshold=1303.0              |
| node_224: feature_name=HuIgA_0.03                          | feature_id[26].value <= threshold=25.83333396911621  |
| node_225: feature_name=Flu.B_Phu/.HA1+HA2                  | feature_id[19].value > threshold=54802.5             |
| node_273: feature_name=hCoV.HKU1.S1_AA1.760                | feature_id[39].value > threshold=45921.66796875      |
| Class: healthcare workers within 60 days after vaccination |                                                      |
|                                                            |                                                      |
| Rules_129                                                  | passed counts:1                                      |

|                                                         |                                                     |
|---------------------------------------------------------|-----------------------------------------------------|
| node_0: feature_name=HuIgG_0.10                         | feature_id[2].value > threshold=19120.166015625     |
| node_96: feature_name=a-HuIgG_0.03                      | feature_id[7].value <= threshold=19665.666015625    |
| node_97: feature_name=MERS.CoV.S1.RBD.367.606.rFcTag    | feature_id[5].value > threshold=3252.625            |
| node_201: feature_name=SARS.CoV.2.S2                    | feature_id[29].value <= threshold=37167.458984375   |
| node_202: feature_name=SARS.CoV.2.Spike.RBD.His.Bac     | feature_id[1].value > threshold=16030.75048828125   |
| node_212: feature_name=a-MoIgA_0.30                     | feature_id[37].value > threshold=1303.0             |
| node_224: feature_name=HuIgA_0.03                       | feature_id[26].value <= threshold=25.83333396911621 |
| node_225: feature_name=Flu.B_Phu/.HA1+HA2               | feature_id[19].value <= threshold=54802.5           |
| node_226: feature_name=hCoV.HKU1.NP                     | feature_id[11].value > threshold=13460.3330078125   |
| node_270: feature_name=Flu.H3N2.HA1                     | feature_id[25].value <= threshold=35417.583984375   |
| Class: healthcare workers 60–180 days after vaccination |                                                     |
|                                                         |                                                     |
| Rules_130                                               | passed counts:1                                     |
| node_0: feature_name=HuIgG_0.10                         | feature_id[2].value > threshold=19120.166015625     |
| node_96: feature_name=a-HuIgG_0.03                      | feature_id[7].value <= threshold=19665.666015625    |
| node_97: feature_name=MERS.CoV.S1.RBD.367.606.rFcTag    | feature_id[5].value > threshold=3252.625            |
| node_201: feature_name=SARS.CoV.2.S2                    | feature_id[29].value <= threshold=37167.458984375   |
| node_202: feature_name=SARS.CoV.2.Spike.RBD.His.Bac     | feature_id[1].value > threshold=16030.75048828125   |
| node_212: feature_name=a-MoIgA_0.30                     | feature_id[37].value > threshold=1303.0             |
| node_224: feature_name=HuIgA_0.03                       | feature_id[26].value <= threshold=25.83333396911621 |
| node_225: feature_name=Flu.B_Phu/.HA1+HA2               | feature_id[19].value <= threshold=54802.5           |
| node_226: feature_name=hCoV.HKU1.NP                     | feature_id[11].value <= threshold=13460.3330078125  |
| node_227: feature_name=MoIgG_0.30                       | feature_id[34].value > threshold=3760.5             |
| node_229: feature_name=HuIgM_0.10                       | feature_id[6].value > threshold=-87.16666412353516  |
| node_233: feature_name=a-HuIgG_0.10                     | feature_id[3].value > threshold=27244.3330078125    |

|                                                            |                                                      |
|------------------------------------------------------------|------------------------------------------------------|
| node_235: feature_name=SARS.CoV.S1.RBD.rFcTag              | feature_id[16].value > threshold=20123.43359375      |
| node_245: feature_name=hCoV.OC43.NP                        | feature_id[23].value > threshold=1775.816650390625   |
| node_253: feature_name=SARS.CoV.S1.RBD.rFcTag              | feature_id[16].value > threshold=21641.4169921875    |
| node_255: feature_name=HuIgA_0.03                          | feature_id[26].value <= threshold=15.333333015441895 |
| node_256: feature_name=Flu.H3N2.HA1                        | feature_id[25].value <= threshold=52674.0            |
| node_257: feature_name=hCoV.HKU1.S1_S2                     | feature_id[32].value > threshold=37449.416015625     |
| node_261: feature_name=SARS.CoV.2.S1+S2                    | feature_id[17].value > threshold=42043.224609375     |
| node_263: feature_name=Flu.B_Mal/.HA1                      | feature_id[9].value > threshold=50467.166015625      |
| Class: healthcare workers within 60 days after vaccination |                                                      |
|                                                            |                                                      |
| Rules_131                                                  | passed counts:1                                      |
| node_0: feature_name=HuIgG_0.10                            | feature_id[2].value > threshold=19120.166015625      |
| node_96: feature_name=a-HuIgG_0.03                         | feature_id[7].value <= threshold=19665.666015625     |
| node_97: feature_name=MERS.CoV.S1.RBD.367.606.rFcTag       | feature_id[5].value > threshold=3252.625             |
| node_201: feature_name=SARS.CoV.2.S2                       | feature_id[29].value <= threshold=37167.458984375    |
| node_202: feature_name=SARS.CoV.2.Spike.RBD.His.Bac        | feature_id[1].value > threshold=16030.75048828125    |
| node_212: feature_name=a-MoIgA_0.30                        | feature_id[37].value > threshold=1303.0              |
| node_224: feature_name=HuIgA_0.03                          | feature_id[26].value <= threshold=25.83333396911621  |
| node_225: feature_name=Flu.B_Phu/.HA1+HA2                  | feature_id[19].value <= threshold=54802.5            |
| node_226: feature_name=hCoV.HKU1.NP                        | feature_id[11].value <= threshold=13460.3330078125   |
| node_227: feature_name=MoIgG_0.30                          | feature_id[34].value > threshold=3760.5              |
| node_229: feature_name=HuIgM_0.10                          | feature_id[6].value > threshold=-87.16666412353516   |
| node_233: feature_name=a-HuIgG_0.10                        | feature_id[3].value > threshold=27244.3330078125     |
| node_235: feature_name=SARS.CoV.S1.RBD.rFcTag              | feature_id[16].value > threshold=20123.43359375      |
| node_245: feature_name=hCoV.OC43.NP                        | feature_id[23].value > threshold=1775.816650390625   |

|                                                            |                                                      |
|------------------------------------------------------------|------------------------------------------------------|
| node_253: feature_name=SARS.CoV.S1.RBD.rFcTag              | feature_id[16].value > threshold=21641.4169921875    |
| node_255: feature_name=HuIgA_0.03                          | feature_id[26].value <= threshold=15.333333015441895 |
| node_256: feature_name=Flu.H3N2.HA1                        | feature_id[25].value <= threshold=52674.0            |
| node_257: feature_name=hCoV.HKU1.S1_S2                     | feature_id[32].value > threshold=37449.416015625     |
| node_261: feature_name=SARS.CoV.2.S1+S2                    | feature_id[17].value > threshold=42043.224609375     |
| node_263: feature_name=Flu.B_Mal/.HA1                      | feature_id[9].value <= threshold=50467.166015625     |
| node_264: feature_name=hCoV.OC43.HE                        | feature_id[33].value > threshold=29465.6669921875    |
| Class: healthcare workers within 60 days after vaccination |                                                      |
|                                                            |                                                      |
| Rules_132                                                  | passed counts:1                                      |
| node_0: feature_name=HuIgG_0.10                            | feature_id[2].value > threshold=19120.166015625      |
| node_96: feature_name=a-HuIgG_0.03                         | feature_id[7].value <= threshold=19665.666015625     |
| node_97: feature_name=MERS.CoV.S1.RBD.367.606.rFcTag       | feature_id[5].value > threshold=3252.625             |
| node_201: feature_name=SARS.CoV.2.S2                       | feature_id[29].value <= threshold=37167.458984375    |
| node_202: feature_name=SARS.CoV.2.Spike.RBD.His.Bac        | feature_id[1].value > threshold=16030.75048828125    |
| node_212: feature_name=a-MoIgA_0.30                        | feature_id[37].value > threshold=1303.0              |
| node_224: feature_name=HuIgA_0.03                          | feature_id[26].value <= threshold=25.83333396911621  |
| node_225: feature_name=Flu.B_Phu/.HA1+HA2                  | feature_id[19].value <= threshold=54802.5            |
| node_226: feature_name=hCoV.HKU1.NP                        | feature_id[11].value <= threshold=13460.3330078125   |
| node_227: feature_name=MoIgG_0.30                          | feature_id[34].value > threshold=3760.5              |
| node_229: feature_name=HuIgM_0.10                          | feature_id[6].value > threshold=-87.16666412353516   |
| node_233: feature_name=a-HuIgG_0.10                        | feature_id[3].value > threshold=27244.3330078125     |
| node_235: feature_name=SARS.CoV.S1.RBD.rFcTag              | feature_id[16].value > threshold=20123.43359375      |
| node_245: feature_name=hCoV.OC43.NP                        | feature_id[23].value > threshold=1775.816650390625   |
| node_253: feature_name=SARS.CoV.S1.RBD.rFcTag              | feature_id[16].value > threshold=21641.4169921875    |

|                                                         |                                                       |
|---------------------------------------------------------|-------------------------------------------------------|
| node_255: feature_name=HuIgA_0.03                       | feature_id[26].value <= threshold=15.333333015441895  |
| node_256: feature_name=Flu.H3N2.HA1                     | feature_id[25].value <= threshold=52674.0             |
| node_257: feature_name=hCoV.HKU1.S1_S2                  | feature_id[32].value <= threshold=37449.416015625     |
| node_258: feature_name=Flu.B_Mal/.HA1                   | feature_id[9].value <= threshold=27139.75             |
| Class: healthcare workers 60–180 days after vaccination |                                                       |
| Rules_133                                               | passed counts:1                                       |
| node_0: feature_name=HuIgG_0.10                         | feature_id[2].value > threshold=19120.166015625       |
| node_96: feature_name=a-HuIgG_0.03                      | feature_id[7].value <= threshold=19665.666015625      |
| node_97: feature_name=MERS.CoV.S1.RBD.367.606.rFcTag    | feature_id[5].value > threshold=3252.625              |
| node_201: feature_name=SARS.CoV.2.S2                    | feature_id[29].value <= threshold=37167.458984375     |
| node_202: feature_name=SARS.CoV.2.Spike.RBD.His.Bac     | feature_id[1].value > threshold=16030.75048828125     |
| node_212: feature_name=a-MoIgA_0.30                     | feature_id[37].value > threshold=1303.0               |
| node_224: feature_name=HuIgA_0.03                       | feature_id[26].value <= threshold=25.83333396911621   |
| node_225: feature_name=Flu.B_Phu/.HA1+HA2               | feature_id[19].value <= threshold=54802.5             |
| node_226: feature_name=hCoV.HKU1.NP                     | feature_id[11].value <= threshold=13460.3330078125    |
| node_227: feature_name=MoIgG_0.30                       | feature_id[34].value > threshold=3760.5               |
| node_229: feature_name=HuIgM_0.10                       | feature_id[6].value > threshold=-87.16666412353516    |
| node_233: feature_name=a-HuIgG_0.10                     | feature_id[3].value > threshold=27244.3330078125      |
| node_235: feature_name=SARS.CoV.S1.RBD.rFcTag           | feature_id[16].value > threshold=20123.43359375       |
| node_245: feature_name=hCoV.OC43.NP                     | feature_id[23].value <= threshold=1775.816650390625   |
| node_246: feature_name=HuIgA_0.03                       | feature_id[26].value <= threshold=-10.333333492279053 |
| node_247: feature_name=SARS.CoV.2.S1.RBD.mFc            | feature_id[28].value > threshold=53114.833984375      |
| node_249: feature_name=HuIgG_0.10                       | feature_id[2].value > threshold=24164.3330078125      |
| Class: unvaccinated healthcare workers                  |                                                       |

|                                                            |                                                      |
|------------------------------------------------------------|------------------------------------------------------|
| Rules_134                                                  | passed counts:1                                      |
| node_0: feature_name=HuIgG_0.10                            | feature_id[2].value > threshold=19120.166015625      |
| node_96: feature_name=a-HuIgG_0.03                         | feature_id[7].value <= threshold=19665.666015625     |
| node_97: feature_name=MERS.CoV.S1.RBD.367.606.rFcTag       | feature_id[5].value > threshold=3252.625             |
| node_201: feature_name=SARS.CoV.2.S2                       | feature_id[29].value <= threshold=37167.458984375    |
| node_202: feature_name=SARS.CoV.2.Spike.RBD.His.Bac        | feature_id[1].value > threshold=16030.75048828125    |
| node_212: feature_name=a-MoIgA_0.30                        | feature_id[37].value > threshold=1303.0              |
| node_224: feature_name=HuIgA_0.03                          | feature_id[26].value <= threshold=25.83333396911621  |
| node_225: feature_name=Flu.B_Phu/.HA1+HA2                  | feature_id[19].value <= threshold=54802.5            |
| node_226: feature_name=hCoV.HKU1.NP                        | feature_id[11].value <= threshold=13460.3330078125   |
| node_227: feature_name=MoIgG_0.30                          | feature_id[34].value > threshold=3760.5              |
| node_229: feature_name=HuIgM_0.10                          | feature_id[6].value > threshold=-87.16666412353516   |
| node_233: feature_name=a-HuIgG_0.10                        | feature_id[3].value > threshold=27244.3330078125     |
| node_235: feature_name=SARS.CoV.S1.RBD.rFcTag              | feature_id[16].value <= threshold=20123.43359375     |
| node_236: feature_name=MERS.CoV.S1.RBD.367.606.rFcTag      | feature_id[5].value > threshold=4326.625             |
| node_238: feature_name=SARS.CoV.NP                         | feature_id[31].value > threshold=2842.375            |
| node_240: feature_name=Flu.H1N1.HA1+HA2                    | feature_id[10].value <= threshold=53053.666015625    |
| node_241: feature_name=MoIgG_0.03                          | feature_id[20].value <= threshold=-68.16666793823242 |
| Class: healthcare workers within 60 days after vaccination |                                                      |
| Rules_135                                                  | passed counts:1                                      |
| node_0: feature_name=HuIgG_0.10                            | feature_id[2].value > threshold=19120.166015625      |
| node_96: feature_name=a-HuIgG_0.03                         | feature_id[7].value <= threshold=19665.666015625     |
| node_97: feature_name=MERS.CoV.S1.RBD.367.606.rFcTag       | feature_id[5].value > threshold=3252.625             |



|                                                            |                                                      |
|------------------------------------------------------------|------------------------------------------------------|
| node_201: feature_name=SARS.CoV.2.S2                       | feature_id[29].value <= threshold=37167.458984375    |
| node_202: feature_name=SARS.CoV.2.Spike.RBD.His.Bac        | feature_id[1].value > threshold=16030.75048828125    |
| node_212: feature_name=a-MoIgA_0.30                        | feature_id[37].value > threshold=1303.0              |
| node_224: feature_name=HuIgA_0.03                          | feature_id[26].value <= threshold=25.83333396911621  |
| node_225: feature_name=Flu.B_Phu/.HA1+HA2                  | feature_id[19].value <= threshold=54802.5            |
| node_226: feature_name=hCoV.HKU1.NP                        | feature_id[11].value <= threshold=13460.3330078125   |
| node_227: feature_name=MoIgG_0.30                          | feature_id[34].value > threshold=3760.5              |
| node_229: feature_name=HuIgM_0.10                          | feature_id[6].value <= threshold=-87.16666412353516  |
| node_230: feature_name=hCoV.229E.S1                        | feature_id[30].value > threshold=39693.333984375     |
| Class: healthcare workers over 180 days after vaccination  |                                                      |
|                                                            |                                                      |
| Rules_136                                                  | passed counts:1                                      |
| node_0: feature_name=HuIgG_0.10                            | feature_id[2].value > threshold=19120.166015625      |
| node_96: feature_name=a-HuIgG_0.03                         | feature_id[7].value <= threshold=19665.666015625     |
| node_97: feature_name=MERS.CoV.S1.RBD.367.606.rFcTag       | feature_id[5].value > threshold=3252.625             |
| node_201: feature_name=SARS.CoV.2.S2                       | feature_id[29].value <= threshold=37167.458984375    |
| node_202: feature_name=SARS.CoV.2.Spike.RBD.His.Bac        | feature_id[1].value > threshold=16030.75048828125    |
| node_212: feature_name=a-MoIgA_0.30                        | feature_id[37].value <= threshold=1303.0             |
| node_213: feature_name=MERS.CoV.NP                         | feature_id[15].value > threshold=898.7833251953125   |
| node_217: feature_name=hCoV.NL63.S1_S2                     | feature_id[13].value > threshold=30153.3330078125    |
| node_219: feature_name=SARS.CoV.S1.HisTag                  | feature_id[18].value <= threshold=4305.2916259765625 |
| node_220: feature_name=HuIgG_0.30                          | feature_id[36].value > threshold=36339.833984375     |
| Class: healthcare workers within 60 days after vaccination |                                                      |
|                                                            |                                                      |
| Rules_137                                                  | passed counts:1                                      |

|                                                            |                                                      |
|------------------------------------------------------------|------------------------------------------------------|
| node_0: feature_name=HuIgG_0.10                            | feature_id[2].value > threshold=19120.166015625      |
| node_96: feature_name=a-HuIgG_0.03                         | feature_id[7].value <= threshold=19665.666015625     |
| node_97: feature_name=MERS.CoV.S1.RBD.367.606.rFcTag       | feature_id[5].value > threshold=3252.625             |
| node_201: feature_name=SARS.CoV.2.S2                       | feature_id[29].value <= threshold=37167.458984375    |
| node_202: feature_name=SARS.CoV.2.Spike.RBD.His.Bac        | feature_id[1].value <= threshold=16030.75048828125   |
| node_203: feature_name=a-MoIgG_0.10                        | feature_id[27].value > threshold=2117.9999389648438  |
| node_207: feature_name=SARS.CoV.S1.HisTag                  | feature_id[18].value <= threshold=1072.50830078125   |
| node_208: feature_name=Flu.H3N2.HA1+HA2                    | feature_id[38].value > threshold=54173.125           |
| Class: healthcare workers within 60 days after vaccination |                                                      |
|                                                            |                                                      |
| Rules_138                                                  | passed counts:1                                      |
| node_0: feature_name=HuIgG_0.10                            | feature_id[2].value > threshold=19120.166015625      |
| node_96: feature_name=a-HuIgG_0.03                         | feature_id[7].value <= threshold=19665.666015625     |
| node_97: feature_name=MERS.CoV.S1.RBD.367.606.rFcTag       | feature_id[5].value > threshold=3252.625             |
| node_201: feature_name=SARS.CoV.2.S2                       | feature_id[29].value <= threshold=37167.458984375    |
| node_202: feature_name=SARS.CoV.2.Spike.RBD.His.Bac        | feature_id[1].value <= threshold=16030.75048828125   |
| node_203: feature_name=a-MoIgG_0.10                        | feature_id[27].value <= threshold=2117.9999389648438 |
| node_204: feature_name=Flu.H3N2.HA1+HA2                    | feature_id[38].value <= threshold=44847.720703125    |
| Class: healthcare workers 60–180 days after vaccination    |                                                      |
|                                                            |                                                      |
| Rules_139                                                  | passed counts:1                                      |
| node_0: feature_name=HuIgG_0.10                            | feature_id[2].value > threshold=19120.166015625      |
| node_96: feature_name=a-HuIgG_0.03                         | feature_id[7].value <= threshold=19665.666015625     |
| node_97: feature_name=MERS.CoV.S1.RBD.367.606.rFcTag       | feature_id[5].value <= threshold=3252.625            |
| node_98: feature_name=SARS.CoV.2.S2                        | feature_id[29].value > threshold=9506.32470703125    |

|                                                            |                                                      |
|------------------------------------------------------------|------------------------------------------------------|
| node_116: feature_name=Flu.H1N1.HA1+HA2                    | feature_id[10].value > threshold=54065.41796875      |
| node_194: feature_name=MERS.CoV.S1.RBD.367.606.rFcTag      | feature_id[5].value > threshold=2551.3333740234375   |
| node_198: feature_name=HuIgA_0.03                          | feature_id[26].value > threshold=884.3333129882812   |
| Class: healthcare workers within 60 days after vaccination |                                                      |
|                                                            |                                                      |
| Rules_140                                                  | passed counts:1                                      |
| node_0: feature_name=HuIgG_0.10                            | feature_id[2].value > threshold=19120.166015625      |
| node_96: feature_name=a-HuIgG_0.03                         | feature_id[7].value <= threshold=19665.666015625     |
| node_97: feature_name=MERS.CoV.S1.RBD.367.606.rFcTag       | feature_id[5].value <= threshold=3252.625            |
| node_98: feature_name=SARS.CoV.2.S2                        | feature_id[29].value > threshold=9506.32470703125    |
| node_116: feature_name=Flu.H1N1.HA1+HA2                    | feature_id[10].value > threshold=54065.41796875      |
| node_194: feature_name=MERS.CoV.S1.RBD.367.606.rFcTag      | feature_id[5].value <= threshold=2551.3333740234375  |
| node_195: feature_name=a-HuIgG_0.03                        | feature_id[7].value > threshold=17733.50048828125    |
| Class: healthcare workers over 180 days after vaccination  |                                                      |
|                                                            |                                                      |
| Rules_141                                                  | passed counts:1                                      |
| node_0: feature_name=HuIgG_0.10                            | feature_id[2].value > threshold=19120.166015625      |
| node_96: feature_name=a-HuIgG_0.03                         | feature_id[7].value <= threshold=19665.666015625     |
| node_97: feature_name=MERS.CoV.S1.RBD.367.606.rFcTag       | feature_id[5].value <= threshold=3252.625            |
| node_98: feature_name=SARS.CoV.2.S2                        | feature_id[29].value > threshold=9506.32470703125    |
| node_116: feature_name=Flu.H1N1.HA1+HA2                    | feature_id[10].value <= threshold=54065.41796875     |
| node_117: feature_name=SARS.CoV.S1.RBD.rFcTag              | feature_id[16].value > threshold=24639.0             |
| node_167: feature_name=hCoV.OC43.HE                        | feature_id[33].value <= threshold=32466.5830078125   |
| node_168: feature_name=HuIgM_0.10                          | feature_id[6].value > threshold=22.833333015441895   |
| node_178: feature_name=a-MoIgA_0.03                        | feature_id[24].value > threshold=-34.333333015441895 |

|                                                            |                                                      |
|------------------------------------------------------------|------------------------------------------------------|
| node_184: feature_name=HuIgG_0.10                          | feature_id[2].value > threshold=21401.166015625      |
| node_188: feature_name=SARS.CoV.2.S1.mFcTag                | feature_id[21].value <= threshold=51001.0            |
| node_189: feature_name=hCoV.OC43.HE                        | feature_id[33].value > threshold=18835.1337890625    |
| Class: healthcare workers over 180 days after vaccination  |                                                      |
|                                                            |                                                      |
| Rules_142                                                  | passed counts:1                                      |
| node_0: feature_name=HuIgG_0.10                            | feature_id[2].value > threshold=19120.166015625      |
| node_96: feature_name=a-HuIgG_0.03                         | feature_id[7].value <= threshold=19665.666015625     |
| node_97: feature_name=MERS.CoV.S1.RBD.367.606.rFcTag       | feature_id[5].value <= threshold=3252.625            |
| node_98: feature_name=SARS.CoV.2.S2                        | feature_id[29].value > threshold=9506.32470703125    |
| node_116: feature_name=Flu.H1N1.HA1+HA2                    | feature_id[10].value <= threshold=54065.41796875     |
| node_117: feature_name=SARS.CoV.S1.RBD.rFcTag              | feature_id[16].value > threshold=24639.0             |
| node_167: feature_name=hCoV.OC43.HE                        | feature_id[33].value <= threshold=32466.5830078125   |
| node_168: feature_name=HuIgM_0.10                          | feature_id[6].value > threshold=22.833333015441895   |
| node_178: feature_name=a-MoIgA_0.03                        | feature_id[24].value > threshold=-34.333333015441895 |
| node_184: feature_name=HuIgG_0.10                          | feature_id[2].value > threshold=21401.166015625      |
| node_188: feature_name=SARS.CoV.2.S1.mFcTag                | feature_id[21].value <= threshold=51001.0            |
| node_189: feature_name=hCoV.OC43.HE                        | feature_id[33].value <= threshold=18835.1337890625   |
| Class: healthcare workers within 60 days after vaccination |                                                      |
|                                                            |                                                      |
| Rules_143                                                  | passed counts:1                                      |
| node_0: feature_name=HuIgG_0.10                            | feature_id[2].value > threshold=19120.166015625      |
| node_96: feature_name=a-HuIgG_0.03                         | feature_id[7].value <= threshold=19665.666015625     |
| node_97: feature_name=MERS.CoV.S1.RBD.367.606.rFcTag       | feature_id[5].value <= threshold=3252.625            |
| node_98: feature_name=SARS.CoV.2.S2                        | feature_id[29].value > threshold=9506.32470703125    |

|                                                            |                                                       |
|------------------------------------------------------------|-------------------------------------------------------|
| node_116: feature_name=Flu.H1N1.HA1+HA2                    | feature_id[10].value <= threshold=54065.41796875      |
| node_117: feature_name=SARS.CoV.S1.RBD.rFcTag              | feature_id[16].value > threshold=24639.0              |
| node_167: feature_name=hCoV.OC43.HE                        | feature_id[33].value <= threshold=32466.5830078125    |
| node_168: feature_name=HuIgM_0.10                          | feature_id[6].value > threshold=22.833333015441895    |
| node_178: feature_name=a-MoIgA_0.03                        | feature_id[24].value > threshold=-34.333333015441895  |
| node_184: feature_name=HuIgG_0.10                          | feature_id[2].value <= threshold=21401.166015625      |
| node_185: feature_name=SARS.CoV.S1.HisTag                  | feature_id[18].value <= threshold=7929.375244140625   |
| Class: healthcare workers within 60 days after vaccination |                                                       |
|                                                            |                                                       |
| Rules_144                                                  | passed counts:1                                       |
| node_0: feature_name=HuIgG_0.10                            | feature_id[2].value > threshold=19120.166015625       |
| node_96: feature_name=a-HuIgG_0.03                         | feature_id[7].value <= threshold=19665.666015625      |
| node_97: feature_name=MERS.CoV.S1.RBD.367.606.rFcTag       | feature_id[5].value <= threshold=3252.625             |
| node_98: feature_name=SARS.CoV.2.S2                        | feature_id[29].value > threshold=9506.32470703125     |
| node_116: feature_name=Flu.H1N1.HA1+HA2                    | feature_id[10].value <= threshold=54065.41796875      |
| node_117: feature_name=SARS.CoV.S1.RBD.rFcTag              | feature_id[16].value > threshold=24639.0              |
| node_167: feature_name=hCoV.OC43.HE                        | feature_id[33].value <= threshold=32466.5830078125    |
| node_168: feature_name=HuIgM_0.10                          | feature_id[6].value > threshold=22.833333015441895    |
| node_178: feature_name=a-MoIgA_0.03                        | feature_id[24].value <= threshold=-34.333333015441895 |
| node_179: feature_name=Flu.H3N2.HA1+HA2                    | feature_id[38].value <= threshold=54266.91796875      |
| node_180: feature_name=a-HuIgG_0.03                        | feature_id[7].value <= threshold=11043.33349609375    |
| Class: healthcare workers within 60 days after vaccination |                                                       |
|                                                            |                                                       |
| Rules_145                                                  | passed counts:1                                       |
| node_0: feature_name=HuIgG_0.10                            | feature_id[2].value > threshold=19120.166015625       |

|                                                         |                                                      |
|---------------------------------------------------------|------------------------------------------------------|
| node_96: feature_name=a-HuIgG_0.03                      | feature_id[7].value <= threshold=19665.666015625     |
| node_97: feature_name=MERS.CoV.S1.RBD.367.606.rFcTag    | feature_id[5].value <= threshold=3252.625            |
| node_98: feature_name=SARS.CoV.2.S2                     | feature_id[29].value > threshold=9506.32470703125    |
| node_116: feature_name=Flu.H1N1.HA1+HA2                 | feature_id[10].value <= threshold=54065.41796875     |
| node_117: feature_name=SARS.CoV.S1.RBD.rFcTag           | feature_id[16].value > threshold=24639.0             |
| node_167: feature_name=hCoV.OC43.HE                     | feature_id[33].value <= threshold=32466.5830078125   |
| node_168: feature_name=HuIgM_0.10                       | feature_id[6].value <= threshold=22.833333015441895  |
| node_169: feature_name=SARS.CoV.2.S1.mFcTag             | feature_id[21].value <= threshold=54847.25           |
| node_170: feature_name=a-MoIgG_0.03                     | feature_id[12].value > threshold=2342.8333740234375  |
| node_172: feature_name=HuIgM_0.03                       | feature_id[14].value <= threshold=-66.33333206176758 |
| Class: healthcare workers 60–180 days after vaccination |                                                      |
|                                                         |                                                      |
| Rules_146                                               | passed counts:1                                      |
| node_0: feature_name=HuIgG_0.10                         | feature_id[2].value > threshold=19120.166015625      |
| node_96: feature_name=a-HuIgG_0.03                      | feature_id[7].value <= threshold=19665.666015625     |
| node_97: feature_name=MERS.CoV.S1.RBD.367.606.rFcTag    | feature_id[5].value <= threshold=3252.625            |
| node_98: feature_name=SARS.CoV.2.S2                     | feature_id[29].value > threshold=9506.32470703125    |
| node_116: feature_name=Flu.H1N1.HA1+HA2                 | feature_id[10].value <= threshold=54065.41796875     |
| node_117: feature_name=SARS.CoV.S1.RBD.rFcTag           | feature_id[16].value <= threshold=24639.0            |
| node_118: feature_name=SARS.CoV.2.Spike.RBD.His.Bac     | feature_id[1].value > threshold=23841.4169921875     |
| node_128: feature_name=SARS.CoV.2.S1+S2                 | feature_id[17].value > threshold=41778.25            |
| node_138: feature_name=hCoV.NL63.S1_S2                  | feature_id[13].value > threshold=35816.083984375     |
| node_146: feature_name=a-MoIgG_0.10                     | feature_id[27].value > threshold=3760.5              |
| node_156: feature_name=a-HuIgG_0.03                     | feature_id[7].value > threshold=9740.8330078125      |
| node_158: feature_name=a-HuIgG_0.30                     | feature_id[4].value > threshold=42960.0              |

|                                                            |                                                     |
|------------------------------------------------------------|-----------------------------------------------------|
| node_160: feature_name=hCoV.HKU1.NP                        | feature_id[11].value > threshold=3927.666748046875  |
| node_162: feature_name=HuIgA_0.03                          | feature_id[26].value > threshold=595.6666870117188  |
| node_164: feature_name=hCoV.HKU1.S1_S2                     | feature_id[32].value > threshold=49940.333984375    |
| Class: healthcare workers within 60 days after vaccination |                                                     |
|                                                            |                                                     |
| Rules_147                                                  | passed counts:1                                     |
| node_0: feature_name=HuIgG_0.10                            | feature_id[2].value > threshold=19120.166015625     |
| node_96: feature_name=a-HuIgG_0.03                         | feature_id[7].value <= threshold=19665.666015625    |
| node_97: feature_name=MERS.CoV.S1.RBD.367.606.rFcTag       | feature_id[5].value <= threshold=3252.625           |
| node_98: feature_name=SARS.CoV.2.S2                        | feature_id[29].value > threshold=9506.32470703125   |
| node_116: feature_name=Flu.H1N1.HA1+HA2                    | feature_id[10].value <= threshold=54065.41796875    |
| node_117: feature_name=SARS.CoV.S1.RBD.rFcTag              | feature_id[16].value <= threshold=24639.0           |
| node_118: feature_name=SARS.CoV.2.Spike.RBD.His.Bac        | feature_id[1].value > threshold=23841.4169921875    |
| node_128: feature_name=SARS.CoV.2.S1+S2                    | feature_id[17].value > threshold=41778.25           |
| node_138: feature_name=hCoV.NL63.S1_S2                     | feature_id[13].value > threshold=35816.083984375    |
| node_146: feature_name=a-MoIgG_0.10                        | feature_id[27].value <= threshold=3760.5            |
| node_147: feature_name=SARS.CoV.S1.HisTag                  | feature_id[18].value > threshold=3759.5833740234375 |
| node_149: feature_name=SARS.CoV.S1.HisTag                  | feature_id[18].value > threshold=4886.25            |
| node_151: feature_name=HuIgM_0.30                          | feature_id[8].value <= threshold=518.0000152587891  |
| node_152: feature_name=a-HuIgG_0.03                        | feature_id[7].value <= threshold=10986.3330078125   |
| Class: healthcare workers 60–180 days after vaccination    |                                                     |
|                                                            |                                                     |
| Rules_148                                                  | passed counts:1                                     |
| node_0: feature_name=HuIgG_0.10                            | feature_id[2].value > threshold=19120.166015625     |
| node_96: feature_name=a-HuIgG_0.03                         | feature_id[7].value <= threshold=19665.666015625    |

|                                                           |                                                     |
|-----------------------------------------------------------|-----------------------------------------------------|
| node_97: feature_name=MERS.CoV.S1.RBD.367.606.rFcTag      | feature_id[5].value <= threshold=3252.625           |
| node_98: feature_name=SARS.CoV.2.S2                       | feature_id[29].value > threshold=9506.32470703125   |
| node_116: feature_name=Flu.H1N1.HA1+HA2                   | feature_id[10].value <= threshold=54065.41796875    |
| node_117: feature_name=SARS.CoV.S1.RBD.rFcTag             | feature_id[16].value <= threshold=24639.0           |
| node_118: feature_name=SARS.CoV.2.Spike.RBD.His.Bac       | feature_id[1].value > threshold=23841.4169921875    |
| node_128: feature_name=SARS.CoV.2.S1+S2                   | feature_id[17].value > threshold=41778.25           |
| node_138: feature_name=hCoV.NL63.S1_S2                    | feature_id[13].value <= threshold=35816.083984375   |
| node_139: feature_name=Flu.B_Mal/.HA1                     | feature_id[9].value > threshold=46360.66796875      |
| node_143: feature_name=SARS.CoV.S1.RBD.rFcTag             | feature_id[16].value > threshold=16387.74951171875  |
| Class: healthcare workers 60–180 days after vaccination   |                                                     |
|                                                           |                                                     |
| Rules_149                                                 | passed counts:1                                     |
| node_0: feature_name=HuIgG_0.10                           | feature_id[2].value > threshold=19120.166015625     |
| node_96: feature_name=a-HuIgG_0.03                        | feature_id[7].value <= threshold=19665.666015625    |
| node_97: feature_name=MERS.CoV.S1.RBD.367.606.rFcTag      | feature_id[5].value <= threshold=3252.625           |
| node_98: feature_name=SARS.CoV.2.S2                       | feature_id[29].value > threshold=9506.32470703125   |
| node_116: feature_name=Flu.H1N1.HA1+HA2                   | feature_id[10].value <= threshold=54065.41796875    |
| node_117: feature_name=SARS.CoV.S1.RBD.rFcTag             | feature_id[16].value <= threshold=24639.0           |
| node_118: feature_name=SARS.CoV.2.Spike.RBD.His.Bac       | feature_id[1].value > threshold=23841.4169921875    |
| node_128: feature_name=SARS.CoV.2.S1+S2                   | feature_id[17].value > threshold=41778.25           |
| node_138: feature_name=hCoV.NL63.S1_S2                    | feature_id[13].value <= threshold=35816.083984375   |
| node_139: feature_name=Flu.B_Mal/.HA1                     | feature_id[9].value > threshold=46360.66796875      |
| node_143: feature_name=SARS.CoV.S1.RBD.rFcTag             | feature_id[16].value <= threshold=16387.74951171875 |
| Class: healthcare workers over 180 days after vaccination |                                                     |
|                                                           |                                                     |



|                                                         |                                                     |
|---------------------------------------------------------|-----------------------------------------------------|
| Rules_150                                               | passed counts:1                                     |
| node_0: feature_name=HuIgG_0.10                         | feature_id[2].value > threshold=19120.166015625     |
| node_96: feature_name=a-HuIgG_0.03                      | feature_id[7].value <= threshold=19665.666015625    |
| node_97: feature_name=MERS.CoV.S1.RBD.367.606.rFcTag    | feature_id[5].value <= threshold=3252.625           |
| node_98: feature_name=SARS.CoV.2.S2                     | feature_id[29].value > threshold=9506.32470703125   |
| node_116: feature_name=Flu.H1N1.HA1+HA2                 | feature_id[10].value <= threshold=54065.41796875    |
| node_117: feature_name=SARS.CoV.S1.RBD.rFcTag           | feature_id[16].value <= threshold=24639.0           |
| node_118: feature_name=SARS.CoV.2.Spike.RBD.His.Bac     | feature_id[1].value > threshold=23841.4169921875    |
| node_128: feature_name=SARS.CoV.2.S1+S2                 | feature_id[17].value > threshold=41778.25           |
| node_138: feature_name=hCoV.NL63.S1_S2                  | feature_id[13].value <= threshold=35816.083984375   |
| node_139: feature_name=Flu.B_Mal/.HA1                   | feature_id[9].value <= threshold=46360.66796875     |
| node_140: feature_name=MERS.CoV.NP                      | feature_id[15].value <= threshold=809.8333129882812 |
| Class: healthcare workers 60–180 days after vaccination |                                                     |
|                                                         |                                                     |
| Rules_151                                               | passed counts:1                                     |
| node_0: feature_name=HuIgG_0.10                         | feature_id[2].value > threshold=19120.166015625     |
| node_96: feature_name=a-HuIgG_0.03                      | feature_id[7].value <= threshold=19665.666015625    |
| node_97: feature_name=MERS.CoV.S1.RBD.367.606.rFcTag    | feature_id[5].value <= threshold=3252.625           |
| node_98: feature_name=SARS.CoV.2.S2                     | feature_id[29].value > threshold=9506.32470703125   |
| node_116: feature_name=Flu.H1N1.HA1+HA2                 | feature_id[10].value <= threshold=54065.41796875    |
| node_117: feature_name=SARS.CoV.S1.RBD.rFcTag           | feature_id[16].value <= threshold=24639.0           |
| node_118: feature_name=SARS.CoV.2.Spike.RBD.His.Bac     | feature_id[1].value > threshold=23841.4169921875    |
| node_128: feature_name=SARS.CoV.2.S1+S2                 | feature_id[17].value <= threshold=41778.25          |
| node_129: feature_name=SARS.CoV.S1.HisTag               | feature_id[18].value > threshold=3569.2833251953125 |
| node_133: feature_name=Flu.B_Mal/.HA1+HA2               | feature_id[22].value > threshold=47613.583984375    |

|                                                            |                                                      |
|------------------------------------------------------------|------------------------------------------------------|
| node_135: feature_name=SARS.CoV.2.Spike.RBD.His.Bac        | feature_id[1].value <= threshold=27719.5087890625    |
| Class: healthcare workers 60–180 days after vaccination    |                                                      |
|                                                            |                                                      |
| Rules_152                                                  | passed counts:1                                      |
| node_0: feature_name=HuIgG_0.10                            | feature_id[2].value > threshold=19120.166015625      |
| node_96: feature_name=a-HuIgG_0.03                         | feature_id[7].value <= threshold=19665.666015625     |
| node_97: feature_name=MERS.CoV.S1.RBD.367.606.rFcTag       | feature_id[5].value <= threshold=3252.625            |
| node_98: feature_name=SARS.CoV.2.S2                        | feature_id[29].value > threshold=9506.32470703125    |
| node_116: feature_name=Flu.H1N1.HA1+HA2                    | feature_id[10].value <= threshold=54065.41796875     |
| node_117: feature_name=SARS.CoV.S1.RBD.rFcTag              | feature_id[16].value <= threshold=24639.0            |
| node_118: feature_name=SARS.CoV.2.Spike.RBD.His.Bac        | feature_id[1].value > threshold=23841.4169921875     |
| node_128: feature_name=SARS.CoV.2.S1+S2                    | feature_id[17].value <= threshold=41778.25           |
| node_129: feature_name=SARS.CoV.S1.HisTag                  | feature_id[18].value <= threshold=3569.2833251953125 |
| node_130: feature_name=SARS.CoV.2.S2                       | feature_id[29].value > threshold=26478.916015625     |
| Class: healthcare workers within 60 days after vaccination |                                                      |
|                                                            |                                                      |
| Rules_153                                                  | passed counts:1                                      |
| node_0: feature_name=HuIgG_0.10                            | feature_id[2].value > threshold=19120.166015625      |
| node_96: feature_name=a-HuIgG_0.03                         | feature_id[7].value <= threshold=19665.666015625     |
| node_97: feature_name=MERS.CoV.S1.RBD.367.606.rFcTag       | feature_id[5].value <= threshold=3252.625            |
| node_98: feature_name=SARS.CoV.2.S2                        | feature_id[29].value > threshold=9506.32470703125    |
| node_116: feature_name=Flu.H1N1.HA1+HA2                    | feature_id[10].value <= threshold=54065.41796875     |
| node_117: feature_name=SARS.CoV.S1.RBD.rFcTag              | feature_id[16].value <= threshold=24639.0            |
| node_118: feature_name=SARS.CoV.2.Spike.RBD.His.Bac        | feature_id[1].value <= threshold=23841.4169921875    |
| node_119: feature_name=SARS.CoV.2.S2                       | feature_id[29].value > threshold=49775.806640625     |

|                                                         |                                                   |
|---------------------------------------------------------|---------------------------------------------------|
| Class: unvaccinated healthcare workers                  |                                                   |
|                                                         |                                                   |
| Rules_154                                               | passed counts:1                                   |
| node_0: feature_name=HuIgG_0.10                         | feature_id[2].value > threshold=19120.166015625   |
| node_96: feature_name=a-HuIgG_0.03                      | feature_id[7].value <= threshold=19665.666015625  |
| node_97: feature_name=MERS.CoV.S1.RBD.367.606.rFcTag    | feature_id[5].value <= threshold=3252.625         |
| node_98: feature_name=SARS.CoV.2.S2                     | feature_id[29].value > threshold=9506.32470703125 |
| node_116: feature_name=Flu.H1N1.HA1+HA2                 | feature_id[10].value <= threshold=54065.41796875  |
| node_117: feature_name=SARS.CoV.S1.RBD.rFcTag           | feature_id[16].value <= threshold=24639.0         |
| node_118: feature_name=SARS.CoV.2.Spike.RBD.His.Bac     | feature_id[1].value <= threshold=23841.4169921875 |
| node_119: feature_name=SARS.CoV.2.S2                    | feature_id[29].value <= threshold=49775.806640625 |
| node_120: feature_name=MERS.CoV.NP                      | feature_id[15].value > threshold=8014.466796875   |
| Class: healthcare workers 60–180 days after vaccination |                                                   |
|                                                         |                                                   |
| Rules_155                                               | passed counts:1                                   |
| node_0: feature_name=HuIgG_0.10                         | feature_id[2].value > threshold=19120.166015625   |
| node_96: feature_name=a-HuIgG_0.03                      | feature_id[7].value <= threshold=19665.666015625  |
| node_97: feature_name=MERS.CoV.S1.RBD.367.606.rFcTag    | feature_id[5].value <= threshold=3252.625         |
| node_98: feature_name=SARS.CoV.2.S2                     | feature_id[29].value > threshold=9506.32470703125 |
| node_116: feature_name=Flu.H1N1.HA1+HA2                 | feature_id[10].value <= threshold=54065.41796875  |
| node_117: feature_name=SARS.CoV.S1.RBD.rFcTag           | feature_id[16].value <= threshold=24639.0         |
| node_118: feature_name=SARS.CoV.2.Spike.RBD.His.Bac     | feature_id[1].value <= threshold=23841.4169921875 |
| node_119: feature_name=SARS.CoV.2.S2                    | feature_id[29].value <= threshold=49775.806640625 |
| node_120: feature_name=MERS.CoV.NP                      | feature_id[15].value <= threshold=8014.466796875  |
| node_121: feature_name=Flu.H1N1.HA1+HA2                 | feature_id[10].value > threshold=53033.25         |

|                                                            |                                                      |
|------------------------------------------------------------|------------------------------------------------------|
| node_123: feature_name=hCoV.229E.S1_S2                     | feature_id[35].value > threshold=33883.634765625     |
| Class: healthcare workers 60–180 days after vaccination    |                                                      |
|                                                            |                                                      |
| Rules_156                                                  | passed counts:1                                      |
| node_0: feature_name=HuIgG_0.10                            | feature_id[2].value > threshold=19120.166015625      |
| node_96: feature_name=a-HuIgG_0.03                         | feature_id[7].value <= threshold=19665.666015625     |
| node_97: feature_name=MERS.CoV.S1.RBD.367.606.rFcTag       | feature_id[5].value <= threshold=3252.625            |
| node_98: feature_name=SARS.CoV.2.S2                        | feature_id[29].value > threshold=9506.32470703125    |
| node_116: feature_name=Flu.H1N1.HA1+HA2                    | feature_id[10].value <= threshold=54065.41796875     |
| node_117: feature_name=SARS.CoV.S1.RBD.rFcTag              | feature_id[16].value <= threshold=24639.0            |
| node_118: feature_name=SARS.CoV.2.Spike.RBD.His.Bac        | feature_id[1].value <= threshold=23841.4169921875    |
| node_119: feature_name=SARS.CoV.2.S2                       | feature_id[29].value <= threshold=49775.806640625    |
| node_120: feature_name=MERS.CoV.NP                         | feature_id[15].value <= threshold=8014.466796875     |
| node_121: feature_name=Flu.H1N1.HA1+HA2                    | feature_id[10].value > threshold=53033.25            |
| node_123: feature_name=hCoV.229E.S1_S2                     | feature_id[35].value <= threshold=33883.634765625    |
| Class: healthcare workers within 60 days after vaccination |                                                      |
|                                                            |                                                      |
| Rules_157                                                  | passed counts:1                                      |
| node_0: feature_name=HuIgG_0.10                            | feature_id[2].value > threshold=19120.166015625      |
| node_96: feature_name=a-HuIgG_0.03                         | feature_id[7].value <= threshold=19665.666015625     |
| node_97: feature_name=MERS.CoV.S1.RBD.367.606.rFcTag       | feature_id[5].value <= threshold=3252.625            |
| node_98: feature_name=SARS.CoV.2.S2                        | feature_id[29].value <= threshold=9506.32470703125   |
| node_99: feature_name=SARS.CoV.2.S1.RBD.mFc                | feature_id[28].value > threshold=4672.199844360352   |
| node_111: feature_name=HuIgM_0.10                          | feature_id[6].value <= threshold=-30.333333015441895 |
| node_112: feature_name=a-MoIgG_0.10                        | feature_id[27].value > threshold=2261.1666259765625  |

|                                                            |                                                      |
|------------------------------------------------------------|------------------------------------------------------|
| Class: healthcare workers within 60 days after vaccination |                                                      |
|                                                            |                                                      |
| Rules_158                                                  | passed counts:1                                      |
| node_0: feature_name=HuIgG_0.10                            | feature_id[2].value > threshold=19120.166015625      |
| node_96: feature_name=a-HuIgG_0.03                         | feature_id[7].value <= threshold=19665.666015625     |
| node_97: feature_name=MERS.CoV.S1.RBD.367.606.rFcTag       | feature_id[5].value <= threshold=3252.625            |
| node_98: feature_name=SARS.CoV.2.S2                        | feature_id[29].value <= threshold=9506.32470703125   |
| node_99: feature_name=SARS.CoV.2.S1.RBD.mFc                | feature_id[28].value <= threshold=4672.199844360352  |
| node_100: feature_name=a-MoIgA_0.03                        | feature_id[24].value > threshold=14.999999523162842  |
| node_106: feature_name=HuIgM_0.10                          | feature_id[6].value > threshold=65.66666793823242    |
| node_108: feature_name=SARS.CoV.2.S2                       | feature_id[29].value <= threshold=2100.388916015625  |
| Class: unvaccinated healthcare workers                     |                                                      |
|                                                            |                                                      |
| Rules_159                                                  | passed counts:1                                      |
| node_0: feature_name=HuIgG_0.10                            | feature_id[2].value > threshold=19120.166015625      |
| node_96: feature_name=a-HuIgG_0.03                         | feature_id[7].value <= threshold=19665.666015625     |
| node_97: feature_name=MERS.CoV.S1.RBD.367.606.rFcTag       | feature_id[5].value <= threshold=3252.625            |
| node_98: feature_name=SARS.CoV.2.S2                        | feature_id[29].value <= threshold=9506.32470703125   |
| node_99: feature_name=SARS.CoV.2.S1.RBD.mFc                | feature_id[28].value <= threshold=4672.199844360352  |
| node_100: feature_name=a-MoIgA_0.03                        | feature_id[24].value <= threshold=14.999999523162842 |
| node_101: feature_name=a-HuIgG_0.03                        | feature_id[7].value <= threshold=313.1666564941406   |
| node_102: feature_name=MoIgG_0.30                          | feature_id[34].value > threshold=26.999999284744263  |
| Class: healthcare workers over 180 days after vaccination  |                                                      |
|                                                            |                                                      |
| Rules_160                                                  | passed counts:1                                      |

|                                                           |                                                      |
|-----------------------------------------------------------|------------------------------------------------------|
| node_0: feature_name=HuIgG_0.10                           | feature_id[2].value > threshold=19120.166015625      |
| node_96: feature_name=a-HuIgG_0.03                        | feature_id[7].value <= threshold=19665.666015625     |
| node_97: feature_name=MERS.CoV.S1.RBD.367.606.rFcTag      | feature_id[5].value <= threshold=3252.625            |
| node_98: feature_name=SARS.CoV.2.S2                       | feature_id[29].value <= threshold=9506.32470703125   |
| node_99: feature_name=SARS.CoV.2.S1.RBD.mFc               | feature_id[28].value <= threshold=4672.199844360352  |
| node_100: feature_name=a-MoIgA_0.03                       | feature_id[24].value <= threshold=14.999999523162842 |
| node_101: feature_name=a-HuIgG_0.03                       | feature_id[7].value <= threshold=313.1666564941406   |
| node_102: feature_name=MoIgG_0.30                         | feature_id[34].value <= threshold=26.999999284744263 |
| Class: healthcare workers 60–180 days after vaccination   |                                                      |
|                                                           |                                                      |
| Rules_161                                                 | passed counts:1                                      |
| node_0: feature_name=HuIgG_0.10                           | feature_id[2].value <= threshold=19120.166015625     |
| node_1: feature_name=SARS.CoV.2.S1.RBD.mFc                | feature_id[28].value > threshold=3773.8334350585938  |
| node_9: feature_name=HuIgM_0.03                           | feature_id[14].value > threshold=-88.33333206176758  |
| node_27: feature_name=hCoV.HKU1.S1_S2                     | feature_id[32].value > threshold=42767.0             |
| node_77: feature_name=Flu.B_Mal/.HA1                      | feature_id[9].value > threshold=41191.69921875       |
| node_91: feature_name=hCoV.NL63.S1_S2                     | feature_id[13].value > threshold=33974.650390625     |
| node_93: feature_name=Flu.H1N1.HA1+HA2                    | feature_id[10].value > threshold=54167.6015625       |
| Class: healthcare workers over 180 days after vaccination |                                                      |
|                                                           |                                                      |
| Rules_162                                                 | passed counts:1                                      |
| node_0: feature_name=HuIgG_0.10                           | feature_id[2].value <= threshold=19120.166015625     |
| node_1: feature_name=SARS.CoV.2.S1.RBD.mFc                | feature_id[28].value > threshold=3773.8334350585938  |
| node_9: feature_name=HuIgM_0.03                           | feature_id[14].value > threshold=-88.33333206176758  |
| node_27: feature_name=hCoV.HKU1.S1_S2                     | feature_id[32].value > threshold=42767.0             |

|                                                           |                                                     |
|-----------------------------------------------------------|-----------------------------------------------------|
| node_77: feature_name=Flu.B_Mal/.HA1                      | feature_id[9].value <= threshold=41191.69921875     |
| node_78: feature_name=SARS.CoV.2.S1.mFcTag                | feature_id[21].value > threshold=41709.720703125    |
| node_82: feature_name=HuIgM_0.10                          | feature_id[6].value > threshold=-43.83333396911621  |
| node_86: feature_name=HuIgG_0.10                          | feature_id[2].value <= threshold=18966.0            |
| node_87: feature_name=SARS.CoV.2.S2                       | feature_id[29].value <= threshold=22915.0           |
| Class: healthcare workers 60–180 days after vaccination   |                                                     |
|                                                           |                                                     |
| Rules_163                                                 | passed counts:1                                     |
| node_0: feature_name=HuIgG_0.10                           | feature_id[2].value <= threshold=19120.166015625    |
| node_1: feature_name=SARS.CoV.2.S1.RBD.mFc                | feature_id[28].value > threshold=3773.8334350585938 |
| node_9: feature_name=HuIgM_0.03                           | feature_id[14].value > threshold=-88.33333206176758 |
| node_27: feature_name=hCoV.HKU1.S1_S2                     | feature_id[32].value > threshold=42767.0            |
| node_77: feature_name=Flu.B_Mal/.HA1                      | feature_id[9].value <= threshold=41191.69921875     |
| node_78: feature_name=SARS.CoV.2.S1.mFcTag                | feature_id[21].value > threshold=41709.720703125    |
| node_82: feature_name=HuIgM_0.10                          | feature_id[6].value <= threshold=-43.83333396911621 |
| node_83: feature_name=SARS.CoV.S1.HisTag                  | feature_id[18].value <= threshold=8532.783203125    |
| Class: healthcare workers over 180 days after vaccination |                                                     |
|                                                           |                                                     |
| Rules_164                                                 | passed counts:1                                     |
| node_0: feature_name=HuIgG_0.10                           | feature_id[2].value <= threshold=19120.166015625    |
| node_1: feature_name=SARS.CoV.2.S1.RBD.mFc                | feature_id[28].value > threshold=3773.8334350585938 |
| node_9: feature_name=HuIgM_0.03                           | feature_id[14].value > threshold=-88.33333206176758 |
| node_27: feature_name=hCoV.HKU1.S1_S2                     | feature_id[32].value <= threshold=42767.0           |
| node_28: feature_name=HuIgG_0.03                          | feature_id[0].value > threshold=1005.0              |
| node_38: feature_name=a-HuIgG_0.30                        | feature_id[4].value > threshold=33596.333984375     |

|                                                            |                                                     |
|------------------------------------------------------------|-----------------------------------------------------|
| node_60: feature_name=a-HuIgG_0.03                         | feature_id[7].value > threshold=10366.5             |
| node_70: feature_name=hCoV.OC43.HE                         | feature_id[33].value <= threshold=23182.7001953125  |
| node_71: feature_name=SARS.CoV.2.Spike.RBD.His.Bac         | feature_id[1].value > threshold=48979.25            |
| Class: healthcare workers over 180 days after vaccination  |                                                     |
|                                                            |                                                     |
| Rules_165                                                  | passed counts:1                                     |
| node_0: feature_name=HuIgG_0.10                            | feature_id[2].value <= threshold=19120.166015625    |
| node_1: feature_name=SARS.CoV.2.S1.RBD.mFc                 | feature_id[28].value > threshold=3773.8334350585938 |
| node_9: feature_name=HuIgM_0.03                            | feature_id[14].value > threshold=-88.33333206176758 |
| node_27: feature_name=hCoV.HKU1.S1_S2                      | feature_id[32].value <= threshold=42767.0           |
| node_28: feature_name=HuIgG_0.03                           | feature_id[0].value > threshold=1005.0              |
| node_38: feature_name=a-HuIgG_0.30                         | feature_id[4].value > threshold=33596.333984375     |
| node_60: feature_name=a-HuIgG_0.03                         | feature_id[7].value > threshold=10366.5             |
| node_70: feature_name=hCoV.OC43.HE                         | feature_id[33].value <= threshold=23182.7001953125  |
| node_71: feature_name=SARS.CoV.2.Spike.RBD.His.Bac         | feature_id[1].value <= threshold=48979.25           |
| node_72: feature_name=HuIgM_0.10                           | feature_id[6].value > threshold=40.166666984558105  |
| Class: healthcare workers within 60 days after vaccination |                                                     |
|                                                            |                                                     |
| Rules_166                                                  | passed counts:1                                     |
| node_0: feature_name=HuIgG_0.10                            | feature_id[2].value <= threshold=19120.166015625    |
| node_1: feature_name=SARS.CoV.2.S1.RBD.mFc                 | feature_id[28].value > threshold=3773.8334350585938 |
| node_9: feature_name=HuIgM_0.03                            | feature_id[14].value > threshold=-88.33333206176758 |
| node_27: feature_name=hCoV.HKU1.S1_S2                      | feature_id[32].value <= threshold=42767.0           |
| node_28: feature_name=HuIgG_0.03                           | feature_id[0].value > threshold=1005.0              |
| node_38: feature_name=a-HuIgG_0.30                         | feature_id[4].value > threshold=33596.333984375     |



|                                                           |                                                     |
|-----------------------------------------------------------|-----------------------------------------------------|
| node_60: feature_name=a-HuIgG_0.03                        | feature_id[7].value <= threshold=10366.5            |
| node_61: feature_name=Flu.H3N2.HA1                        | feature_id[25].value > threshold=29968.0830078125   |
| node_65: feature_name=HuIgG_0.30                          | feature_id[36].value > threshold=36026.0            |
| node_67: feature_name=HuIgM_0.10                          | feature_id[6].value > threshold=47.500000953674316  |
| Class: healthcare workers over 180 days after vaccination |                                                     |
|                                                           |                                                     |
| Rules_167                                                 | passed counts:1                                     |
| node_0: feature_name=HuIgG_0.10                           | feature_id[2].value <= threshold=19120.166015625    |
| node_1: feature_name=SARS.CoV.2.S1.RBD.mFc                | feature_id[28].value > threshold=3773.8334350585938 |
| node_9: feature_name=HuIgM_0.03                           | feature_id[14].value > threshold=-88.33333206176758 |
| node_27: feature_name=hCoV.HKU1.S1_S2                     | feature_id[32].value <= threshold=42767.0           |
| node_28: feature_name=HuIgG_0.03                          | feature_id[0].value > threshold=1005.0              |
| node_38: feature_name=a-HuIgG_0.30                        | feature_id[4].value > threshold=33596.333984375     |
| node_60: feature_name=a-HuIgG_0.03                        | feature_id[7].value <= threshold=10366.5            |
| node_61: feature_name=Flu.H3N2.HA1                        | feature_id[25].value > threshold=29968.0830078125   |
| node_65: feature_name=HuIgG_0.30                          | feature_id[36].value > threshold=36026.0            |
| node_67: feature_name=HuIgM_0.10                          | feature_id[6].value <= threshold=47.500000953674316 |
| Class: healthcare workers 60–180 days after vaccination   |                                                     |
|                                                           |                                                     |
| Rules_168                                                 | passed counts:1                                     |
| node_0: feature_name=HuIgG_0.10                           | feature_id[2].value <= threshold=19120.166015625    |
| node_1: feature_name=SARS.CoV.2.S1.RBD.mFc                | feature_id[28].value > threshold=3773.8334350585938 |
| node_9: feature_name=HuIgM_0.03                           | feature_id[14].value > threshold=-88.33333206176758 |
| node_27: feature_name=hCoV.HKU1.S1_S2                     | feature_id[32].value <= threshold=42767.0           |
| node_28: feature_name=HuIgG_0.03                          | feature_id[0].value > threshold=1005.0              |

|                                                           |                                                     |
|-----------------------------------------------------------|-----------------------------------------------------|
| node_38: feature_name=a-HuIgG_0.30                        | feature_id[4].value <= threshold=33596.333984375    |
| node_39: feature_name=SARS.CoV.S1.HisTag                  | feature_id[18].value > threshold=400.3000030517578  |
| node_43: feature_name=HuIgM_0.10                          | feature_id[6].value > threshold=109.66666793823242  |
| node_57: feature_name=HuIgG_0.30                          | feature_id[36].value <= threshold=23562.0           |
| Class: healthcare workers 60–180 days after vaccination   |                                                     |
|                                                           |                                                     |
| Rules_169                                                 | passed counts:1                                     |
| node_0: feature_name=HuIgG_0.10                           | feature_id[2].value <= threshold=19120.166015625    |
| node_1: feature_name=SARS.CoV.2.S1.RBD.mFc                | feature_id[28].value > threshold=3773.8334350585938 |
| node_9: feature_name=HuIgM_0.03                           | feature_id[14].value > threshold=-88.33333206176758 |
| node_27: feature_name=hCoV.HKU1.S1_S2                     | feature_id[32].value <= threshold=42767.0           |
| node_28: feature_name=HuIgG_0.03                          | feature_id[0].value > threshold=1005.0              |
| node_38: feature_name=a-HuIgG_0.30                        | feature_id[4].value <= threshold=33596.333984375    |
| node_39: feature_name=SARS.CoV.S1.HisTag                  | feature_id[18].value > threshold=400.3000030517578  |
| node_43: feature_name=HuIgM_0.10                          | feature_id[6].value <= threshold=109.66666793823242 |
| node_44: feature_name=MERS.CoV.NP                         | feature_id[15].value > threshold=-50.125            |
| node_46: feature_name=hCoV.229E.S1_S2                     | feature_id[35].value > threshold=42044.208984375    |
| Class: healthcare workers over 180 days after vaccination |                                                     |
|                                                           |                                                     |
| Rules_170                                                 | passed counts:1                                     |
| node_0: feature_name=HuIgG_0.10                           | feature_id[2].value <= threshold=19120.166015625    |
| node_1: feature_name=SARS.CoV.2.S1.RBD.mFc                | feature_id[28].value > threshold=3773.8334350585938 |
| node_9: feature_name=HuIgM_0.03                           | feature_id[14].value > threshold=-88.33333206176758 |
| node_27: feature_name=hCoV.HKU1.S1_S2                     | feature_id[32].value <= threshold=42767.0           |
| node_28: feature_name=HuIgG_0.03                          | feature_id[0].value > threshold=1005.0              |

|                                                            |                                                      |
|------------------------------------------------------------|------------------------------------------------------|
| node_38: feature_name=a-HuIgG_0.30                         | feature_id[4].value <= threshold=33596.333984375     |
| node_39: feature_name=SARS.CoV.S1.HisTag                   | feature_id[18].value > threshold=400.3000030517578   |
| node_43: feature_name=HuIgM_0.10                           | feature_id[6].value <= threshold=109.66666793823242  |
| node_44: feature_name=MERS.CoV.NP                          | feature_id[15].value > threshold=-50.125             |
| node_46: feature_name=hCoV.229E.S1_S2                      | feature_id[35].value <= threshold=42044.208984375    |
| node_47: feature_name=HuIgM_0.30                           | feature_id[8].value > threshold=1223.5               |
| node_53: feature_name=hCoV.HKU1.S1_AA1.760                 | feature_id[39].value > threshold=11187.500366210938  |
| Class: healthcare workers 60–180 days after vaccination    |                                                      |
|                                                            |                                                      |
| Rules_171                                                  | passed counts:1                                      |
| node_0: feature_name=HuIgG_0.10                            | feature_id[2].value <= threshold=19120.166015625     |
| node_1: feature_name=SARS.CoV.2.S1.RBD.mFc                 | feature_id[28].value > threshold=3773.8334350585938  |
| node_9: feature_name=HuIgM_0.03                            | feature_id[14].value > threshold=-88.33333206176758  |
| node_27: feature_name=hCoV.HKU1.S1_S2                      | feature_id[32].value <= threshold=42767.0            |
| node_28: feature_name=HuIgG_0.03                           | feature_id[0].value > threshold=1005.0               |
| node_38: feature_name=a-HuIgG_0.30                         | feature_id[4].value <= threshold=33596.333984375     |
| node_39: feature_name=SARS.CoV.S1.HisTag                   | feature_id[18].value > threshold=400.3000030517578   |
| node_43: feature_name=HuIgM_0.10                           | feature_id[6].value <= threshold=109.66666793823242  |
| node_44: feature_name=MERS.CoV.NP                          | feature_id[15].value > threshold=-50.125             |
| node_46: feature_name=hCoV.229E.S1_S2                      | feature_id[35].value <= threshold=42044.208984375    |
| node_47: feature_name=HuIgM_0.30                           | feature_id[8].value > threshold=1223.5               |
| node_53: feature_name=hCoV.HKU1.S1_AA1.760                 | feature_id[39].value <= threshold=11187.500366210938 |
| Class: healthcare workers within 60 days after vaccination |                                                      |
|                                                            |                                                      |
| Rules_172                                                  | passed counts:1                                      |

|                                                           |                                                     |
|-----------------------------------------------------------|-----------------------------------------------------|
| node_0: feature_name=HuIgG_0.10                           | feature_id[2].value <= threshold=19120.166015625    |
| node_1: feature_name=SARS.CoV.2.S1.RBD.mFc                | feature_id[28].value > threshold=3773.8334350585938 |
| node_9: feature_name=HuIgM_0.03                           | feature_id[14].value > threshold=-88.33333206176758 |
| node_27: feature_name=hCoV.HKU1.S1_S2                     | feature_id[32].value <= threshold=42767.0           |
| node_28: feature_name=HuIgG_0.03                          | feature_id[0].value > threshold=1005.0              |
| node_38: feature_name=a-HuIgG_0.30                        | feature_id[4].value <= threshold=33596.333984375    |
| node_39: feature_name=SARS.CoV.S1.HisTag                  | feature_id[18].value > threshold=400.3000030517578  |
| node_43: feature_name=HuIgM_0.10                          | feature_id[6].value <= threshold=109.66666793823242 |
| node_44: feature_name=MERS.CoV.NP                         | feature_id[15].value <= threshold=-50.125           |
| Class: healthcare workers over 180 days after vaccination |                                                     |
|                                                           |                                                     |
| Rules_173                                                 | passed counts:1                                     |
| node_0: feature_name=HuIgG_0.10                           | feature_id[2].value <= threshold=19120.166015625    |
| node_1: feature_name=SARS.CoV.2.S1.RBD.mFc                | feature_id[28].value > threshold=3773.8334350585938 |
| node_9: feature_name=HuIgM_0.03                           | feature_id[14].value > threshold=-88.33333206176758 |
| node_27: feature_name=hCoV.HKU1.S1_S2                     | feature_id[32].value <= threshold=42767.0           |
| node_28: feature_name=HuIgG_0.03                          | feature_id[0].value > threshold=1005.0              |
| node_38: feature_name=a-HuIgG_0.30                        | feature_id[4].value <= threshold=33596.333984375    |
| node_39: feature_name=SARS.CoV.S1.HisTag                  | feature_id[18].value <= threshold=400.3000030517578 |
| node_40: feature_name=HuIgA_0.03                          | feature_id[26].value > threshold=448.0              |
| Class: healthcare workers 60–180 days after vaccination   |                                                     |
|                                                           |                                                     |
| Rules_174                                                 | passed counts:1                                     |
| node_0: feature_name=HuIgG_0.10                           | feature_id[2].value <= threshold=19120.166015625    |
| node_1: feature_name=SARS.CoV.2.S1.RBD.mFc                | feature_id[28].value > threshold=3773.8334350585938 |

|                                                           |                                                       |
|-----------------------------------------------------------|-------------------------------------------------------|
| node_9: feature_name=HuIgM_0.03                           | feature_id[14].value > threshold=-88.33333206176758   |
| node_27: feature_name=hCoV.HKU1.S1_S2                     | feature_id[32].value <= threshold=42767.0             |
| node_28: feature_name=HuIgG_0.03                          | feature_id[0].value <= threshold=1005.0               |
| node_29: feature_name=SARS.CoV.2.S1.mFcTag                | feature_id[21].value <= threshold=34194.916015625     |
| node_30: feature_name=SARS.CoV.2.S2                       | feature_id[29].value > threshold=7509.916748046875    |
| node_32: feature_name=MoIgG_0.03                          | feature_id[20].value > threshold=-249.83333349227905  |
| Class: healthcare workers 60–180 days after vaccination   |                                                       |
|                                                           |                                                       |
| Rules_175                                                 | passed counts:1                                       |
| node_0: feature_name=HuIgG_0.10                           | feature_id[2].value <= threshold=19120.166015625      |
| node_1: feature_name=SARS.CoV.2.S1.RBD.mFc                | feature_id[28].value > threshold=3773.8334350585938   |
| node_9: feature_name=HuIgM_0.03                           | feature_id[14].value > threshold=-88.33333206176758   |
| node_27: feature_name=hCoV.HKU1.S1_S2                     | feature_id[32].value <= threshold=42767.0             |
| node_28: feature_name=HuIgG_0.03                          | feature_id[0].value <= threshold=1005.0               |
| node_29: feature_name=SARS.CoV.2.S1.mFcTag                | feature_id[21].value <= threshold=34194.916015625     |
| node_30: feature_name=SARS.CoV.2.S2                       | feature_id[29].value > threshold=7509.916748046875    |
| node_32: feature_name=MoIgG_0.03                          | feature_id[20].value <= threshold=-249.83333349227905 |
| Class: healthcare workers over 180 days after vaccination |                                                       |
|                                                           |                                                       |
| Rules_176                                                 | passed counts:1                                       |
| node_0: feature_name=HuIgG_0.10                           | feature_id[2].value <= threshold=19120.166015625      |
| node_1: feature_name=SARS.CoV.2.S1.RBD.mFc                | feature_id[28].value > threshold=3773.8334350585938   |
| node_9: feature_name=HuIgM_0.03                           | feature_id[14].value <= threshold=-88.33333206176758  |
| node_10: feature_name=HuIgA_0.03                          | feature_id[26].value <= threshold=304.5               |
| node_11: feature_name=Flu.H1N1.HA1+HA2                    | feature_id[10].value > threshold=53444.666015625      |

|                                                            |                                                      |
|------------------------------------------------------------|------------------------------------------------------|
| node_19: feature_name=a-MoIgA_0.03                         | feature_id[24].value > threshold=-97.16666793823242  |
| node_21: feature_name=a-MoIgA_0.03                         | feature_id[24].value > threshold=0.6666666269302368  |
| node_23: feature_name=Flu.H3N2.HA1                         | feature_id[25].value > threshold=26045.533203125     |
| Class: healthcare workers within 60 days after vaccination |                                                      |
|                                                            |                                                      |
| Rules_177                                                  | passed counts:1                                      |
| node_0: feature_name=HuIgG_0.10                            | feature_id[2].value <= threshold=19120.166015625     |
| node_1: feature_name=SARS.CoV.2.S1.RBD.mFc                 | feature_id[28].value > threshold=3773.8334350585938  |
| node_9: feature_name=HuIgM_0.03                            | feature_id[14].value <= threshold=-88.33333206176758 |
| node_10: feature_name=HuIgA_0.03                           | feature_id[26].value <= threshold=304.5              |
| node_11: feature_name=Flu.H1N1.HA1+HA2                     | feature_id[10].value > threshold=53444.666015625     |
| node_19: feature_name=a-MoIgA_0.03                         | feature_id[24].value > threshold=-97.16666793823242  |
| node_21: feature_name=a-MoIgA_0.03                         | feature_id[24].value > threshold=0.6666666269302368  |
| node_23: feature_name=Flu.H3N2.HA1                         | feature_id[25].value <= threshold=26045.533203125    |
| Class: healthcare workers 60–180 days after vaccination    |                                                      |
|                                                            |                                                      |
| Rules_178                                                  | passed counts:1                                      |
| node_0: feature_name=HuIgG_0.10                            | feature_id[2].value <= threshold=19120.166015625     |
| node_1: feature_name=SARS.CoV.2.S1.RBD.mFc                 | feature_id[28].value > threshold=3773.8334350585938  |
| node_9: feature_name=HuIgM_0.03                            | feature_id[14].value <= threshold=-88.33333206176758 |
| node_10: feature_name=HuIgA_0.03                           | feature_id[26].value <= threshold=304.5              |
| node_11: feature_name=Flu.H1N1.HA1+HA2                     | feature_id[10].value <= threshold=53444.666015625    |
| node_12: feature_name=MERS.CoV.S1.RBD.367.606.rFcTag       | feature_id[5].value > threshold=-2425.0              |
| node_14: feature_name=Flu.B_Mal/.HA1+HA2                   | feature_id[22].value > threshold=53898.0             |
| node_16: feature_name=hCoV.OC43.HE                         | feature_id[33].value > threshold=18505.49951171875   |

|                                                           |                                                      |
|-----------------------------------------------------------|------------------------------------------------------|
| Class: healthcare workers 60–180 days after vaccination   |                                                      |
|                                                           |                                                      |
| Rules_179                                                 | passed counts:1                                      |
| node_0: feature_name=HuIgG_0.10                           | feature_id[2].value <= threshold=19120.166015625     |
| node_1: feature_name=SARS.CoV.2.S1.RBD.mFc                | feature_id[28].value > threshold=3773.8334350585938  |
| node_9: feature_name=HuIgM_0.03                           | feature_id[14].value <= threshold=-88.33333206176758 |
| node_10: feature_name=HuIgA_0.03                          | feature_id[26].value <= threshold=304.5              |
| node_11: feature_name=Flu.H1N1.HA1+HA2                    | feature_id[10].value <= threshold=53444.666015625    |
| node_12: feature_name=MERS.CoV.S1.RBD.367.606.rFcTag      | feature_id[5].value > threshold=-2425.0              |
| node_14: feature_name=Flu.B_Mal/.HA1+HA2                  | feature_id[22].value > threshold=53898.0             |
| node_16: feature_name=hCoV.OC43.HE                        | feature_id[33].value <= threshold=18505.49951171875  |
| Class: healthcare workers over 180 days after vaccination |                                                      |
|                                                           |                                                      |
| Rules_180                                                 | passed counts:1                                      |
| node_0: feature_name=HuIgG_0.10                           | feature_id[2].value <= threshold=19120.166015625     |
| node_1: feature_name=SARS.CoV.2.S1.RBD.mFc                | feature_id[28].value > threshold=3773.8334350585938  |
| node_9: feature_name=HuIgM_0.03                           | feature_id[14].value <= threshold=-88.33333206176758 |
| node_10: feature_name=HuIgA_0.03                          | feature_id[26].value <= threshold=304.5              |
| node_11: feature_name=Flu.H1N1.HA1+HA2                    | feature_id[10].value <= threshold=53444.666015625    |
| node_12: feature_name=MERS.CoV.S1.RBD.367.606.rFcTag      | feature_id[5].value <= threshold=-2425.0             |
| Class: healthcare workers 60–180 days after vaccination   |                                                      |
|                                                           |                                                      |
| Rules_181                                                 | passed counts:1                                      |
| node_0: feature_name=HuIgG_0.10                           | feature_id[2].value <= threshold=19120.166015625     |
| node_1: feature_name=SARS.CoV.2.S1.RBD.mFc                | feature_id[28].value <= threshold=3773.8334350585938 |

|                                                            |                                                      |
|------------------------------------------------------------|------------------------------------------------------|
| node_2: feature_name=SARS.CoV.2.S1.RBD.mFc                 | feature_id[28].value > threshold=-414.2999954223633  |
| node_4: feature_name=hCoV.OC43.HE                          | feature_id[33].value <= threshold=414.5370330810547  |
| node_5: feature_name=Flu.H1N1.HA1+HA2                      | feature_id[10].value > threshold=29887.27734375      |
| Class: healthcare workers within 60 days after vaccination |                                                      |
|                                                            |                                                      |
| Rules_182                                                  | passed counts:1                                      |
| node_0: feature_name=HuIgG_0.10                            | feature_id[2].value <= threshold=19120.166015625     |
| node_1: feature_name=SARS.CoV.2.S1.RBD.mFc                 | feature_id[28].value <= threshold=3773.8334350585938 |
| node_2: feature_name=SARS.CoV.2.S1.RBD.mFc                 | feature_id[28].value <= threshold=-414.2999954223633 |
| Class: healthcare workers 60–180 days after vaccination    |                                                      |

### (3) Rules on the MCFS feature list

|                                                         |                                                     |
|---------------------------------------------------------|-----------------------------------------------------|
| Rules_0                                                 | passed counts:169                                   |
| node_0: feature_name=HuIgG_0.10                         | feature_id[9].value <= threshold=19120.166015625    |
| node_1: feature_name=SARS.CoV.2.S1.RBD.mFc              | feature_id[1].value > threshold=3773.8334350585938  |
| node_9: feature_name=a-HuIgG_0.30                       | feature_id[11].value <= threshold=33726.833984375   |
| node_10: feature_name=HuIgG_0.03                        | feature_id[8].value > threshold=1023.1666564941406  |
| node_20: feature_name=SARS.CoV.S1.HisTag                | feature_id[15].value > threshold=400.3000030517578  |
| node_24: feature_name=SARS.CoV.2.Spike.RBD.His.Bac      | feature_id[3].value <= threshold=36933.69921875     |
| node_25: feature_name=SARS.CoV.2.S1.RBD.mFc             | feature_id[1].value <= threshold=40856.734375       |
| node_26: feature_name=SARS.CoV.S1.HisTag                | feature_id[15].value <= threshold=15087.41650390625 |
| node_27: feature_name=SARS.CoV.2.Spike.RBD.His.HEK      | feature_id[4].value > threshold=10178.375           |
| Class: healthcare workers 60–180 days after vaccination |                                                     |
|                                                         |                                                     |
| Rules_1                                                 | passed counts:73                                    |



|                                                         |                                                     |
|---------------------------------------------------------|-----------------------------------------------------|
| node_0: feature_name=HuIgG_0.10                         | feature_id[9].value <= threshold=19120.166015625    |
| node_1: feature_name=SARS.CoV.2.S1.RBD.mFc              | feature_id[1].value <= threshold=3773.8334350585938 |
| node_2: feature_name=SARS.CoV.2.S1.HisTag               | feature_id[2].value > threshold=-383.86944580078125 |
| node_4: feature_name=SARS.CoV.2.S1                      | feature_id[6].value > threshold=435.629638671875    |
| Class: unvaccinated healthcare workers                  |                                                     |
| Rules_2                                                 | passed counts:68                                    |
| node_0: feature_name=HuIgG_0.10                         | feature_id[9].value <= threshold=19120.166015625    |
| node_1: feature_name=SARS.CoV.2.S1.RBD.mFc              | feature_id[1].value > threshold=3773.8334350585938  |
| node_9: feature_name=a-HuIgG_0.30                       | feature_id[11].value <= threshold=33726.833984375   |
| node_10: feature_name=HuIgG_0.03                        | feature_id[8].value > threshold=1023.1666564941406  |
| node_20: feature_name=SARS.CoV.S1.HisTag                | feature_id[15].value > threshold=400.3000030517578  |
| node_24: feature_name=SARS.CoV.2.Spike.RBD.His.Bac      | feature_id[3].value <= threshold=36933.69921875     |
| node_25: feature_name=SARS.CoV.2.S1.RBD.mFc             | feature_id[1].value <= threshold=40856.734375       |
| node_26: feature_name=SARS.CoV.S1.HisTag                | feature_id[15].value <= threshold=15087.41650390625 |
| node_27: feature_name=SARS.CoV.2.Spike.RBD.His.HEK      | feature_id[4].value <= threshold=10178.375          |
| node_28: feature_name=SARS.CoV.2.S1.RBD.mFc             | feature_id[1].value <= threshold=33458.650390625    |
| node_29: feature_name=SARS.CoV.2.Spike.RBD.His.HEK      | feature_id[4].value <= threshold=10129.44140625     |
| Class: healthcare workers 60–180 days after vaccination |                                                     |
| Rules_3                                                 | passed counts:54                                    |
| node_0: feature_name=HuIgG_0.10                         | feature_id[9].value > threshold=19120.166015625     |
| node_92: feature_name=a-HuIgG_0.03                      | feature_id[14].value <= threshold=19665.666015625   |
| node_93: feature_name=SARS.CoV.2.Spike.RBD.His.HEK      | feature_id[4].value > threshold=3.016666507720947   |
| node_105: feature_name=SARS.CoV.2.S1.mFcTag             | feature_id[0].value <= threshold=54010.166015625    |

|                                                            |                                                    |
|------------------------------------------------------------|----------------------------------------------------|
| node_106: feature_name=SARS.CoV.2.S1+S2                    | feature_id[7].value > threshold=48317.708984375    |
| node_228: feature_name=a-MoIgG_0.10                        | feature_id[16].value > threshold=1652.5            |
| node_230: feature_name=HuIgG_0.10                          | feature_id[9].value <= threshold=30107.666015625   |
| node_231: feature_name=HuIgG_0.03                          | feature_id[8].value <= threshold=5533.83349609375  |
| node_232: feature_name=SARS.CoV.2.Spike.RBD.His.HEK        | feature_id[4].value > threshold=11116.333374023438 |
| node_234: feature_name=SARS.CoV.2.S1+S2                    | feature_id[7].value > threshold=48882.58203125     |
| node_240: feature_name=a-HuIgG_0.03                        | feature_id[14].value > threshold=10994.83349609375 |
| Class: healthcare workers within 60 days after vaccination |                                                    |
|                                                            |                                                    |
| Rules_4                                                    | passed counts:42                                   |
| node_0: feature_name=HuIgG_0.10                            | feature_id[9].value > threshold=19120.166015625    |
| node_92: feature_name=a-HuIgG_0.03                         | feature_id[14].value <= threshold=19665.666015625  |
| node_93: feature_name=SARS.CoV.2.Spike.RBD.His.HEK         | feature_id[4].value > threshold=3.016666507720947  |
| node_105: feature_name=SARS.CoV.2.S1.mFcTag                | feature_id[0].value <= threshold=54010.166015625   |
| node_106: feature_name=SARS.CoV.2.S1+S2                    | feature_id[7].value > threshold=48317.708984375    |
| node_228: feature_name=a-MoIgG_0.10                        | feature_id[16].value > threshold=1652.5            |
| node_230: feature_name=HuIgG_0.10                          | feature_id[9].value <= threshold=30107.666015625   |
| node_231: feature_name=HuIgG_0.03                          | feature_id[8].value > threshold=5533.83349609375   |
| node_247: feature_name=HuIgG_0.10                          | feature_id[9].value > threshold=24231.0            |
| node_261: feature_name=SARS.CoV.S1.RBD.HisTag              | feature_id[10].value > threshold=24179.0419921875  |
| node_293: feature_name=SARS.CoV.2.S1.HisTag                | feature_id[2].value <= threshold=54233.25          |
| node_294: feature_name=SARS.CoV.2.S1.mFcTag                | feature_id[0].value > threshold=50885.83203125     |
| node_298: feature_name=a-HuIgG_0.30                        | feature_id[11].value > threshold=40480.16796875    |
| Class: healthcare workers within 60 days after vaccination |                                                    |
|                                                            |                                                    |

|                                                            |                                                     |
|------------------------------------------------------------|-----------------------------------------------------|
| Rules_5                                                    | passed counts:31                                    |
| node_0: feature_name=HuIgG_0.10                            | feature_id[9].value > threshold=19120.166015625     |
| node_92: feature_name=a-HuIgG_0.03                         | feature_id[14].value <= threshold=19665.666015625   |
| node_93: feature_name=SARS.CoV.2.Spike.RBD.His.HEK         | feature_id[4].value > threshold=3.0166666507720947  |
| node_105: feature_name=SARS.CoV.2.S1.mFcTag                | feature_id[0].value <= threshold=54010.166015625    |
| node_106: feature_name=SARS.CoV.2.S1+S2                    | feature_id[7].value <= threshold=48317.708984375    |
| node_107: feature_name=a-HuIgG_0.03                        | feature_id[14].value <= threshold=12099.83349609375 |
| node_108: feature_name=SARS.CoV.2.Spike.RBD.His.Bac        | feature_id[3].value <= threshold=23841.4169921875   |
| node_109: feature_name=SARS.CoV.2.S1+S2                    | feature_id[7].value > threshold=36783.25            |
| Class: healthcare workers within 60 days after vaccination |                                                     |
|                                                            |                                                     |
| Rules_6                                                    | passed counts:30                                    |
| node_0: feature_name=HuIgG_0.10                            | feature_id[9].value > threshold=19120.166015625     |
| node_92: feature_name=a-HuIgG_0.03                         | feature_id[14].value <= threshold=19665.666015625   |
| node_93: feature_name=SARS.CoV.2.Spike.RBD.His.HEK         | feature_id[4].value > threshold=3.0166666507720947  |
| node_105: feature_name=SARS.CoV.2.S1.mFcTag                | feature_id[0].value <= threshold=54010.166015625    |
| node_106: feature_name=SARS.CoV.2.S1+S2                    | feature_id[7].value > threshold=48317.708984375     |
| node_228: feature_name=a-MoIgG_0.10                        | feature_id[16].value > threshold=1652.5             |
| node_230: feature_name=HuIgG_0.10                          | feature_id[9].value <= threshold=30107.666015625    |
| node_231: feature_name=HuIgG_0.03                          | feature_id[8].value > threshold=5533.83349609375    |
| node_247: feature_name=HuIgG_0.10                          | feature_id[9].value > threshold=24231.0             |
| node_261: feature_name=SARS.CoV.S1.RBD.HisTag              | feature_id[10].value <= threshold=24179.0419921875  |
| node_262: feature_name=HuIgG_0.10                          | feature_id[9].value > threshold=25555.333984375     |
| node_266: feature_name=HuIgG_0.10                          | feature_id[9].value > threshold=25659.6669921875    |
| node_270: feature_name=SARS.CoV.S1.HisTag                  | feature_id[15].value <= threshold=10000.5830078125  |

|                                                            |                                                     |
|------------------------------------------------------------|-----------------------------------------------------|
| node_271: feature_name=SARS.CoV.2.Spike.RBD.His.Bac        | feature_id[3].value > threshold=29395.400390625     |
| Class: healthcare workers within 60 days after vaccination |                                                     |
|                                                            |                                                     |
| Rules_7                                                    | passed counts:26                                    |
| node_0: feature_name=HuIgG_0.10                            | feature_id[9].value > threshold=19120.166015625     |
| node_92: feature_name=a-HuIgG_0.03                         | feature_id[14].value <= threshold=19665.666015625   |
| node_93: feature_name=SARS.CoV.2.Spike.RBD.His.HEK         | feature_id[4].value > threshold=3.0166666507720947  |
| node_105: feature_name=SARS.CoV.2.S1.mFcTag                | feature_id[0].value <= threshold=54010.166015625    |
| node_106: feature_name=SARS.CoV.2.S1+S2                    | feature_id[7].value <= threshold=48317.708984375    |
| node_107: feature_name=a-HuIgG_0.03                        | feature_id[14].value > threshold=12099.83349609375  |
| node_155: feature_name=SARS.CoV.2.Spike.RBD.His.Bac        | feature_id[3].value > threshold=18979.9912109375    |
| node_167: feature_name=a-MoIgG_0.10                        | feature_id[16].value <= threshold=4979.5            |
| node_168: feature_name=SARS.CoV.2.S1+S2                    | feature_id[7].value > threshold=36298.75            |
| node_172: feature_name=SARS.CoV.2.S1.RBD.mFc               | feature_id[1].value <= threshold=40153.283203125    |
| node_173: feature_name=SARS.CoV.2.S1.HisTag                | feature_id[2].value > threshold=25186.375           |
| node_175: feature_name=a-HuIgG_0.10                        | feature_id[13].value > threshold=27831.166015625    |
| node_177: feature_name=SARS.CoV.2.S1                       | feature_id[6].value > threshold=29819.333984375     |
| Class: healthcare workers 60–180 days after vaccination    |                                                     |
|                                                            |                                                     |
| Rules_8                                                    | passed counts:26                                    |
| node_0: feature_name=HuIgG_0.10                            | feature_id[9].value <= threshold=19120.166015625    |
| node_1: feature_name=SARS.CoV.2.S1.RBD.mFc                 | feature_id[1].value > threshold=3773.8334350585938  |
| node_9: feature_name=a-HuIgG_0.30                          | feature_id[11].value <= threshold=33726.833984375   |
| node_10: feature_name=HuIgG_0.03                           | feature_id[8].value <= threshold=1023.1666564941406 |
| node_11: feature_name=SARS.CoV.2.S1.mFcTag                 | feature_id[0].value <= threshold=34194.916015625    |

|                                                            |                                                     |
|------------------------------------------------------------|-----------------------------------------------------|
| node_12: feature_name=SARS.CoV.2.S1+S2                     | feature_id[7].value <= threshold=26709.75           |
| Class: healthcare workers over 180 days after vaccination  |                                                     |
|                                                            |                                                     |
| Rules_9                                                    | passed counts:25                                    |
| node_0: feature_name=HuIgG_0.10                            | feature_id[9].value > threshold=19120.166015625     |
| node_92: feature_name=a-HuIgG_0.03                         | feature_id[14].value <= threshold=19665.666015625   |
| node_93: feature_name=SARS.CoV.2.Spike.RBD.His.HEK         | feature_id[4].value > threshold=3.0166666507720947  |
| node_105: feature_name=SARS.CoV.2.S1.mFcTag                | feature_id[0].value <= threshold=54010.166015625    |
| node_106: feature_name=SARS.CoV.2.S1+S2                    | feature_id[7].value <= threshold=48317.708984375    |
| node_107: feature_name=a-HuIgG_0.03                        | feature_id[14].value <= threshold=12099.83349609375 |
| node_108: feature_name=SARS.CoV.2.Spike.RBD.His.Bac        | feature_id[3].value > threshold=23841.4169921875    |
| node_118: feature_name=SARS.CoV.2.Spike.RBD.rFc            | feature_id[5].value > threshold=34554.69140625      |
| node_120: feature_name=SARS.CoV.2.S1                       | feature_id[6].value > threshold=36508.716796875     |
| node_142: feature_name=HuIgG_0.30                          | feature_id[12].value <= threshold=40622.83203125    |
| node_143: feature_name=HuIgG_0.10                          | feature_id[9].value > threshold=21439.1669921875    |
| Class: healthcare workers within 60 days after vaccination |                                                     |
|                                                            |                                                     |
| Rules_10                                                   | passed counts:23                                    |
| node_0: feature_name=HuIgG_0.10                            | feature_id[9].value > threshold=19120.166015625     |
| node_92: feature_name=a-HuIgG_0.03                         | feature_id[14].value <= threshold=19665.666015625   |
| node_93: feature_name=SARS.CoV.2.Spike.RBD.His.HEK         | feature_id[4].value > threshold=3.0166666507720947  |
| node_105: feature_name=SARS.CoV.2.S1.mFcTag                | feature_id[0].value <= threshold=54010.166015625    |
| node_106: feature_name=SARS.CoV.2.S1+S2                    | feature_id[7].value > threshold=48317.708984375     |
| node_228: feature_name=a-MoIgG_0.10                        | feature_id[16].value > threshold=1652.5             |
| node_230: feature_name=HuIgG_0.10                          | feature_id[9].value <= threshold=30107.666015625    |

|                                                            |                                                     |
|------------------------------------------------------------|-----------------------------------------------------|
| node_231: feature_name=HuIgG_0.03                          | feature_id[8].value > threshold=5533.83349609375    |
| node_247: feature_name=HuIgG_0.10                          | feature_id[9].value > threshold=24231.0             |
| node_261: feature_name=SARS.CoV.S1.RBD.HisTag              | feature_id[10].value <= threshold=24179.0419921875  |
| node_262: feature_name=HuIgG_0.10                          | feature_id[9].value <= threshold=25555.333984375    |
| node_263: feature_name=SARS.CoV.2.S1+S2                    | feature_id[7].value <= threshold=52323.916015625    |
| Class: healthcare workers within 60 days after vaccination |                                                     |
|                                                            |                                                     |
| Rules_11                                                   | passed counts:22                                    |
| node_0: feature_name=HuIgG_0.10                            | feature_id[9].value <= threshold=19120.166015625    |
| node_1: feature_name=SARS.CoV.2.S1.RBD.mFc                 | feature_id[1].value > threshold=3773.8334350585938  |
| node_9: feature_name=a-HuIgG_0.30                          | feature_id[11].value > threshold=33726.833984375    |
| node_47: feature_name=SARS.CoV.2.S1.mFcTag                 | feature_id[0].value <= threshold=43185.68359375     |
| node_48: feature_name=SARS.CoV.S1.RBD.HisTag               | feature_id[10].value > threshold=3416.129638671875  |
| node_52: feature_name=SARS.CoV.2.S1.HisTag                 | feature_id[2].value > threshold=7094.0              |
| Class: healthcare workers over 180 days after vaccination  |                                                     |
|                                                            |                                                     |
| Rules_12                                                   | passed counts:20                                    |
| node_0: feature_name=HuIgG_0.10                            | feature_id[9].value > threshold=19120.166015625     |
| node_92: feature_name=a-HuIgG_0.03                         | feature_id[14].value <= threshold=19665.666015625   |
| node_93: feature_name=SARS.CoV.2.Spike.RBD.His.HEK         | feature_id[4].value > threshold=3.0166666507720947  |
| node_105: feature_name=SARS.CoV.2.S1.mFcTag                | feature_id[0].value > threshold=54010.166015625     |
| node_305: feature_name=a-MoIgG_0.10                        | feature_id[16].value > threshold=2382.8333740234375 |
| node_309: feature_name=SARS.CoV.S1.HisTag                  | feature_id[15].value <= threshold=23460.3330078125  |
| node_310: feature_name=HuIgG_0.03                          | feature_id[8].value <= threshold=6941.33349609375   |
| node_311: feature_name=a-HuIgG_0.10                        | feature_id[13].value <= threshold=32620.5           |

|                                                           |                                                    |
|-----------------------------------------------------------|----------------------------------------------------|
| node_312: feature_name=SARS.CoV.2.Spike.RBD.His.Bac       | feature_id[3].value > threshold=31266.0            |
| node_320: feature_name=a-HuIgG_0.30                       | feature_id[11].value > threshold=47574.66796875    |
| node_346: feature_name=a-HuIgG_0.10                       | feature_id[13].value > threshold=28994.833984375   |
| node_348: feature_name=HuIgG_0.30                         | feature_id[12].value <= threshold=47369.0          |
| Class: healthcare workers 60–180 days after vaccination   |                                                    |
| Rules_13                                                  | passed counts:19                                   |
| node_0: feature_name=HuIgG_0.10                           | feature_id[9].value > threshold=19120.166015625    |
| node_92: feature_name=a-HuIgG_0.03                        | feature_id[14].value > threshold=19665.666015625   |
| node_382: feature_name=a-MoIgG_0.10                       | feature_id[16].value <= threshold=20281.6669921875 |
| node_383: feature_name=a-HuIgG_0.10                       | feature_id[13].value > threshold=33917.66796875    |
| node_391: feature_name=HuIgG_0.10                         | feature_id[9].value <= threshold=25959.0           |
| Class: healthcare workers over 180 days after vaccination |                                                    |
| Rules_14                                                  | passed counts:18                                   |
| node_0: feature_name=HuIgG_0.10                           | feature_id[9].value > threshold=19120.166015625    |
| node_92: feature_name=a-HuIgG_0.03                        | feature_id[14].value <= threshold=19665.666015625  |
| node_93: feature_name=SARS.CoV.2.Spike.RBD.His.HEK        | feature_id[4].value > threshold=3.0166666507720947 |
| node_105: feature_name=SARS.CoV.2.S1.mFcTag               | feature_id[0].value <= threshold=54010.166015625   |
| node_106: feature_name=SARS.CoV.2.S1+S2                   | feature_id[7].value <= threshold=48317.708984375   |
| node_107: feature_name=a-HuIgG_0.03                       | feature_id[14].value > threshold=12099.83349609375 |
| node_155: feature_name=SARS.CoV.2.Spike.RBD.His.Bac       | feature_id[3].value > threshold=18979.9912109375   |
| node_167: feature_name=a-MoIgG_0.10                       | feature_id[16].value > threshold=4979.5            |
| node_201: feature_name=HuIgG_0.10                         | feature_id[9].value > threshold=26006.0            |
| node_225: feature_name=SARS.CoV.2.Spike.RBD.His.HEK       | feature_id[4].value > threshold=26047.1416015625   |

|                                                            |                                                     |
|------------------------------------------------------------|-----------------------------------------------------|
| Class: healthcare workers within 60 days after vaccination |                                                     |
|                                                            |                                                     |
| Rules_15                                                   | passed counts:17                                    |
| node_0: feature_name=HuIgG_0.10                            | feature_id[9].value > threshold=19120.166015625     |
| node_92: feature_name=a-HuIgG_0.03                         | feature_id[14].value <= threshold=19665.666015625   |
| node_93: feature_name=SARS.CoV.2.Spike.RBD.His.HEK         | feature_id[4].value > threshold=3.0166666507720947  |
| node_105: feature_name=SARS.CoV.2.S1.mFcTag                | feature_id[0].value > threshold=54010.166015625     |
| node_305: feature_name=a-MoIgG_0.10                        | feature_id[16].value > threshold=2382.8333740234375 |
| node_309: feature_name=SARS.CoV.S1.HisTag                  | feature_id[15].value > threshold=23460.3330078125   |
| node_365: feature_name=a-HuIgG_0.03                        | feature_id[14].value > threshold=11128.66650390625  |
| node_367: feature_name=SARS.CoV.2.S1.mFcTag                | feature_id[0].value > threshold=54294.0             |
| node_371: feature_name=SARS.CoV.2.S1.mFcTag                | feature_id[0].value <= threshold=55620.833984375    |
| node_372: feature_name=a-HuIgG_0.10                        | feature_id[13].value > threshold=28320.6669921875   |
| node_374: feature_name=SARS.CoV.2.S1                       | feature_id[6].value > threshold=47335.5             |
| node_376: feature_name=SARS.CoV.2.S1+S2                    | feature_id[7].value <= threshold=54353.83203125     |
| Class: healthcare workers within 60 days after vaccination |                                                     |
|                                                            |                                                     |
| Rules_16                                                   | passed counts:17                                    |
| node_0: feature_name=HuIgG_0.10                            | feature_id[9].value > threshold=19120.166015625     |
| node_92: feature_name=a-HuIgG_0.03                         | feature_id[14].value <= threshold=19665.666015625   |
| node_93: feature_name=SARS.CoV.2.Spike.RBD.His.HEK         | feature_id[4].value > threshold=3.0166666507720947  |
| node_105: feature_name=SARS.CoV.2.S1.mFcTag                | feature_id[0].value <= threshold=54010.166015625    |
| node_106: feature_name=SARS.CoV.2.S1+S2                    | feature_id[7].value > threshold=48317.708984375     |
| node_228: feature_name=a-MoIgG_0.10                        | feature_id[16].value > threshold=1652.5             |
| node_230: feature_name=HuIgG_0.10                          | feature_id[9].value <= threshold=30107.666015625    |



|                                                            |                                                     |
|------------------------------------------------------------|-----------------------------------------------------|
| node_231: feature_name=HuIgG_0.03                          | feature_id[8].value > threshold=5533.83349609375    |
| node_247: feature_name=HuIgG_0.10                          | feature_id[9].value > threshold=24231.0             |
| node_261: feature_name=SARS.CoV.S1.RBD.HisTag              | feature_id[10].value <= threshold=24179.0419921875  |
| node_262: feature_name=HuIgG_0.10                          | feature_id[9].value > threshold=25555.333984375     |
| node_266: feature_name=HuIgG_0.10                          | feature_id[9].value > threshold=25659.6669921875    |
| node_270: feature_name=SARS.CoV.S1.HisTag                  | feature_id[15].value > threshold=10000.5830078125   |
| node_276: feature_name=SARS.CoV.S1.HisTag                  | feature_id[15].value > threshold=13228.125          |
| node_286: feature_name=a-MoIgG_0.10                        | feature_id[16].value <= threshold=10763.83349609375 |
| node_287: feature_name=SARS.CoV.2.Spike.RBD.His.HEK        | feature_id[4].value <= threshold=46379.583984375    |
| Class: healthcare workers within 60 days after vaccination |                                                     |
|                                                            |                                                     |
| Rules_17                                                   | passed counts:17                                    |
| node_0: feature_name=HuIgG_0.10                            | feature_id[9].value > threshold=19120.166015625     |
| node_92: feature_name=a-HuIgG_0.03                         | feature_id[14].value <= threshold=19665.666015625   |
| node_93: feature_name=SARS.CoV.2.Spike.RBD.His.HEK         | feature_id[4].value > threshold=3.0166666507720947  |
| node_105: feature_name=SARS.CoV.2.S1.mFcTag                | feature_id[0].value <= threshold=54010.166015625    |
| node_106: feature_name=SARS.CoV.2.S1+S2                    | feature_id[7].value <= threshold=48317.708984375    |
| node_107: feature_name=a-HuIgG_0.03                        | feature_id[14].value > threshold=12099.83349609375  |
| node_155: feature_name=SARS.CoV.2.Spike.RBD.His.Bac        | feature_id[3].value > threshold=18979.9912109375    |
| node_167: feature_name=a-MoIgG_0.10                        | feature_id[16].value > threshold=4979.5             |
| node_201: feature_name=HuIgG_0.10                          | feature_id[9].value <= threshold=26006.0            |
| node_202: feature_name=HuIgG_0.03                          | feature_id[8].value <= threshold=6080.0             |
| node_203: feature_name=SARS.CoV.2.S1.HisTag                | feature_id[2].value <= threshold=38575.359375       |
| node_204: feature_name=SARS.CoV.2.Spike.RBD.His.HEK        | feature_id[4].value > threshold=21567.4501953125    |
| node_208: feature_name=HuIgG_0.03                          | feature_id[8].value > threshold=4924.333251953125   |

|                                                            |                                                     |
|------------------------------------------------------------|-----------------------------------------------------|
| Class: healthcare workers within 60 days after vaccination |                                                     |
|                                                            |                                                     |
| Rules_18                                                   | passed counts:16                                    |
| node_0: feature_name=HuIgG_0.10                            | feature_id[9].value > threshold=19120.166015625     |
| node_92: feature_name=a-HuIgG_0.03                         | feature_id[14].value <= threshold=19665.666015625   |
| node_93: feature_name=SARS.CoV.2.Spike.RBD.His.HEK         | feature_id[4].value > threshold=3.0166666507720947  |
| node_105: feature_name=SARS.CoV.2.S1.mFcTag                | feature_id[0].value <= threshold=54010.166015625    |
| node_106: feature_name=SARS.CoV.2.S1+S2                    | feature_id[7].value > threshold=48317.708984375     |
| node_228: feature_name=a-MoIgG_0.10                        | feature_id[16].value > threshold=1652.5             |
| node_230: feature_name=HuIgG_0.10                          | feature_id[9].value <= threshold=30107.666015625    |
| node_231: feature_name=HuIgG_0.03                          | feature_id[8].value <= threshold=5533.83349609375   |
| node_232: feature_name=SARS.CoV.2.Spike.RBD.His.HEK        | feature_id[4].value > threshold=11116.333374023438  |
| node_234: feature_name=SARS.CoV.2.S1+S2                    | feature_id[7].value > threshold=48882.58203125      |
| node_240: feature_name=a-HuIgG_0.03                        | feature_id[14].value <= threshold=10994.83349609375 |
| node_241: feature_name=a-HuIgG_0.30                        | feature_id[11].value <= threshold=41039.83203125    |
| Class: healthcare workers within 60 days after vaccination |                                                     |
|                                                            |                                                     |
| Rules_19                                                   | passed counts:16                                    |
| node_0: feature_name=HuIgG_0.10                            | feature_id[9].value > threshold=19120.166015625     |
| node_92: feature_name=a-HuIgG_0.03                         | feature_id[14].value <= threshold=19665.666015625   |
| node_93: feature_name=SARS.CoV.2.Spike.RBD.His.HEK         | feature_id[4].value > threshold=3.0166666507720947  |
| node_105: feature_name=SARS.CoV.2.S1.mFcTag                | feature_id[0].value <= threshold=54010.166015625    |
| node_106: feature_name=SARS.CoV.2.S1+S2                    | feature_id[7].value <= threshold=48317.708984375    |
| node_107: feature_name=a-HuIgG_0.03                        | feature_id[14].value > threshold=12099.83349609375  |
| node_155: feature_name=SARS.CoV.2.Spike.RBD.His.Bac        | feature_id[3].value <= threshold=18979.9912109375   |

|                                                            |                                                     |
|------------------------------------------------------------|-----------------------------------------------------|
| node_156: feature_name=a-MoIgG_0.10                        | feature_id[16].value > threshold=1739.1666259765625 |
| node_160: feature_name=HuIgG_0.30                          | feature_id[12].value > threshold=34829.83203125     |
| node_162: feature_name=HuIgG_0.03                          | feature_id[8].value <= threshold=6681.166748046875  |
| Class: healthcare workers within 60 days after vaccination |                                                     |
|                                                            |                                                     |
| Rules_20                                                   | passed counts:15                                    |
| node_0: feature_name=HuIgG_0.10                            | feature_id[9].value > threshold=19120.166015625     |
| node_92: feature_name=a-HuIgG_0.03                         | feature_id[14].value <= threshold=19665.666015625   |
| node_93: feature_name=SARS.CoV.2.Spike.RBD.His.HEK         | feature_id[4].value > threshold=3.0166666507720947  |
| node_105: feature_name=SARS.CoV.2.S1.mFcTag                | feature_id[0].value <= threshold=54010.166015625    |
| node_106: feature_name=SARS.CoV.2.S1+S2                    | feature_id[7].value <= threshold=48317.708984375    |
| node_107: feature_name=a-HuIgG_0.03                        | feature_id[14].value <= threshold=12099.83349609375 |
| node_108: feature_name=SARS.CoV.2.Spike.RBD.His.Bac        | feature_id[3].value <= threshold=23841.4169921875   |
| node_109: feature_name=SARS.CoV.2.S1+S2                    | feature_id[7].value <= threshold=36783.25           |
| node_110: feature_name=SARS.CoV.2.S1                       | feature_id[6].value <= threshold=26291.7998046875   |
| node_111: feature_name=HuIgG_0.10                          | feature_id[9].value > threshold=20106.3330078125    |
| node_113: feature_name=HuIgG_0.03                          | feature_id[8].value <= threshold=5848.666748046875  |
| Class: healthcare workers within 60 days after vaccination |                                                     |
|                                                            |                                                     |
| Rules_21                                                   | passed counts:14                                    |
| node_0: feature_name=HuIgG_0.10                            | feature_id[9].value > threshold=19120.166015625     |
| node_92: feature_name=a-HuIgG_0.03                         | feature_id[14].value <= threshold=19665.666015625   |
| node_93: feature_name=SARS.CoV.2.Spike.RBD.His.HEK         | feature_id[4].value > threshold=3.0166666507720947  |
| node_105: feature_name=SARS.CoV.2.S1.mFcTag                | feature_id[0].value <= threshold=54010.166015625    |
| node_106: feature_name=SARS.CoV.2.S1+S2                    | feature_id[7].value > threshold=48317.708984375     |

|                                                            |                                                    |
|------------------------------------------------------------|----------------------------------------------------|
| node_228: feature_name=a-MoIgG_0.10                        | feature_id[16].value > threshold=1652.5            |
| node_230: feature_name=HuIgG_0.10                          | feature_id[9].value <= threshold=30107.666015625   |
| node_231: feature_name=HuIgG_0.03                          | feature_id[8].value > threshold=5533.83349609375   |
| node_247: feature_name=HuIgG_0.10                          | feature_id[9].value <= threshold=24231.0           |
| node_248: feature_name=SARS.CoV.2.S1.HisTag                | feature_id[2].value > threshold=43585.92578125     |
| node_256: feature_name=SARS.CoV.2.S1+S2                    | feature_id[7].value <= threshold=52592.591796875   |
| node_257: feature_name=SARS.CoV.2.S1.RBD.mFc               | feature_id[1].value > threshold=43424.416015625    |
| Class: healthcare workers within 60 days after vaccination |                                                    |
|                                                            |                                                    |
| Rules_22                                                   | passed counts:14                                   |
| node_0: feature_name=HuIgG_0.10                            | feature_id[9].value > threshold=19120.166015625    |
| node_92: feature_name=a-HuIgG_0.03                         | feature_id[14].value <= threshold=19665.666015625  |
| node_93: feature_name=SARS.CoV.2.Spike.RBD.His.HEK         | feature_id[4].value > threshold=3.016666507720947  |
| node_105: feature_name=SARS.CoV.2.S1.mFcTag                | feature_id[0].value <= threshold=54010.166015625   |
| node_106: feature_name=SARS.CoV.2.S1+S2                    | feature_id[7].value <= threshold=48317.708984375   |
| node_107: feature_name=a-HuIgG_0.03                        | feature_id[14].value > threshold=12099.83349609375 |
| node_155: feature_name=SARS.CoV.2.Spike.RBD.His.Bac        | feature_id[3].value > threshold=18979.9912109375   |
| node_167: feature_name=a-MoIgG_0.10                        | feature_id[16].value > threshold=4979.5            |
| node_201: feature_name=HuIgG_0.10                          | feature_id[9].value <= threshold=26006.0           |
| node_202: feature_name=HuIgG_0.03                          | feature_id[8].value > threshold=6080.0             |
| node_216: feature_name=SARS.CoV.2.Spike.RBD.rFc            | feature_id[5].value <= threshold=43169.25          |
| node_217: feature_name=SARS.CoV.2.Spike.RBD.His.HEK        | feature_id[4].value > threshold=12896.658203125    |
| Class: healthcare workers 60–180 days after vaccination    |                                                    |
|                                                            |                                                    |
| Rules_23                                                   | passed counts:14                                   |

|                                                         |                                                    |
|---------------------------------------------------------|----------------------------------------------------|
| node_0: feature_name=HuIgG_0.10                         | feature_id[9].value > threshold=19120.166015625    |
| node_92: feature_name=a-HuIgG_0.03                      | feature_id[14].value <= threshold=19665.666015625  |
| node_93: feature_name=SARS.CoV.2.Spike.RBD.His.HEK      | feature_id[4].value > threshold=3.016666507720947  |
| node_105: feature_name=SARS.CoV.2.S1.mFcTag             | feature_id[0].value <= threshold=54010.166015625   |
| node_106: feature_name=SARS.CoV.2.S1+S2                 | feature_id[7].value <= threshold=48317.708984375   |
| node_107: feature_name=a-HuIgG_0.03                     | feature_id[14].value > threshold=12099.83349609375 |
| node_155: feature_name=SARS.CoV.2.Spike.RBD.His.Bac     | feature_id[3].value > threshold=18979.9912109375   |
| node_167: feature_name=a-MoIgG_0.10                     | feature_id[16].value <= threshold=4979.5           |
| node_168: feature_name=SARS.CoV.2.S1+S2                 | feature_id[7].value > threshold=36298.75           |
| node_172: feature_name=SARS.CoV.2.S1.RBD.mFc            | feature_id[1].value > threshold=40153.283203125    |
| node_182: feature_name=HuIgG_0.10                       | feature_id[9].value > threshold=21919.833984375    |
| node_186: feature_name=a-HuIgG_0.10                     | feature_id[13].value > threshold=28919.0           |
| node_192: feature_name=a-HuIgG_0.10                     | feature_id[13].value <= threshold=31482.6669921875 |
| node_193: feature_name=a-HuIgG_0.03                     | feature_id[14].value > threshold=12541.0           |
| node_195: feature_name=a-HuIgG_0.30                     | feature_id[11].value > threshold=40626.0           |
| Class: healthcare workers 60–180 days after vaccination |                                                    |
|                                                         |                                                    |
| Rules_24                                                | passed counts:14                                   |
| node_0: feature_name=HuIgG_0.10                         | feature_id[9].value > threshold=19120.166015625    |
| node_92: feature_name=a-HuIgG_0.03                      | feature_id[14].value <= threshold=19665.666015625  |
| node_93: feature_name=SARS.CoV.2.Spike.RBD.His.HEK      | feature_id[4].value <= threshold=3.016666507720947 |
| node_94: feature_name=SARS.CoV.2.Spike.RBD.His.Bac      | feature_id[3].value > threshold=-51.85277557373047 |
| node_100: feature_name=SARS.CoV.2.S1.mFcTag             | feature_id[0].value <= threshold=488.5666564941406 |
| node_101: feature_name=a-HuIgG_0.30                     | feature_id[11].value > threshold=34723.5           |
| Class: unvaccinated healthcare workers                  |                                                    |

|                                                            |                                                     |
|------------------------------------------------------------|-----------------------------------------------------|
|                                                            |                                                     |
| Rules_25                                                   | passed counts:13                                    |
| node_0: feature_name=HuIgG_0.10                            | feature_id[9].value > threshold=19120.166015625     |
| node_92: feature_name=a-HuIgG_0.03                         | feature_id[14].value <= threshold=19665.666015625   |
| node_93: feature_name=SARS.CoV.2.Spike.RBD.His.HEK         | feature_id[4].value > threshold=3.0166666507720947  |
| node_105: feature_name=SARS.CoV.2.S1.mFcTag                | feature_id[0].value <= threshold=54010.166015625    |
| node_106: feature_name=SARS.CoV.2.S1+S2                    | feature_id[7].value <= threshold=48317.708984375    |
| node_107: feature_name=a-HuIgG_0.03                        | feature_id[14].value <= threshold=12099.83349609375 |
| node_108: feature_name=SARS.CoV.2.Spike.RBD.His.Bac        | feature_id[3].value > threshold=23841.4169921875    |
| node_118: feature_name=SARS.CoV.2.Spike.RBD.rFc            | feature_id[5].value > threshold=34554.69140625      |
| node_120: feature_name=SARS.CoV.2.S1                       | feature_id[6].value <= threshold=36508.716796875    |
| node_121: feature_name=HuIgG_0.10                          | feature_id[9].value > threshold=24763.3330078125    |
| node_139: feature_name=SARS.CoV.2.Spike.RBD.His.Bac        | feature_id[3].value <= threshold=33242.83203125     |
| Class: healthcare workers within 60 days after vaccination |                                                     |
|                                                            |                                                     |
| Rules_26                                                   | passed counts:12                                    |
| node_0: feature_name=HuIgG_0.10                            | feature_id[9].value > threshold=19120.166015625     |
| node_92: feature_name=a-HuIgG_0.03                         | feature_id[14].value <= threshold=19665.666015625   |
| node_93: feature_name=SARS.CoV.2.Spike.RBD.His.HEK         | feature_id[4].value > threshold=3.0166666507720947  |
| node_105: feature_name=SARS.CoV.2.S1.mFcTag                | feature_id[0].value > threshold=54010.166015625     |
| node_305: feature_name=a-MoIgG_0.10                        | feature_id[16].value > threshold=2382.8333740234375 |
| node_309: feature_name=SARS.CoV.S1.HisTag                  | feature_id[15].value <= threshold=23460.3330078125  |
| node_310: feature_name=HuIgG_0.03                          | feature_id[8].value > threshold=6941.33349609375    |
| node_362: feature_name=SARS.CoV.2.Spike.RBD.His.Bac        | feature_id[3].value <= threshold=43627.66796875     |
| Class: healthcare workers 60–180 days after vaccination    |                                                     |

|                                                            |                                                     |
|------------------------------------------------------------|-----------------------------------------------------|
| Rules_27                                                   | passed counts:12                                    |
| node_0: feature_name=HuIgG_0.10                            | feature_id[9].value > threshold=19120.166015625     |
| node_92: feature_name=a-HuIgG_0.03                         | feature_id[14].value <= threshold=19665.666015625   |
| node_93: feature_name=SARS.CoV.2.Spike.RBD.His.HEK         | feature_id[4].value > threshold=3.0166666507720947  |
| node_105: feature_name=SARS.CoV.2.S1.mFcTag                | feature_id[0].value > threshold=54010.166015625     |
| node_305: feature_name=a-MoIgG_0.10                        | feature_id[16].value > threshold=2382.8333740234375 |
| node_309: feature_name=SARS.CoV.S1.HisTag                  | feature_id[15].value <= threshold=23460.3330078125  |
| node_310: feature_name=HuIgG_0.03                          | feature_id[8].value <= threshold=6941.33349609375   |
| node_311: feature_name=a-HuIgG_0.10                        | feature_id[13].value > threshold=32620.5            |
| node_351: feature_name=SARS.CoV.S1.RBD.HisTag              | feature_id[10].value > threshold=13834.0            |
| node_359: feature_name=HuIgG_0.30                          | feature_id[12].value > threshold=39323.666015625    |
| Class: healthcare workers within 60 days after vaccination |                                                     |
| Rules_28                                                   | passed counts:12                                    |
| node_0: feature_name=HuIgG_0.10                            | feature_id[9].value <= threshold=19120.166015625    |
| node_1: feature_name=SARS.CoV.2.S1.RBD.mFc                 | feature_id[1].value > threshold=3773.8334350585938  |
| node_9: feature_name=a-HuIgG_0.30                          | feature_id[11].value > threshold=33726.833984375    |
| node_47: feature_name=SARS.CoV.2.S1.mFcTag                 | feature_id[0].value > threshold=43185.68359375      |
| node_57: feature_name=a-HuIgG_0.03                         | feature_id[14].value > threshold=10858.0            |
| node_71: feature_name=HuIgG_0.03                           | feature_id[8].value <= threshold=3796.0             |
| node_72: feature_name=SARS.CoV.2.S1.mFcTag                 | feature_id[0].value <= threshold=55206.517578125    |
| node_73: feature_name=SARS.CoV.2.S1.mFcTag                 | feature_id[0].value > threshold=46065.833984375     |
| node_75: feature_name=SARS.CoV.2.S1                        | feature_id[6].value <= threshold=35627.0            |
| Class: healthcare workers over 180 days after vaccination  |                                                     |

|                                                            |                                                      |
|------------------------------------------------------------|------------------------------------------------------|
| Rules_29                                                   | passed counts:12                                     |
| node_0: feature_name=HuIgG_0.10                            | feature_id[9].value <= threshold=19120.166015625     |
| node_1: feature_name=SARS.CoV.2.S1.RBD.mFc                 | feature_id[1].value > threshold=3773.8334350585938   |
| node_9: feature_name=a-HuIgG_0.30                          | feature_id[11].value > threshold=33726.833984375     |
| node_47: feature_name=SARS.CoV.2.S1.mFcTag                 | feature_id[0].value > threshold=43185.68359375       |
| node_57: feature_name=a-HuIgG_0.03                         | feature_id[14].value <= threshold=10858.0            |
| node_58: feature_name=HuIgG_0.30                           | feature_id[12].value <= threshold=36767.33203125     |
| node_59: feature_name=a-HuIgG_0.10                         | feature_id[13].value > threshold=21868.0             |
| node_61: feature_name=a-HuIgG_0.03                         | feature_id[14].value <= threshold=10179.0            |
| node_62: feature_name=a-HuIgG_0.30                         | feature_id[11].value > threshold=34348.833984375     |
| Class: healthcare workers within 60 days after vaccination |                                                      |
| Rules_30                                                   | passed counts:12                                     |
| node_0: feature_name=HuIgG_0.10                            | feature_id[9].value <= threshold=19120.166015625     |
| node_1: feature_name=SARS.CoV.2.S1.RBD.mFc                 | feature_id[1].value > threshold=3773.8334350585938   |
| node_9: feature_name=a-HuIgG_0.30                          | feature_id[11].value <= threshold=33726.833984375    |
| node_10: feature_name=HuIgG_0.03                           | feature_id[8].value > threshold=1023.1666564941406   |
| node_20: feature_name=SARS.CoV.S1.HisTag                   | feature_id[15].value > threshold=400.3000030517578   |
| node_24: feature_name=SARS.CoV.2.Spike.RBD.His.Bac         | feature_id[3].value <= threshold=36933.69921875      |
| node_25: feature_name=SARS.CoV.2.S1.RBD.mFc                | feature_id[1].value <= threshold=40856.734375        |
| node_26: feature_name=SARS.CoV.S1.HisTag                   | feature_id[15].value > threshold=15087.41650390625   |
| node_34: feature_name=SARS.CoV.S1.HisTag                   | feature_id[15].value > threshold=15476.41650390625   |
| node_36: feature_name=a-MoIgG_0.10                         | feature_id[16].value <= threshold=4103.6666259765625 |
| Class: healthcare workers 60–180 days after vaccination    |                                                      |



|                                                         |                                                     |
|---------------------------------------------------------|-----------------------------------------------------|
|                                                         |                                                     |
| Rules_31                                                | passed counts:11                                    |
| node_0: feature_name=HuIgG_0.10                         | feature_id[9].value > threshold=19120.166015625     |
| node_92: feature_name=a-HuIgG_0.03                      | feature_id[14].value <= threshold=19665.666015625   |
| node_93: feature_name=SARS.CoV.2.Spike.RBD.His.HEK      | feature_id[4].value > threshold=3.0166666507720947  |
| node_105: feature_name=SARS.CoV.2.S1.mFcTag             | feature_id[0].value > threshold=54010.166015625     |
| node_305: feature_name=a-MoIgG_0.10                     | feature_id[16].value > threshold=2382.8333740234375 |
| node_309: feature_name=SARS.CoV.S1.HisTag               | feature_id[15].value <= threshold=23460.3330078125  |
| node_310: feature_name=HuIgG_0.03                       | feature_id[8].value <= threshold=6941.33349609375   |
| node_311: feature_name=a-HuIgG_0.10                     | feature_id[13].value <= threshold=32620.5           |
| node_312: feature_name=SARS.CoV.2.Spike.RBD.His.Bac     | feature_id[3].value > threshold=31266.0             |
| node_320: feature_name=a-HuIgG_0.30                     | feature_id[11].value <= threshold=47574.66796875    |
| node_321: feature_name=SARS.CoV.2.S1.RBD.mFc            | feature_id[1].value > threshold=47171.166015625     |
| node_323: feature_name=SARS.CoV.2.Spike.RBD.His.Bac     | feature_id[3].value > threshold=32929.0             |
| node_325: feature_name=SARS.CoV.2.Spike.RBD.His.Bac     | feature_id[3].value > threshold=37127.798828125     |
| node_333: feature_name=a-HuIgG_0.10                     | feature_id[13].value > threshold=30243.0            |
| node_339: feature_name=a-HuIgG_0.10                     | feature_id[13].value <= threshold=31594.5           |
| node_340: feature_name=SARS.CoV.2.S1.RBD.mFc            | feature_id[1].value <= threshold=53514.666015625    |
| Class: healthcare workers 60–180 days after vaccination |                                                     |
|                                                         |                                                     |
| Rules_32                                                | passed counts:11                                    |
| node_0: feature_name=HuIgG_0.10                         | feature_id[9].value > threshold=19120.166015625     |
| node_92: feature_name=a-HuIgG_0.03                      | feature_id[14].value <= threshold=19665.666015625   |
| node_93: feature_name=SARS.CoV.2.Spike.RBD.His.HEK      | feature_id[4].value > threshold=3.0166666507720947  |
| node_105: feature_name=SARS.CoV.2.S1.mFcTag             | feature_id[0].value <= threshold=54010.166015625    |

|                                                            |                                                     |
|------------------------------------------------------------|-----------------------------------------------------|
| node_106: feature_name=SARS.CoV.2.S1+S2                    | feature_id[7].value <= threshold=48317.708984375    |
| node_107: feature_name=a-HuIgG_0.03                        | feature_id[14].value > threshold=12099.83349609375  |
| node_155: feature_name=SARS.CoV.2.Spike.RBD.His.Bac        | feature_id[3].value > threshold=18979.9912109375    |
| node_167: feature_name=a-MoIgG_0.10                        | feature_id[16].value <= threshold=4979.5            |
| node_168: feature_name=SARS.CoV.2.S1+S2                    | feature_id[7].value > threshold=36298.75            |
| node_172: feature_name=SARS.CoV.2.S1.RBD.mFc               | feature_id[1].value > threshold=40153.283203125     |
| node_182: feature_name=HuIgG_0.10                          | feature_id[9].value > threshold=21919.833984375     |
| node_186: feature_name=a-HuIgG_0.10                        | feature_id[13].value <= threshold=28919.0           |
| node_187: feature_name=SARS.CoV.S1.HisTag                  | feature_id[15].value > threshold=4488.5833740234375 |
| node_189: feature_name=a-HuIgG_0.10                        | feature_id[13].value > threshold=26194.3330078125   |
| Class: healthcare workers within 60 days after vaccination |                                                     |
|                                                            |                                                     |
| Rules_33                                                   | passed counts:11                                    |
| node_0: feature_name=HuIgG_0.10                            | feature_id[9].value <= threshold=19120.166015625    |
| node_1: feature_name=SARS.CoV.2.S1.RBD.mFc                 | feature_id[1].value > threshold=3773.8334350585938  |
| node_9: feature_name=a-HuIgG_0.30                          | feature_id[11].value > threshold=33726.833984375    |
| node_47: feature_name=SARS.CoV.2.S1.mFcTag                 | feature_id[0].value > threshold=43185.68359375      |
| node_57: feature_name=a-HuIgG_0.03                         | feature_id[14].value > threshold=10858.0            |
| node_71: feature_name=HuIgG_0.03                           | feature_id[8].value > threshold=3796.0              |
| node_83: feature_name=SARS.CoV.2.S1+S2                     | feature_id[7].value <= threshold=49967.91796875     |
| node_84: feature_name=HuIgG_0.10                           | feature_id[9].value > threshold=17143.833984375     |
| Class: healthcare workers 60–180 days after vaccination    |                                                     |
|                                                            |                                                     |
| Rules_34                                                   | passed counts:10                                    |
| node_0: feature_name=HuIgG_0.10                            | feature_id[9].value > threshold=19120.166015625     |

|                                                            |                                                     |
|------------------------------------------------------------|-----------------------------------------------------|
| node_92: feature_name=a-HuIgG_0.03                         | feature_id[14].value <= threshold=19665.666015625   |
| node_93: feature_name=SARS.CoV.2.Spike.RBD.His.HEK         | feature_id[4].value > threshold=3.0166666507720947  |
| node_105: feature_name=SARS.CoV.2.S1.mFcTag                | feature_id[0].value > threshold=54010.166015625     |
| node_305: feature_name=a-MoIgG_0.10                        | feature_id[16].value > threshold=2382.8333740234375 |
| node_309: feature_name=SARS.CoV.S1.HisTag                  | feature_id[15].value <= threshold=23460.3330078125  |
| node_310: feature_name=HuIgG_0.03                          | feature_id[8].value <= threshold=6941.33349609375   |
| node_311: feature_name=a-HuIgG_0.10                        | feature_id[13].value <= threshold=32620.5           |
| node_312: feature_name=SARS.CoV.2.Spike.RBD.His.Bac        | feature_id[3].value > threshold=31266.0             |
| node_320: feature_name=a-HuIgG_0.30                        | feature_id[11].value <= threshold=47574.66796875    |
| node_321: feature_name=SARS.CoV.2.S1.RBD.mFc               | feature_id[1].value > threshold=47171.166015625     |
| node_323: feature_name=SARS.CoV.2.Spike.RBD.His.Bac        | feature_id[3].value > threshold=32929.0             |
| node_325: feature_name=SARS.CoV.2.Spike.RBD.His.Bac        | feature_id[3].value <= threshold=37127.798828125    |
| node_326: feature_name=SARS.CoV.2.S1+S2                    | feature_id[7].value > threshold=49134.966796875     |
| node_328: feature_name=SARS.CoV.2.Spike.RBD.His.HEK        | feature_id[4].value <= threshold=35038.25           |
| Class: healthcare workers within 60 days after vaccination |                                                     |
|                                                            |                                                     |
| Rules_35                                                   | passed counts:10                                    |
| node_0: feature_name=HuIgG_0.10                            | feature_id[9].value > threshold=19120.166015625     |
| node_92: feature_name=a-HuIgG_0.03                         | feature_id[14].value <= threshold=19665.666015625   |
| node_93: feature_name=SARS.CoV.2.Spike.RBD.His.HEK         | feature_id[4].value > threshold=3.0166666507720947  |
| node_105: feature_name=SARS.CoV.2.S1.mFcTag                | feature_id[0].value > threshold=54010.166015625     |
| node_305: feature_name=a-MoIgG_0.10                        | feature_id[16].value > threshold=2382.8333740234375 |
| node_309: feature_name=SARS.CoV.S1.HisTag                  | feature_id[15].value <= threshold=23460.3330078125  |
| node_310: feature_name=HuIgG_0.03                          | feature_id[8].value <= threshold=6941.33349609375   |
| node_311: feature_name=a-HuIgG_0.10                        | feature_id[13].value <= threshold=32620.5           |

|                                                            |                                                     |
|------------------------------------------------------------|-----------------------------------------------------|
| node_312: feature_name=SARS.CoV.2.Spike.RBD.His.Bac        | feature_id[3].value > threshold=31266.0             |
| node_320: feature_name=a-HuIgG_0.30                        | feature_id[11].value <= threshold=47574.66796875    |
| node_321: feature_name=SARS.CoV.2.S1.RBD.mFc               | feature_id[1].value <= threshold=47171.166015625    |
| Class: healthcare workers 60–180 days after vaccination    |                                                     |
|                                                            |                                                     |
| Rules_36                                                   | passed counts:10                                    |
| node_0: feature_name=HuIgG_0.10                            | feature_id[9].value > threshold=19120.166015625     |
| node_92: feature_name=a-HuIgG_0.03                         | feature_id[14].value <= threshold=19665.666015625   |
| node_93: feature_name=SARS.CoV.2.Spike.RBD.His.HEK         | feature_id[4].value > threshold=3.0166666507720947  |
| node_105: feature_name=SARS.CoV.2.S1.mFcTag                | feature_id[0].value > threshold=54010.166015625     |
| node_305: feature_name=a-MoIgG_0.10                        | feature_id[16].value > threshold=2382.8333740234375 |
| node_309: feature_name=SARS.CoV.S1.HisTag                  | feature_id[15].value <= threshold=23460.3330078125  |
| node_310: feature_name=HuIgG_0.03                          | feature_id[8].value <= threshold=6941.33349609375   |
| node_311: feature_name=a-HuIgG_0.10                        | feature_id[13].value <= threshold=32620.5           |
| node_312: feature_name=SARS.CoV.2.Spike.RBD.His.Bac        | feature_id[3].value <= threshold=31266.0            |
| node_313: feature_name=HuIgG_0.10                          | feature_id[9].value > threshold=22308.5             |
| node_317: feature_name=SARS.CoV.2.Spike.RBD.rFc            | feature_id[5].value <= threshold=47206.232421875    |
| Class: healthcare workers within 60 days after vaccination |                                                     |
|                                                            |                                                     |
| Rules_37                                                   | passed counts:10                                    |
| node_0: feature_name=HuIgG_0.10                            | feature_id[9].value > threshold=19120.166015625     |
| node_92: feature_name=a-HuIgG_0.03                         | feature_id[14].value <= threshold=19665.666015625   |
| node_93: feature_name=SARS.CoV.2.Spike.RBD.His.HEK         | feature_id[4].value > threshold=3.0166666507720947  |
| node_105: feature_name=SARS.CoV.2.S1.mFcTag                | feature_id[0].value <= threshold=54010.166015625    |
| node_106: feature_name=SARS.CoV.2.S1+S2                    | feature_id[7].value <= threshold=48317.708984375    |

|                                                            |                                                     |
|------------------------------------------------------------|-----------------------------------------------------|
| node_107: feature_name=a-HuIgG_0.03                        | feature_id[14].value <= threshold=12099.83349609375 |
| node_108: feature_name=SARS.CoV.2.Spike.RBD.His.Bac        | feature_id[3].value > threshold=23841.4169921875    |
| node_118: feature_name=SARS.CoV.2.Spike.RBD.rFc            | feature_id[5].value > threshold=34554.69140625      |
| node_120: feature_name=SARS.CoV.2.S1                       | feature_id[6].value <= threshold=36508.716796875    |
| node_121: feature_name=HuIgG_0.10                          | feature_id[9].value <= threshold=24763.3330078125   |
| node_122: feature_name=SARS.CoV.2.Spike.RBD.rFc            | feature_id[5].value <= threshold=42966.541015625    |
| node_123: feature_name=SARS.CoV.2.S1+S2                    | feature_id[7].value > threshold=43434.54296875      |
| node_135: feature_name=HuIgG_0.10                          | feature_id[9].value <= threshold=24375.1669921875   |
| Class: healthcare workers within 60 days after vaccination |                                                     |
|                                                            |                                                     |
| Rules_38                                                   | passed counts:10                                    |
| node_0: feature_name=HuIgG_0.10                            | feature_id[9].value <= threshold=19120.166015625    |
| node_1: feature_name=SARS.CoV.2.S1.RBD.mFc                 | feature_id[1].value > threshold=3773.8334350585938  |
| node_9: feature_name=a-HuIgG_0.30                          | feature_id[11].value <= threshold=33726.833984375   |
| node_10: feature_name=HuIgG_0.03                           | feature_id[8].value <= threshold=1023.1666564941406 |
| node_11: feature_name=SARS.CoV.2.S1.mFcTag                 | feature_id[0].value > threshold=34194.916015625     |
| node_17: feature_name=HuIgG_0.10                           | feature_id[9].value <= threshold=7582.83349609375   |
| Class: healthcare workers 60–180 days after vaccination    |                                                     |
|                                                            |                                                     |
| Rules_39                                                   | passed counts:9                                     |
| node_0: feature_name=HuIgG_0.10                            | feature_id[9].value > threshold=19120.166015625     |
| node_92: feature_name=a-HuIgG_0.03                         | feature_id[14].value > threshold=19665.666015625    |
| node_382: feature_name=a-MoIgG_0.10                        | feature_id[16].value <= threshold=20281.6669921875  |
| node_383: feature_name=a-HuIgG_0.10                        | feature_id[13].value <= threshold=33917.66796875    |
| node_384: feature_name=SARS.CoV.2.S1.mFcTag                | feature_id[0].value > threshold=52180.75            |

|                                                         |                                                    |
|---------------------------------------------------------|----------------------------------------------------|
| node_388: feature_name=SARS.CoV.S1.RBD.HisTag           | feature_id[10].value <= threshold=52228.166015625  |
| Class: healthcare workers 60–180 days after vaccination |                                                    |
|                                                         |                                                    |
| Rules_40                                                | passed counts:9                                    |
| node_0: feature_name=HuIgG_0.10                         | feature_id[9].value > threshold=19120.166015625    |
| node_92: feature_name=a-HuIgG_0.03                      | feature_id[14].value <= threshold=19665.666015625  |
| node_93: feature_name=SARS.CoV.2.Spike.RBD.His.HEK      | feature_id[4].value > threshold=3.0166666507720947 |
| node_105: feature_name=SARS.CoV.2.S1.mFcTag             | feature_id[0].value <= threshold=54010.166015625   |
| node_106: feature_name=SARS.CoV.2.S1+S2                 | feature_id[7].value <= threshold=48317.708984375   |
| node_107: feature_name=a-HuIgG_0.03                     | feature_id[14].value > threshold=12099.83349609375 |
| node_155: feature_name=SARS.CoV.2.Spike.RBD.His.Bac     | feature_id[3].value > threshold=18979.9912109375   |
| node_167: feature_name=a-MoIgG_0.10                     | feature_id[16].value <= threshold=4979.5           |
| node_168: feature_name=SARS.CoV.2.S1+S2                 | feature_id[7].value > threshold=36298.75           |
| node_172: feature_name=SARS.CoV.2.S1.RBD.mFc            | feature_id[1].value > threshold=40153.283203125    |
| node_182: feature_name=HuIgG_0.10                       | feature_id[9].value <= threshold=21919.833984375   |
| node_183: feature_name=a-HuIgG_0.30                     | feature_id[11].value <= threshold=51690.5          |
| Class: healthcare workers 60–180 days after vaccination |                                                    |
|                                                         |                                                    |
| Rules_41                                                | passed counts:9                                    |
| node_0: feature_name=HuIgG_0.10                         | feature_id[9].value <= threshold=19120.166015625   |
| node_1: feature_name=SARS.CoV.2.S1.RBD.mFc              | feature_id[1].value > threshold=3773.8334350585938 |
| node_9: feature_name=a-HuIgG_0.30                       | feature_id[11].value <= threshold=33726.833984375  |
| node_10: feature_name=HuIgG_0.03                        | feature_id[8].value > threshold=1023.1666564941406 |
| node_20: feature_name=SARS.CoV.S1.HisTag                | feature_id[15].value > threshold=400.3000030517578 |
| node_24: feature_name=SARS.CoV.2.Spike.RBD.His.Bac      | feature_id[3].value <= threshold=36933.69921875    |

|                                                         |                                                    |
|---------------------------------------------------------|----------------------------------------------------|
| node_25: feature_name=SARS.CoV.2.S1.RBD.mFc             | feature_id[1].value > threshold=40856.734375       |
| node_41: feature_name=SARS.CoV.2.S1+S2                  | feature_id[7].value > threshold=36853.75           |
| Class: healthcare workers 60–180 days after vaccination |                                                    |
|                                                         |                                                    |
| Rules_42                                                | passed counts:8                                    |
| node_0: feature_name=HuIgG_0.10                         | feature_id[9].value > threshold=19120.166015625    |
| node_92: feature_name=a-HuIgG_0.03                      | feature_id[14].value > threshold=19665.666015625   |
| node_382: feature_name=a-MoIgG_0.10                     | feature_id[16].value <= threshold=20281.6669921875 |
| node_383: feature_name=a-HuIgG_0.10                     | feature_id[13].value > threshold=33917.66796875    |
| node_391: feature_name=HuIgG_0.10                       | feature_id[9].value > threshold=25959.0            |
| node_393: feature_name=HuIgG_0.30                       | feature_id[12].value <= threshold=52448.166015625  |
| node_394: feature_name=a-HuIgG_0.10                     | feature_id[13].value <= threshold=38348.5          |
| node_395: feature_name=a-HuIgG_0.30                     | feature_id[11].value > threshold=53098.833984375   |
| Class: healthcare workers 60–180 days after vaccination |                                                    |
|                                                         |                                                    |
| Rules_43                                                | passed counts:8                                    |
| node_0: feature_name=HuIgG_0.10                         | feature_id[9].value > threshold=19120.166015625    |
| node_92: feature_name=a-HuIgG_0.03                      | feature_id[14].value <= threshold=19665.666015625  |
| node_93: feature_name=SARS.CoV.2.Spike.RBD.His.HEK      | feature_id[4].value > threshold=3.016666507720947  |
| node_105: feature_name=SARS.CoV.2.S1.mFcTag             | feature_id[0].value <= threshold=54010.166015625   |
| node_106: feature_name=SARS.CoV.2.S1+S2                 | feature_id[7].value > threshold=48317.708984375    |
| node_228: feature_name=a-MoIgG_0.10                     | feature_id[16].value > threshold=1652.5            |
| node_230: feature_name=HuIgG_0.10                       | feature_id[9].value <= threshold=30107.666015625   |
| node_231: feature_name=HuIgG_0.03                       | feature_id[8].value > threshold=5533.83349609375   |
| node_247: feature_name=HuIgG_0.10                       | feature_id[9].value > threshold=24231.0            |

|                                                         |                                                    |
|---------------------------------------------------------|----------------------------------------------------|
| node_261: feature_name=SARS.CoV.S1.RBD.HisTag           | feature_id[10].value <= threshold=24179.0419921875 |
| node_262: feature_name=HuIgG_0.10                       | feature_id[9].value > threshold=25555.333984375    |
| node_266: feature_name=HuIgG_0.10                       | feature_id[9].value > threshold=25659.6669921875   |
| node_270: feature_name=SARS.CoV.S1.HisTag               | feature_id[15].value > threshold=10000.5830078125  |
| node_276: feature_name=SARS.CoV.S1.HisTag               | feature_id[15].value <= threshold=13228.125        |
| node_277: feature_name=SARS.CoV.2.Spike.RBD.His.Bac     | feature_id[3].value > threshold=33671.91796875     |
| node_279: feature_name=SARS.CoV.2.S1.RBD.mFc            | feature_id[1].value <= threshold=52697.666015625   |
| node_280: feature_name=SARS.CoV.2.Spike.RBD.His.Bac     | feature_id[3].value > threshold=34984.25           |
| Class: healthcare workers 60–180 days after vaccination |                                                    |
|                                                         |                                                    |
| Rules_44                                                | passed counts:8                                    |
| node_0: feature_name=HuIgG_0.10                         | feature_id[9].value > threshold=19120.166015625    |
| node_92: feature_name=a-HuIgG_0.03                      | feature_id[14].value <= threshold=19665.666015625  |
| node_93: feature_name=SARS.CoV.2.Spike.RBD.His.HEK      | feature_id[4].value > threshold=3.0166666507720947 |
| node_105: feature_name=SARS.CoV.2.S1.mFcTag             | feature_id[0].value <= threshold=54010.166015625   |
| node_106: feature_name=SARS.CoV.2.S1+S2                 | feature_id[7].value > threshold=48317.708984375    |
| node_228: feature_name=a-MoIgG_0.10                     | feature_id[16].value > threshold=1652.5            |
| node_230: feature_name=HuIgG_0.10                       | feature_id[9].value <= threshold=30107.666015625   |
| node_231: feature_name=HuIgG_0.03                       | feature_id[8].value > threshold=5533.83349609375   |
| node_247: feature_name=HuIgG_0.10                       | feature_id[9].value <= threshold=24231.0           |
| node_248: feature_name=SARS.CoV.2.S1.HisTag             | feature_id[2].value <= threshold=43585.92578125    |
| node_249: feature_name=HuIgG_0.10                       | feature_id[9].value > threshold=23668.3330078125   |
| Class: healthcare workers 60–180 days after vaccination |                                                    |
|                                                         |                                                    |
| Rules_45                                                | passed counts:8                                    |



|                                                            |                                                     |
|------------------------------------------------------------|-----------------------------------------------------|
| node_0: feature_name=HuIgG_0.10                            | feature_id[9].value > threshold=19120.166015625     |
| node_92: feature_name=a-HuIgG_0.03                         | feature_id[14].value <= threshold=19665.666015625   |
| node_93: feature_name=SARS.CoV.2.Spike.RBD.His.HEK         | feature_id[4].value > threshold=3.016666507720947   |
| node_105: feature_name=SARS.CoV.2.S1.mFcTag                | feature_id[0].value <= threshold=54010.166015625    |
| node_106: feature_name=SARS.CoV.2.S1+S2                    | feature_id[7].value <= threshold=48317.708984375    |
| node_107: feature_name=a-HuIgG_0.03                        | feature_id[14].value <= threshold=12099.83349609375 |
| node_108: feature_name=SARS.CoV.2.Spike.RBD.His.Bac        | feature_id[3].value > threshold=23841.4169921875    |
| node_118: feature_name=SARS.CoV.2.Spike.RBD.rFc            | feature_id[5].value > threshold=34554.69140625      |
| node_120: feature_name=SARS.CoV.2.S1                       | feature_id[6].value <= threshold=36508.716796875    |
| node_121: feature_name=HuIgG_0.10                          | feature_id[9].value <= threshold=24763.3330078125   |
| node_122: feature_name=SARS.CoV.2.Spike.RBD.rFc            | feature_id[5].value <= threshold=42966.541015625    |
| node_123: feature_name=SARS.CoV.2.S1+S2                    | feature_id[7].value <= threshold=43434.54296875     |
| node_124: feature_name=SARS.CoV.2.S1+S2                    | feature_id[7].value <= threshold=42800.94140625     |
| node_125: feature_name=SARS.CoV.2.S1.mFcTag                | feature_id[0].value > threshold=47427.1328125       |
| node_129: feature_name=a-MoIgG_0.10                        | feature_id[16].value <= threshold=5634.0            |
| Class: healthcare workers within 60 days after vaccination |                                                     |
|                                                            |                                                     |
| Rules_46                                                   | passed counts:8                                     |
| node_0: feature_name=HuIgG_0.10                            | feature_id[9].value <= threshold=19120.166015625    |
| node_1: feature_name=SARS.CoV.2.S1.RBD.mFc                 | feature_id[1].value > threshold=3773.8334350585938  |
| node_9: feature_name=a-HuIgG_0.30                          | feature_id[11].value > threshold=33726.833984375    |
| node_47: feature_name=SARS.CoV.2.S1.mFcTag                 | feature_id[0].value > threshold=43185.68359375      |
| node_57: feature_name=a-HuIgG_0.03                         | feature_id[14].value > threshold=10858.0            |
| node_71: feature_name=HuIgG_0.03                           | feature_id[8].value <= threshold=3796.0             |
| node_72: feature_name=SARS.CoV.2.S1.mFcTag                 | feature_id[0].value <= threshold=55206.517578125    |

|                                                           |                                                    |
|-----------------------------------------------------------|----------------------------------------------------|
| node_73: feature_name=SARS.CoV.2.S1.mFcTag                | feature_id[0].value > threshold=46065.833984375    |
| node_75: feature_name=SARS.CoV.2.S1                       | feature_id[6].value > threshold=35627.0            |
| node_77: feature_name=SARS.CoV.S1.HisTag                  | feature_id[15].value > threshold=21926.9169921875  |
| Class: healthcare workers over 180 days after vaccination |                                                    |
|                                                           |                                                    |
| Rules_47                                                  | passed counts:8                                    |
| node_0: feature_name=HuIgG_0.10                           | feature_id[9].value <= threshold=19120.166015625   |
| node_1: feature_name=SARS.CoV.2.S1.RBD.mFc                | feature_id[1].value > threshold=3773.8334350585938 |
| node_9: feature_name=a-HuIgG_0.30                         | feature_id[11].value > threshold=33726.833984375   |
| node_47: feature_name=SARS.CoV.2.S1.mFcTag                | feature_id[0].value > threshold=43185.68359375     |
| node_57: feature_name=a-HuIgG_0.03                        | feature_id[14].value > threshold=10858.0           |
| node_71: feature_name=HuIgG_0.03                          | feature_id[8].value <= threshold=3796.0            |
| node_72: feature_name=SARS.CoV.2.S1.mFcTag                | feature_id[0].value <= threshold=55206.517578125   |
| node_73: feature_name=SARS.CoV.2.S1.mFcTag                | feature_id[0].value > threshold=46065.833984375    |
| node_75: feature_name=SARS.CoV.2.S1                       | feature_id[6].value > threshold=35627.0            |
| node_77: feature_name=SARS.CoV.S1.HisTag                  | feature_id[15].value <= threshold=21926.9169921875 |
| node_78: feature_name=SARS.CoV.2.S1+S2                    | feature_id[7].value > threshold=40211.734375       |
| Class: healthcare workers 60–180 days after vaccination   |                                                    |
|                                                           |                                                    |
| Rules_48                                                  | passed counts:7                                    |
| node_0: feature_name=HuIgG_0.10                           | feature_id[9].value > threshold=19120.166015625    |
| node_92: feature_name=a-HuIgG_0.03                        | feature_id[14].value <= threshold=19665.666015625  |
| node_93: feature_name=SARS.CoV.2.Spike.RBD.His.HEK        | feature_id[4].value > threshold=3.0166666507720947 |
| node_105: feature_name=SARS.CoV.2.S1.mFcTag               | feature_id[0].value <= threshold=54010.166015625   |
| node_106: feature_name=SARS.CoV.2.S1+S2                   | feature_id[7].value <= threshold=48317.708984375   |

|                                                            |                                                     |
|------------------------------------------------------------|-----------------------------------------------------|
| node_107: feature_name=a-HuIgG_0.03                        | feature_id[14].value <= threshold=12099.83349609375 |
| node_108: feature_name=SARS.CoV.2.Spike.RBD.His.Bac        | feature_id[3].value > threshold=23841.4169921875    |
| node_118: feature_name=SARS.CoV.2.Spike.RBD.rFc            | feature_id[5].value > threshold=34554.69140625      |
| node_120: feature_name=SARS.CoV.2.S1                       | feature_id[6].value > threshold=36508.716796875     |
| node_142: feature_name=HuIgG_0.30                          | feature_id[12].value <= threshold=40622.83203125    |
| node_143: feature_name=HuIgG_0.10                          | feature_id[9].value <= threshold=21439.1669921875   |
| node_144: feature_name=SARS.CoV.2.S1.mFcTag                | feature_id[0].value <= threshold=51094.66796875     |
| Class: healthcare workers within 60 days after vaccination |                                                     |
|                                                            |                                                     |
| Rules_49                                                   | passed counts:7                                     |
| node_0: feature_name=HuIgG_0.10                            | feature_id[9].value > threshold=19120.166015625     |
| node_92: feature_name=a-HuIgG_0.03                         | feature_id[14].value <= threshold=19665.666015625   |
| node_93: feature_name=SARS.CoV.2.Spike.RBD.His.HEK         | feature_id[4].value > threshold=3.0166666507720947  |
| node_105: feature_name=SARS.CoV.2.S1.mFcTag                | feature_id[0].value <= threshold=54010.166015625    |
| node_106: feature_name=SARS.CoV.2.S1+S2                    | feature_id[7].value <= threshold=48317.708984375    |
| node_107: feature_name=a-HuIgG_0.03                        | feature_id[14].value <= threshold=12099.83349609375 |
| node_108: feature_name=SARS.CoV.2.Spike.RBD.His.Bac        | feature_id[3].value > threshold=23841.4169921875    |
| node_118: feature_name=SARS.CoV.2.Spike.RBD.rFc            | feature_id[5].value <= threshold=34554.69140625     |
| Class: healthcare workers 60–180 days after vaccination    |                                                     |
|                                                            |                                                     |
| Rules_50                                                   | passed counts:6                                     |
| node_0: feature_name=HuIgG_0.10                            | feature_id[9].value > threshold=19120.166015625     |
| node_92: feature_name=a-HuIgG_0.03                         | feature_id[14].value <= threshold=19665.666015625   |
| node_93: feature_name=SARS.CoV.2.Spike.RBD.His.HEK         | feature_id[4].value > threshold=3.0166666507720947  |
| node_105: feature_name=SARS.CoV.2.S1.mFcTag                | feature_id[0].value <= threshold=54010.166015625    |

|                                                            |                                                     |
|------------------------------------------------------------|-----------------------------------------------------|
| node_106: feature_name=SARS.CoV.2.S1+S2                    | feature_id[7].value > threshold=48317.708984375     |
| node_228: feature_name=a-MoIgG_0.10                        | feature_id[16].value > threshold=1652.5             |
| node_230: feature_name=HuIgG_0.10                          | feature_id[9].value <= threshold=30107.666015625    |
| node_231: feature_name=HuIgG_0.03                          | feature_id[8].value > threshold=5533.83349609375    |
| node_247: feature_name=HuIgG_0.10                          | feature_id[9].value > threshold=24231.0             |
| node_261: feature_name=SARS.CoV.S1.RBD.HisTag              | feature_id[10].value <= threshold=24179.0419921875  |
| node_262: feature_name=HuIgG_0.10                          | feature_id[9].value > threshold=25555.333984375     |
| node_266: feature_name=HuIgG_0.10                          | feature_id[9].value <= threshold=25659.6669921875   |
| node_267: feature_name=a-MoIgG_0.10                        | feature_id[16].value > threshold=4330.1666259765625 |
| Class: healthcare workers 60–180 days after vaccination    |                                                     |
|                                                            |                                                     |
| Rules_51                                                   | passed counts:6                                     |
| node_0: feature_name=HuIgG_0.10                            | feature_id[9].value > threshold=19120.166015625     |
| node_92: feature_name=a-HuIgG_0.03                         | feature_id[14].value <= threshold=19665.666015625   |
| node_93: feature_name=SARS.CoV.2.Spike.RBD.His.HEK         | feature_id[4].value > threshold=3.0166666507720947  |
| node_105: feature_name=SARS.CoV.2.S1.mFcTag                | feature_id[0].value <= threshold=54010.166015625    |
| node_106: feature_name=SARS.CoV.2.S1+S2                    | feature_id[7].value > threshold=48317.708984375     |
| node_228: feature_name=a-MoIgG_0.10                        | feature_id[16].value > threshold=1652.5             |
| node_230: feature_name=HuIgG_0.10                          | feature_id[9].value <= threshold=30107.666015625    |
| node_231: feature_name=HuIgG_0.03                          | feature_id[8].value <= threshold=5533.83349609375   |
| node_232: feature_name=SARS.CoV.2.Spike.RBD.His.HEK        | feature_id[4].value > threshold=11116.333374023438  |
| node_234: feature_name=SARS.CoV.2.S1+S2                    | feature_id[7].value <= threshold=48882.58203125     |
| node_235: feature_name=SARS.CoV.2.Spike.RBD.rFc            | feature_id[5].value > threshold=45170.75            |
| Class: healthcare workers within 60 days after vaccination |                                                     |
|                                                            |                                                     |

|                                                         |                                                    |
|---------------------------------------------------------|----------------------------------------------------|
| Rules_52                                                | passed counts:6                                    |
| node_0: feature_name=HuIgG_0.10                         | feature_id[9].value > threshold=19120.166015625    |
| node_92: feature_name=a-HuIgG_0.03                      | feature_id[14].value <= threshold=19665.666015625  |
| node_93: feature_name=SARS.CoV.2.Spike.RBD.His.HEK      | feature_id[4].value > threshold=3.0166666507720947 |
| node_105: feature_name=SARS.CoV.2.S1.mFcTag             | feature_id[0].value <= threshold=54010.166015625   |
| node_106: feature_name=SARS.CoV.2.S1+S2                 | feature_id[7].value <= threshold=48317.708984375   |
| node_107: feature_name=a-HuIgG_0.03                     | feature_id[14].value > threshold=12099.83349609375 |
| node_155: feature_name=SARS.CoV.2.Spike.RBD.His.Bac     | feature_id[3].value > threshold=18979.9912109375   |
| node_167: feature_name=a-MoIgG_0.10                     | feature_id[16].value > threshold=4979.5            |
| node_201: feature_name=HuIgG_0.10                       | feature_id[9].value <= threshold=26006.0           |
| node_202: feature_name=HuIgG_0.03                       | feature_id[8].value > threshold=6080.0             |
| node_216: feature_name=SARS.CoV.2.Spike.RBD.rFc         | feature_id[5].value > threshold=43169.25           |
| node_220: feature_name=SARS.CoV.2.Spike.RBD.His.Bac     | feature_id[3].value > threshold=34138.75           |
| Class: healthcare workers 60–180 days after vaccination |                                                    |
|                                                         |                                                    |
| Rules_53                                                | passed counts:6                                    |
| node_0: feature_name=HuIgG_0.10                         | feature_id[9].value > threshold=19120.166015625    |
| node_92: feature_name=a-HuIgG_0.03                      | feature_id[14].value <= threshold=19665.666015625  |
| node_93: feature_name=SARS.CoV.2.Spike.RBD.His.HEK      | feature_id[4].value > threshold=3.0166666507720947 |
| node_105: feature_name=SARS.CoV.2.S1.mFcTag             | feature_id[0].value <= threshold=54010.166015625   |
| node_106: feature_name=SARS.CoV.2.S1+S2                 | feature_id[7].value <= threshold=48317.708984375   |
| node_107: feature_name=a-HuIgG_0.03                     | feature_id[14].value > threshold=12099.83349609375 |
| node_155: feature_name=SARS.CoV.2.Spike.RBD.His.Bac     | feature_id[3].value > threshold=18979.9912109375   |
| node_167: feature_name=a-MoIgG_0.10                     | feature_id[16].value > threshold=4979.5            |
| node_201: feature_name=HuIgG_0.10                       | feature_id[9].value <= threshold=26006.0           |

|                                                            |                                                    |
|------------------------------------------------------------|----------------------------------------------------|
| node_202: feature_name=HuIgG_0.03                          | feature_id[8].value > threshold=6080.0             |
| node_216: feature_name=SARS.CoV.2.Spike.RBD.rFc            | feature_id[5].value > threshold=43169.25           |
| node_220: feature_name=SARS.CoV.2.Spike.RBD.His.Bac        | feature_id[3].value <= threshold=34138.75          |
| node_221: feature_name=SARS.CoV.2.Spike.RBD.His.HEK        | feature_id[4].value <= threshold=37141.416015625   |
| Class: healthcare workers within 60 days after vaccination |                                                    |
|                                                            |                                                    |
| Rules_54                                                   | passed counts:6                                    |
| node_0: feature_name=HuIgG_0.10                            | feature_id[9].value > threshold=19120.166015625    |
| node_92: feature_name=a-HuIgG_0.03                         | feature_id[14].value <= threshold=19665.666015625  |
| node_93: feature_name=SARS.CoV.2.Spike.RBD.His.HEK         | feature_id[4].value > threshold=3.0166666507720947 |
| node_105: feature_name=SARS.CoV.2.S1.mFcTag                | feature_id[0].value <= threshold=54010.166015625   |
| node_106: feature_name=SARS.CoV.2.S1+S2                    | feature_id[7].value <= threshold=48317.708984375   |
| node_107: feature_name=a-HuIgG_0.03                        | feature_id[14].value > threshold=12099.83349609375 |
| node_155: feature_name=SARS.CoV.2.Spike.RBD.His.Bac        | feature_id[3].value > threshold=18979.9912109375   |
| node_167: feature_name=a-MoIgG_0.10                        | feature_id[16].value <= threshold=4979.5           |
| node_168: feature_name=SARS.CoV.2.S1+S2                    | feature_id[7].value > threshold=36298.75           |
| node_172: feature_name=SARS.CoV.2.S1.RBD.mFc               | feature_id[1].value > threshold=40153.283203125    |
| node_182: feature_name=HuIgG_0.10                          | feature_id[9].value > threshold=21919.833984375    |
| node_186: feature_name=a-HuIgG_0.10                        | feature_id[13].value > threshold=28919.0           |
| node_192: feature_name=a-HuIgG_0.10                        | feature_id[13].value > threshold=31482.6669921875  |
| node_198: feature_name=SARS.CoV.2.S1.mFcTag                | feature_id[0].value > threshold=50108.16796875     |
| Class: healthcare workers within 60 days after vaccination |                                                    |
|                                                            |                                                    |
| Rules_55                                                   | passed counts:6                                    |
| node_0: feature_name=HuIgG_0.10                            | feature_id[9].value > threshold=19120.166015625    |

|                                                           |                                                     |
|-----------------------------------------------------------|-----------------------------------------------------|
| node_92: feature_name=a-HuIgG_0.03                        | feature_id[14].value <= threshold=19665.666015625   |
| node_93: feature_name=SARS.CoV.2.Spike.RBD.His.HEK        | feature_id[4].value > threshold=3.0166666507720947  |
| node_105: feature_name=SARS.CoV.2.S1.mFcTag               | feature_id[0].value <= threshold=54010.166015625    |
| node_106: feature_name=SARS.CoV.2.S1+S2                   | feature_id[7].value <= threshold=48317.708984375    |
| node_107: feature_name=a-HuIgG_0.03                       | feature_id[14].value > threshold=12099.83349609375  |
| node_155: feature_name=SARS.CoV.2.Spike.RBD.His.Bac       | feature_id[3].value > threshold=18979.9912109375    |
| node_167: feature_name=a-MoIgG_0.10                       | feature_id[16].value <= threshold=4979.5            |
| node_168: feature_name=SARS.CoV.2.S1+S2                   | feature_id[7].value <= threshold=36298.75           |
| node_169: feature_name=SARS.CoV.S1.RBD.HisTag             | feature_id[10].value > threshold=6739.833251953125  |
| Class: healthcare workers over 180 days after vaccination |                                                     |
|                                                           |                                                     |
| Rules_56                                                  | passed counts:6                                     |
| node_0: feature_name=HuIgG_0.10                           | feature_id[9].value > threshold=19120.166015625     |
| node_92: feature_name=a-HuIgG_0.03                        | feature_id[14].value <= threshold=19665.666015625   |
| node_93: feature_name=SARS.CoV.2.Spike.RBD.His.HEK        | feature_id[4].value > threshold=3.0166666507720947  |
| node_105: feature_name=SARS.CoV.2.S1.mFcTag               | feature_id[0].value <= threshold=54010.166015625    |
| node_106: feature_name=SARS.CoV.2.S1+S2                   | feature_id[7].value <= threshold=48317.708984375    |
| node_107: feature_name=a-HuIgG_0.03                       | feature_id[14].value <= threshold=12099.83349609375 |
| node_108: feature_name=SARS.CoV.2.Spike.RBD.His.Bac       | feature_id[3].value > threshold=23841.4169921875    |
| node_118: feature_name=SARS.CoV.2.Spike.RBD.rFc           | feature_id[5].value > threshold=34554.69140625      |
| node_120: feature_name=SARS.CoV.2.S1                      | feature_id[6].value <= threshold=36508.716796875    |
| node_121: feature_name=HuIgG_0.10                         | feature_id[9].value <= threshold=24763.3330078125   |
| node_122: feature_name=SARS.CoV.2.Spike.RBD.rFc           | feature_id[5].value > threshold=42966.541015625     |
| Class: healthcare workers 60–180 days after vaccination   |                                                     |
|                                                           |                                                     |

|                                                         |                                                     |
|---------------------------------------------------------|-----------------------------------------------------|
| Rules_57                                                | passed counts:6                                     |
| node_0: feature_name=HuIgG_0.10                         | feature_id[9].value > threshold=19120.166015625     |
| node_92: feature_name=a-HuIgG_0.03                      | feature_id[14].value <= threshold=19665.666015625   |
| node_93: feature_name=SARS.CoV.2.Spike.RBD.His.HEK      | feature_id[4].value > threshold=3.0166666507720947  |
| node_105: feature_name=SARS.CoV.2.S1.mFcTag             | feature_id[0].value <= threshold=54010.166015625    |
| node_106: feature_name=SARS.CoV.2.S1+S2                 | feature_id[7].value <= threshold=48317.708984375    |
| node_107: feature_name=a-HuIgG_0.03                     | feature_id[14].value <= threshold=12099.83349609375 |
| node_108: feature_name=SARS.CoV.2.Spike.RBD.His.Bac     | feature_id[3].value > threshold=23841.4169921875    |
| node_118: feature_name=SARS.CoV.2.Spike.RBD.rFc         | feature_id[5].value > threshold=34554.69140625      |
| node_120: feature_name=SARS.CoV.2.S1                    | feature_id[6].value <= threshold=36508.716796875    |
| node_121: feature_name=HuIgG_0.10                       | feature_id[9].value <= threshold=24763.3330078125   |
| node_122: feature_name=SARS.CoV.2.Spike.RBD.rFc         | feature_id[5].value <= threshold=42966.541015625    |
| node_123: feature_name=SARS.CoV.2.S1+S2                 | feature_id[7].value <= threshold=43434.54296875     |
| node_124: feature_name=SARS.CoV.2.S1+S2                 | feature_id[7].value > threshold=42800.94140625      |
| Class: healthcare workers 60–180 days after vaccination |                                                     |
|                                                         |                                                     |
| Rules_58                                                | passed counts:6                                     |
| node_0: feature_name=HuIgG_0.10                         | feature_id[9].value <= threshold=19120.166015625    |
| node_1: feature_name=SARS.CoV.2.S1.RBD.mFc              | feature_id[1].value <= threshold=3773.8334350585938 |
| node_2: feature_name=SARS.CoV.2.S1.HisTag               | feature_id[2].value > threshold=-383.86944580078125 |
| node_4: feature_name=SARS.CoV.2.S1                      | feature_id[6].value <= threshold=435.629638671875   |
| node_5: feature_name=SARS.CoV.2.S1                      | feature_id[6].value <= threshold=410.7962951660156  |
| Class: unvaccinated healthcare workers                  |                                                     |
|                                                         |                                                     |
| Rules_59                                                | passed counts:5                                     |



|                                                            |                                                      |
|------------------------------------------------------------|------------------------------------------------------|
| node_0: feature_name=HuIgG_0.10                            | feature_id[9].value > threshold=19120.166015625      |
| node_92: feature_name=a-HuIgG_0.03                         | feature_id[14].value <= threshold=19665.666015625    |
| node_93: feature_name=SARS.CoV.2.Spike.RBD.His.HEK         | feature_id[4].value > threshold=3.0166666507720947   |
| node_105: feature_name=SARS.CoV.2.S1.mFcTag                | feature_id[0].value > threshold=54010.166015625      |
| node_305: feature_name=a-MoIgG_0.10                        | feature_id[16].value > threshold=2382.8333740234375  |
| node_309: feature_name=SARS.CoV.S1.HisTag                  | feature_id[15].value > threshold=23460.3330078125    |
| node_365: feature_name=a-HuIgG_0.03                        | feature_id[14].value > threshold=11128.66650390625   |
| node_367: feature_name=SARS.CoV.2.S1.mFcTag                | feature_id[0].value > threshold=54294.0              |
| node_371: feature_name=SARS.CoV.2.S1.mFcTag                | feature_id[0].value <= threshold=55620.833984375     |
| node_372: feature_name=a-HuIgG_0.10                        | feature_id[13].value > threshold=28320.6669921875    |
| node_374: feature_name=SARS.CoV.2.S1                       | feature_id[6].value > threshold=47335.5              |
| node_376: feature_name=SARS.CoV.2.S1+S2                    | feature_id[7].value > threshold=54353.83203125       |
| node_378: feature_name=SARS.CoV.2.S1+S2                    | feature_id[7].value > threshold=54529.3828125        |
| Class: healthcare workers within 60 days after vaccination |                                                      |
|                                                            |                                                      |
| Rules_60                                                   | passed counts:5                                      |
| node_0: feature_name=HuIgG_0.10                            | feature_id[9].value > threshold=19120.166015625      |
| node_92: feature_name=a-HuIgG_0.03                         | feature_id[14].value <= threshold=19665.666015625    |
| node_93: feature_name=SARS.CoV.2.Spike.RBD.His.HEK         | feature_id[4].value > threshold=3.0166666507720947   |
| node_105: feature_name=SARS.CoV.2.S1.mFcTag                | feature_id[0].value > threshold=54010.166015625      |
| node_305: feature_name=a-MoIgG_0.10                        | feature_id[16].value <= threshold=2382.8333740234375 |
| node_306: feature_name=SARS.CoV.2.S1                       | feature_id[6].value > threshold=34987.400390625      |
| Class: healthcare workers over 180 days after vaccination  |                                                      |
|                                                            |                                                      |
| Rules_61                                                   | passed counts:5                                      |

|                                                         |                                                     |
|---------------------------------------------------------|-----------------------------------------------------|
| node_0: feature_name=HuIgG_0.10                         | feature_id[9].value > threshold=19120.166015625     |
| node_92: feature_name=a-HuIgG_0.03                      | feature_id[14].value <= threshold=19665.666015625   |
| node_93: feature_name=SARS.CoV.2.Spike.RBD.His.HEK      | feature_id[4].value > threshold=3.0166666507720947  |
| node_105: feature_name=SARS.CoV.2.S1.mFcTag             | feature_id[0].value <= threshold=54010.166015625    |
| node_106: feature_name=SARS.CoV.2.S1+S2                 | feature_id[7].value <= threshold=48317.708984375    |
| node_107: feature_name=a-HuIgG_0.03                     | feature_id[14].value <= threshold=12099.83349609375 |
| node_108: feature_name=SARS.CoV.2.Spike.RBD.His.Bac     | feature_id[3].value > threshold=23841.4169921875    |
| node_118: feature_name=SARS.CoV.2.Spike.RBD.rFc         | feature_id[5].value > threshold=34554.69140625      |
| node_120: feature_name=SARS.CoV.2.S1                    | feature_id[6].value <= threshold=36508.716796875    |
| node_121: feature_name=HuIgG_0.10                       | feature_id[9].value <= threshold=24763.3330078125   |
| node_122: feature_name=SARS.CoV.2.Spike.RBD.rFc         | feature_id[5].value <= threshold=42966.541015625    |
| node_123: feature_name=SARS.CoV.2.S1+S2                 | feature_id[7].value <= threshold=43434.54296875     |
| node_124: feature_name=SARS.CoV.2.S1+S2                 | feature_id[7].value <= threshold=42800.94140625     |
| node_125: feature_name=SARS.CoV.2.S1.mFcTag             | feature_id[0].value <= threshold=47427.1328125      |
| node_126: feature_name=SARS.CoV.2.Spike.RBD.rFc         | feature_id[5].value <= threshold=37955.708984375    |
| Class: healthcare workers 60–180 days after vaccination |                                                     |
|                                                         |                                                     |
| Rules_62                                                | passed counts:5                                     |
| node_0: feature_name=HuIgG_0.10                         | feature_id[9].value > threshold=19120.166015625     |
| node_92: feature_name=a-HuIgG_0.03                      | feature_id[14].value <= threshold=19665.666015625   |
| node_93: feature_name=SARS.CoV.2.Spike.RBD.His.HEK      | feature_id[4].value > threshold=3.0166666507720947  |
| node_105: feature_name=SARS.CoV.2.S1.mFcTag             | feature_id[0].value <= threshold=54010.166015625    |
| node_106: feature_name=SARS.CoV.2.S1+S2                 | feature_id[7].value <= threshold=48317.708984375    |
| node_107: feature_name=a-HuIgG_0.03                     | feature_id[14].value <= threshold=12099.83349609375 |
| node_108: feature_name=SARS.CoV.2.Spike.RBD.His.Bac     | feature_id[3].value <= threshold=23841.4169921875   |

|                                                           |                                                     |
|-----------------------------------------------------------|-----------------------------------------------------|
| node_109: feature_name=SARS.CoV.2.S1+S2                   | feature_id[7].value <= threshold=36783.25           |
| node_110: feature_name=SARS.CoV.2.S1                      | feature_id[6].value > threshold=26291.7998046875    |
| Class: healthcare workers 60–180 days after vaccination   |                                                     |
|                                                           |                                                     |
| Rules_63                                                  | passed counts:5                                     |
| node_0: feature_name=HuIgG_0.10                           | feature_id[9].value <= threshold=19120.166015625    |
| node_1: feature_name=SARS.CoV.2.S1.RBD.mFc                | feature_id[1].value > threshold=3773.8334350585938  |
| node_9: feature_name=a-HuIgG_0.30                         | feature_id[11].value <= threshold=33726.833984375   |
| node_10: feature_name=HuIgG_0.03                          | feature_id[8].value <= threshold=1023.1666564941406 |
| node_11: feature_name=SARS.CoV.2.S1.mFcTag                | feature_id[0].value > threshold=34194.916015625     |
| node_17: feature_name=HuIgG_0.10                          | feature_id[9].value > threshold=7582.83349609375    |
| Class: healthcare workers over 180 days after vaccination |                                                     |
|                                                           |                                                     |
| Rules_64                                                  | passed counts:4                                     |
| node_0: feature_name=HuIgG_0.10                           | feature_id[9].value > threshold=19120.166015625     |
| node_92: feature_name=a-HuIgG_0.03                        | feature_id[14].value <= threshold=19665.666015625   |
| node_93: feature_name=SARS.CoV.2.Spike.RBD.His.HEK        | feature_id[4].value > threshold=3.0166666507720947  |
| node_105: feature_name=SARS.CoV.2.S1.mFcTag               | feature_id[0].value > threshold=54010.166015625     |
| node_305: feature_name=a-MoIgG_0.10                       | feature_id[16].value > threshold=2382.8333740234375 |
| node_309: feature_name=SARS.CoV.S1.HisTag                 | feature_id[15].value <= threshold=23460.3330078125  |
| node_310: feature_name=HuIgG_0.03                         | feature_id[8].value <= threshold=6941.33349609375   |
| node_311: feature_name=a-HuIgG_0.10                       | feature_id[13].value > threshold=32620.5            |
| node_351: feature_name=SARS.CoV.S1.RBD.HisTag             | feature_id[10].value <= threshold=13834.0           |
| node_352: feature_name=SARS.CoV.2.S1                      | feature_id[6].value > threshold=47365.833984375     |
| Class: healthcare workers 60–180 days after vaccination   |                                                     |

|                                                            |                                                     |
|------------------------------------------------------------|-----------------------------------------------------|
|                                                            |                                                     |
| Rules_65                                                   | passed counts:4                                     |
| node_0: feature_name=HuIgG_0.10                            | feature_id[9].value > threshold=19120.166015625     |
| node_92: feature_name=a-HuIgG_0.03                         | feature_id[14].value <= threshold=19665.666015625   |
| node_93: feature_name=SARS.CoV.2.Spike.RBD.His.HEK         | feature_id[4].value > threshold=3.0166666507720947  |
| node_105: feature_name=SARS.CoV.2.S1.mFcTag                | feature_id[0].value > threshold=54010.166015625     |
| node_305: feature_name=a-MoIgG_0.10                        | feature_id[16].value > threshold=2382.8333740234375 |
| node_309: feature_name=SARS.CoV.S1.HisTag                  | feature_id[15].value <= threshold=23460.3330078125  |
| node_310: feature_name=HuIgG_0.03                          | feature_id[8].value <= threshold=6941.33349609375   |
| node_311: feature_name=a-HuIgG_0.10                        | feature_id[13].value > threshold=32620.5            |
| node_351: feature_name=SARS.CoV.S1.RBD.HisTag              | feature_id[10].value <= threshold=13834.0           |
| node_352: feature_name=SARS.CoV.2.S1                       | feature_id[6].value <= threshold=47365.833984375    |
| node_353: feature_name=SARS.CoV.2.Spike.RBD.His.HEK        | feature_id[4].value > threshold=29192.4169921875    |
| Class: healthcare workers within 60 days after vaccination |                                                     |
|                                                            |                                                     |
| Rules_66                                                   | passed counts:4                                     |
| node_0: feature_name=HuIgG_0.10                            | feature_id[9].value > threshold=19120.166015625     |
| node_92: feature_name=a-HuIgG_0.03                         | feature_id[14].value <= threshold=19665.666015625   |
| node_93: feature_name=SARS.CoV.2.Spike.RBD.His.HEK         | feature_id[4].value > threshold=3.0166666507720947  |
| node_105: feature_name=SARS.CoV.2.S1.mFcTag                | feature_id[0].value > threshold=54010.166015625     |
| node_305: feature_name=a-MoIgG_0.10                        | feature_id[16].value > threshold=2382.8333740234375 |
| node_309: feature_name=SARS.CoV.S1.HisTag                  | feature_id[15].value <= threshold=23460.3330078125  |
| node_310: feature_name=HuIgG_0.03                          | feature_id[8].value <= threshold=6941.33349609375   |
| node_311: feature_name=a-HuIgG_0.10                        | feature_id[13].value <= threshold=32620.5           |
| node_312: feature_name=SARS.CoV.2.Spike.RBD.His.Bac        | feature_id[3].value > threshold=31266.0             |

|                                                            |                                                     |
|------------------------------------------------------------|-----------------------------------------------------|
| node_320: feature_name=a-HuIgG_0.30                        | feature_id[11].value <= threshold=47574.66796875    |
| node_321: feature_name=SARS.CoV.2.S1.RBD.mFc               | feature_id[1].value > threshold=47171.166015625     |
| node_323: feature_name=SARS.CoV.2.Spike.RBD.His.Bac        | feature_id[3].value > threshold=32929.0             |
| node_325: feature_name=SARS.CoV.2.Spike.RBD.His.Bac        | feature_id[3].value > threshold=37127.798828125     |
| node_333: feature_name=a-HuIgG_0.10                        | feature_id[13].value <= threshold=30243.0           |
| node_334: feature_name=HuIgG_0.10                          | feature_id[9].value > threshold=22263.333984375     |
| Class: healthcare workers within 60 days after vaccination |                                                     |
|                                                            |                                                     |
| Rules_67                                                   | passed counts:4                                     |
| node_0: feature_name=HuIgG_0.10                            | feature_id[9].value > threshold=19120.166015625     |
| node_92: feature_name=a-HuIgG_0.03                         | feature_id[14].value <= threshold=19665.666015625   |
| node_93: feature_name=SARS.CoV.2.Spike.RBD.His.HEK         | feature_id[4].value > threshold=3.0166666507720947  |
| node_105: feature_name=SARS.CoV.2.S1.mFcTag                | feature_id[0].value > threshold=54010.166015625     |
| node_305: feature_name=a-MoIgG_0.10                        | feature_id[16].value > threshold=2382.8333740234375 |
| node_309: feature_name=SARS.CoV.S1.HisTag                  | feature_id[15].value <= threshold=23460.3330078125  |
| node_310: feature_name=HuIgG_0.03                          | feature_id[8].value <= threshold=6941.33349609375   |
| node_311: feature_name=a-HuIgG_0.10                        | feature_id[13].value <= threshold=32620.5           |
| node_312: feature_name=SARS.CoV.2.Spike.RBD.His.Bac        | feature_id[3].value > threshold=31266.0             |
| node_320: feature_name=a-HuIgG_0.30                        | feature_id[11].value <= threshold=47574.66796875    |
| node_321: feature_name=SARS.CoV.2.S1.RBD.mFc               | feature_id[1].value > threshold=47171.166015625     |
| node_323: feature_name=SARS.CoV.2.Spike.RBD.His.Bac        | feature_id[3].value <= threshold=32929.0            |
| Class: healthcare workers 60–180 days after vaccination    |                                                     |
|                                                            |                                                     |
| Rules_68                                                   | passed counts:4                                     |
| node_0: feature_name=HuIgG_0.10                            | feature_id[9].value > threshold=19120.166015625     |

|                                                         |                                                     |
|---------------------------------------------------------|-----------------------------------------------------|
| node_92: feature_name=a-HuIgG_0.03                      | feature_id[14].value <= threshold=19665.666015625   |
| node_93: feature_name=SARS.CoV.2.Spike.RBD.His.HEK      | feature_id[4].value > threshold=3.0166666507720947  |
| node_105: feature_name=SARS.CoV.2.S1.mFcTag             | feature_id[0].value > threshold=54010.166015625     |
| node_305: feature_name=a-MoIgG_0.10                     | feature_id[16].value > threshold=2382.8333740234375 |
| node_309: feature_name=SARS.CoV.S1.HisTag               | feature_id[15].value <= threshold=23460.3330078125  |
| node_310: feature_name=HuIgG_0.03                       | feature_id[8].value <= threshold=6941.33349609375   |
| node_311: feature_name=a-HuIgG_0.10                     | feature_id[13].value <= threshold=32620.5           |
| node_312: feature_name=SARS.CoV.2.Spike.RBD.His.Bac     | feature_id[3].value <= threshold=31266.0            |
| node_313: feature_name=HuIgG_0.10                       | feature_id[9].value <= threshold=22308.5            |
| node_314: feature_name=a-MoIgG_0.10                     | feature_id[16].value <= threshold=7511.833251953125 |
| Class: healthcare workers 60–180 days after vaccination |                                                     |
|                                                         |                                                     |
| Rules_69                                                | passed counts:4                                     |
| node_0: feature_name=HuIgG_0.10                         | feature_id[9].value > threshold=19120.166015625     |
| node_92: feature_name=a-HuIgG_0.03                      | feature_id[14].value <= threshold=19665.666015625   |
| node_93: feature_name=SARS.CoV.2.Spike.RBD.His.HEK      | feature_id[4].value > threshold=3.0166666507720947  |
| node_105: feature_name=SARS.CoV.2.S1.mFcTag             | feature_id[0].value <= threshold=54010.166015625    |
| node_106: feature_name=SARS.CoV.2.S1+S2                 | feature_id[7].value > threshold=48317.708984375     |
| node_228: feature_name=a-MoIgG_0.10                     | feature_id[16].value > threshold=1652.5             |
| node_230: feature_name=HuIgG_0.10                       | feature_id[9].value <= threshold=30107.666015625    |
| node_231: feature_name=HuIgG_0.03                       | feature_id[8].value > threshold=5533.83349609375    |
| node_247: feature_name=HuIgG_0.10                       | feature_id[9].value > threshold=24231.0             |
| node_261: feature_name=SARS.CoV.S1.RBD.HisTag           | feature_id[10].value <= threshold=24179.0419921875  |
| node_262: feature_name=HuIgG_0.10                       | feature_id[9].value > threshold=25555.333984375     |
| node_266: feature_name=HuIgG_0.10                       | feature_id[9].value > threshold=25659.6669921875    |

|                                                            |                                                    |
|------------------------------------------------------------|----------------------------------------------------|
| node_270: feature_name=SARS.CoV.S1.HisTag                  | feature_id[15].value <= threshold=10000.5830078125 |
| node_271: feature_name=SARS.CoV.2.Spike.RBD.His.Bac        | feature_id[3].value <= threshold=29395.400390625   |
| node_272: feature_name=SARS.CoV.2.S1.HisTag                | feature_id[2].value <= threshold=40026.783203125   |
| Class: healthcare workers within 60 days after vaccination |                                                    |
|                                                            |                                                    |
| Rules_70                                                   | passed counts:4                                    |
| node_0: feature_name=HuIgG_0.10                            | feature_id[9].value > threshold=19120.166015625    |
| node_92: feature_name=a-HuIgG_0.03                         | feature_id[14].value <= threshold=19665.666015625  |
| node_93: feature_name=SARS.CoV.2.Spike.RBD.His.HEK         | feature_id[4].value > threshold=3.0166666507720947 |
| node_105: feature_name=SARS.CoV.2.S1.mFcTag                | feature_id[0].value <= threshold=54010.166015625   |
| node_106: feature_name=SARS.CoV.2.S1+S2                    | feature_id[7].value <= threshold=48317.708984375   |
| node_107: feature_name=a-HuIgG_0.03                        | feature_id[14].value > threshold=12099.83349609375 |
| node_155: feature_name=SARS.CoV.2.Spike.RBD.His.Bac        | feature_id[3].value > threshold=18979.9912109375   |
| node_167: feature_name=a-MoIgG_0.10                        | feature_id[16].value > threshold=4979.5            |
| node_201: feature_name=HuIgG_0.10                          | feature_id[9].value <= threshold=26006.0           |
| node_202: feature_name=HuIgG_0.03                          | feature_id[8].value <= threshold=6080.0            |
| node_203: feature_name=SARS.CoV.2.S1.HisTag                | feature_id[2].value > threshold=38575.359375       |
| node_213: feature_name=SARS.CoV.2.Spike.RBD.His.HEK        | feature_id[4].value <= threshold=39411.75          |
| Class: healthcare workers 60–180 days after vaccination    |                                                    |
|                                                            |                                                    |
| Rules_71                                                   | passed counts:4                                    |
| node_0: feature_name=HuIgG_0.10                            | feature_id[9].value <= threshold=19120.166015625   |
| node_1: feature_name=SARS.CoV.2.S1.RBD.mFc                 | feature_id[1].value > threshold=3773.8334350585938 |
| node_9: feature_name=a-HuIgG_0.30                          | feature_id[11].value > threshold=33726.833984375   |
| node_47: feature_name=SARS.CoV.2.S1.mFcTag                 | feature_id[0].value > threshold=43185.68359375     |

|                                                         |                                                    |
|---------------------------------------------------------|----------------------------------------------------|
| node_57: feature_name=a-HuIgG_0.03                      | feature_id[14].value > threshold=10858.0           |
| node_71: feature_name=HuIgG_0.03                        | feature_id[8].value <= threshold=3796.0            |
| node_72: feature_name=SARS.CoV.2.S1.mFcTag              | feature_id[0].value > threshold=55206.517578125    |
| Class: healthcare workers 60–180 days after vaccination |                                                    |
|                                                         |                                                    |
| Rules_72                                                | passed counts:4                                    |
| node_0: feature_name=HuIgG_0.10                         | feature_id[9].value <= threshold=19120.166015625   |
| node_1: feature_name=SARS.CoV.2.S1.RBD.mFc              | feature_id[1].value > threshold=3773.8334350585938 |
| node_9: feature_name=a-HuIgG_0.30                       | feature_id[11].value > threshold=33726.833984375   |
| node_47: feature_name=SARS.CoV.2.S1.mFcTag              | feature_id[0].value > threshold=43185.68359375     |
| node_57: feature_name=a-HuIgG_0.03                      | feature_id[14].value <= threshold=10858.0          |
| node_58: feature_name=HuIgG_0.30                        | feature_id[12].value <= threshold=36767.33203125   |
| node_59: feature_name=a-HuIgG_0.10                      | feature_id[13].value > threshold=21868.0           |
| node_61: feature_name=a-HuIgG_0.03                      | feature_id[14].value > threshold=10179.0           |
| node_65: feature_name=SARS.CoV.2.S1                     | feature_id[6].value > threshold=34029.666015625    |
| node_67: feature_name=HuIgG_0.10                        | feature_id[9].value <= threshold=18956.5           |
| Class: healthcare workers 60–180 days after vaccination |                                                    |
|                                                         |                                                    |
| Rules_73                                                | passed counts:4                                    |
| node_0: feature_name=HuIgG_0.10                         | feature_id[9].value <= threshold=19120.166015625   |
| node_1: feature_name=SARS.CoV.2.S1.RBD.mFc              | feature_id[1].value > threshold=3773.8334350585938 |
| node_9: feature_name=a-HuIgG_0.30                       | feature_id[11].value <= threshold=33726.833984375  |
| node_10: feature_name=HuIgG_0.03                        | feature_id[8].value > threshold=1023.1666564941406 |
| node_20: feature_name=SARS.CoV.S1.HisTag                | feature_id[15].value > threshold=400.3000030517578 |
| node_24: feature_name=SARS.CoV.2.Spike.RBD.His.Bac      | feature_id[3].value > threshold=36933.69921875     |



|                                                           |                                                     |
|-----------------------------------------------------------|-----------------------------------------------------|
| node_44: feature_name=SARS.CoV.2.Spike.RBD.His.Bac        | feature_id[3].value > threshold=38377.58203125      |
| Class: healthcare workers 60–180 days after vaccination   |                                                     |
|                                                           |                                                     |
| Rules_74                                                  | passed counts:4                                     |
| node_0: feature_name=HuIgG_0.10                           | feature_id[9].value <= threshold=19120.166015625    |
| node_1: feature_name=SARS.CoV.2.S1.RBD.mFc                | feature_id[1].value > threshold=3773.8334350585938  |
| node_9: feature_name=a-HuIgG_0.30                         | feature_id[11].value <= threshold=33726.833984375   |
| node_10: feature_name=HuIgG_0.03                          | feature_id[8].value > threshold=1023.1666564941406  |
| node_20: feature_name=SARS.CoV.S1.HisTag                  | feature_id[15].value > threshold=400.3000030517578  |
| node_24: feature_name=SARS.CoV.2.Spike.RBD.His.Bac        | feature_id[3].value <= threshold=36933.69921875     |
| node_25: feature_name=SARS.CoV.2.S1.RBD.mFc               | feature_id[1].value > threshold=40856.734375        |
| node_41: feature_name=SARS.CoV.2.S1+S2                    | feature_id[7].value <= threshold=36853.75           |
| Class: healthcare workers over 180 days after vaccination |                                                     |
|                                                           |                                                     |
| Rules_75                                                  | passed counts:4                                     |
| node_0: feature_name=HuIgG_0.10                           | feature_id[9].value <= threshold=19120.166015625    |
| node_1: feature_name=SARS.CoV.2.S1.RBD.mFc                | feature_id[1].value > threshold=3773.8334350585938  |
| node_9: feature_name=a-HuIgG_0.30                         | feature_id[11].value <= threshold=33726.833984375   |
| node_10: feature_name=HuIgG_0.03                          | feature_id[8].value > threshold=1023.1666564941406  |
| node_20: feature_name=SARS.CoV.S1.HisTag                  | feature_id[15].value > threshold=400.3000030517578  |
| node_24: feature_name=SARS.CoV.2.Spike.RBD.His.Bac        | feature_id[3].value <= threshold=36933.69921875     |
| node_25: feature_name=SARS.CoV.2.S1.RBD.mFc               | feature_id[1].value <= threshold=40856.734375       |
| node_26: feature_name=SARS.CoV.S1.HisTag                  | feature_id[15].value <= threshold=15087.41650390625 |
| node_27: feature_name=SARS.CoV.2.Spike.RBD.His.HEK        | feature_id[4].value <= threshold=10178.375          |
| node_28: feature_name=SARS.CoV.2.S1.RBD.mFc               | feature_id[1].value > threshold=33458.650390625     |

|                                                            |                                                    |
|------------------------------------------------------------|----------------------------------------------------|
| Class: healthcare workers over 180 days after vaccination  |                                                    |
|                                                            |                                                    |
| Rules_76                                                   | passed counts:3                                    |
| node_0: feature_name=HuIgG_0.10                            | feature_id[9].value > threshold=19120.166015625    |
| node_92: feature_name=a-HuIgG_0.03                         | feature_id[14].value > threshold=19665.666015625   |
| node_382: feature_name=a-MoIgG_0.10                        | feature_id[16].value > threshold=20281.6669921875  |
| Class: healthcare workers within 60 days after vaccination |                                                    |
|                                                            |                                                    |
| Rules_77                                                   | passed counts:3                                    |
| node_0: feature_name=HuIgG_0.10                            | feature_id[9].value > threshold=19120.166015625    |
| node_92: feature_name=a-HuIgG_0.03                         | feature_id[14].value > threshold=19665.666015625   |
| node_382: feature_name=a-MoIgG_0.10                        | feature_id[16].value <= threshold=20281.6669921875 |
| node_383: feature_name=a-HuIgG_0.10                        | feature_id[13].value > threshold=33917.66796875    |
| node_391: feature_name=HuIgG_0.10                          | feature_id[9].value > threshold=25959.0            |
| node_393: feature_name=HuIgG_0.30                          | feature_id[12].value > threshold=52448.166015625   |
| Class: healthcare workers over 180 days after vaccination  |                                                    |
|                                                            |                                                    |
| Rules_78                                                   | passed counts:3                                    |
| node_0: feature_name=HuIgG_0.10                            | feature_id[9].value > threshold=19120.166015625    |
| node_92: feature_name=a-HuIgG_0.03                         | feature_id[14].value > threshold=19665.666015625   |
| node_382: feature_name=a-MoIgG_0.10                        | feature_id[16].value <= threshold=20281.6669921875 |
| node_383: feature_name=a-HuIgG_0.10                        | feature_id[13].value <= threshold=33917.66796875   |
| node_384: feature_name=SARS.CoV.2.S1.mFcTag                | feature_id[0].value <= threshold=52180.75          |
| node_385: feature_name=SARS.CoV.S1.HisTag                  | feature_id[15].value > threshold=6022.0166015625   |
| Class: healthcare workers over 180 days after vaccination  |                                                    |

|                                                         |                                                     |
|---------------------------------------------------------|-----------------------------------------------------|
| Rules_79                                                | passed counts:3                                     |
| node_0: feature_name=HuIgG_0.10                         | feature_id[9].value > threshold=19120.166015625     |
| node_92: feature_name=a-HuIgG_0.03                      | feature_id[14].value <= threshold=19665.666015625   |
| node_93: feature_name=SARS.CoV.2.Spike.RBD.His.HEK      | feature_id[4].value > threshold=3.0166666507720947  |
| node_105: feature_name=SARS.CoV.2.S1.mFcTag             | feature_id[0].value > threshold=54010.166015625     |
| node_305: feature_name=a-MoIgG_0.10                     | feature_id[16].value > threshold=2382.8333740234375 |
| node_309: feature_name=SARS.CoV.S1.HisTag               | feature_id[15].value > threshold=23460.3330078125   |
| node_365: feature_name=a-HuIgG_0.03                     | feature_id[14].value > threshold=11128.66650390625  |
| node_367: feature_name=SARS.CoV.2.S1.mFcTag             | feature_id[0].value <= threshold=54294.0            |
| node_368: feature_name=SARS.CoV.2.Spike.RBD.His.HEK     | feature_id[4].value > threshold=48797.25            |
| Class: healthcare workers 60–180 days after vaccination |                                                     |
| Rules_80                                                | passed counts:3                                     |
| node_0: feature_name=HuIgG_0.10                         | feature_id[9].value > threshold=19120.166015625     |
| node_92: feature_name=a-HuIgG_0.03                      | feature_id[14].value <= threshold=19665.666015625   |
| node_93: feature_name=SARS.CoV.2.Spike.RBD.His.HEK      | feature_id[4].value > threshold=3.0166666507720947  |
| node_105: feature_name=SARS.CoV.2.S1.mFcTag             | feature_id[0].value > threshold=54010.166015625     |
| node_305: feature_name=a-MoIgG_0.10                     | feature_id[16].value > threshold=2382.8333740234375 |
| node_309: feature_name=SARS.CoV.S1.HisTag               | feature_id[15].value <= threshold=23460.3330078125  |
| node_310: feature_name=HuIgG_0.03                       | feature_id[8].value <= threshold=6941.33349609375   |
| node_311: feature_name=a-HuIgG_0.10                     | feature_id[13].value <= threshold=32620.5           |
| node_312: feature_name=SARS.CoV.2.Spike.RBD.His.Bac     | feature_id[3].value > threshold=31266.0             |
| node_320: feature_name=a-HuIgG_0.30                     | feature_id[11].value <= threshold=47574.66796875    |
| node_321: feature_name=SARS.CoV.2.S1.RBD.mFc            | feature_id[1].value > threshold=47171.166015625     |

|                                                         |                                                     |
|---------------------------------------------------------|-----------------------------------------------------|
| node_323: feature_name=SARS.CoV.2.Spike.RBD.His.Bac     | feature_id[3].value > threshold=32929.0             |
| node_325: feature_name=SARS.CoV.2.Spike.RBD.His.Bac     | feature_id[3].value > threshold=37127.798828125     |
| node_333: feature_name=a-HuIgG_0.10                     | feature_id[13].value <= threshold=30243.0           |
| node_334: feature_name=HuIgG_0.10                       | feature_id[9].value <= threshold=22263.333984375    |
| node_335: feature_name=a-MoIgG_0.10                     | feature_id[16].value > threshold=4199.8333740234375 |
| Class: healthcare workers 60–180 days after vaccination |                                                     |
|                                                         |                                                     |
| Rules_81                                                | passed counts:3                                     |
| node_0: feature_name=HuIgG_0.10                         | feature_id[9].value > threshold=19120.166015625     |
| node_92: feature_name=a-HuIgG_0.03                      | feature_id[14].value <= threshold=19665.666015625   |
| node_93: feature_name=SARS.CoV.2.Spike.RBD.His.HEK      | feature_id[4].value > threshold=3.0166666507720947  |
| node_105: feature_name=SARS.CoV.2.S1.mFcTag             | feature_id[0].value <= threshold=54010.166015625    |
| node_106: feature_name=SARS.CoV.2.S1+S2                 | feature_id[7].value > threshold=48317.708984375     |
| node_228: feature_name=a-MoIgG_0.10                     | feature_id[16].value > threshold=1652.5             |
| node_230: feature_name=HuIgG_0.10                       | feature_id[9].value <= threshold=30107.666015625    |
| node_231: feature_name=HuIgG_0.03                       | feature_id[8].value > threshold=5533.83349609375    |
| node_247: feature_name=HuIgG_0.10                       | feature_id[9].value > threshold=24231.0             |
| node_261: feature_name=SARS.CoV.S1.RBD.HisTag           | feature_id[10].value <= threshold=24179.0419921875  |
| node_262: feature_name=HuIgG_0.10                       | feature_id[9].value > threshold=25555.333984375     |
| node_266: feature_name=HuIgG_0.10                       | feature_id[9].value > threshold=25659.6669921875    |
| node_270: feature_name=SARS.CoV.S1.HisTag               | feature_id[15].value > threshold=10000.5830078125   |
| node_276: feature_name=SARS.CoV.S1.HisTag               | feature_id[15].value > threshold=13228.125          |
| node_286: feature_name=a-MoIgG_0.10                     | feature_id[16].value > threshold=10763.83349609375  |
| node_290: feature_name=HuIgG_0.10                       | feature_id[9].value <= threshold=27228.1669921875   |
| Class: healthcare workers 60–180 days after vaccination |                                                     |

|                                                         |                                                    |
|---------------------------------------------------------|----------------------------------------------------|
|                                                         |                                                    |
| Rules_82                                                | passed counts:3                                    |
| node_0: feature_name=HuIgG_0.10                         | feature_id[9].value > threshold=19120.166015625    |
| node_92: feature_name=a-HuIgG_0.03                      | feature_id[14].value <= threshold=19665.666015625  |
| node_93: feature_name=SARS.CoV.2.Spike.RBD.His.HEK      | feature_id[4].value > threshold=3.0166666507720947 |
| node_105: feature_name=SARS.CoV.2.S1.mFcTag             | feature_id[0].value <= threshold=54010.166015625   |
| node_106: feature_name=SARS.CoV.2.S1+S2                 | feature_id[7].value > threshold=48317.708984375    |
| node_228: feature_name=a-MoIgG_0.10                     | feature_id[16].value > threshold=1652.5            |
| node_230: feature_name=HuIgG_0.10                       | feature_id[9].value <= threshold=30107.666015625   |
| node_231: feature_name=HuIgG_0.03                       | feature_id[8].value > threshold=5533.83349609375   |
| node_247: feature_name=HuIgG_0.10                       | feature_id[9].value > threshold=24231.0            |
| node_261: feature_name=SARS.CoV.S1.RBD.HisTag           | feature_id[10].value <= threshold=24179.0419921875 |
| node_262: feature_name=HuIgG_0.10                       | feature_id[9].value > threshold=25555.333984375    |
| node_266: feature_name=HuIgG_0.10                       | feature_id[9].value > threshold=25659.6669921875   |
| node_270: feature_name=SARS.CoV.S1.HisTag               | feature_id[15].value <= threshold=10000.5830078125 |
| node_271: feature_name=SARS.CoV.2.Spike.RBD.His.Bac     | feature_id[3].value <= threshold=29395.400390625   |
| node_272: feature_name=SARS.CoV.2.S1.HisTag             | feature_id[2].value > threshold=40026.783203125    |
| Class: healthcare workers 60–180 days after vaccination |                                                    |
|                                                         |                                                    |
| Rules_83                                                | passed counts:3                                    |
| node_0: feature_name=HuIgG_0.10                         | feature_id[9].value > threshold=19120.166015625    |
| node_92: feature_name=a-HuIgG_0.03                      | feature_id[14].value <= threshold=19665.666015625  |
| node_93: feature_name=SARS.CoV.2.Spike.RBD.His.HEK      | feature_id[4].value > threshold=3.0166666507720947 |
| node_105: feature_name=SARS.CoV.2.S1.mFcTag             | feature_id[0].value <= threshold=54010.166015625   |
| node_106: feature_name=SARS.CoV.2.S1+S2                 | feature_id[7].value > threshold=48317.708984375    |

|                                                            |                                                     |
|------------------------------------------------------------|-----------------------------------------------------|
| node_228: feature_name=a-MoIgG_0.10                        | feature_id[16].value > threshold=1652.5             |
| node_230: feature_name=HuIgG_0.10                          | feature_id[9].value <= threshold=30107.666015625    |
| node_231: feature_name=HuIgG_0.03                          | feature_id[8].value > threshold=5533.83349609375    |
| node_247: feature_name=HuIgG_0.10                          | feature_id[9].value <= threshold=24231.0            |
| node_248: feature_name=SARS.CoV.2.S1.HisTag                | feature_id[2].value <= threshold=43585.92578125     |
| node_249: feature_name=HuIgG_0.10                          | feature_id[9].value <= threshold=23668.3330078125   |
| node_250: feature_name=SARS.CoV.2.S1+S2                    | feature_id[7].value <= threshold=49682.4921875      |
| Class: healthcare workers within 60 days after vaccination |                                                     |
|                                                            |                                                     |
| Rules_84                                                   | passed counts:3                                     |
| node_0: feature_name=HuIgG_0.10                            | feature_id[9].value > threshold=19120.166015625     |
| node_92: feature_name=a-HuIgG_0.03                         | feature_id[14].value <= threshold=19665.666015625   |
| node_93: feature_name=SARS.CoV.2.Spike.RBD.His.HEK         | feature_id[4].value > threshold=3.016666507720947   |
| node_105: feature_name=SARS.CoV.2.S1.mFcTag                | feature_id[0].value <= threshold=54010.166015625    |
| node_106: feature_name=SARS.CoV.2.S1+S2                    | feature_id[7].value > threshold=48317.708984375     |
| node_228: feature_name=a-MoIgG_0.10                        | feature_id[16].value > threshold=1652.5             |
| node_230: feature_name=HuIgG_0.10                          | feature_id[9].value <= threshold=30107.666015625    |
| node_231: feature_name=HuIgG_0.03                          | feature_id[8].value <= threshold=5533.83349609375   |
| node_232: feature_name=SARS.CoV.2.Spike.RBD.His.HEK        | feature_id[4].value > threshold=11116.333374023438  |
| node_234: feature_name=SARS.CoV.2.S1+S2                    | feature_id[7].value > threshold=48882.58203125      |
| node_240: feature_name=a-HuIgG_0.03                        | feature_id[14].value <= threshold=10994.83349609375 |
| node_241: feature_name=a-HuIgG_0.30                        | feature_id[11].value > threshold=41039.83203125     |
| node_243: feature_name=SARS.CoV.2.Spike.RBD.rFc            | feature_id[5].value > threshold=48191.583984375     |
| Class: healthcare workers within 60 days after vaccination |                                                     |
|                                                            |                                                     |

|                                                         |                                                     |
|---------------------------------------------------------|-----------------------------------------------------|
| Rules_85                                                | passed counts:3                                     |
| node_0: feature_name=HuIgG_0.10                         | feature_id[9].value > threshold=19120.166015625     |
| node_92: feature_name=a-HuIgG_0.03                      | feature_id[14].value <= threshold=19665.666015625   |
| node_93: feature_name=SARS.CoV.2.Spike.RBD.His.HEK      | feature_id[4].value > threshold=3.0166666507720947  |
| node_105: feature_name=SARS.CoV.2.S1.mFcTag             | feature_id[0].value <= threshold=54010.166015625    |
| node_106: feature_name=SARS.CoV.2.S1+S2                 | feature_id[7].value > threshold=48317.708984375     |
| node_228: feature_name=a-MoIgG_0.10                     | feature_id[16].value > threshold=1652.5             |
| node_230: feature_name=HuIgG_0.10                       | feature_id[9].value <= threshold=30107.666015625    |
| node_231: feature_name=HuIgG_0.03                       | feature_id[8].value <= threshold=5533.83349609375   |
| node_232: feature_name=SARS.CoV.2.Spike.RBD.His.HEK     | feature_id[4].value > threshold=11116.333374023438  |
| node_234: feature_name=SARS.CoV.2.S1+S2                 | feature_id[7].value > threshold=48882.58203125      |
| node_240: feature_name=a-HuIgG_0.03                     | feature_id[14].value <= threshold=10994.83349609375 |
| node_241: feature_name=a-HuIgG_0.30                     | feature_id[11].value > threshold=41039.83203125     |
| node_243: feature_name=SARS.CoV.2.Spike.RBD.rFc         | feature_id[5].value <= threshold=48191.583984375    |
| Class: healthcare workers 60–180 days after vaccination |                                                     |
|                                                         |                                                     |
| Rules_86                                                | passed counts:3                                     |
| node_0: feature_name=HuIgG_0.10                         | feature_id[9].value > threshold=19120.166015625     |
| node_92: feature_name=a-HuIgG_0.03                      | feature_id[14].value <= threshold=19665.666015625   |
| node_93: feature_name=SARS.CoV.2.Spike.RBD.His.HEK      | feature_id[4].value > threshold=3.0166666507720947  |
| node_105: feature_name=SARS.CoV.2.S1.mFcTag             | feature_id[0].value <= threshold=54010.166015625    |
| node_106: feature_name=SARS.CoV.2.S1+S2                 | feature_id[7].value > threshold=48317.708984375     |
| node_228: feature_name=a-MoIgG_0.10                     | feature_id[16].value > threshold=1652.5             |
| node_230: feature_name=HuIgG_0.10                       | feature_id[9].value <= threshold=30107.666015625    |
| node_231: feature_name=HuIgG_0.03                       | feature_id[8].value <= threshold=5533.83349609375   |

|                                                            |                                                    |
|------------------------------------------------------------|----------------------------------------------------|
| node_232: feature_name=SARS.CoV.2.Spike.RBD.His.HEK        | feature_id[4].value > threshold=11116.333374023438 |
| node_234: feature_name=SARS.CoV.2.S1+S2                    | feature_id[7].value <= threshold=48882.58203125    |
| node_235: feature_name=SARS.CoV.2.Spike.RBD.rFc            | feature_id[5].value <= threshold=45170.75          |
| node_236: feature_name=a-HuIgG_0.03                        | feature_id[14].value > threshold=11110.0           |
| Class: healthcare workers 60–180 days after vaccination    |                                                    |
| Rules_87                                                   | passed counts:3                                    |
| node_0: feature_name=HuIgG_0.10                            | feature_id[9].value > threshold=19120.166015625    |
| node_92: feature_name=a-HuIgG_0.03                         | feature_id[14].value <= threshold=19665.666015625  |
| node_93: feature_name=SARS.CoV.2.Spike.RBD.His.HEK         | feature_id[4].value > threshold=3.0166666507720947 |
| node_105: feature_name=SARS.CoV.2.S1.mFcTag                | feature_id[0].value <= threshold=54010.166015625   |
| node_106: feature_name=SARS.CoV.2.S1+S2                    | feature_id[7].value <= threshold=48317.708984375   |
| node_107: feature_name=a-HuIgG_0.03                        | feature_id[14].value > threshold=12099.83349609375 |
| node_155: feature_name=SARS.CoV.2.Spike.RBD.His.Bac        | feature_id[3].value > threshold=18979.9912109375   |
| node_167: feature_name=a-MoIgG_0.10                        | feature_id[16].value <= threshold=4979.5           |
| node_168: feature_name=SARS.CoV.2.S1+S2                    | feature_id[7].value > threshold=36298.75           |
| node_172: feature_name=SARS.CoV.2.S1.RBD.mFc               | feature_id[1].value > threshold=40153.283203125    |
| node_182: feature_name=HuIgG_0.10                          | feature_id[9].value > threshold=21919.833984375    |
| node_186: feature_name=a-HuIgG_0.10                        | feature_id[13].value > threshold=28919.0           |
| node_192: feature_name=a-HuIgG_0.10                        | feature_id[13].value <= threshold=31482.6669921875 |
| node_193: feature_name=a-HuIgG_0.03                        | feature_id[14].value <= threshold=12541.0          |
| Class: healthcare workers within 60 days after vaccination |                                                    |
| Rules_88                                                   | passed counts:3                                    |
| node_0: feature_name=HuIgG_0.10                            | feature_id[9].value > threshold=19120.166015625    |



|                                                            |                                                     |
|------------------------------------------------------------|-----------------------------------------------------|
| node_92: feature_name=a-HuIgG_0.03                         | feature_id[14].value <= threshold=19665.666015625   |
| node_93: feature_name=SARS.CoV.2.Spike.RBD.His.HEK         | feature_id[4].value > threshold=3.0166666507720947  |
| node_105: feature_name=SARS.CoV.2.S1.mFcTag                | feature_id[0].value <= threshold=54010.166015625    |
| node_106: feature_name=SARS.CoV.2.S1+S2                    | feature_id[7].value <= threshold=48317.708984375    |
| node_107: feature_name=a-HuIgG_0.03                        | feature_id[14].value > threshold=12099.83349609375  |
| node_155: feature_name=SARS.CoV.2.Spike.RBD.His.Bac        | feature_id[3].value <= threshold=18979.9912109375   |
| node_156: feature_name=a-MoIgG_0.10                        | feature_id[16].value > threshold=1739.1666259765625 |
| node_160: feature_name=HuIgG_0.30                          | feature_id[12].value > threshold=34829.83203125     |
| node_162: feature_name=HuIgG_0.03                          | feature_id[8].value > threshold=6681.166748046875   |
| node_164: feature_name=HuIgG_0.30                          | feature_id[12].value <= threshold=40459.166015625   |
| Class: healthcare workers within 60 days after vaccination |                                                     |
|                                                            |                                                     |
| Rules_89                                                   | passed counts:3                                     |
| node_0: feature_name=HuIgG_0.10                            | feature_id[9].value > threshold=19120.166015625     |
| node_92: feature_name=a-HuIgG_0.03                         | feature_id[14].value <= threshold=19665.666015625   |
| node_93: feature_name=SARS.CoV.2.Spike.RBD.His.HEK         | feature_id[4].value > threshold=3.0166666507720947  |
| node_105: feature_name=SARS.CoV.2.S1.mFcTag                | feature_id[0].value <= threshold=54010.166015625    |
| node_106: feature_name=SARS.CoV.2.S1+S2                    | feature_id[7].value <= threshold=48317.708984375    |
| node_107: feature_name=a-HuIgG_0.03                        | feature_id[14].value <= threshold=12099.83349609375 |
| node_108: feature_name=SARS.CoV.2.Spike.RBD.His.Bac        | feature_id[3].value > threshold=23841.4169921875    |
| node_118: feature_name=SARS.CoV.2.Spike.RBD.rFc            | feature_id[5].value > threshold=34554.69140625      |
| node_120: feature_name=SARS.CoV.2.S1                       | feature_id[6].value > threshold=36508.716796875     |
| node_142: feature_name=HuIgG_0.30                          | feature_id[12].value > threshold=40622.83203125     |
| node_150: feature_name=SARS.CoV.S1.RBD.HisTag              | feature_id[10].value > threshold=9578.58349609375   |
| node_152: feature_name=SARS.CoV.2.Spike.RBD.His.Bac        | feature_id[3].value <= threshold=30984.7919921875   |

|                                                            |                                                     |
|------------------------------------------------------------|-----------------------------------------------------|
| Class: healthcare workers 60–180 days after vaccination    |                                                     |
|                                                            |                                                     |
| Rules_90                                                   | passed counts:3                                     |
| node_0: feature_name=HuIgG_0.10                            | feature_id[9].value > threshold=19120.166015625     |
| node_92: feature_name=a-HuIgG_0.03                         | feature_id[14].value <= threshold=19665.666015625   |
| node_93: feature_name=SARS.CoV.2.Spike.RBD.His.HEK         | feature_id[4].value > threshold=3.0166666507720947  |
| node_105: feature_name=SARS.CoV.2.S1.mFcTag                | feature_id[0].value <= threshold=54010.166015625    |
| node_106: feature_name=SARS.CoV.2.S1+S2                    | feature_id[7].value <= threshold=48317.708984375    |
| node_107: feature_name=a-HuIgG_0.03                        | feature_id[14].value <= threshold=12099.83349609375 |
| node_108: feature_name=SARS.CoV.2.Spike.RBD.His.Bac        | feature_id[3].value > threshold=23841.4169921875    |
| node_118: feature_name=SARS.CoV.2.Spike.RBD.rFc            | feature_id[5].value > threshold=34554.69140625      |
| node_120: feature_name=SARS.CoV.2.S1                       | feature_id[6].value > threshold=36508.716796875     |
| node_142: feature_name=HuIgG_0.30                          | feature_id[12].value <= threshold=40622.83203125    |
| node_143: feature_name=HuIgG_0.10                          | feature_id[9].value <= threshold=21439.1669921875   |
| node_144: feature_name=SARS.CoV.2.S1.mFcTag                | feature_id[0].value > threshold=51094.66796875      |
| node_146: feature_name=a-HuIgG_0.03                        | feature_id[14].value > threshold=9792.33349609375   |
| Class: healthcare workers 60–180 days after vaccination    |                                                     |
|                                                            |                                                     |
| Rules_91                                                   | passed counts:3                                     |
| node_0: feature_name=HuIgG_0.10                            | feature_id[9].value > threshold=19120.166015625     |
| node_92: feature_name=a-HuIgG_0.03                         | feature_id[14].value <= threshold=19665.666015625   |
| node_93: feature_name=SARS.CoV.2.Spike.RBD.His.HEK         | feature_id[4].value <= threshold=3.0166666507720947 |
| node_94: feature_name=SARS.CoV.2.Spike.RBD.His.Bac         | feature_id[3].value <= threshold=-51.85277557373047 |
| node_95: feature_name=SARS.CoV.2.S1.RBD.mFc                | feature_id[1].value <= threshold=-141.8333387374878 |
| Class: healthcare workers within 60 days after vaccination |                                                     |

|                                                            |                                                    |
|------------------------------------------------------------|----------------------------------------------------|
|                                                            |                                                    |
| Rules_92                                                   | passed counts:3                                    |
| node_0: feature_name=HuIgG_0.10                            | feature_id[9].value <= threshold=19120.166015625   |
| node_1: feature_name=SARS.CoV.2.S1.RBD.mFc                 | feature_id[1].value > threshold=3773.8334350585938 |
| node_9: feature_name=a-HuIgG_0.30                          | feature_id[11].value > threshold=33726.833984375   |
| node_47: feature_name=SARS.CoV.2.S1.mFcTag                 | feature_id[0].value > threshold=43185.68359375     |
| node_57: feature_name=a-HuIgG_0.03                         | feature_id[14].value > threshold=10858.0           |
| node_71: feature_name=HuIgG_0.03                           | feature_id[8].value > threshold=3796.0             |
| node_83: feature_name=SARS.CoV.2.S1+S2                     | feature_id[7].value > threshold=49967.91796875     |
| node_87: feature_name=HuIgG_0.10                           | feature_id[9].value <= threshold=18981.666015625   |
| Class: healthcare workers within 60 days after vaccination |                                                    |
|                                                            |                                                    |
| Rules_93                                                   | passed counts:3                                    |
| node_0: feature_name=HuIgG_0.10                            | feature_id[9].value <= threshold=19120.166015625   |
| node_1: feature_name=SARS.CoV.2.S1.RBD.mFc                 | feature_id[1].value > threshold=3773.8334350585938 |
| node_9: feature_name=a-HuIgG_0.30                          | feature_id[11].value > threshold=33726.833984375   |
| node_47: feature_name=SARS.CoV.2.S1.mFcTag                 | feature_id[0].value > threshold=43185.68359375     |
| node_57: feature_name=a-HuIgG_0.03                         | feature_id[14].value > threshold=10858.0           |
| node_71: feature_name=HuIgG_0.03                           | feature_id[8].value <= threshold=3796.0            |
| node_72: feature_name=SARS.CoV.2.S1.mFcTag                 | feature_id[0].value <= threshold=55206.517578125   |
| node_73: feature_name=SARS.CoV.2.S1.mFcTag                 | feature_id[0].value <= threshold=46065.833984375   |
| Class: healthcare workers 60–180 days after vaccination    |                                                    |
|                                                            |                                                    |
| Rules_94                                                   | passed counts:3                                    |
| node_0: feature_name=HuIgG_0.10                            | feature_id[9].value <= threshold=19120.166015625   |

|                                                            |                                                    |
|------------------------------------------------------------|----------------------------------------------------|
| node_1: feature_name=SARS.CoV.2.S1.RBD.mFc                 | feature_id[1].value > threshold=3773.8334350585938 |
| node_9: feature_name=a-HuIgG_0.30                          | feature_id[11].value > threshold=33726.833984375   |
| node_47: feature_name=SARS.CoV.2.S1.mFcTag                 | feature_id[0].value > threshold=43185.68359375     |
| node_57: feature_name=a-HuIgG_0.03                         | feature_id[14].value <= threshold=10858.0          |
| node_58: feature_name=HuIgG_0.30                           | feature_id[12].value > threshold=36767.33203125    |
| Class: healthcare workers 60–180 days after vaccination    |                                                    |
|                                                            |                                                    |
| Rules_95                                                   | passed counts:3                                    |
| node_0: feature_name=HuIgG_0.10                            | feature_id[9].value <= threshold=19120.166015625   |
| node_1: feature_name=SARS.CoV.2.S1.RBD.mFc                 | feature_id[1].value > threshold=3773.8334350585938 |
| node_9: feature_name=a-HuIgG_0.30                          | feature_id[11].value > threshold=33726.833984375   |
| node_47: feature_name=SARS.CoV.2.S1.mFcTag                 | feature_id[0].value > threshold=43185.68359375     |
| node_57: feature_name=a-HuIgG_0.03                         | feature_id[14].value <= threshold=10858.0          |
| node_58: feature_name=HuIgG_0.30                           | feature_id[12].value <= threshold=36767.33203125   |
| node_59: feature_name=a-HuIgG_0.10                         | feature_id[13].value > threshold=21868.0           |
| node_61: feature_name=a-HuIgG_0.03                         | feature_id[14].value > threshold=10179.0           |
| node_65: feature_name=SARS.CoV.2.S1                        | feature_id[6].value <= threshold=34029.666015625   |
| Class: healthcare workers within 60 days after vaccination |                                                    |
|                                                            |                                                    |
| Rules_96                                                   | passed counts:3                                    |
| node_0: feature_name=HuIgG_0.10                            | feature_id[9].value <= threshold=19120.166015625   |
| node_1: feature_name=SARS.CoV.2.S1.RBD.mFc                 | feature_id[1].value > threshold=3773.8334350585938 |
| node_9: feature_name=a-HuIgG_0.30                          | feature_id[11].value > threshold=33726.833984375   |
| node_47: feature_name=SARS.CoV.2.S1.mFcTag                 | feature_id[0].value <= threshold=43185.68359375    |
| node_48: feature_name=SARS.CoV.S1.RBD.HisTag               | feature_id[10].value > threshold=3416.129638671875 |

|                                                            |                                                     |
|------------------------------------------------------------|-----------------------------------------------------|
| node_52: feature_name=SARS.CoV.2.S1.HisTag                 | feature_id[2].value <= threshold=7094.0             |
| node_53: feature_name=a-HuIgG_0.30                         | feature_id[11].value <= threshold=42229.833984375   |
| Class: healthcare workers over 180 days after vaccination  |                                                     |
|                                                            |                                                     |
| Rules_97                                                   | passed counts:3                                     |
| node_0: feature_name=HuIgG_0.10                            | feature_id[9].value <= threshold=19120.166015625    |
| node_1: feature_name=SARS.CoV.2.S1.RBD.mFc                 | feature_id[1].value > threshold=3773.8334350585938  |
| node_9: feature_name=a-HuIgG_0.30                          | feature_id[11].value > threshold=33726.833984375    |
| node_47: feature_name=SARS.CoV.2.S1.mFcTag                 | feature_id[0].value <= threshold=43185.68359375     |
| node_48: feature_name=SARS.CoV.S1.RBD.HisTag               | feature_id[10].value <= threshold=3416.129638671875 |
| node_49: feature_name=SARS.CoV.2.S1.HisTag                 | feature_id[2].value > threshold=4582.9832763671875  |
| Class: unvaccinated healthcare workers                     |                                                     |
|                                                            |                                                     |
| Rules_98                                                   | passed counts:3                                     |
| node_0: feature_name=HuIgG_0.10                            | feature_id[9].value <= threshold=19120.166015625    |
| node_1: feature_name=SARS.CoV.2.S1.RBD.mFc                 | feature_id[1].value > threshold=3773.8334350585938  |
| node_9: feature_name=a-HuIgG_0.30                          | feature_id[11].value <= threshold=33726.833984375   |
| node_10: feature_name=HuIgG_0.03                           | feature_id[8].value > threshold=1023.1666564941406  |
| node_20: feature_name=SARS.CoV.S1.HisTag                   | feature_id[15].value > threshold=400.3000030517578  |
| node_24: feature_name=SARS.CoV.2.Spike.RBD.His.Bac         | feature_id[3].value > threshold=36933.69921875      |
| node_44: feature_name=SARS.CoV.2.Spike.RBD.His.Bac         | feature_id[3].value <= threshold=38377.58203125     |
| Class: healthcare workers within 60 days after vaccination |                                                     |
|                                                            |                                                     |
| Rules_99                                                   | passed counts:3                                     |
| node_0: feature_name=HuIgG_0.10                            | feature_id[9].value <= threshold=19120.166015625    |

|                                                           |                                                     |
|-----------------------------------------------------------|-----------------------------------------------------|
| node_1: feature_name=SARS.CoV.2.S1.RBD.mFc                | feature_id[1].value > threshold=3773.8334350585938  |
| node_9: feature_name=a-HuIgG_0.30                         | feature_id[11].value <= threshold=33726.833984375   |
| node_10: feature_name=HuIgG_0.03                          | feature_id[8].value <= threshold=1023.1666564941406 |
| node_11: feature_name=SARS.CoV.2.S1.mFcTag                | feature_id[0].value <= threshold=34194.916015625    |
| node_12: feature_name=SARS.CoV.2.S1+S2                    | feature_id[7].value > threshold=26709.75            |
| node_14: feature_name=SARS.CoV.2.Spike.RBD.His.HEK        | feature_id[4].value > threshold=8029.208251953125   |
| Class: healthcare workers over 180 days after vaccination |                                                     |
|                                                           |                                                     |
| Rules_100                                                 | passed counts:2                                     |
| node_0: feature_name=HuIgG_0.10                           | feature_id[9].value > threshold=19120.166015625     |
| node_92: feature_name=a-HuIgG_0.03                        | feature_id[14].value > threshold=19665.666015625    |
| node_382: feature_name=a-MoIgG_0.10                       | feature_id[16].value <= threshold=20281.6669921875  |
| node_383: feature_name=a-HuIgG_0.10                       | feature_id[13].value > threshold=33917.66796875     |
| node_391: feature_name=HuIgG_0.10                         | feature_id[9].value > threshold=25959.0             |
| node_393: feature_name=HuIgG_0.30                         | feature_id[12].value <= threshold=52448.166015625   |
| node_394: feature_name=a-HuIgG_0.10                       | feature_id[13].value > threshold=38348.5            |
| Class: healthcare workers over 180 days after vaccination |                                                     |
|                                                           |                                                     |
| Rules_101                                                 | passed counts:2                                     |
| node_0: feature_name=HuIgG_0.10                           | feature_id[9].value > threshold=19120.166015625     |
| node_92: feature_name=a-HuIgG_0.03                        | feature_id[14].value <= threshold=19665.666015625   |
| node_93: feature_name=SARS.CoV.2.Spike.RBD.His.HEK        | feature_id[4].value > threshold=3.0166666507720947  |
| node_105: feature_name=SARS.CoV.2.S1.mFcTag               | feature_id[0].value > threshold=54010.166015625     |
| node_305: feature_name=a-MoIgG_0.10                       | feature_id[16].value > threshold=2382.8333740234375 |
| node_309: feature_name=SARS.CoV.S1.HisTag                 | feature_id[15].value > threshold=23460.3330078125   |

|                                                            |                                                     |
|------------------------------------------------------------|-----------------------------------------------------|
| node_365: feature_name=a-HuIgG_0.03                        | feature_id[14].value > threshold=11128.66650390625  |
| node_367: feature_name=SARS.CoV.2.S1.mFcTag                | feature_id[0].value > threshold=54294.0             |
| node_371: feature_name=SARS.CoV.2.S1.mFcTag                | feature_id[0].value <= threshold=55620.833984375    |
| node_372: feature_name=a-HuIgG_0.10                        | feature_id[13].value > threshold=28320.6669921875   |
| node_374: feature_name=SARS.CoV.2.S1                       | feature_id[6].value > threshold=47335.5             |
| node_376: feature_name=SARS.CoV.2.S1+S2                    | feature_id[7].value > threshold=54353.83203125      |
| node_378: feature_name=SARS.CoV.2.S1+S2                    | feature_id[7].value <= threshold=54529.3828125      |
| Class: healthcare workers 60–180 days after vaccination    |                                                     |
|                                                            |                                                     |
| Rules_102                                                  | passed counts:2                                     |
| node_0: feature_name=HuIgG_0.10                            | feature_id[9].value > threshold=19120.166015625     |
| node_92: feature_name=a-HuIgG_0.03                         | feature_id[14].value <= threshold=19665.666015625   |
| node_93: feature_name=SARS.CoV.2.Spike.RBD.His.HEK         | feature_id[4].value > threshold=3.016666507720947   |
| node_105: feature_name=SARS.CoV.2.S1.mFcTag                | feature_id[0].value > threshold=54010.166015625     |
| node_305: feature_name=a-MoIgG_0.10                        | feature_id[16].value > threshold=2382.8333740234375 |
| node_309: feature_name=SARS.CoV.S1.HisTag                  | feature_id[15].value > threshold=23460.3330078125   |
| node_365: feature_name=a-HuIgG_0.03                        | feature_id[14].value > threshold=11128.66650390625  |
| node_367: feature_name=SARS.CoV.2.S1.mFcTag                | feature_id[0].value <= threshold=54294.0            |
| node_368: feature_name=SARS.CoV.2.Spike.RBD.His.HEK        | feature_id[4].value <= threshold=48797.25           |
| Class: healthcare workers within 60 days after vaccination |                                                     |
|                                                            |                                                     |
| Rules_103                                                  | passed counts:2                                     |
| node_0: feature_name=HuIgG_0.10                            | feature_id[9].value > threshold=19120.166015625     |
| node_92: feature_name=a-HuIgG_0.03                         | feature_id[14].value <= threshold=19665.666015625   |
| node_93: feature_name=SARS.CoV.2.Spike.RBD.His.HEK         | feature_id[4].value > threshold=3.016666507720947   |

|                                                         |                                                     |
|---------------------------------------------------------|-----------------------------------------------------|
| node_105: feature_name=SARS.CoV.2.S1.mFcTag             | feature_id[0].value > threshold=54010.166015625     |
| node_305: feature_name=a-MoIgG_0.10                     | feature_id[16].value > threshold=2382.8333740234375 |
| node_309: feature_name=SARS.CoV.S1.HisTag               | feature_id[15].value > threshold=23460.3330078125   |
| node_365: feature_name=a-HuIgG_0.03                     | feature_id[14].value <= threshold=11128.66650390625 |
| Class: healthcare workers 60–180 days after vaccination |                                                     |
| Rules_104                                               | passed counts:2                                     |
| node_0: feature_name=HuIgG_0.10                         | feature_id[9].value > threshold=19120.166015625     |
| node_92: feature_name=a-HuIgG_0.03                      | feature_id[14].value <= threshold=19665.666015625   |
| node_93: feature_name=SARS.CoV.2.Spike.RBD.His.HEK      | feature_id[4].value > threshold=3.0166666507720947  |
| node_105: feature_name=SARS.CoV.2.S1.mFcTag             | feature_id[0].value > threshold=54010.166015625     |
| node_305: feature_name=a-MoIgG_0.10                     | feature_id[16].value > threshold=2382.8333740234375 |
| node_309: feature_name=SARS.CoV.S1.HisTag               | feature_id[15].value <= threshold=23460.3330078125  |
| node_310: feature_name=HuIgG_0.03                       | feature_id[8].value <= threshold=6941.33349609375   |
| node_311: feature_name=a-HuIgG_0.10                     | feature_id[13].value > threshold=32620.5            |
| node_351: feature_name=SARS.CoV.S1.RBD.HisTag           | feature_id[10].value <= threshold=13834.0           |
| node_352: feature_name=SARS.CoV.2.S1                    | feature_id[6].value <= threshold=47365.833984375    |
| node_353: feature_name=SARS.CoV.2.Spike.RBD.His.HEK     | feature_id[4].value <= threshold=29192.4169921875   |
| node_354: feature_name=a-MoIgG_0.10                     | feature_id[16].value > threshold=3888.6666259765625 |
| Class: healthcare workers 60–180 days after vaccination |                                                     |
| Rules_105                                               | passed counts:2                                     |
| node_0: feature_name=HuIgG_0.10                         | feature_id[9].value > threshold=19120.166015625     |
| node_92: feature_name=a-HuIgG_0.03                      | feature_id[14].value <= threshold=19665.666015625   |
| node_93: feature_name=SARS.CoV.2.Spike.RBD.His.HEK      | feature_id[4].value > threshold=3.0166666507720947  |



|                                                            |                                                     |
|------------------------------------------------------------|-----------------------------------------------------|
| node_105: feature_name=SARS.CoV.2.S1.mFcTag                | feature_id[0].value > threshold=54010.166015625     |
| node_305: feature_name=a-MoIgG_0.10                        | feature_id[16].value > threshold=2382.8333740234375 |
| node_309: feature_name=SARS.CoV.S1.HisTag                  | feature_id[15].value <= threshold=23460.3330078125  |
| node_310: feature_name=HuIgG_0.03                          | feature_id[8].value <= threshold=6941.33349609375   |
| node_311: feature_name=a-HuIgG_0.10                        | feature_id[13].value <= threshold=32620.5           |
| node_312: feature_name=SARS.CoV.2.Spike.RBD.His.Bac        | feature_id[3].value > threshold=31266.0             |
| node_320: feature_name=a-HuIgG_0.30                        | feature_id[11].value <= threshold=47574.66796875    |
| node_321: feature_name=SARS.CoV.2.S1.RBD.mFc               | feature_id[1].value > threshold=47171.166015625     |
| node_323: feature_name=SARS.CoV.2.Spike.RBD.His.Bac        | feature_id[3].value > threshold=32929.0             |
| node_325: feature_name=SARS.CoV.2.Spike.RBD.His.Bac        | feature_id[3].value > threshold=37127.798828125     |
| node_333: feature_name=a-HuIgG_0.10                        | feature_id[13].value > threshold=30243.0            |
| node_339: feature_name=a-HuIgG_0.10                        | feature_id[13].value > threshold=31594.5            |
| node_343: feature_name=SARS.CoV.2.Spike.RBD.His.HEK        | feature_id[4].value > threshold=38606.166015625     |
| Class: healthcare workers within 60 days after vaccination |                                                     |
|                                                            |                                                     |
| Rules_106                                                  | passed counts:2                                     |
| node_0: feature_name=HuIgG_0.10                            | feature_id[9].value > threshold=19120.166015625     |
| node_92: feature_name=a-HuIgG_0.03                         | feature_id[14].value <= threshold=19665.666015625   |
| node_93: feature_name=SARS.CoV.2.Spike.RBD.His.HEK         | feature_id[4].value > threshold=3.016666507720947   |
| node_105: feature_name=SARS.CoV.2.S1.mFcTag                | feature_id[0].value > threshold=54010.166015625     |
| node_305: feature_name=a-MoIgG_0.10                        | feature_id[16].value > threshold=2382.8333740234375 |
| node_309: feature_name=SARS.CoV.S1.HisTag                  | feature_id[15].value <= threshold=23460.3330078125  |
| node_310: feature_name=HuIgG_0.03                          | feature_id[8].value <= threshold=6941.33349609375   |
| node_311: feature_name=a-HuIgG_0.10                        | feature_id[13].value <= threshold=32620.5           |
| node_312: feature_name=SARS.CoV.2.Spike.RBD.His.Bac        | feature_id[3].value > threshold=31266.0             |

|                                                            |                                                      |
|------------------------------------------------------------|------------------------------------------------------|
| node_320: feature_name=a-HuIgG_0.30                        | feature_id[11].value <= threshold=47574.66796875     |
| node_321: feature_name=SARS.CoV.2.S1.RBD.mFc               | feature_id[1].value > threshold=47171.166015625      |
| node_323: feature_name=SARS.CoV.2.Spike.RBD.His.Bac        | feature_id[3].value > threshold=32929.0              |
| node_325: feature_name=SARS.CoV.2.Spike.RBD.His.Bac        | feature_id[3].value > threshold=37127.798828125      |
| node_333: feature_name=a-HuIgG_0.10                        | feature_id[13].value <= threshold=30243.0            |
| node_334: feature_name=HuIgG_0.10                          | feature_id[9].value <= threshold=22263.333984375     |
| node_335: feature_name=a-MoIgG_0.10                        | feature_id[16].value <= threshold=4199.8333740234375 |
| Class: healthcare workers within 60 days after vaccination |                                                      |
|                                                            |                                                      |
| Rules_107                                                  | passed counts:2                                      |
| node_0: feature_name=HuIgG_0.10                            | feature_id[9].value > threshold=19120.166015625      |
| node_92: feature_name=a-HuIgG_0.03                         | feature_id[14].value <= threshold=19665.666015625    |
| node_93: feature_name=SARS.CoV.2.Spike.RBD.His.HEK         | feature_id[4].value > threshold=3.016666507720947    |
| node_105: feature_name=SARS.CoV.2.S1.mFcTag                | feature_id[0].value > threshold=54010.166015625      |
| node_305: feature_name=a-MoIgG_0.10                        | feature_id[16].value > threshold=2382.8333740234375  |
| node_309: feature_name=SARS.CoV.S1.HisTag                  | feature_id[15].value <= threshold=23460.3330078125   |
| node_310: feature_name=HuIgG_0.03                          | feature_id[8].value <= threshold=6941.33349609375    |
| node_311: feature_name=a-HuIgG_0.10                        | feature_id[13].value <= threshold=32620.5            |
| node_312: feature_name=SARS.CoV.2.Spike.RBD.His.Bac        | feature_id[3].value > threshold=31266.0              |
| node_320: feature_name=a-HuIgG_0.30                        | feature_id[11].value <= threshold=47574.66796875     |
| node_321: feature_name=SARS.CoV.2.S1.RBD.mFc               | feature_id[1].value > threshold=47171.166015625      |
| node_323: feature_name=SARS.CoV.2.Spike.RBD.His.Bac        | feature_id[3].value > threshold=32929.0              |
| node_325: feature_name=SARS.CoV.2.Spike.RBD.His.Bac        | feature_id[3].value <= threshold=37127.798828125     |
| node_326: feature_name=SARS.CoV.2.S1+S2                    | feature_id[7].value > threshold=49134.966796875      |
| node_328: feature_name=SARS.CoV.2.Spike.RBD.His.HEK        | feature_id[4].value > threshold=35038.25             |

|                                                            |                                                    |
|------------------------------------------------------------|----------------------------------------------------|
| node_330: feature_name=SARS.CoV.2.S1+S2                    | feature_id[7].value > threshold=52119.966796875    |
| Class: healthcare workers within 60 days after vaccination |                                                    |
|                                                            |                                                    |
| Rules_108                                                  | passed counts:2                                    |
| node_0: feature_name=HuIgG_0.10                            | feature_id[9].value > threshold=19120.166015625    |
| node_92: feature_name=a-HuIgG_0.03                         | feature_id[14].value <= threshold=19665.666015625  |
| node_93: feature_name=SARS.CoV.2.Spike.RBD.His.HEK         | feature_id[4].value > threshold=3.0166666507720947 |
| node_105: feature_name=SARS.CoV.2.S1.mFcTag                | feature_id[0].value <= threshold=54010.166015625   |
| node_106: feature_name=SARS.CoV.2.S1+S2                    | feature_id[7].value > threshold=48317.708984375    |
| node_228: feature_name=a-MoIgG_0.10                        | feature_id[16].value > threshold=1652.5            |
| node_230: feature_name=HuIgG_0.10                          | feature_id[9].value > threshold=30107.666015625    |
| Class: healthcare workers 60–180 days after vaccination    |                                                    |
|                                                            |                                                    |
| Rules_109                                                  | passed counts:2                                    |
| node_0: feature_name=HuIgG_0.10                            | feature_id[9].value > threshold=19120.166015625    |
| node_92: feature_name=a-HuIgG_0.03                         | feature_id[14].value <= threshold=19665.666015625  |
| node_93: feature_name=SARS.CoV.2.Spike.RBD.His.HEK         | feature_id[4].value > threshold=3.0166666507720947 |
| node_105: feature_name=SARS.CoV.2.S1.mFcTag                | feature_id[0].value <= threshold=54010.166015625   |
| node_106: feature_name=SARS.CoV.2.S1+S2                    | feature_id[7].value > threshold=48317.708984375    |
| node_228: feature_name=a-MoIgG_0.10                        | feature_id[16].value > threshold=1652.5            |
| node_230: feature_name=HuIgG_0.10                          | feature_id[9].value <= threshold=30107.666015625   |
| node_231: feature_name=HuIgG_0.03                          | feature_id[8].value > threshold=5533.83349609375   |
| node_247: feature_name=HuIgG_0.10                          | feature_id[9].value > threshold=24231.0            |
| node_261: feature_name=SARS.CoV.S1.RBD.HisTag              | feature_id[10].value > threshold=24179.0419921875  |
| node_293: feature_name=SARS.CoV.2.S1.HisTag                | feature_id[2].value <= threshold=54233.25          |

|                                                            |                                                    |
|------------------------------------------------------------|----------------------------------------------------|
| node_294: feature_name=SARS.CoV.2.S1.mFcTag                | feature_id[0].value > threshold=50885.83203125     |
| node_298: feature_name=a-HuIgG_0.30                        | feature_id[11].value <= threshold=40480.16796875   |
| node_299: feature_name=SARS.CoV.2.S1+S2                    | feature_id[7].value <= threshold=52487.333984375   |
| Class: healthcare workers within 60 days after vaccination |                                                    |
|                                                            |                                                    |
| Rules_110                                                  | passed counts:2                                    |
| node_0: feature_name=HuIgG_0.10                            | feature_id[9].value > threshold=19120.166015625    |
| node_92: feature_name=a-HuIgG_0.03                         | feature_id[14].value <= threshold=19665.666015625  |
| node_93: feature_name=SARS.CoV.2.Spike.RBD.His.HEK         | feature_id[4].value > threshold=3.016666507720947  |
| node_105: feature_name=SARS.CoV.2.S1.mFcTag                | feature_id[0].value <= threshold=54010.166015625   |
| node_106: feature_name=SARS.CoV.2.S1+S2                    | feature_id[7].value > threshold=48317.708984375    |
| node_228: feature_name=a-MoIgG_0.10                        | feature_id[16].value > threshold=1652.5            |
| node_230: feature_name=HuIgG_0.10                          | feature_id[9].value <= threshold=30107.666015625   |
| node_231: feature_name=HuIgG_0.03                          | feature_id[8].value > threshold=5533.83349609375   |
| node_247: feature_name=HuIgG_0.10                          | feature_id[9].value > threshold=24231.0            |
| node_261: feature_name=SARS.CoV.S1.RBD.HisTag              | feature_id[10].value <= threshold=24179.0419921875 |
| node_262: feature_name=HuIgG_0.10                          | feature_id[9].value > threshold=25555.333984375    |
| node_266: feature_name=HuIgG_0.10                          | feature_id[9].value > threshold=25659.6669921875   |
| node_270: feature_name=SARS.CoV.S1.HisTag                  | feature_id[15].value > threshold=10000.5830078125  |
| node_276: feature_name=SARS.CoV.S1.HisTag                  | feature_id[15].value <= threshold=13228.125        |
| node_277: feature_name=SARS.CoV.2.Spike.RBD.His.Bac        | feature_id[3].value <= threshold=33671.91796875    |
| Class: healthcare workers within 60 days after vaccination |                                                    |
|                                                            |                                                    |
| Rules_111                                                  | passed counts:2                                    |
| node_0: feature_name=HuIgG_0.10                            | feature_id[9].value > threshold=19120.166015625    |

|                                                         |                                                    |
|---------------------------------------------------------|----------------------------------------------------|
| node_92: feature_name=a-HuIgG_0.03                      | feature_id[14].value <= threshold=19665.666015625  |
| node_93: feature_name=SARS.CoV.2.Spike.RBD.His.HEK      | feature_id[4].value > threshold=3.0166666507720947 |
| node_105: feature_name=SARS.CoV.2.S1.mFcTag             | feature_id[0].value <= threshold=54010.166015625   |
| node_106: feature_name=SARS.CoV.2.S1+S2                 | feature_id[7].value > threshold=48317.708984375    |
| node_228: feature_name=a-MoIgG_0.10                     | feature_id[16].value > threshold=1652.5            |
| node_230: feature_name=HuIgG_0.10                       | feature_id[9].value <= threshold=30107.666015625   |
| node_231: feature_name=HuIgG_0.03                       | feature_id[8].value > threshold=5533.83349609375   |
| node_247: feature_name=HuIgG_0.10                       | feature_id[9].value <= threshold=24231.0           |
| node_248: feature_name=SARS.CoV.2.S1.HisTag             | feature_id[2].value > threshold=43585.92578125     |
| node_256: feature_name=SARS.CoV.2.S1+S2                 | feature_id[7].value > threshold=52592.591796875    |
| Class: healthcare workers 60–180 days after vaccination |                                                    |
|                                                         |                                                    |
| Rules_112                                               | passed counts:2                                    |
| node_0: feature_name=HuIgG_0.10                         | feature_id[9].value > threshold=19120.166015625    |
| node_92: feature_name=a-HuIgG_0.03                      | feature_id[14].value <= threshold=19665.666015625  |
| node_93: feature_name=SARS.CoV.2.Spike.RBD.His.HEK      | feature_id[4].value > threshold=3.0166666507720947 |
| node_105: feature_name=SARS.CoV.2.S1.mFcTag             | feature_id[0].value <= threshold=54010.166015625   |
| node_106: feature_name=SARS.CoV.2.S1+S2                 | feature_id[7].value > threshold=48317.708984375    |
| node_228: feature_name=a-MoIgG_0.10                     | feature_id[16].value > threshold=1652.5            |
| node_230: feature_name=HuIgG_0.10                       | feature_id[9].value <= threshold=30107.666015625   |
| node_231: feature_name=HuIgG_0.03                       | feature_id[8].value > threshold=5533.83349609375   |
| node_247: feature_name=HuIgG_0.10                       | feature_id[9].value <= threshold=24231.0           |
| node_248: feature_name=SARS.CoV.2.S1.HisTag             | feature_id[2].value <= threshold=43585.92578125    |
| node_249: feature_name=HuIgG_0.10                       | feature_id[9].value <= threshold=23668.3330078125  |
| node_250: feature_name=SARS.CoV.2.S1+S2                 | feature_id[7].value > threshold=49682.4921875      |

|                                                           |                                                    |
|-----------------------------------------------------------|----------------------------------------------------|
| node_252: feature_name=a-HuIgG_0.30                       | feature_id[11].value <= threshold=39201.833984375  |
| Class: healthcare workers 60–180 days after vaccination   |                                                    |
|                                                           |                                                    |
| Rules_113                                                 | passed counts:2                                    |
| node_0: feature_name=HuIgG_0.10                           | feature_id[9].value > threshold=19120.166015625    |
| node_92: feature_name=a-HuIgG_0.03                        | feature_id[14].value <= threshold=19665.666015625  |
| node_93: feature_name=SARS.CoV.2.Spike.RBD.His.HEK        | feature_id[4].value > threshold=3.0166666507720947 |
| node_105: feature_name=SARS.CoV.2.S1.mFcTag               | feature_id[0].value <= threshold=54010.166015625   |
| node_106: feature_name=SARS.CoV.2.S1+S2                   | feature_id[7].value > threshold=48317.708984375    |
| node_228: feature_name=a-MoIgG_0.10                       | feature_id[16].value <= threshold=1652.5           |
| Class: healthcare workers over 180 days after vaccination |                                                    |
|                                                           |                                                    |
| Rules_114                                                 | passed counts:2                                    |
| node_0: feature_name=HuIgG_0.10                           | feature_id[9].value > threshold=19120.166015625    |
| node_92: feature_name=a-HuIgG_0.03                        | feature_id[14].value <= threshold=19665.666015625  |
| node_93: feature_name=SARS.CoV.2.Spike.RBD.His.HEK        | feature_id[4].value > threshold=3.0166666507720947 |
| node_105: feature_name=SARS.CoV.2.S1.mFcTag               | feature_id[0].value <= threshold=54010.166015625   |
| node_106: feature_name=SARS.CoV.2.S1+S2                   | feature_id[7].value <= threshold=48317.708984375   |
| node_107: feature_name=a-HuIgG_0.03                       | feature_id[14].value > threshold=12099.83349609375 |
| node_155: feature_name=SARS.CoV.2.Spike.RBD.His.Bac       | feature_id[3].value > threshold=18979.9912109375   |
| node_167: feature_name=a-MoIgG_0.10                       | feature_id[16].value > threshold=4979.5            |
| node_201: feature_name=HuIgG_0.10                         | feature_id[9].value > threshold=26006.0            |
| node_225: feature_name=SARS.CoV.2.Spike.RBD.His.HEK       | feature_id[4].value <= threshold=26047.1416015625  |
| Class: healthcare workers 60–180 days after vaccination   |                                                    |
|                                                           |                                                    |

|                                                         |                                                    |
|---------------------------------------------------------|----------------------------------------------------|
| Rules_115                                               | passed counts:2                                    |
| node_0: feature_name=HuIgG_0.10                         | feature_id[9].value > threshold=19120.166015625    |
| node_92: feature_name=a-HuIgG_0.03                      | feature_id[14].value <= threshold=19665.666015625  |
| node_93: feature_name=SARS.CoV.2.Spike.RBD.His.HEK      | feature_id[4].value > threshold=3.0166666507720947 |
| node_105: feature_name=SARS.CoV.2.S1.mFcTag             | feature_id[0].value <= threshold=54010.166015625   |
| node_106: feature_name=SARS.CoV.2.S1+S2                 | feature_id[7].value <= threshold=48317.708984375   |
| node_107: feature_name=a-HuIgG_0.03                     | feature_id[14].value > threshold=12099.83349609375 |
| node_155: feature_name=SARS.CoV.2.Spike.RBD.His.Bac     | feature_id[3].value > threshold=18979.9912109375   |
| node_167: feature_name=a-MoIgG_0.10                     | feature_id[16].value > threshold=4979.5            |
| node_201: feature_name=HuIgG_0.10                       | feature_id[9].value <= threshold=26006.0           |
| node_202: feature_name=HuIgG_0.03                       | feature_id[8].value <= threshold=6080.0            |
| node_203: feature_name=SARS.CoV.2.S1.HisTag             | feature_id[2].value <= threshold=38575.359375      |
| node_204: feature_name=SARS.CoV.2.Spike.RBD.His.HEK     | feature_id[4].value > threshold=21567.4501953125   |
| node_208: feature_name=HuIgG_0.03                       | feature_id[8].value <= threshold=4924.333251953125 |
| node_209: feature_name=SARS.CoV.2.Spike.RBD.His.Bac     | feature_id[3].value <= threshold=31771.125         |
| Class: healthcare workers 60–180 days after vaccination |                                                    |
|                                                         |                                                    |
| Rules_116                                               | passed counts:2                                    |
| node_0: feature_name=HuIgG_0.10                         | feature_id[9].value > threshold=19120.166015625    |
| node_92: feature_name=a-HuIgG_0.03                      | feature_id[14].value <= threshold=19665.666015625  |
| node_93: feature_name=SARS.CoV.2.Spike.RBD.His.HEK      | feature_id[4].value > threshold=3.0166666507720947 |
| node_105: feature_name=SARS.CoV.2.S1.mFcTag             | feature_id[0].value <= threshold=54010.166015625   |
| node_106: feature_name=SARS.CoV.2.S1+S2                 | feature_id[7].value <= threshold=48317.708984375   |
| node_107: feature_name=a-HuIgG_0.03                     | feature_id[14].value > threshold=12099.83349609375 |
| node_155: feature_name=SARS.CoV.2.Spike.RBD.His.Bac     | feature_id[3].value > threshold=18979.9912109375   |

|                                                         |                                                    |
|---------------------------------------------------------|----------------------------------------------------|
| node_167: feature_name=a-MoIgG_0.10                     | feature_id[16].value > threshold=4979.5            |
| node_201: feature_name=HuIgG_0.10                       | feature_id[9].value <= threshold=26006.0           |
| node_202: feature_name=HuIgG_0.03                       | feature_id[8].value <= threshold=6080.0            |
| node_203: feature_name=SARS.CoV.2.S1.HisTag             | feature_id[2].value <= threshold=38575.359375      |
| node_204: feature_name=SARS.CoV.2.Spike.RBD.His.HEK     | feature_id[4].value <= threshold=21567.4501953125  |
| node_205: feature_name=HuIgG_0.10                       | feature_id[9].value > threshold=23045.6669921875   |
| Class: healthcare workers 60–180 days after vaccination |                                                    |
|                                                         |                                                    |
| Rules_117                                               | passed counts:2                                    |
| node_0: feature_name=HuIgG_0.10                         | feature_id[9].value > threshold=19120.166015625    |
| node_92: feature_name=a-HuIgG_0.03                      | feature_id[14].value <= threshold=19665.666015625  |
| node_93: feature_name=SARS.CoV.2.Spike.RBD.His.HEK      | feature_id[4].value > threshold=3.0166666507720947 |
| node_105: feature_name=SARS.CoV.2.S1.mFcTag             | feature_id[0].value <= threshold=54010.166015625   |
| node_106: feature_name=SARS.CoV.2.S1+S2                 | feature_id[7].value <= threshold=48317.708984375   |
| node_107: feature_name=a-HuIgG_0.03                     | feature_id[14].value > threshold=12099.83349609375 |
| node_155: feature_name=SARS.CoV.2.Spike.RBD.His.Bac     | feature_id[3].value > threshold=18979.9912109375   |
| node_167: feature_name=a-MoIgG_0.10                     | feature_id[16].value <= threshold=4979.5           |
| node_168: feature_name=SARS.CoV.2.S1+S2                 | feature_id[7].value > threshold=36298.75           |
| node_172: feature_name=SARS.CoV.2.S1.RBD.mFc            | feature_id[1].value > threshold=40153.283203125    |
| node_182: feature_name=HuIgG_0.10                       | feature_id[9].value > threshold=21919.833984375    |
| node_186: feature_name=a-HuIgG_0.10                     | feature_id[13].value > threshold=28919.0           |
| node_192: feature_name=a-HuIgG_0.10                     | feature_id[13].value > threshold=31482.6669921875  |
| node_198: feature_name=SARS.CoV.2.S1.mFcTag             | feature_id[0].value <= threshold=50108.16796875    |
| Class: healthcare workers 60–180 days after vaccination |                                                    |
|                                                         |                                                    |



|                                                         |                                                      |
|---------------------------------------------------------|------------------------------------------------------|
| Rules_118                                               | passed counts:2                                      |
| node_0: feature_name=HuIgG_0.10                         | feature_id[9].value > threshold=19120.166015625      |
| node_92: feature_name=a-HuIgG_0.03                      | feature_id[14].value <= threshold=19665.666015625    |
| node_93: feature_name=SARS.CoV.2.Spike.RBD.His.HEK      | feature_id[4].value > threshold=3.0166666507720947   |
| node_105: feature_name=SARS.CoV.2.S1.mFcTag             | feature_id[0].value <= threshold=54010.166015625     |
| node_106: feature_name=SARS.CoV.2.S1+S2                 | feature_id[7].value <= threshold=48317.708984375     |
| node_107: feature_name=a-HuIgG_0.03                     | feature_id[14].value > threshold=12099.83349609375   |
| node_155: feature_name=SARS.CoV.2.Spike.RBD.His.Bac     | feature_id[3].value > threshold=18979.9912109375     |
| node_167: feature_name=a-MoIgG_0.10                     | feature_id[16].value <= threshold=4979.5             |
| node_168: feature_name=SARS.CoV.2.S1+S2                 | feature_id[7].value > threshold=36298.75             |
| node_172: feature_name=SARS.CoV.2.S1.RBD.mFc            | feature_id[1].value > threshold=40153.283203125      |
| node_182: feature_name=HuIgG_0.10                       | feature_id[9].value > threshold=21919.833984375      |
| node_186: feature_name=a-HuIgG_0.10                     | feature_id[13].value <= threshold=28919.0            |
| node_187: feature_name=SARS.CoV.S1.HisTag               | feature_id[15].value <= threshold=4488.5833740234375 |
| Class: healthcare workers 60–180 days after vaccination |                                                      |
|                                                         |                                                      |
| Rules_119                                               | passed counts:2                                      |
| node_0: feature_name=HuIgG_0.10                         | feature_id[9].value > threshold=19120.166015625      |
| node_92: feature_name=a-HuIgG_0.03                      | feature_id[14].value <= threshold=19665.666015625    |
| node_93: feature_name=SARS.CoV.2.Spike.RBD.His.HEK      | feature_id[4].value > threshold=3.0166666507720947   |
| node_105: feature_name=SARS.CoV.2.S1.mFcTag             | feature_id[0].value <= threshold=54010.166015625     |
| node_106: feature_name=SARS.CoV.2.S1+S2                 | feature_id[7].value <= threshold=48317.708984375     |
| node_107: feature_name=a-HuIgG_0.03                     | feature_id[14].value > threshold=12099.83349609375   |
| node_155: feature_name=SARS.CoV.2.Spike.RBD.His.Bac     | feature_id[3].value > threshold=18979.9912109375     |
| node_167: feature_name=a-MoIgG_0.10                     | feature_id[16].value <= threshold=4979.5             |

|                                                         |                                                     |
|---------------------------------------------------------|-----------------------------------------------------|
| node_168: feature_name=SARS.CoV.2.S1+S2                 | feature_id[7].value > threshold=36298.75            |
| node_172: feature_name=SARS.CoV.2.S1.RBD.mFc            | feature_id[1].value <= threshold=40153.283203125    |
| node_173: feature_name=SARS.CoV.2.S1.HisTag             | feature_id[2].value > threshold=25186.375           |
| node_175: feature_name=a-HuIgG_0.10                     | feature_id[13].value > threshold=27831.166015625    |
| node_177: feature_name=SARS.CoV.2.S1                    | feature_id[6].value <= threshold=29819.333984375    |
| node_178: feature_name=SARS.CoV.2.S1.HisTag             | feature_id[2].value <= threshold=28188.974609375    |
| Class: healthcare workers 60–180 days after vaccination |                                                     |
|                                                         |                                                     |
| Rules_120                                               | passed counts:2                                     |
| node_0: feature_name=HuIgG_0.10                         | feature_id[9].value > threshold=19120.166015625     |
| node_92: feature_name=a-HuIgG_0.03                      | feature_id[14].value <= threshold=19665.666015625   |
| node_93: feature_name=SARS.CoV.2.Spike.RBD.His.HEK      | feature_id[4].value > threshold=3.0166666507720947  |
| node_105: feature_name=SARS.CoV.2.S1.mFcTag             | feature_id[0].value <= threshold=54010.166015625    |
| node_106: feature_name=SARS.CoV.2.S1+S2                 | feature_id[7].value <= threshold=48317.708984375    |
| node_107: feature_name=a-HuIgG_0.03                     | feature_id[14].value > threshold=12099.83349609375  |
| node_155: feature_name=SARS.CoV.2.Spike.RBD.His.Bac     | feature_id[3].value > threshold=18979.9912109375    |
| node_167: feature_name=a-MoIgG_0.10                     | feature_id[16].value <= threshold=4979.5            |
| node_168: feature_name=SARS.CoV.2.S1+S2                 | feature_id[7].value <= threshold=36298.75           |
| node_169: feature_name=SARS.CoV.S1.RBD.HisTag           | feature_id[10].value <= threshold=6739.833251953125 |
| Class: healthcare workers 60–180 days after vaccination |                                                     |
|                                                         |                                                     |
| Rules_121                                               | passed counts:2                                     |
| node_0: feature_name=HuIgG_0.10                         | feature_id[9].value > threshold=19120.166015625     |
| node_92: feature_name=a-HuIgG_0.03                      | feature_id[14].value <= threshold=19665.666015625   |
| node_93: feature_name=SARS.CoV.2.Spike.RBD.His.HEK      | feature_id[4].value > threshold=3.0166666507720947  |

|                                                            |                                                      |
|------------------------------------------------------------|------------------------------------------------------|
| node_105: feature_name=SARS.CoV.2.S1.mFcTag                | feature_id[0].value <= threshold=54010.166015625     |
| node_106: feature_name=SARS.CoV.2.S1+S2                    | feature_id[7].value <= threshold=48317.708984375     |
| node_107: feature_name=a-HuIgG_0.03                        | feature_id[14].value > threshold=12099.83349609375   |
| node_155: feature_name=SARS.CoV.2.Spike.RBD.His.Bac        | feature_id[3].value <= threshold=18979.9912109375    |
| node_156: feature_name=a-MoIgG_0.10                        | feature_id[16].value <= threshold=1739.1666259765625 |
| node_157: feature_name=SARS.CoV.S1.RBD.HisTag              | feature_id[10].value > threshold=1304.0555419921875  |
| Class: healthcare workers over 180 days after vaccination  |                                                      |
|                                                            |                                                      |
| Rules_122                                                  | passed counts:2                                      |
| node_0: feature_name=HuIgG_0.10                            | feature_id[9].value > threshold=19120.166015625      |
| node_92: feature_name=a-HuIgG_0.03                         | feature_id[14].value <= threshold=19665.666015625    |
| node_93: feature_name=SARS.CoV.2.Spike.RBD.His.HEK         | feature_id[4].value > threshold=3.0166666507720947   |
| node_105: feature_name=SARS.CoV.2.S1.mFcTag                | feature_id[0].value <= threshold=54010.166015625     |
| node_106: feature_name=SARS.CoV.2.S1+S2                    | feature_id[7].value <= threshold=48317.708984375     |
| node_107: feature_name=a-HuIgG_0.03                        | feature_id[14].value <= threshold=12099.83349609375  |
| node_108: feature_name=SARS.CoV.2.Spike.RBD.His.Bac        | feature_id[3].value > threshold=23841.4169921875     |
| node_118: feature_name=SARS.CoV.2.Spike.RBD.rFc            | feature_id[5].value > threshold=34554.69140625       |
| node_120: feature_name=SARS.CoV.2.S1                       | feature_id[6].value > threshold=36508.716796875      |
| node_142: feature_name=HuIgG_0.30                          | feature_id[12].value > threshold=40622.83203125      |
| node_150: feature_name=SARS.CoV.S1.RBD.HisTag              | feature_id[10].value <= threshold=9578.58349609375   |
| Class: healthcare workers within 60 days after vaccination |                                                      |
|                                                            |                                                      |
| Rules_123                                                  | passed counts:2                                      |
| node_0: feature_name=HuIgG_0.10                            | feature_id[9].value > threshold=19120.166015625      |
| node_92: feature_name=a-HuIgG_0.03                         | feature_id[14].value <= threshold=19665.666015625    |

|                                                         |                                                     |
|---------------------------------------------------------|-----------------------------------------------------|
| node_93: feature_name=SARS.CoV.2.Spike.RBD.His.HEK      | feature_id[4].value > threshold=3.0166666507720947  |
| node_105: feature_name=SARS.CoV.2.S1.mFcTag             | feature_id[0].value <= threshold=54010.166015625    |
| node_106: feature_name=SARS.CoV.2.S1+S2                 | feature_id[7].value <= threshold=48317.708984375    |
| node_107: feature_name=a-HuIgG_0.03                     | feature_id[14].value <= threshold=12099.83349609375 |
| node_108: feature_name=SARS.CoV.2.Spike.RBD.His.Bac     | feature_id[3].value > threshold=23841.4169921875    |
| node_118: feature_name=SARS.CoV.2.Spike.RBD.rFc         | feature_id[5].value > threshold=34554.69140625      |
| node_120: feature_name=SARS.CoV.2.S1                    | feature_id[6].value <= threshold=36508.716796875    |
| node_121: feature_name=HuIgG_0.10                       | feature_id[9].value <= threshold=24763.3330078125   |
| node_122: feature_name=SARS.CoV.2.Spike.RBD.rFc         | feature_id[5].value <= threshold=42966.541015625    |
| node_123: feature_name=SARS.CoV.2.S1+S2                 | feature_id[7].value <= threshold=43434.54296875     |
| node_124: feature_name=SARS.CoV.2.S1+S2                 | feature_id[7].value <= threshold=42800.94140625     |
| node_125: feature_name=SARS.CoV.2.S1.mFcTag             | feature_id[0].value > threshold=47427.1328125       |
| node_129: feature_name=a-MoIgG_0.10                     | feature_id[16].value > threshold=5634.0             |
| node_131: feature_name=SARS.CoV.2.S1.RBD.mFc            | feature_id[1].value > threshold=39372.166015625     |
| Class: healthcare workers 60–180 days after vaccination |                                                     |
|                                                         |                                                     |
| Rules_124                                               | passed counts:2                                     |
| node_0: feature_name=HuIgG_0.10                         | feature_id[9].value <= threshold=19120.166015625    |
| node_1: feature_name=SARS.CoV.2.S1.RBD.mFc              | feature_id[1].value > threshold=3773.8334350585938  |
| node_9: feature_name=a-HuIgG_0.30                       | feature_id[11].value > threshold=33726.833984375    |
| node_47: feature_name=SARS.CoV.2.S1.mFcTag              | feature_id[0].value > threshold=43185.68359375      |
| node_57: feature_name=a-HuIgG_0.03                      | feature_id[14].value > threshold=10858.0            |
| node_71: feature_name=HuIgG_0.03                        | feature_id[8].value <= threshold=3796.0             |
| node_72: feature_name=SARS.CoV.2.S1.mFcTag              | feature_id[0].value <= threshold=55206.517578125    |
| node_73: feature_name=SARS.CoV.2.S1.mFcTag              | feature_id[0].value > threshold=46065.833984375     |

|                                                           |                                                     |
|-----------------------------------------------------------|-----------------------------------------------------|
| node_75: feature_name=SARS.CoV.2.S1                       | feature_id[6].value > threshold=35627.0             |
| node_77: feature_name=SARS.CoV.S1.HisTag                  | feature_id[15].value <= threshold=21926.9169921875  |
| node_78: feature_name=SARS.CoV.2.S1+S2                    | feature_id[7].value <= threshold=40211.734375       |
| Class: healthcare workers over 180 days after vaccination |                                                     |
|                                                           |                                                     |
| Rules_125                                                 | passed counts:2                                     |
| node_0: feature_name=HuIgG_0.10                           | feature_id[9].value <= threshold=19120.166015625    |
| node_1: feature_name=SARS.CoV.2.S1.RBD.mFc                | feature_id[1].value > threshold=3773.8334350585938  |
| node_9: feature_name=a-HuIgG_0.30                         | feature_id[11].value > threshold=33726.833984375    |
| node_47: feature_name=SARS.CoV.2.S1.mFcTag                | feature_id[0].value > threshold=43185.68359375      |
| node_57: feature_name=a-HuIgG_0.03                        | feature_id[14].value <= threshold=10858.0           |
| node_58: feature_name=HuIgG_0.30                          | feature_id[12].value <= threshold=36767.33203125    |
| node_59: feature_name=a-HuIgG_0.10                        | feature_id[13].value <= threshold=21868.0           |
| Class: healthcare workers over 180 days after vaccination |                                                     |
|                                                           |                                                     |
| Rules_126                                                 | passed counts:2                                     |
| node_0: feature_name=HuIgG_0.10                           | feature_id[9].value <= threshold=19120.166015625    |
| node_1: feature_name=SARS.CoV.2.S1.RBD.mFc                | feature_id[1].value > threshold=3773.8334350585938  |
| node_9: feature_name=a-HuIgG_0.30                         | feature_id[11].value <= threshold=33726.833984375   |
| node_10: feature_name=HuIgG_0.03                          | feature_id[8].value > threshold=1023.1666564941406  |
| node_20: feature_name=SARS.CoV.S1.HisTag                  | feature_id[15].value <= threshold=400.3000030517578 |
| node_21: feature_name=SARS.CoV.2.Spike.RBD.His.HEK        | feature_id[4].value > threshold=2291.9304809570312  |
| Class: unvaccinated healthcare workers                    |                                                     |
|                                                           |                                                     |
| Rules_127                                                 | passed counts:1                                     |

|                                                           |                                                    |
|-----------------------------------------------------------|----------------------------------------------------|
| node_0: feature_name=HuIgG_0.10                           | feature_id[9].value > threshold=19120.166015625    |
| node_92: feature_name=a-HuIgG_0.03                        | feature_id[14].value > threshold=19665.666015625   |
| node_382: feature_name=a-MoIgG_0.10                       | feature_id[16].value <= threshold=20281.6669921875 |
| node_383: feature_name=a-HuIgG_0.10                       | feature_id[13].value > threshold=33917.66796875    |
| node_391: feature_name=HuIgG_0.10                         | feature_id[9].value > threshold=25959.0            |
| node_393: feature_name=HuIgG_0.30                         | feature_id[12].value <= threshold=52448.166015625  |
| node_394: feature_name=a-HuIgG_0.10                       | feature_id[13].value <= threshold=38348.5          |
| node_395: feature_name=a-HuIgG_0.30                       | feature_id[11].value <= threshold=53098.833984375  |
| node_396: feature_name=SARS.CoV.S1.RBD.HisTag             | feature_id[10].value > threshold=36882.4677734375  |
| Class: healthcare workers 60–180 days after vaccination   |                                                    |
|                                                           |                                                    |
| Rules_128                                                 | passed counts:1                                    |
| node_0: feature_name=HuIgG_0.10                           | feature_id[9].value > threshold=19120.166015625    |
| node_92: feature_name=a-HuIgG_0.03                        | feature_id[14].value > threshold=19665.666015625   |
| node_382: feature_name=a-MoIgG_0.10                       | feature_id[16].value <= threshold=20281.6669921875 |
| node_383: feature_name=a-HuIgG_0.10                       | feature_id[13].value > threshold=33917.66796875    |
| node_391: feature_name=HuIgG_0.10                         | feature_id[9].value > threshold=25959.0            |
| node_393: feature_name=HuIgG_0.30                         | feature_id[12].value <= threshold=52448.166015625  |
| node_394: feature_name=a-HuIgG_0.10                       | feature_id[13].value <= threshold=38348.5          |
| node_395: feature_name=a-HuIgG_0.30                       | feature_id[11].value <= threshold=53098.833984375  |
| node_396: feature_name=SARS.CoV.S1.RBD.HisTag             | feature_id[10].value <= threshold=36882.4677734375 |
| Class: healthcare workers over 180 days after vaccination |                                                    |
|                                                           |                                                    |
| Rules_129                                                 | passed counts:1                                    |
| node_0: feature_name=HuIgG_0.10                           | feature_id[9].value > threshold=19120.166015625    |

|                                                           |                                                     |
|-----------------------------------------------------------|-----------------------------------------------------|
| node_92: feature_name=a-HuIgG_0.03                        | feature_id[14].value > threshold=19665.666015625    |
| node_382: feature_name=a-MoIgG_0.10                       | feature_id[16].value <= threshold=20281.6669921875  |
| node_383: feature_name=a-HuIgG_0.10                       | feature_id[13].value <= threshold=33917.66796875    |
| node_384: feature_name=SARS.CoV.2.S1.mFcTag               | feature_id[0].value > threshold=52180.75            |
| node_388: feature_name=SARS.CoV.S1.RBD.HisTag             | feature_id[10].value > threshold=52228.166015625    |
| Class: healthcare workers over 180 days after vaccination |                                                     |
|                                                           |                                                     |
| Rules_130                                                 | passed counts:1                                     |
| node_0: feature_name=HuIgG_0.10                           | feature_id[9].value > threshold=19120.166015625     |
| node_92: feature_name=a-HuIgG_0.03                        | feature_id[14].value > threshold=19665.666015625    |
| node_382: feature_name=a-MoIgG_0.10                       | feature_id[16].value <= threshold=20281.6669921875  |
| node_383: feature_name=a-HuIgG_0.10                       | feature_id[13].value <= threshold=33917.66796875    |
| node_384: feature_name=SARS.CoV.2.S1.mFcTag               | feature_id[0].value <= threshold=52180.75           |
| node_385: feature_name=SARS.CoV.S1.HisTag                 | feature_id[15].value <= threshold=6022.0166015625   |
| Class: healthcare workers 60–180 days after vaccination   |                                                     |
|                                                           |                                                     |
| Rules_131                                                 | passed counts:1                                     |
| node_0: feature_name=HuIgG_0.10                           | feature_id[9].value > threshold=19120.166015625     |
| node_92: feature_name=a-HuIgG_0.03                        | feature_id[14].value <= threshold=19665.666015625   |
| node_93: feature_name=SARS.CoV.2.Spike.RBD.His.HEK        | feature_id[4].value > threshold=3.0166666507720947  |
| node_105: feature_name=SARS.CoV.2.S1.mFcTag               | feature_id[0].value > threshold=54010.166015625     |
| node_305: feature_name=a-MoIgG_0.10                       | feature_id[16].value > threshold=2382.8333740234375 |
| node_309: feature_name=SARS.CoV.S1.HisTag                 | feature_id[15].value > threshold=23460.3330078125   |
| node_365: feature_name=a-HuIgG_0.03                       | feature_id[14].value > threshold=11128.66650390625  |
| node_367: feature_name=SARS.CoV.2.S1.mFcTag               | feature_id[0].value > threshold=54294.0             |

|                                                         |                                                     |
|---------------------------------------------------------|-----------------------------------------------------|
| node_371: feature_name=SARS.CoV.2.S1.mFcTag             | feature_id[0].value > threshold=55620.833984375     |
| Class: healthcare workers 60–180 days after vaccination |                                                     |
|                                                         |                                                     |
| Rules_132                                               | passed counts:1                                     |
| node_0: feature_name=HuIgG_0.10                         | feature_id[9].value > threshold=19120.166015625     |
| node_92: feature_name=a-HuIgG_0.03                      | feature_id[14].value <= threshold=19665.666015625   |
| node_93: feature_name=SARS.CoV.2.Spike.RBD.His.HEK      | feature_id[4].value > threshold=3.0166666507720947  |
| node_105: feature_name=SARS.CoV.2.S1.mFcTag             | feature_id[0].value > threshold=54010.166015625     |
| node_305: feature_name=a-MoIgG_0.10                     | feature_id[16].value > threshold=2382.8333740234375 |
| node_309: feature_name=SARS.CoV.S1.HisTag               | feature_id[15].value > threshold=23460.3330078125   |
| node_365: feature_name=a-HuIgG_0.03                     | feature_id[14].value > threshold=11128.66650390625  |
| node_367: feature_name=SARS.CoV.2.S1.mFcTag             | feature_id[0].value > threshold=54294.0             |
| node_371: feature_name=SARS.CoV.2.S1.mFcTag             | feature_id[0].value <= threshold=55620.833984375    |
| node_372: feature_name=a-HuIgG_0.10                     | feature_id[13].value > threshold=28320.6669921875   |
| node_374: feature_name=SARS.CoV.2.S1                    | feature_id[6].value <= threshold=47335.5            |
| Class: healthcare workers 60–180 days after vaccination |                                                     |
|                                                         |                                                     |
| Rules_133                                               | passed counts:1                                     |
| node_0: feature_name=HuIgG_0.10                         | feature_id[9].value > threshold=19120.166015625     |
| node_92: feature_name=a-HuIgG_0.03                      | feature_id[14].value <= threshold=19665.666015625   |
| node_93: feature_name=SARS.CoV.2.Spike.RBD.His.HEK      | feature_id[4].value > threshold=3.0166666507720947  |
| node_105: feature_name=SARS.CoV.2.S1.mFcTag             | feature_id[0].value > threshold=54010.166015625     |
| node_305: feature_name=a-MoIgG_0.10                     | feature_id[16].value > threshold=2382.8333740234375 |
| node_309: feature_name=SARS.CoV.S1.HisTag               | feature_id[15].value > threshold=23460.3330078125   |
| node_365: feature_name=a-HuIgG_0.03                     | feature_id[14].value > threshold=11128.66650390625  |



|                                                         |                                                     |
|---------------------------------------------------------|-----------------------------------------------------|
| node_367: feature_name=SARS.CoV.2.S1.mFcTag             | feature_id[0].value > threshold=54294.0             |
| node_371: feature_name=SARS.CoV.2.S1.mFcTag             | feature_id[0].value <= threshold=55620.833984375    |
| node_372: feature_name=a-HuIgG_0.10                     | feature_id[13].value <= threshold=28320.6669921875  |
| Class: healthcare workers 60–180 days after vaccination |                                                     |
| Rules_134                                               | passed counts:1                                     |
| node_0: feature_name=HuIgG_0.10                         | feature_id[9].value > threshold=19120.166015625     |
| node_92: feature_name=a-HuIgG_0.03                      | feature_id[14].value <= threshold=19665.666015625   |
| node_93: feature_name=SARS.CoV.2.Spike.RBD.His.HEK      | feature_id[4].value > threshold=3.0166666507720947  |
| node_105: feature_name=SARS.CoV.2.S1.mFcTag             | feature_id[0].value > threshold=54010.166015625     |
| node_305: feature_name=a-MoIgG_0.10                     | feature_id[16].value > threshold=2382.8333740234375 |
| node_309: feature_name=SARS.CoV.S1.HisTag               | feature_id[15].value <= threshold=23460.3330078125  |
| node_310: feature_name=HuIgG_0.03                       | feature_id[8].value > threshold=6941.33349609375    |
| node_362: feature_name=SARS.CoV.2.Spike.RBD.His.Bac     | feature_id[3].value > threshold=43627.66796875      |
| Class: unvaccinated healthcare workers                  |                                                     |
| Rules_135                                               | passed counts:1                                     |
| node_0: feature_name=HuIgG_0.10                         | feature_id[9].value > threshold=19120.166015625     |
| node_92: feature_name=a-HuIgG_0.03                      | feature_id[14].value <= threshold=19665.666015625   |
| node_93: feature_name=SARS.CoV.2.Spike.RBD.His.HEK      | feature_id[4].value > threshold=3.0166666507720947  |
| node_105: feature_name=SARS.CoV.2.S1.mFcTag             | feature_id[0].value > threshold=54010.166015625     |
| node_305: feature_name=a-MoIgG_0.10                     | feature_id[16].value > threshold=2382.8333740234375 |
| node_309: feature_name=SARS.CoV.S1.HisTag               | feature_id[15].value <= threshold=23460.3330078125  |
| node_310: feature_name=HuIgG_0.03                       | feature_id[8].value <= threshold=6941.33349609375   |
| node_311: feature_name=a-HuIgG_0.10                     | feature_id[13].value > threshold=32620.5            |

|                                                            |                                                      |
|------------------------------------------------------------|------------------------------------------------------|
| node_351: feature_name=SARS.CoV.S1.RBD.HisTag              | feature_id[10].value > threshold=13834.0             |
| node_359: feature_name=HuIgG_0.30                          | feature_id[12].value <= threshold=39323.666015625    |
| Class: unvaccinated healthcare workers                     |                                                      |
|                                                            |                                                      |
| Rules_136                                                  | passed counts:1                                      |
| node_0: feature_name=HuIgG_0.10                            | feature_id[9].value > threshold=19120.166015625      |
| node_92: feature_name=a-HuIgG_0.03                         | feature_id[14].value <= threshold=19665.666015625    |
| node_93: feature_name=SARS.CoV.2.Spike.RBD.His.HEK         | feature_id[4].value > threshold=3.0166666507720947   |
| node_105: feature_name=SARS.CoV.2.S1.mFcTag                | feature_id[0].value > threshold=54010.166015625      |
| node_305: feature_name=a-MoIgG_0.10                        | feature_id[16].value > threshold=2382.8333740234375  |
| node_309: feature_name=SARS.CoV.S1.HisTag                  | feature_id[15].value <= threshold=23460.3330078125   |
| node_310: feature_name=HuIgG_0.03                          | feature_id[8].value <= threshold=6941.33349609375    |
| node_311: feature_name=a-HuIgG_0.10                        | feature_id[13].value > threshold=32620.5             |
| node_351: feature_name=SARS.CoV.S1.RBD.HisTag              | feature_id[10].value <= threshold=13834.0            |
| node_352: feature_name=SARS.CoV.2.S1                       | feature_id[6].value <= threshold=47365.833984375     |
| node_353: feature_name=SARS.CoV.2.Spike.RBD.His.HEK        | feature_id[4].value <= threshold=29192.4169921875    |
| node_354: feature_name=a-MoIgG_0.10                        | feature_id[16].value <= threshold=3888.6666259765625 |
| Class: healthcare workers within 60 days after vaccination |                                                      |
|                                                            |                                                      |
| Rules_137                                                  | passed counts:1                                      |
| node_0: feature_name=HuIgG_0.10                            | feature_id[9].value > threshold=19120.166015625      |
| node_92: feature_name=a-HuIgG_0.03                         | feature_id[14].value <= threshold=19665.666015625    |
| node_93: feature_name=SARS.CoV.2.Spike.RBD.His.HEK         | feature_id[4].value > threshold=3.0166666507720947   |
| node_105: feature_name=SARS.CoV.2.S1.mFcTag                | feature_id[0].value > threshold=54010.166015625      |
| node_305: feature_name=a-MoIgG_0.10                        | feature_id[16].value > threshold=2382.8333740234375  |

|                                                            |                                                     |
|------------------------------------------------------------|-----------------------------------------------------|
| node_309: feature_name=SARS.CoV.S1.HisTag                  | feature_id[15].value <= threshold=23460.3330078125  |
| node_310: feature_name=HuIgG_0.03                          | feature_id[8].value <= threshold=6941.33349609375   |
| node_311: feature_name=a-HuIgG_0.10                        | feature_id[13].value <= threshold=32620.5           |
| node_312: feature_name=SARS.CoV.2.Spike.RBD.His.Bac        | feature_id[3].value > threshold=31266.0             |
| node_320: feature_name=a-HuIgG_0.30                        | feature_id[11].value > threshold=47574.66796875     |
| node_346: feature_name=a-HuIgG_0.10                        | feature_id[13].value > threshold=28994.833984375    |
| node_348: feature_name=HuIgG_0.30                          | feature_id[12].value > threshold=47369.0            |
| Class: healthcare workers within 60 days after vaccination |                                                     |
|                                                            |                                                     |
| Rules_138                                                  | passed counts:1                                     |
| node_0: feature_name=HuIgG_0.10                            | feature_id[9].value > threshold=19120.166015625     |
| node_92: feature_name=a-HuIgG_0.03                         | feature_id[14].value <= threshold=19665.666015625   |
| node_93: feature_name=SARS.CoV.2.Spike.RBD.His.HEK         | feature_id[4].value > threshold=3.016666507720947   |
| node_105: feature_name=SARS.CoV.2.S1.mFcTag                | feature_id[0].value > threshold=54010.166015625     |
| node_305: feature_name=a-MoIgG_0.10                        | feature_id[16].value > threshold=2382.8333740234375 |
| node_309: feature_name=SARS.CoV.S1.HisTag                  | feature_id[15].value <= threshold=23460.3330078125  |
| node_310: feature_name=HuIgG_0.03                          | feature_id[8].value <= threshold=6941.33349609375   |
| node_311: feature_name=a-HuIgG_0.10                        | feature_id[13].value <= threshold=32620.5           |
| node_312: feature_name=SARS.CoV.2.Spike.RBD.His.Bac        | feature_id[3].value > threshold=31266.0             |
| node_320: feature_name=a-HuIgG_0.30                        | feature_id[11].value > threshold=47574.66796875     |
| node_346: feature_name=a-HuIgG_0.10                        | feature_id[13].value <= threshold=28994.833984375   |
| Class: healthcare workers within 60 days after vaccination |                                                     |
|                                                            |                                                     |
| Rules_139                                                  | passed counts:1                                     |
| node_0: feature_name=HuIgG_0.10                            | feature_id[9].value > threshold=19120.166015625     |

|                                                         |                                                     |
|---------------------------------------------------------|-----------------------------------------------------|
| node_92: feature_name=a-HuIgG_0.03                      | feature_id[14].value <= threshold=19665.666015625   |
| node_93: feature_name=SARS.CoV.2.Spike.RBD.His.HEK      | feature_id[4].value > threshold=3.0166666507720947  |
| node_105: feature_name=SARS.CoV.2.S1.mFcTag             | feature_id[0].value > threshold=54010.166015625     |
| node_305: feature_name=a-MoIgG_0.10                     | feature_id[16].value > threshold=2382.8333740234375 |
| node_309: feature_name=SARS.CoV.S1.HisTag               | feature_id[15].value <= threshold=23460.3330078125  |
| node_310: feature_name=HuIgG_0.03                       | feature_id[8].value <= threshold=6941.33349609375   |
| node_311: feature_name=a-HuIgG_0.10                     | feature_id[13].value <= threshold=32620.5           |
| node_312: feature_name=SARS.CoV.2.Spike.RBD.His.Bac     | feature_id[3].value > threshold=31266.0             |
| node_320: feature_name=a-HuIgG_0.30                     | feature_id[11].value <= threshold=47574.66796875    |
| node_321: feature_name=SARS.CoV.2.S1.RBD.mFc            | feature_id[1].value > threshold=47171.166015625     |
| node_323: feature_name=SARS.CoV.2.Spike.RBD.His.Bac     | feature_id[3].value > threshold=32929.0             |
| node_325: feature_name=SARS.CoV.2.Spike.RBD.His.Bac     | feature_id[3].value > threshold=37127.798828125     |
| node_333: feature_name=a-HuIgG_0.10                     | feature_id[13].value > threshold=30243.0            |
| node_339: feature_name=a-HuIgG_0.10                     | feature_id[13].value > threshold=31594.5            |
| node_343: feature_name=SARS.CoV.2.Spike.RBD.His.HEK     | feature_id[4].value <= threshold=38606.166015625    |
| Class: healthcare workers 60–180 days after vaccination |                                                     |
|                                                         |                                                     |
| Rules_140                                               | passed counts:1                                     |
| node_0: feature_name=HuIgG_0.10                         | feature_id[9].value > threshold=19120.166015625     |
| node_92: feature_name=a-HuIgG_0.03                      | feature_id[14].value <= threshold=19665.666015625   |
| node_93: feature_name=SARS.CoV.2.Spike.RBD.His.HEK      | feature_id[4].value > threshold=3.0166666507720947  |
| node_105: feature_name=SARS.CoV.2.S1.mFcTag             | feature_id[0].value > threshold=54010.166015625     |
| node_305: feature_name=a-MoIgG_0.10                     | feature_id[16].value > threshold=2382.8333740234375 |
| node_309: feature_name=SARS.CoV.S1.HisTag               | feature_id[15].value <= threshold=23460.3330078125  |
| node_310: feature_name=HuIgG_0.03                       | feature_id[8].value <= threshold=6941.33349609375   |

|                                                            |                                                     |
|------------------------------------------------------------|-----------------------------------------------------|
| node_311: feature_name=a-HuIgG_0.10                        | feature_id[13].value <= threshold=32620.5           |
| node_312: feature_name=SARS.CoV.2.Spike.RBD.His.Bac        | feature_id[3].value > threshold=31266.0             |
| node_320: feature_name=a-HuIgG_0.30                        | feature_id[11].value <= threshold=47574.66796875    |
| node_321: feature_name=SARS.CoV.2.S1.RBD.mFc               | feature_id[1].value > threshold=47171.166015625     |
| node_323: feature_name=SARS.CoV.2.Spike.RBD.His.Bac        | feature_id[3].value > threshold=32929.0             |
| node_325: feature_name=SARS.CoV.2.Spike.RBD.His.Bac        | feature_id[3].value > threshold=37127.798828125     |
| node_333: feature_name=a-HuIgG_0.10                        | feature_id[13].value > threshold=30243.0            |
| node_339: feature_name=a-HuIgG_0.10                        | feature_id[13].value <= threshold=31594.5           |
| node_340: feature_name=SARS.CoV.2.S1.RBD.mFc               | feature_id[1].value > threshold=53514.666015625     |
| Class: healthcare workers within 60 days after vaccination |                                                     |
|                                                            |                                                     |
| Rules_141                                                  | passed counts:1                                     |
| node_0: feature_name=HuIgG_0.10                            | feature_id[9].value > threshold=19120.166015625     |
| node_92: feature_name=a-HuIgG_0.03                         | feature_id[14].value <= threshold=19665.666015625   |
| node_93: feature_name=SARS.CoV.2.Spike.RBD.His.HEK         | feature_id[4].value > threshold=3.016666507720947   |
| node_105: feature_name=SARS.CoV.2.S1.mFcTag                | feature_id[0].value > threshold=54010.166015625     |
| node_305: feature_name=a-MoIgG_0.10                        | feature_id[16].value > threshold=2382.8333740234375 |
| node_309: feature_name=SARS.CoV.S1.HisTag                  | feature_id[15].value <= threshold=23460.3330078125  |
| node_310: feature_name=HuIgG_0.03                          | feature_id[8].value <= threshold=6941.33349609375   |
| node_311: feature_name=a-HuIgG_0.10                        | feature_id[13].value <= threshold=32620.5           |
| node_312: feature_name=SARS.CoV.2.Spike.RBD.His.Bac        | feature_id[3].value > threshold=31266.0             |
| node_320: feature_name=a-HuIgG_0.30                        | feature_id[11].value <= threshold=47574.66796875    |
| node_321: feature_name=SARS.CoV.2.S1.RBD.mFc               | feature_id[1].value > threshold=47171.166015625     |
| node_323: feature_name=SARS.CoV.2.Spike.RBD.His.Bac        | feature_id[3].value > threshold=32929.0             |
| node_325: feature_name=SARS.CoV.2.Spike.RBD.His.Bac        | feature_id[3].value <= threshold=37127.798828125    |

|                                                         |                                                     |
|---------------------------------------------------------|-----------------------------------------------------|
| node_326: feature_name=SARS.CoV.2.S1+S2                 | feature_id[7].value > threshold=49134.966796875     |
| node_328: feature_name=SARS.CoV.2.Spike.RBD.His.HEK     | feature_id[4].value > threshold=35038.25            |
| node_330: feature_name=SARS.CoV.2.S1+S2                 | feature_id[7].value <= threshold=52119.966796875    |
| Class: healthcare workers 60–180 days after vaccination |                                                     |
|                                                         |                                                     |
| Rules_142                                               | passed counts:1                                     |
| node_0: feature_name=HuIgG_0.10                         | feature_id[9].value > threshold=19120.166015625     |
| node_92: feature_name=a-HuIgG_0.03                      | feature_id[14].value <= threshold=19665.666015625   |
| node_93: feature_name=SARS.CoV.2.Spike.RBD.His.HEK      | feature_id[4].value > threshold=3.0166666507720947  |
| node_105: feature_name=SARS.CoV.2.S1.mFcTag             | feature_id[0].value > threshold=54010.166015625     |
| node_305: feature_name=a-MoIgG_0.10                     | feature_id[16].value > threshold=2382.8333740234375 |
| node_309: feature_name=SARS.CoV.S1.HisTag               | feature_id[15].value <= threshold=23460.3330078125  |
| node_310: feature_name=HuIgG_0.03                       | feature_id[8].value <= threshold=6941.33349609375   |
| node_311: feature_name=a-HuIgG_0.10                     | feature_id[13].value <= threshold=32620.5           |
| node_312: feature_name=SARS.CoV.2.Spike.RBD.His.Bac     | feature_id[3].value > threshold=31266.0             |
| node_320: feature_name=a-HuIgG_0.30                     | feature_id[11].value <= threshold=47574.66796875    |
| node_321: feature_name=SARS.CoV.2.S1.RBD.mFc            | feature_id[1].value > threshold=47171.166015625     |
| node_323: feature_name=SARS.CoV.2.Spike.RBD.His.Bac     | feature_id[3].value > threshold=32929.0             |
| node_325: feature_name=SARS.CoV.2.Spike.RBD.His.Bac     | feature_id[3].value <= threshold=37127.798828125    |
| node_326: feature_name=SARS.CoV.2.S1+S2                 | feature_id[7].value <= threshold=49134.966796875    |
| Class: healthcare workers 60–180 days after vaccination |                                                     |
|                                                         |                                                     |
| Rules_143                                               | passed counts:1                                     |
| node_0: feature_name=HuIgG_0.10                         | feature_id[9].value > threshold=19120.166015625     |
| node_92: feature_name=a-HuIgG_0.03                      | feature_id[14].value <= threshold=19665.666015625   |

|                                                            |                                                     |
|------------------------------------------------------------|-----------------------------------------------------|
| node_93: feature_name=SARS.CoV.2.Spike.RBD.His.HEK         | feature_id[4].value > threshold=3.0166666507720947  |
| node_105: feature_name=SARS.CoV.2.S1.mFcTag                | feature_id[0].value > threshold=54010.166015625     |
| node_305: feature_name=a-MoIgG_0.10                        | feature_id[16].value > threshold=2382.8333740234375 |
| node_309: feature_name=SARS.CoV.S1.HisTag                  | feature_id[15].value <= threshold=23460.3330078125  |
| node_310: feature_name=HuIgG_0.03                          | feature_id[8].value <= threshold=6941.33349609375   |
| node_311: feature_name=a-HuIgG_0.10                        | feature_id[13].value <= threshold=32620.5           |
| node_312: feature_name=SARS.CoV.2.Spike.RBD.His.Bac        | feature_id[3].value <= threshold=31266.0            |
| node_313: feature_name=HuIgG_0.10                          | feature_id[9].value > threshold=22308.5             |
| node_317: feature_name=SARS.CoV.2.Spike.RBD.rFc            | feature_id[5].value > threshold=47206.232421875     |
| Class: healthcare workers 60–180 days after vaccination    |                                                     |
|                                                            |                                                     |
| Rules_144                                                  | passed counts:1                                     |
| node_0: feature_name=HuIgG_0.10                            | feature_id[9].value > threshold=19120.166015625     |
| node_92: feature_name=a-HuIgG_0.03                         | feature_id[14].value <= threshold=19665.666015625   |
| node_93: feature_name=SARS.CoV.2.Spike.RBD.His.HEK         | feature_id[4].value > threshold=3.0166666507720947  |
| node_105: feature_name=SARS.CoV.2.S1.mFcTag                | feature_id[0].value > threshold=54010.166015625     |
| node_305: feature_name=a-MoIgG_0.10                        | feature_id[16].value > threshold=2382.8333740234375 |
| node_309: feature_name=SARS.CoV.S1.HisTag                  | feature_id[15].value <= threshold=23460.3330078125  |
| node_310: feature_name=HuIgG_0.03                          | feature_id[8].value <= threshold=6941.33349609375   |
| node_311: feature_name=a-HuIgG_0.10                        | feature_id[13].value <= threshold=32620.5           |
| node_312: feature_name=SARS.CoV.2.Spike.RBD.His.Bac        | feature_id[3].value <= threshold=31266.0            |
| node_313: feature_name=HuIgG_0.10                          | feature_id[9].value <= threshold=22308.5            |
| node_314: feature_name=a-MoIgG_0.10                        | feature_id[16].value > threshold=7511.833251953125  |
| Class: healthcare workers within 60 days after vaccination |                                                     |
|                                                            |                                                     |

|                                                         |                                                      |
|---------------------------------------------------------|------------------------------------------------------|
| Rules_145                                               | passed counts:1                                      |
| node_0: feature_name=HuIgG_0.10                         | feature_id[9].value > threshold=19120.166015625      |
| node_92: feature_name=a-HuIgG_0.03                      | feature_id[14].value <= threshold=19665.666015625    |
| node_93: feature_name=SARS.CoV.2.Spike.RBD.His.HEK      | feature_id[4].value > threshold=3.016666507720947    |
| node_105: feature_name=SARS.CoV.2.S1.mFcTag             | feature_id[0].value > threshold=54010.166015625      |
| node_305: feature_name=a-MoIgG_0.10                     | feature_id[16].value <= threshold=2382.8333740234375 |
| node_306: feature_name=SARS.CoV.2.S1                    | feature_id[6].value <= threshold=34987.400390625     |
| Class: healthcare workers 60–180 days after vaccination |                                                      |
|                                                         |                                                      |
| Rules_146                                               | passed counts:1                                      |
| node_0: feature_name=HuIgG_0.10                         | feature_id[9].value > threshold=19120.166015625      |
| node_92: feature_name=a-HuIgG_0.03                      | feature_id[14].value <= threshold=19665.666015625    |
| node_93: feature_name=SARS.CoV.2.Spike.RBD.His.HEK      | feature_id[4].value > threshold=3.016666507720947    |
| node_105: feature_name=SARS.CoV.2.S1.mFcTag             | feature_id[0].value <= threshold=54010.166015625     |
| node_106: feature_name=SARS.CoV.2.S1+S2                 | feature_id[7].value > threshold=48317.708984375      |
| node_228: feature_name=a-MoIgG_0.10                     | feature_id[16].value > threshold=1652.5              |
| node_230: feature_name=HuIgG_0.10                       | feature_id[9].value <= threshold=30107.666015625     |
| node_231: feature_name=HuIgG_0.03                       | feature_id[8].value > threshold=5533.83349609375     |
| node_247: feature_name=HuIgG_0.10                       | feature_id[9].value > threshold=24231.0              |
| node_261: feature_name=SARS.CoV.S1.RBD.HisTag           | feature_id[10].value > threshold=24179.0419921875    |
| node_293: feature_name=SARS.CoV.2.S1.HisTag             | feature_id[2].value > threshold=54233.25             |
| Class: healthcare workers 60–180 days after vaccination |                                                      |
|                                                         |                                                      |
| Rules_147                                               | passed counts:1                                      |
| node_0: feature_name=HuIgG_0.10                         | feature_id[9].value > threshold=19120.166015625      |



|                                                         |                                                    |
|---------------------------------------------------------|----------------------------------------------------|
| node_92: feature_name=a-HuIgG_0.03                      | feature_id[14].value <= threshold=19665.666015625  |
| node_93: feature_name=SARS.CoV.2.Spike.RBD.His.HEK      | feature_id[4].value > threshold=3.0166666507720947 |
| node_105: feature_name=SARS.CoV.2.S1.mFcTag             | feature_id[0].value <= threshold=54010.166015625   |
| node_106: feature_name=SARS.CoV.2.S1+S2                 | feature_id[7].value > threshold=48317.708984375    |
| node_228: feature_name=a-MoIgG_0.10                     | feature_id[16].value > threshold=1652.5            |
| node_230: feature_name=HuIgG_0.10                       | feature_id[9].value <= threshold=30107.666015625   |
| node_231: feature_name=HuIgG_0.03                       | feature_id[8].value > threshold=5533.83349609375   |
| node_247: feature_name=HuIgG_0.10                       | feature_id[9].value > threshold=24231.0            |
| node_261: feature_name=SARS.CoV.S1.RBD.HisTag           | feature_id[10].value > threshold=24179.0419921875  |
| node_293: feature_name=SARS.CoV.2.S1.HisTag             | feature_id[2].value <= threshold=54233.25          |
| node_294: feature_name=SARS.CoV.2.S1.mFcTag             | feature_id[0].value > threshold=50885.83203125     |
| node_298: feature_name=a-HuIgG_0.30                     | feature_id[11].value <= threshold=40480.16796875   |
| node_299: feature_name=SARS.CoV.2.S1+S2                 | feature_id[7].value > threshold=52487.333984375    |
| Class: healthcare workers 60–180 days after vaccination |                                                    |
|                                                         |                                                    |
| Rules_148                                               | passed counts:1                                    |
| node_0: feature_name=HuIgG_0.10                         | feature_id[9].value > threshold=19120.166015625    |
| node_92: feature_name=a-HuIgG_0.03                      | feature_id[14].value <= threshold=19665.666015625  |
| node_93: feature_name=SARS.CoV.2.Spike.RBD.His.HEK      | feature_id[4].value > threshold=3.0166666507720947 |
| node_105: feature_name=SARS.CoV.2.S1.mFcTag             | feature_id[0].value <= threshold=54010.166015625   |
| node_106: feature_name=SARS.CoV.2.S1+S2                 | feature_id[7].value > threshold=48317.708984375    |
| node_228: feature_name=a-MoIgG_0.10                     | feature_id[16].value > threshold=1652.5            |
| node_230: feature_name=HuIgG_0.10                       | feature_id[9].value <= threshold=30107.666015625   |
| node_231: feature_name=HuIgG_0.03                       | feature_id[8].value > threshold=5533.83349609375   |
| node_247: feature_name=HuIgG_0.10                       | feature_id[9].value > threshold=24231.0            |

|                                                            |                                                   |
|------------------------------------------------------------|---------------------------------------------------|
| node_261: feature_name=SARS.CoV.S1.RBD.HisTag              | feature_id[10].value > threshold=24179.0419921875 |
| node_293: feature_name=SARS.CoV.2.S1.HisTag                | feature_id[2].value <= threshold=54233.25         |
| node_294: feature_name=SARS.CoV.2.S1.mFcTag                | feature_id[0].value <= threshold=50885.83203125   |
| node_295: feature_name=SARS.CoV.2.S1                       | feature_id[6].value > threshold=50233.8828125     |
| Class: healthcare workers over 180 days after vaccination  |                                                   |
|                                                            |                                                   |
| Rules_149                                                  | passed counts:1                                   |
| node_0: feature_name=HuIgG_0.10                            | feature_id[9].value > threshold=19120.166015625   |
| node_92: feature_name=a-HuIgG_0.03                         | feature_id[14].value <= threshold=19665.666015625 |
| node_93: feature_name=SARS.CoV.2.Spike.RBD.His.HEK         | feature_id[4].value > threshold=3.016666507720947 |
| node_105: feature_name=SARS.CoV.2.S1.mFcTag                | feature_id[0].value <= threshold=54010.166015625  |
| node_106: feature_name=SARS.CoV.2.S1+S2                    | feature_id[7].value > threshold=48317.708984375   |
| node_228: feature_name=a-MoIgG_0.10                        | feature_id[16].value > threshold=1652.5           |
| node_230: feature_name=HuIgG_0.10                          | feature_id[9].value <= threshold=30107.666015625  |
| node_231: feature_name=HuIgG_0.03                          | feature_id[8].value > threshold=5533.83349609375  |
| node_247: feature_name=HuIgG_0.10                          | feature_id[9].value > threshold=24231.0           |
| node_261: feature_name=SARS.CoV.S1.RBD.HisTag              | feature_id[10].value > threshold=24179.0419921875 |
| node_293: feature_name=SARS.CoV.2.S1.HisTag                | feature_id[2].value <= threshold=54233.25         |
| node_294: feature_name=SARS.CoV.2.S1.mFcTag                | feature_id[0].value <= threshold=50885.83203125   |
| node_295: feature_name=SARS.CoV.2.S1                       | feature_id[6].value <= threshold=50233.8828125    |
| Class: healthcare workers within 60 days after vaccination |                                                   |
|                                                            |                                                   |
| Rules_150                                                  | passed counts:1                                   |
| node_0: feature_name=HuIgG_0.10                            | feature_id[9].value > threshold=19120.166015625   |
| node_92: feature_name=a-HuIgG_0.03                         | feature_id[14].value <= threshold=19665.666015625 |

|                                                            |                                                    |
|------------------------------------------------------------|----------------------------------------------------|
| node_93: feature_name=SARS.CoV.2.Spike.RBD.His.HEK         | feature_id[4].value > threshold=3.0166666507720947 |
| node_105: feature_name=SARS.CoV.2.S1.mFcTag                | feature_id[0].value <= threshold=54010.166015625   |
| node_106: feature_name=SARS.CoV.2.S1+S2                    | feature_id[7].value > threshold=48317.708984375    |
| node_228: feature_name=a-MoIgG_0.10                        | feature_id[16].value > threshold=1652.5            |
| node_230: feature_name=HuIgG_0.10                          | feature_id[9].value <= threshold=30107.666015625   |
| node_231: feature_name=HuIgG_0.03                          | feature_id[8].value > threshold=5533.83349609375   |
| node_247: feature_name=HuIgG_0.10                          | feature_id[9].value > threshold=24231.0            |
| node_261: feature_name=SARS.CoV.S1.RBD.HisTag              | feature_id[10].value <= threshold=24179.0419921875 |
| node_262: feature_name=HuIgG_0.10                          | feature_id[9].value > threshold=25555.333984375    |
| node_266: feature_name=HuIgG_0.10                          | feature_id[9].value > threshold=25659.6669921875   |
| node_270: feature_name=SARS.CoV.S1.HisTag                  | feature_id[15].value > threshold=10000.5830078125  |
| node_276: feature_name=SARS.CoV.S1.HisTag                  | feature_id[15].value > threshold=13228.125         |
| node_286: feature_name=a-MoIgG_0.10                        | feature_id[16].value > threshold=10763.83349609375 |
| node_290: feature_name=HuIgG_0.10                          | feature_id[9].value > threshold=27228.1669921875   |
| Class: healthcare workers within 60 days after vaccination |                                                    |
|                                                            |                                                    |
| Rules_151                                                  | passed counts:1                                    |
| node_0: feature_name=HuIgG_0.10                            | feature_id[9].value > threshold=19120.166015625    |
| node_92: feature_name=a-HuIgG_0.03                         | feature_id[14].value <= threshold=19665.666015625  |
| node_93: feature_name=SARS.CoV.2.Spike.RBD.His.HEK         | feature_id[4].value > threshold=3.0166666507720947 |
| node_105: feature_name=SARS.CoV.2.S1.mFcTag                | feature_id[0].value <= threshold=54010.166015625   |
| node_106: feature_name=SARS.CoV.2.S1+S2                    | feature_id[7].value > threshold=48317.708984375    |
| node_228: feature_name=a-MoIgG_0.10                        | feature_id[16].value > threshold=1652.5            |
| node_230: feature_name=HuIgG_0.10                          | feature_id[9].value <= threshold=30107.666015625   |
| node_231: feature_name=HuIgG_0.03                          | feature_id[8].value > threshold=5533.83349609375   |

|                                                         |                                                     |
|---------------------------------------------------------|-----------------------------------------------------|
| node_247: feature_name=HuIgG_0.10                       | feature_id[9].value > threshold=24231.0             |
| node_261: feature_name=SARS.CoV.S1.RBD.HisTag           | feature_id[10].value <= threshold=24179.0419921875  |
| node_262: feature_name=HuIgG_0.10                       | feature_id[9].value > threshold=25555.333984375     |
| node_266: feature_name=HuIgG_0.10                       | feature_id[9].value > threshold=25659.6669921875    |
| node_270: feature_name=SARS.CoV.S1.HisTag               | feature_id[15].value > threshold=10000.5830078125   |
| node_276: feature_name=SARS.CoV.S1.HisTag               | feature_id[15].value > threshold=13228.125          |
| node_286: feature_name=a-MoIgG_0.10                     | feature_id[16].value <= threshold=10763.83349609375 |
| node_287: feature_name=SARS.CoV.2.Spike.RBD.His.HEK     | feature_id[4].value > threshold=46379.583984375     |
| Class: healthcare workers 60–180 days after vaccination |                                                     |
|                                                         |                                                     |
| Rules_152                                               | passed counts:1                                     |
| node_0: feature_name=HuIgG_0.10                         | feature_id[9].value > threshold=19120.166015625     |
| node_92: feature_name=a-HuIgG_0.03                      | feature_id[14].value <= threshold=19665.666015625   |
| node_93: feature_name=SARS.CoV.2.Spike.RBD.His.HEK      | feature_id[4].value > threshold=3.016666507720947   |
| node_105: feature_name=SARS.CoV.2.S1.mFcTag             | feature_id[0].value <= threshold=54010.166015625    |
| node_106: feature_name=SARS.CoV.2.S1+S2                 | feature_id[7].value > threshold=48317.708984375     |
| node_228: feature_name=a-MoIgG_0.10                     | feature_id[16].value > threshold=1652.5             |
| node_230: feature_name=HuIgG_0.10                       | feature_id[9].value <= threshold=30107.666015625    |
| node_231: feature_name=HuIgG_0.03                       | feature_id[8].value > threshold=5533.83349609375    |
| node_247: feature_name=HuIgG_0.10                       | feature_id[9].value > threshold=24231.0             |
| node_261: feature_name=SARS.CoV.S1.RBD.HisTag           | feature_id[10].value <= threshold=24179.0419921875  |
| node_262: feature_name=HuIgG_0.10                       | feature_id[9].value > threshold=25555.333984375     |
| node_266: feature_name=HuIgG_0.10                       | feature_id[9].value > threshold=25659.6669921875    |
| node_270: feature_name=SARS.CoV.S1.HisTag               | feature_id[15].value > threshold=10000.5830078125   |
| node_276: feature_name=SARS.CoV.S1.HisTag               | feature_id[15].value <= threshold=13228.125         |

|                                                            |                                                    |
|------------------------------------------------------------|----------------------------------------------------|
| node_277: feature_name=SARS.CoV.2.Spike.RBD.His.Bac        | feature_id[3].value > threshold=33671.91796875     |
| node_279: feature_name=SARS.CoV.2.S1.RBD.mFc               | feature_id[1].value > threshold=52697.666015625    |
| Class: healthcare workers within 60 days after vaccination |                                                    |
|                                                            |                                                    |
| Rules_153                                                  | passed counts:1                                    |
| node_0: feature_name=HuIgG_0.10                            | feature_id[9].value > threshold=19120.166015625    |
| node_92: feature_name=a-HuIgG_0.03                         | feature_id[14].value <= threshold=19665.666015625  |
| node_93: feature_name=SARS.CoV.2.Spike.RBD.His.HEK         | feature_id[4].value > threshold=3.016666507720947  |
| node_105: feature_name=SARS.CoV.2.S1.mFcTag                | feature_id[0].value <= threshold=54010.166015625   |
| node_106: feature_name=SARS.CoV.2.S1+S2                    | feature_id[7].value > threshold=48317.708984375    |
| node_228: feature_name=a-MoIgG_0.10                        | feature_id[16].value > threshold=1652.5            |
| node_230: feature_name=HuIgG_0.10                          | feature_id[9].value <= threshold=30107.666015625   |
| node_231: feature_name=HuIgG_0.03                          | feature_id[8].value > threshold=5533.83349609375   |
| node_247: feature_name=HuIgG_0.10                          | feature_id[9].value > threshold=24231.0            |
| node_261: feature_name=SARS.CoV.S1.RBD.HisTag              | feature_id[10].value <= threshold=24179.0419921875 |
| node_262: feature_name=HuIgG_0.10                          | feature_id[9].value > threshold=25555.333984375    |
| node_266: feature_name=HuIgG_0.10                          | feature_id[9].value > threshold=25659.6669921875   |
| node_270: feature_name=SARS.CoV.S1.HisTag                  | feature_id[15].value > threshold=10000.5830078125  |
| node_276: feature_name=SARS.CoV.S1.HisTag                  | feature_id[15].value <= threshold=13228.125        |
| node_277: feature_name=SARS.CoV.2.Spike.RBD.His.Bac        | feature_id[3].value > threshold=33671.91796875     |
| node_279: feature_name=SARS.CoV.2.S1.RBD.mFc               | feature_id[1].value <= threshold=52697.666015625   |
| node_280: feature_name=SARS.CoV.2.Spike.RBD.His.Bac        | feature_id[3].value <= threshold=34984.25          |
| node_281: feature_name=a-HuIgG_0.03                        | feature_id[14].value > threshold=14962.0           |
| Class: healthcare workers within 60 days after vaccination |                                                    |
|                                                            |                                                    |

|                                                         |                                                    |
|---------------------------------------------------------|----------------------------------------------------|
| Rules_154                                               | passed counts:1                                    |
| node_0: feature_name=HuIgG_0.10                         | feature_id[9].value > threshold=19120.166015625    |
| node_92: feature_name=a-HuIgG_0.03                      | feature_id[14].value <= threshold=19665.666015625  |
| node_93: feature_name=SARS.CoV.2.Spike.RBD.His.HEK      | feature_id[4].value > threshold=3.016666507720947  |
| node_105: feature_name=SARS.CoV.2.S1.mFcTag             | feature_id[0].value <= threshold=54010.166015625   |
| node_106: feature_name=SARS.CoV.2.S1+S2                 | feature_id[7].value > threshold=48317.708984375    |
| node_228: feature_name=a-MoIgG_0.10                     | feature_id[16].value > threshold=1652.5            |
| node_230: feature_name=HuIgG_0.10                       | feature_id[9].value <= threshold=30107.666015625   |
| node_231: feature_name=HuIgG_0.03                       | feature_id[8].value > threshold=5533.83349609375   |
| node_247: feature_name=HuIgG_0.10                       | feature_id[9].value > threshold=24231.0            |
| node_261: feature_name=SARS.CoV.S1.RBD.HisTag           | feature_id[10].value <= threshold=24179.0419921875 |
| node_262: feature_name=HuIgG_0.10                       | feature_id[9].value > threshold=25555.333984375    |
| node_266: feature_name=HuIgG_0.10                       | feature_id[9].value > threshold=25659.6669921875   |
| node_270: feature_name=SARS.CoV.S1.HisTag               | feature_id[15].value > threshold=10000.5830078125  |
| node_276: feature_name=SARS.CoV.S1.HisTag               | feature_id[15].value <= threshold=13228.125        |
| node_277: feature_name=SARS.CoV.2.Spike.RBD.His.Bac     | feature_id[3].value > threshold=33671.91796875     |
| node_279: feature_name=SARS.CoV.2.S1.RBD.mFc            | feature_id[1].value <= threshold=52697.666015625   |
| node_280: feature_name=SARS.CoV.2.Spike.RBD.His.Bac     | feature_id[3].value <= threshold=34984.25          |
| node_281: feature_name=a-HuIgG_0.03                     | feature_id[14].value <= threshold=14962.0          |
| Class: healthcare workers 60–180 days after vaccination |                                                    |
|                                                         |                                                    |
| Rules_155                                               | passed counts:1                                    |
| node_0: feature_name=HuIgG_0.10                         | feature_id[9].value > threshold=19120.166015625    |
| node_92: feature_name=a-HuIgG_0.03                      | feature_id[14].value <= threshold=19665.666015625  |
| node_93: feature_name=SARS.CoV.2.Spike.RBD.His.HEK      | feature_id[4].value > threshold=3.016666507720947  |

|                                                            |                                                      |
|------------------------------------------------------------|------------------------------------------------------|
| node_105: feature_name=SARS.CoV.2.S1.mFcTag                | feature_id[0].value <= threshold=54010.166015625     |
| node_106: feature_name=SARS.CoV.2.S1+S2                    | feature_id[7].value > threshold=48317.708984375      |
| node_228: feature_name=a-MoIgG_0.10                        | feature_id[16].value > threshold=1652.5              |
| node_230: feature_name=HuIgG_0.10                          | feature_id[9].value <= threshold=30107.666015625     |
| node_231: feature_name=HuIgG_0.03                          | feature_id[8].value > threshold=5533.83349609375     |
| node_247: feature_name=HuIgG_0.10                          | feature_id[9].value > threshold=24231.0              |
| node_261: feature_name=SARS.CoV.S1.RBD.HisTag              | feature_id[10].value <= threshold=24179.0419921875   |
| node_262: feature_name=HuIgG_0.10                          | feature_id[9].value > threshold=25555.333984375      |
| node_266: feature_name=HuIgG_0.10                          | feature_id[9].value <= threshold=25659.6669921875    |
| node_267: feature_name=a-MoIgG_0.10                        | feature_id[16].value <= threshold=4330.1666259765625 |
| Class: healthcare workers within 60 days after vaccination |                                                      |
|                                                            |                                                      |
| Rules_156                                                  | passed counts:1                                      |
| node_0: feature_name=HuIgG_0.10                            | feature_id[9].value > threshold=19120.166015625      |
| node_92: feature_name=a-HuIgG_0.03                         | feature_id[14].value <= threshold=19665.666015625    |
| node_93: feature_name=SARS.CoV.2.Spike.RBD.His.HEK         | feature_id[4].value > threshold=3.0166666507720947   |
| node_105: feature_name=SARS.CoV.2.S1.mFcTag                | feature_id[0].value <= threshold=54010.166015625     |
| node_106: feature_name=SARS.CoV.2.S1+S2                    | feature_id[7].value > threshold=48317.708984375      |
| node_228: feature_name=a-MoIgG_0.10                        | feature_id[16].value > threshold=1652.5              |
| node_230: feature_name=HuIgG_0.10                          | feature_id[9].value <= threshold=30107.666015625     |
| node_231: feature_name=HuIgG_0.03                          | feature_id[8].value > threshold=5533.83349609375     |
| node_247: feature_name=HuIgG_0.10                          | feature_id[9].value > threshold=24231.0              |
| node_261: feature_name=SARS.CoV.S1.RBD.HisTag              | feature_id[10].value <= threshold=24179.0419921875   |
| node_262: feature_name=HuIgG_0.10                          | feature_id[9].value <= threshold=25555.333984375     |
| node_263: feature_name=SARS.CoV.2.S1+S2                    | feature_id[7].value > threshold=52323.916015625      |

|                                                         |                                                    |
|---------------------------------------------------------|----------------------------------------------------|
| Class: healthcare workers 60–180 days after vaccination |                                                    |
|                                                         |                                                    |
| Rules_157                                               | passed counts:1                                    |
| node_0: feature_name=HuIgG_0.10                         | feature_id[9].value > threshold=19120.166015625    |
| node_92: feature_name=a-HuIgG_0.03                      | feature_id[14].value <= threshold=19665.666015625  |
| node_93: feature_name=SARS.CoV.2.Spike.RBD.His.HEK      | feature_id[4].value > threshold=3.0166666507720947 |
| node_105: feature_name=SARS.CoV.2.S1.mFcTag             | feature_id[0].value <= threshold=54010.166015625   |
| node_106: feature_name=SARS.CoV.2.S1+S2                 | feature_id[7].value > threshold=48317.708984375    |
| node_228: feature_name=a-MoIgG_0.10                     | feature_id[16].value > threshold=1652.5            |
| node_230: feature_name=HuIgG_0.10                       | feature_id[9].value <= threshold=30107.666015625   |
| node_231: feature_name=HuIgG_0.03                       | feature_id[8].value > threshold=5533.83349609375   |
| node_247: feature_name=HuIgG_0.10                       | feature_id[9].value <= threshold=24231.0           |
| node_248: feature_name=SARS.CoV.2.S1.HisTag             | feature_id[2].value > threshold=43585.92578125     |
| node_256: feature_name=SARS.CoV.2.S1+S2                 | feature_id[7].value <= threshold=52592.591796875   |
| node_257: feature_name=SARS.CoV.2.S1.RBD.mFc            | feature_id[1].value <= threshold=43424.416015625   |
| Class: healthcare workers 60–180 days after vaccination |                                                    |
|                                                         |                                                    |
| Rules_158                                               | passed counts:1                                    |
| node_0: feature_name=HuIgG_0.10                         | feature_id[9].value > threshold=19120.166015625    |
| node_92: feature_name=a-HuIgG_0.03                      | feature_id[14].value <= threshold=19665.666015625  |
| node_93: feature_name=SARS.CoV.2.Spike.RBD.His.HEK      | feature_id[4].value > threshold=3.0166666507720947 |
| node_105: feature_name=SARS.CoV.2.S1.mFcTag             | feature_id[0].value <= threshold=54010.166015625   |
| node_106: feature_name=SARS.CoV.2.S1+S2                 | feature_id[7].value > threshold=48317.708984375    |
| node_228: feature_name=a-MoIgG_0.10                     | feature_id[16].value > threshold=1652.5            |
| node_230: feature_name=HuIgG_0.10                       | feature_id[9].value <= threshold=30107.666015625   |



|                                                            |                                                    |
|------------------------------------------------------------|----------------------------------------------------|
| node_231: feature_name=HuIgG_0.03                          | feature_id[8].value > threshold=5533.83349609375   |
| node_247: feature_name=HuIgG_0.10                          | feature_id[9].value <= threshold=24231.0           |
| node_248: feature_name=SARS.CoV.2.S1.HisTag                | feature_id[2].value <= threshold=43585.92578125    |
| node_249: feature_name=HuIgG_0.10                          | feature_id[9].value <= threshold=23668.3330078125  |
| node_250: feature_name=SARS.CoV.2.S1+S2                    | feature_id[7].value > threshold=49682.4921875      |
| node_252: feature_name=a-HuIgG_0.30                        | feature_id[11].value > threshold=39201.833984375   |
| Class: healthcare workers within 60 days after vaccination |                                                    |
|                                                            |                                                    |
| Rules_159                                                  | passed counts:1                                    |
| node_0: feature_name=HuIgG_0.10                            | feature_id[9].value > threshold=19120.166015625    |
| node_92: feature_name=a-HuIgG_0.03                         | feature_id[14].value <= threshold=19665.666015625  |
| node_93: feature_name=SARS.CoV.2.Spike.RBD.His.HEK         | feature_id[4].value > threshold=3.0166666507720947 |
| node_105: feature_name=SARS.CoV.2.S1.mFcTag                | feature_id[0].value <= threshold=54010.166015625   |
| node_106: feature_name=SARS.CoV.2.S1+S2                    | feature_id[7].value > threshold=48317.708984375    |
| node_228: feature_name=a-MoIgG_0.10                        | feature_id[16].value > threshold=1652.5            |
| node_230: feature_name=HuIgG_0.10                          | feature_id[9].value <= threshold=30107.666015625   |
| node_231: feature_name=HuIgG_0.03                          | feature_id[8].value <= threshold=5533.83349609375  |
| node_232: feature_name=SARS.CoV.2.Spike.RBD.His.HEK        | feature_id[4].value > threshold=11116.333374023438 |
| node_234: feature_name=SARS.CoV.2.S1+S2                    | feature_id[7].value <= threshold=48882.58203125    |
| node_235: feature_name=SARS.CoV.2.Spike.RBD.rFc            | feature_id[5].value <= threshold=45170.75          |
| node_236: feature_name=a-HuIgG_0.03                        | feature_id[14].value <= threshold=11110.0          |
| Class: healthcare workers within 60 days after vaccination |                                                    |
|                                                            |                                                    |
| Rules_160                                                  | passed counts:1                                    |
| node_0: feature_name=HuIgG_0.10                            | feature_id[9].value > threshold=19120.166015625    |

|                                                         |                                                     |
|---------------------------------------------------------|-----------------------------------------------------|
| node_92: feature_name=a-HuIgG_0.03                      | feature_id[14].value <= threshold=19665.666015625   |
| node_93: feature_name=SARS.CoV.2.Spike.RBD.His.HEK      | feature_id[4].value > threshold=3.0166666507720947  |
| node_105: feature_name=SARS.CoV.2.S1.mFcTag             | feature_id[0].value <= threshold=54010.166015625    |
| node_106: feature_name=SARS.CoV.2.S1+S2                 | feature_id[7].value > threshold=48317.708984375     |
| node_228: feature_name=a-MoIgG_0.10                     | feature_id[16].value > threshold=1652.5             |
| node_230: feature_name=HuIgG_0.10                       | feature_id[9].value <= threshold=30107.666015625    |
| node_231: feature_name=HuIgG_0.03                       | feature_id[8].value <= threshold=5533.83349609375   |
| node_232: feature_name=SARS.CoV.2.Spike.RBD.His.HEK     | feature_id[4].value <= threshold=11116.333374023438 |
| Class: unvaccinated healthcare workers                  |                                                     |
|                                                         |                                                     |
| Rules_161                                               | passed counts:1                                     |
| node_0: feature_name=HuIgG_0.10                         | feature_id[9].value > threshold=19120.166015625     |
| node_92: feature_name=a-HuIgG_0.03                      | feature_id[14].value <= threshold=19665.666015625   |
| node_93: feature_name=SARS.CoV.2.Spike.RBD.His.HEK      | feature_id[4].value > threshold=3.0166666507720947  |
| node_105: feature_name=SARS.CoV.2.S1.mFcTag             | feature_id[0].value <= threshold=54010.166015625    |
| node_106: feature_name=SARS.CoV.2.S1+S2                 | feature_id[7].value <= threshold=48317.708984375    |
| node_107: feature_name=a-HuIgG_0.03                     | feature_id[14].value > threshold=12099.83349609375  |
| node_155: feature_name=SARS.CoV.2.Spike.RBD.His.Bac     | feature_id[3].value > threshold=18979.9912109375    |
| node_167: feature_name=a-MoIgG_0.10                     | feature_id[16].value > threshold=4979.5             |
| node_201: feature_name=HuIgG_0.10                       | feature_id[9].value <= threshold=26006.0            |
| node_202: feature_name=HuIgG_0.03                       | feature_id[8].value > threshold=6080.0              |
| node_216: feature_name=SARS.CoV.2.Spike.RBD.rFc         | feature_id[5].value > threshold=43169.25            |
| node_220: feature_name=SARS.CoV.2.Spike.RBD.His.Bac     | feature_id[3].value <= threshold=34138.75           |
| node_221: feature_name=SARS.CoV.2.Spike.RBD.His.HEK     | feature_id[4].value > threshold=37141.416015625     |
| Class: healthcare workers 60–180 days after vaccination |                                                     |

|                                                            |                                                    |
|------------------------------------------------------------|----------------------------------------------------|
|                                                            |                                                    |
| Rules_162                                                  | passed counts:1                                    |
| node_0: feature_name=HuIgG_0.10                            | feature_id[9].value > threshold=19120.166015625    |
| node_92: feature_name=a-HuIgG_0.03                         | feature_id[14].value <= threshold=19665.666015625  |
| node_93: feature_name=SARS.CoV.2.Spike.RBD.His.HEK         | feature_id[4].value > threshold=3.0166666507720947 |
| node_105: feature_name=SARS.CoV.2.S1.mFcTag                | feature_id[0].value <= threshold=54010.166015625   |
| node_106: feature_name=SARS.CoV.2.S1+S2                    | feature_id[7].value <= threshold=48317.708984375   |
| node_107: feature_name=a-HuIgG_0.03                        | feature_id[14].value > threshold=12099.83349609375 |
| node_155: feature_name=SARS.CoV.2.Spike.RBD.His.Bac        | feature_id[3].value > threshold=18979.9912109375   |
| node_167: feature_name=a-MoIgG_0.10                        | feature_id[16].value > threshold=4979.5            |
| node_201: feature_name=HuIgG_0.10                          | feature_id[9].value <= threshold=26006.0           |
| node_202: feature_name=HuIgG_0.03                          | feature_id[8].value > threshold=6080.0             |
| node_216: feature_name=SARS.CoV.2.Spike.RBD.rFc            | feature_id[5].value <= threshold=43169.25          |
| node_217: feature_name=SARS.CoV.2.Spike.RBD.His.HEK        | feature_id[4].value <= threshold=12896.658203125   |
| Class: healthcare workers within 60 days after vaccination |                                                    |
|                                                            |                                                    |
| Rules_163                                                  | passed counts:1                                    |
| node_0: feature_name=HuIgG_0.10                            | feature_id[9].value > threshold=19120.166015625    |
| node_92: feature_name=a-HuIgG_0.03                         | feature_id[14].value <= threshold=19665.666015625  |
| node_93: feature_name=SARS.CoV.2.Spike.RBD.His.HEK         | feature_id[4].value > threshold=3.0166666507720947 |
| node_105: feature_name=SARS.CoV.2.S1.mFcTag                | feature_id[0].value <= threshold=54010.166015625   |
| node_106: feature_name=SARS.CoV.2.S1+S2                    | feature_id[7].value <= threshold=48317.708984375   |
| node_107: feature_name=a-HuIgG_0.03                        | feature_id[14].value > threshold=12099.83349609375 |
| node_155: feature_name=SARS.CoV.2.Spike.RBD.His.Bac        | feature_id[3].value > threshold=18979.9912109375   |
| node_167: feature_name=a-MoIgG_0.10                        | feature_id[16].value > threshold=4979.5            |

|                                                            |                                                    |
|------------------------------------------------------------|----------------------------------------------------|
| node_201: feature_name=HuIgG_0.10                          | feature_id[9].value <= threshold=26006.0           |
| node_202: feature_name=HuIgG_0.03                          | feature_id[8].value <= threshold=6080.0            |
| node_203: feature_name=SARS.CoV.2.S1.HisTag                | feature_id[2].value > threshold=38575.359375       |
| node_213: feature_name=SARS.CoV.2.Spike.RBD.His.HEK        | feature_id[4].value > threshold=39411.75           |
| Class: healthcare workers within 60 days after vaccination |                                                    |
| Rules_164                                                  | passed counts:1                                    |
| node_0: feature_name=HuIgG_0.10                            | feature_id[9].value > threshold=19120.166015625    |
| node_92: feature_name=a-HuIgG_0.03                         | feature_id[14].value <= threshold=19665.666015625  |
| node_93: feature_name=SARS.CoV.2.Spike.RBD.His.HEK         | feature_id[4].value > threshold=3.0166666507720947 |
| node_105: feature_name=SARS.CoV.2.S1.mFcTag                | feature_id[0].value <= threshold=54010.166015625   |
| node_106: feature_name=SARS.CoV.2.S1+S2                    | feature_id[7].value <= threshold=48317.708984375   |
| node_107: feature_name=a-HuIgG_0.03                        | feature_id[14].value > threshold=12099.83349609375 |
| node_155: feature_name=SARS.CoV.2.Spike.RBD.His.Bac        | feature_id[3].value > threshold=18979.9912109375   |
| node_167: feature_name=a-MoIgG_0.10                        | feature_id[16].value > threshold=4979.5            |
| node_201: feature_name=HuIgG_0.10                          | feature_id[9].value <= threshold=26006.0           |
| node_202: feature_name=HuIgG_0.03                          | feature_id[8].value <= threshold=6080.0            |
| node_203: feature_name=SARS.CoV.2.S1.HisTag                | feature_id[2].value <= threshold=38575.359375      |
| node_204: feature_name=SARS.CoV.2.Spike.RBD.His.HEK        | feature_id[4].value > threshold=21567.4501953125   |
| node_208: feature_name=HuIgG_0.03                          | feature_id[8].value <= threshold=4924.333251953125 |
| node_209: feature_name=SARS.CoV.2.Spike.RBD.His.Bac        | feature_id[3].value > threshold=31771.125          |
| Class: healthcare workers within 60 days after vaccination |                                                    |
| Rules_165                                                  | passed counts:1                                    |
| node_0: feature_name=HuIgG_0.10                            | feature_id[9].value > threshold=19120.166015625    |

|                                                            |                                                    |
|------------------------------------------------------------|----------------------------------------------------|
| node_92: feature_name=a-HuIgG_0.03                         | feature_id[14].value <= threshold=19665.666015625  |
| node_93: feature_name=SARS.CoV.2.Spike.RBD.His.HEK         | feature_id[4].value > threshold=3.0166666507720947 |
| node_105: feature_name=SARS.CoV.2.S1.mFcTag                | feature_id[0].value <= threshold=54010.166015625   |
| node_106: feature_name=SARS.CoV.2.S1+S2                    | feature_id[7].value <= threshold=48317.708984375   |
| node_107: feature_name=a-HuIgG_0.03                        | feature_id[14].value > threshold=12099.83349609375 |
| node_155: feature_name=SARS.CoV.2.Spike.RBD.His.Bac        | feature_id[3].value > threshold=18979.9912109375   |
| node_167: feature_name=a-MoIgG_0.10                        | feature_id[16].value > threshold=4979.5            |
| node_201: feature_name=HuIgG_0.10                          | feature_id[9].value <= threshold=26006.0           |
| node_202: feature_name=HuIgG_0.03                          | feature_id[8].value <= threshold=6080.0            |
| node_203: feature_name=SARS.CoV.2.S1.HisTag                | feature_id[2].value <= threshold=38575.359375      |
| node_204: feature_name=SARS.CoV.2.Spike.RBD.His.HEK        | feature_id[4].value <= threshold=21567.4501953125  |
| node_205: feature_name=HuIgG_0.10                          | feature_id[9].value <= threshold=23045.6669921875  |
| Class: healthcare workers within 60 days after vaccination |                                                    |
|                                                            |                                                    |
| Rules_166                                                  | passed counts:1                                    |
| node_0: feature_name=HuIgG_0.10                            | feature_id[9].value > threshold=19120.166015625    |
| node_92: feature_name=a-HuIgG_0.03                         | feature_id[14].value <= threshold=19665.666015625  |
| node_93: feature_name=SARS.CoV.2.Spike.RBD.His.HEK         | feature_id[4].value > threshold=3.0166666507720947 |
| node_105: feature_name=SARS.CoV.2.S1.mFcTag                | feature_id[0].value <= threshold=54010.166015625   |
| node_106: feature_name=SARS.CoV.2.S1+S2                    | feature_id[7].value <= threshold=48317.708984375   |
| node_107: feature_name=a-HuIgG_0.03                        | feature_id[14].value > threshold=12099.83349609375 |
| node_155: feature_name=SARS.CoV.2.Spike.RBD.His.Bac        | feature_id[3].value > threshold=18979.9912109375   |
| node_167: feature_name=a-MoIgG_0.10                        | feature_id[16].value <= threshold=4979.5           |
| node_168: feature_name=SARS.CoV.2.S1+S2                    | feature_id[7].value > threshold=36298.75           |
| node_172: feature_name=SARS.CoV.2.S1.RBD.mFc               | feature_id[1].value > threshold=40153.283203125    |

|                                                            |                                                     |
|------------------------------------------------------------|-----------------------------------------------------|
| node_182: feature_name=HuIgG_0.10                          | feature_id[9].value > threshold=21919.833984375     |
| node_186: feature_name=a-HuIgG_0.10                        | feature_id[13].value > threshold=28919.0            |
| node_192: feature_name=a-HuIgG_0.10                        | feature_id[13].value <= threshold=31482.6669921875  |
| node_193: feature_name=a-HuIgG_0.03                        | feature_id[14].value > threshold=12541.0            |
| node_195: feature_name=a-HuIgG_0.30                        | feature_id[11].value <= threshold=40626.0           |
| Class: healthcare workers within 60 days after vaccination |                                                     |
|                                                            |                                                     |
| Rules_167                                                  | passed counts:1                                     |
| node_0: feature_name=HuIgG_0.10                            | feature_id[9].value > threshold=19120.166015625     |
| node_92: feature_name=a-HuIgG_0.03                         | feature_id[14].value <= threshold=19665.666015625   |
| node_93: feature_name=SARS.CoV.2.Spike.RBD.His.HEK         | feature_id[4].value > threshold=3.0166666507720947  |
| node_105: feature_name=SARS.CoV.2.S1.mFcTag                | feature_id[0].value <= threshold=54010.166015625    |
| node_106: feature_name=SARS.CoV.2.S1+S2                    | feature_id[7].value <= threshold=48317.708984375    |
| node_107: feature_name=a-HuIgG_0.03                        | feature_id[14].value > threshold=12099.83349609375  |
| node_155: feature_name=SARS.CoV.2.Spike.RBD.His.Bac        | feature_id[3].value > threshold=18979.9912109375    |
| node_167: feature_name=a-MoIgG_0.10                        | feature_id[16].value <= threshold=4979.5            |
| node_168: feature_name=SARS.CoV.2.S1+S2                    | feature_id[7].value > threshold=36298.75            |
| node_172: feature_name=SARS.CoV.2.S1.RBD.mFc               | feature_id[1].value > threshold=40153.283203125     |
| node_182: feature_name=HuIgG_0.10                          | feature_id[9].value > threshold=21919.833984375     |
| node_186: feature_name=a-HuIgG_0.10                        | feature_id[13].value <= threshold=28919.0           |
| node_187: feature_name=SARS.CoV.S1.HisTag                  | feature_id[15].value > threshold=4488.5833740234375 |
| node_189: feature_name=a-HuIgG_0.10                        | feature_id[13].value <= threshold=26194.3330078125  |
| Class: healthcare workers 60–180 days after vaccination    |                                                     |
|                                                            |                                                     |
| Rules_168                                                  | passed counts:1                                     |

|                                                           |                                                    |
|-----------------------------------------------------------|----------------------------------------------------|
| node_0: feature_name=HuIgG_0.10                           | feature_id[9].value > threshold=19120.166015625    |
| node_92: feature_name=a-HuIgG_0.03                        | feature_id[14].value <= threshold=19665.666015625  |
| node_93: feature_name=SARS.CoV.2.Spike.RBD.His.HEK        | feature_id[4].value > threshold=3.0166666507720947 |
| node_105: feature_name=SARS.CoV.2.S1.mFcTag               | feature_id[0].value <= threshold=54010.166015625   |
| node_106: feature_name=SARS.CoV.2.S1+S2                   | feature_id[7].value <= threshold=48317.708984375   |
| node_107: feature_name=a-HuIgG_0.03                       | feature_id[14].value > threshold=12099.83349609375 |
| node_155: feature_name=SARS.CoV.2.Spike.RBD.His.Bac       | feature_id[3].value > threshold=18979.9912109375   |
| node_167: feature_name=a-MoIgG_0.10                       | feature_id[16].value <= threshold=4979.5           |
| node_168: feature_name=SARS.CoV.2.S1+S2                   | feature_id[7].value > threshold=36298.75           |
| node_172: feature_name=SARS.CoV.2.S1.RBD.mFc              | feature_id[1].value > threshold=40153.283203125    |
| node_182: feature_name=HuIgG_0.10                         | feature_id[9].value <= threshold=21919.833984375   |
| node_183: feature_name=a-HuIgG_0.30                       | feature_id[11].value > threshold=51690.5           |
| Class: healthcare workers over 180 days after vaccination |                                                    |
|                                                           |                                                    |
| Rules_169                                                 | passed counts:1                                    |
| node_0: feature_name=HuIgG_0.10                           | feature_id[9].value > threshold=19120.166015625    |
| node_92: feature_name=a-HuIgG_0.03                        | feature_id[14].value <= threshold=19665.666015625  |
| node_93: feature_name=SARS.CoV.2.Spike.RBD.His.HEK        | feature_id[4].value > threshold=3.0166666507720947 |
| node_105: feature_name=SARS.CoV.2.S1.mFcTag               | feature_id[0].value <= threshold=54010.166015625   |
| node_106: feature_name=SARS.CoV.2.S1+S2                   | feature_id[7].value <= threshold=48317.708984375   |
| node_107: feature_name=a-HuIgG_0.03                       | feature_id[14].value > threshold=12099.83349609375 |
| node_155: feature_name=SARS.CoV.2.Spike.RBD.His.Bac       | feature_id[3].value > threshold=18979.9912109375   |
| node_167: feature_name=a-MoIgG_0.10                       | feature_id[16].value <= threshold=4979.5           |
| node_168: feature_name=SARS.CoV.2.S1+S2                   | feature_id[7].value > threshold=36298.75           |
| node_172: feature_name=SARS.CoV.2.S1.RBD.mFc              | feature_id[1].value <= threshold=40153.283203125   |

|                                                            |                                                    |
|------------------------------------------------------------|----------------------------------------------------|
| node_173: feature_name=SARS.CoV.2.S1.HisTag                | feature_id[2].value > threshold=25186.375          |
| node_175: feature_name=a-HuIgG_0.10                        | feature_id[13].value > threshold=27831.166015625   |
| node_177: feature_name=SARS.CoV.2.S1                       | feature_id[6].value <= threshold=29819.333984375   |
| node_178: feature_name=SARS.CoV.2.S1.HisTag                | feature_id[2].value > threshold=28188.974609375    |
| Class: healthcare workers within 60 days after vaccination |                                                    |
| Rules_170                                                  | passed counts:1                                    |
| node_0: feature_name=HuIgG_0.10                            | feature_id[9].value > threshold=19120.166015625    |
| node_92: feature_name=a-HuIgG_0.03                         | feature_id[14].value <= threshold=19665.666015625  |
| node_93: feature_name=SARS.CoV.2.Spike.RBD.His.HEK         | feature_id[4].value > threshold=3.016666507720947  |
| node_105: feature_name=SARS.CoV.2.S1.mFcTag                | feature_id[0].value <= threshold=54010.166015625   |
| node_106: feature_name=SARS.CoV.2.S1+S2                    | feature_id[7].value <= threshold=48317.708984375   |
| node_107: feature_name=a-HuIgG_0.03                        | feature_id[14].value > threshold=12099.83349609375 |
| node_155: feature_name=SARS.CoV.2.Spike.RBD.His.Bac        | feature_id[3].value > threshold=18979.9912109375   |
| node_167: feature_name=a-MoIgG_0.10                        | feature_id[16].value <= threshold=4979.5           |
| node_168: feature_name=SARS.CoV.2.S1+S2                    | feature_id[7].value > threshold=36298.75           |
| node_172: feature_name=SARS.CoV.2.S1.RBD.mFc               | feature_id[1].value <= threshold=40153.283203125   |
| node_173: feature_name=SARS.CoV.2.S1.HisTag                | feature_id[2].value > threshold=25186.375          |
| node_175: feature_name=a-HuIgG_0.10                        | feature_id[13].value <= threshold=27831.166015625  |
| Class: healthcare workers within 60 days after vaccination |                                                    |
| Rules_171                                                  | passed counts:1                                    |
| node_0: feature_name=HuIgG_0.10                            | feature_id[9].value > threshold=19120.166015625    |
| node_92: feature_name=a-HuIgG_0.03                         | feature_id[14].value <= threshold=19665.666015625  |
| node_93: feature_name=SARS.CoV.2.Spike.RBD.His.HEK         | feature_id[4].value > threshold=3.016666507720947  |



|                                                            |                                                     |
|------------------------------------------------------------|-----------------------------------------------------|
| node_105: feature_name=SARS.CoV.2.S1.mFcTag                | feature_id[0].value <= threshold=54010.166015625    |
| node_106: feature_name=SARS.CoV.2.S1+S2                    | feature_id[7].value <= threshold=48317.708984375    |
| node_107: feature_name=a-HuIgG_0.03                        | feature_id[14].value > threshold=12099.83349609375  |
| node_155: feature_name=SARS.CoV.2.Spike.RBD.His.Bac        | feature_id[3].value > threshold=18979.9912109375    |
| node_167: feature_name=a-MoIgG_0.10                        | feature_id[16].value <= threshold=4979.5            |
| node_168: feature_name=SARS.CoV.2.S1+S2                    | feature_id[7].value > threshold=36298.75            |
| node_172: feature_name=SARS.CoV.2.S1.RBD.mFc               | feature_id[1].value <= threshold=40153.283203125    |
| node_173: feature_name=SARS.CoV.2.S1.HisTag                | feature_id[2].value <= threshold=25186.375          |
| Class: healthcare workers within 60 days after vaccination |                                                     |
|                                                            |                                                     |
| Rules_172                                                  | passed counts:1                                     |
| node_0: feature_name=HuIgG_0.10                            | feature_id[9].value > threshold=19120.166015625     |
| node_92: feature_name=a-HuIgG_0.03                         | feature_id[14].value <= threshold=19665.666015625   |
| node_93: feature_name=SARS.CoV.2.Spike.RBD.His.HEK         | feature_id[4].value > threshold=3.016666507720947   |
| node_105: feature_name=SARS.CoV.2.S1.mFcTag                | feature_id[0].value <= threshold=54010.166015625    |
| node_106: feature_name=SARS.CoV.2.S1+S2                    | feature_id[7].value <= threshold=48317.708984375    |
| node_107: feature_name=a-HuIgG_0.03                        | feature_id[14].value > threshold=12099.83349609375  |
| node_155: feature_name=SARS.CoV.2.Spike.RBD.His.Bac        | feature_id[3].value <= threshold=18979.9912109375   |
| node_156: feature_name=a-MoIgG_0.10                        | feature_id[16].value > threshold=1739.1666259765625 |
| node_160: feature_name=HuIgG_0.30                          | feature_id[12].value > threshold=34829.83203125     |
| node_162: feature_name=HuIgG_0.03                          | feature_id[8].value > threshold=6681.166748046875   |
| node_164: feature_name=HuIgG_0.30                          | feature_id[12].value > threshold=40459.166015625    |
| Class: unvaccinated healthcare workers                     |                                                     |
|                                                            |                                                     |
| Rules_173                                                  | passed counts:1                                     |

|                                                     |                                                      |
|-----------------------------------------------------|------------------------------------------------------|
| node_0: feature_name=HuIgG_0.10                     | feature_id[9].value > threshold=19120.166015625      |
| node_92: feature_name=a-HuIgG_0.03                  | feature_id[14].value <= threshold=19665.666015625    |
| node_93: feature_name=SARS.CoV.2.Spike.RBD.His.HEK  | feature_id[4].value > threshold=3.0166666507720947   |
| node_105: feature_name=SARS.CoV.2.S1.mFcTag         | feature_id[0].value <= threshold=54010.166015625     |
| node_106: feature_name=SARS.CoV.2.S1+S2             | feature_id[7].value <= threshold=48317.708984375     |
| node_107: feature_name=a-HuIgG_0.03                 | feature_id[14].value > threshold=12099.83349609375   |
| node_155: feature_name=SARS.CoV.2.Spike.RBD.His.Bac | feature_id[3].value <= threshold=18979.9912109375    |
| node_156: feature_name=a-MoIgG_0.10                 | feature_id[16].value > threshold=1739.1666259765625  |
| node_160: feature_name=HuIgG_0.30                   | feature_id[12].value <= threshold=34829.83203125     |
| Class: unvaccinated healthcare workers              |                                                      |
|                                                     |                                                      |
| Rules_174                                           | passed counts:1                                      |
| node_0: feature_name=HuIgG_0.10                     | feature_id[9].value > threshold=19120.166015625      |
| node_92: feature_name=a-HuIgG_0.03                  | feature_id[14].value <= threshold=19665.666015625    |
| node_93: feature_name=SARS.CoV.2.Spike.RBD.His.HEK  | feature_id[4].value > threshold=3.0166666507720947   |
| node_105: feature_name=SARS.CoV.2.S1.mFcTag         | feature_id[0].value <= threshold=54010.166015625     |
| node_106: feature_name=SARS.CoV.2.S1+S2             | feature_id[7].value <= threshold=48317.708984375     |
| node_107: feature_name=a-HuIgG_0.03                 | feature_id[14].value > threshold=12099.83349609375   |
| node_155: feature_name=SARS.CoV.2.Spike.RBD.His.Bac | feature_id[3].value <= threshold=18979.9912109375    |
| node_156: feature_name=a-MoIgG_0.10                 | feature_id[16].value <= threshold=1739.1666259765625 |
| node_157: feature_name=SARS.CoV.S1.RBD.HisTag       | feature_id[10].value <= threshold=1304.0555419921875 |
| Class: unvaccinated healthcare workers              |                                                      |
|                                                     |                                                      |
| Rules_175                                           | passed counts:1                                      |
| node_0: feature_name=HuIgG_0.10                     | feature_id[9].value > threshold=19120.166015625      |

|                                                            |                                                     |
|------------------------------------------------------------|-----------------------------------------------------|
| node_92: feature_name=a-HuIgG_0.03                         | feature_id[14].value <= threshold=19665.666015625   |
| node_93: feature_name=SARS.CoV.2.Spike.RBD.His.HEK         | feature_id[4].value > threshold=3.0166666507720947  |
| node_105: feature_name=SARS.CoV.2.S1.mFcTag                | feature_id[0].value <= threshold=54010.166015625    |
| node_106: feature_name=SARS.CoV.2.S1+S2                    | feature_id[7].value <= threshold=48317.708984375    |
| node_107: feature_name=a-HuIgG_0.03                        | feature_id[14].value <= threshold=12099.83349609375 |
| node_108: feature_name=SARS.CoV.2.Spike.RBD.His.Bac        | feature_id[3].value > threshold=23841.4169921875    |
| node_118: feature_name=SARS.CoV.2.Spike.RBD.rFc            | feature_id[5].value > threshold=34554.69140625      |
| node_120: feature_name=SARS.CoV.2.S1                       | feature_id[6].value > threshold=36508.716796875     |
| node_142: feature_name=HuIgG_0.30                          | feature_id[12].value > threshold=40622.83203125     |
| node_150: feature_name=SARS.CoV.S1.RBD.HisTag              | feature_id[10].value > threshold=9578.58349609375   |
| node_152: feature_name=SARS.CoV.2.Spike.RBD.His.Bac        | feature_id[3].value > threshold=30984.7919921875    |
| Class: healthcare workers within 60 days after vaccination |                                                     |
|                                                            |                                                     |
| Rules_176                                                  | passed counts:1                                     |
| node_0: feature_name=HuIgG_0.10                            | feature_id[9].value > threshold=19120.166015625     |
| node_92: feature_name=a-HuIgG_0.03                         | feature_id[14].value <= threshold=19665.666015625   |
| node_93: feature_name=SARS.CoV.2.Spike.RBD.His.HEK         | feature_id[4].value > threshold=3.0166666507720947  |
| node_105: feature_name=SARS.CoV.2.S1.mFcTag                | feature_id[0].value <= threshold=54010.166015625    |
| node_106: feature_name=SARS.CoV.2.S1+S2                    | feature_id[7].value <= threshold=48317.708984375    |
| node_107: feature_name=a-HuIgG_0.03                        | feature_id[14].value <= threshold=12099.83349609375 |
| node_108: feature_name=SARS.CoV.2.Spike.RBD.His.Bac        | feature_id[3].value > threshold=23841.4169921875    |
| node_118: feature_name=SARS.CoV.2.Spike.RBD.rFc            | feature_id[5].value > threshold=34554.69140625      |
| node_120: feature_name=SARS.CoV.2.S1                       | feature_id[6].value > threshold=36508.716796875     |
| node_142: feature_name=HuIgG_0.30                          | feature_id[12].value <= threshold=40622.83203125    |
| node_143: feature_name=HuIgG_0.10                          | feature_id[9].value <= threshold=21439.1669921875   |

|                                                            |                                                     |
|------------------------------------------------------------|-----------------------------------------------------|
| node_144: feature_name=SARS.CoV.2.S1.mFcTag                | feature_id[0].value > threshold=51094.66796875      |
| node_146: feature_name=a-HuIgG_0.03                        | feature_id[14].value <= threshold=9792.33349609375  |
| Class: healthcare workers within 60 days after vaccination |                                                     |
|                                                            |                                                     |
| Rules_177                                                  | passed counts:1                                     |
| node_0: feature_name=HuIgG_0.10                            | feature_id[9].value > threshold=19120.166015625     |
| node_92: feature_name=a-HuIgG_0.03                         | feature_id[14].value <= threshold=19665.666015625   |
| node_93: feature_name=SARS.CoV.2.Spike.RBD.His.HEK         | feature_id[4].value > threshold=3.0166666507720947  |
| node_105: feature_name=SARS.CoV.2.S1.mFcTag                | feature_id[0].value <= threshold=54010.166015625    |
| node_106: feature_name=SARS.CoV.2.S1+S2                    | feature_id[7].value <= threshold=48317.708984375    |
| node_107: feature_name=a-HuIgG_0.03                        | feature_id[14].value <= threshold=12099.83349609375 |
| node_108: feature_name=SARS.CoV.2.Spike.RBD.His.Bac        | feature_id[3].value > threshold=23841.4169921875    |
| node_118: feature_name=SARS.CoV.2.Spike.RBD.rFc            | feature_id[5].value > threshold=34554.69140625      |
| node_120: feature_name=SARS.CoV.2.S1                       | feature_id[6].value <= threshold=36508.716796875    |
| node_121: feature_name=HuIgG_0.10                          | feature_id[9].value > threshold=24763.3330078125    |
| node_139: feature_name=SARS.CoV.2.Spike.RBD.His.Bac        | feature_id[3].value > threshold=33242.83203125      |
| Class: healthcare workers 60–180 days after vaccination    |                                                     |
|                                                            |                                                     |
| Rules_178                                                  | passed counts:1                                     |
| node_0: feature_name=HuIgG_0.10                            | feature_id[9].value > threshold=19120.166015625     |
| node_92: feature_name=a-HuIgG_0.03                         | feature_id[14].value <= threshold=19665.666015625   |
| node_93: feature_name=SARS.CoV.2.Spike.RBD.His.HEK         | feature_id[4].value > threshold=3.0166666507720947  |
| node_105: feature_name=SARS.CoV.2.S1.mFcTag                | feature_id[0].value <= threshold=54010.166015625    |
| node_106: feature_name=SARS.CoV.2.S1+S2                    | feature_id[7].value <= threshold=48317.708984375    |
| node_107: feature_name=a-HuIgG_0.03                        | feature_id[14].value <= threshold=12099.83349609375 |

|                                                         |                                                     |
|---------------------------------------------------------|-----------------------------------------------------|
| node_108: feature_name=SARS.CoV.2.Spike.RBD.His.Bac     | feature_id[3].value > threshold=23841.4169921875    |
| node_118: feature_name=SARS.CoV.2.Spike.RBD.rFc         | feature_id[5].value > threshold=34554.69140625      |
| node_120: feature_name=SARS.CoV.2.S1                    | feature_id[6].value <= threshold=36508.716796875    |
| node_121: feature_name=HuIgG_0.10                       | feature_id[9].value <= threshold=24763.3330078125   |
| node_122: feature_name=SARS.CoV.2.Spike.RBD.rFc         | feature_id[5].value <= threshold=42966.541015625    |
| node_123: feature_name=SARS.CoV.2.S1+S2                 | feature_id[7].value > threshold=43434.54296875      |
| node_135: feature_name=HuIgG_0.10                       | feature_id[9].value > threshold=24375.1669921875    |
| Class: healthcare workers 60–180 days after vaccination |                                                     |
|                                                         |                                                     |
| Rules_179                                               | passed counts:1                                     |
| node_0: feature_name=HuIgG_0.10                         | feature_id[9].value > threshold=19120.166015625     |
| node_92: feature_name=a-HuIgG_0.03                      | feature_id[14].value <= threshold=19665.666015625   |
| node_93: feature_name=SARS.CoV.2.Spike.RBD.His.HEK      | feature_id[4].value > threshold=3.016666507720947   |
| node_105: feature_name=SARS.CoV.2.S1.mFcTag             | feature_id[0].value <= threshold=54010.166015625    |
| node_106: feature_name=SARS.CoV.2.S1+S2                 | feature_id[7].value <= threshold=48317.708984375    |
| node_107: feature_name=a-HuIgG_0.03                     | feature_id[14].value <= threshold=12099.83349609375 |
| node_108: feature_name=SARS.CoV.2.Spike.RBD.His.Bac     | feature_id[3].value > threshold=23841.4169921875    |
| node_118: feature_name=SARS.CoV.2.Spike.RBD.rFc         | feature_id[5].value > threshold=34554.69140625      |
| node_120: feature_name=SARS.CoV.2.S1                    | feature_id[6].value <= threshold=36508.716796875    |
| node_121: feature_name=HuIgG_0.10                       | feature_id[9].value <= threshold=24763.3330078125   |
| node_122: feature_name=SARS.CoV.2.Spike.RBD.rFc         | feature_id[5].value <= threshold=42966.541015625    |
| node_123: feature_name=SARS.CoV.2.S1+S2                 | feature_id[7].value <= threshold=43434.54296875     |
| node_124: feature_name=SARS.CoV.2.S1+S2                 | feature_id[7].value <= threshold=42800.94140625     |
| node_125: feature_name=SARS.CoV.2.S1.mFcTag             | feature_id[0].value > threshold=47427.1328125       |
| node_129: feature_name=a-MoIgG_0.10                     | feature_id[16].value > threshold=5634.0             |

|                                                            |                                                     |
|------------------------------------------------------------|-----------------------------------------------------|
| node_131: feature_name=SARS.CoV.2.S1.RBD.mFc               | feature_id[1].value <= threshold=39372.166015625    |
| Class: healthcare workers over 180 days after vaccination  |                                                     |
|                                                            |                                                     |
| Rules_180                                                  | passed counts:1                                     |
| node_0: feature_name=HuIgG_0.10                            | feature_id[9].value > threshold=19120.166015625     |
| node_92: feature_name=a-HuIgG_0.03                         | feature_id[14].value <= threshold=19665.666015625   |
| node_93: feature_name=SARS.CoV.2.Spike.RBD.His.HEK         | feature_id[4].value > threshold=3.0166666507720947  |
| node_105: feature_name=SARS.CoV.2.S1.mFcTag                | feature_id[0].value <= threshold=54010.166015625    |
| node_106: feature_name=SARS.CoV.2.S1+S2                    | feature_id[7].value <= threshold=48317.708984375    |
| node_107: feature_name=a-HuIgG_0.03                        | feature_id[14].value <= threshold=12099.83349609375 |
| node_108: feature_name=SARS.CoV.2.Spike.RBD.His.Bac        | feature_id[3].value > threshold=23841.4169921875    |
| node_118: feature_name=SARS.CoV.2.Spike.RBD.rFc            | feature_id[5].value > threshold=34554.69140625      |
| node_120: feature_name=SARS.CoV.2.S1                       | feature_id[6].value <= threshold=36508.716796875    |
| node_121: feature_name=HuIgG_0.10                          | feature_id[9].value <= threshold=24763.3330078125   |
| node_122: feature_name=SARS.CoV.2.Spike.RBD.rFc            | feature_id[5].value <= threshold=42966.541015625    |
| node_123: feature_name=SARS.CoV.2.S1+S2                    | feature_id[7].value <= threshold=43434.54296875     |
| node_124: feature_name=SARS.CoV.2.S1+S2                    | feature_id[7].value <= threshold=42800.94140625     |
| node_125: feature_name=SARS.CoV.2.S1.mFcTag                | feature_id[0].value <= threshold=47427.1328125      |
| node_126: feature_name=SARS.CoV.2.Spike.RBD.rFc            | feature_id[5].value > threshold=37955.708984375     |
| Class: healthcare workers within 60 days after vaccination |                                                     |
|                                                            |                                                     |
| Rules_181                                                  | passed counts:1                                     |
| node_0: feature_name=HuIgG_0.10                            | feature_id[9].value > threshold=19120.166015625     |
| node_92: feature_name=a-HuIgG_0.03                         | feature_id[14].value <= threshold=19665.666015625   |
| node_93: feature_name=SARS.CoV.2.Spike.RBD.His.HEK         | feature_id[4].value > threshold=3.0166666507720947  |

|                                                         |                                                     |
|---------------------------------------------------------|-----------------------------------------------------|
| node_105: feature_name=SARS.CoV.2.S1.mFcTag             | feature_id[0].value <= threshold=54010.166015625    |
| node_106: feature_name=SARS.CoV.2.S1+S2                 | feature_id[7].value <= threshold=48317.708984375    |
| node_107: feature_name=a-HuIgG_0.03                     | feature_id[14].value <= threshold=12099.83349609375 |
| node_108: feature_name=SARS.CoV.2.Spike.RBD.His.Bac     | feature_id[3].value <= threshold=23841.4169921875   |
| node_109: feature_name=SARS.CoV.2.S1+S2                 | feature_id[7].value <= threshold=36783.25           |
| node_110: feature_name=SARS.CoV.2.S1                    | feature_id[6].value <= threshold=26291.7998046875   |
| node_111: feature_name=HuIgG_0.10                       | feature_id[9].value > threshold=20106.3330078125    |
| node_113: feature_name=HuIgG_0.03                       | feature_id[8].value > threshold=5848.666748046875   |
| Class: healthcare workers 60–180 days after vaccination |                                                     |
|                                                         |                                                     |
| Rules_182                                               | passed counts:1                                     |
| node_0: feature_name=HuIgG_0.10                         | feature_id[9].value > threshold=19120.166015625     |
| node_92: feature_name=a-HuIgG_0.03                      | feature_id[14].value <= threshold=19665.666015625   |
| node_93: feature_name=SARS.CoV.2.Spike.RBD.His.HEK      | feature_id[4].value > threshold=3.0166666507720947  |
| node_105: feature_name=SARS.CoV.2.S1.mFcTag             | feature_id[0].value <= threshold=54010.166015625    |
| node_106: feature_name=SARS.CoV.2.S1+S2                 | feature_id[7].value <= threshold=48317.708984375    |
| node_107: feature_name=a-HuIgG_0.03                     | feature_id[14].value <= threshold=12099.83349609375 |
| node_108: feature_name=SARS.CoV.2.Spike.RBD.His.Bac     | feature_id[3].value <= threshold=23841.4169921875   |
| node_109: feature_name=SARS.CoV.2.S1+S2                 | feature_id[7].value <= threshold=36783.25           |
| node_110: feature_name=SARS.CoV.2.S1                    | feature_id[6].value <= threshold=26291.7998046875   |
| node_111: feature_name=HuIgG_0.10                       | feature_id[9].value <= threshold=20106.3330078125   |
| Class: healthcare workers 60–180 days after vaccination |                                                     |
|                                                         |                                                     |
| Rules_183                                               | passed counts:1                                     |
| node_0: feature_name=HuIgG_0.10                         | feature_id[9].value > threshold=19120.166015625     |

|                                                            |                                                     |
|------------------------------------------------------------|-----------------------------------------------------|
| node_92: feature_name=a-HuIgG_0.03                         | feature_id[14].value <= threshold=19665.666015625   |
| node_93: feature_name=SARS.CoV.2.Spike.RBD.His.HEK         | feature_id[4].value <= threshold=3.0166666507720947 |
| node_94: feature_name=SARS.CoV.2.Spike.RBD.His.Bac         | feature_id[3].value > threshold=-51.85277557373047  |
| node_100: feature_name=SARS.CoV.2.S1.mFcTag                | feature_id[0].value > threshold=488.56666564941406  |
| Class: healthcare workers within 60 days after vaccination |                                                     |
| Rules_184                                                  | passed counts:1                                     |
| node_0: feature_name=HuIgG_0.10                            | feature_id[9].value > threshold=19120.166015625     |
| node_92: feature_name=a-HuIgG_0.03                         | feature_id[14].value <= threshold=19665.666015625   |
| node_93: feature_name=SARS.CoV.2.Spike.RBD.His.HEK         | feature_id[4].value <= threshold=3.0166666507720947 |
| node_94: feature_name=SARS.CoV.2.Spike.RBD.His.Bac         | feature_id[3].value > threshold=-51.85277557373047  |
| node_100: feature_name=SARS.CoV.2.S1.mFcTag                | feature_id[0].value <= threshold=488.56666564941406 |
| node_101: feature_name=a-HuIgG_0.30                        | feature_id[11].value <= threshold=34723.5           |
| Class: healthcare workers within 60 days after vaccination |                                                     |
| Rules_185                                                  | passed counts:1                                     |
| node_0: feature_name=HuIgG_0.10                            | feature_id[9].value > threshold=19120.166015625     |
| node_92: feature_name=a-HuIgG_0.03                         | feature_id[14].value <= threshold=19665.666015625   |
| node_93: feature_name=SARS.CoV.2.Spike.RBD.His.HEK         | feature_id[4].value <= threshold=3.0166666507720947 |
| node_94: feature_name=SARS.CoV.2.Spike.RBD.His.Bac         | feature_id[3].value <= threshold=-51.85277557373047 |
| node_95: feature_name=SARS.CoV.2.S1.RBD.mFc                | feature_id[1].value > threshold=-141.8333387374878  |
| node_97: feature_name=a-HuIgG_0.30                         | feature_id[11].value > threshold=1290.8333435058594 |
| Class: healthcare workers 60–180 days after vaccination    |                                                     |
| Rules_186                                                  | passed counts:1                                     |



|                                                           |                                                      |
|-----------------------------------------------------------|------------------------------------------------------|
| node_0: feature_name=HuIgG_0.10                           | feature_id[9].value > threshold=19120.166015625      |
| node_92: feature_name=a-HuIgG_0.03                        | feature_id[14].value <= threshold=19665.666015625    |
| node_93: feature_name=SARS.CoV.2.Spike.RBD.His.HEK        | feature_id[4].value <= threshold=3.0166666507720947  |
| node_94: feature_name=SARS.CoV.2.Spike.RBD.His.Bac        | feature_id[3].value <= threshold=-51.85277557373047  |
| node_95: feature_name=SARS.CoV.2.S1.RBD.mFc               | feature_id[1].value > threshold=-141.8333387374878   |
| node_97: feature_name=a-HuIgG_0.30                        | feature_id[11].value <= threshold=1290.8333435058594 |
| Class: healthcare workers over 180 days after vaccination |                                                      |
|                                                           |                                                      |
| Rules_187                                                 | passed counts:1                                      |
| node_0: feature_name=HuIgG_0.10                           | feature_id[9].value <= threshold=19120.166015625     |
| node_1: feature_name=SARS.CoV.2.S1.RBD.mFc                | feature_id[1].value > threshold=3773.8334350585938   |
| node_9: feature_name=a-HuIgG_0.30                         | feature_id[11].value > threshold=33726.833984375     |
| node_47: feature_name=SARS.CoV.2.S1.mFcTag                | feature_id[0].value > threshold=43185.68359375       |
| node_57: feature_name=a-HuIgG_0.03                        | feature_id[14].value > threshold=10858.0             |
| node_71: feature_name=HuIgG_0.03                          | feature_id[8].value > threshold=3796.0               |
| node_83: feature_name=SARS.CoV.2.S1+S2                    | feature_id[7].value > threshold=49967.91796875       |
| node_87: feature_name=HuIgG_0.10                          | feature_id[9].value > threshold=18981.666015625      |
| node_89: feature_name=HuIgG_0.30                          | feature_id[12].value > threshold=38480.5             |
| Class: healthcare workers over 180 days after vaccination |                                                      |
|                                                           |                                                      |
| Rules_188                                                 | passed counts:1                                      |
| node_0: feature_name=HuIgG_0.10                           | feature_id[9].value <= threshold=19120.166015625     |
| node_1: feature_name=SARS.CoV.2.S1.RBD.mFc                | feature_id[1].value > threshold=3773.8334350585938   |
| node_9: feature_name=a-HuIgG_0.30                         | feature_id[11].value > threshold=33726.833984375     |
| node_47: feature_name=SARS.CoV.2.S1.mFcTag                | feature_id[0].value > threshold=43185.68359375       |

|                                                            |                                                    |
|------------------------------------------------------------|----------------------------------------------------|
| node_57: feature_name=a-HuIgG_0.03                         | feature_id[14].value > threshold=10858.0           |
| node_71: feature_name=HuIgG_0.03                           | feature_id[8].value > threshold=3796.0             |
| node_83: feature_name=SARS.CoV.2.S1+S2                     | feature_id[7].value > threshold=49967.91796875     |
| node_87: feature_name=HuIgG_0.10                           | feature_id[9].value > threshold=18981.666015625    |
| node_89: feature_name=HuIgG_0.30                           | feature_id[12].value <= threshold=38480.5          |
| Class: healthcare workers 60–180 days after vaccination    |                                                    |
|                                                            |                                                    |
| Rules_189                                                  | passed counts:1                                    |
| node_0: feature_name=HuIgG_0.10                            | feature_id[9].value <= threshold=19120.166015625   |
| node_1: feature_name=SARS.CoV.2.S1.RBD.mFc                 | feature_id[1].value > threshold=3773.8334350585938 |
| node_9: feature_name=a-HuIgG_0.30                          | feature_id[11].value > threshold=33726.833984375   |
| node_47: feature_name=SARS.CoV.2.S1.mFcTag                 | feature_id[0].value > threshold=43185.68359375     |
| node_57: feature_name=a-HuIgG_0.03                         | feature_id[14].value > threshold=10858.0           |
| node_71: feature_name=HuIgG_0.03                           | feature_id[8].value > threshold=3796.0             |
| node_83: feature_name=SARS.CoV.2.S1+S2                     | feature_id[7].value <= threshold=49967.91796875    |
| node_84: feature_name=HuIgG_0.10                           | feature_id[9].value <= threshold=17143.833984375   |
| Class: healthcare workers within 60 days after vaccination |                                                    |
|                                                            |                                                    |
| Rules_190                                                  | passed counts:1                                    |
| node_0: feature_name=HuIgG_0.10                            | feature_id[9].value <= threshold=19120.166015625   |
| node_1: feature_name=SARS.CoV.2.S1.RBD.mFc                 | feature_id[1].value > threshold=3773.8334350585938 |
| node_9: feature_name=a-HuIgG_0.30                          | feature_id[11].value > threshold=33726.833984375   |
| node_47: feature_name=SARS.CoV.2.S1.mFcTag                 | feature_id[0].value > threshold=43185.68359375     |
| node_57: feature_name=a-HuIgG_0.03                         | feature_id[14].value <= threshold=10858.0          |
| node_58: feature_name=HuIgG_0.30                           | feature_id[12].value <= threshold=36767.33203125   |

|                                                            |                                                    |
|------------------------------------------------------------|----------------------------------------------------|
| node_59: feature_name=a-HuIgG_0.10                         | feature_id[13].value > threshold=21868.0           |
| node_61: feature_name=a-HuIgG_0.03                         | feature_id[14].value > threshold=10179.0           |
| node_65: feature_name=SARS.CoV.2.S1                        | feature_id[6].value > threshold=34029.666015625    |
| node_67: feature_name=HuIgG_0.10                           | feature_id[9].value > threshold=18956.5            |
| Class: healthcare workers within 60 days after vaccination |                                                    |
|                                                            |                                                    |
| Rules_191                                                  | passed counts:1                                    |
| node_0: feature_name=HuIgG_0.10                            | feature_id[9].value <= threshold=19120.166015625   |
| node_1: feature_name=SARS.CoV.2.S1.RBD.mFc                 | feature_id[1].value > threshold=3773.8334350585938 |
| node_9: feature_name=a-HuIgG_0.30                          | feature_id[11].value > threshold=33726.833984375   |
| node_47: feature_name=SARS.CoV.2.S1.mFcTag                 | feature_id[0].value > threshold=43185.68359375     |
| node_57: feature_name=a-HuIgG_0.03                         | feature_id[14].value <= threshold=10858.0          |
| node_58: feature_name=HuIgG_0.30                           | feature_id[12].value <= threshold=36767.33203125   |
| node_59: feature_name=a-HuIgG_0.10                         | feature_id[13].value > threshold=21868.0           |
| node_61: feature_name=a-HuIgG_0.03                         | feature_id[14].value <= threshold=10179.0          |
| node_62: feature_name=a-HuIgG_0.30                         | feature_id[11].value <= threshold=34348.833984375  |
| Class: healthcare workers 60–180 days after vaccination    |                                                    |
|                                                            |                                                    |
| Rules_192                                                  | passed counts:1                                    |
| node_0: feature_name=HuIgG_0.10                            | feature_id[9].value <= threshold=19120.166015625   |
| node_1: feature_name=SARS.CoV.2.S1.RBD.mFc                 | feature_id[1].value > threshold=3773.8334350585938 |
| node_9: feature_name=a-HuIgG_0.30                          | feature_id[11].value > threshold=33726.833984375   |
| node_47: feature_name=SARS.CoV.2.S1.mFcTag                 | feature_id[0].value <= threshold=43185.68359375    |
| node_48: feature_name=SARS.CoV.S1.RBD.HisTag               | feature_id[10].value > threshold=3416.129638671875 |
| node_52: feature_name=SARS.CoV.2.S1.HisTag                 | feature_id[2].value <= threshold=7094.0            |

|                                                         |                                                     |
|---------------------------------------------------------|-----------------------------------------------------|
| node_53: feature_name=a-HuIgG_0.30                      | feature_id[11].value > threshold=42229.833984375    |
| Class: healthcare workers 60–180 days after vaccination |                                                     |
| Rules_193                                               | passed counts:1                                     |
| node_0: feature_name=HuIgG_0.10                         | feature_id[9].value <= threshold=19120.166015625    |
| node_1: feature_name=SARS.CoV.2.S1.RBD.mFc              | feature_id[1].value > threshold=3773.8334350585938  |
| node_9: feature_name=a-HuIgG_0.30                       | feature_id[11].value > threshold=33726.833984375    |
| node_47: feature_name=SARS.CoV.2.S1.mFcTag              | feature_id[0].value <= threshold=43185.68359375     |
| node_48: feature_name=SARS.CoV.S1.RBD.HisTag            | feature_id[10].value <= threshold=3416.129638671875 |
| node_49: feature_name=SARS.CoV.2.S1.HisTag              | feature_id[2].value <= threshold=4582.9832763671875 |
| Class: healthcare workers 60–180 days after vaccination |                                                     |
| Rules_194                                               | passed counts:1                                     |
| node_0: feature_name=HuIgG_0.10                         | feature_id[9].value <= threshold=19120.166015625    |
| node_1: feature_name=SARS.CoV.2.S1.RBD.mFc              | feature_id[1].value > threshold=3773.8334350585938  |
| node_9: feature_name=a-HuIgG_0.30                       | feature_id[11].value <= threshold=33726.833984375   |
| node_10: feature_name=HuIgG_0.03                        | feature_id[8].value > threshold=1023.1666564941406  |
| node_20: feature_name=SARS.CoV.S1.HisTag                | feature_id[15].value > threshold=400.3000030517578  |
| node_24: feature_name=SARS.CoV.2.Spike.RBD.His.Bac      | feature_id[3].value <= threshold=36933.69921875     |
| node_25: feature_name=SARS.CoV.2.S1.RBD.mFc             | feature_id[1].value <= threshold=40856.734375       |
| node_26: feature_name=SARS.CoV.S1.HisTag                | feature_id[15].value > threshold=15087.41650390625  |
| node_34: feature_name=SARS.CoV.S1.HisTag                | feature_id[15].value > threshold=15476.41650390625  |
| node_36: feature_name=a-MoIgG_0.10                      | feature_id[16].value > threshold=4103.6666259765625 |
| node_38: feature_name=SARS.CoV.2.Spike.RBD.His.HEK      | feature_id[4].value > threshold=22606.25048828125   |
| Class: healthcare workers 60–180 days after vaccination |                                                     |

|                                                            |                                                     |
|------------------------------------------------------------|-----------------------------------------------------|
|                                                            |                                                     |
| Rules_195                                                  | passed counts:1                                     |
| node_0: feature_name=HuIgG_0.10                            | feature_id[9].value <= threshold=19120.166015625    |
| node_1: feature_name=SARS.CoV.2.S1.RBD.mFc                 | feature_id[1].value > threshold=3773.8334350585938  |
| node_9: feature_name=a-HuIgG_0.30                          | feature_id[11].value <= threshold=33726.833984375   |
| node_10: feature_name=HuIgG_0.03                           | feature_id[8].value > threshold=1023.1666564941406  |
| node_20: feature_name=SARS.CoV.S1.HisTag                   | feature_id[15].value > threshold=400.3000030517578  |
| node_24: feature_name=SARS.CoV.2.Spike.RBD.His.Bac         | feature_id[3].value <= threshold=36933.69921875     |
| node_25: feature_name=SARS.CoV.2.S1.RBD.mFc                | feature_id[1].value <= threshold=40856.734375       |
| node_26: feature_name=SARS.CoV.S1.HisTag                   | feature_id[15].value > threshold=15087.41650390625  |
| node_34: feature_name=SARS.CoV.S1.HisTag                   | feature_id[15].value > threshold=15476.41650390625  |
| node_36: feature_name=a-MoIgG_0.10                         | feature_id[16].value > threshold=4103.6666259765625 |
| node_38: feature_name=SARS.CoV.2.Spike.RBD.His.HEK         | feature_id[4].value <= threshold=22606.25048828125  |
| Class: healthcare workers within 60 days after vaccination |                                                     |
|                                                            |                                                     |
| Rules_196                                                  | passed counts:1                                     |
| node_0: feature_name=HuIgG_0.10                            | feature_id[9].value <= threshold=19120.166015625    |
| node_1: feature_name=SARS.CoV.2.S1.RBD.mFc                 | feature_id[1].value > threshold=3773.8334350585938  |
| node_9: feature_name=a-HuIgG_0.30                          | feature_id[11].value <= threshold=33726.833984375   |
| node_10: feature_name=HuIgG_0.03                           | feature_id[8].value > threshold=1023.1666564941406  |
| node_20: feature_name=SARS.CoV.S1.HisTag                   | feature_id[15].value > threshold=400.3000030517578  |
| node_24: feature_name=SARS.CoV.2.Spike.RBD.His.Bac         | feature_id[3].value <= threshold=36933.69921875     |
| node_25: feature_name=SARS.CoV.2.S1.RBD.mFc                | feature_id[1].value <= threshold=40856.734375       |
| node_26: feature_name=SARS.CoV.S1.HisTag                   | feature_id[15].value > threshold=15087.41650390625  |
| node_34: feature_name=SARS.CoV.S1.HisTag                   | feature_id[15].value <= threshold=15476.41650390625 |

|                                                            |                                                     |
|------------------------------------------------------------|-----------------------------------------------------|
| Class: healthcare workers within 60 days after vaccination |                                                     |
|                                                            |                                                     |
| Rules_197                                                  | passed counts:1                                     |
| node_0: feature_name=HuIgG_0.10                            | feature_id[9].value <= threshold=19120.166015625    |
| node_1: feature_name=SARS.CoV.2.S1.RBD.mFc                 | feature_id[1].value > threshold=3773.8334350585938  |
| node_9: feature_name=a-HuIgG_0.30                          | feature_id[11].value <= threshold=33726.833984375   |
| node_10: feature_name=HuIgG_0.03                           | feature_id[8].value > threshold=1023.1666564941406  |
| node_20: feature_name=SARS.CoV.S1.HisTag                   | feature_id[15].value > threshold=400.3000030517578  |
| node_24: feature_name=SARS.CoV.2.Spike.RBD.His.Bac         | feature_id[3].value <= threshold=36933.69921875     |
| node_25: feature_name=SARS.CoV.2.S1.RBD.mFc                | feature_id[1].value <= threshold=40856.734375       |
| node_26: feature_name=SARS.CoV.S1.HisTag                   | feature_id[15].value <= threshold=15087.41650390625 |
| node_27: feature_name=SARS.CoV.2.Spike.RBD.His.HEK         | feature_id[4].value <= threshold=10178.375          |
| node_28: feature_name=SARS.CoV.2.S1.RBD.mFc                | feature_id[1].value <= threshold=33458.650390625    |
| node_29: feature_name=SARS.CoV.2.Spike.RBD.His.HEK         | feature_id[4].value > threshold=10129.44140625      |
| Class: healthcare workers over 180 days after vaccination  |                                                     |
|                                                            |                                                     |
| Rules_198                                                  | passed counts:1                                     |
| node_0: feature_name=HuIgG_0.10                            | feature_id[9].value <= threshold=19120.166015625    |
| node_1: feature_name=SARS.CoV.2.S1.RBD.mFc                 | feature_id[1].value > threshold=3773.8334350585938  |
| node_9: feature_name=a-HuIgG_0.30                          | feature_id[11].value <= threshold=33726.833984375   |
| node_10: feature_name=HuIgG_0.03                           | feature_id[8].value > threshold=1023.1666564941406  |
| node_20: feature_name=SARS.CoV.S1.HisTag                   | feature_id[15].value <= threshold=400.3000030517578 |
| node_21: feature_name=SARS.CoV.2.Spike.RBD.His.HEK         | feature_id[4].value <= threshold=2291.9304809570312 |
| Class: healthcare workers 60–180 days after vaccination    |                                                     |
|                                                            |                                                     |

|                                                            |                                                      |
|------------------------------------------------------------|------------------------------------------------------|
| Rules_199                                                  | passed counts:1                                      |
| node_0: feature_name=HuIgG_0.10                            | feature_id[9].value <= threshold=19120.166015625     |
| node_1: feature_name=SARS.CoV.2.S1.RBD.mFc                 | feature_id[1].value > threshold=3773.8334350585938   |
| node_9: feature_name=a-HuIgG_0.30                          | feature_id[11].value <= threshold=33726.833984375    |
| node_10: feature_name=HuIgG_0.03                           | feature_id[8].value <= threshold=1023.1666564941406  |
| node_11: feature_name=SARS.CoV.2.S1.mFcTag                 | feature_id[0].value <= threshold=34194.916015625     |
| node_12: feature_name=SARS.CoV.2.S1+S2                     | feature_id[7].value > threshold=26709.75             |
| node_14: feature_name=SARS.CoV.2.Spike.RBD.His.HEK         | feature_id[4].value <= threshold=8029.208251953125   |
| Class: healthcare workers 60–180 days after vaccination    |                                                      |
| Rules_200                                                  | passed counts:1                                      |
| node_0: feature_name=HuIgG_0.10                            | feature_id[9].value <= threshold=19120.166015625     |
| node_1: feature_name=SARS.CoV.2.S1.RBD.mFc                 | feature_id[1].value <= threshold=3773.8334350585938  |
| node_2: feature_name=SARS.CoV.2.S1.HisTag                  | feature_id[2].value > threshold=-383.86944580078125  |
| node_4: feature_name=SARS.CoV.2.S1                         | feature_id[6].value <= threshold=435.629638671875    |
| node_5: feature_name=SARS.CoV.2.S1                         | feature_id[6].value > threshold=410.7962951660156    |
| Class: healthcare workers within 60 days after vaccination |                                                      |
| Rules_201                                                  | passed counts:1                                      |
| node_0: feature_name=HuIgG_0.10                            | feature_id[9].value <= threshold=19120.166015625     |
| node_1: feature_name=SARS.CoV.2.S1.RBD.mFc                 | feature_id[1].value <= threshold=3773.8334350585938  |
| node_2: feature_name=SARS.CoV.2.S1.HisTag                  | feature_id[2].value <= threshold=-383.86944580078125 |
| Class: healthcare workers 60–180 days after vaccination    |                                                      |

(4) Rules on the mRMR feature list

|                                                         |                                                     |
|---------------------------------------------------------|-----------------------------------------------------|
| Rules_0                                                 | passed counts:168                                   |
| node_0: feature_name=HuIgG_0.10                         | feature_id[1].value <= threshold=19120.166015625    |
| node_1: feature_name=SARS.CoV.2.S1.mFcTag               | feature_id[3].value > threshold=5354.388916015625   |
| node_9: feature_name=a-HuIgG_0.30                       | feature_id[4].value <= threshold=33726.833984375    |
| node_10: feature_name=HuIgG_0.03                        | feature_id[5].value > threshold=1023.1666564941406  |
| node_20: feature_name=hCoV.HKU1.NP                      | feature_id[10].value > threshold=-20.05833387374878 |
| node_22: feature_name=SARS.CoV.S1.HisTag                | feature_id[6].value > threshold=400.3000030517578   |
| node_26: feature_name=SARS.CoV.S1.HisTag                | feature_id[6].value <= threshold=15087.41650390625  |
| node_27: feature_name=SARS.CoV.2.S1.RBD.mFc             | feature_id[0].value <= threshold=43991.083984375    |
| node_28: feature_name=SARS.CoV.2.S1.RBD.mFc             | feature_id[0].value <= threshold=33656.484375       |
| Class: healthcare workers 60–180 days after vaccination |                                                     |
|                                                         |                                                     |
| Rules_1                                                 | passed counts:75                                    |
| node_0: feature_name=HuIgG_0.10                         | feature_id[1].value <= threshold=19120.166015625    |
| node_1: feature_name=SARS.CoV.2.S1.mFcTag               | feature_id[3].value <= threshold=5354.388916015625  |
| node_2: feature_name=SARS.CoV.S1.HisTag                 | feature_id[6].value > threshold=-423.2833251953125  |
| node_4: feature_name=SARS.CoV.2.S2                      | feature_id[2].value > threshold=566.3889007568359   |
| Class: unvaccinated healthcare workers                  |                                                     |
|                                                         |                                                     |
| Rules_2                                                 | passed counts:71                                    |
| node_0: feature_name=HuIgG_0.10                         | feature_id[1].value <= threshold=19120.166015625    |
| node_1: feature_name=SARS.CoV.2.S1.mFcTag               | feature_id[3].value > threshold=5354.388916015625   |
| node_9: feature_name=a-HuIgG_0.30                       | feature_id[4].value <= threshold=33726.833984375    |
| node_10: feature_name=HuIgG_0.03                        | feature_id[5].value > threshold=1023.1666564941406  |
| node_20: feature_name=hCoV.HKU1.NP                      | feature_id[10].value > threshold=-20.05833387374878 |



|                                                            |                                                     |
|------------------------------------------------------------|-----------------------------------------------------|
| node_22: feature_name=SARS.CoV.S1.HisTag                   | feature_id[6].value > threshold=400.3000030517578   |
| node_26: feature_name=SARS.CoV.S1.HisTag                   | feature_id[6].value <= threshold=15087.41650390625  |
| node_27: feature_name=SARS.CoV.2.S1.RBD.mFc                | feature_id[0].value <= threshold=43991.083984375    |
| node_28: feature_name=SARS.CoV.2.S1.RBD.mFc                | feature_id[0].value > threshold=33656.484375        |
| node_30: feature_name=SARS.CoV.2.S1+S2                     | feature_id[12].value > threshold=30126.75           |
| Class: healthcare workers 60–180 days after vaccination    |                                                     |
|                                                            |                                                     |
| Rules_3                                                    | passed counts:59                                    |
| node_0: feature_name=HuIgG_0.10                            | feature_id[1].value > threshold=19120.166015625     |
| node_112: feature_name=a-HuIgG_0.03                        | feature_id[8].value <= threshold=19665.666015625    |
| node_113: feature_name=SARS.CoV.2.S1.mFcTag                | feature_id[3].value <= threshold=54010.166015625    |
| node_114: feature_name=SARS.CoV.2.S1+S2                    | feature_id[12].value > threshold=47258.43359375     |
| node_240: feature_name=HuIgG_0.03                          | feature_id[5].value > threshold=5455.5              |
| node_266: feature_name=HuIgG_0.10                          | feature_id[1].value > threshold=24231.0             |
| node_284: feature_name=HuIgG_0.03                          | feature_id[5].value > threshold=5469.0              |
| node_286: feature_name=HuIgG_0.10                          | feature_id[1].value <= threshold=30107.666015625    |
| node_287: feature_name=SARS.CoV.2.S1+S2                    | feature_id[12].value > threshold=47536.224609375    |
| node_291: feature_name=SARS.CoV.2.S2                       | feature_id[2].value > threshold=37653.75            |
| node_329: feature_name=SARS.CoV.2.S1.mFcTag                | feature_id[3].value <= threshold=53346.333984375    |
| node_330: feature_name=Flu.B_Phu/.HA1+HA2                  | feature_id[11].value <= threshold=53733.0           |
| node_331: feature_name=MoIgA_0.10                          | feature_id[13].value > threshold=10.833333015441895 |
| node_335: feature_name=a-HuIgG_0.03                        | feature_id[8].value > threshold=11890.0             |
| Class: healthcare workers within 60 days after vaccination |                                                     |
|                                                            |                                                     |
| Rules_4                                                    | passed counts:56                                    |

|                                                            |                                                     |
|------------------------------------------------------------|-----------------------------------------------------|
| node_0: feature_name=HuIgG_0.10                            | feature_id[1].value > threshold=19120.166015625     |
| node_112: feature_name=a-HuIgG_0.03                        | feature_id[8].value <= threshold=19665.666015625    |
| node_113: feature_name=SARS.CoV.2.S1.mFcTag                | feature_id[3].value <= threshold=54010.166015625    |
| node_114: feature_name=SARS.CoV.2.S1+S2                    | feature_id[12].value > threshold=47258.43359375     |
| node_240: feature_name=HuIgG_0.03                          | feature_id[5].value <= threshold=5455.5             |
| node_241: feature_name=SARS.CoV.S1.HisTag                  | feature_id[6].value > threshold=745.7222290039062   |
| node_243: feature_name=SARS.CoV.2.S1+S2                    | feature_id[12].value > threshold=48812.91796875     |
| node_253: feature_name=SARS.CoV.S1.HisTag                  | feature_id[6].value > threshold=2772.300048828125   |
| node_257: feature_name=HuIgG_0.10                          | feature_id[1].value <= threshold=26991.8330078125   |
| node_258: feature_name=SARS.CoV.2.S1.RBD.mFc               | feature_id[0].value > threshold=41406.666015625     |
| Class: healthcare workers within 60 days after vaccination |                                                     |
|                                                            |                                                     |
| Rules_5                                                    | passed counts:39                                    |
| node_0: feature_name=HuIgG_0.10                            | feature_id[1].value > threshold=19120.166015625     |
| node_112: feature_name=a-HuIgG_0.03                        | feature_id[8].value <= threshold=19665.666015625    |
| node_113: feature_name=SARS.CoV.2.S1.mFcTag                | feature_id[3].value <= threshold=54010.166015625    |
| node_114: feature_name=SARS.CoV.2.S1+S2                    | feature_id[12].value <= threshold=47258.43359375    |
| node_115: feature_name=SARS.CoV.2.S1.RBD.mFc               | feature_id[0].value > threshold=301.73333740234375  |
| node_131: feature_name=a-HuIgG_0.03                        | feature_id[8].value <= threshold=12099.83349609375  |
| node_132: feature_name=SARS.CoV.2.S2                       | feature_id[2].value > threshold=8858.0751953125     |
| node_134: feature_name=Flu.B_Phu/.HA1+HA2                  | feature_id[11].value <= threshold=53839.16796875    |
| node_135: feature_name=hCoV.HKU1.NP                        | feature_id[10].value > threshold=1010.1666564941406 |
| node_145: feature_name=hCoV.HKU1.NP                        | feature_id[10].value <= threshold=15374.16650390625 |
| node_146: feature_name=SARS.CoV.2.S1.mFcTag                | feature_id[3].value <= threshold=50683.0            |
| node_147: feature_name=SARS.CoV.2.Spike.RBD.rFc            | feature_id[9].value <= threshold=45822.583984375    |

|                                                            |                                                      |
|------------------------------------------------------------|------------------------------------------------------|
| node_148: feature_name=SARS.CoV.2.S2                       | feature_id[2].value > threshold=10212.125            |
| node_154: feature_name=Flu.B_Phu/.HA1+HA2                  | feature_id[11].value > threshold=49488.1171875       |
| node_162: feature_name=MoIgA_0.10                          | feature_id[13].value <= threshold=2877.1666259765625 |
| Class: healthcare workers within 60 days after vaccination |                                                      |
|                                                            |                                                      |
| Rules_6                                                    | passed counts:31                                     |
| node_0: feature_name=HuIgG_0.10                            | feature_id[1].value > threshold=19120.166015625      |
| node_112: feature_name=a-HuIgG_0.03                        | feature_id[8].value <= threshold=19665.666015625     |
| node_113: feature_name=SARS.CoV.2.S1.mFcTag                | feature_id[3].value <= threshold=54010.166015625     |
| node_114: feature_name=SARS.CoV.2.S1+S2                    | feature_id[12].value > threshold=47258.43359375      |
| node_240: feature_name=HuIgG_0.03                          | feature_id[5].value > threshold=5455.5               |
| node_266: feature_name=HuIgG_0.10                          | feature_id[1].value > threshold=24231.0              |
| node_284: feature_name=HuIgG_0.03                          | feature_id[5].value > threshold=5469.0               |
| node_286: feature_name=HuIgG_0.10                          | feature_id[1].value <= threshold=30107.666015625     |
| node_287: feature_name=SARS.CoV.2.S1+S2                    | feature_id[12].value > threshold=47536.224609375     |
| node_291: feature_name=SARS.CoV.2.S2                       | feature_id[2].value <= threshold=37653.75            |
| node_292: feature_name=SARS.CoV.2.S2                       | feature_id[2].value <= threshold=36044.29296875      |
| node_293: feature_name=HuIgG_0.03                          | feature_id[5].value <= threshold=6329.5              |
| node_294: feature_name=Flu.B_Phu/.HA1+HA2                  | feature_id[11].value > threshold=50410.16796875      |
| node_296: feature_name=HuIgG_0.03                          | feature_id[5].value > threshold=5639.0               |
| Class: healthcare workers within 60 days after vaccination |                                                      |
|                                                            |                                                      |
| Rules_7                                                    | passed counts:28                                     |
| node_0: feature_name=HuIgG_0.10                            | feature_id[1].value <= threshold=19120.166015625     |
| node_1: feature_name=SARS.CoV.2.S1.mFcTag                  | feature_id[3].value > threshold=5354.388916015625    |

|                                                           |                                                     |
|-----------------------------------------------------------|-----------------------------------------------------|
| node_9: feature_name=a-HuIgG_0.30                         | feature_id[4].value <= threshold=33726.833984375    |
| node_10: feature_name=HuIgG_0.03                          | feature_id[5].value <= threshold=1023.1666564941406 |
| node_11: feature_name=SARS.CoV.2.S1.mFcTag                | feature_id[3].value <= threshold=34194.916015625    |
| node_12: feature_name=hCoV.NL63.S1_S2                     | feature_id[7].value <= threshold=23953.708984375    |
| Class: healthcare workers over 180 days after vaccination |                                                     |
| Rules_8                                                   | passed counts:23                                    |
| node_0: feature_name=HuIgG_0.10                           | feature_id[1].value > threshold=19120.166015625     |
| node_112: feature_name=a-HuIgG_0.03                       | feature_id[8].value <= threshold=19665.666015625    |
| node_113: feature_name=SARS.CoV.2.S1.mFcTag               | feature_id[3].value > threshold=54010.166015625     |
| node_351: feature_name=SARS.CoV.2.S2                      | feature_id[2].value <= threshold=37075.75           |
| node_352: feature_name=a-HuIgG_0.03                       | feature_id[8].value <= threshold=17721.1669921875   |
| node_353: feature_name=MoIgA_0.10                         | feature_id[13].value > threshold=536.0              |
| node_367: feature_name=HuIgG_0.03                         | feature_id[5].value > threshold=5634.333251953125   |
| node_381: feature_name=MoIgA_0.10                         | feature_id[13].value <= threshold=15050.5           |
| Class: healthcare workers 60–180 days after vaccination   |                                                     |
| Rules_9                                                   | passed counts:23                                    |
| node_0: feature_name=HuIgG_0.10                           | feature_id[1].value > threshold=19120.166015625     |
| node_112: feature_name=a-HuIgG_0.03                       | feature_id[8].value <= threshold=19665.666015625    |
| node_113: feature_name=SARS.CoV.2.S1.mFcTag               | feature_id[3].value <= threshold=54010.166015625    |
| node_114: feature_name=SARS.CoV.2.S1+S2                   | feature_id[12].value > threshold=47258.43359375     |
| node_240: feature_name=HuIgG_0.03                         | feature_id[5].value > threshold=5455.5              |
| node_266: feature_name=HuIgG_0.10                         | feature_id[1].value > threshold=24231.0             |
| node_284: feature_name=HuIgG_0.03                         | feature_id[5].value > threshold=5469.0              |

|                                                            |                                                     |
|------------------------------------------------------------|-----------------------------------------------------|
| node_286: feature_name=HuIgG_0.10                          | feature_id[1].value <= threshold=30107.666015625    |
| node_287: feature_name=SARS.CoV.2.S1+S2                    | feature_id[12].value > threshold=47536.224609375    |
| node_291: feature_name=SARS.CoV.2.S2                       | feature_id[2].value <= threshold=37653.75           |
| node_292: feature_name=SARS.CoV.2.S2                       | feature_id[2].value <= threshold=36044.29296875     |
| node_293: feature_name=HuIgG_0.03                          | feature_id[5].value > threshold=6329.5              |
| node_301: feature_name=HuIgG_0.03                          | feature_id[5].value > threshold=6562.16650390625    |
| node_307: feature_name=Flu.B_Phu/.HA1+HA2                  | feature_id[11].value <= threshold=54123.5           |
| node_308: feature_name=MoIgA_0.10                          | feature_id[13].value > threshold=21.166666984558105 |
| node_310: feature_name=hCoV.NL63.S1_S2                     | feature_id[7].value > threshold=33291.458984375     |
| node_314: feature_name=SARS.CoV.2.S1.mFcTag                | feature_id[3].value > threshold=50604.0             |
| Class: healthcare workers within 60 days after vaccination |                                                     |
|                                                            |                                                     |
| Rules_10                                                   | passed counts:21                                    |
| node_0: feature_name=HuIgG_0.10                            | feature_id[1].value > threshold=19120.166015625     |
| node_112: feature_name=a-HuIgG_0.03                        | feature_id[8].value > threshold=19665.666015625     |
| node_428: feature_name=SARS.CoV.2.Spike.RBD.rFc            | feature_id[9].value <= threshold=55147.1484375      |
| node_429: feature_name=a-HuIgG_0.30                        | feature_id[4].value > threshold=51289.166015625     |
| node_437: feature_name=HuIgG_0.10                          | feature_id[1].value <= threshold=25959.0            |
| node_438: feature_name=HuIgG_0.03                          | feature_id[5].value <= threshold=7564.833251953125  |
| Class: healthcare workers over 180 days after vaccination  |                                                     |
|                                                            |                                                     |
| Rules_11                                                   | passed counts:21                                    |
| node_0: feature_name=HuIgG_0.10                            | feature_id[1].value <= threshold=19120.166015625    |
| node_1: feature_name=SARS.CoV.2.S1.mFcTag                  | feature_id[3].value > threshold=5354.388916015625   |
| node_9: feature_name=a-HuIgG_0.30                          | feature_id[4].value > threshold=33726.833984375     |

|                                                           |                                                     |
|-----------------------------------------------------------|-----------------------------------------------------|
| node_55: feature_name=SARS.CoV.2.S1.mFcTag                | feature_id[3].value <= threshold=43185.68359375     |
| node_56: feature_name=SARS.CoV.S1.HisTag                  | feature_id[6].value > threshold=1493.4166870117188  |
| node_62: feature_name=SARS.CoV.2.S1+S2                    | feature_id[12].value > threshold=22078.1669921875   |
| Class: healthcare workers over 180 days after vaccination |                                                     |
|                                                           |                                                     |
| Rules_12                                                  | passed counts:20                                    |
| node_0: feature_name=HuIgG_0.10                           | feature_id[1].value > threshold=19120.166015625     |
| node_112: feature_name=a-HuIgG_0.03                       | feature_id[8].value <= threshold=19665.666015625    |
| node_113: feature_name=SARS.CoV.2.S1.mFcTag               | feature_id[3].value <= threshold=54010.166015625    |
| node_114: feature_name=SARS.CoV.2.S1+S2                   | feature_id[12].value <= threshold=47258.43359375    |
| node_115: feature_name=SARS.CoV.2.S1.RBD.mFc              | feature_id[0].value > threshold=301.73333740234375  |
| node_131: feature_name=a-HuIgG_0.03                       | feature_id[8].value > threshold=12099.83349609375   |
| node_183: feature_name=Flu.B_Phu/.HA1+HA2                 | feature_id[11].value > threshold=41918.533203125    |
| node_187: feature_name=SARS.CoV.2.Spike.RBD.rFc           | feature_id[9].value > threshold=27438.341796875     |
| node_197: feature_name=SARS.CoV.2.S2                      | feature_id[2].value <= threshold=35177.640625       |
| node_198: feature_name=hCoV.HKU1.NP                       | feature_id[10].value <= threshold=2645.916748046875 |
| node_199: feature_name=hCoV.HKU1.NP                       | feature_id[10].value > threshold=666.6666870117188  |
| node_203: feature_name=HuIgG_0.10                         | feature_id[1].value <= threshold=24756.5            |
| Class: healthcare workers 60–180 days after vaccination   |                                                     |
|                                                           |                                                     |
| Rules_13                                                  | passed counts:18                                    |
| node_0: feature_name=HuIgG_0.10                           | feature_id[1].value > threshold=19120.166015625     |
| node_112: feature_name=a-HuIgG_0.03                       | feature_id[8].value <= threshold=19665.666015625    |
| node_113: feature_name=SARS.CoV.2.S1.mFcTag               | feature_id[3].value > threshold=54010.166015625     |
| node_351: feature_name=SARS.CoV.2.S2                      | feature_id[2].value > threshold=37075.75            |

|                                                            |                                                     |
|------------------------------------------------------------|-----------------------------------------------------|
| node_391: feature_name=SARS.CoV.2.S1.mFcTag                | feature_id[3].value <= threshold=55462.833984375    |
| node_392: feature_name=SARS.CoV.2.S1.mFcTag                | feature_id[3].value <= threshold=55163.634765625    |
| node_393: feature_name=hCoV.HKU1.NP                        | feature_id[10].value <= threshold=14561.3330078125  |
| node_394: feature_name=hCoV.HKU1.NP                        | feature_id[10].value <= threshold=6453.333251953125 |
| node_395: feature_name=hCoV.HKU1.NP                        | feature_id[10].value > threshold=1990.1666259765625 |
| node_407: feature_name=SARS.CoV.2.S1.RBD.mFc               | feature_id[0].value > threshold=48385.75            |
| node_409: feature_name=MoIgA_0.10                          | feature_id[13].value <= threshold=21414.99951171875 |
| Class: healthcare workers within 60 days after vaccination |                                                     |
|                                                            |                                                     |
| Rules_14                                                   | passed counts:17                                    |
| node_0: feature_name=HuIgG_0.10                            | feature_id[1].value > threshold=19120.166015625     |
| node_112: feature_name=a-HuIgG_0.03                        | feature_id[8].value <= threshold=19665.666015625    |
| node_113: feature_name=SARS.CoV.2.S1.mFcTag                | feature_id[3].value <= threshold=54010.166015625    |
| node_114: feature_name=SARS.CoV.2.S1+S2                    | feature_id[12].value <= threshold=47258.43359375    |
| node_115: feature_name=SARS.CoV.2.S1.RBD.mFc               | feature_id[0].value > threshold=301.73333740234375  |
| node_131: feature_name=a-HuIgG_0.03                        | feature_id[8].value <= threshold=12099.83349609375  |
| node_132: feature_name=SARS.CoV.2.S2                       | feature_id[2].value > threshold=8858.0751953125     |
| node_134: feature_name=Flu.B_Phu/.HA1+HA2                  | feature_id[11].value <= threshold=53839.16796875    |
| node_135: feature_name=hCoV.HKU1.NP                        | feature_id[10].value > threshold=1010.1666564941406 |
| node_145: feature_name=hCoV.HKU1.NP                        | feature_id[10].value <= threshold=15374.16650390625 |
| node_146: feature_name=SARS.CoV.2.S1.mFcTag                | feature_id[3].value > threshold=50683.0             |
| node_168: feature_name=HuIgG_0.10                          | feature_id[1].value > threshold=20669.833984375     |
| node_170: feature_name=SARS.CoV.2.S1.mFcTag                | feature_id[3].value > threshold=50874.666015625     |
| node_172: feature_name=SARS.CoV.S1.HisTag                  | feature_id[6].value > threshold=3796.25             |
| Class: healthcare workers within 60 days after vaccination |                                                     |

|                                                            |                                                    |
|------------------------------------------------------------|----------------------------------------------------|
|                                                            |                                                    |
| Rules_15                                                   | passed counts:15                                   |
| node_0: feature_name=HuIgG_0.10                            | feature_id[1].value > threshold=19120.166015625    |
| node_112: feature_name=a-HuIgG_0.03                        | feature_id[8].value <= threshold=19665.666015625   |
| node_113: feature_name=SARS.CoV.2.S1.mFcTag                | feature_id[3].value <= threshold=54010.166015625   |
| node_114: feature_name=SARS.CoV.2.S1+S2                    | feature_id[12].value > threshold=47258.43359375    |
| node_240: feature_name=HuIgG_0.03                          | feature_id[5].value <= threshold=5455.5            |
| node_241: feature_name=SARS.CoV.S1.HisTag                  | feature_id[6].value > threshold=745.7222290039062  |
| node_243: feature_name=SARS.CoV.2.S1+S2                    | feature_id[12].value <= threshold=48812.91796875   |
| node_244: feature_name=SARS.CoV.2.S2                       | feature_id[2].value <= threshold=26981.416015625   |
| Class: healthcare workers within 60 days after vaccination |                                                    |
|                                                            |                                                    |
| Rules_16                                                   | passed counts:15                                   |
| node_0: feature_name=HuIgG_0.10                            | feature_id[1].value > threshold=19120.166015625    |
| node_112: feature_name=a-HuIgG_0.03                        | feature_id[8].value <= threshold=19665.666015625   |
| node_113: feature_name=SARS.CoV.2.S1.mFcTag                | feature_id[3].value <= threshold=54010.166015625   |
| node_114: feature_name=SARS.CoV.2.S1+S2                    | feature_id[12].value <= threshold=47258.43359375   |
| node_115: feature_name=SARS.CoV.2.S1.RBD.mFc               | feature_id[0].value > threshold=301.73333740234375 |
| node_131: feature_name=a-HuIgG_0.03                        | feature_id[8].value > threshold=12099.83349609375  |
| node_183: feature_name=Flu.B_Phu/.HA1+HA2                  | feature_id[11].value > threshold=41918.533203125   |
| node_187: feature_name=SARS.CoV.2.Spike.RBD.rFc            | feature_id[9].value > threshold=27438.341796875    |
| node_197: feature_name=SARS.CoV.2.S2                       | feature_id[2].value <= threshold=35177.640625      |
| node_198: feature_name=hCoV.HKU1.NP                        | feature_id[10].value > threshold=2645.916748046875 |
| node_210: feature_name=Flu.B_Phu/.HA1+HA2                  | feature_id[11].value <= threshold=54029.166015625  |
| node_211: feature_name=HuIgG_0.10                          | feature_id[1].value > threshold=21359.5            |



|                                                         |                                                      |
|---------------------------------------------------------|------------------------------------------------------|
| node_213: feature_name=hCoV.NL63.S1_S2                  | feature_id[7].value > threshold=32523.4248046875     |
| node_215: feature_name=HuIgG_0.10                       | feature_id[1].value > threshold=23274.166015625      |
| node_217: feature_name=HuIgG_0.10                       | feature_id[1].value <= threshold=25231.1669921875    |
| node_218: feature_name=hCoV.HKU1.NP                     | feature_id[10].value > threshold=3712.083251953125   |
| node_220: feature_name=SARS.CoV.S1.HisTag               | feature_id[6].value <= threshold=11696.75            |
| node_221: feature_name=MoIgA_0.10                       | feature_id[13].value <= threshold=2253.6666259765625 |
| Class: healthcare workers 60–180 days after vaccination |                                                      |
|                                                         |                                                      |
| Rules_17                                                | passed counts:15                                     |
| node_0: feature_name=HuIgG_0.10                         | feature_id[1].value <= threshold=19120.166015625     |
| node_1: feature_name=SARS.CoV.2.S1.mFcTag               | feature_id[3].value > threshold=5354.388916015625    |
| node_9: feature_name=a-HuIgG_0.30                       | feature_id[4].value <= threshold=33726.833984375     |
| node_10: feature_name=HuIgG_0.03                        | feature_id[5].value > threshold=1023.1666564941406   |
| node_20: feature_name=hCoV.HKU1.NP                      | feature_id[10].value > threshold=-20.05833387374878  |
| node_22: feature_name=SARS.CoV.S1.HisTag                | feature_id[6].value > threshold=400.3000030517578    |
| node_26: feature_name=SARS.CoV.S1.HisTag                | feature_id[6].value > threshold=15087.41650390625    |
| node_38: feature_name=hCoV.HKU1.NP                      | feature_id[10].value > threshold=348.6666564941406   |
| node_46: feature_name=SARS.CoV.2.S2                     | feature_id[2].value > threshold=21127.650390625      |
| node_50: feature_name=a-HuIgG_0.03                      | feature_id[8].value <= threshold=11226.33349609375   |
| Class: healthcare workers 60–180 days after vaccination |                                                      |
|                                                         |                                                      |
| Rules_18                                                | passed counts:14                                     |
| node_0: feature_name=HuIgG_0.10                         | feature_id[1].value > threshold=19120.166015625      |
| node_112: feature_name=a-HuIgG_0.03                     | feature_id[8].value <= threshold=19665.666015625     |
| node_113: feature_name=SARS.CoV.2.S1.mFcTag             | feature_id[3].value > threshold=54010.166015625      |

|                                                         |                                                    |
|---------------------------------------------------------|----------------------------------------------------|
| node_351: feature_name=SARS.CoV.2.S2                    | feature_id[2].value > threshold=37075.75           |
| node_391: feature_name=SARS.CoV.2.S1.mFcTag             | feature_id[3].value <= threshold=55462.833984375   |
| node_392: feature_name=SARS.CoV.2.S1.mFcTag             | feature_id[3].value <= threshold=55163.634765625   |
| node_393: feature_name=hCoV.HKU1.NP                     | feature_id[10].value <= threshold=14561.3330078125 |
| node_394: feature_name=hCoV.HKU1.NP                     | feature_id[10].value > threshold=6453.333251953125 |
| node_412: feature_name=HuIgG_0.03                       | feature_id[5].value > threshold=4766.166748046875  |
| node_414: feature_name=MoIgA_0.10                       | feature_id[13].value <= threshold=2918.0           |
| Class: healthcare workers 60–180 days after vaccination |                                                    |
|                                                         |                                                    |
| Rules_19                                                | passed counts:14                                   |
| node_0: feature_name=HuIgG_0.10                         | feature_id[1].value > threshold=19120.166015625    |
| node_112: feature_name=a-HuIgG_0.03                     | feature_id[8].value <= threshold=19665.666015625   |
| node_113: feature_name=SARS.CoV.2.S1.mFcTag             | feature_id[3].value <= threshold=54010.166015625   |
| node_114: feature_name=SARS.CoV.2.S1+S2                 | feature_id[12].value <= threshold=47258.43359375   |
| node_115: feature_name=SARS.CoV.2.S1.RBD.mFc            | feature_id[0].value > threshold=301.73333740234375 |
| node_131: feature_name=a-HuIgG_0.03                     | feature_id[8].value > threshold=12099.83349609375  |
| node_183: feature_name=Flu.B_Phu/.HA1+HA2               | feature_id[11].value > threshold=41918.533203125   |
| node_187: feature_name=SARS.CoV.2.Spike.RBD.rFc         | feature_id[9].value > threshold=27438.341796875    |
| node_197: feature_name=SARS.CoV.2.S2                    | feature_id[2].value <= threshold=35177.640625      |
| node_198: feature_name=hCoV.HKU1.NP                     | feature_id[10].value > threshold=2645.916748046875 |
| node_210: feature_name=Flu.B_Phu/.HA1+HA2               | feature_id[11].value > threshold=54029.166015625   |
| node_236: feature_name=SARS.CoV.2.S1.RBD.mFc            | feature_id[0].value <= threshold=47021.16796875    |
| Class: healthcare workers 60–180 days after vaccination |                                                    |
|                                                         |                                                    |
| Rules_20                                                | passed counts:14                                   |

|                                                            |                                                    |
|------------------------------------------------------------|----------------------------------------------------|
| node_0: feature_name=HuIgG_0.10                            | feature_id[1].value > threshold=19120.166015625    |
| node_112: feature_name=a-HuIgG_0.03                        | feature_id[8].value <= threshold=19665.666015625   |
| node_113: feature_name=SARS.CoV.2.S1.mFcTag                | feature_id[3].value <= threshold=54010.166015625   |
| node_114: feature_name=SARS.CoV.2.S1+S2                    | feature_id[12].value <= threshold=47258.43359375   |
| node_115: feature_name=SARS.CoV.2.S1.RBD.mFc               | feature_id[0].value > threshold=301.73333740234375 |
| node_131: feature_name=a-HuIgG_0.03                        | feature_id[8].value > threshold=12099.83349609375  |
| node_183: feature_name=Flu.B_Phu/.HA1+HA2                  | feature_id[11].value > threshold=41918.533203125   |
| node_187: feature_name=SARS.CoV.2.Spike.RBD.rFc            | feature_id[9].value > threshold=27438.341796875    |
| node_197: feature_name=SARS.CoV.2.S2                       | feature_id[2].value <= threshold=35177.640625      |
| node_198: feature_name=hCoV.HKU1.NP                        | feature_id[10].value > threshold=2645.916748046875 |
| node_210: feature_name=Flu.B_Phu/.HA1+HA2                  | feature_id[11].value <= threshold=54029.166015625  |
| node_211: feature_name=HuIgG_0.10                          | feature_id[1].value > threshold=21359.5            |
| node_213: feature_name=hCoV.NL63.S1_S2                     | feature_id[7].value > threshold=32523.4248046875   |
| node_215: feature_name=HuIgG_0.10                          | feature_id[1].value > threshold=23274.166015625    |
| node_217: feature_name=HuIgG_0.10                          | feature_id[1].value > threshold=25231.1669921875   |
| node_227: feature_name=SARS.CoV.2.S2                       | feature_id[2].value > threshold=18038.125          |
| node_231: feature_name=a-HuIgG_0.03                        | feature_id[8].value > threshold=12541.1669921875   |
| node_233: feature_name=SARS.CoV.2.S1+S2                    | feature_id[12].value <= threshold=47171.75         |
| Class: healthcare workers within 60 days after vaccination |                                                    |
|                                                            |                                                    |
| Rules_21                                                   | passed counts:13                                   |
| node_0: feature_name=HuIgG_0.10                            | feature_id[1].value > threshold=19120.166015625    |
| node_112: feature_name=a-HuIgG_0.03                        | feature_id[8].value <= threshold=19665.666015625   |
| node_113: feature_name=SARS.CoV.2.S1.mFcTag                | feature_id[3].value <= threshold=54010.166015625   |
| node_114: feature_name=SARS.CoV.2.S1+S2                    | feature_id[12].value <= threshold=47258.43359375   |

|                                                            |                                                     |
|------------------------------------------------------------|-----------------------------------------------------|
| node_115: feature_name=SARS.CoV.2.S1.RBD.mFc               | feature_id[0].value > threshold=301.73333740234375  |
| node_131: feature_name=a-HuIgG_0.03                        | feature_id[8].value <= threshold=12099.83349609375  |
| node_132: feature_name=SARS.CoV.2.S2                       | feature_id[2].value > threshold=8858.0751953125     |
| node_134: feature_name=Flu.B_Phu/.HA1+HA2                  | feature_id[11].value <= threshold=53839.16796875    |
| node_135: feature_name=hCoV.HKU1.NP                        | feature_id[10].value > threshold=1010.1666564941406 |
| node_145: feature_name=hCoV.HKU1.NP                        | feature_id[10].value <= threshold=15374.16650390625 |
| node_146: feature_name=SARS.CoV.2.S1.mFcTag                | feature_id[3].value <= threshold=50683.0            |
| node_147: feature_name=SARS.CoV.2.Spike.RBD.rFc            | feature_id[9].value <= threshold=45822.583984375    |
| node_148: feature_name=SARS.CoV.2.S2                       | feature_id[2].value > threshold=10212.125           |
| node_154: feature_name=Flu.B_Phu/.HA1+HA2                  | feature_id[11].value <= threshold=49488.1171875     |
| node_155: feature_name=MoIgA_0.10                          | feature_id[13].value > threshold=177.66666412353516 |
| node_157: feature_name=a-HuIgG_0.03                        | feature_id[8].value <= threshold=11251.0            |
| Class: healthcare workers within 60 days after vaccination |                                                     |
|                                                            |                                                     |
| Rules_22                                                   | passed counts:12                                    |
| node_0: feature_name=HuIgG_0.10                            | feature_id[1].value > threshold=19120.166015625     |
| node_112: feature_name=a-HuIgG_0.03                        | feature_id[8].value <= threshold=19665.666015625    |
| node_113: feature_name=SARS.CoV.2.S1.mFcTag                | feature_id[3].value > threshold=54010.166015625     |
| node_351: feature_name=SARS.CoV.2.S2                       | feature_id[2].value > threshold=37075.75            |
| node_391: feature_name=SARS.CoV.2.S1.mFcTag                | feature_id[3].value <= threshold=55462.833984375    |
| node_392: feature_name=SARS.CoV.2.S1.mFcTag                | feature_id[3].value > threshold=55163.634765625     |
| node_420: feature_name=SARS.CoV.2.S1+S2                    | feature_id[12].value <= threshold=54621.0           |
| Class: healthcare workers within 60 days after vaccination |                                                     |
|                                                            |                                                     |
| Rules_23                                                   | passed counts:12                                    |

|                                                            |                                                     |
|------------------------------------------------------------|-----------------------------------------------------|
| node_0: feature_name=HuIgG_0.10                            | feature_id[1].value > threshold=19120.166015625     |
| node_112: feature_name=a-HuIgG_0.03                        | feature_id[8].value <= threshold=19665.666015625    |
| node_113: feature_name=SARS.CoV.2.S1.mFcTag                | feature_id[3].value <= threshold=54010.166015625    |
| node_114: feature_name=SARS.CoV.2.S1+S2                    | feature_id[12].value <= threshold=47258.43359375    |
| node_115: feature_name=SARS.CoV.2.S1.RBD.mFc               | feature_id[0].value > threshold=301.73333740234375  |
| node_131: feature_name=a-HuIgG_0.03                        | feature_id[8].value > threshold=12099.83349609375   |
| node_183: feature_name=Flu.B_Phu/.HA1+HA2                  | feature_id[11].value > threshold=41918.533203125    |
| node_187: feature_name=SARS.CoV.2.Spike.RBD.rFc            | feature_id[9].value > threshold=27438.341796875     |
| node_197: feature_name=SARS.CoV.2.S2                       | feature_id[2].value <= threshold=35177.640625       |
| node_198: feature_name=hCoV.HKU1.NP                        | feature_id[10].value > threshold=2645.916748046875  |
| node_210: feature_name=Flu.B_Phu/.HA1+HA2                  | feature_id[11].value <= threshold=54029.166015625   |
| node_211: feature_name=HuIgG_0.10                          | feature_id[1].value > threshold=21359.5             |
| node_213: feature_name=hCoV.NL63.S1_S2                     | feature_id[7].value <= threshold=32523.4248046875   |
| Class: healthcare workers within 60 days after vaccination |                                                     |
|                                                            |                                                     |
| Rules_24                                                   | passed counts:12                                    |
| node_0: feature_name=HuIgG_0.10                            | feature_id[1].value > threshold=19120.166015625     |
| node_112: feature_name=a-HuIgG_0.03                        | feature_id[8].value <= threshold=19665.666015625    |
| node_113: feature_name=SARS.CoV.2.S1.mFcTag                | feature_id[3].value <= threshold=54010.166015625    |
| node_114: feature_name=SARS.CoV.2.S1+S2                    | feature_id[12].value <= threshold=47258.43359375    |
| node_115: feature_name=SARS.CoV.2.S1.RBD.mFc               | feature_id[0].value <= threshold=301.73333740234375 |
| node_116: feature_name=SARS.CoV.2.S1+S2                    | feature_id[12].value > threshold=3298.25            |
| node_122: feature_name=SARS.CoV.2.S1.mFcTag                | feature_id[3].value > threshold=-1493.1666870117188 |
| node_124: feature_name=hCoV.HKU1.NP                        | feature_id[10].value <= threshold=11908.138671875   |
| node_125: feature_name=SARS.CoV.2.S1.RBD.mFc               | feature_id[0].value <= threshold=82.01666641235352  |

|                                                            |                                                   |
|------------------------------------------------------------|---------------------------------------------------|
| Class: unvaccinated healthcare workers                     |                                                   |
|                                                            |                                                   |
| Rules_25                                                   | passed counts:12                                  |
| node_0: feature_name=HuIgG_0.10                            | feature_id[1].value <= threshold=19120.166015625  |
| node_1: feature_name=SARS.CoV.2.S1.mFcTag                  | feature_id[3].value > threshold=5354.388916015625 |
| node_9: feature_name=a-HuIgG_0.30                          | feature_id[4].value > threshold=33726.833984375   |
| node_55: feature_name=SARS.CoV.2.S1.mFcTag                 | feature_id[3].value > threshold=43185.68359375    |
| node_67: feature_name=a-HuIgG_0.03                         | feature_id[8].value > threshold=10858.0           |
| node_83: feature_name=HuIgG_0.03                           | feature_id[5].value <= threshold=3796.0           |
| node_84: feature_name=hCoV.NL63.S1_S2                      | feature_id[7].value > threshold=29814.5           |
| node_96: feature_name=hCoV.NL63.S1_S2                      | feature_id[7].value <= threshold=34078.0          |
| Class: healthcare workers over 180 days after vaccination  |                                                   |
|                                                            |                                                   |
| Rules_26                                                   | passed counts:11                                  |
| node_0: feature_name=HuIgG_0.10                            | feature_id[1].value > threshold=19120.166015625   |
| node_112: feature_name=a-HuIgG_0.03                        | feature_id[8].value <= threshold=19665.666015625  |
| node_113: feature_name=SARS.CoV.2.S1.mFcTag                | feature_id[3].value <= threshold=54010.166015625  |
| node_114: feature_name=SARS.CoV.2.S1+S2                    | feature_id[12].value > threshold=47258.43359375   |
| node_240: feature_name=HuIgG_0.03                          | feature_id[5].value <= threshold=5455.5           |
| node_241: feature_name=SARS.CoV.S1.HisTag                  | feature_id[6].value > threshold=745.7222290039062 |
| node_243: feature_name=SARS.CoV.2.S1+S2                    | feature_id[12].value <= threshold=48812.91796875  |
| node_244: feature_name=SARS.CoV.2.S2                       | feature_id[2].value > threshold=26981.416015625   |
| node_246: feature_name=Flu.B_Phu/.HA1+HA2                  | feature_id[11].value <= threshold=52223.0         |
| node_247: feature_name=Flu.B_Phu/.HA1+HA2                  | feature_id[11].value > threshold=47753.833984375  |
| Class: healthcare workers within 60 days after vaccination |                                                   |

|                                                         |                                                    |
|---------------------------------------------------------|----------------------------------------------------|
|                                                         |                                                    |
| Rules_27                                                | passed counts:11                                   |
| node_0: feature_name=HuIgG_0.10                         | feature_id[1].value <= threshold=19120.166015625   |
| node_1: feature_name=SARS.CoV.2.S1.mFcTag               | feature_id[3].value > threshold=5354.388916015625  |
| node_9: feature_name=a-HuIgG_0.30                       | feature_id[4].value > threshold=33726.833984375    |
| node_55: feature_name=SARS.CoV.2.S1.mFcTag              | feature_id[3].value > threshold=43185.68359375     |
| node_67: feature_name=a-HuIgG_0.03                      | feature_id[8].value > threshold=10858.0            |
| node_83: feature_name=HuIgG_0.03                        | feature_id[5].value > threshold=3796.0             |
| node_103: feature_name=SARS.CoV.2.S1+S2                 | feature_id[12].value <= threshold=49967.91796875   |
| node_104: feature_name=HuIgG_0.10                       | feature_id[1].value > threshold=17143.833984375    |
| Class: healthcare workers 60–180 days after vaccination |                                                    |
|                                                         |                                                    |
| Rules_28                                                | passed counts:10                                   |
| node_0: feature_name=HuIgG_0.10                         | feature_id[1].value > threshold=19120.166015625    |
| node_112: feature_name=a-HuIgG_0.03                     | feature_id[8].value <= threshold=19665.666015625   |
| node_113: feature_name=SARS.CoV.2.S1.mFcTag             | feature_id[3].value > threshold=54010.166015625    |
| node_351: feature_name=SARS.CoV.2.S2                    | feature_id[2].value <= threshold=37075.75          |
| node_352: feature_name=a-HuIgG_0.03                     | feature_id[8].value <= threshold=17721.1669921875  |
| node_353: feature_name=MoIgA_0.10                       | feature_id[13].value <= threshold=536.0            |
| node_354: feature_name=hCoV.HKU1.NP                     | feature_id[10].value <= threshold=7098.5           |
| node_355: feature_name=MoIgA_0.10                       | feature_id[13].value <= threshold=462.0            |
| node_356: feature_name=hCoV.HKU1.NP                     | feature_id[10].value > threshold=2790.583251953125 |
| Class: healthcare workers 60–180 days after vaccination |                                                    |
|                                                         |                                                    |
| Rules_29                                                | passed counts:10                                   |

|                                                            |                                                     |
|------------------------------------------------------------|-----------------------------------------------------|
| node_0: feature_name=HuIgG_0.10                            | feature_id[1].value > threshold=19120.166015625     |
| node_112: feature_name=a-HuIgG_0.03                        | feature_id[8].value <= threshold=19665.666015625    |
| node_113: feature_name=SARS.CoV.2.S1.mFcTag                | feature_id[3].value <= threshold=54010.166015625    |
| node_114: feature_name=SARS.CoV.2.S1+S2                    | feature_id[12].value <= threshold=47258.43359375    |
| node_115: feature_name=SARS.CoV.2.S1.RBD.mFc               | feature_id[0].value > threshold=301.73333740234375  |
| node_131: feature_name=a-HuIgG_0.03                        | feature_id[8].value > threshold=12099.83349609375   |
| node_183: feature_name=Flu.B_Phu/.HA1+HA2                  | feature_id[11].value > threshold=41918.533203125    |
| node_187: feature_name=SARS.CoV.2.Spike.RBD.rFc            | feature_id[9].value <= threshold=27438.341796875    |
| node_188: feature_name=Flu.B_Phu/.HA1+HA2                  | feature_id[11].value > threshold=48840.19921875     |
| node_192: feature_name=MoIgA_0.10                          | feature_id[13].value > threshold=154.99999618530273 |
| Class: healthcare workers within 60 days after vaccination |                                                     |
|                                                            |                                                     |
| Rules_30                                                   | passed counts:10                                    |
| node_0: feature_name=HuIgG_0.10                            | feature_id[1].value <= threshold=19120.166015625    |
| node_1: feature_name=SARS.CoV.2.S1.mFcTag                  | feature_id[3].value > threshold=5354.388916015625   |
| node_9: feature_name=a-HuIgG_0.30                          | feature_id[4].value > threshold=33726.833984375     |
| node_55: feature_name=SARS.CoV.2.S1.mFcTag                 | feature_id[3].value > threshold=43185.68359375      |
| node_67: feature_name=a-HuIgG_0.03                         | feature_id[8].value <= threshold=10858.0            |
| node_68: feature_name=MoIgA_0.10                           | feature_id[13].value > threshold=246.83333587646484 |
| node_76: feature_name=SARS.CoV.2.Spike.RBD.rFc             | feature_id[9].value <= threshold=54060.41796875     |
| node_77: feature_name=a-HuIgG_0.03                         | feature_id[8].value <= threshold=10179.0            |
| Class: healthcare workers within 60 days after vaccination |                                                     |
|                                                            |                                                     |
| Rules_31                                                   | passed counts:10                                    |
| node_0: feature_name=HuIgG_0.10                            | feature_id[1].value <= threshold=19120.166015625    |



|                                                         |                                                     |
|---------------------------------------------------------|-----------------------------------------------------|
| node_1: feature_name=SARS.CoV.2.S1.mFcTag               | feature_id[3].value > threshold=5354.388916015625   |
| node_9: feature_name=a-HuIgG_0.30                       | feature_id[4].value <= threshold=33726.833984375    |
| node_10: feature_name=HuIgG_0.03                        | feature_id[5].value <= threshold=1023.1666564941406 |
| node_11: feature_name=SARS.CoV.2.S1.mFcTag              | feature_id[3].value > threshold=34194.916015625     |
| node_17: feature_name=HuIgG_0.10                        | feature_id[1].value <= threshold=7582.83349609375   |
| Class: healthcare workers 60–180 days after vaccination |                                                     |
|                                                         |                                                     |
| Rules_32                                                | passed counts:9                                     |
| node_0: feature_name=HuIgG_0.10                         | feature_id[1].value > threshold=19120.166015625     |
| node_112: feature_name=a-HuIgG_0.03                     | feature_id[8].value <= threshold=19665.666015625    |
| node_113: feature_name=SARS.CoV.2.S1.mFcTag             | feature_id[3].value > threshold=54010.166015625     |
| node_351: feature_name=SARS.CoV.2.S2                    | feature_id[2].value <= threshold=37075.75           |
| node_352: feature_name=a-HuIgG_0.03                     | feature_id[8].value <= threshold=17721.1669921875   |
| node_353: feature_name=MoIgA_0.10                       | feature_id[13].value > threshold=536.0              |
| node_367: feature_name=HuIgG_0.03                       | feature_id[5].value <= threshold=5634.333251953125  |
| node_368: feature_name=SARS.CoV.2.S1+S2                 | feature_id[12].value <= threshold=52432.75          |
| node_369: feature_name=SARS.CoV.S1.HisTag               | feature_id[6].value <= threshold=17773.60009765625  |
| node_370: feature_name=SARS.CoV.2.S2                    | feature_id[2].value <= threshold=35666.966796875    |
| node_371: feature_name=hCoV.HKU1.NP                     | feature_id[10].value <= threshold=14106.56640625    |
| Class: healthcare workers 60–180 days after vaccination |                                                     |
|                                                         |                                                     |
| Rules_33                                                | passed counts:9                                     |
| node_0: feature_name=HuIgG_0.10                         | feature_id[1].value > threshold=19120.166015625     |
| node_112: feature_name=a-HuIgG_0.03                     | feature_id[8].value <= threshold=19665.666015625    |
| node_113: feature_name=SARS.CoV.2.S1.mFcTag             | feature_id[3].value <= threshold=54010.166015625    |

|                                                            |                                                    |
|------------------------------------------------------------|----------------------------------------------------|
| node_114: feature_name=SARS.CoV.2.S1+S2                    | feature_id[12].value <= threshold=47258.43359375   |
| node_115: feature_name=SARS.CoV.2.S1.RBD.mFc               | feature_id[0].value > threshold=301.73333740234375 |
| node_131: feature_name=a-HuIgG_0.03                        | feature_id[8].value > threshold=12099.83349609375  |
| node_183: feature_name=Flu.B_Phu/.HA1+HA2                  | feature_id[11].value > threshold=41918.533203125   |
| node_187: feature_name=SARS.CoV.2.Spike.RBD.rFc            | feature_id[9].value > threshold=27438.341796875    |
| node_197: feature_name=SARS.CoV.2.S2                       | feature_id[2].value <= threshold=35177.640625      |
| node_198: feature_name=hCoV.HKU1.NP                        | feature_id[10].value > threshold=2645.916748046875 |
| node_210: feature_name=Flu.B_Phu/.HA1+HA2                  | feature_id[11].value <= threshold=54029.166015625  |
| node_211: feature_name=HuIgG_0.10                          | feature_id[1].value > threshold=21359.5            |
| node_213: feature_name=hCoV.NL63.S1_S2                     | feature_id[7].value > threshold=32523.4248046875   |
| node_215: feature_name=HuIgG_0.10                          | feature_id[1].value <= threshold=23274.166015625   |
| Class: healthcare workers within 60 days after vaccination |                                                    |
|                                                            |                                                    |
| Rules_34                                                   | passed counts:9                                    |
| node_0: feature_name=HuIgG_0.10                            | feature_id[1].value <= threshold=19120.166015625   |
| node_1: feature_name=SARS.CoV.2.S1.mFcTag                  | feature_id[3].value > threshold=5354.388916015625  |
| node_9: feature_name=a-HuIgG_0.30                          | feature_id[4].value > threshold=33726.833984375    |
| node_55: feature_name=SARS.CoV.2.S1.mFcTag                 | feature_id[3].value > threshold=43185.68359375     |
| node_67: feature_name=a-HuIgG_0.03                         | feature_id[8].value > threshold=10858.0            |
| node_83: feature_name=HuIgG_0.03                           | feature_id[5].value <= threshold=3796.0            |
| node_84: feature_name=hCoV.NL63.S1_S2                      | feature_id[7].value <= threshold=29814.5           |
| node_85: feature_name=hCoV.NL63.S1_S2                      | feature_id[7].value > threshold=22280.4169921875   |
| node_89: feature_name=Flu.B_Phu/.HA1+HA2                   | feature_id[11].value > threshold=41117.93359375    |
| node_91: feature_name=SARS.CoV.S1.HisTag                   | feature_id[6].value <= threshold=18680.75          |
| Class: healthcare workers 60–180 days after vaccination    |                                                    |

|                                                            |                                                      |
|------------------------------------------------------------|------------------------------------------------------|
|                                                            |                                                      |
| Rules_35                                                   | passed counts:8                                      |
| node_0: feature_name=HuIgG_0.10                            | feature_id[1].value > threshold=19120.166015625      |
| node_112: feature_name=a-HuIgG_0.03                        | feature_id[8].value <= threshold=19665.666015625     |
| node_113: feature_name=SARS.CoV.2.S1.mFcTag                | feature_id[3].value <= threshold=54010.166015625     |
| node_114: feature_name=SARS.CoV.2.S1+S2                    | feature_id[12].value > threshold=47258.43359375      |
| node_240: feature_name=HuIgG_0.03                          | feature_id[5].value > threshold=5455.5               |
| node_266: feature_name=HuIgG_0.10                          | feature_id[1].value <= threshold=24231.0             |
| node_267: feature_name=hCoV.HKU1.NP                        | feature_id[10].value > threshold=2123.0000610351562  |
| node_271: feature_name=SARS.CoV.S1.HisTag                  | feature_id[6].value > threshold=8281.83349609375     |
| node_273: feature_name=Flu.B_Phu/.HA1+HA2                  | feature_id[11].value > threshold=51424.19921875      |
| node_275: feature_name=a-HuIgG_0.30                        | feature_id[4].value > threshold=41169.833984375      |
| node_277: feature_name=a-HuIgG_0.30                        | feature_id[4].value > threshold=42934.333984375      |
| node_279: feature_name=a-HuIgG_0.03                        | feature_id[8].value <= threshold=17284.5             |
| node_280: feature_name=SARS.CoV.2.S1.mFcTag                | feature_id[3].value > threshold=51719.75             |
| Class: healthcare workers within 60 days after vaccination |                                                      |
|                                                            |                                                      |
| Rules_36                                                   | passed counts:8                                      |
| node_0: feature_name=HuIgG_0.10                            | feature_id[1].value > threshold=19120.166015625      |
| node_112: feature_name=a-HuIgG_0.03                        | feature_id[8].value <= threshold=19665.666015625     |
| node_113: feature_name=SARS.CoV.2.S1.mFcTag                | feature_id[3].value <= threshold=54010.166015625     |
| node_114: feature_name=SARS.CoV.2.S1+S2                    | feature_id[12].value > threshold=47258.43359375      |
| node_240: feature_name=HuIgG_0.03                          | feature_id[5].value > threshold=5455.5               |
| node_266: feature_name=HuIgG_0.10                          | feature_id[1].value <= threshold=24231.0             |
| node_267: feature_name=hCoV.HKU1.NP                        | feature_id[10].value <= threshold=2123.0000610351562 |

|                                                            |                                                    |
|------------------------------------------------------------|----------------------------------------------------|
| node_268: feature_name=hCoV.NL63.S1_S2                     | feature_id[7].value > threshold=25279.30859375     |
| Class: healthcare workers within 60 days after vaccination |                                                    |
|                                                            |                                                    |
| Rules_37                                                   | passed counts:8                                    |
| node_0: feature_name=HuIgG_0.10                            | feature_id[1].value > threshold=19120.166015625    |
| node_112: feature_name=a-HuIgG_0.03                        | feature_id[8].value <= threshold=19665.666015625   |
| node_113: feature_name=SARS.CoV.2.S1.mFcTag                | feature_id[3].value <= threshold=54010.166015625   |
| node_114: feature_name=SARS.CoV.2.S1+S2                    | feature_id[12].value <= threshold=47258.43359375   |
| node_115: feature_name=SARS.CoV.2.S1.RBD.mFc               | feature_id[0].value > threshold=301.73333740234375 |
| node_131: feature_name=a-HuIgG_0.03                        | feature_id[8].value > threshold=12099.83349609375  |
| node_183: feature_name=Flu.B_Phu/.HA1+HA2                  | feature_id[11].value > threshold=41918.533203125   |
| node_187: feature_name=SARS.CoV.2.Spike.RBD.rFc            | feature_id[9].value > threshold=27438.341796875    |
| node_197: feature_name=SARS.CoV.2.S2                       | feature_id[2].value > threshold=35177.640625       |
| Class: healthcare workers within 60 days after vaccination |                                                    |
|                                                            |                                                    |
| Rules_38                                                   | passed counts:8                                    |
| node_0: feature_name=HuIgG_0.10                            | feature_id[1].value > threshold=19120.166015625    |
| node_112: feature_name=a-HuIgG_0.03                        | feature_id[8].value <= threshold=19665.666015625   |
| node_113: feature_name=SARS.CoV.2.S1.mFcTag                | feature_id[3].value <= threshold=54010.166015625   |
| node_114: feature_name=SARS.CoV.2.S1+S2                    | feature_id[12].value <= threshold=47258.43359375   |
| node_115: feature_name=SARS.CoV.2.S1.RBD.mFc               | feature_id[0].value > threshold=301.73333740234375 |
| node_131: feature_name=a-HuIgG_0.03                        | feature_id[8].value > threshold=12099.83349609375  |
| node_183: feature_name=Flu.B_Phu/.HA1+HA2                  | feature_id[11].value > threshold=41918.533203125   |
| node_187: feature_name=SARS.CoV.2.Spike.RBD.rFc            | feature_id[9].value > threshold=27438.341796875    |
| node_197: feature_name=SARS.CoV.2.S2                       | feature_id[2].value <= threshold=35177.640625      |

|                                                         |                                                      |
|---------------------------------------------------------|------------------------------------------------------|
| node_198: feature_name=hCoV.HKU1.NP                     | feature_id[10].value <= threshold=2645.916748046875  |
| node_199: feature_name=hCoV.HKU1.NP                     | feature_id[10].value > threshold=666.6666870117188   |
| node_203: feature_name=HuIgG_0.10                       | feature_id[1].value > threshold=24756.5              |
| node_205: feature_name=SARS.CoV.2.S1+S2                 | feature_id[12].value <= threshold=44218.416015625    |
| Class: healthcare workers 60–180 days after vaccination |                                                      |
| Rules_39                                                | passed counts:8                                      |
| node_0: feature_name=HuIgG_0.10                         | feature_id[1].value > threshold=19120.166015625      |
| node_112: feature_name=a-HuIgG_0.03                     | feature_id[8].value <= threshold=19665.666015625     |
| node_113: feature_name=SARS.CoV.2.S1.mFcTag             | feature_id[3].value <= threshold=54010.166015625     |
| node_114: feature_name=SARS.CoV.2.S1+S2                 | feature_id[12].value <= threshold=47258.43359375     |
| node_115: feature_name=SARS.CoV.2.S1.RBD.mFc            | feature_id[0].value > threshold=301.73333740234375   |
| node_131: feature_name=a-HuIgG_0.03                     | feature_id[8].value <= threshold=12099.83349609375   |
| node_132: feature_name=SARS.CoV.2.S2                    | feature_id[2].value > threshold=8858.0751953125      |
| node_134: feature_name=Flu.B_Phu/.HA1+HA2               | feature_id[11].value <= threshold=53839.16796875     |
| node_135: feature_name=hCoV.HKU1.NP                     | feature_id[10].value <= threshold=1010.1666564941406 |
| node_136: feature_name=MoIgA_0.10                       | feature_id[13].value > threshold=497.8333282470703   |
| node_142: feature_name=SARS.CoV.2.S1.mFcTag             | feature_id[3].value <= threshold=50462.283203125     |
| Class: healthcare workers 60–180 days after vaccination |                                                      |
| Rules_40                                                | passed counts:7                                      |
| node_0: feature_name=HuIgG_0.10                         | feature_id[1].value > threshold=19120.166015625      |
| node_112: feature_name=a-HuIgG_0.03                     | feature_id[8].value <= threshold=19665.666015625     |
| node_113: feature_name=SARS.CoV.2.S1.mFcTag             | feature_id[3].value > threshold=54010.166015625      |
| node_351: feature_name=SARS.CoV.2.S2                    | feature_id[2].value > threshold=37075.75             |

|                                                            |                                                   |
|------------------------------------------------------------|---------------------------------------------------|
| node_391: feature_name=SARS.CoV.2.S1.mFcTag                | feature_id[3].value <= threshold=55462.833984375  |
| node_392: feature_name=SARS.CoV.2.S1.mFcTag                | feature_id[3].value <= threshold=55163.634765625  |
| node_393: feature_name=hCoV.HKU1.NP                        | feature_id[10].value > threshold=14561.3330078125 |
| Class: healthcare workers within 60 days after vaccination |                                                   |
|                                                            |                                                   |
| Rules_41                                                   | passed counts:7                                   |
| node_0: feature_name=HuIgG_0.10                            | feature_id[1].value > threshold=19120.166015625   |
| node_112: feature_name=a-HuIgG_0.03                        | feature_id[8].value <= threshold=19665.666015625  |
| node_113: feature_name=SARS.CoV.2.S1.mFcTag                | feature_id[3].value <= threshold=54010.166015625  |
| node_114: feature_name=SARS.CoV.2.S1+S2                    | feature_id[12].value > threshold=47258.43359375   |
| node_240: feature_name=HuIgG_0.03                          | feature_id[5].value > threshold=5455.5            |
| node_266: feature_name=HuIgG_0.10                          | feature_id[1].value > threshold=24231.0           |
| node_284: feature_name=HuIgG_0.03                          | feature_id[5].value > threshold=5469.0            |
| node_286: feature_name=HuIgG_0.10                          | feature_id[1].value <= threshold=30107.666015625  |
| node_287: feature_name=SARS.CoV.2.S1+S2                    | feature_id[12].value > threshold=47536.224609375  |
| node_291: feature_name=SARS.CoV.2.S2                       | feature_id[2].value <= threshold=37653.75         |
| node_292: feature_name=SARS.CoV.2.S2                       | feature_id[2].value <= threshold=36044.29296875   |
| node_293: feature_name=HuIgG_0.03                          | feature_id[5].value > threshold=6329.5            |
| node_301: feature_name=HuIgG_0.03                          | feature_id[5].value <= threshold=6562.16650390625 |
| node_302: feature_name=Flu.B_Phu/.HA1+HA2                  | feature_id[11].value <= threshold=53338.533203125 |
| Class: healthcare workers 60–180 days after vaccination    |                                                   |
|                                                            |                                                   |
| Rules_42                                                   | passed counts:7                                   |
| node_0: feature_name=HuIgG_0.10                            | feature_id[1].value > threshold=19120.166015625   |
| node_112: feature_name=a-HuIgG_0.03                        | feature_id[8].value <= threshold=19665.666015625  |

|                                                            |                                                     |
|------------------------------------------------------------|-----------------------------------------------------|
| node_113: feature_name=SARS.CoV.2.S1.mFcTag                | feature_id[3].value <= threshold=54010.166015625    |
| node_114: feature_name=SARS.CoV.2.S1+S2                    | feature_id[12].value <= threshold=47258.43359375    |
| node_115: feature_name=SARS.CoV.2.S1.RBD.mFc               | feature_id[0].value > threshold=301.73333740234375  |
| node_131: feature_name=a-HuIgG_0.03                        | feature_id[8].value <= threshold=12099.83349609375  |
| node_132: feature_name=SARS.CoV.2.S2                       | feature_id[2].value > threshold=8858.0751953125     |
| node_134: feature_name=Flu.B_Phu/.HA1+HA2                  | feature_id[11].value <= threshold=53839.16796875    |
| node_135: feature_name=hCoV.HKU1.NP                        | feature_id[10].value > threshold=1010.1666564941406 |
| node_145: feature_name=hCoV.HKU1.NP                        | feature_id[10].value <= threshold=15374.16650390625 |
| node_146: feature_name=SARS.CoV.2.S1.mFcTag                | feature_id[3].value <= threshold=50683.0            |
| node_147: feature_name=SARS.CoV.2.Spike.RBD.rFc            | feature_id[9].value <= threshold=45822.583984375    |
| node_148: feature_name=SARS.CoV.2.S2                       | feature_id[2].value > threshold=10212.125           |
| node_154: feature_name=Flu.B_Phu/.HA1+HA2                  | feature_id[11].value > threshold=49488.1171875      |
| node_162: feature_name=MoIgA_0.10                          | feature_id[13].value > threshold=2877.1666259765625 |
| node_164: feature_name=SARS.CoV.2.Spike.RBD.rFc            | feature_id[9].value <= threshold=38138.451171875    |
| Class: healthcare workers within 60 days after vaccination |                                                     |
|                                                            |                                                     |
| Rules_43                                                   | passed counts:7                                     |
| node_0: feature_name=HuIgG_0.10                            | feature_id[1].value > threshold=19120.166015625     |
| node_112: feature_name=a-HuIgG_0.03                        | feature_id[8].value <= threshold=19665.666015625    |
| node_113: feature_name=SARS.CoV.2.S1.mFcTag                | feature_id[3].value <= threshold=54010.166015625    |
| node_114: feature_name=SARS.CoV.2.S1+S2                    | feature_id[12].value <= threshold=47258.43359375    |
| node_115: feature_name=SARS.CoV.2.S1.RBD.mFc               | feature_id[0].value > threshold=301.73333740234375  |
| node_131: feature_name=a-HuIgG_0.03                        | feature_id[8].value <= threshold=12099.83349609375  |
| node_132: feature_name=SARS.CoV.2.S2                       | feature_id[2].value > threshold=8858.0751953125     |
| node_134: feature_name=Flu.B_Phu/.HA1+HA2                  | feature_id[11].value <= threshold=53839.16796875    |

|                                                            |                                                      |
|------------------------------------------------------------|------------------------------------------------------|
| node_135: feature_name=hCoV.HKU1.NP                        | feature_id[10].value <= threshold=1010.1666564941406 |
| node_136: feature_name=MoIgA_0.10                          | feature_id[13].value <= threshold=497.8333282470703  |
| node_137: feature_name=MoIgA_0.10                          | feature_id[13].value > threshold=153.0               |
| Class: healthcare workers within 60 days after vaccination |                                                      |
|                                                            |                                                      |
| Rules_44                                                   | passed counts:6                                      |
| node_0: feature_name=HuIgG_0.10                            | feature_id[1].value > threshold=19120.166015625      |
| node_112: feature_name=a-HuIgG_0.03                        | feature_id[8].value > threshold=19665.666015625      |
| node_428: feature_name=SARS.CoV.2.Spike.RBD.rFc            | feature_id[9].value <= threshold=55147.1484375       |
| node_429: feature_name=a-HuIgG_0.30                        | feature_id[4].value <= threshold=51289.166015625     |
| node_430: feature_name=Flu.B_Phu/.HA1+HA2                  | feature_id[11].value > threshold=48173.93359375      |
| node_434: feature_name=a-HuIgG_0.30                        | feature_id[4].value > threshold=47010.66796875       |
| Class: healthcare workers 60–180 days after vaccination    |                                                      |
|                                                            |                                                      |
| Rules_45                                                   | passed counts:6                                      |
| node_0: feature_name=HuIgG_0.10                            | feature_id[1].value > threshold=19120.166015625      |
| node_112: feature_name=a-HuIgG_0.03                        | feature_id[8].value <= threshold=19665.666015625     |
| node_113: feature_name=SARS.CoV.2.S1.mFcTag                | feature_id[3].value > threshold=54010.166015625      |
| node_351: feature_name=SARS.CoV.2.S2                       | feature_id[2].value > threshold=37075.75             |
| node_391: feature_name=SARS.CoV.2.S1.mFcTag                | feature_id[3].value > threshold=55462.833984375      |
| node_425: feature_name=hCoV.NL63.S1_S2                     | feature_id[7].value > threshold=29337.0              |
| Class: healthcare workers 60–180 days after vaccination    |                                                      |
|                                                            |                                                      |
| Rules_46                                                   | passed counts:6                                      |
| node_0: feature_name=HuIgG_0.10                            | feature_id[1].value > threshold=19120.166015625      |



|                                                            |                                                      |
|------------------------------------------------------------|------------------------------------------------------|
| node_112: feature_name=a-HuIgG_0.03                        | feature_id[8].value <= threshold=19665.666015625     |
| node_113: feature_name=SARS.CoV.2.S1.mFcTag                | feature_id[3].value > threshold=54010.166015625      |
| node_351: feature_name=SARS.CoV.2.S2                       | feature_id[2].value > threshold=37075.75             |
| node_391: feature_name=SARS.CoV.2.S1.mFcTag                | feature_id[3].value <= threshold=55462.833984375     |
| node_392: feature_name=SARS.CoV.2.S1.mFcTag                | feature_id[3].value <= threshold=55163.634765625     |
| node_393: feature_name=hCoV.HKU1.NP                        | feature_id[10].value <= threshold=14561.3330078125   |
| node_394: feature_name=hCoV.HKU1.NP                        | feature_id[10].value <= threshold=6453.333251953125  |
| node_395: feature_name=hCoV.HKU1.NP                        | feature_id[10].value <= threshold=1990.1666259765625 |
| node_396: feature_name=SARS.CoV.S1.HisTag                  | feature_id[6].value > threshold=12607.2998046875     |
| node_398: feature_name=a-HuIgG_0.03                        | feature_id[8].value <= threshold=15419.83349609375   |
| node_399: feature_name=SARS.CoV.2.S1.mFcTag                | feature_id[3].value <= threshold=55018.716796875     |
| Class: healthcare workers 60–180 days after vaccination    |                                                      |
|                                                            |                                                      |
| Rules_47                                                   | passed counts:6                                      |
| node_0: feature_name=HuIgG_0.10                            | feature_id[1].value > threshold=19120.166015625      |
| node_112: feature_name=a-HuIgG_0.03                        | feature_id[8].value <= threshold=19665.666015625     |
| node_113: feature_name=SARS.CoV.2.S1.mFcTag                | feature_id[3].value > threshold=54010.166015625      |
| node_351: feature_name=SARS.CoV.2.S2                       | feature_id[2].value <= threshold=37075.75            |
| node_352: feature_name=a-HuIgG_0.03                        | feature_id[8].value <= threshold=17721.1669921875    |
| node_353: feature_name=MoIgA_0.10                          | feature_id[13].value <= threshold=536.0              |
| node_354: feature_name=hCoV.HKU1.NP                        | feature_id[10].value > threshold=7098.5              |
| Class: healthcare workers within 60 days after vaccination |                                                      |
|                                                            |                                                      |
| Rules_48                                                   | passed counts:6                                      |
| node_0: feature_name=HuIgG_0.10                            | feature_id[1].value > threshold=19120.166015625      |

|                                                            |                                                     |
|------------------------------------------------------------|-----------------------------------------------------|
| node_112: feature_name=a-HuIgG_0.03                        | feature_id[8].value <= threshold=19665.666015625    |
| node_113: feature_name=SARS.CoV.2.S1.mFcTag                | feature_id[3].value > threshold=54010.166015625     |
| node_351: feature_name=SARS.CoV.2.S2                       | feature_id[2].value <= threshold=37075.75           |
| node_352: feature_name=a-HuIgG_0.03                        | feature_id[8].value <= threshold=17721.1669921875   |
| node_353: feature_name=MoIgA_0.10                          | feature_id[13].value <= threshold=536.0             |
| node_354: feature_name=hCoV.HKU1.NP                        | feature_id[10].value <= threshold=7098.5            |
| node_355: feature_name=MoIgA_0.10                          | feature_id[13].value <= threshold=462.0             |
| node_356: feature_name=hCoV.HKU1.NP                        | feature_id[10].value <= threshold=2790.583251953125 |
| node_357: feature_name=hCoV.NL63.S1_S2                     | feature_id[7].value > threshold=36099.0             |
| node_359: feature_name=hCoV.HKU1.NP                        | feature_id[10].value > threshold=1348.6666870117188 |
| Class: healthcare workers within 60 days after vaccination |                                                     |
|                                                            |                                                     |
| Rules_49                                                   | passed counts:6                                     |
| node_0: feature_name=HuIgG_0.10                            | feature_id[1].value > threshold=19120.166015625     |
| node_112: feature_name=a-HuIgG_0.03                        | feature_id[8].value <= threshold=19665.666015625    |
| node_113: feature_name=SARS.CoV.2.S1.mFcTag                | feature_id[3].value <= threshold=54010.166015625    |
| node_114: feature_name=SARS.CoV.2.S1+S2                    | feature_id[12].value > threshold=47258.43359375     |
| node_240: feature_name=HuIgG_0.03                          | feature_id[5].value > threshold=5455.5              |
| node_266: feature_name=HuIgG_0.10                          | feature_id[1].value > threshold=24231.0             |
| node_284: feature_name=HuIgG_0.03                          | feature_id[5].value > threshold=5469.0              |
| node_286: feature_name=HuIgG_0.10                          | feature_id[1].value <= threshold=30107.666015625    |
| node_287: feature_name=SARS.CoV.2.S1+S2                    | feature_id[12].value > threshold=47536.224609375    |
| node_291: feature_name=SARS.CoV.2.S2                       | feature_id[2].value > threshold=37653.75            |
| node_329: feature_name=SARS.CoV.2.S1.mFcTag                | feature_id[3].value > threshold=53346.333984375     |
| node_345: feature_name=SARS.CoV.2.S1.mFcTag                | feature_id[3].value > threshold=53555.333984375     |

|                                                            |                                                     |
|------------------------------------------------------------|-----------------------------------------------------|
| Class: healthcare workers within 60 days after vaccination |                                                     |
|                                                            |                                                     |
| Rules_50                                                   | passed counts:6                                     |
| node_0: feature_name=HuIgG_0.10                            | feature_id[1].value > threshold=19120.166015625     |
| node_112: feature_name=a-HuIgG_0.03                        | feature_id[8].value <= threshold=19665.666015625    |
| node_113: feature_name=SARS.CoV.2.S1.mFcTag                | feature_id[3].value <= threshold=54010.166015625    |
| node_114: feature_name=SARS.CoV.2.S1+S2                    | feature_id[12].value > threshold=47258.43359375     |
| node_240: feature_name=HuIgG_0.03                          | feature_id[5].value > threshold=5455.5              |
| node_266: feature_name=HuIgG_0.10                          | feature_id[1].value <= threshold=24231.0            |
| node_267: feature_name=hCoV.HKU1.NP                        | feature_id[10].value > threshold=2123.0000610351562 |
| node_271: feature_name=SARS.CoV.S1.HisTag                  | feature_id[6].value > threshold=8281.83349609375    |
| node_273: feature_name=Flu.B_Phu/.HA1+HA2                  | feature_id[11].value > threshold=51424.19921875     |
| node_275: feature_name=a-HuIgG_0.30                        | feature_id[4].value <= threshold=41169.833984375    |
| Class: healthcare workers within 60 days after vaccination |                                                     |
|                                                            |                                                     |
| Rules_51                                                   | passed counts:6                                     |
| node_0: feature_name=HuIgG_0.10                            | feature_id[1].value > threshold=19120.166015625     |
| node_112: feature_name=a-HuIgG_0.03                        | feature_id[8].value <= threshold=19665.666015625    |
| node_113: feature_name=SARS.CoV.2.S1.mFcTag                | feature_id[3].value <= threshold=54010.166015625    |
| node_114: feature_name=SARS.CoV.2.S1+S2                    | feature_id[12].value > threshold=47258.43359375     |
| node_240: feature_name=HuIgG_0.03                          | feature_id[5].value > threshold=5455.5              |
| node_266: feature_name=HuIgG_0.10                          | feature_id[1].value <= threshold=24231.0            |
| node_267: feature_name=hCoV.HKU1.NP                        | feature_id[10].value > threshold=2123.0000610351562 |
| node_271: feature_name=SARS.CoV.S1.HisTag                  | feature_id[6].value <= threshold=8281.83349609375   |
| Class: healthcare workers 60–180 days after vaccination    |                                                     |

|                                                            |                                                    |
|------------------------------------------------------------|----------------------------------------------------|
|                                                            |                                                    |
| Rules_52                                                   | passed counts:6                                    |
| node_0: feature_name=HuIgG_0.10                            | feature_id[1].value > threshold=19120.166015625    |
| node_112: feature_name=a-HuIgG_0.03                        | feature_id[8].value <= threshold=19665.666015625   |
| node_113: feature_name=SARS.CoV.2.S1.mFcTag                | feature_id[3].value <= threshold=54010.166015625   |
| node_114: feature_name=SARS.CoV.2.S1+S2                    | feature_id[12].value > threshold=47258.43359375    |
| node_240: feature_name=HuIgG_0.03                          | feature_id[5].value <= threshold=5455.5            |
| node_241: feature_name=SARS.CoV.S1.HisTag                  | feature_id[6].value > threshold=745.7222290039062  |
| node_243: feature_name=SARS.CoV.2.S1+S2                    | feature_id[12].value > threshold=48812.91796875    |
| node_253: feature_name=SARS.CoV.S1.HisTag                  | feature_id[6].value > threshold=2772.300048828125  |
| node_257: feature_name=HuIgG_0.10                          | feature_id[1].value <= threshold=26991.8330078125  |
| node_258: feature_name=SARS.CoV.2.S1.RBD.mFc               | feature_id[0].value <= threshold=41406.666015625   |
| node_259: feature_name=SARS.CoV.2.S1.RBD.mFc               | feature_id[0].value <= threshold=40954.3828125     |
| Class: healthcare workers within 60 days after vaccination |                                                    |
|                                                            |                                                    |
| Rules_53                                                   | passed counts:6                                    |
| node_0: feature_name=HuIgG_0.10                            | feature_id[1].value > threshold=19120.166015625    |
| node_112: feature_name=a-HuIgG_0.03                        | feature_id[8].value <= threshold=19665.666015625   |
| node_113: feature_name=SARS.CoV.2.S1.mFcTag                | feature_id[3].value <= threshold=54010.166015625   |
| node_114: feature_name=SARS.CoV.2.S1+S2                    | feature_id[12].value <= threshold=47258.43359375   |
| node_115: feature_name=SARS.CoV.2.S1.RBD.mFc               | feature_id[0].value > threshold=301.73333740234375 |
| node_131: feature_name=a-HuIgG_0.03                        | feature_id[8].value > threshold=12099.83349609375  |
| node_183: feature_name=Flu.B_Phu/.HA1+HA2                  | feature_id[11].value > threshold=41918.533203125   |
| node_187: feature_name=SARS.CoV.2.Spike.RBD.rFc            | feature_id[9].value > threshold=27438.341796875    |
| node_197: feature_name=SARS.CoV.2.S2                       | feature_id[2].value <= threshold=35177.640625      |

|                                                         |                                                     |
|---------------------------------------------------------|-----------------------------------------------------|
| node_198: feature_name=hCoV.HKU1.NP                     | feature_id[10].value > threshold=2645.916748046875  |
| node_210: feature_name=Flu.B_Phu/.HA1+HA2               | feature_id[11].value <= threshold=54029.166015625   |
| node_211: feature_name=HuIgG_0.10                       | feature_id[1].value > threshold=21359.5             |
| node_213: feature_name=hCoV.NL63.S1_S2                  | feature_id[7].value > threshold=32523.4248046875    |
| node_215: feature_name=HuIgG_0.10                       | feature_id[1].value > threshold=23274.166015625     |
| node_217: feature_name=HuIgG_0.10                       | feature_id[1].value > threshold=25231.1669921875    |
| node_227: feature_name=SARS.CoV.2.S2                    | feature_id[2].value <= threshold=18038.125          |
| node_228: feature_name=hCoV.HKU1.NP                     | feature_id[10].value <= threshold=11390.08349609375 |
| Class: healthcare workers 60–180 days after vaccination |                                                     |
|                                                         |                                                     |
| Rules_54                                                | passed counts:6                                     |
| node_0: feature_name=HuIgG_0.10                         | feature_id[1].value > threshold=19120.166015625     |
| node_112: feature_name=a-HuIgG_0.03                     | feature_id[8].value <= threshold=19665.666015625    |
| node_113: feature_name=SARS.CoV.2.S1.mFcTag             | feature_id[3].value <= threshold=54010.166015625    |
| node_114: feature_name=SARS.CoV.2.S1+S2                 | feature_id[12].value <= threshold=47258.43359375    |
| node_115: feature_name=SARS.CoV.2.S1.RBD.mFc            | feature_id[0].value > threshold=301.73333740234375  |
| node_131: feature_name=a-HuIgG_0.03                     | feature_id[8].value > threshold=12099.83349609375   |
| node_183: feature_name=Flu.B_Phu/.HA1+HA2               | feature_id[11].value > threshold=41918.533203125    |
| node_187: feature_name=SARS.CoV.2.Spike.RBD.rFc         | feature_id[9].value > threshold=27438.341796875     |
| node_197: feature_name=SARS.CoV.2.S2                    | feature_id[2].value <= threshold=35177.640625       |
| node_198: feature_name=hCoV.HKU1.NP                     | feature_id[10].value > threshold=2645.916748046875  |
| node_210: feature_name=Flu.B_Phu/.HA1+HA2               | feature_id[11].value <= threshold=54029.166015625   |
| node_211: feature_name=HuIgG_0.10                       | feature_id[1].value <= threshold=21359.5            |
| Class: healthcare workers 60–180 days after vaccination |                                                     |
|                                                         |                                                     |

|                                                           |                                                    |
|-----------------------------------------------------------|----------------------------------------------------|
| Rules_55                                                  | passed counts:6                                    |
| node_0: feature_name=HuIgG_0.10                           | feature_id[1].value > threshold=19120.166015625    |
| node_112: feature_name=a-HuIgG_0.03                       | feature_id[8].value <= threshold=19665.666015625   |
| node_113: feature_name=SARS.CoV.2.S1.mFcTag               | feature_id[3].value <= threshold=54010.166015625   |
| node_114: feature_name=SARS.CoV.2.S1+S2                   | feature_id[12].value <= threshold=47258.43359375   |
| node_115: feature_name=SARS.CoV.2.S1.RBD.mFc              | feature_id[0].value > threshold=301.73333740234375 |
| node_131: feature_name=a-HuIgG_0.03                       | feature_id[8].value > threshold=12099.83349609375  |
| node_183: feature_name=Flu.B_Phu/.HA1+HA2                 | feature_id[11].value <= threshold=41918.533203125  |
| node_184: feature_name=a-HuIgG_0.03                       | feature_id[8].value > threshold=14683.6669921875   |
| Class: healthcare workers over 180 days after vaccination |                                                    |
|                                                           |                                                    |
| Rules_56                                                  | passed counts:6                                    |
| node_0: feature_name=HuIgG_0.10                           | feature_id[1].value > threshold=19120.166015625    |
| node_112: feature_name=a-HuIgG_0.03                       | feature_id[8].value <= threshold=19665.666015625   |
| node_113: feature_name=SARS.CoV.2.S1.mFcTag               | feature_id[3].value <= threshold=54010.166015625   |
| node_114: feature_name=SARS.CoV.2.S1+S2                   | feature_id[12].value <= threshold=47258.43359375   |
| node_115: feature_name=SARS.CoV.2.S1.RBD.mFc              | feature_id[0].value > threshold=301.73333740234375 |
| node_131: feature_name=a-HuIgG_0.03                       | feature_id[8].value <= threshold=12099.83349609375 |
| node_132: feature_name=SARS.CoV.2.S2                      | feature_id[2].value > threshold=8858.0751953125    |
| node_134: feature_name=Flu.B_Phu/.HA1+HA2                 | feature_id[11].value > threshold=53839.16796875    |
| node_180: feature_name=a-HuIgG_0.30                       | feature_id[4].value > threshold=40436.333984375    |
| Class: healthcare workers 60–180 days after vaccination   |                                                    |
|                                                           |                                                    |
| Rules_57                                                  | passed counts:6                                    |
| node_0: feature_name=HuIgG_0.10                           | feature_id[1].value <= threshold=19120.166015625   |

|                                                            |                                                      |
|------------------------------------------------------------|------------------------------------------------------|
| node_1: feature_name=SARS.CoV.2.S1.mFcTag                  | feature_id[3].value > threshold=5354.388916015625    |
| node_9: feature_name=a-HuIgG_0.30                          | feature_id[4].value > threshold=33726.833984375      |
| node_55: feature_name=SARS.CoV.2.S1.mFcTag                 | feature_id[3].value > threshold=43185.68359375       |
| node_67: feature_name=a-HuIgG_0.03                         | feature_id[8].value <= threshold=10858.0             |
| node_68: feature_name=MoIgA_0.10                           | feature_id[13].value <= threshold=246.83333587646484 |
| node_69: feature_name=hCoV.HKU1.NP                         | feature_id[10].value > threshold=1960.7500610351562  |
| node_73: feature_name=hCoV.NL63.S1_S2                      | feature_id[7].value > threshold=25846.875            |
| Class: healthcare workers 60–180 days after vaccination    |                                                      |
|                                                            |                                                      |
| Rules_58                                                   | passed counts:5                                      |
| node_0: feature_name=HuIgG_0.10                            | feature_id[1].value > threshold=19120.166015625      |
| node_112: feature_name=a-HuIgG_0.03                        | feature_id[8].value <= threshold=19665.666015625     |
| node_113: feature_name=SARS.CoV.2.S1.mFcTag                | feature_id[3].value > threshold=54010.166015625      |
| node_351: feature_name=SARS.CoV.2.S2                       | feature_id[2].value <= threshold=37075.75            |
| node_352: feature_name=a-HuIgG_0.03                        | feature_id[8].value <= threshold=17721.1669921875    |
| node_353: feature_name=MoIgA_0.10                          | feature_id[13].value > threshold=536.0               |
| node_367: feature_name=HuIgG_0.03                          | feature_id[5].value <= threshold=5634.333251953125   |
| node_368: feature_name=SARS.CoV.2.S1+S2                    | feature_id[12].value > threshold=52432.75            |
| node_378: feature_name=a-HuIgG_0.30                        | feature_id[4].value <= threshold=49923.66796875      |
| Class: healthcare workers within 60 days after vaccination |                                                      |
|                                                            |                                                      |
| Rules_59                                                   | passed counts:5                                      |
| node_0: feature_name=HuIgG_0.10                            | feature_id[1].value > threshold=19120.166015625      |
| node_112: feature_name=a-HuIgG_0.03                        | feature_id[8].value <= threshold=19665.666015625     |
| node_113: feature_name=SARS.CoV.2.S1.mFcTag                | feature_id[3].value > threshold=54010.166015625      |

|                                                         |                                                     |
|---------------------------------------------------------|-----------------------------------------------------|
| node_351: feature_name=SARS.CoV.2.S2                    | feature_id[2].value <= threshold=37075.75           |
| node_352: feature_name=a-HuIgG_0.03                     | feature_id[8].value <= threshold=17721.1669921875   |
| node_353: feature_name=MoIgA_0.10                       | feature_id[13].value <= threshold=536.0             |
| node_354: feature_name=hCoV.HKU1.NP                     | feature_id[10].value <= threshold=7098.5            |
| node_355: feature_name=MoIgA_0.10                       | feature_id[13].value <= threshold=462.0             |
| node_356: feature_name=hCoV.HKU1.NP                     | feature_id[10].value <= threshold=2790.583251953125 |
| node_357: feature_name=hCoV.NL63.S1_S2                  | feature_id[7].value <= threshold=36099.0            |
| Class: healthcare workers 60–180 days after vaccination |                                                     |
|                                                         |                                                     |
| Rules_60                                                | passed counts:5                                     |
| node_0: feature_name=HuIgG_0.10                         | feature_id[1].value > threshold=19120.166015625     |
| node_112: feature_name=a-HuIgG_0.03                     | feature_id[8].value <= threshold=19665.666015625    |
| node_113: feature_name=SARS.CoV.2.S1.mFcTag             | feature_id[3].value <= threshold=54010.166015625    |
| node_114: feature_name=SARS.CoV.2.S1+S2                 | feature_id[12].value > threshold=47258.43359375     |
| node_240: feature_name=HuIgG_0.03                       | feature_id[5].value > threshold=5455.5              |
| node_266: feature_name=HuIgG_0.10                       | feature_id[1].value <= threshold=24231.0            |
| node_267: feature_name=hCoV.HKU1.NP                     | feature_id[10].value > threshold=2123.0000610351562 |
| node_271: feature_name=SARS.CoV.S1.HisTag               | feature_id[6].value > threshold=8281.83349609375    |
| node_273: feature_name=Flu.B_Phu/.HA1+HA2               | feature_id[11].value > threshold=51424.19921875     |
| node_275: feature_name=a-HuIgG_0.30                     | feature_id[4].value > threshold=41169.833984375     |
| node_277: feature_name=a-HuIgG_0.30                     | feature_id[4].value <= threshold=42934.333984375    |
| Class: healthcare workers 60–180 days after vaccination |                                                     |
|                                                         |                                                     |
| Rules_61                                                | passed counts:5                                     |
| node_0: feature_name=HuIgG_0.10                         | feature_id[1].value > threshold=19120.166015625     |



|                                                         |                                                     |
|---------------------------------------------------------|-----------------------------------------------------|
| node_112: feature_name=a-HuIgG_0.03                     | feature_id[8].value <= threshold=19665.666015625    |
| node_113: feature_name=SARS.CoV.2.S1.mFcTag             | feature_id[3].value <= threshold=54010.166015625    |
| node_114: feature_name=SARS.CoV.2.S1+S2                 | feature_id[12].value > threshold=47258.43359375     |
| node_240: feature_name=HuIgG_0.03                       | feature_id[5].value <= threshold=5455.5             |
| node_241: feature_name=SARS.CoV.S1.HisTag               | feature_id[6].value > threshold=745.7222290039062   |
| node_243: feature_name=SARS.CoV.2.S1+S2                 | feature_id[12].value <= threshold=48812.91796875    |
| node_244: feature_name=SARS.CoV.2.S2                    | feature_id[2].value > threshold=26981.416015625     |
| node_246: feature_name=Flu.B_Phu/.HA1+HA2               | feature_id[11].value > threshold=52223.0            |
| node_250: feature_name=SARS.CoV.2.S1.mFcTag             | feature_id[3].value > threshold=49570.5             |
| Class: healthcare workers 60–180 days after vaccination |                                                     |
|                                                         |                                                     |
| Rules_62                                                | passed counts:5                                     |
| node_0: feature_name=HuIgG_0.10                         | feature_id[1].value > threshold=19120.166015625     |
| node_112: feature_name=a-HuIgG_0.03                     | feature_id[8].value <= threshold=19665.666015625    |
| node_113: feature_name=SARS.CoV.2.S1.mFcTag             | feature_id[3].value <= threshold=54010.166015625    |
| node_114: feature_name=SARS.CoV.2.S1+S2                 | feature_id[12].value <= threshold=47258.43359375    |
| node_115: feature_name=SARS.CoV.2.S1.RBD.mFc            | feature_id[0].value > threshold=301.73333740234375  |
| node_131: feature_name=a-HuIgG_0.03                     | feature_id[8].value > threshold=12099.83349609375   |
| node_183: feature_name=Flu.B_Phu/.HA1+HA2               | feature_id[11].value > threshold=41918.533203125    |
| node_187: feature_name=SARS.CoV.2.Spike.RBD.rFc         | feature_id[9].value > threshold=27438.341796875     |
| node_197: feature_name=SARS.CoV.2.S2                    | feature_id[2].value <= threshold=35177.640625       |
| node_198: feature_name=hCoV.HKU1.NP                     | feature_id[10].value <= threshold=2645.916748046875 |
| node_199: feature_name=hCoV.HKU1.NP                     | feature_id[10].value > threshold=666.6666870117188  |
| node_203: feature_name=HuIgG_0.10                       | feature_id[1].value > threshold=24756.5             |
| node_205: feature_name=SARS.CoV.2.S1+S2                 | feature_id[12].value > threshold=44218.416015625    |

|                                                            |                                                     |
|------------------------------------------------------------|-----------------------------------------------------|
| node_207: feature_name=SARS.CoV.2.Spike.RBD.rFc            | feature_id[9].value <= threshold=46720.900390625    |
| Class: healthcare workers within 60 days after vaccination |                                                     |
|                                                            |                                                     |
| Rules_63                                                   | passed counts:5                                     |
| node_0: feature_name=HuIgG_0.10                            | feature_id[1].value > threshold=19120.166015625     |
| node_112: feature_name=a-HuIgG_0.03                        | feature_id[8].value <= threshold=19665.666015625    |
| node_113: feature_name=SARS.CoV.2.S1.mFcTag                | feature_id[3].value <= threshold=54010.166015625    |
| node_114: feature_name=SARS.CoV.2.S1+S2                    | feature_id[12].value <= threshold=47258.43359375    |
| node_115: feature_name=SARS.CoV.2.S1.RBD.mFc               | feature_id[0].value > threshold=301.73333740234375  |
| node_131: feature_name=a-HuIgG_0.03                        | feature_id[8].value <= threshold=12099.83349609375  |
| node_132: feature_name=SARS.CoV.2.S2                       | feature_id[2].value <= threshold=8858.0751953125    |
| Class: healthcare workers 60–180 days after vaccination    |                                                     |
|                                                            |                                                     |
| Rules_64                                                   | passed counts:5                                     |
| node_0: feature_name=HuIgG_0.10                            | feature_id[1].value <= threshold=19120.166015625    |
| node_1: feature_name=SARS.CoV.2.S1.mFcTag                  | feature_id[3].value > threshold=5354.388916015625   |
| node_9: feature_name=a-HuIgG_0.30                          | feature_id[4].value <= threshold=33726.833984375    |
| node_10: feature_name=HuIgG_0.03                           | feature_id[5].value <= threshold=1023.1666564941406 |
| node_11: feature_name=SARS.CoV.2.S1.mFcTag                 | feature_id[3].value > threshold=34194.916015625     |
| node_17: feature_name=HuIgG_0.10                           | feature_id[1].value > threshold=7582.83349609375    |
| Class: healthcare workers over 180 days after vaccination  |                                                     |
|                                                            |                                                     |
| Rules_65                                                   | passed counts:4                                     |
| node_0: feature_name=HuIgG_0.10                            | feature_id[1].value > threshold=19120.166015625     |
| node_112: feature_name=a-HuIgG_0.03                        | feature_id[8].value > threshold=19665.666015625     |

|                                                         |                                                  |
|---------------------------------------------------------|--------------------------------------------------|
| node_428: feature_name=SARS.CoV.2.Spike.RBD.rFc         | feature_id[9].value > threshold=55147.1484375    |
| Class: healthcare workers 60–180 days after vaccination |                                                  |
|                                                         |                                                  |
| Rules_66                                                | passed counts:4                                  |
| node_0: feature_name=HuIgG_0.10                         | feature_id[1].value > threshold=19120.166015625  |
| node_112: feature_name=a-HuIgG_0.03                     | feature_id[8].value > threshold=19665.666015625  |
| node_428: feature_name=SARS.CoV.2.Spike.RBD.rFc         | feature_id[9].value <= threshold=55147.1484375   |
| node_429: feature_name=a-HuIgG_0.30                     | feature_id[4].value > threshold=51289.166015625  |
| node_437: feature_name=HuIgG_0.10                       | feature_id[1].value > threshold=25959.0          |
| node_441: feature_name=hCoV.NL63.S1_S2                  | feature_id[7].value <= threshold=43930.5234375   |
| node_442: feature_name=a-HuIgG_0.03                     | feature_id[8].value > threshold=23272.1669921875 |
| Class: healthcare workers 60–180 days after vaccination |                                                  |
|                                                         |                                                  |
| Rules_67                                                | passed counts:4                                  |
| node_0: feature_name=HuIgG_0.10                         | feature_id[1].value > threshold=19120.166015625  |
| node_112: feature_name=a-HuIgG_0.03                     | feature_id[8].value <= threshold=19665.666015625 |
| node_113: feature_name=SARS.CoV.2.S1.mFcTag             | feature_id[3].value <= threshold=54010.166015625 |
| node_114: feature_name=SARS.CoV.2.S1+S2                 | feature_id[12].value > threshold=47258.43359375  |
| node_240: feature_name=HuIgG_0.03                       | feature_id[5].value > threshold=5455.5           |
| node_266: feature_name=HuIgG_0.10                       | feature_id[1].value > threshold=24231.0          |
| node_284: feature_name=HuIgG_0.03                       | feature_id[5].value > threshold=5469.0           |
| node_286: feature_name=HuIgG_0.10                       | feature_id[1].value <= threshold=30107.666015625 |
| node_287: feature_name=SARS.CoV.2.S1+S2                 | feature_id[12].value > threshold=47536.224609375 |
| node_291: feature_name=SARS.CoV.2.S2                    | feature_id[2].value > threshold=37653.75         |
| node_329: feature_name=SARS.CoV.2.S1.mFcTag             | feature_id[3].value > threshold=53346.333984375  |

|                                                            |                                                  |
|------------------------------------------------------------|--------------------------------------------------|
| node_345: feature_name=SARS.CoV.2.S1.mFcTag                | feature_id[3].value <= threshold=53555.333984375 |
| node_346: feature_name=SARS.CoV.2.S2                       | feature_id[2].value > threshold=45480.583984375  |
| Class: healthcare workers 60–180 days after vaccination    |                                                  |
|                                                            |                                                  |
| Rules_68                                                   | passed counts:4                                  |
| node_0: feature_name=HuIgG_0.10                            | feature_id[1].value > threshold=19120.166015625  |
| node_112: feature_name=a-HuIgG_0.03                        | feature_id[8].value <= threshold=19665.666015625 |
| node_113: feature_name=SARS.CoV.2.S1.mFcTag                | feature_id[3].value <= threshold=54010.166015625 |
| node_114: feature_name=SARS.CoV.2.S1+S2                    | feature_id[12].value > threshold=47258.43359375  |
| node_240: feature_name=HuIgG_0.03                          | feature_id[5].value > threshold=5455.5           |
| node_266: feature_name=HuIgG_0.10                          | feature_id[1].value > threshold=24231.0          |
| node_284: feature_name=HuIgG_0.03                          | feature_id[5].value > threshold=5469.0           |
| node_286: feature_name=HuIgG_0.10                          | feature_id[1].value <= threshold=30107.666015625 |
| node_287: feature_name=SARS.CoV.2.S1+S2                    | feature_id[12].value > threshold=47536.224609375 |
| node_291: feature_name=SARS.CoV.2.S2                       | feature_id[2].value > threshold=37653.75         |
| node_329: feature_name=SARS.CoV.2.S1.mFcTag                | feature_id[3].value <= threshold=53346.333984375 |
| node_330: feature_name=Flu.B_Phu/.HA1+HA2                  | feature_id[11].value > threshold=53733.0         |
| node_340: feature_name=SARS.CoV.2.S1+S2                    | feature_id[12].value > threshold=51770.29296875  |
| Class: healthcare workers within 60 days after vaccination |                                                  |
|                                                            |                                                  |
| Rules_69                                                   | passed counts:4                                  |
| node_0: feature_name=HuIgG_0.10                            | feature_id[1].value > threshold=19120.166015625  |
| node_112: feature_name=a-HuIgG_0.03                        | feature_id[8].value <= threshold=19665.666015625 |
| node_113: feature_name=SARS.CoV.2.S1.mFcTag                | feature_id[3].value <= threshold=54010.166015625 |
| node_114: feature_name=SARS.CoV.2.S1+S2                    | feature_id[12].value > threshold=47258.43359375  |

|                                                         |                                                     |
|---------------------------------------------------------|-----------------------------------------------------|
| node_240: feature_name=HuIgG_0.03                       | feature_id[5].value > threshold=5455.5              |
| node_266: feature_name=HuIgG_0.10                       | feature_id[1].value > threshold=24231.0             |
| node_284: feature_name=HuIgG_0.03                       | feature_id[5].value > threshold=5469.0              |
| node_286: feature_name=HuIgG_0.10                       | feature_id[1].value <= threshold=30107.666015625    |
| node_287: feature_name=SARS.CoV.2.S1+S2                 | feature_id[12].value > threshold=47536.224609375    |
| node_291: feature_name=SARS.CoV.2.S2                    | feature_id[2].value <= threshold=37653.75           |
| node_292: feature_name=SARS.CoV.2.S2                    | feature_id[2].value > threshold=36044.29296875      |
| node_322: feature_name=hCoV.HKU1.NP                     | feature_id[10].value > threshold=2383.1666870117188 |
| node_324: feature_name=SARS.CoV.2.S1+S2                 | feature_id[12].value > threshold=49449.75           |
| Class: healthcare workers 60–180 days after vaccination |                                                     |
|                                                         |                                                     |
| Rules_70                                                | passed counts:4                                     |
| node_0: feature_name=HuIgG_0.10                         | feature_id[1].value > threshold=19120.166015625     |
| node_112: feature_name=a-HuIgG_0.03                     | feature_id[8].value <= threshold=19665.666015625    |
| node_113: feature_name=SARS.CoV.2.S1.mFcTag             | feature_id[3].value <= threshold=54010.166015625    |
| node_114: feature_name=SARS.CoV.2.S1+S2                 | feature_id[12].value > threshold=47258.43359375     |
| node_240: feature_name=HuIgG_0.03                       | feature_id[5].value > threshold=5455.5              |
| node_266: feature_name=HuIgG_0.10                       | feature_id[1].value > threshold=24231.0             |
| node_284: feature_name=HuIgG_0.03                       | feature_id[5].value > threshold=5469.0              |
| node_286: feature_name=HuIgG_0.10                       | feature_id[1].value <= threshold=30107.666015625    |
| node_287: feature_name=SARS.CoV.2.S1+S2                 | feature_id[12].value > threshold=47536.224609375    |
| node_291: feature_name=SARS.CoV.2.S2                    | feature_id[2].value <= threshold=37653.75           |
| node_292: feature_name=SARS.CoV.2.S2                    | feature_id[2].value <= threshold=36044.29296875     |
| node_293: feature_name=HuIgG_0.03                       | feature_id[5].value > threshold=6329.5              |
| node_301: feature_name=HuIgG_0.03                       | feature_id[5].value > threshold=6562.16650390625    |

|                                                            |                                                     |
|------------------------------------------------------------|-----------------------------------------------------|
| node_307: feature_name=Flu.B_Phu/.HA1+HA2                  | feature_id[11].value <= threshold=54123.5           |
| node_308: feature_name=MoIgA_0.10                          | feature_id[13].value > threshold=21.166666984558105 |
| node_310: feature_name=hCoV.NL63.S1_S2                     | feature_id[7].value <= threshold=33291.458984375    |
| node_311: feature_name=SARS.CoV.2.S1+S2                    | feature_id[12].value <= threshold=49482.583984375   |
| Class: healthcare workers within 60 days after vaccination |                                                     |
|                                                            |                                                     |
| Rules_71                                                   | passed counts:4                                     |
| node_0: feature_name=HuIgG_0.10                            | feature_id[1].value > threshold=19120.166015625     |
| node_112: feature_name=a-HuIgG_0.03                        | feature_id[8].value <= threshold=19665.666015625    |
| node_113: feature_name=SARS.CoV.2.S1.mFcTag                | feature_id[3].value <= threshold=54010.166015625    |
| node_114: feature_name=SARS.CoV.2.S1+S2                    | feature_id[12].value > threshold=47258.43359375     |
| node_240: feature_name=HuIgG_0.03                          | feature_id[5].value > threshold=5455.5              |
| node_266: feature_name=HuIgG_0.10                          | feature_id[1].value > threshold=24231.0             |
| node_284: feature_name=HuIgG_0.03                          | feature_id[5].value > threshold=5469.0              |
| node_286: feature_name=HuIgG_0.10                          | feature_id[1].value <= threshold=30107.666015625    |
| node_287: feature_name=SARS.CoV.2.S1+S2                    | feature_id[12].value > threshold=47536.224609375    |
| node_291: feature_name=SARS.CoV.2.S2                       | feature_id[2].value <= threshold=37653.75           |
| node_292: feature_name=SARS.CoV.2.S2                       | feature_id[2].value <= threshold=36044.29296875     |
| node_293: feature_name=HuIgG_0.03                          | feature_id[5].value <= threshold=6329.5             |
| node_294: feature_name=Flu.B_Phu/.HA1+HA2                  | feature_id[11].value > threshold=50410.16796875     |
| node_296: feature_name=HuIgG_0.03                          | feature_id[5].value <= threshold=5639.0             |
| node_297: feature_name=SARS.CoV.2.S2                       | feature_id[2].value <= threshold=30354.591796875    |
| Class: healthcare workers within 60 days after vaccination |                                                     |
|                                                            |                                                     |
| Rules_72                                                   | passed counts:4                                     |

|                                                            |                                                     |
|------------------------------------------------------------|-----------------------------------------------------|
| node_0: feature_name=HuIgG_0.10                            | feature_id[1].value > threshold=19120.166015625     |
| node_112: feature_name=a-HuIgG_0.03                        | feature_id[8].value <= threshold=19665.666015625    |
| node_113: feature_name=SARS.CoV.2.S1.mFcTag                | feature_id[3].value <= threshold=54010.166015625    |
| node_114: feature_name=SARS.CoV.2.S1+S2                    | feature_id[12].value > threshold=47258.43359375     |
| node_240: feature_name=HuIgG_0.03                          | feature_id[5].value <= threshold=5455.5             |
| node_241: feature_name=SARS.CoV.S1.HisTag                  | feature_id[6].value > threshold=745.7222290039062   |
| node_243: feature_name=SARS.CoV.2.S1+S2                    | feature_id[12].value > threshold=48812.91796875     |
| node_253: feature_name=SARS.CoV.S1.HisTag                  | feature_id[6].value > threshold=2772.300048828125   |
| node_257: feature_name=HuIgG_0.10                          | feature_id[1].value > threshold=26991.8330078125    |
| node_263: feature_name=a-HuIgG_0.03                        | feature_id[8].value > threshold=11532.0             |
| Class: healthcare workers within 60 days after vaccination |                                                     |
|                                                            |                                                     |
| Rules_73                                                   | passed counts:4                                     |
| node_0: feature_name=HuIgG_0.10                            | feature_id[1].value > threshold=19120.166015625     |
| node_112: feature_name=a-HuIgG_0.03                        | feature_id[8].value <= threshold=19665.666015625    |
| node_113: feature_name=SARS.CoV.2.S1.mFcTag                | feature_id[3].value <= threshold=54010.166015625    |
| node_114: feature_name=SARS.CoV.2.S1+S2                    | feature_id[12].value <= threshold=47258.43359375    |
| node_115: feature_name=SARS.CoV.2.S1.RBD.mFc               | feature_id[0].value <= threshold=301.73333740234375 |
| node_116: feature_name=SARS.CoV.2.S1+S2                    | feature_id[12].value <= threshold=3298.25           |
| node_117: feature_name=a-HuIgG_0.30                        | feature_id[4].value > threshold=2425.3333129882812  |
| Class: healthcare workers within 60 days after vaccination |                                                     |
|                                                            |                                                     |
| Rules_74                                                   | passed counts:4                                     |
| node_0: feature_name=HuIgG_0.10                            | feature_id[1].value <= threshold=19120.166015625    |
| node_1: feature_name=SARS.CoV.2.S1.mFcTag                  | feature_id[3].value > threshold=5354.388916015625   |

|                                                           |                                                   |
|-----------------------------------------------------------|---------------------------------------------------|
| node_9: feature_name=a-HuIgG_0.30                         | feature_id[4].value > threshold=33726.833984375   |
| node_55: feature_name=SARS.CoV.2.S1.mFcTag                | feature_id[3].value > threshold=43185.68359375    |
| node_67: feature_name=a-HuIgG_0.03                        | feature_id[8].value > threshold=10858.0           |
| node_83: feature_name=HuIgG_0.03                          | feature_id[5].value <= threshold=3796.0           |
| node_84: feature_name=hCoV.NL63.S1_S2                     | feature_id[7].value > threshold=29814.5           |
| node_96: feature_name=hCoV.NL63.S1_S2                     | feature_id[7].value > threshold=34078.0           |
| node_98: feature_name=SARS.CoV.S1.HisTag                  | feature_id[6].value > threshold=9674.150390625    |
| node_100: feature_name=SARS.CoV.2.S1.mFcTag               | feature_id[3].value <= threshold=55180.015625     |
| Class: healthcare workers over 180 days after vaccination |                                                   |
|                                                           |                                                   |
| Rules_75                                                  | passed counts:4                                   |
| node_0: feature_name=HuIgG_0.10                           | feature_id[1].value <= threshold=19120.166015625  |
| node_1: feature_name=SARS.CoV.2.S1.mFcTag                 | feature_id[3].value > threshold=5354.388916015625 |
| node_9: feature_name=a-HuIgG_0.30                         | feature_id[4].value > threshold=33726.833984375   |
| node_55: feature_name=SARS.CoV.2.S1.mFcTag                | feature_id[3].value > threshold=43185.68359375    |
| node_67: feature_name=a-HuIgG_0.03                        | feature_id[8].value > threshold=10858.0           |
| node_83: feature_name=HuIgG_0.03                          | feature_id[5].value <= threshold=3796.0           |
| node_84: feature_name=hCoV.NL63.S1_S2                     | feature_id[7].value <= threshold=29814.5          |
| node_85: feature_name=hCoV.NL63.S1_S2                     | feature_id[7].value <= threshold=22280.4169921875 |
| node_86: feature_name=Flu.B_Phu/.HA1+HA2                  | feature_id[11].value <= threshold=50957.43359375  |
| Class: healthcare workers over 180 days after vaccination |                                                   |
|                                                           |                                                   |
| Rules_76                                                  | passed counts:4                                   |
| node_0: feature_name=HuIgG_0.10                           | feature_id[1].value <= threshold=19120.166015625  |
| node_1: feature_name=SARS.CoV.2.S1.mFcTag                 | feature_id[3].value > threshold=5354.388916015625 |



|                                                           |                                                     |
|-----------------------------------------------------------|-----------------------------------------------------|
| node_9: feature_name=a-HuIgG_0.30                         | feature_id[4].value <= threshold=33726.833984375    |
| node_10: feature_name=HuIgG_0.03                          | feature_id[5].value > threshold=1023.1666564941406  |
| node_20: feature_name=hCoV.HKU1.NP                        | feature_id[10].value > threshold=-20.05833387374878 |
| node_22: feature_name=SARS.CoV.S1.HisTag                  | feature_id[6].value > threshold=400.3000030517578   |
| node_26: feature_name=SARS.CoV.S1.HisTag                  | feature_id[6].value <= threshold=15087.41650390625  |
| node_27: feature_name=SARS.CoV.2.S1.RBD.mFc               | feature_id[0].value <= threshold=43991.083984375    |
| node_28: feature_name=SARS.CoV.2.S1.RBD.mFc               | feature_id[0].value > threshold=33656.484375        |
| node_30: feature_name=SARS.CoV.2.S1+S2                    | feature_id[12].value <= threshold=30126.75          |
| node_31: feature_name=SARS.CoV.S1.HisTag                  | feature_id[6].value > threshold=3654.1666259765625  |
| Class: healthcare workers over 180 days after vaccination |                                                     |
|                                                           |                                                     |
| Rules_77                                                  | passed counts:4                                     |
| node_0: feature_name=HuIgG_0.10                           | feature_id[1].value <= threshold=19120.166015625    |
| node_1: feature_name=SARS.CoV.2.S1.mFcTag                 | feature_id[3].value <= threshold=5354.388916015625  |
| node_2: feature_name=SARS.CoV.S1.HisTag                   | feature_id[6].value > threshold=-423.2833251953125  |
| node_4: feature_name=SARS.CoV.2.S2                        | feature_id[2].value <= threshold=566.3889007568359  |
| node_5: feature_name=SARS.CoV.2.S2                        | feature_id[2].value <= threshold=462.55555725097656 |
| Class: unvaccinated healthcare workers                    |                                                     |
|                                                           |                                                     |
| Rules_78                                                  | passed counts:3                                     |
| node_0: feature_name=HuIgG_0.10                           | feature_id[1].value > threshold=19120.166015625     |
| node_112: feature_name=a-HuIgG_0.03                       | feature_id[8].value > threshold=19665.666015625     |
| node_428: feature_name=SARS.CoV.2.Spike.RBD.rFc           | feature_id[9].value <= threshold=55147.1484375      |
| node_429: feature_name=a-HuIgG_0.30                       | feature_id[4].value > threshold=51289.166015625     |
| node_437: feature_name=HuIgG_0.10                         | feature_id[1].value > threshold=25959.0             |

|                                                           |                                                      |
|-----------------------------------------------------------|------------------------------------------------------|
| node_441: feature_name=hCoV.NL63.S1_S2                    | feature_id[7].value <= threshold=43930.5234375       |
| node_442: feature_name=a-HuIgG_0.03                       | feature_id[8].value <= threshold=23272.1669921875    |
| node_443: feature_name=hCoV.HKU1.NP                       | feature_id[10].value > threshold=1474.3833312988281  |
| Class: healthcare workers over 180 days after vaccination |                                                      |
|                                                           |                                                      |
| Rules_79                                                  | passed counts:3                                      |
| node_0: feature_name=HuIgG_0.10                           | feature_id[1].value > threshold=19120.166015625      |
| node_112: feature_name=a-HuIgG_0.03                       | feature_id[8].value > threshold=19665.666015625      |
| node_428: feature_name=SARS.CoV.2.Spike.RBD.rFc           | feature_id[9].value <= threshold=55147.1484375       |
| node_429: feature_name=a-HuIgG_0.30                       | feature_id[4].value > threshold=51289.166015625      |
| node_437: feature_name=HuIgG_0.10                         | feature_id[1].value > threshold=25959.0              |
| node_441: feature_name=hCoV.NL63.S1_S2                    | feature_id[7].value <= threshold=43930.5234375       |
| node_442: feature_name=a-HuIgG_0.03                       | feature_id[8].value <= threshold=23272.1669921875    |
| node_443: feature_name=hCoV.HKU1.NP                       | feature_id[10].value <= threshold=1474.3833312988281 |
| node_444: feature_name=a-HuIgG_0.03                       | feature_id[8].value <= threshold=22815.1669921875    |
| Class: healthcare workers 60–180 days after vaccination   |                                                      |
|                                                           |                                                      |
| Rules_80                                                  | passed counts:3                                      |
| node_0: feature_name=HuIgG_0.10                           | feature_id[1].value > threshold=19120.166015625      |
| node_112: feature_name=a-HuIgG_0.03                       | feature_id[8].value > threshold=19665.666015625      |
| node_428: feature_name=SARS.CoV.2.Spike.RBD.rFc           | feature_id[9].value <= threshold=55147.1484375       |
| node_429: feature_name=a-HuIgG_0.30                       | feature_id[4].value <= threshold=51289.166015625     |
| node_430: feature_name=Flu.B_Phu/.HA1+HA2                 | feature_id[11].value <= threshold=48173.93359375     |
| node_431: feature_name=SARS.CoV.2.S1+S2                   | feature_id[12].value > threshold=39605.06640625      |
| Class: healthcare workers over 180 days after vaccination |                                                      |

|                                                            |                                                     |
|------------------------------------------------------------|-----------------------------------------------------|
|                                                            |                                                     |
| Rules_81                                                   | passed counts:3                                     |
| node_0: feature_name=HuIgG_0.10                            | feature_id[1].value > threshold=19120.166015625     |
| node_112: feature_name=a-HuIgG_0.03                        | feature_id[8].value <= threshold=19665.666015625    |
| node_113: feature_name=SARS.CoV.2.S1.mFcTag                | feature_id[3].value > threshold=54010.166015625     |
| node_351: feature_name=SARS.CoV.2.S2                       | feature_id[2].value > threshold=37075.75            |
| node_391: feature_name=SARS.CoV.2.S1.mFcTag                | feature_id[3].value <= threshold=55462.833984375    |
| node_392: feature_name=SARS.CoV.2.S1.mFcTag                | feature_id[3].value <= threshold=55163.634765625    |
| node_393: feature_name=hCoV.HKU1.NP                        | feature_id[10].value <= threshold=14561.3330078125  |
| node_394: feature_name=hCoV.HKU1.NP                        | feature_id[10].value > threshold=6453.333251953125  |
| node_412: feature_name=HuIgG_0.03                          | feature_id[5].value > threshold=4766.166748046875   |
| node_414: feature_name=MoIgA_0.10                          | feature_id[13].value > threshold=2918.0             |
| node_416: feature_name=HuIgG_0.03                          | feature_id[5].value <= threshold=6174.0             |
| Class: healthcare workers within 60 days after vaccination |                                                     |
|                                                            |                                                     |
| Rules_82                                                   | passed counts:3                                     |
| node_0: feature_name=HuIgG_0.10                            | feature_id[1].value > threshold=19120.166015625     |
| node_112: feature_name=a-HuIgG_0.03                        | feature_id[8].value <= threshold=19665.666015625    |
| node_113: feature_name=SARS.CoV.2.S1.mFcTag                | feature_id[3].value > threshold=54010.166015625     |
| node_351: feature_name=SARS.CoV.2.S2                       | feature_id[2].value > threshold=37075.75            |
| node_391: feature_name=SARS.CoV.2.S1.mFcTag                | feature_id[3].value <= threshold=55462.833984375    |
| node_392: feature_name=SARS.CoV.2.S1.mFcTag                | feature_id[3].value <= threshold=55163.634765625    |
| node_393: feature_name=hCoV.HKU1.NP                        | feature_id[10].value <= threshold=14561.3330078125  |
| node_394: feature_name=hCoV.HKU1.NP                        | feature_id[10].value <= threshold=6453.333251953125 |
| node_395: feature_name=hCoV.HKU1.NP                        | feature_id[10].value > threshold=1990.1666259765625 |

|                                                            |                                                      |
|------------------------------------------------------------|------------------------------------------------------|
| node_407: feature_name=SARS.CoV.2.S1.RBD.mFc               | feature_id[0].value <= threshold=48385.75            |
| Class: healthcare workers 60–180 days after vaccination    |                                                      |
|                                                            |                                                      |
| Rules_83                                                   | passed counts:3                                      |
| node_0: feature_name=HuIgG_0.10                            | feature_id[1].value > threshold=19120.166015625      |
| node_112: feature_name=a-HuIgG_0.03                        | feature_id[8].value <= threshold=19665.666015625     |
| node_113: feature_name=SARS.CoV.2.S1.mFcTag                | feature_id[3].value > threshold=54010.166015625      |
| node_351: feature_name=SARS.CoV.2.S2                       | feature_id[2].value > threshold=37075.75             |
| node_391: feature_name=SARS.CoV.2.S1.mFcTag                | feature_id[3].value <= threshold=55462.833984375     |
| node_392: feature_name=SARS.CoV.2.S1.mFcTag                | feature_id[3].value <= threshold=55163.634765625     |
| node_393: feature_name=hCoV.HKU1.NP                        | feature_id[10].value <= threshold=14561.3330078125   |
| node_394: feature_name=hCoV.HKU1.NP                        | feature_id[10].value <= threshold=6453.333251953125  |
| node_395: feature_name=hCoV.HKU1.NP                        | feature_id[10].value <= threshold=1990.1666259765625 |
| node_396: feature_name=SARS.CoV.S1.HisTag                  | feature_id[6].value <= threshold=12607.2998046875    |
| Class: healthcare workers within 60 days after vaccination |                                                      |
|                                                            |                                                      |
| Rules_84                                                   | passed counts:3                                      |
| node_0: feature_name=HuIgG_0.10                            | feature_id[1].value > threshold=19120.166015625      |
| node_112: feature_name=a-HuIgG_0.03                        | feature_id[8].value <= threshold=19665.666015625     |
| node_113: feature_name=SARS.CoV.2.S1.mFcTag                | feature_id[3].value > threshold=54010.166015625      |
| node_351: feature_name=SARS.CoV.2.S2                       | feature_id[2].value <= threshold=37075.75            |
| node_352: feature_name=a-HuIgG_0.03                        | feature_id[8].value > threshold=17721.1669921875     |
| node_386: feature_name=hCoV.HKU1.NP                        | feature_id[10].value > threshold=4175.4998779296875  |
| Class: healthcare workers within 60 days after vaccination |                                                      |
|                                                            |                                                      |

|                                                            |                                                   |
|------------------------------------------------------------|---------------------------------------------------|
| Rules_85                                                   | passed counts:3                                   |
| node_0: feature_name=HuIgG_0.10                            | feature_id[1].value > threshold=19120.166015625   |
| node_112: feature_name=a-HuIgG_0.03                        | feature_id[8].value <= threshold=19665.666015625  |
| node_113: feature_name=SARS.CoV.2.S1.mFcTag                | feature_id[3].value > threshold=54010.166015625   |
| node_351: feature_name=SARS.CoV.2.S2                       | feature_id[2].value <= threshold=37075.75         |
| node_352: feature_name=a-HuIgG_0.03                        | feature_id[8].value <= threshold=17721.1669921875 |
| node_353: feature_name=MoIgA_0.10                          | feature_id[13].value <= threshold=536.0           |
| node_354: feature_name=hCoV.HKU1.NP                        | feature_id[10].value <= threshold=7098.5          |
| node_355: feature_name=MoIgA_0.10                          | feature_id[13].value > threshold=462.0            |
| Class: healthcare workers within 60 days after vaccination |                                                   |
|                                                            |                                                   |
| Rules_86                                                   | passed counts:3                                   |
| node_0: feature_name=HuIgG_0.10                            | feature_id[1].value > threshold=19120.166015625   |
| node_112: feature_name=a-HuIgG_0.03                        | feature_id[8].value <= threshold=19665.666015625  |
| node_113: feature_name=SARS.CoV.2.S1.mFcTag                | feature_id[3].value <= threshold=54010.166015625  |
| node_114: feature_name=SARS.CoV.2.S1+S2                    | feature_id[12].value > threshold=47258.43359375   |
| node_240: feature_name=HuIgG_0.03                          | feature_id[5].value > threshold=5455.5            |
| node_266: feature_name=HuIgG_0.10                          | feature_id[1].value > threshold=24231.0           |
| node_284: feature_name=HuIgG_0.03                          | feature_id[5].value > threshold=5469.0            |
| node_286: feature_name=HuIgG_0.10                          | feature_id[1].value <= threshold=30107.666015625  |
| node_287: feature_name=SARS.CoV.2.S1+S2                    | feature_id[12].value > threshold=47536.224609375  |
| node_291: feature_name=SARS.CoV.2.S2                       | feature_id[2].value <= threshold=37653.75         |
| node_292: feature_name=SARS.CoV.2.S2                       | feature_id[2].value <= threshold=36044.29296875   |
| node_293: feature_name=HuIgG_0.03                          | feature_id[5].value > threshold=6329.5            |
| node_301: feature_name=HuIgG_0.03                          | feature_id[5].value > threshold=6562.16650390625  |

|                                                         |                                                     |
|---------------------------------------------------------|-----------------------------------------------------|
| node_307: feature_name=Flu.B_Phu/.HA1+HA2               | feature_id[11].value <= threshold=54123.5           |
| node_308: feature_name=MoIgA_0.10                       | feature_id[13].value > threshold=21.166666984558105 |
| node_310: feature_name=hCoV.NL63.S1_S2                  | feature_id[7].value <= threshold=33291.458984375    |
| node_311: feature_name=SARS.CoV.2.S1+S2                 | feature_id[12].value > threshold=49482.583984375    |
| Class: healthcare workers 60–180 days after vaccination |                                                     |
|                                                         |                                                     |
| Rules_87                                                | passed counts:3                                     |
| node_0: feature_name=HuIgG_0.10                         | feature_id[1].value > threshold=19120.166015625     |
| node_112: feature_name=a-HuIgG_0.03                     | feature_id[8].value <= threshold=19665.666015625    |
| node_113: feature_name=SARS.CoV.2.S1.mFcTag             | feature_id[3].value <= threshold=54010.166015625    |
| node_114: feature_name=SARS.CoV.2.S1+S2                 | feature_id[12].value > threshold=47258.43359375     |
| node_240: feature_name=HuIgG_0.03                       | feature_id[5].value > threshold=5455.5              |
| node_266: feature_name=HuIgG_0.10                       | feature_id[1].value > threshold=24231.0             |
| node_284: feature_name=HuIgG_0.03                       | feature_id[5].value > threshold=5469.0              |
| node_286: feature_name=HuIgG_0.10                       | feature_id[1].value <= threshold=30107.666015625    |
| node_287: feature_name=SARS.CoV.2.S1+S2                 | feature_id[12].value <= threshold=47536.224609375   |
| node_288: feature_name=MoIgA_0.10                       | feature_id[13].value > threshold=1044.0             |
| Class: healthcare workers 60–180 days after vaccination |                                                     |
|                                                         |                                                     |
| Rules_88                                                | passed counts:3                                     |
| node_0: feature_name=HuIgG_0.10                         | feature_id[1].value > threshold=19120.166015625     |
| node_112: feature_name=a-HuIgG_0.03                     | feature_id[8].value <= threshold=19665.666015625    |
| node_113: feature_name=SARS.CoV.2.S1.mFcTag             | feature_id[3].value <= threshold=54010.166015625    |
| node_114: feature_name=SARS.CoV.2.S1+S2                 | feature_id[12].value > threshold=47258.43359375     |
| node_240: feature_name=HuIgG_0.03                       | feature_id[5].value > threshold=5455.5              |

|                                                            |                                                     |
|------------------------------------------------------------|-----------------------------------------------------|
| node_266: feature_name=HuIgG_0.10                          | feature_id[1].value <= threshold=24231.0            |
| node_267: feature_name=hCoV.HKU1.NP                        | feature_id[10].value > threshold=2123.0000610351562 |
| node_271: feature_name=SARS.CoV.S1.HisTag                  | feature_id[6].value > threshold=8281.83349609375    |
| node_273: feature_name=Flu.B_Phu/.HA1+HA2                  | feature_id[11].value <= threshold=51424.19921875    |
| Class: healthcare workers 60–180 days after vaccination    |                                                     |
|                                                            |                                                     |
| Rules_89                                                   | passed counts:3                                     |
| node_0: feature_name=HuIgG_0.10                            | feature_id[1].value > threshold=19120.166015625     |
| node_112: feature_name=a-HuIgG_0.03                        | feature_id[8].value <= threshold=19665.666015625    |
| node_113: feature_name=SARS.CoV.2.S1.mFcTag                | feature_id[3].value <= threshold=54010.166015625    |
| node_114: feature_name=SARS.CoV.2.S1+S2                    | feature_id[12].value <= threshold=47258.43359375    |
| node_115: feature_name=SARS.CoV.2.S1.RBD.mFc               | feature_id[0].value > threshold=301.73333740234375  |
| node_131: feature_name=a-HuIgG_0.03                        | feature_id[8].value > threshold=12099.83349609375   |
| node_183: feature_name=Flu.B_Phu/.HA1+HA2                  | feature_id[11].value > threshold=41918.533203125    |
| node_187: feature_name=SARS.CoV.2.Spike.RBD.rFc            | feature_id[9].value > threshold=27438.341796875     |
| node_197: feature_name=SARS.CoV.2.S2                       | feature_id[2].value <= threshold=35177.640625       |
| node_198: feature_name=hCoV.HKU1.NP                        | feature_id[10].value > threshold=2645.916748046875  |
| node_210: feature_name=Flu.B_Phu/.HA1+HA2                  | feature_id[11].value <= threshold=54029.166015625   |
| node_211: feature_name=HuIgG_0.10                          | feature_id[1].value > threshold=21359.5             |
| node_213: feature_name=hCoV.NL63.S1_S2                     | feature_id[7].value > threshold=32523.4248046875    |
| node_215: feature_name=HuIgG_0.10                          | feature_id[1].value > threshold=23274.166015625     |
| node_217: feature_name=HuIgG_0.10                          | feature_id[1].value <= threshold=25231.1669921875   |
| node_218: feature_name=hCoV.HKU1.NP                        | feature_id[10].value <= threshold=3712.083251953125 |
| Class: healthcare workers within 60 days after vaccination |                                                     |
|                                                            |                                                     |

|                                                         |                                                     |
|---------------------------------------------------------|-----------------------------------------------------|
| Rules_90                                                | passed counts:3                                     |
| node_0: feature_name=HuIgG_0.10                         | feature_id[1].value > threshold=19120.166015625     |
| node_112: feature_name=a-HuIgG_0.03                     | feature_id[8].value <= threshold=19665.666015625    |
| node_113: feature_name=SARS.CoV.2.S1.mFcTag             | feature_id[3].value <= threshold=54010.166015625    |
| node_114: feature_name=SARS.CoV.2.S1+S2                 | feature_id[12].value <= threshold=47258.43359375    |
| node_115: feature_name=SARS.CoV.2.S1.RBD.mFc            | feature_id[0].value > threshold=301.73333740234375  |
| node_131: feature_name=a-HuIgG_0.03                     | feature_id[8].value <= threshold=12099.83349609375  |
| node_132: feature_name=SARS.CoV.2.S2                    | feature_id[2].value > threshold=8858.0751953125     |
| node_134: feature_name=Flu.B_Phu/.HA1+HA2               | feature_id[11].value <= threshold=53839.16796875    |
| node_135: feature_name=hCoV.HKU1.NP                     | feature_id[10].value > threshold=1010.1666564941406 |
| node_145: feature_name=hCoV.HKU1.NP                     | feature_id[10].value > threshold=15374.16650390625  |
| node_177: feature_name=a-HuIgG_0.03                     | feature_id[8].value <= threshold=11866.5            |
| Class: healthcare workers 60–180 days after vaccination |                                                     |
|                                                         |                                                     |
| Rules_91                                                | passed counts:3                                     |
| node_0: feature_name=HuIgG_0.10                         | feature_id[1].value > threshold=19120.166015625     |
| node_112: feature_name=a-HuIgG_0.03                     | feature_id[8].value <= threshold=19665.666015625    |
| node_113: feature_name=SARS.CoV.2.S1.mFcTag             | feature_id[3].value <= threshold=54010.166015625    |
| node_114: feature_name=SARS.CoV.2.S1+S2                 | feature_id[12].value <= threshold=47258.43359375    |
| node_115: feature_name=SARS.CoV.2.S1.RBD.mFc            | feature_id[0].value > threshold=301.73333740234375  |
| node_131: feature_name=a-HuIgG_0.03                     | feature_id[8].value <= threshold=12099.83349609375  |
| node_132: feature_name=SARS.CoV.2.S2                    | feature_id[2].value > threshold=8858.0751953125     |
| node_134: feature_name=Flu.B_Phu/.HA1+HA2               | feature_id[11].value <= threshold=53839.16796875    |
| node_135: feature_name=hCoV.HKU1.NP                     | feature_id[10].value > threshold=1010.1666564941406 |
| node_145: feature_name=hCoV.HKU1.NP                     | feature_id[10].value <= threshold=15374.16650390625 |



|                                                         |                                                     |
|---------------------------------------------------------|-----------------------------------------------------|
| node_146: feature_name=SARS.CoV.2.S1.mFcTag             | feature_id[3].value > threshold=50683.0             |
| node_168: feature_name=HuIgG_0.10                       | feature_id[1].value > threshold=20669.833984375     |
| node_170: feature_name=SARS.CoV.2.S1.mFcTag             | feature_id[3].value <= threshold=50874.666015625    |
| Class: healthcare workers 60–180 days after vaccination |                                                     |
|                                                         |                                                     |
| Rules_92                                                | passed counts:3                                     |
| node_0: feature_name=HuIgG_0.10                         | feature_id[1].value > threshold=19120.166015625     |
| node_112: feature_name=a-HuIgG_0.03                     | feature_id[8].value <= threshold=19665.666015625    |
| node_113: feature_name=SARS.CoV.2.S1.mFcTag             | feature_id[3].value <= threshold=54010.166015625    |
| node_114: feature_name=SARS.CoV.2.S1+S2                 | feature_id[12].value <= threshold=47258.43359375    |
| node_115: feature_name=SARS.CoV.2.S1.RBD.mFc            | feature_id[0].value > threshold=301.73333740234375  |
| node_131: feature_name=a-HuIgG_0.03                     | feature_id[8].value <= threshold=12099.83349609375  |
| node_132: feature_name=SARS.CoV.2.S2                    | feature_id[2].value > threshold=8858.0751953125     |
| node_134: feature_name=Flu.B_Phu/.HA1+HA2               | feature_id[11].value <= threshold=53839.16796875    |
| node_135: feature_name=hCoV.HKU1.NP                     | feature_id[10].value > threshold=1010.1666564941406 |
| node_145: feature_name=hCoV.HKU1.NP                     | feature_id[10].value <= threshold=15374.16650390625 |
| node_146: feature_name=SARS.CoV.2.S1.mFcTag             | feature_id[3].value > threshold=50683.0             |
| node_168: feature_name=HuIgG_0.10                       | feature_id[1].value <= threshold=20669.833984375    |
| Class: healthcare workers 60–180 days after vaccination |                                                     |
|                                                         |                                                     |
| Rules_93                                                | passed counts:3                                     |
| node_0: feature_name=HuIgG_0.10                         | feature_id[1].value > threshold=19120.166015625     |
| node_112: feature_name=a-HuIgG_0.03                     | feature_id[8].value <= threshold=19665.666015625    |
| node_113: feature_name=SARS.CoV.2.S1.mFcTag             | feature_id[3].value <= threshold=54010.166015625    |
| node_114: feature_name=SARS.CoV.2.S1+S2                 | feature_id[12].value <= threshold=47258.43359375    |

|                                                         |                                                      |
|---------------------------------------------------------|------------------------------------------------------|
| node_115: feature_name=SARS.CoV.2.S1.RBD.mFc            | feature_id[0].value > threshold=301.73333740234375   |
| node_131: feature_name=a-HuIgG_0.03                     | feature_id[8].value <= threshold=12099.83349609375   |
| node_132: feature_name=SARS.CoV.2.S2                    | feature_id[2].value > threshold=8858.0751953125      |
| node_134: feature_name=Flu.B_Phu/.HA1+HA2               | feature_id[11].value <= threshold=53839.16796875     |
| node_135: feature_name=hCoV.HKU1.NP                     | feature_id[10].value <= threshold=1010.1666564941406 |
| node_136: feature_name=MoIgA_0.10                       | feature_id[13].value <= threshold=497.8333282470703  |
| node_137: feature_name=MoIgA_0.10                       | feature_id[13].value <= threshold=153.0              |
| node_138: feature_name=SARS.CoV.S1.HisTag               | feature_id[6].value <= threshold=14632.4169921875    |
| Class: healthcare workers 60–180 days after vaccination |                                                      |
|                                                         |                                                      |
| Rules_94                                                | passed counts:3                                      |
| node_0: feature_name=HuIgG_0.10                         | feature_id[1].value > threshold=19120.166015625      |
| node_112: feature_name=a-HuIgG_0.03                     | feature_id[8].value <= threshold=19665.666015625     |
| node_113: feature_name=SARS.CoV.2.S1.mFcTag             | feature_id[3].value <= threshold=54010.166015625     |
| node_114: feature_name=SARS.CoV.2.S1+S2                 | feature_id[12].value <= threshold=47258.43359375     |
| node_115: feature_name=SARS.CoV.2.S1.RBD.mFc            | feature_id[0].value <= threshold=301.73333740234375  |
| node_116: feature_name=SARS.CoV.2.S1+S2                 | feature_id[12].value > threshold=3298.25             |
| node_122: feature_name=SARS.CoV.2.S1.mFcTag             | feature_id[3].value > threshold=-1493.1666870117188  |
| node_124: feature_name=hCoV.HKU1.NP                     | feature_id[10].value <= threshold=11908.138671875    |
| node_125: feature_name=SARS.CoV.2.S1.RBD.mFc            | feature_id[0].value > threshold=82.01666641235352    |
| node_127: feature_name=a-HuIgG_0.30                     | feature_id[4].value > threshold=39543.0              |
| Class: unvaccinated healthcare workers                  |                                                      |
|                                                         |                                                      |
| Rules_95                                                | passed counts:3                                      |
| node_0: feature_name=HuIgG_0.10                         | feature_id[1].value <= threshold=19120.166015625     |

|                                                            |                                                   |
|------------------------------------------------------------|---------------------------------------------------|
| node_1: feature_name=SARS.CoV.2.S1.mFcTag                  | feature_id[3].value > threshold=5354.388916015625 |
| node_9: feature_name=a-HuIgG_0.30                          | feature_id[4].value > threshold=33726.833984375   |
| node_55: feature_name=SARS.CoV.2.S1.mFcTag                 | feature_id[3].value > threshold=43185.68359375    |
| node_67: feature_name=a-HuIgG_0.03                         | feature_id[8].value > threshold=10858.0           |
| node_83: feature_name=HuIgG_0.03                           | feature_id[5].value > threshold=3796.0            |
| node_103: feature_name=SARS.CoV.2.S1+S2                    | feature_id[12].value > threshold=49967.91796875   |
| node_107: feature_name=hCoV.NL63.S1_S2                     | feature_id[7].value > threshold=28891.8330078125  |
| Class: healthcare workers within 60 days after vaccination |                                                   |
|                                                            |                                                   |
| Rules_96                                                   | passed counts:3                                   |
| node_0: feature_name=HuIgG_0.10                            | feature_id[1].value <= threshold=19120.166015625  |
| node_1: feature_name=SARS.CoV.2.S1.mFcTag                  | feature_id[3].value > threshold=5354.388916015625 |
| node_9: feature_name=a-HuIgG_0.30                          | feature_id[4].value > threshold=33726.833984375   |
| node_55: feature_name=SARS.CoV.2.S1.mFcTag                 | feature_id[3].value > threshold=43185.68359375    |
| node_67: feature_name=a-HuIgG_0.03                         | feature_id[8].value > threshold=10858.0           |
| node_83: feature_name=HuIgG_0.03                           | feature_id[5].value <= threshold=3796.0           |
| node_84: feature_name=hCoV.NL63.S1_S2                      | feature_id[7].value > threshold=29814.5           |
| node_96: feature_name=hCoV.NL63.S1_S2                      | feature_id[7].value > threshold=34078.0           |
| node_98: feature_name=SARS.CoV.S1.HisTag                   | feature_id[6].value <= threshold=9674.150390625   |
| Class: healthcare workers 60–180 days after vaccination    |                                                   |
|                                                            |                                                   |
| Rules_97                                                   | passed counts:3                                   |
| node_0: feature_name=HuIgG_0.10                            | feature_id[1].value <= threshold=19120.166015625  |
| node_1: feature_name=SARS.CoV.2.S1.mFcTag                  | feature_id[3].value > threshold=5354.388916015625 |
| node_9: feature_name=a-HuIgG_0.30                          | feature_id[4].value > threshold=33726.833984375   |

|                                                            |                                                     |
|------------------------------------------------------------|-----------------------------------------------------|
| node_55: feature_name=SARS.CoV.2.S1.mFcTag                 | feature_id[3].value > threshold=43185.68359375      |
| node_67: feature_name=a-HuIgG_0.03                         | feature_id[8].value <= threshold=10858.0            |
| node_68: feature_name=MoIgA_0.10                           | feature_id[13].value > threshold=246.83333587646484 |
| node_76: feature_name=SARS.CoV.2.Spike.RBD.rFc             | feature_id[9].value <= threshold=54060.41796875     |
| node_77: feature_name=a-HuIgG_0.03                         | feature_id[8].value > threshold=10179.0             |
| node_79: feature_name=hCoV.HKU1.NP                         | feature_id[10].value > threshold=2203.3333129882812 |
| Class: healthcare workers within 60 days after vaccination |                                                     |
|                                                            |                                                     |
| Rules_98                                                   | passed counts:3                                     |
| node_0: feature_name=HuIgG_0.10                            | feature_id[1].value <= threshold=19120.166015625    |
| node_1: feature_name=SARS.CoV.2.S1.mFcTag                  | feature_id[3].value > threshold=5354.388916015625   |
| node_9: feature_name=a-HuIgG_0.30                          | feature_id[4].value > threshold=33726.833984375     |
| node_55: feature_name=SARS.CoV.2.S1.mFcTag                 | feature_id[3].value <= threshold=43185.68359375     |
| node_56: feature_name=SARS.CoV.S1.HisTag                   | feature_id[6].value > threshold=1493.4166870117188  |
| node_62: feature_name=SARS.CoV.2.S1+S2                     | feature_id[12].value <= threshold=22078.1669921875  |
| node_63: feature_name=SARS.CoV.2.S1+S2                     | feature_id[12].value <= threshold=21810.333984375   |
| Class: healthcare workers over 180 days after vaccination  |                                                     |
|                                                            |                                                     |
| Rules_99                                                   | passed counts:3                                     |
| node_0: feature_name=HuIgG_0.10                            | feature_id[1].value <= threshold=19120.166015625    |
| node_1: feature_name=SARS.CoV.2.S1.mFcTag                  | feature_id[3].value > threshold=5354.388916015625   |
| node_9: feature_name=a-HuIgG_0.30                          | feature_id[4].value > threshold=33726.833984375     |
| node_55: feature_name=SARS.CoV.2.S1.mFcTag                 | feature_id[3].value <= threshold=43185.68359375     |
| node_56: feature_name=SARS.CoV.S1.HisTag                   | feature_id[6].value <= threshold=1493.4166870117188 |
| node_57: feature_name=SARS.CoV.2.S1.mFcTag                 | feature_id[3].value > threshold=24427.2880859375    |

|                                                            |                                                     |
|------------------------------------------------------------|-----------------------------------------------------|
| Class: unvaccinated healthcare workers                     |                                                     |
|                                                            |                                                     |
| Rules_100                                                  | passed counts:3                                     |
| node_0: feature_name=HuIgG_0.10                            | feature_id[1].value <= threshold=19120.166015625    |
| node_1: feature_name=SARS.CoV.2.S1.mFcTag                  | feature_id[3].value > threshold=5354.388916015625   |
| node_9: feature_name=a-HuIgG_0.30                          | feature_id[4].value <= threshold=33726.833984375    |
| node_10: feature_name=HuIgG_0.03                           | feature_id[5].value > threshold=1023.1666564941406  |
| node_20: feature_name=hCoV.HKU1.NP                         | feature_id[10].value > threshold=-20.05833387374878 |
| node_22: feature_name=SARS.CoV.S1.HisTag                   | feature_id[6].value > threshold=400.3000030517578   |
| node_26: feature_name=SARS.CoV.S1.HisTag                   | feature_id[6].value > threshold=15087.41650390625   |
| node_38: feature_name=hCoV.HKU1.NP                         | feature_id[10].value <= threshold=348.6666564941406 |
| node_39: feature_name=hCoV.NL63.S1_S2                      | feature_id[7].value > threshold=26557.333984375     |
| Class: healthcare workers within 60 days after vaccination |                                                     |
|                                                            |                                                     |
| Rules_101                                                  | passed counts:3                                     |
| node_0: feature_name=HuIgG_0.10                            | feature_id[1].value <= threshold=19120.166015625    |
| node_1: feature_name=SARS.CoV.2.S1.mFcTag                  | feature_id[3].value > threshold=5354.388916015625   |
| node_9: feature_name=a-HuIgG_0.30                          | feature_id[4].value <= threshold=33726.833984375    |
| node_10: feature_name=HuIgG_0.03                           | feature_id[5].value > threshold=1023.1666564941406  |
| node_20: feature_name=hCoV.HKU1.NP                         | feature_id[10].value > threshold=-20.05833387374878 |
| node_22: feature_name=SARS.CoV.S1.HisTag                   | feature_id[6].value > threshold=400.3000030517578   |
| node_26: feature_name=SARS.CoV.S1.HisTag                   | feature_id[6].value <= threshold=15087.41650390625  |
| node_27: feature_name=SARS.CoV.2.S1.RBD.mFc                | feature_id[0].value > threshold=43991.083984375     |
| node_35: feature_name=SARS.CoV.S1.HisTag                   | feature_id[6].value > threshold=5744.75             |
| Class: healthcare workers 60–180 days after vaccination    |                                                     |

|                                                            |                                                      |
|------------------------------------------------------------|------------------------------------------------------|
| Rules_102                                                  | passed counts:2                                      |
| node_0: feature_name=HuIgG_0.10                            | feature_id[1].value > threshold=19120.166015625      |
| node_112: feature_name=a-HuIgG_0.03                        | feature_id[8].value > threshold=19665.666015625      |
| node_428: feature_name=SARS.CoV.2.Spike.RBD.rFc            | feature_id[9].value <= threshold=55147.1484375       |
| node_429: feature_name=a-HuIgG_0.30                        | feature_id[4].value > threshold=51289.166015625      |
| node_437: feature_name=HuIgG_0.10                          | feature_id[1].value > threshold=25959.0              |
| node_441: feature_name=hCoV.NL63.S1_S2                     | feature_id[7].value > threshold=43930.5234375        |
| Class: healthcare workers within 60 days after vaccination |                                                      |
| Rules_103                                                  | passed counts:2                                      |
| node_0: feature_name=HuIgG_0.10                            | feature_id[1].value > threshold=19120.166015625      |
| node_112: feature_name=a-HuIgG_0.03                        | feature_id[8].value > threshold=19665.666015625      |
| node_428: feature_name=SARS.CoV.2.Spike.RBD.rFc            | feature_id[9].value <= threshold=55147.1484375       |
| node_429: feature_name=a-HuIgG_0.30                        | feature_id[4].value > threshold=51289.166015625      |
| node_437: feature_name=HuIgG_0.10                          | feature_id[1].value > threshold=25959.0              |
| node_441: feature_name=hCoV.NL63.S1_S2                     | feature_id[7].value <= threshold=43930.5234375       |
| node_442: feature_name=a-HuIgG_0.03                        | feature_id[8].value <= threshold=23272.1669921875    |
| node_443: feature_name=hCoV.HKU1.NP                        | feature_id[10].value <= threshold=1474.3833312988281 |
| node_444: feature_name=a-HuIgG_0.03                        | feature_id[8].value > threshold=22815.1669921875     |
| Class: healthcare workers over 180 days after vaccination  |                                                      |
| Rules_104                                                  | passed counts:2                                      |
| node_0: feature_name=HuIgG_0.10                            | feature_id[1].value > threshold=19120.166015625      |
| node_112: feature_name=a-HuIgG_0.03                        | feature_id[8].value <= threshold=19665.666015625     |

|                                                            |                                                      |
|------------------------------------------------------------|------------------------------------------------------|
| node_113: feature_name=SARS.CoV.2.S1.mFcTag                | feature_id[3].value > threshold=54010.166015625      |
| node_351: feature_name=SARS.CoV.2.S2                       | feature_id[2].value > threshold=37075.75             |
| node_391: feature_name=SARS.CoV.2.S1.mFcTag                | feature_id[3].value <= threshold=55462.833984375     |
| node_392: feature_name=SARS.CoV.2.S1.mFcTag                | feature_id[3].value <= threshold=55163.634765625     |
| node_393: feature_name=hCoV.HKU1.NP                        | feature_id[10].value <= threshold=14561.3330078125   |
| node_394: feature_name=hCoV.HKU1.NP                        | feature_id[10].value > threshold=6453.333251953125   |
| node_412: feature_name=HuIgG_0.03                          | feature_id[5].value <= threshold=4766.166748046875   |
| Class: healthcare workers within 60 days after vaccination |                                                      |
|                                                            |                                                      |
| Rules_105                                                  | passed counts:2                                      |
| node_0: feature_name=HuIgG_0.10                            | feature_id[1].value > threshold=19120.166015625      |
| node_112: feature_name=a-HuIgG_0.03                        | feature_id[8].value <= threshold=19665.666015625     |
| node_113: feature_name=SARS.CoV.2.S1.mFcTag                | feature_id[3].value > threshold=54010.166015625      |
| node_351: feature_name=SARS.CoV.2.S2                       | feature_id[2].value <= threshold=37075.75            |
| node_352: feature_name=a-HuIgG_0.03                        | feature_id[8].value > threshold=17721.1669921875     |
| node_386: feature_name=hCoV.HKU1.NP                        | feature_id[10].value <= threshold=4175.4998779296875 |
| node_387: feature_name=hCoV.HKU1.NP                        | feature_id[10].value <= threshold=3016.9666748046875 |
| Class: healthcare workers over 180 days after vaccination  |                                                      |
|                                                            |                                                      |
| Rules_106                                                  | passed counts:2                                      |
| node_0: feature_name=HuIgG_0.10                            | feature_id[1].value > threshold=19120.166015625      |
| node_112: feature_name=a-HuIgG_0.03                        | feature_id[8].value <= threshold=19665.666015625     |
| node_113: feature_name=SARS.CoV.2.S1.mFcTag                | feature_id[3].value > threshold=54010.166015625      |
| node_351: feature_name=SARS.CoV.2.S2                       | feature_id[2].value <= threshold=37075.75            |
| node_352: feature_name=a-HuIgG_0.03                        | feature_id[8].value <= threshold=17721.1669921875    |

|                                                           |                                                      |
|-----------------------------------------------------------|------------------------------------------------------|
| node_353: feature_name=MoIgA_0.10                         | feature_id[13].value > threshold=536.0               |
| node_367: feature_name=HuIgG_0.03                         | feature_id[5].value <= threshold=5634.333251953125   |
| node_368: feature_name=SARS.CoV.2.S1+S2                   | feature_id[12].value <= threshold=52432.75           |
| node_369: feature_name=SARS.CoV.S1.HisTag                 | feature_id[6].value > threshold=17773.60009765625    |
| Class: healthcare workers over 180 days after vaccination |                                                      |
|                                                           |                                                      |
| Rules_107                                                 | passed counts:2                                      |
| node_0: feature_name=HuIgG_0.10                           | feature_id[1].value > threshold=19120.166015625      |
| node_112: feature_name=a-HuIgG_0.03                       | feature_id[8].value <= threshold=19665.666015625     |
| node_113: feature_name=SARS.CoV.2.S1.mFcTag               | feature_id[3].value > threshold=54010.166015625      |
| node_351: feature_name=SARS.CoV.2.S2                      | feature_id[2].value <= threshold=37075.75            |
| node_352: feature_name=a-HuIgG_0.03                       | feature_id[8].value <= threshold=17721.1669921875    |
| node_353: feature_name=MoIgA_0.10                         | feature_id[13].value <= threshold=536.0              |
| node_354: feature_name=hCoV.HKU1.NP                       | feature_id[10].value <= threshold=7098.5             |
| node_355: feature_name=MoIgA_0.10                         | feature_id[13].value <= threshold=462.0              |
| node_356: feature_name=hCoV.HKU1.NP                       | feature_id[10].value <= threshold=2790.583251953125  |
| node_357: feature_name=hCoV.NL63.S1_S2                    | feature_id[7].value > threshold=36099.0              |
| node_359: feature_name=hCoV.HKU1.NP                       | feature_id[10].value <= threshold=1348.6666870117188 |
| node_360: feature_name=SARS.CoV.S1.HisTag                 | feature_id[6].value > threshold=5850.833251953125    |
| Class: healthcare workers 60–180 days after vaccination   |                                                      |
|                                                           |                                                      |
| Rules_108                                                 | passed counts:2                                      |
| node_0: feature_name=HuIgG_0.10                           | feature_id[1].value > threshold=19120.166015625      |
| node_112: feature_name=a-HuIgG_0.03                       | feature_id[8].value <= threshold=19665.666015625     |
| node_113: feature_name=SARS.CoV.2.S1.mFcTag               | feature_id[3].value <= threshold=54010.166015625     |



|                                                            |                                                     |
|------------------------------------------------------------|-----------------------------------------------------|
| node_114: feature_name=SARS.CoV.2.S1+S2                    | feature_id[12].value > threshold=47258.43359375     |
| node_240: feature_name=HuIgG_0.03                          | feature_id[5].value > threshold=5455.5              |
| node_266: feature_name=HuIgG_0.10                          | feature_id[1].value > threshold=24231.0             |
| node_284: feature_name=HuIgG_0.03                          | feature_id[5].value > threshold=5469.0              |
| node_286: feature_name=HuIgG_0.10                          | feature_id[1].value > threshold=30107.666015625     |
| Class: healthcare workers 60–180 days after vaccination    |                                                     |
|                                                            |                                                     |
| Rules_109                                                  | passed counts:2                                     |
| node_0: feature_name=HuIgG_0.10                            | feature_id[1].value > threshold=19120.166015625     |
| node_112: feature_name=a-HuIgG_0.03                        | feature_id[8].value <= threshold=19665.666015625    |
| node_113: feature_name=SARS.CoV.2.S1.mFcTag                | feature_id[3].value <= threshold=54010.166015625    |
| node_114: feature_name=SARS.CoV.2.S1+S2                    | feature_id[12].value > threshold=47258.43359375     |
| node_240: feature_name=HuIgG_0.03                          | feature_id[5].value > threshold=5455.5              |
| node_266: feature_name=HuIgG_0.10                          | feature_id[1].value > threshold=24231.0             |
| node_284: feature_name=HuIgG_0.03                          | feature_id[5].value > threshold=5469.0              |
| node_286: feature_name=HuIgG_0.10                          | feature_id[1].value <= threshold=30107.666015625    |
| node_287: feature_name=SARS.CoV.2.S1+S2                    | feature_id[12].value > threshold=47536.224609375    |
| node_291: feature_name=SARS.CoV.2.S2                       | feature_id[2].value > threshold=37653.75            |
| node_329: feature_name=SARS.CoV.2.S1.mFcTag                | feature_id[3].value <= threshold=53346.333984375    |
| node_330: feature_name=Flu.B_Phu/.HA1+HA2                  | feature_id[11].value <= threshold=53733.0           |
| node_331: feature_name=MoIgA_0.10                          | feature_id[13].value > threshold=10.833333015441895 |
| node_335: feature_name=a-HuIgG_0.03                        | feature_id[8].value <= threshold=11890.0            |
| node_336: feature_name=HuIgG_0.10                          | feature_id[1].value <= threshold=25504.333984375    |
| Class: healthcare workers within 60 days after vaccination |                                                     |
|                                                            |                                                     |

|                                                            |                                                      |
|------------------------------------------------------------|------------------------------------------------------|
| Rules_110                                                  | passed counts:2                                      |
| node_0: feature_name=HuIgG_0.10                            | feature_id[1].value > threshold=19120.166015625      |
| node_112: feature_name=a-HuIgG_0.03                        | feature_id[8].value <= threshold=19665.666015625     |
| node_113: feature_name=SARS.CoV.2.S1.mFcTag                | feature_id[3].value <= threshold=54010.166015625     |
| node_114: feature_name=SARS.CoV.2.S1+S2                    | feature_id[12].value > threshold=47258.43359375      |
| node_240: feature_name=HuIgG_0.03                          | feature_id[5].value > threshold=5455.5               |
| node_266: feature_name=HuIgG_0.10                          | feature_id[1].value > threshold=24231.0              |
| node_284: feature_name=HuIgG_0.03                          | feature_id[5].value > threshold=5469.0               |
| node_286: feature_name=HuIgG_0.10                          | feature_id[1].value <= threshold=30107.666015625     |
| node_287: feature_name=SARS.CoV.2.S1+S2                    | feature_id[12].value > threshold=47536.224609375     |
| node_291: feature_name=SARS.CoV.2.S2                       | feature_id[2].value <= threshold=37653.75            |
| node_292: feature_name=SARS.CoV.2.S2                       | feature_id[2].value > threshold=36044.29296875       |
| node_322: feature_name=hCoV.HKU1.NP                        | feature_id[10].value <= threshold=2383.1666870117188 |
| Class: healthcare workers within 60 days after vaccination |                                                      |
|                                                            |                                                      |
| Rules_111                                                  | passed counts:2                                      |
| node_0: feature_name=HuIgG_0.10                            | feature_id[1].value > threshold=19120.166015625      |
| node_112: feature_name=a-HuIgG_0.03                        | feature_id[8].value <= threshold=19665.666015625     |
| node_113: feature_name=SARS.CoV.2.S1.mFcTag                | feature_id[3].value <= threshold=54010.166015625     |
| node_114: feature_name=SARS.CoV.2.S1+S2                    | feature_id[12].value > threshold=47258.43359375      |
| node_240: feature_name=HuIgG_0.03                          | feature_id[5].value > threshold=5455.5               |
| node_266: feature_name=HuIgG_0.10                          | feature_id[1].value > threshold=24231.0              |
| node_284: feature_name=HuIgG_0.03                          | feature_id[5].value > threshold=5469.0               |
| node_286: feature_name=HuIgG_0.10                          | feature_id[1].value <= threshold=30107.666015625     |
| node_287: feature_name=SARS.CoV.2.S1+S2                    | feature_id[12].value > threshold=47536.224609375     |

|                                                         |                                                     |
|---------------------------------------------------------|-----------------------------------------------------|
| node_291: feature_name=SARS.CoV.2.S2                    | feature_id[2].value <= threshold=37653.75           |
| node_292: feature_name=SARS.CoV.2.S2                    | feature_id[2].value <= threshold=36044.29296875     |
| node_293: feature_name=HuIgG_0.03                       | feature_id[5].value > threshold=6329.5              |
| node_301: feature_name=HuIgG_0.03                       | feature_id[5].value > threshold=6562.16650390625    |
| node_307: feature_name=Flu.B_Phu/.HA1+HA2               | feature_id[11].value > threshold=54123.5            |
| node_319: feature_name=hCoV.NL63.S1_S2                  | feature_id[7].value <= threshold=43715.833984375    |
| Class: healthcare workers 60–180 days after vaccination |                                                     |
|                                                         |                                                     |
| Rules_112                                               | passed counts:2                                     |
| node_0: feature_name=HuIgG_0.10                         | feature_id[1].value > threshold=19120.166015625     |
| node_112: feature_name=a-HuIgG_0.03                     | feature_id[8].value <= threshold=19665.666015625    |
| node_113: feature_name=SARS.CoV.2.S1.mFcTag             | feature_id[3].value <= threshold=54010.166015625    |
| node_114: feature_name=SARS.CoV.2.S1+S2                 | feature_id[12].value > threshold=47258.43359375     |
| node_240: feature_name=HuIgG_0.03                       | feature_id[5].value > threshold=5455.5              |
| node_266: feature_name=HuIgG_0.10                       | feature_id[1].value > threshold=24231.0             |
| node_284: feature_name=HuIgG_0.03                       | feature_id[5].value > threshold=5469.0              |
| node_286: feature_name=HuIgG_0.10                       | feature_id[1].value <= threshold=30107.666015625    |
| node_287: feature_name=SARS.CoV.2.S1+S2                 | feature_id[12].value > threshold=47536.224609375    |
| node_291: feature_name=SARS.CoV.2.S2                    | feature_id[2].value <= threshold=37653.75           |
| node_292: feature_name=SARS.CoV.2.S2                    | feature_id[2].value <= threshold=36044.29296875     |
| node_293: feature_name=HuIgG_0.03                       | feature_id[5].value > threshold=6329.5              |
| node_301: feature_name=HuIgG_0.03                       | feature_id[5].value > threshold=6562.16650390625    |
| node_307: feature_name=Flu.B_Phu/.HA1+HA2               | feature_id[11].value <= threshold=54123.5           |
| node_308: feature_name=MoIgA_0.10                       | feature_id[13].value > threshold=21.166666984558105 |
| node_310: feature_name=hCoV.NL63.S1_S2                  | feature_id[7].value > threshold=33291.458984375     |

|                                                            |                                                      |
|------------------------------------------------------------|------------------------------------------------------|
| node_314: feature_name=SARS.CoV.2.S1.mFcTag                | feature_id[3].value <= threshold=50604.0             |
| node_315: feature_name=SARS.CoV.2.Spike.RBD.rFc            | feature_id[9].value <= threshold=43138.767578125     |
| Class: healthcare workers within 60 days after vaccination |                                                      |
|                                                            |                                                      |
| Rules_113                                                  | passed counts:2                                      |
| node_0: feature_name=HuIgG_0.10                            | feature_id[1].value > threshold=19120.166015625      |
| node_112: feature_name=a-HuIgG_0.03                        | feature_id[8].value <= threshold=19665.666015625     |
| node_113: feature_name=SARS.CoV.2.S1.mFcTag                | feature_id[3].value <= threshold=54010.166015625     |
| node_114: feature_name=SARS.CoV.2.S1+S2                    | feature_id[12].value > threshold=47258.43359375      |
| node_240: feature_name=HuIgG_0.03                          | feature_id[5].value > threshold=5455.5               |
| node_266: feature_name=HuIgG_0.10                          | feature_id[1].value > threshold=24231.0              |
| node_284: feature_name=HuIgG_0.03                          | feature_id[5].value > threshold=5469.0               |
| node_286: feature_name=HuIgG_0.10                          | feature_id[1].value <= threshold=30107.666015625     |
| node_287: feature_name=SARS.CoV.2.S1+S2                    | feature_id[12].value > threshold=47536.224609375     |
| node_291: feature_name=SARS.CoV.2.S2                       | feature_id[2].value <= threshold=37653.75            |
| node_292: feature_name=SARS.CoV.2.S2                       | feature_id[2].value <= threshold=36044.29296875      |
| node_293: feature_name=HuIgG_0.03                          | feature_id[5].value > threshold=6329.5               |
| node_301: feature_name=HuIgG_0.03                          | feature_id[5].value <= threshold=6562.16650390625    |
| node_302: feature_name=Flu.B_Phu/.HA1+HA2                  | feature_id[11].value > threshold=53338.533203125     |
| node_304: feature_name=hCoV.HKU1.NP                        | feature_id[10].value <= threshold=12278.249755859375 |
| Class: healthcare workers within 60 days after vaccination |                                                      |
|                                                            |                                                      |
| Rules_114                                                  | passed counts:2                                      |
| node_0: feature_name=HuIgG_0.10                            | feature_id[1].value > threshold=19120.166015625      |
| node_112: feature_name=a-HuIgG_0.03                        | feature_id[8].value <= threshold=19665.666015625     |

|                                                         |                                                     |
|---------------------------------------------------------|-----------------------------------------------------|
| node_113: feature_name=SARS.CoV.2.S1.mFcTag             | feature_id[3].value <= threshold=54010.166015625    |
| node_114: feature_name=SARS.CoV.2.S1+S2                 | feature_id[12].value > threshold=47258.43359375     |
| node_240: feature_name=HuIgG_0.03                       | feature_id[5].value > threshold=5455.5              |
| node_266: feature_name=HuIgG_0.10                       | feature_id[1].value > threshold=24231.0             |
| node_284: feature_name=HuIgG_0.03                       | feature_id[5].value <= threshold=5469.0             |
| Class: healthcare workers 60–180 days after vaccination |                                                     |
|                                                         |                                                     |
| Rules_115                                               | passed counts:2                                     |
| node_0: feature_name=HuIgG_0.10                         | feature_id[1].value > threshold=19120.166015625     |
| node_112: feature_name=a-HuIgG_0.03                     | feature_id[8].value <= threshold=19665.666015625    |
| node_113: feature_name=SARS.CoV.2.S1.mFcTag             | feature_id[3].value <= threshold=54010.166015625    |
| node_114: feature_name=SARS.CoV.2.S1+S2                 | feature_id[12].value > threshold=47258.43359375     |
| node_240: feature_name=HuIgG_0.03                       | feature_id[5].value > threshold=5455.5              |
| node_266: feature_name=HuIgG_0.10                       | feature_id[1].value <= threshold=24231.0            |
| node_267: feature_name=hCoV.HKU1.NP                     | feature_id[10].value > threshold=2123.0000610351562 |
| node_271: feature_name=SARS.CoV.S1.HisTag               | feature_id[6].value > threshold=8281.83349609375    |
| node_273: feature_name=Flu.B_Phu/.HA1+HA2               | feature_id[11].value > threshold=51424.19921875     |
| node_275: feature_name=a-HuIgG_0.30                     | feature_id[4].value > threshold=41169.833984375     |
| node_277: feature_name=a-HuIgG_0.30                     | feature_id[4].value > threshold=42934.333984375     |
| node_279: feature_name=a-HuIgG_0.03                     | feature_id[8].value > threshold=17284.5             |
| Class: healthcare workers 60–180 days after vaccination |                                                     |
|                                                         |                                                     |
| Rules_116                                               | passed counts:2                                     |
| node_0: feature_name=HuIgG_0.10                         | feature_id[1].value > threshold=19120.166015625     |
| node_112: feature_name=a-HuIgG_0.03                     | feature_id[8].value <= threshold=19665.666015625    |

|                                                           |                                                      |
|-----------------------------------------------------------|------------------------------------------------------|
| node_113: feature_name=SARS.CoV.2.S1.mFcTag               | feature_id[3].value <= threshold=54010.166015625     |
| node_114: feature_name=SARS.CoV.2.S1+S2                   | feature_id[12].value > threshold=47258.43359375      |
| node_240: feature_name=HuIgG_0.03                         | feature_id[5].value > threshold=5455.5               |
| node_266: feature_name=HuIgG_0.10                         | feature_id[1].value <= threshold=24231.0             |
| node_267: feature_name=hCoV.HKU1.NP                       | feature_id[10].value <= threshold=2123.0000610351562 |
| node_268: feature_name=hCoV.NL63.S1_S2                    | feature_id[7].value <= threshold=25279.30859375      |
| Class: healthcare workers over 180 days after vaccination |                                                      |
|                                                           |                                                      |
| Rules_117                                                 | passed counts:2                                      |
| node_0: feature_name=HuIgG_0.10                           | feature_id[1].value > threshold=19120.166015625      |
| node_112: feature_name=a-HuIgG_0.03                       | feature_id[8].value <= threshold=19665.666015625     |
| node_113: feature_name=SARS.CoV.2.S1.mFcTag               | feature_id[3].value <= threshold=54010.166015625     |
| node_114: feature_name=SARS.CoV.2.S1+S2                   | feature_id[12].value <= threshold=47258.43359375     |
| node_115: feature_name=SARS.CoV.2.S1.RBD.mFc              | feature_id[0].value > threshold=301.73333740234375   |
| node_131: feature_name=a-HuIgG_0.03                       | feature_id[8].value > threshold=12099.83349609375    |
| node_183: feature_name=Flu.B_Phu/.HA1+HA2                 | feature_id[11].value > threshold=41918.533203125     |
| node_187: feature_name=SARS.CoV.2.Spike.RBD.rFc           | feature_id[9].value > threshold=27438.341796875      |
| node_197: feature_name=SARS.CoV.2.S2                      | feature_id[2].value <= threshold=35177.640625        |
| node_198: feature_name=hCoV.HKU1.NP                       | feature_id[10].value <= threshold=2645.916748046875  |
| node_199: feature_name=hCoV.HKU1.NP                       | feature_id[10].value > threshold=666.6666870117188   |
| node_203: feature_name=HuIgG_0.10                         | feature_id[1].value > threshold=24756.5              |
| node_205: feature_name=SARS.CoV.2.S1+S2                   | feature_id[12].value > threshold=44218.416015625     |
| node_207: feature_name=SARS.CoV.2.Spike.RBD.rFc           | feature_id[9].value > threshold=46720.900390625      |
| Class: healthcare workers 60–180 days after vaccination   |                                                      |
|                                                           |                                                      |

|                                                            |                                                     |
|------------------------------------------------------------|-----------------------------------------------------|
| Rules_118                                                  | passed counts:2                                     |
| node_0: feature_name=HuIgG_0.10                            | feature_id[1].value > threshold=19120.166015625     |
| node_112: feature_name=a-HuIgG_0.03                        | feature_id[8].value <= threshold=19665.666015625    |
| node_113: feature_name=SARS.CoV.2.S1.mFcTag                | feature_id[3].value <= threshold=54010.166015625    |
| node_114: feature_name=SARS.CoV.2.S1+S2                    | feature_id[12].value <= threshold=47258.43359375    |
| node_115: feature_name=SARS.CoV.2.S1.RBD.mFc               | feature_id[0].value > threshold=301.73333740234375  |
| node_131: feature_name=a-HuIgG_0.03                        | feature_id[8].value > threshold=12099.83349609375   |
| node_183: feature_name=Flu.B_Phu/.HA1+HA2                  | feature_id[11].value > threshold=41918.533203125    |
| node_187: feature_name=SARS.CoV.2.Spike.RBD.rFc            | feature_id[9].value > threshold=27438.341796875     |
| node_197: feature_name=SARS.CoV.2.S2                       | feature_id[2].value <= threshold=35177.640625       |
| node_198: feature_name=hCoV.HKU1.NP                        | feature_id[10].value <= threshold=2645.916748046875 |
| node_199: feature_name=hCoV.HKU1.NP                        | feature_id[10].value <= threshold=666.6666870117188 |
| node_200: feature_name=hCoV.HKU1.NP                        | feature_id[10].value > threshold=613.4166564941406  |
| Class: healthcare workers within 60 days after vaccination |                                                     |
|                                                            |                                                     |
| Rules_119                                                  | passed counts:2                                     |
| node_0: feature_name=HuIgG_0.10                            | feature_id[1].value > threshold=19120.166015625     |
| node_112: feature_name=a-HuIgG_0.03                        | feature_id[8].value <= threshold=19665.666015625    |
| node_113: feature_name=SARS.CoV.2.S1.mFcTag                | feature_id[3].value <= threshold=54010.166015625    |
| node_114: feature_name=SARS.CoV.2.S1+S2                    | feature_id[12].value <= threshold=47258.43359375    |
| node_115: feature_name=SARS.CoV.2.S1.RBD.mFc               | feature_id[0].value > threshold=301.73333740234375  |
| node_131: feature_name=a-HuIgG_0.03                        | feature_id[8].value > threshold=12099.83349609375   |
| node_183: feature_name=Flu.B_Phu/.HA1+HA2                  | feature_id[11].value > threshold=41918.533203125    |
| node_187: feature_name=SARS.CoV.2.Spike.RBD.rFc            | feature_id[9].value > threshold=27438.341796875     |
| node_197: feature_name=SARS.CoV.2.S2                       | feature_id[2].value <= threshold=35177.640625       |

|                                                           |                                                     |
|-----------------------------------------------------------|-----------------------------------------------------|
| node_198: feature_name=hCoV.HKU1.NP                       | feature_id[10].value <= threshold=2645.916748046875 |
| node_199: feature_name=hCoV.HKU1.NP                       | feature_id[10].value <= threshold=666.6666870117188 |
| node_200: feature_name=hCoV.HKU1.NP                       | feature_id[10].value <= threshold=613.4166564941406 |
| Class: healthcare workers over 180 days after vaccination |                                                     |
|                                                           |                                                     |
| Rules_120                                                 | passed counts:2                                     |
| node_0: feature_name=HuIgG_0.10                           | feature_id[1].value > threshold=19120.166015625     |
| node_112: feature_name=a-HuIgG_0.03                       | feature_id[8].value <= threshold=19665.666015625    |
| node_113: feature_name=SARS.CoV.2.S1.mFcTag               | feature_id[3].value <= threshold=54010.166015625    |
| node_114: feature_name=SARS.CoV.2.S1+S2                   | feature_id[12].value <= threshold=47258.43359375    |
| node_115: feature_name=SARS.CoV.2.S1.RBD.mFc              | feature_id[0].value > threshold=301.73333740234375  |
| node_131: feature_name=a-HuIgG_0.03                       | feature_id[8].value <= threshold=12099.83349609375  |
| node_132: feature_name=SARS.CoV.2.S2                      | feature_id[2].value > threshold=8858.0751953125     |
| node_134: feature_name=Flu.B_Phu/.HA1+HA2                 | feature_id[11].value <= threshold=53839.16796875    |
| node_135: feature_name=hCoV.HKU1.NP                       | feature_id[10].value > threshold=1010.1666564941406 |
| node_145: feature_name=hCoV.HKU1.NP                       | feature_id[10].value <= threshold=15374.16650390625 |
| node_146: feature_name=SARS.CoV.2.S1.mFcTag               | feature_id[3].value > threshold=50683.0             |
| node_168: feature_name=HuIgG_0.10                         | feature_id[1].value > threshold=20669.833984375     |
| node_170: feature_name=SARS.CoV.2.S1.mFcTag               | feature_id[3].value > threshold=50874.666015625     |
| node_172: feature_name=SARS.CoV.S1.HisTag                 | feature_id[6].value <= threshold=3796.25            |
| node_173: feature_name=a-HuIgG_0.03                       | feature_id[8].value > threshold=10618.0             |
| Class: healthcare workers 60–180 days after vaccination   |                                                     |
|                                                           |                                                     |
| Rules_121                                                 | passed counts:2                                     |
| node_0: feature_name=HuIgG_0.10                           | feature_id[1].value > threshold=19120.166015625     |



|                                                         |                                                      |
|---------------------------------------------------------|------------------------------------------------------|
| node_112: feature_name=a-HuIgG_0.03                     | feature_id[8].value <= threshold=19665.666015625     |
| node_113: feature_name=SARS.CoV.2.S1.mFcTag             | feature_id[3].value <= threshold=54010.166015625     |
| node_114: feature_name=SARS.CoV.2.S1+S2                 | feature_id[12].value <= threshold=47258.43359375     |
| node_115: feature_name=SARS.CoV.2.S1.RBD.mFc            | feature_id[0].value > threshold=301.73333740234375   |
| node_131: feature_name=a-HuIgG_0.03                     | feature_id[8].value <= threshold=12099.83349609375   |
| node_132: feature_name=SARS.CoV.2.S2                    | feature_id[2].value > threshold=8858.0751953125      |
| node_134: feature_name=Flu.B_Phu/.HA1+HA2               | feature_id[11].value <= threshold=53839.16796875     |
| node_135: feature_name=hCoV.HKU1.NP                     | feature_id[10].value > threshold=1010.1666564941406  |
| node_145: feature_name=hCoV.HKU1.NP                     | feature_id[10].value <= threshold=15374.16650390625  |
| node_146: feature_name=SARS.CoV.2.S1.mFcTag             | feature_id[3].value <= threshold=50683.0             |
| node_147: feature_name=SARS.CoV.2.Spike.RBD.rFc         | feature_id[9].value <= threshold=45822.583984375     |
| node_148: feature_name=SARS.CoV.2.S2                    | feature_id[2].value > threshold=10212.125            |
| node_154: feature_name=Flu.B_Phu/.HA1+HA2               | feature_id[11].value <= threshold=49488.1171875      |
| node_155: feature_name=MoIgA_0.10                       | feature_id[13].value <= threshold=177.66666412353516 |
| Class: healthcare workers 60–180 days after vaccination |                                                      |
|                                                         |                                                      |
| Rules_122                                               | passed counts:2                                      |
| node_0: feature_name=HuIgG_0.10                         | feature_id[1].value > threshold=19120.166015625      |
| node_112: feature_name=a-HuIgG_0.03                     | feature_id[8].value <= threshold=19665.666015625     |
| node_113: feature_name=SARS.CoV.2.S1.mFcTag             | feature_id[3].value <= threshold=54010.166015625     |
| node_114: feature_name=SARS.CoV.2.S1+S2                 | feature_id[12].value <= threshold=47258.43359375     |
| node_115: feature_name=SARS.CoV.2.S1.RBD.mFc            | feature_id[0].value > threshold=301.73333740234375   |
| node_131: feature_name=a-HuIgG_0.03                     | feature_id[8].value <= threshold=12099.83349609375   |
| node_132: feature_name=SARS.CoV.2.S2                    | feature_id[2].value > threshold=8858.0751953125      |
| node_134: feature_name=Flu.B_Phu/.HA1+HA2               | feature_id[11].value <= threshold=53839.16796875     |

|                                                            |                                                     |
|------------------------------------------------------------|-----------------------------------------------------|
| node_135: feature_name=hCoV.HKU1.NP                        | feature_id[10].value > threshold=1010.1666564941406 |
| node_145: feature_name=hCoV.HKU1.NP                        | feature_id[10].value <= threshold=15374.16650390625 |
| node_146: feature_name=SARS.CoV.2.S1.mFcTag                | feature_id[3].value <= threshold=50683.0            |
| node_147: feature_name=SARS.CoV.2.Spike.RBD.rFc            | feature_id[9].value <= threshold=45822.583984375    |
| node_148: feature_name=SARS.CoV.2.S2                       | feature_id[2].value <= threshold=10212.125          |
| node_149: feature_name=HuIgG_0.03                          | feature_id[5].value > threshold=4160.666748046875   |
| node_151: feature_name=SARS.CoV.2.Spike.RBD.rFc            | feature_id[9].value > threshold=20605.1162109375    |
| Class: healthcare workers 60–180 days after vaccination    |                                                     |
|                                                            |                                                     |
| Rules_123                                                  | passed counts:2                                     |
| node_0: feature_name=HuIgG_0.10                            | feature_id[1].value > threshold=19120.166015625     |
| node_112: feature_name=a-HuIgG_0.03                        | feature_id[8].value <= threshold=19665.666015625    |
| node_113: feature_name=SARS.CoV.2.S1.mFcTag                | feature_id[3].value <= threshold=54010.166015625    |
| node_114: feature_name=SARS.CoV.2.S1+S2                    | feature_id[12].value <= threshold=47258.43359375    |
| node_115: feature_name=SARS.CoV.2.S1.RBD.mFc               | feature_id[0].value > threshold=301.73333740234375  |
| node_131: feature_name=a-HuIgG_0.03                        | feature_id[8].value <= threshold=12099.83349609375  |
| node_132: feature_name=SARS.CoV.2.S2                       | feature_id[2].value > threshold=8858.0751953125     |
| node_134: feature_name=Flu.B_Phu/.HA1+HA2                  | feature_id[11].value <= threshold=53839.16796875    |
| node_135: feature_name=hCoV.HKU1.NP                        | feature_id[10].value > threshold=1010.1666564941406 |
| node_145: feature_name=hCoV.HKU1.NP                        | feature_id[10].value <= threshold=15374.16650390625 |
| node_146: feature_name=SARS.CoV.2.S1.mFcTag                | feature_id[3].value <= threshold=50683.0            |
| node_147: feature_name=SARS.CoV.2.Spike.RBD.rFc            | feature_id[9].value <= threshold=45822.583984375    |
| node_148: feature_name=SARS.CoV.2.S2                       | feature_id[2].value <= threshold=10212.125          |
| node_149: feature_name=HuIgG_0.03                          | feature_id[5].value <= threshold=4160.666748046875  |
| Class: healthcare workers within 60 days after vaccination |                                                     |

|                                                            |                                                     |
|------------------------------------------------------------|-----------------------------------------------------|
| Rules_124                                                  | passed counts:2                                     |
| node_0: feature_name=HuIgG_0.10                            | feature_id[1].value > threshold=19120.166015625     |
| node_112: feature_name=a-HuIgG_0.03                        | feature_id[8].value <= threshold=19665.666015625    |
| node_113: feature_name=SARS.CoV.2.S1.mFcTag                | feature_id[3].value <= threshold=54010.166015625    |
| node_114: feature_name=SARS.CoV.2.S1+S2                    | feature_id[12].value <= threshold=47258.43359375    |
| node_115: feature_name=SARS.CoV.2.S1.RBD.mFc               | feature_id[0].value <= threshold=301.73333740234375 |
| node_116: feature_name=SARS.CoV.2.S1+S2                    | feature_id[12].value > threshold=3298.25            |
| node_122: feature_name=SARS.CoV.2.S1.mFcTag                | feature_id[3].value > threshold=-1493.1666870117188 |
| node_124: feature_name=hCoV.HKU1.NP                        | feature_id[10].value > threshold=11908.138671875    |
| Class: healthcare workers within 60 days after vaccination |                                                     |
| Rules_125                                                  | passed counts:2                                     |
| node_0: feature_name=HuIgG_0.10                            | feature_id[1].value > threshold=19120.166015625     |
| node_112: feature_name=a-HuIgG_0.03                        | feature_id[8].value <= threshold=19665.666015625    |
| node_113: feature_name=SARS.CoV.2.S1.mFcTag                | feature_id[3].value <= threshold=54010.166015625    |
| node_114: feature_name=SARS.CoV.2.S1+S2                    | feature_id[12].value <= threshold=47258.43359375    |
| node_115: feature_name=SARS.CoV.2.S1.RBD.mFc               | feature_id[0].value <= threshold=301.73333740234375 |
| node_116: feature_name=SARS.CoV.2.S1+S2                    | feature_id[12].value > threshold=3298.25            |
| node_122: feature_name=SARS.CoV.2.S1.mFcTag                | feature_id[3].value > threshold=-1493.1666870117188 |
| node_124: feature_name=hCoV.HKU1.NP                        | feature_id[10].value <= threshold=11908.138671875   |
| node_125: feature_name=SARS.CoV.2.S1.RBD.mFc               | feature_id[0].value > threshold=82.01666641235352   |
| node_127: feature_name=a-HuIgG_0.30                        | feature_id[4].value <= threshold=39543.0            |
| Class: healthcare workers within 60 days after vaccination |                                                     |
|                                                            |                                                     |

|                                                            |                                                      |
|------------------------------------------------------------|------------------------------------------------------|
| Rules_126                                                  | passed counts:2                                      |
| node_0: feature_name=HuIgG_0.10                            | feature_id[1].value > threshold=19120.166015625      |
| node_112: feature_name=a-HuIgG_0.03                        | feature_id[8].value <= threshold=19665.666015625     |
| node_113: feature_name=SARS.CoV.2.S1.mFcTag                | feature_id[3].value <= threshold=54010.166015625     |
| node_114: feature_name=SARS.CoV.2.S1+S2                    | feature_id[12].value <= threshold=47258.43359375     |
| node_115: feature_name=SARS.CoV.2.S1.RBD.mFc               | feature_id[0].value <= threshold=301.73333740234375  |
| node_116: feature_name=SARS.CoV.2.S1+S2                    | feature_id[12].value > threshold=3298.25             |
| node_122: feature_name=SARS.CoV.2.S1.mFcTag                | feature_id[3].value <= threshold=-1493.1666870117188 |
| Class: healthcare workers within 60 days after vaccination |                                                      |
|                                                            |                                                      |
| Rules_127                                                  | passed counts:2                                      |
| node_0: feature_name=HuIgG_0.10                            | feature_id[1].value <= threshold=19120.166015625     |
| node_1: feature_name=SARS.CoV.2.S1.mFcTag                  | feature_id[3].value > threshold=5354.388916015625    |
| node_9: feature_name=a-HuIgG_0.30                          | feature_id[4].value > threshold=33726.833984375      |
| node_55: feature_name=SARS.CoV.2.S1.mFcTag                 | feature_id[3].value > threshold=43185.68359375       |
| node_67: feature_name=a-HuIgG_0.03                         | feature_id[8].value <= threshold=10858.0             |
| node_68: feature_name=MoIgA_0.10                           | feature_id[13].value > threshold=246.83333587646484  |
| node_76: feature_name=SARS.CoV.2.Spike.RBD.rFc             | feature_id[9].value <= threshold=54060.41796875      |
| node_77: feature_name=a-HuIgG_0.03                         | feature_id[8].value > threshold=10179.0              |
| node_79: feature_name=hCoV.HKU1.NP                         | feature_id[10].value <= threshold=2203.3333129882812 |
| Class: healthcare workers 60–180 days after vaccination    |                                                      |
|                                                            |                                                      |
| Rules_128                                                  | passed counts:2                                      |
| node_0: feature_name=HuIgG_0.10                            | feature_id[1].value <= threshold=19120.166015625     |
| node_1: feature_name=SARS.CoV.2.S1.mFcTag                  | feature_id[3].value > threshold=5354.388916015625    |

|                                                            |                                                      |
|------------------------------------------------------------|------------------------------------------------------|
| node_9: feature_name=a-HuIgG_0.30                          | feature_id[4].value > threshold=33726.833984375      |
| node_55: feature_name=SARS.CoV.2.S1.mFcTag                 | feature_id[3].value > threshold=43185.68359375       |
| node_67: feature_name=a-HuIgG_0.03                         | feature_id[8].value <= threshold=10858.0             |
| node_68: feature_name=MoIgA_0.10                           | feature_id[13].value <= threshold=246.83333587646484 |
| node_69: feature_name=hCoV.HKU1.NP                         | feature_id[10].value <= threshold=1960.7500610351562 |
| node_70: feature_name=hCoV.HKU1.NP                         | feature_id[10].value > threshold=1023.75             |
| Class: healthcare workers within 60 days after vaccination |                                                      |
|                                                            |                                                      |
| Rules_129                                                  | passed counts:2                                      |
| node_0: feature_name=HuIgG_0.10                            | feature_id[1].value <= threshold=19120.166015625     |
| node_1: feature_name=SARS.CoV.2.S1.mFcTag                  | feature_id[3].value > threshold=5354.388916015625    |
| node_9: feature_name=a-HuIgG_0.30                          | feature_id[4].value <= threshold=33726.833984375     |
| node_10: feature_name=HuIgG_0.03                           | feature_id[5].value > threshold=1023.1666564941406   |
| node_20: feature_name=hCoV.HKU1.NP                         | feature_id[10].value > threshold=-20.05833387374878  |
| node_22: feature_name=SARS.CoV.S1.HisTag                   | feature_id[6].value > threshold=400.3000030517578    |
| node_26: feature_name=SARS.CoV.S1.HisTag                   | feature_id[6].value > threshold=15087.41650390625    |
| node_38: feature_name=hCoV.HKU1.NP                         | feature_id[10].value > threshold=348.6666564941406   |
| node_46: feature_name=SARS.CoV.2.S2                        | feature_id[2].value <= threshold=21127.650390625     |
| node_47: feature_name=SARS.CoV.2.Spike.RBD.rFc             | feature_id[9].value > threshold=38684.56640625       |
| Class: healthcare workers over 180 days after vaccination  |                                                      |
|                                                            |                                                      |
| Rules_130                                                  | passed counts:2                                      |
| node_0: feature_name=HuIgG_0.10                            | feature_id[1].value <= threshold=19120.166015625     |
| node_1: feature_name=SARS.CoV.2.S1.mFcTag                  | feature_id[3].value > threshold=5354.388916015625    |
| node_9: feature_name=a-HuIgG_0.30                          | feature_id[4].value <= threshold=33726.833984375     |

|                                                         |                                                      |
|---------------------------------------------------------|------------------------------------------------------|
| node_10: feature_name=HuIgG_0.03                        | feature_id[5].value > threshold=1023.1666564941406   |
| node_20: feature_name=hCoV.HKU1.NP                      | feature_id[10].value > threshold=-20.05833387374878  |
| node_22: feature_name=SARS.CoV.S1.HisTag                | feature_id[6].value > threshold=400.3000030517578    |
| node_26: feature_name=SARS.CoV.S1.HisTag                | feature_id[6].value > threshold=15087.41650390625    |
| node_38: feature_name=hCoV.HKU1.NP                      | feature_id[10].value <= threshold=348.6666564941406  |
| node_39: feature_name=hCoV.NL63.S1_S2                   | feature_id[7].value <= threshold=26557.333984375     |
| node_40: feature_name=SARS.CoV.S1.HisTag                | feature_id[6].value <= threshold=25028.0             |
| Class: healthcare workers 60–180 days after vaccination |                                                      |
|                                                         |                                                      |
| Rules_131                                               | passed counts:2                                      |
| node_0: feature_name=HuIgG_0.10                         | feature_id[1].value <= threshold=19120.166015625     |
| node_1: feature_name=SARS.CoV.2.S1.mFcTag               | feature_id[3].value > threshold=5354.388916015625    |
| node_9: feature_name=a-HuIgG_0.30                       | feature_id[4].value <= threshold=33726.833984375     |
| node_10: feature_name=HuIgG_0.03                        | feature_id[5].value > threshold=1023.1666564941406   |
| node_20: feature_name=hCoV.HKU1.NP                      | feature_id[10].value > threshold=-20.05833387374878  |
| node_22: feature_name=SARS.CoV.S1.HisTag                | feature_id[6].value <= threshold=400.3000030517578   |
| node_23: feature_name=hCoV.NL63.S1_S2                   | feature_id[7].value > threshold=25709.0419921875     |
| Class: unvaccinated healthcare workers                  |                                                      |
|                                                         |                                                      |
| Rules_132                                               | passed counts:2                                      |
| node_0: feature_name=HuIgG_0.10                         | feature_id[1].value <= threshold=19120.166015625     |
| node_1: feature_name=SARS.CoV.2.S1.mFcTag               | feature_id[3].value > threshold=5354.388916015625    |
| node_9: feature_name=a-HuIgG_0.30                       | feature_id[4].value <= threshold=33726.833984375     |
| node_10: feature_name=HuIgG_0.03                        | feature_id[5].value > threshold=1023.1666564941406   |
| node_20: feature_name=hCoV.HKU1.NP                      | feature_id[10].value <= threshold=-20.05833387374878 |

|                                                            |                                                   |
|------------------------------------------------------------|---------------------------------------------------|
| Class: healthcare workers over 180 days after vaccination  |                                                   |
|                                                            |                                                   |
| Rules_133                                                  | passed counts:1                                   |
| node_0: feature_name=HuIgG_0.10                            | feature_id[1].value > threshold=19120.166015625   |
| node_112: feature_name=a-HuIgG_0.03                        | feature_id[8].value > threshold=19665.666015625   |
| node_428: feature_name=SARS.CoV.2.Spike.RBD.rFc            | feature_id[9].value <= threshold=55147.1484375    |
| node_429: feature_name=a-HuIgG_0.30                        | feature_id[4].value > threshold=51289.166015625   |
| node_437: feature_name=HuIgG_0.10                          | feature_id[1].value <= threshold=25959.0          |
| node_438: feature_name=HuIgG_0.03                          | feature_id[5].value > threshold=7564.833251953125 |
| Class: healthcare workers 60–180 days after vaccination    |                                                   |
|                                                            |                                                   |
| Rules_134                                                  | passed counts:1                                   |
| node_0: feature_name=HuIgG_0.10                            | feature_id[1].value > threshold=19120.166015625   |
| node_112: feature_name=a-HuIgG_0.03                        | feature_id[8].value > threshold=19665.666015625   |
| node_428: feature_name=SARS.CoV.2.Spike.RBD.rFc            | feature_id[9].value <= threshold=55147.1484375    |
| node_429: feature_name=a-HuIgG_0.30                        | feature_id[4].value <= threshold=51289.166015625  |
| node_430: feature_name=Flu.B_Phu/.HA1+HA2                  | feature_id[11].value > threshold=48173.93359375   |
| node_434: feature_name=a-HuIgG_0.30                        | feature_id[4].value <= threshold=47010.66796875   |
| Class: healthcare workers within 60 days after vaccination |                                                   |
|                                                            |                                                   |
| Rules_135                                                  | passed counts:1                                   |
| node_0: feature_name=HuIgG_0.10                            | feature_id[1].value > threshold=19120.166015625   |
| node_112: feature_name=a-HuIgG_0.03                        | feature_id[8].value > threshold=19665.666015625   |
| node_428: feature_name=SARS.CoV.2.Spike.RBD.rFc            | feature_id[9].value <= threshold=55147.1484375    |
| node_429: feature_name=a-HuIgG_0.30                        | feature_id[4].value <= threshold=51289.166015625  |

|                                                            |                                                  |
|------------------------------------------------------------|--------------------------------------------------|
| node_430: feature_name=Flu.B_Phu/.HA1+HA2                  | feature_id[11].value <= threshold=48173.93359375 |
| node_431: feature_name=SARS.CoV.2.S1+S2                    | feature_id[12].value <= threshold=39605.06640625 |
| Class: healthcare workers 60–180 days after vaccination    |                                                  |
|                                                            |                                                  |
| Rules_136                                                  | passed counts:1                                  |
| node_0: feature_name=HuIgG_0.10                            | feature_id[1].value > threshold=19120.166015625  |
| node_112: feature_name=a-HuIgG_0.03                        | feature_id[8].value <= threshold=19665.666015625 |
| node_113: feature_name=SARS.CoV.2.S1.mFcTag                | feature_id[3].value > threshold=54010.166015625  |
| node_351: feature_name=SARS.CoV.2.S2                       | feature_id[2].value > threshold=37075.75         |
| node_391: feature_name=SARS.CoV.2.S1.mFcTag                | feature_id[3].value > threshold=55462.833984375  |
| node_425: feature_name=hCoV.NL63.S1_S2                     | feature_id[7].value <= threshold=29337.0         |
| Class: healthcare workers within 60 days after vaccination |                                                  |
|                                                            |                                                  |
| Rules_137                                                  | passed counts:1                                  |
| node_0: feature_name=HuIgG_0.10                            | feature_id[1].value > threshold=19120.166015625  |
| node_112: feature_name=a-HuIgG_0.03                        | feature_id[8].value <= threshold=19665.666015625 |
| node_113: feature_name=SARS.CoV.2.S1.mFcTag                | feature_id[3].value > threshold=54010.166015625  |
| node_351: feature_name=SARS.CoV.2.S2                       | feature_id[2].value > threshold=37075.75         |
| node_391: feature_name=SARS.CoV.2.S1.mFcTag                | feature_id[3].value <= threshold=55462.833984375 |
| node_392: feature_name=SARS.CoV.2.S1.mFcTag                | feature_id[3].value > threshold=55163.634765625  |
| node_420: feature_name=SARS.CoV.2.S1+S2                    | feature_id[12].value > threshold=54621.0         |
| node_422: feature_name=SARS.CoV.2.Spike.RBD.rFc            | feature_id[9].value > threshold=51908.0          |
| Class: healthcare workers within 60 days after vaccination |                                                  |
|                                                            |                                                  |
| Rules_138                                                  | passed counts:1                                  |



|                                                         |                                                    |
|---------------------------------------------------------|----------------------------------------------------|
| node_0: feature_name=HuIgG_0.10                         | feature_id[1].value > threshold=19120.166015625    |
| node_112: feature_name=a-HuIgG_0.03                     | feature_id[8].value <= threshold=19665.666015625   |
| node_113: feature_name=SARS.CoV.2.S1.mFcTag             | feature_id[3].value > threshold=54010.166015625    |
| node_351: feature_name=SARS.CoV.2.S2                    | feature_id[2].value > threshold=37075.75           |
| node_391: feature_name=SARS.CoV.2.S1.mFcTag             | feature_id[3].value <= threshold=55462.833984375   |
| node_392: feature_name=SARS.CoV.2.S1.mFcTag             | feature_id[3].value > threshold=55163.634765625    |
| node_420: feature_name=SARS.CoV.2.S1+S2                 | feature_id[12].value > threshold=54621.0           |
| node_422: feature_name=SARS.CoV.2.Spike.RBD.rFc         | feature_id[9].value <= threshold=51908.0           |
| Class: healthcare workers 60–180 days after vaccination |                                                    |
|                                                         |                                                    |
| Rules_139                                               | passed counts:1                                    |
| node_0: feature_name=HuIgG_0.10                         | feature_id[1].value > threshold=19120.166015625    |
| node_112: feature_name=a-HuIgG_0.03                     | feature_id[8].value <= threshold=19665.666015625   |
| node_113: feature_name=SARS.CoV.2.S1.mFcTag             | feature_id[3].value > threshold=54010.166015625    |
| node_351: feature_name=SARS.CoV.2.S2                    | feature_id[2].value > threshold=37075.75           |
| node_391: feature_name=SARS.CoV.2.S1.mFcTag             | feature_id[3].value <= threshold=55462.833984375   |
| node_392: feature_name=SARS.CoV.2.S1.mFcTag             | feature_id[3].value <= threshold=55163.634765625   |
| node_393: feature_name=hCoV.HKU1.NP                     | feature_id[10].value <= threshold=14561.3330078125 |
| node_394: feature_name=hCoV.HKU1.NP                     | feature_id[10].value > threshold=6453.333251953125 |
| node_412: feature_name=HuIgG_0.03                       | feature_id[5].value > threshold=4766.166748046875  |
| node_414: feature_name=MoIgA_0.10                       | feature_id[13].value > threshold=2918.0            |
| node_416: feature_name=HuIgG_0.03                       | feature_id[5].value > threshold=6174.0             |
| Class: healthcare workers 60–180 days after vaccination |                                                    |
|                                                         |                                                    |
| Rules_140                                               | passed counts:1                                    |

|                                                         |                                                      |
|---------------------------------------------------------|------------------------------------------------------|
| node_0: feature_name=HuIgG_0.10                         | feature_id[1].value > threshold=19120.166015625      |
| node_112: feature_name=a-HuIgG_0.03                     | feature_id[8].value <= threshold=19665.666015625     |
| node_113: feature_name=SARS.CoV.2.S1.mFcTag             | feature_id[3].value > threshold=54010.166015625      |
| node_351: feature_name=SARS.CoV.2.S2                    | feature_id[2].value > threshold=37075.75             |
| node_391: feature_name=SARS.CoV.2.S1.mFcTag             | feature_id[3].value <= threshold=55462.833984375     |
| node_392: feature_name=SARS.CoV.2.S1.mFcTag             | feature_id[3].value <= threshold=55163.634765625     |
| node_393: feature_name=hCoV.HKU1.NP                     | feature_id[10].value <= threshold=14561.3330078125   |
| node_394: feature_name=hCoV.HKU1.NP                     | feature_id[10].value <= threshold=6453.333251953125  |
| node_395: feature_name=hCoV.HKU1.NP                     | feature_id[10].value > threshold=1990.1666259765625  |
| node_407: feature_name=SARS.CoV.2.S1.RBD.mFc            | feature_id[0].value > threshold=48385.75             |
| node_409: feature_name=MoIgA_0.10                       | feature_id[13].value > threshold=21414.99951171875   |
| Class: healthcare workers 60–180 days after vaccination |                                                      |
|                                                         |                                                      |
| Rules_141                                               | passed counts:1                                      |
| node_0: feature_name=HuIgG_0.10                         | feature_id[1].value > threshold=19120.166015625      |
| node_112: feature_name=a-HuIgG_0.03                     | feature_id[8].value <= threshold=19665.666015625     |
| node_113: feature_name=SARS.CoV.2.S1.mFcTag             | feature_id[3].value > threshold=54010.166015625      |
| node_351: feature_name=SARS.CoV.2.S2                    | feature_id[2].value > threshold=37075.75             |
| node_391: feature_name=SARS.CoV.2.S1.mFcTag             | feature_id[3].value <= threshold=55462.833984375     |
| node_392: feature_name=SARS.CoV.2.S1.mFcTag             | feature_id[3].value <= threshold=55163.634765625     |
| node_393: feature_name=hCoV.HKU1.NP                     | feature_id[10].value <= threshold=14561.3330078125   |
| node_394: feature_name=hCoV.HKU1.NP                     | feature_id[10].value <= threshold=6453.333251953125  |
| node_395: feature_name=hCoV.HKU1.NP                     | feature_id[10].value <= threshold=1990.1666259765625 |
| node_396: feature_name=SARS.CoV.S1.HisTag               | feature_id[6].value > threshold=12607.2998046875     |
| node_398: feature_name=a-HuIgG_0.03                     | feature_id[8].value > threshold=15419.83349609375    |

|                                                           |                                                      |
|-----------------------------------------------------------|------------------------------------------------------|
| node_404: feature_name=SARS.CoV.2.S1.RBD.mFc              | feature_id[0].value > threshold=52143.06640625       |
| Class: healthcare workers over 180 days after vaccination |                                                      |
|                                                           |                                                      |
| Rules_142                                                 | passed counts:1                                      |
| node_0: feature_name=HuIgG_0.10                           | feature_id[1].value > threshold=19120.166015625      |
| node_112: feature_name=a-HuIgG_0.03                       | feature_id[8].value <= threshold=19665.666015625     |
| node_113: feature_name=SARS.CoV.2.S1.mFcTag               | feature_id[3].value > threshold=54010.166015625      |
| node_351: feature_name=SARS.CoV.2.S2                      | feature_id[2].value > threshold=37075.75             |
| node_391: feature_name=SARS.CoV.2.S1.mFcTag               | feature_id[3].value <= threshold=55462.833984375     |
| node_392: feature_name=SARS.CoV.2.S1.mFcTag               | feature_id[3].value <= threshold=55163.634765625     |
| node_393: feature_name=hCoV.HKU1.NP                       | feature_id[10].value <= threshold=14561.3330078125   |
| node_394: feature_name=hCoV.HKU1.NP                       | feature_id[10].value <= threshold=6453.333251953125  |
| node_395: feature_name=hCoV.HKU1.NP                       | feature_id[10].value <= threshold=1990.1666259765625 |
| node_396: feature_name=SARS.CoV.S1.HisTag                 | feature_id[6].value > threshold=12607.2998046875     |
| node_398: feature_name=a-HuIgG_0.03                       | feature_id[8].value > threshold=15419.83349609375    |
| node_404: feature_name=SARS.CoV.2.S1.RBD.mFc              | feature_id[0].value <= threshold=52143.06640625      |
| Class: unvaccinated healthcare workers                    |                                                      |
|                                                           |                                                      |
| Rules_143                                                 | passed counts:1                                      |
| node_0: feature_name=HuIgG_0.10                           | feature_id[1].value > threshold=19120.166015625      |
| node_112: feature_name=a-HuIgG_0.03                       | feature_id[8].value <= threshold=19665.666015625     |
| node_113: feature_name=SARS.CoV.2.S1.mFcTag               | feature_id[3].value > threshold=54010.166015625      |
| node_351: feature_name=SARS.CoV.2.S2                      | feature_id[2].value > threshold=37075.75             |
| node_391: feature_name=SARS.CoV.2.S1.mFcTag               | feature_id[3].value <= threshold=55462.833984375     |
| node_392: feature_name=SARS.CoV.2.S1.mFcTag               | feature_id[3].value <= threshold=55163.634765625     |

|                                                            |                                                      |
|------------------------------------------------------------|------------------------------------------------------|
| node_393: feature_name=hCoV.HKU1.NP                        | feature_id[10].value <= threshold=14561.3330078125   |
| node_394: feature_name=hCoV.HKU1.NP                        | feature_id[10].value <= threshold=6453.333251953125  |
| node_395: feature_name=hCoV.HKU1.NP                        | feature_id[10].value <= threshold=1990.1666259765625 |
| node_396: feature_name=SARS.CoV.S1.HisTag                  | feature_id[6].value > threshold=12607.2998046875     |
| node_398: feature_name=a-HuIgG_0.03                        | feature_id[8].value <= threshold=15419.83349609375   |
| node_399: feature_name=SARS.CoV.2.S1.mFcTag                | feature_id[3].value > threshold=55018.716796875      |
| node_401: feature_name=hCoV.NL63.S1_S2                     | feature_id[7].value > threshold=31181.3837890625     |
| Class: healthcare workers within 60 days after vaccination |                                                      |
|                                                            |                                                      |
| Rules_144                                                  | passed counts:1                                      |
| node_0: feature_name=HuIgG_0.10                            | feature_id[1].value > threshold=19120.166015625      |
| node_112: feature_name=a-HuIgG_0.03                        | feature_id[8].value <= threshold=19665.666015625     |
| node_113: feature_name=SARS.CoV.2.S1.mFcTag                | feature_id[3].value > threshold=54010.166015625      |
| node_351: feature_name=SARS.CoV.2.S2                       | feature_id[2].value > threshold=37075.75             |
| node_391: feature_name=SARS.CoV.2.S1.mFcTag                | feature_id[3].value <= threshold=55462.833984375     |
| node_392: feature_name=SARS.CoV.2.S1.mFcTag                | feature_id[3].value <= threshold=55163.634765625     |
| node_393: feature_name=hCoV.HKU1.NP                        | feature_id[10].value <= threshold=14561.3330078125   |
| node_394: feature_name=hCoV.HKU1.NP                        | feature_id[10].value <= threshold=6453.333251953125  |
| node_395: feature_name=hCoV.HKU1.NP                        | feature_id[10].value <= threshold=1990.1666259765625 |
| node_396: feature_name=SARS.CoV.S1.HisTag                  | feature_id[6].value > threshold=12607.2998046875     |
| node_398: feature_name=a-HuIgG_0.03                        | feature_id[8].value <= threshold=15419.83349609375   |
| node_399: feature_name=SARS.CoV.2.S1.mFcTag                | feature_id[3].value > threshold=55018.716796875      |
| node_401: feature_name=hCoV.NL63.S1_S2                     | feature_id[7].value <= threshold=31181.3837890625    |
| Class: healthcare workers 60–180 days after vaccination    |                                                      |
|                                                            |                                                      |

|                                                            |                                                      |
|------------------------------------------------------------|------------------------------------------------------|
| Rules_145                                                  | passed counts:1                                      |
| node_0: feature_name=HuIgG_0.10                            | feature_id[1].value > threshold=19120.166015625      |
| node_112: feature_name=a-HuIgG_0.03                        | feature_id[8].value <= threshold=19665.666015625     |
| node_113: feature_name=SARS.CoV.2.S1.mFcTag                | feature_id[3].value > threshold=54010.166015625      |
| node_351: feature_name=SARS.CoV.2.S2                       | feature_id[2].value <= threshold=37075.75            |
| node_352: feature_name=a-HuIgG_0.03                        | feature_id[8].value > threshold=17721.1669921875     |
| node_386: feature_name=hCoV.HKU1.NP                        | feature_id[10].value <= threshold=4175.4998779296875 |
| node_387: feature_name=hCoV.HKU1.NP                        | feature_id[10].value > threshold=3016.9666748046875  |
| Class: unvaccinated healthcare workers                     |                                                      |
|                                                            |                                                      |
| Rules_146                                                  | passed counts:1                                      |
| node_0: feature_name=HuIgG_0.10                            | feature_id[1].value > threshold=19120.166015625      |
| node_112: feature_name=a-HuIgG_0.03                        | feature_id[8].value <= threshold=19665.666015625     |
| node_113: feature_name=SARS.CoV.2.S1.mFcTag                | feature_id[3].value > threshold=54010.166015625      |
| node_351: feature_name=SARS.CoV.2.S2                       | feature_id[2].value <= threshold=37075.75            |
| node_352: feature_name=a-HuIgG_0.03                        | feature_id[8].value <= threshold=17721.1669921875    |
| node_353: feature_name=MoIgA_0.10                          | feature_id[13].value > threshold=536.0               |
| node_367: feature_name=HuIgG_0.03                          | feature_id[5].value > threshold=5634.333251953125    |
| node_381: feature_name=MoIgA_0.10                          | feature_id[13].value > threshold=15050.5             |
| node_383: feature_name=SARS.CoV.2.Spike.RBD.rFc            | feature_id[9].value > threshold=50235.5              |
| Class: healthcare workers within 60 days after vaccination |                                                      |
|                                                            |                                                      |
| Rules_147                                                  | passed counts:1                                      |
| node_0: feature_name=HuIgG_0.10                            | feature_id[1].value > threshold=19120.166015625      |
| node_112: feature_name=a-HuIgG_0.03                        | feature_id[8].value <= threshold=19665.666015625     |

|                                                         |                                                    |
|---------------------------------------------------------|----------------------------------------------------|
| node_113: feature_name=SARS.CoV.2.S1.mFcTag             | feature_id[3].value > threshold=54010.166015625    |
| node_351: feature_name=SARS.CoV.2.S2                    | feature_id[2].value <= threshold=37075.75          |
| node_352: feature_name=a-HuIgG_0.03                     | feature_id[8].value <= threshold=17721.1669921875  |
| node_353: feature_name=MoIgA_0.10                       | feature_id[13].value > threshold=536.0             |
| node_367: feature_name=HuIgG_0.03                       | feature_id[5].value > threshold=5634.333251953125  |
| node_381: feature_name=MoIgA_0.10                       | feature_id[13].value > threshold=15050.5           |
| node_383: feature_name=SARS.CoV.2.Spike.RBD.rFc         | feature_id[9].value <= threshold=50235.5           |
| Class: healthcare workers 60–180 days after vaccination |                                                    |
|                                                         |                                                    |
| Rules_148                                               | passed counts:1                                    |
| node_0: feature_name=HuIgG_0.10                         | feature_id[1].value > threshold=19120.166015625    |
| node_112: feature_name=a-HuIgG_0.03                     | feature_id[8].value <= threshold=19665.666015625   |
| node_113: feature_name=SARS.CoV.2.S1.mFcTag             | feature_id[3].value > threshold=54010.166015625    |
| node_351: feature_name=SARS.CoV.2.S2                    | feature_id[2].value <= threshold=37075.75          |
| node_352: feature_name=a-HuIgG_0.03                     | feature_id[8].value <= threshold=17721.1669921875  |
| node_353: feature_name=MoIgA_0.10                       | feature_id[13].value > threshold=536.0             |
| node_367: feature_name=HuIgG_0.03                       | feature_id[5].value <= threshold=5634.333251953125 |
| node_368: feature_name=SARS.CoV.2.S1+S2                 | feature_id[12].value > threshold=52432.75          |
| node_378: feature_name=a-HuIgG_0.30                     | feature_id[4].value > threshold=49923.66796875     |
| Class: healthcare workers 60–180 days after vaccination |                                                    |
|                                                         |                                                    |
| Rules_149                                               | passed counts:1                                    |
| node_0: feature_name=HuIgG_0.10                         | feature_id[1].value > threshold=19120.166015625    |
| node_112: feature_name=a-HuIgG_0.03                     | feature_id[8].value <= threshold=19665.666015625   |
| node_113: feature_name=SARS.CoV.2.S1.mFcTag             | feature_id[3].value > threshold=54010.166015625    |

|                                                            |                                                    |
|------------------------------------------------------------|----------------------------------------------------|
| node_351: feature_name=SARS.CoV.2.S2                       | feature_id[2].value <= threshold=37075.75          |
| node_352: feature_name=a-HuIgG_0.03                        | feature_id[8].value <= threshold=17721.1669921875  |
| node_353: feature_name=MoIgA_0.10                          | feature_id[13].value > threshold=536.0             |
| node_367: feature_name=HuIgG_0.03                          | feature_id[5].value <= threshold=5634.333251953125 |
| node_368: feature_name=SARS.CoV.2.S1+S2                    | feature_id[12].value <= threshold=52432.75         |
| node_369: feature_name=SARS.CoV.S1.HisTag                  | feature_id[6].value <= threshold=17773.60009765625 |
| node_370: feature_name=SARS.CoV.2.S2                       | feature_id[2].value > threshold=35666.966796875    |
| Class: healthcare workers within 60 days after vaccination |                                                    |
|                                                            |                                                    |
| Rules_150                                                  | passed counts:1                                    |
| node_0: feature_name=HuIgG_0.10                            | feature_id[1].value > threshold=19120.166015625    |
| node_112: feature_name=a-HuIgG_0.03                        | feature_id[8].value <= threshold=19665.666015625   |
| node_113: feature_name=SARS.CoV.2.S1.mFcTag                | feature_id[3].value > threshold=54010.166015625    |
| node_351: feature_name=SARS.CoV.2.S2                       | feature_id[2].value <= threshold=37075.75          |
| node_352: feature_name=a-HuIgG_0.03                        | feature_id[8].value <= threshold=17721.1669921875  |
| node_353: feature_name=MoIgA_0.10                          | feature_id[13].value > threshold=536.0             |
| node_367: feature_name=HuIgG_0.03                          | feature_id[5].value <= threshold=5634.333251953125 |
| node_368: feature_name=SARS.CoV.2.S1+S2                    | feature_id[12].value <= threshold=52432.75         |
| node_369: feature_name=SARS.CoV.S1.HisTag                  | feature_id[6].value <= threshold=17773.60009765625 |
| node_370: feature_name=SARS.CoV.2.S2                       | feature_id[2].value <= threshold=35666.966796875   |
| node_371: feature_name=hCoV.HKU1.NP                        | feature_id[10].value > threshold=14106.56640625    |
| node_373: feature_name=hCoV.NL63.S1_S2                     | feature_id[7].value > threshold=44287.798828125    |
| Class: healthcare workers 60–180 days after vaccination    |                                                    |
|                                                            |                                                    |
| Rules_151                                                  | passed counts:1                                    |

|                                                            |                                                     |
|------------------------------------------------------------|-----------------------------------------------------|
| node_0: feature_name=HuIgG_0.10                            | feature_id[1].value > threshold=19120.166015625     |
| node_112: feature_name=a-HuIgG_0.03                        | feature_id[8].value <= threshold=19665.666015625    |
| node_113: feature_name=SARS.CoV.2.S1.mFcTag                | feature_id[3].value > threshold=54010.166015625     |
| node_351: feature_name=SARS.CoV.2.S2                       | feature_id[2].value <= threshold=37075.75           |
| node_352: feature_name=a-HuIgG_0.03                        | feature_id[8].value <= threshold=17721.1669921875   |
| node_353: feature_name=MoIgA_0.10                          | feature_id[13].value > threshold=536.0              |
| node_367: feature_name=HuIgG_0.03                          | feature_id[5].value <= threshold=5634.333251953125  |
| node_368: feature_name=SARS.CoV.2.S1+S2                    | feature_id[12].value <= threshold=52432.75          |
| node_369: feature_name=SARS.CoV.S1.HisTag                  | feature_id[6].value <= threshold=17773.60009765625  |
| node_370: feature_name=SARS.CoV.2.S2                       | feature_id[2].value <= threshold=35666.966796875    |
| node_371: feature_name=hCoV.HKU1.NP                        | feature_id[10].value > threshold=14106.56640625     |
| node_373: feature_name=hCoV.NL63.S1_S2                     | feature_id[7].value <= threshold=44287.798828125    |
| Class: healthcare workers within 60 days after vaccination |                                                     |
|                                                            |                                                     |
| Rules_152                                                  | passed counts:1                                     |
| node_0: feature_name=HuIgG_0.10                            | feature_id[1].value > threshold=19120.166015625     |
| node_112: feature_name=a-HuIgG_0.03                        | feature_id[8].value <= threshold=19665.666015625    |
| node_113: feature_name=SARS.CoV.2.S1.mFcTag                | feature_id[3].value > threshold=54010.166015625     |
| node_351: feature_name=SARS.CoV.2.S2                       | feature_id[2].value <= threshold=37075.75           |
| node_352: feature_name=a-HuIgG_0.03                        | feature_id[8].value <= threshold=17721.1669921875   |
| node_353: feature_name=MoIgA_0.10                          | feature_id[13].value <= threshold=536.0             |
| node_354: feature_name=hCoV.HKU1.NP                        | feature_id[10].value <= threshold=7098.5            |
| node_355: feature_name=MoIgA_0.10                          | feature_id[13].value <= threshold=462.0             |
| node_356: feature_name=hCoV.HKU1.NP                        | feature_id[10].value <= threshold=2790.583251953125 |
| node_357: feature_name=hCoV.NL63.S1_S2                     | feature_id[7].value > threshold=36099.0             |



|                                                            |                                                      |
|------------------------------------------------------------|------------------------------------------------------|
| node_359: feature_name=hCoV.HKU1.NP                        | feature_id[10].value <= threshold=1348.6666870117188 |
| node_360: feature_name=SARS.CoV.S1.HisTag                  | feature_id[6].value <= threshold=5850.833251953125   |
| Class: healthcare workers within 60 days after vaccination |                                                      |
|                                                            |                                                      |
| Rules_153                                                  | passed counts:1                                      |
| node_0: feature_name=HuIgG_0.10                            | feature_id[1].value > threshold=19120.166015625      |
| node_112: feature_name=a-HuIgG_0.03                        | feature_id[8].value <= threshold=19665.666015625     |
| node_113: feature_name=SARS.CoV.2.S1.mFcTag                | feature_id[3].value <= threshold=54010.166015625     |
| node_114: feature_name=SARS.CoV.2.S1+S2                    | feature_id[12].value > threshold=47258.43359375      |
| node_240: feature_name=HuIgG_0.03                          | feature_id[5].value > threshold=5455.5               |
| node_266: feature_name=HuIgG_0.10                          | feature_id[1].value > threshold=24231.0              |
| node_284: feature_name=HuIgG_0.03                          | feature_id[5].value > threshold=5469.0               |
| node_286: feature_name=HuIgG_0.10                          | feature_id[1].value <= threshold=30107.666015625     |
| node_287: feature_name=SARS.CoV.2.S1+S2                    | feature_id[12].value > threshold=47536.224609375     |
| node_291: feature_name=SARS.CoV.2.S2                       | feature_id[2].value > threshold=37653.75             |
| node_329: feature_name=SARS.CoV.2.S1.mFcTag                | feature_id[3].value > threshold=53346.333984375      |
| node_345: feature_name=SARS.CoV.2.S1.mFcTag                | feature_id[3].value <= threshold=53555.333984375     |
| node_346: feature_name=SARS.CoV.2.S2                       | feature_id[2].value <= threshold=45480.583984375     |
| Class: healthcare workers within 60 days after vaccination |                                                      |
|                                                            |                                                      |
| Rules_154                                                  | passed counts:1                                      |
| node_0: feature_name=HuIgG_0.10                            | feature_id[1].value > threshold=19120.166015625      |
| node_112: feature_name=a-HuIgG_0.03                        | feature_id[8].value <= threshold=19665.666015625     |
| node_113: feature_name=SARS.CoV.2.S1.mFcTag                | feature_id[3].value <= threshold=54010.166015625     |
| node_114: feature_name=SARS.CoV.2.S1+S2                    | feature_id[12].value > threshold=47258.43359375      |

|                                                         |                                                  |
|---------------------------------------------------------|--------------------------------------------------|
| node_240: feature_name=HuIgG_0.03                       | feature_id[5].value > threshold=5455.5           |
| node_266: feature_name=HuIgG_0.10                       | feature_id[1].value > threshold=24231.0          |
| node_284: feature_name=HuIgG_0.03                       | feature_id[5].value > threshold=5469.0           |
| node_286: feature_name=HuIgG_0.10                       | feature_id[1].value <= threshold=30107.666015625 |
| node_287: feature_name=SARS.CoV.2.S1+S2                 | feature_id[12].value > threshold=47536.224609375 |
| node_291: feature_name=SARS.CoV.2.S2                    | feature_id[2].value > threshold=37653.75         |
| node_329: feature_name=SARS.CoV.2.S1.mFcTag             | feature_id[3].value <= threshold=53346.333984375 |
| node_330: feature_name=Flu.B_Phu/.HA1+HA2               | feature_id[11].value > threshold=53733.0         |
| node_340: feature_name=SARS.CoV.2.S1+S2                 | feature_id[12].value <= threshold=51770.29296875 |
| node_341: feature_name=Flu.B_Phu/.HA1+HA2               | feature_id[11].value > threshold=53805.5         |
| Class: healthcare workers 60–180 days after vaccination |                                                  |
|                                                         |                                                  |
| Rules_155                                               | passed counts:1                                  |
| node_0: feature_name=HuIgG_0.10                         | feature_id[1].value > threshold=19120.166015625  |
| node_112: feature_name=a-HuIgG_0.03                     | feature_id[8].value <= threshold=19665.666015625 |
| node_113: feature_name=SARS.CoV.2.S1.mFcTag             | feature_id[3].value <= threshold=54010.166015625 |
| node_114: feature_name=SARS.CoV.2.S1+S2                 | feature_id[12].value > threshold=47258.43359375  |
| node_240: feature_name=HuIgG_0.03                       | feature_id[5].value > threshold=5455.5           |
| node_266: feature_name=HuIgG_0.10                       | feature_id[1].value > threshold=24231.0          |
| node_284: feature_name=HuIgG_0.03                       | feature_id[5].value > threshold=5469.0           |
| node_286: feature_name=HuIgG_0.10                       | feature_id[1].value <= threshold=30107.666015625 |
| node_287: feature_name=SARS.CoV.2.S1+S2                 | feature_id[12].value > threshold=47536.224609375 |
| node_291: feature_name=SARS.CoV.2.S2                    | feature_id[2].value > threshold=37653.75         |
| node_329: feature_name=SARS.CoV.2.S1.mFcTag             | feature_id[3].value <= threshold=53346.333984375 |
| node_330: feature_name=Flu.B_Phu/.HA1+HA2               | feature_id[11].value > threshold=53733.0         |

|                                                           |                                                     |
|-----------------------------------------------------------|-----------------------------------------------------|
| node_340: feature_name=SARS.CoV.2.S1+S2                   | feature_id[12].value <= threshold=51770.29296875    |
| node_341: feature_name=Flu.B_Phu/.HA1+HA2                 | feature_id[11].value <= threshold=53805.5           |
| Class: healthcare workers over 180 days after vaccination |                                                     |
|                                                           |                                                     |
| Rules_156                                                 | passed counts:1                                     |
| node_0: feature_name=HuIgG_0.10                           | feature_id[1].value > threshold=19120.166015625     |
| node_112: feature_name=a-HuIgG_0.03                       | feature_id[8].value <= threshold=19665.666015625    |
| node_113: feature_name=SARS.CoV.2.S1.mFcTag               | feature_id[3].value <= threshold=54010.166015625    |
| node_114: feature_name=SARS.CoV.2.S1+S2                   | feature_id[12].value > threshold=47258.43359375     |
| node_240: feature_name=HuIgG_0.03                         | feature_id[5].value > threshold=5455.5              |
| node_266: feature_name=HuIgG_0.10                         | feature_id[1].value > threshold=24231.0             |
| node_284: feature_name=HuIgG_0.03                         | feature_id[5].value > threshold=5469.0              |
| node_286: feature_name=HuIgG_0.10                         | feature_id[1].value <= threshold=30107.666015625    |
| node_287: feature_name=SARS.CoV.2.S1+S2                   | feature_id[12].value > threshold=47536.224609375    |
| node_291: feature_name=SARS.CoV.2.S2                      | feature_id[2].value > threshold=37653.75            |
| node_329: feature_name=SARS.CoV.2.S1.mFcTag               | feature_id[3].value <= threshold=53346.333984375    |
| node_330: feature_name=Flu.B_Phu/.HA1+HA2                 | feature_id[11].value <= threshold=53733.0           |
| node_331: feature_name=MoIgA_0.10                         | feature_id[13].value > threshold=10.833333015441895 |
| node_335: feature_name=a-HuIgG_0.03                       | feature_id[8].value <= threshold=11890.0            |
| node_336: feature_name=HuIgG_0.10                         | feature_id[1].value > threshold=25504.333984375     |
| Class: healthcare workers 60–180 days after vaccination   |                                                     |
|                                                           |                                                     |
| Rules_157                                                 | passed counts:1                                     |
| node_0: feature_name=HuIgG_0.10                           | feature_id[1].value > threshold=19120.166015625     |
| node_112: feature_name=a-HuIgG_0.03                       | feature_id[8].value <= threshold=19665.666015625    |

|                                                            |                                                      |
|------------------------------------------------------------|------------------------------------------------------|
| node_113: feature_name=SARS.CoV.2.S1.mFcTag                | feature_id[3].value <= threshold=54010.166015625     |
| node_114: feature_name=SARS.CoV.2.S1+S2                    | feature_id[12].value > threshold=47258.43359375      |
| node_240: feature_name=HuIgG_0.03                          | feature_id[5].value > threshold=5455.5               |
| node_266: feature_name=HuIgG_0.10                          | feature_id[1].value > threshold=24231.0              |
| node_284: feature_name=HuIgG_0.03                          | feature_id[5].value > threshold=5469.0               |
| node_286: feature_name=HuIgG_0.10                          | feature_id[1].value <= threshold=30107.666015625     |
| node_287: feature_name=SARS.CoV.2.S1+S2                    | feature_id[12].value > threshold=47536.224609375     |
| node_291: feature_name=SARS.CoV.2.S2                       | feature_id[2].value > threshold=37653.75             |
| node_329: feature_name=SARS.CoV.2.S1.mFcTag                | feature_id[3].value <= threshold=53346.333984375     |
| node_330: feature_name=Flu.B_Phu/.HA1+HA2                  | feature_id[11].value <= threshold=53733.0            |
| node_331: feature_name=MoIgA_0.10                          | feature_id[13].value <= threshold=10.833333015441895 |
| node_332: feature_name=SARS.CoV.2.S2                       | feature_id[2].value > threshold=50911.75             |
| Class: healthcare workers within 60 days after vaccination |                                                      |
|                                                            |                                                      |
| Rules_158                                                  | passed counts:1                                      |
| node_0: feature_name=HuIgG_0.10                            | feature_id[1].value > threshold=19120.166015625      |
| node_112: feature_name=a-HuIgG_0.03                        | feature_id[8].value <= threshold=19665.666015625     |
| node_113: feature_name=SARS.CoV.2.S1.mFcTag                | feature_id[3].value <= threshold=54010.166015625     |
| node_114: feature_name=SARS.CoV.2.S1+S2                    | feature_id[12].value > threshold=47258.43359375      |
| node_240: feature_name=HuIgG_0.03                          | feature_id[5].value > threshold=5455.5               |
| node_266: feature_name=HuIgG_0.10                          | feature_id[1].value > threshold=24231.0              |
| node_284: feature_name=HuIgG_0.03                          | feature_id[5].value > threshold=5469.0               |
| node_286: feature_name=HuIgG_0.10                          | feature_id[1].value <= threshold=30107.666015625     |
| node_287: feature_name=SARS.CoV.2.S1+S2                    | feature_id[12].value > threshold=47536.224609375     |
| node_291: feature_name=SARS.CoV.2.S2                       | feature_id[2].value > threshold=37653.75             |

|                                                         |                                                      |
|---------------------------------------------------------|------------------------------------------------------|
| node_329: feature_name=SARS.CoV.2.S1.mFcTag             | feature_id[3].value <= threshold=53346.333984375     |
| node_330: feature_name=Flu.B_Phu/.HA1+HA2               | feature_id[11].value <= threshold=53733.0            |
| node_331: feature_name=MoIgA_0.10                       | feature_id[13].value <= threshold=10.833333015441895 |
| node_332: feature_name=SARS.CoV.2.S2                    | feature_id[2].value <= threshold=50911.75            |
| Class: healthcare workers 60–180 days after vaccination |                                                      |
| Rules_159                                               | passed counts:1                                      |
| node_0: feature_name=HuIgG_0.10                         | feature_id[1].value > threshold=19120.166015625      |
| node_112: feature_name=a-HuIgG_0.03                     | feature_id[8].value <= threshold=19665.666015625     |
| node_113: feature_name=SARS.CoV.2.S1.mFcTag             | feature_id[3].value <= threshold=54010.166015625     |
| node_114: feature_name=SARS.CoV.2.S1+S2                 | feature_id[12].value > threshold=47258.43359375      |
| node_240: feature_name=HuIgG_0.03                       | feature_id[5].value > threshold=5455.5               |
| node_266: feature_name=HuIgG_0.10                       | feature_id[1].value > threshold=24231.0              |
| node_284: feature_name=HuIgG_0.03                       | feature_id[5].value > threshold=5469.0               |
| node_286: feature_name=HuIgG_0.10                       | feature_id[1].value <= threshold=30107.666015625     |
| node_287: feature_name=SARS.CoV.2.S1+S2                 | feature_id[12].value > threshold=47536.224609375     |
| node_291: feature_name=SARS.CoV.2.S2                    | feature_id[2].value <= threshold=37653.75            |
| node_292: feature_name=SARS.CoV.2.S2                    | feature_id[2].value > threshold=36044.29296875       |
| node_322: feature_name=hCoV.HKU1.NP                     | feature_id[10].value > threshold=2383.1666870117188  |
| node_324: feature_name=SARS.CoV.2.S1+S2                 | feature_id[12].value <= threshold=49449.75           |
| node_325: feature_name=hCoV.HKU1.NP                     | feature_id[10].value > threshold=9806.416748046875   |
| Class: healthcare workers 60–180 days after vaccination |                                                      |
| Rules_160                                               | passed counts:1                                      |
| node_0: feature_name=HuIgG_0.10                         | feature_id[1].value > threshold=19120.166015625      |

|                                                            |                                                     |
|------------------------------------------------------------|-----------------------------------------------------|
| node_112: feature_name=a-HuIgG_0.03                        | feature_id[8].value <= threshold=19665.666015625    |
| node_113: feature_name=SARS.CoV.2.S1.mFcTag                | feature_id[3].value <= threshold=54010.166015625    |
| node_114: feature_name=SARS.CoV.2.S1+S2                    | feature_id[12].value > threshold=47258.43359375     |
| node_240: feature_name=HuIgG_0.03                          | feature_id[5].value > threshold=5455.5              |
| node_266: feature_name=HuIgG_0.10                          | feature_id[1].value > threshold=24231.0             |
| node_284: feature_name=HuIgG_0.03                          | feature_id[5].value > threshold=5469.0              |
| node_286: feature_name=HuIgG_0.10                          | feature_id[1].value <= threshold=30107.666015625    |
| node_287: feature_name=SARS.CoV.2.S1+S2                    | feature_id[12].value > threshold=47536.224609375    |
| node_291: feature_name=SARS.CoV.2.S2                       | feature_id[2].value <= threshold=37653.75           |
| node_292: feature_name=SARS.CoV.2.S2                       | feature_id[2].value > threshold=36044.29296875      |
| node_322: feature_name=hCoV.HKU1.NP                        | feature_id[10].value > threshold=2383.1666870117188 |
| node_324: feature_name=SARS.CoV.2.S1+S2                    | feature_id[12].value <= threshold=49449.75          |
| node_325: feature_name=hCoV.HKU1.NP                        | feature_id[10].value <= threshold=9806.416748046875 |
| Class: healthcare workers within 60 days after vaccination |                                                     |
|                                                            |                                                     |
| Rules_161                                                  | passed counts:1                                     |
| node_0: feature_name=HuIgG_0.10                            | feature_id[1].value > threshold=19120.166015625     |
| node_112: feature_name=a-HuIgG_0.03                        | feature_id[8].value <= threshold=19665.666015625    |
| node_113: feature_name=SARS.CoV.2.S1.mFcTag                | feature_id[3].value <= threshold=54010.166015625    |
| node_114: feature_name=SARS.CoV.2.S1+S2                    | feature_id[12].value > threshold=47258.43359375     |
| node_240: feature_name=HuIgG_0.03                          | feature_id[5].value > threshold=5455.5              |
| node_266: feature_name=HuIgG_0.10                          | feature_id[1].value > threshold=24231.0             |
| node_284: feature_name=HuIgG_0.03                          | feature_id[5].value > threshold=5469.0              |
| node_286: feature_name=HuIgG_0.10                          | feature_id[1].value <= threshold=30107.666015625    |
| node_287: feature_name=SARS.CoV.2.S1+S2                    | feature_id[12].value > threshold=47536.224609375    |

|                                                            |                                                     |
|------------------------------------------------------------|-----------------------------------------------------|
| node_291: feature_name=SARS.CoV.2.S2                       | feature_id[2].value <= threshold=37653.75           |
| node_292: feature_name=SARS.CoV.2.S2                       | feature_id[2].value <= threshold=36044.29296875     |
| node_293: feature_name=HuIgG_0.03                          | feature_id[5].value > threshold=6329.5              |
| node_301: feature_name=HuIgG_0.03                          | feature_id[5].value > threshold=6562.16650390625    |
| node_307: feature_name=Flu.B_Phu/.HA1+HA2                  | feature_id[11].value > threshold=54123.5            |
| node_319: feature_name=hCoV.NL63.S1_S2                     | feature_id[7].value > threshold=43715.833984375     |
| Class: healthcare workers within 60 days after vaccination |                                                     |
|                                                            |                                                     |
| Rules_162                                                  | passed counts:1                                     |
| node_0: feature_name=HuIgG_0.10                            | feature_id[1].value > threshold=19120.166015625     |
| node_112: feature_name=a-HuIgG_0.03                        | feature_id[8].value <= threshold=19665.666015625    |
| node_113: feature_name=SARS.CoV.2.S1.mFcTag                | feature_id[3].value <= threshold=54010.166015625    |
| node_114: feature_name=SARS.CoV.2.S1+S2                    | feature_id[12].value > threshold=47258.43359375     |
| node_240: feature_name=HuIgG_0.03                          | feature_id[5].value > threshold=5455.5              |
| node_266: feature_name=HuIgG_0.10                          | feature_id[1].value > threshold=24231.0             |
| node_284: feature_name=HuIgG_0.03                          | feature_id[5].value > threshold=5469.0              |
| node_286: feature_name=HuIgG_0.10                          | feature_id[1].value <= threshold=30107.666015625    |
| node_287: feature_name=SARS.CoV.2.S1+S2                    | feature_id[12].value > threshold=47536.224609375    |
| node_291: feature_name=SARS.CoV.2.S2                       | feature_id[2].value <= threshold=37653.75           |
| node_292: feature_name=SARS.CoV.2.S2                       | feature_id[2].value <= threshold=36044.29296875     |
| node_293: feature_name=HuIgG_0.03                          | feature_id[5].value > threshold=6329.5              |
| node_301: feature_name=HuIgG_0.03                          | feature_id[5].value > threshold=6562.16650390625    |
| node_307: feature_name=Flu.B_Phu/.HA1+HA2                  | feature_id[11].value <= threshold=54123.5           |
| node_308: feature_name=MoIgA_0.10                          | feature_id[13].value > threshold=21.166666984558105 |
| node_310: feature_name=hCoV.NL63.S1_S2                     | feature_id[7].value > threshold=33291.458984375     |

|                                                         |                                                      |
|---------------------------------------------------------|------------------------------------------------------|
| node_314: feature_name=SARS.CoV.2.S1.mFcTag             | feature_id[3].value <= threshold=50604.0             |
| node_315: feature_name=SARS.CoV.2.Spike.RBD.rFc         | feature_id[9].value > threshold=43138.767578125      |
| Class: healthcare workers 60–180 days after vaccination |                                                      |
|                                                         |                                                      |
| Rules_163                                               | passed counts:1                                      |
| node_0: feature_name=HuIgG_0.10                         | feature_id[1].value > threshold=19120.166015625      |
| node_112: feature_name=a-HuIgG_0.03                     | feature_id[8].value <= threshold=19665.666015625     |
| node_113: feature_name=SARS.CoV.2.S1.mFcTag             | feature_id[3].value <= threshold=54010.166015625     |
| node_114: feature_name=SARS.CoV.2.S1+S2                 | feature_id[12].value > threshold=47258.43359375      |
| node_240: feature_name=HuIgG_0.03                       | feature_id[5].value > threshold=5455.5               |
| node_266: feature_name=HuIgG_0.10                       | feature_id[1].value > threshold=24231.0              |
| node_284: feature_name=HuIgG_0.03                       | feature_id[5].value > threshold=5469.0               |
| node_286: feature_name=HuIgG_0.10                       | feature_id[1].value <= threshold=30107.666015625     |
| node_287: feature_name=SARS.CoV.2.S1+S2                 | feature_id[12].value > threshold=47536.224609375     |
| node_291: feature_name=SARS.CoV.2.S2                    | feature_id[2].value <= threshold=37653.75            |
| node_292: feature_name=SARS.CoV.2.S2                    | feature_id[2].value <= threshold=36044.29296875      |
| node_293: feature_name=HuIgG_0.03                       | feature_id[5].value > threshold=6329.5               |
| node_301: feature_name=HuIgG_0.03                       | feature_id[5].value > threshold=6562.16650390625     |
| node_307: feature_name=Flu.B_Phu/.HA1+HA2               | feature_id[11].value <= threshold=54123.5            |
| node_308: feature_name=MoIgA_0.10                       | feature_id[13].value <= threshold=21.166666984558105 |
| Class: healthcare workers 60–180 days after vaccination |                                                      |
|                                                         |                                                      |
| Rules_164                                               | passed counts:1                                      |
| node_0: feature_name=HuIgG_0.10                         | feature_id[1].value > threshold=19120.166015625      |
| node_112: feature_name=a-HuIgG_0.03                     | feature_id[8].value <= threshold=19665.666015625     |



|                                                         |                                                     |
|---------------------------------------------------------|-----------------------------------------------------|
| node_113: feature_name=SARS.CoV.2.S1.mFcTag             | feature_id[3].value <= threshold=54010.166015625    |
| node_114: feature_name=SARS.CoV.2.S1+S2                 | feature_id[12].value > threshold=47258.43359375     |
| node_240: feature_name=HuIgG_0.03                       | feature_id[5].value > threshold=5455.5              |
| node_266: feature_name=HuIgG_0.10                       | feature_id[1].value > threshold=24231.0             |
| node_284: feature_name=HuIgG_0.03                       | feature_id[5].value > threshold=5469.0              |
| node_286: feature_name=HuIgG_0.10                       | feature_id[1].value <= threshold=30107.666015625    |
| node_287: feature_name=SARS.CoV.2.S1+S2                 | feature_id[12].value > threshold=47536.224609375    |
| node_291: feature_name=SARS.CoV.2.S2                    | feature_id[2].value <= threshold=37653.75           |
| node_292: feature_name=SARS.CoV.2.S2                    | feature_id[2].value <= threshold=36044.29296875     |
| node_293: feature_name=HuIgG_0.03                       | feature_id[5].value > threshold=6329.5              |
| node_301: feature_name=HuIgG_0.03                       | feature_id[5].value <= threshold=6562.16650390625   |
| node_302: feature_name=Flu.B_Phu/.HA1+HA2               | feature_id[11].value > threshold=53338.533203125    |
| node_304: feature_name=hCoV.HKU1.NP                     | feature_id[10].value > threshold=12278.249755859375 |
| Class: healthcare workers 60–180 days after vaccination |                                                     |
|                                                         |                                                     |
| Rules_165                                               | passed counts:1                                     |
| node_0: feature_name=HuIgG_0.10                         | feature_id[1].value > threshold=19120.166015625     |
| node_112: feature_name=a-HuIgG_0.03                     | feature_id[8].value <= threshold=19665.666015625    |
| node_113: feature_name=SARS.CoV.2.S1.mFcTag             | feature_id[3].value <= threshold=54010.166015625    |
| node_114: feature_name=SARS.CoV.2.S1+S2                 | feature_id[12].value > threshold=47258.43359375     |
| node_240: feature_name=HuIgG_0.03                       | feature_id[5].value > threshold=5455.5              |
| node_266: feature_name=HuIgG_0.10                       | feature_id[1].value > threshold=24231.0             |
| node_284: feature_name=HuIgG_0.03                       | feature_id[5].value > threshold=5469.0              |
| node_286: feature_name=HuIgG_0.10                       | feature_id[1].value <= threshold=30107.666015625    |
| node_287: feature_name=SARS.CoV.2.S1+S2                 | feature_id[12].value > threshold=47536.224609375    |

|                                                         |                                                  |
|---------------------------------------------------------|--------------------------------------------------|
| node_291: feature_name=SARS.CoV.2.S2                    | feature_id[2].value <= threshold=37653.75        |
| node_292: feature_name=SARS.CoV.2.S2                    | feature_id[2].value <= threshold=36044.29296875  |
| node_293: feature_name=HuIgG_0.03                       | feature_id[5].value <= threshold=6329.5          |
| node_294: feature_name=Flu.B_Phu/.HA1+HA2               | feature_id[11].value > threshold=50410.16796875  |
| node_296: feature_name=HuIgG_0.03                       | feature_id[5].value <= threshold=5639.0          |
| node_297: feature_name=SARS.CoV.2.S2                    | feature_id[2].value > threshold=30354.591796875  |
| Class: healthcare workers 60–180 days after vaccination |                                                  |
|                                                         |                                                  |
| Rules_166                                               | passed counts:1                                  |
| node_0: feature_name=HuIgG_0.10                         | feature_id[1].value > threshold=19120.166015625  |
| node_112: feature_name=a-HuIgG_0.03                     | feature_id[8].value <= threshold=19665.666015625 |
| node_113: feature_name=SARS.CoV.2.S1.mFcTag             | feature_id[3].value <= threshold=54010.166015625 |
| node_114: feature_name=SARS.CoV.2.S1+S2                 | feature_id[12].value > threshold=47258.43359375  |
| node_240: feature_name=HuIgG_0.03                       | feature_id[5].value > threshold=5455.5           |
| node_266: feature_name=HuIgG_0.10                       | feature_id[1].value > threshold=24231.0          |
| node_284: feature_name=HuIgG_0.03                       | feature_id[5].value > threshold=5469.0           |
| node_286: feature_name=HuIgG_0.10                       | feature_id[1].value <= threshold=30107.666015625 |
| node_287: feature_name=SARS.CoV.2.S1+S2                 | feature_id[12].value > threshold=47536.224609375 |
| node_291: feature_name=SARS.CoV.2.S2                    | feature_id[2].value <= threshold=37653.75        |
| node_292: feature_name=SARS.CoV.2.S2                    | feature_id[2].value <= threshold=36044.29296875  |
| node_293: feature_name=HuIgG_0.03                       | feature_id[5].value <= threshold=6329.5          |
| node_294: feature_name=Flu.B_Phu/.HA1+HA2               | feature_id[11].value <= threshold=50410.16796875 |
| Class: healthcare workers 60–180 days after vaccination |                                                  |
|                                                         |                                                  |
| Rules_167                                               | passed counts:1                                  |

|                                                            |                                                     |
|------------------------------------------------------------|-----------------------------------------------------|
| node_0: feature_name=HuIgG_0.10                            | feature_id[1].value > threshold=19120.166015625     |
| node_112: feature_name=a-HuIgG_0.03                        | feature_id[8].value <= threshold=19665.666015625    |
| node_113: feature_name=SARS.CoV.2.S1.mFcTag                | feature_id[3].value <= threshold=54010.166015625    |
| node_114: feature_name=SARS.CoV.2.S1+S2                    | feature_id[12].value > threshold=47258.43359375     |
| node_240: feature_name=HuIgG_0.03                          | feature_id[5].value > threshold=5455.5              |
| node_266: feature_name=HuIgG_0.10                          | feature_id[1].value > threshold=24231.0             |
| node_284: feature_name=HuIgG_0.03                          | feature_id[5].value > threshold=5469.0              |
| node_286: feature_name=HuIgG_0.10                          | feature_id[1].value <= threshold=30107.666015625    |
| node_287: feature_name=SARS.CoV.2.S1+S2                    | feature_id[12].value <= threshold=47536.224609375   |
| node_288: feature_name=MoIgA_0.10                          | feature_id[13].value <= threshold=1044.0            |
| Class: healthcare workers within 60 days after vaccination |                                                     |
|                                                            |                                                     |
| Rules_168                                                  | passed counts:1                                     |
| node_0: feature_name=HuIgG_0.10                            | feature_id[1].value > threshold=19120.166015625     |
| node_112: feature_name=a-HuIgG_0.03                        | feature_id[8].value <= threshold=19665.666015625    |
| node_113: feature_name=SARS.CoV.2.S1.mFcTag                | feature_id[3].value <= threshold=54010.166015625    |
| node_114: feature_name=SARS.CoV.2.S1+S2                    | feature_id[12].value > threshold=47258.43359375     |
| node_240: feature_name=HuIgG_0.03                          | feature_id[5].value > threshold=5455.5              |
| node_266: feature_name=HuIgG_0.10                          | feature_id[1].value <= threshold=24231.0            |
| node_267: feature_name=hCoV.HKU1.NP                        | feature_id[10].value > threshold=2123.0000610351562 |
| node_271: feature_name=SARS.CoV.S1.HisTag                  | feature_id[6].value > threshold=8281.83349609375    |
| node_273: feature_name=Flu.B_Phu/.HA1+HA2                  | feature_id[11].value > threshold=51424.19921875     |
| node_275: feature_name=a-HuIgG_0.30                        | feature_id[4].value > threshold=41169.833984375     |
| node_277: feature_name=a-HuIgG_0.30                        | feature_id[4].value > threshold=42934.333984375     |
| node_279: feature_name=a-HuIgG_0.03                        | feature_id[8].value <= threshold=17284.5            |

|                                                         |                                                   |
|---------------------------------------------------------|---------------------------------------------------|
| node_280: feature_name=SARS.CoV.2.S1.mFcTag             | feature_id[3].value <= threshold=51719.75         |
| Class: healthcare workers 60–180 days after vaccination |                                                   |
|                                                         |                                                   |
| Rules_169                                               | passed counts:1                                   |
| node_0: feature_name=HuIgG_0.10                         | feature_id[1].value > threshold=19120.166015625   |
| node_112: feature_name=a-HuIgG_0.03                     | feature_id[8].value <= threshold=19665.666015625  |
| node_113: feature_name=SARS.CoV.2.S1.mFcTag             | feature_id[3].value <= threshold=54010.166015625  |
| node_114: feature_name=SARS.CoV.2.S1+S2                 | feature_id[12].value > threshold=47258.43359375   |
| node_240: feature_name=HuIgG_0.03                       | feature_id[5].value <= threshold=5455.5           |
| node_241: feature_name=SARS.CoV.S1.HisTag               | feature_id[6].value > threshold=745.7222290039062 |
| node_243: feature_name=SARS.CoV.2.S1+S2                 | feature_id[12].value > threshold=48812.91796875   |
| node_253: feature_name=SARS.CoV.S1.HisTag               | feature_id[6].value > threshold=2772.300048828125 |
| node_257: feature_name=HuIgG_0.10                       | feature_id[1].value > threshold=26991.8330078125  |
| node_263: feature_name=a-HuIgG_0.03                     | feature_id[8].value <= threshold=11532.0          |
| Class: healthcare workers 60–180 days after vaccination |                                                   |
|                                                         |                                                   |
| Rules_170                                               | passed counts:1                                   |
| node_0: feature_name=HuIgG_0.10                         | feature_id[1].value > threshold=19120.166015625   |
| node_112: feature_name=a-HuIgG_0.03                     | feature_id[8].value <= threshold=19665.666015625  |
| node_113: feature_name=SARS.CoV.2.S1.mFcTag             | feature_id[3].value <= threshold=54010.166015625  |
| node_114: feature_name=SARS.CoV.2.S1+S2                 | feature_id[12].value > threshold=47258.43359375   |
| node_240: feature_name=HuIgG_0.03                       | feature_id[5].value <= threshold=5455.5           |
| node_241: feature_name=SARS.CoV.S1.HisTag               | feature_id[6].value > threshold=745.7222290039062 |
| node_243: feature_name=SARS.CoV.2.S1+S2                 | feature_id[12].value > threshold=48812.91796875   |
| node_253: feature_name=SARS.CoV.S1.HisTag               | feature_id[6].value > threshold=2772.300048828125 |

|                                                         |                                                     |
|---------------------------------------------------------|-----------------------------------------------------|
| node_257: feature_name=HuIgG_0.10                       | feature_id[1].value <= threshold=26991.8330078125   |
| node_258: feature_name=SARS.CoV.2.S1.RBD.mFc            | feature_id[0].value <= threshold=41406.666015625    |
| node_259: feature_name=SARS.CoV.2.S1.RBD.mFc            | feature_id[0].value > threshold=40954.3828125       |
| Class: healthcare workers 60–180 days after vaccination |                                                     |
| Rules_171                                               | passed counts:1                                     |
| node_0: feature_name=HuIgG_0.10                         | feature_id[1].value > threshold=19120.166015625     |
| node_112: feature_name=a-HuIgG_0.03                     | feature_id[8].value <= threshold=19665.666015625    |
| node_113: feature_name=SARS.CoV.2.S1.mFcTag             | feature_id[3].value <= threshold=54010.166015625    |
| node_114: feature_name=SARS.CoV.2.S1+S2                 | feature_id[12].value > threshold=47258.43359375     |
| node_240: feature_name=HuIgG_0.03                       | feature_id[5].value <= threshold=5455.5             |
| node_241: feature_name=SARS.CoV.S1.HisTag               | feature_id[6].value > threshold=745.7222290039062   |
| node_243: feature_name=SARS.CoV.2.S1+S2                 | feature_id[12].value > threshold=48812.91796875     |
| node_253: feature_name=SARS.CoV.S1.HisTag               | feature_id[6].value <= threshold=2772.300048828125  |
| node_254: feature_name=hCoV.HKU1.NP                     | feature_id[10].value > threshold=3223.1332397460938 |
| Class: healthcare workers 60–180 days after vaccination |                                                     |
| Rules_172                                               | passed counts:1                                     |
| node_0: feature_name=HuIgG_0.10                         | feature_id[1].value > threshold=19120.166015625     |
| node_112: feature_name=a-HuIgG_0.03                     | feature_id[8].value <= threshold=19665.666015625    |
| node_113: feature_name=SARS.CoV.2.S1.mFcTag             | feature_id[3].value <= threshold=54010.166015625    |
| node_114: feature_name=SARS.CoV.2.S1+S2                 | feature_id[12].value > threshold=47258.43359375     |
| node_240: feature_name=HuIgG_0.03                       | feature_id[5].value <= threshold=5455.5             |
| node_241: feature_name=SARS.CoV.S1.HisTag               | feature_id[6].value > threshold=745.7222290039062   |
| node_243: feature_name=SARS.CoV.2.S1+S2                 | feature_id[12].value > threshold=48812.91796875     |

|                                                            |                                                      |
|------------------------------------------------------------|------------------------------------------------------|
| node_253: feature_name=SARS.CoV.S1.HisTag                  | feature_id[6].value <= threshold=2772.300048828125   |
| node_254: feature_name=hCoV.HKU1.NP                        | feature_id[10].value <= threshold=3223.1332397460938 |
| Class: healthcare workers within 60 days after vaccination |                                                      |
|                                                            |                                                      |
| Rules_173                                                  | passed counts:1                                      |
| node_0: feature_name=HuIgG_0.10                            | feature_id[1].value > threshold=19120.166015625      |
| node_112: feature_name=a-HuIgG_0.03                        | feature_id[8].value <= threshold=19665.666015625     |
| node_113: feature_name=SARS.CoV.2.S1.mFcTag                | feature_id[3].value <= threshold=54010.166015625     |
| node_114: feature_name=SARS.CoV.2.S1+S2                    | feature_id[12].value > threshold=47258.43359375      |
| node_240: feature_name=HuIgG_0.03                          | feature_id[5].value <= threshold=5455.5              |
| node_241: feature_name=SARS.CoV.S1.HisTag                  | feature_id[6].value > threshold=745.7222290039062    |
| node_243: feature_name=SARS.CoV.2.S1+S2                    | feature_id[12].value <= threshold=48812.91796875     |
| node_244: feature_name=SARS.CoV.2.S2                       | feature_id[2].value > threshold=26981.416015625      |
| node_246: feature_name=Flu.B_Phu/.HA1+HA2                  | feature_id[11].value > threshold=52223.0             |
| node_250: feature_name=SARS.CoV.2.S1.mFcTag                | feature_id[3].value <= threshold=49570.5             |
| Class: healthcare workers within 60 days after vaccination |                                                      |
|                                                            |                                                      |
| Rules_174                                                  | passed counts:1                                      |
| node_0: feature_name=HuIgG_0.10                            | feature_id[1].value > threshold=19120.166015625      |
| node_112: feature_name=a-HuIgG_0.03                        | feature_id[8].value <= threshold=19665.666015625     |
| node_113: feature_name=SARS.CoV.2.S1.mFcTag                | feature_id[3].value <= threshold=54010.166015625     |
| node_114: feature_name=SARS.CoV.2.S1+S2                    | feature_id[12].value > threshold=47258.43359375      |
| node_240: feature_name=HuIgG_0.03                          | feature_id[5].value <= threshold=5455.5              |
| node_241: feature_name=SARS.CoV.S1.HisTag                  | feature_id[6].value > threshold=745.7222290039062    |
| node_243: feature_name=SARS.CoV.2.S1+S2                    | feature_id[12].value <= threshold=48812.91796875     |

|                                                         |                                                    |
|---------------------------------------------------------|----------------------------------------------------|
| node_244: feature_name=SARS.CoV.2.S2                    | feature_id[2].value > threshold=26981.416015625    |
| node_246: feature_name=Flu.B_Phu/.HA1+HA2               | feature_id[11].value <= threshold=52223.0          |
| node_247: feature_name=Flu.B_Phu/.HA1+HA2               | feature_id[11].value <= threshold=47753.833984375  |
| Class: healthcare workers 60–180 days after vaccination |                                                    |
|                                                         |                                                    |
| Rules_175                                               | passed counts:1                                    |
| node_0: feature_name=HuIgG_0.10                         | feature_id[1].value > threshold=19120.166015625    |
| node_112: feature_name=a-HuIgG_0.03                     | feature_id[8].value <= threshold=19665.666015625   |
| node_113: feature_name=SARS.CoV.2.S1.mFcTag             | feature_id[3].value <= threshold=54010.166015625   |
| node_114: feature_name=SARS.CoV.2.S1+S2                 | feature_id[12].value > threshold=47258.43359375    |
| node_240: feature_name=HuIgG_0.03                       | feature_id[5].value <= threshold=5455.5            |
| node_241: feature_name=SARS.CoV.S1.HisTag               | feature_id[6].value <= threshold=745.7222290039062 |
| Class: unvaccinated healthcare workers                  |                                                    |
|                                                         |                                                    |
| Rules_176                                               | passed counts:1                                    |
| node_0: feature_name=HuIgG_0.10                         | feature_id[1].value > threshold=19120.166015625    |
| node_112: feature_name=a-HuIgG_0.03                     | feature_id[8].value <= threshold=19665.666015625   |
| node_113: feature_name=SARS.CoV.2.S1.mFcTag             | feature_id[3].value <= threshold=54010.166015625   |
| node_114: feature_name=SARS.CoV.2.S1+S2                 | feature_id[12].value <= threshold=47258.43359375   |
| node_115: feature_name=SARS.CoV.2.S1.RBD.mFc            | feature_id[0].value > threshold=301.73333740234375 |
| node_131: feature_name=a-HuIgG_0.03                     | feature_id[8].value > threshold=12099.83349609375  |
| node_183: feature_name=Flu.B_Phu/.HA1+HA2               | feature_id[11].value > threshold=41918.533203125   |
| node_187: feature_name=SARS.CoV.2.Spike.RBD.rFc         | feature_id[9].value > threshold=27438.341796875    |
| node_197: feature_name=SARS.CoV.2.S2                    | feature_id[2].value <= threshold=35177.640625      |
| node_198: feature_name=hCoV.HKU1.NP                     | feature_id[10].value > threshold=2645.916748046875 |

|                                                            |                                                    |
|------------------------------------------------------------|----------------------------------------------------|
| node_210: feature_name=Flu.B_Phu/.HA1+HA2                  | feature_id[11].value > threshold=54029.166015625   |
| node_236: feature_name=SARS.CoV.2.S1.RBD.mFc               | feature_id[0].value > threshold=47021.16796875     |
| Class: healthcare workers within 60 days after vaccination |                                                    |
|                                                            |                                                    |
| Rules_177                                                  | passed counts:1                                    |
| node_0: feature_name=HuIgG_0.10                            | feature_id[1].value > threshold=19120.166015625    |
| node_112: feature_name=a-HuIgG_0.03                        | feature_id[8].value <= threshold=19665.666015625   |
| node_113: feature_name=SARS.CoV.2.S1.mFcTag                | feature_id[3].value <= threshold=54010.166015625   |
| node_114: feature_name=SARS.CoV.2.S1+S2                    | feature_id[12].value <= threshold=47258.43359375   |
| node_115: feature_name=SARS.CoV.2.S1.RBD.mFc               | feature_id[0].value > threshold=301.73333740234375 |
| node_131: feature_name=a-HuIgG_0.03                        | feature_id[8].value > threshold=12099.83349609375  |
| node_183: feature_name=Flu.B_Phu/.HA1+HA2                  | feature_id[11].value > threshold=41918.533203125   |
| node_187: feature_name=SARS.CoV.2.Spike.RBD.rFc            | feature_id[9].value > threshold=27438.341796875    |
| node_197: feature_name=SARS.CoV.2.S2                       | feature_id[2].value <= threshold=35177.640625      |
| node_198: feature_name=hCoV.HKU1.NP                        | feature_id[10].value > threshold=2645.916748046875 |
| node_210: feature_name=Flu.B_Phu/.HA1+HA2                  | feature_id[11].value <= threshold=54029.166015625  |
| node_211: feature_name=HuIgG_0.10                          | feature_id[1].value > threshold=21359.5            |
| node_213: feature_name=hCoV.NL63.S1_S2                     | feature_id[7].value > threshold=32523.4248046875   |
| node_215: feature_name=HuIgG_0.10                          | feature_id[1].value > threshold=23274.166015625    |
| node_217: feature_name=HuIgG_0.10                          | feature_id[1].value > threshold=25231.1669921875   |
| node_227: feature_name=SARS.CoV.2.S2                       | feature_id[2].value > threshold=18038.125          |
| node_231: feature_name=a-HuIgG_0.03                        | feature_id[8].value > threshold=12541.1669921875   |
| node_233: feature_name=SARS.CoV.2.S1+S2                    | feature_id[12].value > threshold=47171.75          |
| Class: healthcare workers 60–180 days after vaccination    |                                                    |
|                                                            |                                                    |



|                                                         |                                                    |
|---------------------------------------------------------|----------------------------------------------------|
| Rules_178                                               | passed counts:1                                    |
| node_0: feature_name=HuIgG_0.10                         | feature_id[1].value > threshold=19120.166015625    |
| node_112: feature_name=a-HuIgG_0.03                     | feature_id[8].value <= threshold=19665.666015625   |
| node_113: feature_name=SARS.CoV.2.S1.mFcTag             | feature_id[3].value <= threshold=54010.166015625   |
| node_114: feature_name=SARS.CoV.2.S1+S2                 | feature_id[12].value <= threshold=47258.43359375   |
| node_115: feature_name=SARS.CoV.2.S1.RBD.mFc            | feature_id[0].value > threshold=301.73333740234375 |
| node_131: feature_name=a-HuIgG_0.03                     | feature_id[8].value > threshold=12099.83349609375  |
| node_183: feature_name=Flu.B_Phu/.HA1+HA2               | feature_id[11].value > threshold=41918.533203125   |
| node_187: feature_name=SARS.CoV.2.Spike.RBD.rFc         | feature_id[9].value > threshold=27438.341796875    |
| node_197: feature_name=SARS.CoV.2.S2                    | feature_id[2].value <= threshold=35177.640625      |
| node_198: feature_name=hCoV.HKU1.NP                     | feature_id[10].value > threshold=2645.916748046875 |
| node_210: feature_name=Flu.B_Phu/.HA1+HA2               | feature_id[11].value <= threshold=54029.166015625  |
| node_211: feature_name=HuIgG_0.10                       | feature_id[1].value > threshold=21359.5            |
| node_213: feature_name=hCoV.NL63.S1_S2                  | feature_id[7].value > threshold=32523.4248046875   |
| node_215: feature_name=HuIgG_0.10                       | feature_id[1].value > threshold=23274.166015625    |
| node_217: feature_name=HuIgG_0.10                       | feature_id[1].value > threshold=25231.1669921875   |
| node_227: feature_name=SARS.CoV.2.S2                    | feature_id[2].value > threshold=18038.125          |
| node_231: feature_name=a-HuIgG_0.03                     | feature_id[8].value <= threshold=12541.1669921875  |
| Class: healthcare workers 60–180 days after vaccination |                                                    |
|                                                         |                                                    |
| Rules_179                                               | passed counts:1                                    |
| node_0: feature_name=HuIgG_0.10                         | feature_id[1].value > threshold=19120.166015625    |
| node_112: feature_name=a-HuIgG_0.03                     | feature_id[8].value <= threshold=19665.666015625   |
| node_113: feature_name=SARS.CoV.2.S1.mFcTag             | feature_id[3].value <= threshold=54010.166015625   |
| node_114: feature_name=SARS.CoV.2.S1+S2                 | feature_id[12].value <= threshold=47258.43359375   |

|                                                            |                                                    |
|------------------------------------------------------------|----------------------------------------------------|
| node_115: feature_name=SARS.CoV.2.S1.RBD.mFc               | feature_id[0].value > threshold=301.73333740234375 |
| node_131: feature_name=a-HuIgG_0.03                        | feature_id[8].value > threshold=12099.83349609375  |
| node_183: feature_name=Flu.B_Phu/.HA1+HA2                  | feature_id[11].value > threshold=41918.533203125   |
| node_187: feature_name=SARS.CoV.2.Spike.RBD.rFc            | feature_id[9].value > threshold=27438.341796875    |
| node_197: feature_name=SARS.CoV.2.S2                       | feature_id[2].value <= threshold=35177.640625      |
| node_198: feature_name=hCoV.HKU1.NP                        | feature_id[10].value > threshold=2645.916748046875 |
| node_210: feature_name=Flu.B_Phu/.HA1+HA2                  | feature_id[11].value <= threshold=54029.166015625  |
| node_211: feature_name=HuIgG_0.10                          | feature_id[1].value > threshold=21359.5            |
| node_213: feature_name=hCoV.NL63.S1_S2                     | feature_id[7].value > threshold=32523.4248046875   |
| node_215: feature_name=HuIgG_0.10                          | feature_id[1].value > threshold=23274.166015625    |
| node_217: feature_name=HuIgG_0.10                          | feature_id[1].value > threshold=25231.1669921875   |
| node_227: feature_name=SARS.CoV.2.S2                       | feature_id[2].value <= threshold=18038.125         |
| node_228: feature_name=hCoV.HKU1.NP                        | feature_id[10].value > threshold=11390.08349609375 |
| Class: healthcare workers within 60 days after vaccination |                                                    |
|                                                            |                                                    |
| Rules_180                                                  | passed counts:1                                    |
| node_0: feature_name=HuIgG_0.10                            | feature_id[1].value > threshold=19120.166015625    |
| node_112: feature_name=a-HuIgG_0.03                        | feature_id[8].value <= threshold=19665.666015625   |
| node_113: feature_name=SARS.CoV.2.S1.mFcTag                | feature_id[3].value <= threshold=54010.166015625   |
| node_114: feature_name=SARS.CoV.2.S1+S2                    | feature_id[12].value <= threshold=47258.43359375   |
| node_115: feature_name=SARS.CoV.2.S1.RBD.mFc               | feature_id[0].value > threshold=301.73333740234375 |
| node_131: feature_name=a-HuIgG_0.03                        | feature_id[8].value > threshold=12099.83349609375  |
| node_183: feature_name=Flu.B_Phu/.HA1+HA2                  | feature_id[11].value > threshold=41918.533203125   |
| node_187: feature_name=SARS.CoV.2.Spike.RBD.rFc            | feature_id[9].value > threshold=27438.341796875    |
| node_197: feature_name=SARS.CoV.2.S2                       | feature_id[2].value <= threshold=35177.640625      |

|                                                            |                                                    |
|------------------------------------------------------------|----------------------------------------------------|
| node_198: feature_name=hCoV.HKU1.NP                        | feature_id[10].value > threshold=2645.916748046875 |
| node_210: feature_name=Flu.B_Phu/.HA1+HA2                  | feature_id[11].value <= threshold=54029.166015625  |
| node_211: feature_name=HuIgG_0.10                          | feature_id[1].value > threshold=21359.5            |
| node_213: feature_name=hCoV.NL63.S1_S2                     | feature_id[7].value > threshold=32523.4248046875   |
| node_215: feature_name=HuIgG_0.10                          | feature_id[1].value > threshold=23274.166015625    |
| node_217: feature_name=HuIgG_0.10                          | feature_id[1].value <= threshold=25231.1669921875  |
| node_218: feature_name=hCoV.HKU1.NP                        | feature_id[10].value > threshold=3712.083251953125 |
| node_220: feature_name=SARS.CoV.S1.HisTag                  | feature_id[6].value > threshold=11696.75           |
| Class: healthcare workers within 60 days after vaccination |                                                    |
|                                                            |                                                    |
| Rules_181                                                  | passed counts:1                                    |
| node_0: feature_name=HuIgG_0.10                            | feature_id[1].value > threshold=19120.166015625    |
| node_112: feature_name=a-HuIgG_0.03                        | feature_id[8].value <= threshold=19665.666015625   |
| node_113: feature_name=SARS.CoV.2.S1.mFcTag                | feature_id[3].value <= threshold=54010.166015625   |
| node_114: feature_name=SARS.CoV.2.S1+S2                    | feature_id[12].value <= threshold=47258.43359375   |
| node_115: feature_name=SARS.CoV.2.S1.RBD.mFc               | feature_id[0].value > threshold=301.73333740234375 |
| node_131: feature_name=a-HuIgG_0.03                        | feature_id[8].value > threshold=12099.83349609375  |
| node_183: feature_name=Flu.B_Phu/.HA1+HA2                  | feature_id[11].value > threshold=41918.533203125   |
| node_187: feature_name=SARS.CoV.2.Spike.RBD.rFc            | feature_id[9].value > threshold=27438.341796875    |
| node_197: feature_name=SARS.CoV.2.S2                       | feature_id[2].value <= threshold=35177.640625      |
| node_198: feature_name=hCoV.HKU1.NP                        | feature_id[10].value > threshold=2645.916748046875 |
| node_210: feature_name=Flu.B_Phu/.HA1+HA2                  | feature_id[11].value <= threshold=54029.166015625  |
| node_211: feature_name=HuIgG_0.10                          | feature_id[1].value > threshold=21359.5            |
| node_213: feature_name=hCoV.NL63.S1_S2                     | feature_id[7].value > threshold=32523.4248046875   |
| node_215: feature_name=HuIgG_0.10                          | feature_id[1].value > threshold=23274.166015625    |

|                                                         |                                                     |
|---------------------------------------------------------|-----------------------------------------------------|
| node_217: feature_name=HuIgG_0.10                       | feature_id[1].value <= threshold=25231.1669921875   |
| node_218: feature_name=hCoV.HKU1.NP                     | feature_id[10].value > threshold=3712.083251953125  |
| node_220: feature_name=SARS.CoV.S1.HisTag               | feature_id[6].value <= threshold=11696.75           |
| node_221: feature_name=MoIgA_0.10                       | feature_id[13].value > threshold=2253.6666259765625 |
| node_223: feature_name=SARS.CoV.2.S1.RBD.mFc            | feature_id[0].value > threshold=42955.33203125      |
| Class: healthcare workers 60–180 days after vaccination |                                                     |
|                                                         |                                                     |
| Rules_182                                               | passed counts:1                                     |
| node_0: feature_name=HuIgG_0.10                         | feature_id[1].value > threshold=19120.166015625     |
| node_112: feature_name=a-HuIgG_0.03                     | feature_id[8].value <= threshold=19665.666015625    |
| node_113: feature_name=SARS.CoV.2.S1.mFcTag             | feature_id[3].value <= threshold=54010.166015625    |
| node_114: feature_name=SARS.CoV.2.S1+S2                 | feature_id[12].value <= threshold=47258.43359375    |
| node_115: feature_name=SARS.CoV.2.S1.RBD.mFc            | feature_id[0].value > threshold=301.73333740234375  |
| node_131: feature_name=a-HuIgG_0.03                     | feature_id[8].value > threshold=12099.83349609375   |
| node_183: feature_name=Flu.B_Phu/.HA1+HA2               | feature_id[11].value > threshold=41918.533203125    |
| node_187: feature_name=SARS.CoV.2.Spike.RBD.rFc         | feature_id[9].value > threshold=27438.341796875     |
| node_197: feature_name=SARS.CoV.2.S2                    | feature_id[2].value <= threshold=35177.640625       |
| node_198: feature_name=hCoV.HKU1.NP                     | feature_id[10].value > threshold=2645.916748046875  |
| node_210: feature_name=Flu.B_Phu/.HA1+HA2               | feature_id[11].value <= threshold=54029.166015625   |
| node_211: feature_name=HuIgG_0.10                       | feature_id[1].value > threshold=21359.5             |
| node_213: feature_name=hCoV.NL63.S1_S2                  | feature_id[7].value > threshold=32523.4248046875    |
| node_215: feature_name=HuIgG_0.10                       | feature_id[1].value > threshold=23274.166015625     |
| node_217: feature_name=HuIgG_0.10                       | feature_id[1].value <= threshold=25231.1669921875   |
| node_218: feature_name=hCoV.HKU1.NP                     | feature_id[10].value > threshold=3712.083251953125  |
| node_220: feature_name=SARS.CoV.S1.HisTag               | feature_id[6].value <= threshold=11696.75           |

|                                                            |                                                      |
|------------------------------------------------------------|------------------------------------------------------|
| node_221: feature_name=MoIgA_0.10                          | feature_id[13].value > threshold=2253.6666259765625  |
| node_223: feature_name=SARS.CoV.2.S1.RBD.mFc               | feature_id[0].value <= threshold=42955.33203125      |
| Class: healthcare workers within 60 days after vaccination |                                                      |
|                                                            |                                                      |
| Rules_183                                                  | passed counts:1                                      |
| node_0: feature_name=HuIgG_0.10                            | feature_id[1].value > threshold=19120.166015625      |
| node_112: feature_name=a-HuIgG_0.03                        | feature_id[8].value <= threshold=19665.666015625     |
| node_113: feature_name=SARS.CoV.2.S1.mFcTag                | feature_id[3].value <= threshold=54010.166015625     |
| node_114: feature_name=SARS.CoV.2.S1+S2                    | feature_id[12].value <= threshold=47258.43359375     |
| node_115: feature_name=SARS.CoV.2.S1.RBD.mFc               | feature_id[0].value > threshold=301.73333740234375   |
| node_131: feature_name=a-HuIgG_0.03                        | feature_id[8].value > threshold=12099.83349609375    |
| node_183: feature_name=Flu.B_Phu/.HA1+HA2                  | feature_id[11].value > threshold=41918.533203125     |
| node_187: feature_name=SARS.CoV.2.Spike.RBD.rFc            | feature_id[9].value <= threshold=27438.341796875     |
| node_188: feature_name=Flu.B_Phu/.HA1+HA2                  | feature_id[11].value > threshold=48840.19921875      |
| node_192: feature_name=MoIgA_0.10                          | feature_id[13].value <= threshold=154.99999618530273 |
| node_193: feature_name=MoIgA_0.10                          | feature_id[13].value > threshold=88.99999809265137   |
| Class: unvaccinated healthcare workers                     |                                                      |
|                                                            |                                                      |
| Rules_184                                                  | passed counts:1                                      |
| node_0: feature_name=HuIgG_0.10                            | feature_id[1].value > threshold=19120.166015625      |
| node_112: feature_name=a-HuIgG_0.03                        | feature_id[8].value <= threshold=19665.666015625     |
| node_113: feature_name=SARS.CoV.2.S1.mFcTag                | feature_id[3].value <= threshold=54010.166015625     |
| node_114: feature_name=SARS.CoV.2.S1+S2                    | feature_id[12].value <= threshold=47258.43359375     |
| node_115: feature_name=SARS.CoV.2.S1.RBD.mFc               | feature_id[0].value > threshold=301.73333740234375   |
| node_131: feature_name=a-HuIgG_0.03                        | feature_id[8].value > threshold=12099.83349609375    |

|                                                            |                                                      |
|------------------------------------------------------------|------------------------------------------------------|
| node_183: feature_name=Flu.B_Phu/.HA1+HA2                  | feature_id[11].value > threshold=41918.533203125     |
| node_187: feature_name=SARS.CoV.2.Spike.RBD.rFc            | feature_id[9].value <= threshold=27438.341796875     |
| node_188: feature_name=Flu.B_Phu/.HA1+HA2                  | feature_id[11].value > threshold=48840.19921875      |
| node_192: feature_name=MoIgA_0.10                          | feature_id[13].value <= threshold=154.99999618530273 |
| node_193: feature_name=MoIgA_0.10                          | feature_id[13].value <= threshold=88.99999809265137  |
| Class: healthcare workers within 60 days after vaccination |                                                      |
|                                                            |                                                      |
| Rules_185                                                  | passed counts:1                                      |
| node_0: feature_name=HuIgG_0.10                            | feature_id[1].value > threshold=19120.166015625      |
| node_112: feature_name=a-HuIgG_0.03                        | feature_id[8].value <= threshold=19665.666015625     |
| node_113: feature_name=SARS.CoV.2.S1.mFcTag                | feature_id[3].value <= threshold=54010.166015625     |
| node_114: feature_name=SARS.CoV.2.S1+S2                    | feature_id[12].value <= threshold=47258.43359375     |
| node_115: feature_name=SARS.CoV.2.S1.RBD.mFc               | feature_id[0].value > threshold=301.73333740234375   |
| node_131: feature_name=a-HuIgG_0.03                        | feature_id[8].value > threshold=12099.83349609375    |
| node_183: feature_name=Flu.B_Phu/.HA1+HA2                  | feature_id[11].value > threshold=41918.533203125     |
| node_187: feature_name=SARS.CoV.2.Spike.RBD.rFc            | feature_id[9].value <= threshold=27438.341796875     |
| node_188: feature_name=Flu.B_Phu/.HA1+HA2                  | feature_id[11].value <= threshold=48840.19921875     |
| node_189: feature_name=SARS.CoV.2.Spike.RBD.rFc            | feature_id[9].value > threshold=22062.0673828125     |
| Class: healthcare workers over 180 days after vaccination  |                                                      |
|                                                            |                                                      |
| Rules_186                                                  | passed counts:1                                      |
| node_0: feature_name=HuIgG_0.10                            | feature_id[1].value > threshold=19120.166015625      |
| node_112: feature_name=a-HuIgG_0.03                        | feature_id[8].value <= threshold=19665.666015625     |
| node_113: feature_name=SARS.CoV.2.S1.mFcTag                | feature_id[3].value <= threshold=54010.166015625     |
| node_114: feature_name=SARS.CoV.2.S1+S2                    | feature_id[12].value <= threshold=47258.43359375     |

|                                                         |                                                    |
|---------------------------------------------------------|----------------------------------------------------|
| node_115: feature_name=SARS.CoV.2.S1.RBD.mFc            | feature_id[0].value > threshold=301.73333740234375 |
| node_131: feature_name=a-HuIgG_0.03                     | feature_id[8].value > threshold=12099.83349609375  |
| node_183: feature_name=Flu.B_Phu/.HA1+HA2               | feature_id[11].value > threshold=41918.533203125   |
| node_187: feature_name=SARS.CoV.2.Spike.RBD.rFc         | feature_id[9].value <= threshold=27438.341796875   |
| node_188: feature_name=Flu.B_Phu/.HA1+HA2               | feature_id[11].value <= threshold=48840.19921875   |
| node_189: feature_name=SARS.CoV.2.Spike.RBD.rFc         | feature_id[9].value <= threshold=22062.0673828125  |
| Class: unvaccinated healthcare workers                  |                                                    |
|                                                         |                                                    |
| Rules_187                                               | passed counts:1                                    |
| node_0: feature_name=HuIgG_0.10                         | feature_id[1].value > threshold=19120.166015625    |
| node_112: feature_name=a-HuIgG_0.03                     | feature_id[8].value <= threshold=19665.666015625   |
| node_113: feature_name=SARS.CoV.2.S1.mFcTag             | feature_id[3].value <= threshold=54010.166015625   |
| node_114: feature_name=SARS.CoV.2.S1+S2                 | feature_id[12].value <= threshold=47258.43359375   |
| node_115: feature_name=SARS.CoV.2.S1.RBD.mFc            | feature_id[0].value > threshold=301.73333740234375 |
| node_131: feature_name=a-HuIgG_0.03                     | feature_id[8].value > threshold=12099.83349609375  |
| node_183: feature_name=Flu.B_Phu/.HA1+HA2               | feature_id[11].value <= threshold=41918.533203125  |
| node_184: feature_name=a-HuIgG_0.03                     | feature_id[8].value <= threshold=14683.6669921875  |
| Class: healthcare workers 60–180 days after vaccination |                                                    |
|                                                         |                                                    |
| Rules_188                                               | passed counts:1                                    |
| node_0: feature_name=HuIgG_0.10                         | feature_id[1].value > threshold=19120.166015625    |
| node_112: feature_name=a-HuIgG_0.03                     | feature_id[8].value <= threshold=19665.666015625   |
| node_113: feature_name=SARS.CoV.2.S1.mFcTag             | feature_id[3].value <= threshold=54010.166015625   |
| node_114: feature_name=SARS.CoV.2.S1+S2                 | feature_id[12].value <= threshold=47258.43359375   |
| node_115: feature_name=SARS.CoV.2.S1.RBD.mFc            | feature_id[0].value > threshold=301.73333740234375 |

|                                                            |                                                     |
|------------------------------------------------------------|-----------------------------------------------------|
| node_131: feature_name=a-HuIgG_0.03                        | feature_id[8].value <= threshold=12099.83349609375  |
| node_132: feature_name=SARS.CoV.2.S2                       | feature_id[2].value > threshold=8858.0751953125     |
| node_134: feature_name=Flu.B_Phu/.HA1+HA2                  | feature_id[11].value > threshold=53839.16796875     |
| node_180: feature_name=a-HuIgG_0.30                        | feature_id[4].value <= threshold=40436.333984375    |
| Class: healthcare workers within 60 days after vaccination |                                                     |
|                                                            |                                                     |
| Rules_189                                                  | passed counts:1                                     |
| node_0: feature_name=HuIgG_0.10                            | feature_id[1].value > threshold=19120.166015625     |
| node_112: feature_name=a-HuIgG_0.03                        | feature_id[8].value <= threshold=19665.666015625    |
| node_113: feature_name=SARS.CoV.2.S1.mFcTag                | feature_id[3].value <= threshold=54010.166015625    |
| node_114: feature_name=SARS.CoV.2.S1+S2                    | feature_id[12].value <= threshold=47258.43359375    |
| node_115: feature_name=SARS.CoV.2.S1.RBD.mFc               | feature_id[0].value > threshold=301.73333740234375  |
| node_131: feature_name=a-HuIgG_0.03                        | feature_id[8].value <= threshold=12099.83349609375  |
| node_132: feature_name=SARS.CoV.2.S2                       | feature_id[2].value > threshold=8858.0751953125     |
| node_134: feature_name=Flu.B_Phu/.HA1+HA2                  | feature_id[11].value <= threshold=53839.16796875    |
| node_135: feature_name=hCoV.HKU1.NP                        | feature_id[10].value > threshold=1010.1666564941406 |
| node_145: feature_name=hCoV.HKU1.NP                        | feature_id[10].value > threshold=15374.16650390625  |
| node_177: feature_name=a-HuIgG_0.03                        | feature_id[8].value > threshold=11866.5             |
| Class: healthcare workers within 60 days after vaccination |                                                     |
|                                                            |                                                     |
| Rules_190                                                  | passed counts:1                                     |
| node_0: feature_name=HuIgG_0.10                            | feature_id[1].value > threshold=19120.166015625     |
| node_112: feature_name=a-HuIgG_0.03                        | feature_id[8].value <= threshold=19665.666015625    |
| node_113: feature_name=SARS.CoV.2.S1.mFcTag                | feature_id[3].value <= threshold=54010.166015625    |
| node_114: feature_name=SARS.CoV.2.S1+S2                    | feature_id[12].value <= threshold=47258.43359375    |



|                                                            |                                                     |
|------------------------------------------------------------|-----------------------------------------------------|
| node_115: feature_name=SARS.CoV.2.S1.RBD.mFc               | feature_id[0].value > threshold=301.73333740234375  |
| node_131: feature_name=a-HuIgG_0.03                        | feature_id[8].value <= threshold=12099.83349609375  |
| node_132: feature_name=SARS.CoV.2.S2                       | feature_id[2].value > threshold=8858.0751953125     |
| node_134: feature_name=Flu.B_Phu/.HA1+HA2                  | feature_id[11].value <= threshold=53839.16796875    |
| node_135: feature_name=hCoV.HKU1.NP                        | feature_id[10].value > threshold=1010.1666564941406 |
| node_145: feature_name=hCoV.HKU1.NP                        | feature_id[10].value <= threshold=15374.16650390625 |
| node_146: feature_name=SARS.CoV.2.S1.mFcTag                | feature_id[3].value > threshold=50683.0             |
| node_168: feature_name=HuIgG_0.10                          | feature_id[1].value > threshold=20669.833984375     |
| node_170: feature_name=SARS.CoV.2.S1.mFcTag                | feature_id[3].value > threshold=50874.666015625     |
| node_172: feature_name=SARS.CoV.S1.HisTag                  | feature_id[6].value <= threshold=3796.25            |
| node_173: feature_name=a-HuIgG_0.03                        | feature_id[8].value <= threshold=10618.0            |
| Class: healthcare workers within 60 days after vaccination |                                                     |
|                                                            |                                                     |
| Rules_191                                                  | passed counts:1                                     |
| node_0: feature_name=HuIgG_0.10                            | feature_id[1].value > threshold=19120.166015625     |
| node_112: feature_name=a-HuIgG_0.03                        | feature_id[8].value <= threshold=19665.666015625    |
| node_113: feature_name=SARS.CoV.2.S1.mFcTag                | feature_id[3].value <= threshold=54010.166015625    |
| node_114: feature_name=SARS.CoV.2.S1+S2                    | feature_id[12].value <= threshold=47258.43359375    |
| node_115: feature_name=SARS.CoV.2.S1.RBD.mFc               | feature_id[0].value > threshold=301.73333740234375  |
| node_131: feature_name=a-HuIgG_0.03                        | feature_id[8].value <= threshold=12099.83349609375  |
| node_132: feature_name=SARS.CoV.2.S2                       | feature_id[2].value > threshold=8858.0751953125     |
| node_134: feature_name=Flu.B_Phu/.HA1+HA2                  | feature_id[11].value <= threshold=53839.16796875    |
| node_135: feature_name=hCoV.HKU1.NP                        | feature_id[10].value > threshold=1010.1666564941406 |
| node_145: feature_name=hCoV.HKU1.NP                        | feature_id[10].value <= threshold=15374.16650390625 |
| node_146: feature_name=SARS.CoV.2.S1.mFcTag                | feature_id[3].value <= threshold=50683.0            |

|                                                           |                                                     |
|-----------------------------------------------------------|-----------------------------------------------------|
| node_147: feature_name=SARS.CoV.2.Spike.RBD.rFc           | feature_id[9].value > threshold=45822.583984375     |
| Class: healthcare workers 60–180 days after vaccination   |                                                     |
|                                                           |                                                     |
| Rules_192                                                 | passed counts:1                                     |
| node_0: feature_name=HuIgG_0.10                           | feature_id[1].value > threshold=19120.166015625     |
| node_112: feature_name=a-HuIgG_0.03                       | feature_id[8].value <= threshold=19665.666015625    |
| node_113: feature_name=SARS.CoV.2.S1.mFcTag               | feature_id[3].value <= threshold=54010.166015625    |
| node_114: feature_name=SARS.CoV.2.S1+S2                   | feature_id[12].value <= threshold=47258.43359375    |
| node_115: feature_name=SARS.CoV.2.S1.RBD.mFc              | feature_id[0].value > threshold=301.73333740234375  |
| node_131: feature_name=a-HuIgG_0.03                       | feature_id[8].value <= threshold=12099.83349609375  |
| node_132: feature_name=SARS.CoV.2.S2                      | feature_id[2].value > threshold=8858.0751953125     |
| node_134: feature_name=Flu.B_Phu/.HA1+HA2                 | feature_id[11].value <= threshold=53839.16796875    |
| node_135: feature_name=hCoV.HKU1.NP                       | feature_id[10].value > threshold=1010.1666564941406 |
| node_145: feature_name=hCoV.HKU1.NP                       | feature_id[10].value <= threshold=15374.16650390625 |
| node_146: feature_name=SARS.CoV.2.S1.mFcTag               | feature_id[3].value <= threshold=50683.0            |
| node_147: feature_name=SARS.CoV.2.Spike.RBD.rFc           | feature_id[9].value <= threshold=45822.583984375    |
| node_148: feature_name=SARS.CoV.2.S2                      | feature_id[2].value > threshold=10212.125           |
| node_154: feature_name=Flu.B_Phu/.HA1+HA2                 | feature_id[11].value > threshold=49488.1171875      |
| node_162: feature_name=MoIgA_0.10                         | feature_id[13].value > threshold=2877.1666259765625 |
| node_164: feature_name=SARS.CoV.2.Spike.RBD.rFc           | feature_id[9].value > threshold=38138.451171875     |
| Class: healthcare workers over 180 days after vaccination |                                                     |
|                                                           |                                                     |
| Rules_193                                                 | passed counts:1                                     |
| node_0: feature_name=HuIgG_0.10                           | feature_id[1].value > threshold=19120.166015625     |
| node_112: feature_name=a-HuIgG_0.03                       | feature_id[8].value <= threshold=19665.666015625    |

|                                                         |                                                     |
|---------------------------------------------------------|-----------------------------------------------------|
| node_113: feature_name=SARS.CoV.2.S1.mFcTag             | feature_id[3].value <= threshold=54010.166015625    |
| node_114: feature_name=SARS.CoV.2.S1+S2                 | feature_id[12].value <= threshold=47258.43359375    |
| node_115: feature_name=SARS.CoV.2.S1.RBD.mFc            | feature_id[0].value > threshold=301.73333740234375  |
| node_131: feature_name=a-HuIgG_0.03                     | feature_id[8].value <= threshold=12099.83349609375  |
| node_132: feature_name=SARS.CoV.2.S2                    | feature_id[2].value > threshold=8858.0751953125     |
| node_134: feature_name=Flu.B_Phu/.HA1+HA2               | feature_id[11].value <= threshold=53839.16796875    |
| node_135: feature_name=hCoV.HKU1.NP                     | feature_id[10].value > threshold=1010.1666564941406 |
| node_145: feature_name=hCoV.HKU1.NP                     | feature_id[10].value <= threshold=15374.16650390625 |
| node_146: feature_name=SARS.CoV.2.S1.mFcTag             | feature_id[3].value <= threshold=50683.0            |
| node_147: feature_name=SARS.CoV.2.Spike.RBD.rFc         | feature_id[9].value <= threshold=45822.583984375    |
| node_148: feature_name=SARS.CoV.2.S2                    | feature_id[2].value > threshold=10212.125           |
| node_154: feature_name=Flu.B_Phu/.HA1+HA2               | feature_id[11].value <= threshold=49488.1171875     |
| node_155: feature_name=MoIgA_0.10                       | feature_id[13].value > threshold=177.66666412353516 |
| node_157: feature_name=a-HuIgG_0.03                     | feature_id[8].value > threshold=11251.0             |
| node_159: feature_name=SARS.CoV.S1.HisTag               | feature_id[6].value > threshold=5051.91650390625    |
| Class: healthcare workers 60–180 days after vaccination |                                                     |
|                                                         |                                                     |
| Rules_194                                               | passed counts:1                                     |
| node_0: feature_name=HuIgG_0.10                         | feature_id[1].value > threshold=19120.166015625     |
| node_112: feature_name=a-HuIgG_0.03                     | feature_id[8].value <= threshold=19665.666015625    |
| node_113: feature_name=SARS.CoV.2.S1.mFcTag             | feature_id[3].value <= threshold=54010.166015625    |
| node_114: feature_name=SARS.CoV.2.S1+S2                 | feature_id[12].value <= threshold=47258.43359375    |
| node_115: feature_name=SARS.CoV.2.S1.RBD.mFc            | feature_id[0].value > threshold=301.73333740234375  |
| node_131: feature_name=a-HuIgG_0.03                     | feature_id[8].value <= threshold=12099.83349609375  |
| node_132: feature_name=SARS.CoV.2.S2                    | feature_id[2].value > threshold=8858.0751953125     |

|                                                            |                                                     |
|------------------------------------------------------------|-----------------------------------------------------|
| node_134: feature_name=Flu.B_Phu/.HA1+HA2                  | feature_id[11].value <= threshold=53839.16796875    |
| node_135: feature_name=hCoV.HKU1.NP                        | feature_id[10].value > threshold=1010.1666564941406 |
| node_145: feature_name=hCoV.HKU1.NP                        | feature_id[10].value <= threshold=15374.16650390625 |
| node_146: feature_name=SARS.CoV.2.S1.mFcTag                | feature_id[3].value <= threshold=50683.0            |
| node_147: feature_name=SARS.CoV.2.Spike.RBD.rFc            | feature_id[9].value <= threshold=45822.583984375    |
| node_148: feature_name=SARS.CoV.2.S2                       | feature_id[2].value > threshold=10212.125           |
| node_154: feature_name=Flu.B_Phu/.HA1+HA2                  | feature_id[11].value <= threshold=49488.1171875     |
| node_155: feature_name=MoIgA_0.10                          | feature_id[13].value > threshold=177.66666412353516 |
| node_157: feature_name=a-HuIgG_0.03                        | feature_id[8].value > threshold=11251.0             |
| node_159: feature_name=SARS.CoV.S1.HisTag                  | feature_id[6].value <= threshold=5051.91650390625   |
| Class: healthcare workers within 60 days after vaccination |                                                     |
|                                                            |                                                     |
| Rules_195                                                  | passed counts:1                                     |
| node_0: feature_name=HuIgG_0.10                            | feature_id[1].value > threshold=19120.166015625     |
| node_112: feature_name=a-HuIgG_0.03                        | feature_id[8].value <= threshold=19665.666015625    |
| node_113: feature_name=SARS.CoV.2.S1.mFcTag                | feature_id[3].value <= threshold=54010.166015625    |
| node_114: feature_name=SARS.CoV.2.S1+S2                    | feature_id[12].value <= threshold=47258.43359375    |
| node_115: feature_name=SARS.CoV.2.S1.RBD.mFc               | feature_id[0].value > threshold=301.73333740234375  |
| node_131: feature_name=a-HuIgG_0.03                        | feature_id[8].value <= threshold=12099.83349609375  |
| node_132: feature_name=SARS.CoV.2.S2                       | feature_id[2].value > threshold=8858.0751953125     |
| node_134: feature_name=Flu.B_Phu/.HA1+HA2                  | feature_id[11].value <= threshold=53839.16796875    |
| node_135: feature_name=hCoV.HKU1.NP                        | feature_id[10].value > threshold=1010.1666564941406 |
| node_145: feature_name=hCoV.HKU1.NP                        | feature_id[10].value <= threshold=15374.16650390625 |
| node_146: feature_name=SARS.CoV.2.S1.mFcTag                | feature_id[3].value <= threshold=50683.0            |
| node_147: feature_name=SARS.CoV.2.Spike.RBD.rFc            | feature_id[9].value <= threshold=45822.583984375    |

|                                                            |                                                      |
|------------------------------------------------------------|------------------------------------------------------|
| node_148: feature_name=SARS.CoV.2.S2                       | feature_id[2].value <= threshold=10212.125           |
| node_149: feature_name=HuIgG_0.03                          | feature_id[5].value > threshold=4160.666748046875    |
| node_151: feature_name=SARS.CoV.2.Spike.RBD.rFc            | feature_id[9].value <= threshold=20605.1162109375    |
| Class: healthcare workers within 60 days after vaccination |                                                      |
|                                                            |                                                      |
| Rules_196                                                  | passed counts:1                                      |
| node_0: feature_name=HuIgG_0.10                            | feature_id[1].value > threshold=19120.166015625      |
| node_112: feature_name=a-HuIgG_0.03                        | feature_id[8].value <= threshold=19665.666015625     |
| node_113: feature_name=SARS.CoV.2.S1.mFcTag                | feature_id[3].value <= threshold=54010.166015625     |
| node_114: feature_name=SARS.CoV.2.S1+S2                    | feature_id[12].value <= threshold=47258.43359375     |
| node_115: feature_name=SARS.CoV.2.S1.RBD.mFc               | feature_id[0].value > threshold=301.73333740234375   |
| node_131: feature_name=a-HuIgG_0.03                        | feature_id[8].value <= threshold=12099.83349609375   |
| node_132: feature_name=SARS.CoV.2.S2                       | feature_id[2].value > threshold=8858.0751953125      |
| node_134: feature_name=Flu.B_Phu/.HA1+HA2                  | feature_id[11].value <= threshold=53839.16796875     |
| node_135: feature_name=hCoV.HKU1.NP                        | feature_id[10].value <= threshold=1010.1666564941406 |
| node_136: feature_name=MoIgA_0.10                          | feature_id[13].value > threshold=497.8333282470703   |
| node_142: feature_name=SARS.CoV.2.S1.mFcTag                | feature_id[3].value > threshold=50462.283203125      |
| Class: healthcare workers within 60 days after vaccination |                                                      |
|                                                            |                                                      |
| Rules_197                                                  | passed counts:1                                      |
| node_0: feature_name=HuIgG_0.10                            | feature_id[1].value > threshold=19120.166015625      |
| node_112: feature_name=a-HuIgG_0.03                        | feature_id[8].value <= threshold=19665.666015625     |
| node_113: feature_name=SARS.CoV.2.S1.mFcTag                | feature_id[3].value <= threshold=54010.166015625     |
| node_114: feature_name=SARS.CoV.2.S1+S2                    | feature_id[12].value <= threshold=47258.43359375     |
| node_115: feature_name=SARS.CoV.2.S1.RBD.mFc               | feature_id[0].value > threshold=301.73333740234375   |

|                                                            |                                                      |
|------------------------------------------------------------|------------------------------------------------------|
| node_131: feature_name=a-HuIgG_0.03                        | feature_id[8].value <= threshold=12099.83349609375   |
| node_132: feature_name=SARS.CoV.2.S2                       | feature_id[2].value > threshold=8858.0751953125      |
| node_134: feature_name=Flu.B_Phu/.HA1+HA2                  | feature_id[11].value <= threshold=53839.16796875     |
| node_135: feature_name=hCoV.HKU1.NP                        | feature_id[10].value <= threshold=1010.1666564941406 |
| node_136: feature_name=MoIgA_0.10                          | feature_id[13].value <= threshold=497.8333282470703  |
| node_137: feature_name=MoIgA_0.10                          | feature_id[13].value <= threshold=153.0              |
| node_138: feature_name=SARS.CoV.S1.HisTag                  | feature_id[6].value > threshold=14632.4169921875     |
| Class: healthcare workers within 60 days after vaccination |                                                      |
|                                                            |                                                      |
| Rules_198                                                  | passed counts:1                                      |
| node_0: feature_name=HuIgG_0.10                            | feature_id[1].value > threshold=19120.166015625      |
| node_112: feature_name=a-HuIgG_0.03                        | feature_id[8].value <= threshold=19665.666015625     |
| node_113: feature_name=SARS.CoV.2.S1.mFcTag                | feature_id[3].value <= threshold=54010.166015625     |
| node_114: feature_name=SARS.CoV.2.S1+S2                    | feature_id[12].value <= threshold=47258.43359375     |
| node_115: feature_name=SARS.CoV.2.S1.RBD.mFc               | feature_id[0].value <= threshold=301.73333740234375  |
| node_116: feature_name=SARS.CoV.2.S1+S2                    | feature_id[12].value <= threshold=3298.25            |
| node_117: feature_name=a-HuIgG_0.30                        | feature_id[4].value <= threshold=2425.3333129882812  |
| node_118: feature_name=SARS.CoV.2.S2                       | feature_id[2].value > threshold=-520.3333435058594   |
| Class: healthcare workers 60–180 days after vaccination    |                                                      |
|                                                            |                                                      |
| Rules_199                                                  | passed counts:1                                      |
| node_0: feature_name=HuIgG_0.10                            | feature_id[1].value > threshold=19120.166015625      |
| node_112: feature_name=a-HuIgG_0.03                        | feature_id[8].value <= threshold=19665.666015625     |
| node_113: feature_name=SARS.CoV.2.S1.mFcTag                | feature_id[3].value <= threshold=54010.166015625     |
| node_114: feature_name=SARS.CoV.2.S1+S2                    | feature_id[12].value <= threshold=47258.43359375     |

|                                                           |                                                     |
|-----------------------------------------------------------|-----------------------------------------------------|
| node_115: feature_name=SARS.CoV.2.S1.RBD.mFc              | feature_id[0].value <= threshold=301.73333740234375 |
| node_116: feature_name=SARS.CoV.2.S1+S2                   | feature_id[12].value <= threshold=3298.25           |
| node_117: feature_name=a-HuIgG_0.30                       | feature_id[4].value <= threshold=2425.3333129882812 |
| node_118: feature_name=SARS.CoV.2.S2                      | feature_id[2].value <= threshold=-520.3333435058594 |
| Class: healthcare workers over 180 days after vaccination |                                                     |
|                                                           |                                                     |
| Rules_200                                                 | passed counts:1                                     |
| node_0: feature_name=HuIgG_0.10                           | feature_id[1].value <= threshold=19120.166015625    |
| node_1: feature_name=SARS.CoV.2.S1.mFcTag                 | feature_id[3].value > threshold=5354.388916015625   |
| node_9: feature_name=a-HuIgG_0.30                         | feature_id[4].value > threshold=33726.833984375     |
| node_55: feature_name=SARS.CoV.2.S1.mFcTag                | feature_id[3].value > threshold=43185.68359375      |
| node_67: feature_name=a-HuIgG_0.03                        | feature_id[8].value > threshold=10858.0             |
| node_83: feature_name=HuIgG_0.03                          | feature_id[5].value > threshold=3796.0              |
| node_103: feature_name=SARS.CoV.2.S1+S2                   | feature_id[12].value > threshold=49967.91796875     |
| node_107: feature_name=hCoV.NL63.S1_S2                    | feature_id[7].value <= threshold=28891.8330078125   |
| node_108: feature_name=HuIgG_0.10                         | feature_id[1].value > threshold=19058.166015625     |
| Class: healthcare workers over 180 days after vaccination |                                                     |
|                                                           |                                                     |
| Rules_201                                                 | passed counts:1                                     |
| node_0: feature_name=HuIgG_0.10                           | feature_id[1].value <= threshold=19120.166015625    |
| node_1: feature_name=SARS.CoV.2.S1.mFcTag                 | feature_id[3].value > threshold=5354.388916015625   |
| node_9: feature_name=a-HuIgG_0.30                         | feature_id[4].value > threshold=33726.833984375     |
| node_55: feature_name=SARS.CoV.2.S1.mFcTag                | feature_id[3].value > threshold=43185.68359375      |
| node_67: feature_name=a-HuIgG_0.03                        | feature_id[8].value > threshold=10858.0             |
| node_83: feature_name=HuIgG_0.03                          | feature_id[5].value > threshold=3796.0              |

|                                                            |                                                   |
|------------------------------------------------------------|---------------------------------------------------|
| node_103: feature_name=SARS.CoV.2.S1+S2                    | feature_id[12].value > threshold=49967.91796875   |
| node_107: feature_name=hCoV.NL63.S1_S2                     | feature_id[7].value <= threshold=28891.8330078125 |
| node_108: feature_name=HuIgG_0.10                          | feature_id[1].value <= threshold=19058.166015625  |
| Class: healthcare workers 60–180 days after vaccination    |                                                   |
|                                                            |                                                   |
| Rules_202                                                  | passed counts:1                                   |
| node_0: feature_name=HuIgG_0.10                            | feature_id[1].value <= threshold=19120.166015625  |
| node_1: feature_name=SARS.CoV.2.S1.mFcTag                  | feature_id[3].value > threshold=5354.388916015625 |
| node_9: feature_name=a-HuIgG_0.30                          | feature_id[4].value > threshold=33726.833984375   |
| node_55: feature_name=SARS.CoV.2.S1.mFcTag                 | feature_id[3].value > threshold=43185.68359375    |
| node_67: feature_name=a-HuIgG_0.03                         | feature_id[8].value > threshold=10858.0           |
| node_83: feature_name=HuIgG_0.03                           | feature_id[5].value > threshold=3796.0            |
| node_103: feature_name=SARS.CoV.2.S1+S2                    | feature_id[12].value <= threshold=49967.91796875  |
| node_104: feature_name=HuIgG_0.10                          | feature_id[1].value <= threshold=17143.833984375  |
| Class: healthcare workers within 60 days after vaccination |                                                   |
|                                                            |                                                   |
| Rules_203                                                  | passed counts:1                                   |
| node_0: feature_name=HuIgG_0.10                            | feature_id[1].value <= threshold=19120.166015625  |
| node_1: feature_name=SARS.CoV.2.S1.mFcTag                  | feature_id[3].value > threshold=5354.388916015625 |
| node_9: feature_name=a-HuIgG_0.30                          | feature_id[4].value > threshold=33726.833984375   |
| node_55: feature_name=SARS.CoV.2.S1.mFcTag                 | feature_id[3].value > threshold=43185.68359375    |
| node_67: feature_name=a-HuIgG_0.03                         | feature_id[8].value > threshold=10858.0           |
| node_83: feature_name=HuIgG_0.03                           | feature_id[5].value <= threshold=3796.0           |
| node_84: feature_name=hCoV.NL63.S1_S2                      | feature_id[7].value > threshold=29814.5           |
| node_96: feature_name=hCoV.NL63.S1_S2                      | feature_id[7].value > threshold=34078.0           |



|                                                         |                                                   |
|---------------------------------------------------------|---------------------------------------------------|
| node_98: feature_name=SARS.CoV.S1.HisTag                | feature_id[6].value > threshold=9674.150390625    |
| node_100: feature_name=SARS.CoV.2.S1.mFcTag             | feature_id[3].value > threshold=55180.015625      |
| Class: healthcare workers 60–180 days after vaccination |                                                   |
|                                                         |                                                   |
| Rules_204                                               | passed counts:1                                   |
| node_0: feature_name=HuIgG_0.10                         | feature_id[1].value <= threshold=19120.166015625  |
| node_1: feature_name=SARS.CoV.2.S1.mFcTag               | feature_id[3].value > threshold=5354.388916015625 |
| node_9: feature_name=a-HuIgG_0.30                       | feature_id[4].value > threshold=33726.833984375   |
| node_55: feature_name=SARS.CoV.2.S1.mFcTag              | feature_id[3].value > threshold=43185.68359375    |
| node_67: feature_name=a-HuIgG_0.03                      | feature_id[8].value > threshold=10858.0           |
| node_83: feature_name=HuIgG_0.03                        | feature_id[5].value <= threshold=3796.0           |
| node_84: feature_name=hCoV.NL63.S1_S2                   | feature_id[7].value <= threshold=29814.5          |
| node_85: feature_name=hCoV.NL63.S1_S2                   | feature_id[7].value > threshold=22280.4169921875  |
| node_89: feature_name=Flu.B_Phu/.HA1+HA2                | feature_id[11].value > threshold=41117.93359375   |
| node_91: feature_name=SARS.CoV.S1.HisTag                | feature_id[6].value > threshold=18680.75          |
| node_93: feature_name=SARS.CoV.2.S1.mFcTag              | feature_id[3].value > threshold=53523.583984375   |
| Class: healthcare workers 60–180 days after vaccination |                                                   |
|                                                         |                                                   |
| Rules_205                                               | passed counts:1                                   |
| node_0: feature_name=HuIgG_0.10                         | feature_id[1].value <= threshold=19120.166015625  |
| node_1: feature_name=SARS.CoV.2.S1.mFcTag               | feature_id[3].value > threshold=5354.388916015625 |
| node_9: feature_name=a-HuIgG_0.30                       | feature_id[4].value > threshold=33726.833984375   |
| node_55: feature_name=SARS.CoV.2.S1.mFcTag              | feature_id[3].value > threshold=43185.68359375    |
| node_67: feature_name=a-HuIgG_0.03                      | feature_id[8].value > threshold=10858.0           |
| node_83: feature_name=HuIgG_0.03                        | feature_id[5].value <= threshold=3796.0           |

|                                                           |                                                   |
|-----------------------------------------------------------|---------------------------------------------------|
| node_84: feature_name=hCoV.NL63.S1_S2                     | feature_id[7].value <= threshold=29814.5          |
| node_85: feature_name=hCoV.NL63.S1_S2                     | feature_id[7].value > threshold=22280.4169921875  |
| node_89: feature_name=Flu.B_Phu/.HA1+HA2                  | feature_id[11].value > threshold=41117.93359375   |
| node_91: feature_name=SARS.CoV.S1.HisTag                  | feature_id[6].value > threshold=18680.75          |
| node_93: feature_name=SARS.CoV.2.S1.mFcTag                | feature_id[3].value <= threshold=53523.583984375  |
| Class: healthcare workers over 180 days after vaccination |                                                   |
|                                                           |                                                   |
| Rules_206                                                 | passed counts:1                                   |
| node_0: feature_name=HuIgG_0.10                           | feature_id[1].value <= threshold=19120.166015625  |
| node_1: feature_name=SARS.CoV.2.S1.mFcTag                 | feature_id[3].value > threshold=5354.388916015625 |
| node_9: feature_name=a-HuIgG_0.30                         | feature_id[4].value > threshold=33726.833984375   |
| node_55: feature_name=SARS.CoV.2.S1.mFcTag                | feature_id[3].value > threshold=43185.68359375    |
| node_67: feature_name=a-HuIgG_0.03                        | feature_id[8].value > threshold=10858.0           |
| node_83: feature_name=HuIgG_0.03                          | feature_id[5].value <= threshold=3796.0           |
| node_84: feature_name=hCoV.NL63.S1_S2                     | feature_id[7].value <= threshold=29814.5          |
| node_85: feature_name=hCoV.NL63.S1_S2                     | feature_id[7].value > threshold=22280.4169921875  |
| node_89: feature_name=Flu.B_Phu/.HA1+HA2                  | feature_id[11].value <= threshold=41117.93359375  |
| Class: healthcare workers over 180 days after vaccination |                                                   |
|                                                           |                                                   |
| Rules_207                                                 | passed counts:1                                   |
| node_0: feature_name=HuIgG_0.10                           | feature_id[1].value <= threshold=19120.166015625  |
| node_1: feature_name=SARS.CoV.2.S1.mFcTag                 | feature_id[3].value > threshold=5354.388916015625 |
| node_9: feature_name=a-HuIgG_0.30                         | feature_id[4].value > threshold=33726.833984375   |
| node_55: feature_name=SARS.CoV.2.S1.mFcTag                | feature_id[3].value > threshold=43185.68359375    |
| node_67: feature_name=a-HuIgG_0.03                        | feature_id[8].value > threshold=10858.0           |

|                                                           |                                                      |
|-----------------------------------------------------------|------------------------------------------------------|
| node_83: feature_name=HuIgG_0.03                          | feature_id[5].value <= threshold=3796.0              |
| node_84: feature_name=hCoV.NL63.S1_S2                     | feature_id[7].value <= threshold=29814.5             |
| node_85: feature_name=hCoV.NL63.S1_S2                     | feature_id[7].value <= threshold=22280.4169921875    |
| node_86: feature_name=Flu.B_Phu/.HA1+HA2                  | feature_id[11].value > threshold=50957.43359375      |
| Class: healthcare workers 60–180 days after vaccination   |                                                      |
|                                                           |                                                      |
| Rules_208                                                 | passed counts:1                                      |
| node_0: feature_name=HuIgG_0.10                           | feature_id[1].value <= threshold=19120.166015625     |
| node_1: feature_name=SARS.CoV.2.S1.mFcTag                 | feature_id[3].value > threshold=5354.388916015625    |
| node_9: feature_name=a-HuIgG_0.30                         | feature_id[4].value > threshold=33726.833984375      |
| node_55: feature_name=SARS.CoV.2.S1.mFcTag                | feature_id[3].value > threshold=43185.68359375       |
| node_67: feature_name=a-HuIgG_0.03                        | feature_id[8].value <= threshold=10858.0             |
| node_68: feature_name=MoIgA_0.10                          | feature_id[13].value > threshold=246.83333587646484  |
| node_76: feature_name=SARS.CoV.2.Spike.RBD.rFc            | feature_id[9].value > threshold=54060.41796875       |
| Class: healthcare workers over 180 days after vaccination |                                                      |
|                                                           |                                                      |
| Rules_209                                                 | passed counts:1                                      |
| node_0: feature_name=HuIgG_0.10                           | feature_id[1].value <= threshold=19120.166015625     |
| node_1: feature_name=SARS.CoV.2.S1.mFcTag                 | feature_id[3].value > threshold=5354.388916015625    |
| node_9: feature_name=a-HuIgG_0.30                         | feature_id[4].value > threshold=33726.833984375      |
| node_55: feature_name=SARS.CoV.2.S1.mFcTag                | feature_id[3].value > threshold=43185.68359375       |
| node_67: feature_name=a-HuIgG_0.03                        | feature_id[8].value <= threshold=10858.0             |
| node_68: feature_name=MoIgA_0.10                          | feature_id[13].value <= threshold=246.83333587646484 |
| node_69: feature_name=hCoV.HKU1.NP                        | feature_id[10].value > threshold=1960.7500610351562  |
| node_73: feature_name=hCoV.NL63.S1_S2                     | feature_id[7].value <= threshold=25846.875           |

|                                                            |                                                      |
|------------------------------------------------------------|------------------------------------------------------|
| Class: healthcare workers within 60 days after vaccination |                                                      |
|                                                            |                                                      |
| Rules_210                                                  | passed counts:1                                      |
| node_0: feature_name=HuIgG_0.10                            | feature_id[1].value <= threshold=19120.166015625     |
| node_1: feature_name=SARS.CoV.2.S1.mFcTag                  | feature_id[3].value > threshold=5354.388916015625    |
| node_9: feature_name=a-HuIgG_0.30                          | feature_id[4].value > threshold=33726.833984375      |
| node_55: feature_name=SARS.CoV.2.S1.mFcTag                 | feature_id[3].value > threshold=43185.68359375       |
| node_67: feature_name=a-HuIgG_0.03                         | feature_id[8].value <= threshold=10858.0             |
| node_68: feature_name=MoIgA_0.10                           | feature_id[13].value <= threshold=246.83333587646484 |
| node_69: feature_name=hCoV.HKU1.NP                         | feature_id[10].value <= threshold=1960.7500610351562 |
| node_70: feature_name=hCoV.HKU1.NP                         | feature_id[10].value <= threshold=1023.75            |
| Class: healthcare workers over 180 days after vaccination  |                                                      |
|                                                            |                                                      |
| Rules_211                                                  | passed counts:1                                      |
| node_0: feature_name=HuIgG_0.10                            | feature_id[1].value <= threshold=19120.166015625     |
| node_1: feature_name=SARS.CoV.2.S1.mFcTag                  | feature_id[3].value > threshold=5354.388916015625    |
| node_9: feature_name=a-HuIgG_0.30                          | feature_id[4].value > threshold=33726.833984375      |
| node_55: feature_name=SARS.CoV.2.S1.mFcTag                 | feature_id[3].value <= threshold=43185.68359375      |
| node_56: feature_name=SARS.CoV.S1.HisTag                   | feature_id[6].value > threshold=1493.4166870117188   |
| node_62: feature_name=SARS.CoV.2.S1+S2                     | feature_id[12].value <= threshold=22078.1669921875   |
| node_63: feature_name=SARS.CoV.2.S1+S2                     | feature_id[12].value > threshold=21810.333984375     |
| Class: healthcare workers 60–180 days after vaccination    |                                                      |
|                                                            |                                                      |
| Rules_212                                                  | passed counts:1                                      |
| node_0: feature_name=HuIgG_0.10                            | feature_id[1].value <= threshold=19120.166015625     |

|                                                           |                                                     |
|-----------------------------------------------------------|-----------------------------------------------------|
| node_1: feature_name=SARS.CoV.2.S1.mFcTag                 | feature_id[3].value > threshold=5354.388916015625   |
| node_9: feature_name=a-HuIgG_0.30                         | feature_id[4].value > threshold=33726.833984375     |
| node_55: feature_name=SARS.CoV.2.S1.mFcTag                | feature_id[3].value <= threshold=43185.68359375     |
| node_56: feature_name=SARS.CoV.S1.HisTag                  | feature_id[6].value <= threshold=1493.4166870117188 |
| node_57: feature_name=SARS.CoV.2.S1.mFcTag                | feature_id[3].value <= threshold=24427.2880859375   |
| node_58: feature_name=HuIgG_0.03                          | feature_id[5].value > threshold=1711.6666870117188  |
| Class: healthcare workers over 180 days after vaccination |                                                     |
|                                                           |                                                     |
| Rules_213                                                 | passed counts:1                                     |
| node_0: feature_name=HuIgG_0.10                           | feature_id[1].value <= threshold=19120.166015625    |
| node_1: feature_name=SARS.CoV.2.S1.mFcTag                 | feature_id[3].value > threshold=5354.388916015625   |
| node_9: feature_name=a-HuIgG_0.30                         | feature_id[4].value > threshold=33726.833984375     |
| node_55: feature_name=SARS.CoV.2.S1.mFcTag                | feature_id[3].value <= threshold=43185.68359375     |
| node_56: feature_name=SARS.CoV.S1.HisTag                  | feature_id[6].value <= threshold=1493.4166870117188 |
| node_57: feature_name=SARS.CoV.2.S1.mFcTag                | feature_id[3].value <= threshold=24427.2880859375   |
| node_58: feature_name=HuIgG_0.03                          | feature_id[5].value <= threshold=1711.6666870117188 |
| Class: healthcare workers 60–180 days after vaccination   |                                                     |
|                                                           |                                                     |
| Rules_214                                                 | passed counts:1                                     |
| node_0: feature_name=HuIgG_0.10                           | feature_id[1].value <= threshold=19120.166015625    |
| node_1: feature_name=SARS.CoV.2.S1.mFcTag                 | feature_id[3].value > threshold=5354.388916015625   |
| node_9: feature_name=a-HuIgG_0.30                         | feature_id[4].value <= threshold=33726.833984375    |
| node_10: feature_name=HuIgG_0.03                          | feature_id[5].value > threshold=1023.1666564941406  |
| node_20: feature_name=hCoV.HKU1.NP                        | feature_id[10].value > threshold=-20.05833387374878 |
| node_22: feature_name=SARS.CoV.S1.HisTag                  | feature_id[6].value > threshold=400.3000030517578   |

|                                                            |                                                     |
|------------------------------------------------------------|-----------------------------------------------------|
| node_26: feature_name=SARS.CoV.S1.HisTag                   | feature_id[6].value > threshold=15087.41650390625   |
| node_38: feature_name=hCoV.HKU1.NP                         | feature_id[10].value > threshold=348.6666564941406  |
| node_46: feature_name=SARS.CoV.2.S2                        | feature_id[2].value > threshold=21127.650390625     |
| node_50: feature_name=a-HuIgG_0.03                         | feature_id[8].value > threshold=11226.33349609375   |
| node_52: feature_name=a-HuIgG_0.03                         | feature_id[8].value > threshold=11766.0             |
| Class: healthcare workers 60–180 days after vaccination    |                                                     |
|                                                            |                                                     |
| Rules_215                                                  | passed counts:1                                     |
| node_0: feature_name=HuIgG_0.10                            | feature_id[1].value <= threshold=19120.166015625    |
| node_1: feature_name=SARS.CoV.2.S1.mFcTag                  | feature_id[3].value > threshold=5354.388916015625   |
| node_9: feature_name=a-HuIgG_0.30                          | feature_id[4].value <= threshold=33726.833984375    |
| node_10: feature_name=HuIgG_0.03                           | feature_id[5].value > threshold=1023.1666564941406  |
| node_20: feature_name=hCoV.HKU1.NP                         | feature_id[10].value > threshold=-20.05833387374878 |
| node_22: feature_name=SARS.CoV.S1.HisTag                   | feature_id[6].value > threshold=400.3000030517578   |
| node_26: feature_name=SARS.CoV.S1.HisTag                   | feature_id[6].value > threshold=15087.41650390625   |
| node_38: feature_name=hCoV.HKU1.NP                         | feature_id[10].value > threshold=348.6666564941406  |
| node_46: feature_name=SARS.CoV.2.S2                        | feature_id[2].value > threshold=21127.650390625     |
| node_50: feature_name=a-HuIgG_0.03                         | feature_id[8].value > threshold=11226.33349609375   |
| node_52: feature_name=a-HuIgG_0.03                         | feature_id[8].value <= threshold=11766.0            |
| Class: healthcare workers within 60 days after vaccination |                                                     |
|                                                            |                                                     |
| Rules_216                                                  | passed counts:1                                     |
| node_0: feature_name=HuIgG_0.10                            | feature_id[1].value <= threshold=19120.166015625    |
| node_1: feature_name=SARS.CoV.2.S1.mFcTag                  | feature_id[3].value > threshold=5354.388916015625   |
| node_9: feature_name=a-HuIgG_0.30                          | feature_id[4].value <= threshold=33726.833984375    |

|                                                            |                                                     |
|------------------------------------------------------------|-----------------------------------------------------|
| node_10: feature_name=HuIgG_0.03                           | feature_id[5].value > threshold=1023.1666564941406  |
| node_20: feature_name=hCoV.HKU1.NP                         | feature_id[10].value > threshold=-20.05833387374878 |
| node_22: feature_name=SARS.CoV.S1.HisTag                   | feature_id[6].value > threshold=400.3000030517578   |
| node_26: feature_name=SARS.CoV.S1.HisTag                   | feature_id[6].value > threshold=15087.41650390625   |
| node_38: feature_name=hCoV.HKU1.NP                         | feature_id[10].value > threshold=348.6666564941406  |
| node_46: feature_name=SARS.CoV.2.S2                        | feature_id[2].value <= threshold=21127.650390625    |
| node_47: feature_name=SARS.CoV.2.Spike.RBD.rFc             | feature_id[9].value <= threshold=38684.56640625     |
| Class: healthcare workers 60–180 days after vaccination    |                                                     |
|                                                            |                                                     |
| Rules_217                                                  | passed counts:1                                     |
| node_0: feature_name=HuIgG_0.10                            | feature_id[1].value <= threshold=19120.166015625    |
| node_1: feature_name=SARS.CoV.2.S1.mFcTag                  | feature_id[3].value > threshold=5354.388916015625   |
| node_9: feature_name=a-HuIgG_0.30                          | feature_id[4].value <= threshold=33726.833984375    |
| node_10: feature_name=HuIgG_0.03                           | feature_id[5].value > threshold=1023.1666564941406  |
| node_20: feature_name=hCoV.HKU1.NP                         | feature_id[10].value > threshold=-20.05833387374878 |
| node_22: feature_name=SARS.CoV.S1.HisTag                   | feature_id[6].value > threshold=400.3000030517578   |
| node_26: feature_name=SARS.CoV.S1.HisTag                   | feature_id[6].value > threshold=15087.41650390625   |
| node_38: feature_name=hCoV.HKU1.NP                         | feature_id[10].value <= threshold=348.6666564941406 |
| node_39: feature_name=hCoV.NL63.S1_S2                      | feature_id[7].value <= threshold=26557.333984375    |
| node_40: feature_name=SARS.CoV.S1.HisTag                   | feature_id[6].value > threshold=25028.0             |
| node_42: feature_name=a-HuIgG_0.03                         | feature_id[8].value > threshold=7501.16650390625    |
| Class: healthcare workers within 60 days after vaccination |                                                     |
|                                                            |                                                     |
| Rules_218                                                  | passed counts:1                                     |
| node_0: feature_name=HuIgG_0.10                            | feature_id[1].value <= threshold=19120.166015625    |

|                                                           |                                                     |
|-----------------------------------------------------------|-----------------------------------------------------|
| node_1: feature_name=SARS.CoV.2.S1.mFcTag                 | feature_id[3].value > threshold=5354.388916015625   |
| node_9: feature_name=a-HuIgG_0.30                         | feature_id[4].value <= threshold=33726.833984375    |
| node_10: feature_name=HuIgG_0.03                          | feature_id[5].value > threshold=1023.1666564941406  |
| node_20: feature_name=hCoV.HKU1.NP                        | feature_id[10].value > threshold=-20.05833387374878 |
| node_22: feature_name=SARS.CoV.S1.HisTag                  | feature_id[6].value > threshold=400.3000030517578   |
| node_26: feature_name=SARS.CoV.S1.HisTag                  | feature_id[6].value > threshold=15087.41650390625   |
| node_38: feature_name=hCoV.HKU1.NP                        | feature_id[10].value <= threshold=348.6666564941406 |
| node_39: feature_name=hCoV.NL63.S1_S2                     | feature_id[7].value <= threshold=26557.333984375    |
| node_40: feature_name=SARS.CoV.S1.HisTag                  | feature_id[6].value > threshold=25028.0             |
| node_42: feature_name=a-HuIgG_0.03                        | feature_id[8].value <= threshold=7501.16650390625   |
| Class: healthcare workers 60–180 days after vaccination   |                                                     |
|                                                           |                                                     |
| Rules_219                                                 | passed counts:1                                     |
| node_0: feature_name=HuIgG_0.10                           | feature_id[1].value <= threshold=19120.166015625    |
| node_1: feature_name=SARS.CoV.2.S1.mFcTag                 | feature_id[3].value > threshold=5354.388916015625   |
| node_9: feature_name=a-HuIgG_0.30                         | feature_id[4].value <= threshold=33726.833984375    |
| node_10: feature_name=HuIgG_0.03                          | feature_id[5].value > threshold=1023.1666564941406  |
| node_20: feature_name=hCoV.HKU1.NP                        | feature_id[10].value > threshold=-20.05833387374878 |
| node_22: feature_name=SARS.CoV.S1.HisTag                  | feature_id[6].value > threshold=400.3000030517578   |
| node_26: feature_name=SARS.CoV.S1.HisTag                  | feature_id[6].value <= threshold=15087.41650390625  |
| node_27: feature_name=SARS.CoV.2.S1.RBD.mFc               | feature_id[0].value > threshold=43991.083984375     |
| node_35: feature_name=SARS.CoV.S1.HisTag                  | feature_id[6].value <= threshold=5744.75            |
| Class: healthcare workers over 180 days after vaccination |                                                     |
|                                                           |                                                     |
| Rules_220                                                 | passed counts:1                                     |



|                                                         |                                                     |
|---------------------------------------------------------|-----------------------------------------------------|
| node_0: feature_name=HuIgG_0.10                         | feature_id[1].value <= threshold=19120.166015625    |
| node_1: feature_name=SARS.CoV.2.S1.mFcTag               | feature_id[3].value > threshold=5354.388916015625   |
| node_9: feature_name=a-HuIgG_0.30                       | feature_id[4].value <= threshold=33726.833984375    |
| node_10: feature_name=HuIgG_0.03                        | feature_id[5].value > threshold=1023.1666564941406  |
| node_20: feature_name=hCoV.HKU1.NP                      | feature_id[10].value > threshold=-20.05833387374878 |
| node_22: feature_name=SARS.CoV.S1.HisTag                | feature_id[6].value > threshold=400.3000030517578   |
| node_26: feature_name=SARS.CoV.S1.HisTag                | feature_id[6].value <= threshold=15087.41650390625  |
| node_27: feature_name=SARS.CoV.2.S1.RBD.mFc             | feature_id[0].value <= threshold=43991.083984375    |
| node_28: feature_name=SARS.CoV.2.S1.RBD.mFc             | feature_id[0].value > threshold=33656.484375        |
| node_30: feature_name=SARS.CoV.2.S1+S2                  | feature_id[12].value <= threshold=30126.75          |
| node_31: feature_name=SARS.CoV.S1.HisTag                | feature_id[6].value <= threshold=3654.1666259765625 |
| Class: healthcare workers 60–180 days after vaccination |                                                     |
|                                                         |                                                     |
| Rules_221                                               | passed counts:1                                     |
| node_0: feature_name=HuIgG_0.10                         | feature_id[1].value <= threshold=19120.166015625    |
| node_1: feature_name=SARS.CoV.2.S1.mFcTag               | feature_id[3].value > threshold=5354.388916015625   |
| node_9: feature_name=a-HuIgG_0.30                       | feature_id[4].value <= threshold=33726.833984375    |
| node_10: feature_name=HuIgG_0.03                        | feature_id[5].value > threshold=1023.1666564941406  |
| node_20: feature_name=hCoV.HKU1.NP                      | feature_id[10].value > threshold=-20.05833387374878 |
| node_22: feature_name=SARS.CoV.S1.HisTag                | feature_id[6].value <= threshold=400.3000030517578  |
| node_23: feature_name=hCoV.NL63.S1_S2                   | feature_id[7].value <= threshold=25709.0419921875   |
| Class: healthcare workers 60–180 days after vaccination |                                                     |
|                                                         |                                                     |
| Rules_222                                               | passed counts:1                                     |
| node_0: feature_name=HuIgG_0.10                         | feature_id[1].value <= threshold=19120.166015625    |

|                                                            |                                                     |
|------------------------------------------------------------|-----------------------------------------------------|
| node_1: feature_name=SARS.CoV.2.S1.mFcTag                  | feature_id[3].value > threshold=5354.388916015625   |
| node_9: feature_name=a-HuIgG_0.30                          | feature_id[4].value <= threshold=33726.833984375    |
| node_10: feature_name=HuIgG_0.03                           | feature_id[5].value <= threshold=1023.1666564941406 |
| node_11: feature_name=SARS.CoV.2.S1.mFcTag                 | feature_id[3].value <= threshold=34194.916015625    |
| node_12: feature_name=hCoV.NL63.S1_S2                      | feature_id[7].value > threshold=23953.708984375     |
| node_14: feature_name=HuIgG_0.03                           | feature_id[5].value > threshold=786.3333435058594   |
| Class: healthcare workers over 180 days after vaccination  |                                                     |
|                                                            |                                                     |
| Rules_223                                                  | passed counts:1                                     |
| node_0: feature_name=HuIgG_0.10                            | feature_id[1].value <= threshold=19120.166015625    |
| node_1: feature_name=SARS.CoV.2.S1.mFcTag                  | feature_id[3].value > threshold=5354.388916015625   |
| node_9: feature_name=a-HuIgG_0.30                          | feature_id[4].value <= threshold=33726.833984375    |
| node_10: feature_name=HuIgG_0.03                           | feature_id[5].value <= threshold=1023.1666564941406 |
| node_11: feature_name=SARS.CoV.2.S1.mFcTag                 | feature_id[3].value <= threshold=34194.916015625    |
| node_12: feature_name=hCoV.NL63.S1_S2                      | feature_id[7].value > threshold=23953.708984375     |
| node_14: feature_name=HuIgG_0.03                           | feature_id[5].value <= threshold=786.3333435058594  |
| Class: healthcare workers 60–180 days after vaccination    |                                                     |
|                                                            |                                                     |
| Rules_224                                                  | passed counts:1                                     |
| node_0: feature_name=HuIgG_0.10                            | feature_id[1].value <= threshold=19120.166015625    |
| node_1: feature_name=SARS.CoV.2.S1.mFcTag                  | feature_id[3].value <= threshold=5354.388916015625  |
| node_2: feature_name=SARS.CoV.S1.HisTag                    | feature_id[6].value > threshold=-423.2833251953125  |
| node_4: feature_name=SARS.CoV.2.S2                         | feature_id[2].value <= threshold=566.3889007568359  |
| node_5: feature_name=SARS.CoV.2.S2                         | feature_id[2].value > threshold=462.55555725097656  |
| Class: healthcare workers within 60 days after vaccination |                                                     |

|                                                         |                                                     |
|---------------------------------------------------------|-----------------------------------------------------|
|                                                         |                                                     |
| Rules_225                                               | passed counts:1                                     |
| node_0: feature_name=HuIgG_0.10                         | feature_id[1].value <= threshold=19120.166015625    |
| node_1: feature_name=SARS.CoV.2.S1.mFcTag               | feature_id[3].value <= threshold=5354.388916015625  |
| node_2: feature_name=SARS.CoV.S1.HisTag                 | feature_id[6].value <= threshold=-423.2833251953125 |
| Class: healthcare workers 60–180 days after vaccination |                                                     |
