# Supplementary material for: Changes in Antigen-Reactive Antibody Level at Various Time Spans after COVID-19 Vaccination Using Machine Learning
Source: Preprints.org preprint supplement (doi:10.20944/preprints202304.1091.v1), 2023-04-28
Supplement: Supplementary file 2 [file supplementary]

**Table S2.** IFS results with different classification algorithms on four feature lists.

(1) IFS results on the LASSO feature list

| <b>Classification algorithms</b> | <b>Number of features</b> | <b>unvaccinated healthcare workers</b> | <b>healthcare workers within 60 days after vaccination</b> | <b>healthcare workers 60–180 days after vaccination</b> | <b>healthcare workers over 180 days after vaccination</b> | <b>ACC</b> | <b>MCC</b> | <b>Macro F1</b> | <b>Weighted F1</b> |
|----------------------------------|---------------------------|----------------------------------------|------------------------------------------------------------|---------------------------------------------------------|-----------------------------------------------------------|------------|------------|-----------------|--------------------|
| DT                               | 1                         | 0.777                                  | 0.537                                                      | 0.521                                                   | 0.328                                                     | 0.519      | 0.310      | 0.541           | 0.527              |
| DT                               | 2                         | 0.847                                  | 0.617                                                      | 0.591                                                   | 0.505                                                     | 0.610      | 0.426      | 0.640           | 0.612              |
| DT                               | 3                         | 0.797                                  | 0.578                                                      | 0.581                                                   | 0.554                                                     | 0.595      | 0.406      | 0.628           | 0.593              |
| DT                               | 4                         | 0.865                                  | 0.601                                                      | 0.595                                                   | 0.552                                                     | 0.613      | 0.430      | 0.653           | 0.613              |
| DT                               | 5                         | 0.853                                  | 0.606                                                      | 0.587                                                   | 0.644                                                     | 0.623      | 0.438      | 0.673           | 0.620              |
| DT                               | 6                         | 0.838                                  | 0.616                                                      | 0.606                                                   | 0.648                                                     | 0.635      | 0.457      | 0.677           | 0.632              |
| DT                               | 7                         | 0.830                                  | 0.600                                                      | 0.579                                                   | 0.632                                                     | 0.615      | 0.423      | 0.660           | 0.612              |
| DT                               | 8                         | 0.884                                  | 0.597                                                      | 0.601                                                   | 0.630                                                     | 0.626      | 0.440      | 0.678           | 0.624              |
| DT                               | 9                         | 0.900                                  | 0.647                                                      | 0.637                                                   | 0.646                                                     | 0.663      | 0.493      | 0.707           | 0.662              |
| DT                               | 10                        | 0.855                                  | 0.611                                                      | 0.625                                                   | 0.641                                                     | 0.640      | 0.458      | 0.683           | 0.639              |
| DT                               | 11                        | 0.844                                  | 0.634                                                      | 0.642                                                   | 0.665                                                     | 0.659      | 0.493      | 0.696           | 0.656              |
| DT                               | 12                        | 0.864                                  | 0.611                                                      | 0.631                                                   | 0.627                                                     | 0.643      | 0.468      | 0.683           | 0.641              |
| DT                               | 13                        | 0.903                                  | 0.616                                                      | 0.646                                                   | 0.655                                                     | 0.657      | 0.484      | 0.705           | 0.655              |
| DT                               | 14                        | 0.847                                  | 0.609                                                      | 0.633                                                   | 0.652                                                     | 0.645      | 0.470      | 0.685           | 0.642              |
| DT                               | 15                        | 0.895                                  | 0.636                                                      | 0.649                                                   | 0.692                                                     | 0.670      | 0.504      | 0.718           | 0.667              |
| DT                               | 16                        | 0.876                                  | 0.635                                                      | 0.648                                                   | 0.680                                                     | 0.666      | 0.499      | 0.710           | 0.664              |
| DT                               | 17                        | 0.885                                  | 0.664                                                      | 0.657                                                   | 0.700                                                     | 0.682      | 0.518      | 0.726           | 0.681              |
| DT                               | 18                        | 0.832                                  | 0.637                                                      | 0.634                                                   | 0.643                                                     | 0.653      | 0.478      | 0.687           | 0.651              |
| DT                               | 19                        | 0.899                                  | 0.657                                                      | 0.644                                                   | 0.623                                                     | 0.666      | 0.500      | 0.706           | 0.666              |

|    |    |       |       |       |       |       |       |       |       |
|----|----|-------|-------|-------|-------|-------|-------|-------|-------|
| DT | 20 | 0.909 | 0.640 | 0.641 | 0.677 | 0.666 | 0.497 | 0.717 | 0.665 |
| DT | 21 | 0.898 | 0.647 | 0.631 | 0.699 | 0.668 | 0.502 | 0.719 | 0.665 |
| DT | 22 | 0.871 | 0.664 | 0.668 | 0.646 | 0.681 | 0.526 | 0.712 | 0.680 |
| DT | 23 | 0.912 | 0.640 | 0.628 | 0.637 | 0.656 | 0.481 | 0.704 | 0.655 |
| DT | 24 | 0.867 | 0.640 | 0.638 | 0.657 | 0.660 | 0.490 | 0.700 | 0.658 |
| DT | 25 | 0.888 | 0.648 | 0.626 | 0.665 | 0.661 | 0.491 | 0.707 | 0.658 |
| DT | 26 | 0.889 | 0.668 | 0.651 | 0.728 | 0.686 | 0.529 | 0.734 | 0.684 |
| DT | 27 | 0.888 | 0.657 | 0.647 | 0.669 | 0.673 | 0.508 | 0.715 | 0.671 |
| DT | 28 | 0.906 | 0.658 | 0.656 | 0.683 | 0.680 | 0.517 | 0.726 | 0.678 |
| DT | 29 | 0.833 | 0.642 | 0.660 | 0.696 | 0.672 | 0.510 | 0.708 | 0.670 |
| DT | 30 | 0.912 | 0.628 | 0.635 | 0.649 | 0.656 | 0.481 | 0.706 | 0.655 |
| DT | 31 | 0.878 | 0.651 | 0.655 | 0.663 | 0.672 | 0.506 | 0.712 | 0.671 |
| DT | 32 | 0.874 | 0.638 | 0.656 | 0.671 | 0.669 | 0.499 | 0.710 | 0.667 |
| DT | 33 | 0.898 | 0.676 | 0.663 | 0.674 | 0.688 | 0.532 | 0.728 | 0.687 |
| DT | 34 | 0.888 | 0.661 | 0.641 | 0.644 | 0.669 | 0.500 | 0.709 | 0.668 |
| DT | 35 | 0.883 | 0.657 | 0.654 | 0.678 | 0.677 | 0.515 | 0.718 | 0.675 |
| DT | 36 | 0.886 | 0.663 | 0.672 | 0.638 | 0.682 | 0.520 | 0.715 | 0.681 |
| DT | 37 | 0.904 | 0.643 | 0.653 | 0.696 | 0.674 | 0.509 | 0.724 | 0.673 |
| DT | 38 | 0.904 | 0.662 | 0.653 | 0.633 | 0.674 | 0.508 | 0.713 | 0.673 |
| DT | 39 | 0.868 | 0.668 | 0.662 | 0.665 | 0.682 | 0.520 | 0.716 | 0.680 |
| DT | 40 | 0.887 | 0.651 | 0.651 | 0.689 | 0.674 | 0.506 | 0.720 | 0.673 |
| DT | 41 | 0.857 | 0.676 | 0.664 | 0.673 | 0.685 | 0.527 | 0.717 | 0.684 |
| DT | 42 | 0.876 | 0.653 | 0.669 | 0.700 | 0.684 | 0.524 | 0.725 | 0.682 |
| DT | 43 | 0.895 | 0.657 | 0.647 | 0.698 | 0.677 | 0.512 | 0.724 | 0.675 |
| DT | 44 | 0.878 | 0.647 | 0.636 | 0.690 | 0.666 | 0.498 | 0.713 | 0.664 |

|    |    |       |       |       |       |       |       |       |       |
|----|----|-------|-------|-------|-------|-------|-------|-------|-------|
| DT | 45 | 0.878 | 0.656 | 0.644 | 0.694 | 0.674 | 0.511 | 0.718 | 0.672 |
| DT | 46 | 0.852 | 0.658 | 0.671 | 0.720 | 0.687 | 0.528 | 0.725 | 0.685 |
| DT | 47 | 0.883 | 0.689 | 0.677 | 0.730 | 0.704 | 0.554 | 0.744 | 0.702 |
| DT | 48 | 0.862 | 0.655 | 0.655 | 0.744 | 0.682 | 0.520 | 0.729 | 0.680 |
| DT | 49 | 0.870 | 0.664 | 0.668 | 0.749 | 0.693 | 0.536 | 0.738 | 0.690 |
| DT | 50 | 0.836 | 0.681 | 0.676 | 0.745 | 0.699 | 0.545 | 0.734 | 0.697 |
| DT | 51 | 0.880 | 0.668 | 0.660 | 0.729 | 0.689 | 0.529 | 0.734 | 0.687 |
| DT | 52 | 0.884 | 0.653 | 0.642 | 0.743 | 0.679 | 0.517 | 0.731 | 0.675 |
| DT | 53 | 0.870 | 0.657 | 0.659 | 0.708 | 0.682 | 0.519 | 0.723 | 0.679 |
| DT | 54 | 0.870 | 0.669 | 0.645 | 0.708 | 0.680 | 0.518 | 0.723 | 0.678 |
| DT | 55 | 0.882 | 0.650 | 0.646 | 0.706 | 0.674 | 0.508 | 0.721 | 0.671 |
| DT | 56 | 0.861 | 0.667 | 0.665 | 0.751 | 0.692 | 0.535 | 0.736 | 0.689 |
| DT | 57 | 0.884 | 0.649 | 0.648 | 0.716 | 0.676 | 0.512 | 0.724 | 0.673 |
| DT | 58 | 0.869 | 0.671 | 0.652 | 0.756 | 0.689 | 0.529 | 0.737 | 0.686 |
| DT | 59 | 0.884 | 0.667 | 0.655 | 0.710 | 0.685 | 0.523 | 0.729 | 0.682 |
| DT | 60 | 0.884 | 0.646 | 0.656 | 0.730 | 0.680 | 0.514 | 0.729 | 0.677 |
| DT | 61 | 0.850 | 0.640 | 0.624 | 0.716 | 0.660 | 0.488 | 0.707 | 0.657 |
| DT | 62 | 0.868 | 0.646 | 0.655 | 0.738 | 0.680 | 0.518 | 0.727 | 0.676 |
| DT | 63 | 0.848 | 0.647 | 0.665 | 0.711 | 0.678 | 0.512 | 0.718 | 0.676 |
| DT | 64 | 0.843 | 0.651 | 0.647 | 0.710 | 0.672 | 0.506 | 0.713 | 0.670 |
| DT | 65 | 0.856 | 0.652 | 0.646 | 0.738 | 0.677 | 0.513 | 0.723 | 0.673 |
| DT | 66 | 0.850 | 0.655 | 0.662 | 0.707 | 0.680 | 0.518 | 0.718 | 0.678 |
| DT | 67 | 0.866 | 0.657 | 0.660 | 0.738 | 0.685 | 0.521 | 0.730 | 0.682 |
| DT | 68 | 0.852 | 0.685 | 0.664 | 0.729 | 0.696 | 0.541 | 0.733 | 0.693 |
| DT | 69 | 0.880 | 0.660 | 0.659 | 0.756 | 0.688 | 0.526 | 0.739 | 0.686 |

|     |    |       |       |       |       |       |       |       |       |
|-----|----|-------|-------|-------|-------|-------|-------|-------|-------|
| DT  | 70 | 0.866 | 0.659 | 0.673 | 0.773 | 0.696 | 0.539 | 0.743 | 0.692 |
| DT  | 71 | 0.866 | 0.664 | 0.674 | 0.714 | 0.690 | 0.532 | 0.730 | 0.689 |
| DT  | 72 | 0.861 | 0.636 | 0.653 | 0.730 | 0.673 | 0.507 | 0.720 | 0.670 |
| DT  | 73 | 0.880 | 0.656 | 0.663 | 0.727 | 0.685 | 0.522 | 0.731 | 0.683 |
| KNN | 1  | 0.792 | 0.536 | 0.527 | 0.337 | 0.522 | 0.316 | 0.548 | 0.531 |
| KNN | 2  | 0.843 | 0.649 | 0.602 | 0.596 | 0.640 | 0.472 | 0.673 | 0.638 |
| KNN | 3  | 0.822 | 0.620 | 0.613 | 0.677 | 0.642 | 0.476 | 0.683 | 0.638 |
| KNN | 4  | 0.874 | 0.613 | 0.626 | 0.719 | 0.654 | 0.486 | 0.708 | 0.649 |
| KNN | 5  | 0.895 | 0.624 | 0.607 | 0.734 | 0.654 | 0.486 | 0.715 | 0.648 |
| KNN | 6  | 0.880 | 0.624 | 0.613 | 0.764 | 0.659 | 0.493 | 0.720 | 0.653 |
| KNN | 7  | 0.893 | 0.652 | 0.637 | 0.779 | 0.682 | 0.528 | 0.740 | 0.677 |
| KNN | 8  | 0.872 | 0.615 | 0.618 | 0.772 | 0.658 | 0.492 | 0.719 | 0.652 |
| KNN | 9  | 0.892 | 0.612 | 0.617 | 0.735 | 0.654 | 0.487 | 0.714 | 0.648 |
| KNN | 10 | 0.877 | 0.599 | 0.611 | 0.743 | 0.647 | 0.477 | 0.707 | 0.640 |
| KNN | 11 | 0.896 | 0.608 | 0.601 | 0.755 | 0.648 | 0.476 | 0.715 | 0.642 |
| KNN | 12 | 0.908 | 0.642 | 0.620 | 0.739 | 0.669 | 0.511 | 0.727 | 0.663 |
| KNN | 13 | 0.912 | 0.654 | 0.639 | 0.749 | 0.682 | 0.528 | 0.738 | 0.677 |
| KNN | 14 | 0.904 | 0.665 | 0.639 | 0.755 | 0.687 | 0.537 | 0.741 | 0.681 |
| KNN | 15 | 0.924 | 0.665 | 0.650 | 0.749 | 0.691 | 0.541 | 0.747 | 0.687 |
| KNN | 16 | 0.912 | 0.650 | 0.632 | 0.779 | 0.681 | 0.524 | 0.743 | 0.675 |
| KNN | 17 | 0.929 | 0.660 | 0.640 | 0.786 | 0.690 | 0.536 | 0.754 | 0.685 |
| KNN | 18 | 0.908 | 0.686 | 0.651 | 0.812 | 0.706 | 0.563 | 0.764 | 0.701 |
| KNN | 19 | 0.904 | 0.671 | 0.657 | 0.811 | 0.702 | 0.554 | 0.761 | 0.697 |
| KNN | 20 | 0.900 | 0.681 | 0.655 | 0.781 | 0.701 | 0.554 | 0.754 | 0.697 |
| KNN | 21 | 0.904 | 0.680 | 0.646 | 0.787 | 0.699 | 0.553 | 0.755 | 0.693 |

|     |    |       |       |       |       |       |       |       |       |
|-----|----|-------|-------|-------|-------|-------|-------|-------|-------|
| KNN | 22 | 0.912 | 0.667 | 0.634 | 0.771 | 0.688 | 0.535 | 0.746 | 0.682 |
| KNN | 23 | 0.924 | 0.645 | 0.625 | 0.764 | 0.675 | 0.516 | 0.740 | 0.670 |
| KNN | 24 | 0.924 | 0.639 | 0.622 | 0.745 | 0.669 | 0.509 | 0.732 | 0.664 |
| KNN | 25 | 0.920 | 0.646 | 0.633 | 0.776 | 0.680 | 0.523 | 0.744 | 0.675 |
| KNN | 26 | 0.924 | 0.624 | 0.619 | 0.776 | 0.666 | 0.503 | 0.736 | 0.660 |
| KNN | 27 | 0.929 | 0.643 | 0.620 | 0.778 | 0.674 | 0.514 | 0.742 | 0.669 |
| KNN | 28 | 0.937 | 0.654 | 0.627 | 0.791 | 0.683 | 0.525 | 0.752 | 0.678 |
| KNN | 29 | 0.941 | 0.646 | 0.619 | 0.787 | 0.677 | 0.516 | 0.748 | 0.671 |
| KNN | 30 | 0.920 | 0.649 | 0.621 | 0.784 | 0.677 | 0.519 | 0.743 | 0.671 |
| KNN | 31 | 0.912 | 0.650 | 0.631 | 0.786 | 0.681 | 0.524 | 0.745 | 0.675 |
| KNN | 32 | 0.924 | 0.672 | 0.646 | 0.805 | 0.699 | 0.552 | 0.762 | 0.694 |
| KNN | 33 | 0.945 | 0.671 | 0.639 | 0.782 | 0.694 | 0.543 | 0.759 | 0.689 |
| KNN | 34 | 0.937 | 0.670 | 0.639 | 0.779 | 0.693 | 0.540 | 0.756 | 0.688 |
| KNN | 35 | 0.924 | 0.670 | 0.638 | 0.784 | 0.693 | 0.543 | 0.754 | 0.687 |
| KNN | 36 | 0.933 | 0.665 | 0.642 | 0.784 | 0.693 | 0.541 | 0.756 | 0.688 |
| KNN | 37 | 0.924 | 0.672 | 0.645 | 0.772 | 0.695 | 0.546 | 0.754 | 0.690 |
| KNN | 38 | 0.924 | 0.668 | 0.636 | 0.774 | 0.690 | 0.538 | 0.750 | 0.684 |
| KNN | 39 | 0.933 | 0.678 | 0.649 | 0.779 | 0.700 | 0.552 | 0.760 | 0.695 |
| KNN | 40 | 0.937 | 0.673 | 0.636 | 0.778 | 0.693 | 0.544 | 0.756 | 0.688 |
| KNN | 41 | 0.933 | 0.655 | 0.630 | 0.778 | 0.683 | 0.527 | 0.749 | 0.678 |
| KNN | 42 | 0.929 | 0.669 | 0.637 | 0.758 | 0.689 | 0.538 | 0.748 | 0.684 |
| KNN | 43 | 0.928 | 0.662 | 0.636 | 0.768 | 0.687 | 0.532 | 0.749 | 0.682 |
| KNN | 44 | 0.933 | 0.673 | 0.646 | 0.773 | 0.696 | 0.549 | 0.756 | 0.691 |
| KNN | 45 | 0.916 | 0.660 | 0.644 | 0.781 | 0.690 | 0.539 | 0.750 | 0.685 |
| KNN | 46 | 0.924 | 0.655 | 0.631 | 0.771 | 0.682 | 0.526 | 0.746 | 0.677 |

|     |    |       |       |       |       |       |       |       |       |
|-----|----|-------|-------|-------|-------|-------|-------|-------|-------|
| KNN | 47 | 0.916 | 0.676 | 0.648 | 0.775 | 0.698 | 0.552 | 0.754 | 0.692 |
| KNN | 48 | 0.933 | 0.665 | 0.643 | 0.793 | 0.694 | 0.544 | 0.758 | 0.689 |
| KNN | 49 | 0.950 | 0.676 | 0.644 | 0.788 | 0.699 | 0.551 | 0.764 | 0.694 |
| KNN | 50 | 0.933 | 0.669 | 0.653 | 0.807 | 0.701 | 0.553 | 0.766 | 0.696 |
| KNN | 51 | 0.929 | 0.672 | 0.652 | 0.770 | 0.697 | 0.548 | 0.755 | 0.692 |
| KNN | 52 | 0.945 | 0.687 | 0.647 | 0.787 | 0.705 | 0.562 | 0.767 | 0.700 |
| KNN | 53 | 0.941 | 0.664 | 0.641 | 0.776 | 0.691 | 0.539 | 0.755 | 0.686 |
| KNN | 54 | 0.908 | 0.679 | 0.652 | 0.775 | 0.700 | 0.555 | 0.754 | 0.695 |
| KNN | 55 | 0.941 | 0.677 | 0.642 | 0.770 | 0.696 | 0.547 | 0.758 | 0.692 |
| KNN | 56 | 0.937 | 0.660 | 0.636 | 0.770 | 0.687 | 0.532 | 0.751 | 0.682 |
| KNN | 57 | 0.920 | 0.680 | 0.653 | 0.792 | 0.703 | 0.557 | 0.761 | 0.698 |
| KNN | 58 | 0.929 | 0.693 | 0.655 | 0.777 | 0.709 | 0.569 | 0.764 | 0.703 |
| KNN | 59 | 0.920 | 0.667 | 0.649 | 0.779 | 0.695 | 0.545 | 0.754 | 0.690 |
| KNN | 60 | 0.932 | 0.668 | 0.646 | 0.780 | 0.694 | 0.541 | 0.756 | 0.690 |
| KNN | 61 | 0.920 | 0.654 | 0.640 | 0.777 | 0.686 | 0.532 | 0.748 | 0.681 |
| KNN | 62 | 0.937 | 0.654 | 0.636 | 0.763 | 0.684 | 0.529 | 0.748 | 0.679 |
| KNN | 63 | 0.933 | 0.673 | 0.637 | 0.767 | 0.692 | 0.542 | 0.752 | 0.687 |
| KNN | 64 | 0.916 | 0.677 | 0.647 | 0.767 | 0.697 | 0.552 | 0.752 | 0.692 |
| KNN | 65 | 0.924 | 0.673 | 0.649 | 0.782 | 0.698 | 0.550 | 0.757 | 0.693 |
| KNN | 66 | 0.916 | 0.681 | 0.654 | 0.779 | 0.702 | 0.556 | 0.758 | 0.697 |
| KNN | 67 | 0.936 | 0.666 | 0.642 | 0.786 | 0.693 | 0.542 | 0.758 | 0.689 |
| KNN | 68 | 0.924 | 0.678 | 0.661 | 0.787 | 0.705 | 0.560 | 0.763 | 0.700 |
| KNN | 69 | 0.908 | 0.675 | 0.650 | 0.773 | 0.697 | 0.551 | 0.751 | 0.692 |
| KNN | 70 | 0.920 | 0.690 | 0.661 | 0.780 | 0.709 | 0.565 | 0.763 | 0.704 |
| KNN | 71 | 0.920 | 0.687 | 0.665 | 0.806 | 0.712 | 0.569 | 0.770 | 0.708 |

|     |    |       |       |       |       |       |       |       |       |
|-----|----|-------|-------|-------|-------|-------|-------|-------|-------|
| KNN | 72 | 0.937 | 0.676 | 0.657 | 0.811 | 0.706 | 0.558 | 0.770 | 0.701 |
| KNN | 73 | 0.933 | 0.690 | 0.668 | 0.812 | 0.716 | 0.574 | 0.776 | 0.711 |
| RF  | 1  | 0.762 | 0.540 | 0.511 | 0.341 | 0.518 | 0.308 | 0.539 | 0.524 |
| RF  | 2  | 0.845 | 0.639 | 0.590 | 0.588 | 0.631 | 0.457 | 0.665 | 0.628 |
| RF  | 3  | 0.845 | 0.657 | 0.610 | 0.618 | 0.650 | 0.486 | 0.682 | 0.647 |
| RF  | 4  | 0.887 | 0.651 | 0.614 | 0.699 | 0.663 | 0.502 | 0.713 | 0.658 |
| RF  | 5  | 0.898 | 0.672 | 0.618 | 0.698 | 0.674 | 0.522 | 0.721 | 0.668 |
| RF  | 6  | 0.891 | 0.673 | 0.606 | 0.724 | 0.673 | 0.520 | 0.724 | 0.666 |
| RF  | 7  | 0.899 | 0.678 | 0.606 | 0.713 | 0.674 | 0.524 | 0.724 | 0.667 |
| RF  | 8  | 0.888 | 0.695 | 0.617 | 0.736 | 0.688 | 0.547 | 0.734 | 0.680 |
| RF  | 9  | 0.893 | 0.681 | 0.622 | 0.734 | 0.684 | 0.538 | 0.732 | 0.677 |
| RF  | 10 | 0.893 | 0.698 | 0.653 | 0.755 | 0.705 | 0.569 | 0.750 | 0.699 |
| RF  | 11 | 0.897 | 0.695 | 0.626 | 0.736 | 0.692 | 0.550 | 0.738 | 0.685 |
| RF  | 12 | 0.897 | 0.695 | 0.624 | 0.734 | 0.691 | 0.551 | 0.737 | 0.684 |
| RF  | 13 | 0.889 | 0.691 | 0.615 | 0.725 | 0.685 | 0.543 | 0.730 | 0.676 |
| RF  | 14 | 0.889 | 0.698 | 0.614 | 0.741 | 0.689 | 0.547 | 0.735 | 0.680 |
| RF  | 15 | 0.908 | 0.713 | 0.630 | 0.727 | 0.701 | 0.568 | 0.745 | 0.694 |
| RF  | 16 | 0.897 | 0.714 | 0.633 | 0.764 | 0.706 | 0.571 | 0.752 | 0.698 |
| RF  | 17 | 0.900 | 0.708 | 0.631 | 0.769 | 0.704 | 0.566 | 0.752 | 0.696 |
| RF  | 18 | 0.904 | 0.725 | 0.659 | 0.788 | 0.723 | 0.594 | 0.769 | 0.717 |
| RF  | 19 | 0.920 | 0.735 | 0.663 | 0.781 | 0.729 | 0.604 | 0.775 | 0.722 |
| RF  | 20 | 0.924 | 0.735 | 0.661 | 0.785 | 0.729 | 0.602 | 0.776 | 0.723 |
| RF  | 21 | 0.924 | 0.749 | 0.674 | 0.800 | 0.741 | 0.622 | 0.787 | 0.735 |
| RF  | 22 | 0.920 | 0.729 | 0.661 | 0.811 | 0.729 | 0.601 | 0.780 | 0.722 |
| RF  | 23 | 0.916 | 0.741 | 0.667 | 0.810 | 0.736 | 0.614 | 0.783 | 0.729 |

|    |    |       |       |       |       |       |       |       |       |
|----|----|-------|-------|-------|-------|-------|-------|-------|-------|
| RF | 24 | 0.916 | 0.737 | 0.657 | 0.808 | 0.731 | 0.608 | 0.780 | 0.723 |
| RF | 25 | 0.908 | 0.732 | 0.655 | 0.811 | 0.728 | 0.600 | 0.777 | 0.720 |
| RF | 26 | 0.912 | 0.716 | 0.642 | 0.817 | 0.717 | 0.584 | 0.772 | 0.709 |
| RF | 27 | 0.916 | 0.724 | 0.644 | 0.800 | 0.720 | 0.589 | 0.771 | 0.712 |
| RF | 28 | 0.916 | 0.733 | 0.663 | 0.809 | 0.731 | 0.605 | 0.780 | 0.724 |
| RF | 29 | 0.920 | 0.729 | 0.660 | 0.816 | 0.730 | 0.603 | 0.781 | 0.723 |
| RF | 30 | 0.916 | 0.733 | 0.656 | 0.804 | 0.728 | 0.604 | 0.777 | 0.721 |
| RF | 31 | 0.912 | 0.740 | 0.660 | 0.808 | 0.733 | 0.612 | 0.780 | 0.725 |
| RF | 32 | 0.916 | 0.740 | 0.644 | 0.808 | 0.728 | 0.607 | 0.777 | 0.719 |
| RF | 33 | 0.908 | 0.741 | 0.651 | 0.804 | 0.730 | 0.607 | 0.776 | 0.721 |
| RF | 34 | 0.912 | 0.734 | 0.649 | 0.807 | 0.727 | 0.604 | 0.776 | 0.718 |
| RF | 35 | 0.912 | 0.744 | 0.655 | 0.815 | 0.734 | 0.615 | 0.781 | 0.725 |
| RF | 36 | 0.916 | 0.725 | 0.637 | 0.815 | 0.720 | 0.595 | 0.774 | 0.711 |
| RF | 37 | 0.916 | 0.734 | 0.651 | 0.815 | 0.728 | 0.604 | 0.779 | 0.720 |
| RF | 38 | 0.912 | 0.740 | 0.657 | 0.821 | 0.734 | 0.615 | 0.783 | 0.726 |
| RF | 39 | 0.912 | 0.740 | 0.650 | 0.818 | 0.731 | 0.610 | 0.780 | 0.722 |
| RF | 40 | 0.916 | 0.737 | 0.641 | 0.823 | 0.728 | 0.606 | 0.779 | 0.718 |
| RF | 41 | 0.920 | 0.729 | 0.640 | 0.832 | 0.725 | 0.601 | 0.780 | 0.715 |
| RF | 42 | 0.924 | 0.756 | 0.658 | 0.823 | 0.743 | 0.631 | 0.790 | 0.733 |
| RF | 43 | 0.920 | 0.733 | 0.631 | 0.816 | 0.722 | 0.599 | 0.775 | 0.711 |
| RF | 44 | 0.924 | 0.734 | 0.627 | 0.809 | 0.721 | 0.599 | 0.774 | 0.710 |
| RF | 45 | 0.912 | 0.737 | 0.622 | 0.829 | 0.723 | 0.604 | 0.775 | 0.710 |
| RF | 46 | 0.920 | 0.749 | 0.641 | 0.833 | 0.736 | 0.624 | 0.786 | 0.724 |
| RF | 47 | 0.908 | 0.732 | 0.627 | 0.833 | 0.722 | 0.600 | 0.775 | 0.710 |
| RF | 48 | 0.912 | 0.743 | 0.634 | 0.833 | 0.730 | 0.614 | 0.781 | 0.718 |



|    |    |       |       |       |       |       |       |       |       |
|----|----|-------|-------|-------|-------|-------|-------|-------|-------|
| RF | 49 | 0.912 | 0.750 | 0.644 | 0.829 | 0.736 | 0.621 | 0.784 | 0.725 |
| RF | 50 | 0.920 | 0.744 | 0.648 | 0.843 | 0.736 | 0.619 | 0.789 | 0.726 |
| RF | 51 | 0.916 | 0.744 | 0.635 | 0.838 | 0.731 | 0.615 | 0.783 | 0.720 |
| RF | 52 | 0.908 | 0.748 | 0.637 | 0.831 | 0.732 | 0.616 | 0.781 | 0.721 |
| RF | 53 | 0.907 | 0.736 | 0.627 | 0.836 | 0.723 | 0.602 | 0.776 | 0.712 |
| RF | 54 | 0.908 | 0.736 | 0.616 | 0.825 | 0.720 | 0.601 | 0.771 | 0.706 |
| RF | 55 | 0.912 | 0.740 | 0.622 | 0.831 | 0.724 | 0.606 | 0.776 | 0.711 |
| RF | 56 | 0.912 | 0.731 | 0.626 | 0.833 | 0.721 | 0.598 | 0.776 | 0.710 |
| RF | 57 | 0.920 | 0.737 | 0.619 | 0.832 | 0.723 | 0.605 | 0.777 | 0.710 |
| RF | 58 | 0.912 | 0.735 | 0.621 | 0.838 | 0.723 | 0.604 | 0.777 | 0.710 |
| RF | 59 | 0.912 | 0.736 | 0.634 | 0.828 | 0.725 | 0.606 | 0.778 | 0.715 |
| RF | 60 | 0.900 | 0.736 | 0.629 | 0.839 | 0.725 | 0.607 | 0.776 | 0.713 |
| RF | 61 | 0.916 | 0.735 | 0.633 | 0.840 | 0.726 | 0.605 | 0.781 | 0.715 |
| RF | 62 | 0.900 | 0.735 | 0.624 | 0.833 | 0.722 | 0.601 | 0.773 | 0.710 |
| RF | 63 | 0.904 | 0.736 | 0.612 | 0.838 | 0.720 | 0.602 | 0.773 | 0.706 |
| RF | 64 | 0.900 | 0.745 | 0.634 | 0.827 | 0.729 | 0.614 | 0.777 | 0.717 |
| RF | 65 | 0.908 | 0.745 | 0.623 | 0.819 | 0.725 | 0.612 | 0.774 | 0.712 |
| RF | 66 | 0.920 | 0.748 | 0.639 | 0.832 | 0.734 | 0.621 | 0.785 | 0.723 |
| RF | 67 | 0.912 | 0.746 | 0.631 | 0.829 | 0.730 | 0.616 | 0.780 | 0.717 |
| RF | 68 | 0.912 | 0.738 | 0.631 | 0.835 | 0.726 | 0.607 | 0.779 | 0.715 |
| RF | 69 | 0.920 | 0.745 | 0.633 | 0.827 | 0.730 | 0.614 | 0.781 | 0.718 |
| RF | 70 | 0.912 | 0.745 | 0.640 | 0.828 | 0.732 | 0.617 | 0.781 | 0.721 |
| RF | 71 | 0.920 | 0.739 | 0.631 | 0.833 | 0.727 | 0.607 | 0.781 | 0.716 |
| RF | 72 | 0.920 | 0.749 | 0.650 | 0.848 | 0.740 | 0.627 | 0.792 | 0.730 |
| RF | 73 | 0.908 | 0.749 | 0.645 | 0.840 | 0.736 | 0.622 | 0.786 | 0.725 |

|     |    |       |       |       |       |       |       |       |       |
|-----|----|-------|-------|-------|-------|-------|-------|-------|-------|
| SVM | 1  | 0.872 | 0.676 | 0.517 | 0.326 | 0.588 | 0.405 | 0.598 | 0.586 |
| SVM | 2  | 0.879 | 0.682 | 0.550 | 0.530 | 0.634 | 0.477 | 0.660 | 0.625 |
| SVM | 3  | 0.826 | 0.682 | 0.533 | 0.526 | 0.625 | 0.468 | 0.642 | 0.612 |
| SVM | 4  | 0.832 | 0.678 | 0.533 | 0.553 | 0.628 | 0.473 | 0.649 | 0.614 |
| SVM | 5  | 0.855 | 0.672 | 0.562 | 0.615 | 0.642 | 0.489 | 0.676 | 0.632 |
| SVM | 6  | 0.836 | 0.680 | 0.554 | 0.649 | 0.647 | 0.492 | 0.680 | 0.634 |
| SVM | 7  | 0.826 | 0.694 | 0.574 | 0.651 | 0.659 | 0.512 | 0.686 | 0.648 |
| SVM | 8  | 0.855 | 0.689 | 0.593 | 0.686 | 0.669 | 0.519 | 0.706 | 0.659 |
| SVM | 9  | 0.852 | 0.663 | 0.600 | 0.715 | 0.663 | 0.505 | 0.707 | 0.655 |
| SVM | 10 | 0.860 | 0.671 | 0.620 | 0.712 | 0.674 | 0.519 | 0.716 | 0.668 |
| SVM | 11 | 0.870 | 0.659 | 0.632 | 0.738 | 0.677 | 0.520 | 0.725 | 0.672 |
| SVM | 12 | 0.860 | 0.655 | 0.610 | 0.715 | 0.663 | 0.500 | 0.710 | 0.657 |
| SVM | 13 | 0.870 | 0.654 | 0.616 | 0.745 | 0.669 | 0.505 | 0.721 | 0.663 |
| SVM | 14 | 0.860 | 0.669 | 0.623 | 0.749 | 0.677 | 0.521 | 0.725 | 0.672 |
| SVM | 15 | 0.860 | 0.669 | 0.645 | 0.765 | 0.688 | 0.534 | 0.734 | 0.683 |
| SVM | 16 | 0.867 | 0.667 | 0.650 | 0.811 | 0.695 | 0.542 | 0.749 | 0.690 |
| SVM | 17 | 0.878 | 0.685 | 0.660 | 0.806 | 0.706 | 0.558 | 0.757 | 0.701 |
| SVM | 18 | 0.870 | 0.680 | 0.655 | 0.806 | 0.701 | 0.553 | 0.753 | 0.696 |
| SVM | 19 | 0.893 | 0.680 | 0.660 | 0.821 | 0.706 | 0.559 | 0.763 | 0.702 |
| SVM | 20 | 0.893 | 0.696 | 0.680 | 0.830 | 0.722 | 0.580 | 0.775 | 0.718 |
| SVM | 21 | 0.889 | 0.686 | 0.670 | 0.820 | 0.712 | 0.566 | 0.766 | 0.708 |
| SVM | 22 | 0.881 | 0.672 | 0.662 | 0.806 | 0.701 | 0.550 | 0.755 | 0.697 |
| SVM | 23 | 0.924 | 0.680 | 0.667 | 0.820 | 0.711 | 0.562 | 0.773 | 0.707 |
| SVM | 24 | 0.924 | 0.667 | 0.655 | 0.820 | 0.701 | 0.546 | 0.767 | 0.697 |
| SVM | 25 | 0.908 | 0.654 | 0.636 | 0.807 | 0.686 | 0.526 | 0.752 | 0.682 |

|     |    |       |       |       |       |       |       |       |       |
|-----|----|-------|-------|-------|-------|-------|-------|-------|-------|
| SVM | 26 | 0.920 | 0.664 | 0.651 | 0.816 | 0.698 | 0.543 | 0.763 | 0.694 |
| SVM | 27 | 0.916 | 0.673 | 0.661 | 0.815 | 0.705 | 0.554 | 0.767 | 0.701 |
| SVM | 28 | 0.920 | 0.678 | 0.647 | 0.784 | 0.698 | 0.547 | 0.758 | 0.694 |
| SVM | 29 | 0.920 | 0.670 | 0.636 | 0.796 | 0.692 | 0.537 | 0.756 | 0.687 |
| SVM | 30 | 0.924 | 0.673 | 0.643 | 0.796 | 0.696 | 0.543 | 0.759 | 0.692 |
| SVM | 31 | 0.920 | 0.679 | 0.655 | 0.810 | 0.704 | 0.554 | 0.766 | 0.700 |
| SVM | 32 | 0.912 | 0.686 | 0.664 | 0.815 | 0.711 | 0.563 | 0.769 | 0.707 |
| SVM | 33 | 0.920 | 0.678 | 0.655 | 0.826 | 0.706 | 0.555 | 0.770 | 0.702 |
| SVM | 34 | 0.924 | 0.680 | 0.658 | 0.829 | 0.708 | 0.558 | 0.773 | 0.704 |
| SVM | 35 | 0.924 | 0.679 | 0.657 | 0.832 | 0.708 | 0.558 | 0.773 | 0.704 |
| SVM | 36 | 0.916 | 0.675 | 0.654 | 0.832 | 0.704 | 0.553 | 0.769 | 0.700 |
| SVM | 37 | 0.916 | 0.676 | 0.653 | 0.832 | 0.704 | 0.553 | 0.769 | 0.700 |
| SVM | 38 | 0.916 | 0.676 | 0.651 | 0.829 | 0.704 | 0.552 | 0.768 | 0.699 |
| SVM | 39 | 0.920 | 0.683 | 0.667 | 0.838 | 0.714 | 0.567 | 0.777 | 0.710 |
| SVM | 40 | 0.912 | 0.681 | 0.664 | 0.834 | 0.711 | 0.562 | 0.773 | 0.707 |
| SVM | 41 | 0.912 | 0.681 | 0.666 | 0.838 | 0.712 | 0.565 | 0.774 | 0.708 |
| SVM | 42 | 0.908 | 0.683 | 0.668 | 0.838 | 0.714 | 0.567 | 0.775 | 0.710 |
| SVM | 43 | 0.916 | 0.686 | 0.668 | 0.835 | 0.715 | 0.569 | 0.777 | 0.711 |
| SVM | 44 | 0.916 | 0.687 | 0.671 | 0.835 | 0.717 | 0.571 | 0.778 | 0.713 |
| SVM | 45 | 0.920 | 0.691 | 0.669 | 0.834 | 0.717 | 0.573 | 0.778 | 0.713 |
| SVM | 46 | 0.920 | 0.690 | 0.670 | 0.834 | 0.717 | 0.573 | 0.779 | 0.713 |
| SVM | 47 | 0.916 | 0.702 | 0.679 | 0.826 | 0.725 | 0.585 | 0.781 | 0.721 |
| SVM | 48 | 0.916 | 0.701 | 0.673 | 0.824 | 0.722 | 0.581 | 0.778 | 0.718 |
| SVM | 49 | 0.916 | 0.698 | 0.673 | 0.825 | 0.721 | 0.580 | 0.778 | 0.717 |
| SVM | 50 | 0.916 | 0.699 | 0.675 | 0.822 | 0.722 | 0.581 | 0.778 | 0.718 |

|     |    |       |       |       |       |       |       |       |       |
|-----|----|-------|-------|-------|-------|-------|-------|-------|-------|
| SVM | 51 | 0.916 | 0.701 | 0.676 | 0.829 | 0.723 | 0.582 | 0.780 | 0.719 |
| SVM | 52 | 0.912 | 0.706 | 0.687 | 0.832 | 0.730 | 0.591 | 0.784 | 0.726 |
| SVM | 53 | 0.912 | 0.709 | 0.685 | 0.821 | 0.729 | 0.591 | 0.782 | 0.725 |
| SVM | 54 | 0.912 | 0.709 | 0.685 | 0.821 | 0.729 | 0.591 | 0.782 | 0.725 |
| SVM | 55 | 0.916 | 0.711 | 0.683 | 0.825 | 0.730 | 0.592 | 0.784 | 0.726 |
| SVM | 56 | 0.916 | 0.714 | 0.685 | 0.821 | 0.731 | 0.595 | 0.784 | 0.728 |
| SVM | 57 | 0.904 | 0.710 | 0.689 | 0.830 | 0.732 | 0.596 | 0.784 | 0.728 |
| SVM | 58 | 0.908 | 0.712 | 0.689 | 0.830 | 0.733 | 0.597 | 0.785 | 0.729 |
| SVM | 59 | 0.912 | 0.703 | 0.676 | 0.821 | 0.723 | 0.582 | 0.778 | 0.719 |
| SVM | 60 | 0.908 | 0.699 | 0.678 | 0.816 | 0.722 | 0.580 | 0.775 | 0.718 |
| SVM | 61 | 0.908 | 0.698 | 0.680 | 0.838 | 0.724 | 0.583 | 0.781 | 0.720 |
| SVM | 62 | 0.908 | 0.706 | 0.682 | 0.832 | 0.728 | 0.589 | 0.782 | 0.724 |
| SVM | 63 | 0.908 | 0.696 | 0.675 | 0.834 | 0.721 | 0.578 | 0.778 | 0.717 |
| SVM | 64 | 0.912 | 0.701 | 0.673 | 0.826 | 0.722 | 0.580 | 0.778 | 0.718 |
| SVM | 65 | 0.912 | 0.702 | 0.676 | 0.826 | 0.723 | 0.582 | 0.779 | 0.719 |
| SVM | 66 | 0.920 | 0.705 | 0.680 | 0.843 | 0.728 | 0.590 | 0.787 | 0.724 |
| SVM | 67 | 0.916 | 0.692 | 0.672 | 0.846 | 0.720 | 0.578 | 0.782 | 0.716 |
| SVM | 68 | 0.908 | 0.701 | 0.689 | 0.850 | 0.731 | 0.593 | 0.787 | 0.727 |
| SVM | 69 | 0.912 | 0.705 | 0.694 | 0.849 | 0.734 | 0.598 | 0.790 | 0.731 |
| SVM | 70 | 0.912 | 0.703 | 0.687 | 0.847 | 0.731 | 0.594 | 0.787 | 0.727 |
| SVM | 71 | 0.920 | 0.705 | 0.689 | 0.847 | 0.733 | 0.596 | 0.790 | 0.729 |
| SVM | 72 | 0.929 | 0.703 | 0.692 | 0.860 | 0.735 | 0.599 | 0.796 | 0.731 |
| SVM | 73 | 0.924 | 0.707 | 0.694 | 0.859 | 0.737 | 0.603 | 0.796 | 0.733 |

(2) IFS results on the LightGBM feature list

| <b>Classification algorithms</b> | <b>Number of features</b> | <b>unvaccinated healthcare workers</b> | <b>healthcare workers within 60 days after vaccination</b> | <b>healthcare workers 60–180 days after vaccination</b> | <b>healthcare workers over 180 days after vaccination</b> | <b>ACC</b> | <b>MCC</b> | <b>Macro F1</b> | <b>Weighted F1</b> |
|----------------------------------|---------------------------|----------------------------------------|------------------------------------------------------------|---------------------------------------------------------|-----------------------------------------------------------|------------|------------|-----------------|--------------------|
| DT                               | 1                         | 0.364                                  | 0.542                                                      | 0.392                                                   | 0.397                                                     | 0.444      | 0.225      | 0.424           | 0.449              |
| DT                               | 2                         | 0.852                                  | 0.593                                                      | 0.564                                                   | 0.493                                                     | 0.588      | 0.395      | 0.625           | 0.590              |
| DT                               | 3                         | 0.858                                  | 0.583                                                      | 0.581                                                   | 0.501                                                     | 0.594      | 0.400      | 0.631           | 0.595              |
| DT                               | 4                         | 0.833                                  | 0.637                                                      | 0.626                                                   | 0.670                                                     | 0.653      | 0.482      | 0.691           | 0.650              |
| DT                               | 5                         | 0.884                                  | 0.650                                                      | 0.643                                                   | 0.689                                                     | 0.671      | 0.503      | 0.716           | 0.669              |
| DT                               | 6                         | 0.851                                  | 0.670                                                      | 0.663                                                   | 0.722                                                     | 0.688      | 0.530      | 0.726           | 0.686              |
| DT                               | 7                         | 0.876                                  | 0.663                                                      | 0.674                                                   | 0.766                                                     | 0.697      | 0.541      | 0.745           | 0.694              |
| DT                               | 8                         | 0.848                                  | 0.665                                                      | 0.658                                                   | 0.705                                                     | 0.682      | 0.522      | 0.719           | 0.680              |
| DT                               | 9                         | 0.885                                  | 0.679                                                      | 0.660                                                   | 0.717                                                     | 0.693      | 0.537      | 0.735           | 0.690              |
| DT                               | 10                        | 0.881                                  | 0.667                                                      | 0.672                                                   | 0.767                                                     | 0.698      | 0.539      | 0.747           | 0.696              |
| DT                               | 11                        | 0.850                                  | 0.655                                                      | 0.650                                                   | 0.738                                                     | 0.679      | 0.515      | 0.723           | 0.676              |
| DT                               | 12                        | 0.909                                  | 0.671                                                      | 0.667                                                   | 0.708                                                     | 0.693      | 0.534      | 0.739           | 0.691              |
| DT                               | 13                        | 0.853                                  | 0.687                                                      | 0.696                                                   | 0.779                                                     | 0.715      | 0.568      | 0.754           | 0.713              |
| DT                               | 14                        | 0.869                                  | 0.691                                                      | 0.685                                                   | 0.770                                                     | 0.712      | 0.564      | 0.754           | 0.710              |
| DT                               | 15                        | 0.876                                  | 0.690                                                      | 0.674                                                   | 0.749                                                     | 0.705      | 0.553      | 0.747           | 0.703              |
| DT                               | 16                        | 0.877                                  | 0.653                                                      | 0.654                                                   | 0.766                                                     | 0.685      | 0.521      | 0.738           | 0.682              |
| DT                               | 17                        | 0.867                                  | 0.670                                                      | 0.663                                                   | 0.751                                                     | 0.693      | 0.535      | 0.738           | 0.690              |
| DT                               | 18                        | 0.874                                  | 0.657                                                      | 0.661                                                   | 0.748                                                     | 0.687      | 0.525      | 0.735           | 0.684              |
| DT                               | 19                        | 0.852                                  | 0.689                                                      | 0.693                                                   | 0.752                                                     | 0.712      | 0.565      | 0.746           | 0.710              |
| DT                               | 20                        | 0.852                                  | 0.677                                                      | 0.686                                                   | 0.768                                                     | 0.706      | 0.554      | 0.746           | 0.704              |
| DT                               | 21                        | 0.847                                  | 0.671                                                      | 0.682                                                   | 0.743                                                     | 0.699      | 0.545      | 0.736           | 0.697              |
| DT                               | 22                        | 0.878                                  | 0.670                                                      | 0.657                                                   | 0.738                                                     | 0.690      | 0.531      | 0.736           | 0.687              |

|    |    |       |       |       |       |       |       |       |       |
|----|----|-------|-------|-------|-------|-------|-------|-------|-------|
| DT | 23 | 0.862 | 0.679 | 0.671 | 0.733 | 0.697 | 0.543 | 0.736 | 0.695 |
| DT | 24 | 0.909 | 0.665 | 0.654 | 0.756 | 0.691 | 0.534 | 0.746 | 0.688 |
| DT | 25 | 0.862 | 0.685 | 0.670 | 0.747 | 0.701 | 0.548 | 0.741 | 0.698 |
| DT | 26 | 0.856 | 0.700 | 0.685 | 0.727 | 0.709 | 0.562 | 0.742 | 0.708 |
| DT | 27 | 0.889 | 0.676 | 0.692 | 0.722 | 0.706 | 0.554 | 0.745 | 0.704 |
| DT | 28 | 0.850 | 0.660 | 0.658 | 0.738 | 0.685 | 0.526 | 0.726 | 0.681 |
| DT | 29 | 0.888 | 0.662 | 0.661 | 0.738 | 0.689 | 0.528 | 0.737 | 0.687 |
| DT | 30 | 0.878 | 0.687 | 0.682 | 0.786 | 0.712 | 0.564 | 0.759 | 0.710 |
| DT | 31 | 0.850 | 0.690 | 0.674 | 0.738 | 0.703 | 0.555 | 0.738 | 0.700 |
| DT | 32 | 0.848 | 0.665 | 0.680 | 0.739 | 0.696 | 0.540 | 0.733 | 0.693 |
| DT | 33 | 0.896 | 0.654 | 0.675 | 0.767 | 0.696 | 0.540 | 0.748 | 0.693 |
| DT | 34 | 0.872 | 0.683 | 0.696 | 0.796 | 0.717 | 0.573 | 0.762 | 0.715 |
| DT | 35 | 0.852 | 0.674 | 0.660 | 0.739 | 0.690 | 0.533 | 0.731 | 0.688 |
| DT | 36 | 0.888 | 0.692 | 0.695 | 0.770 | 0.718 | 0.572 | 0.761 | 0.716 |
| DT | 37 | 0.840 | 0.661 | 0.657 | 0.758 | 0.686 | 0.528 | 0.729 | 0.683 |
| DT | 38 | 0.844 | 0.673 | 0.665 | 0.724 | 0.690 | 0.531 | 0.727 | 0.688 |
| DT | 39 | 0.843 | 0.652 | 0.650 | 0.740 | 0.677 | 0.514 | 0.721 | 0.675 |
| DT | 40 | 0.877 | 0.704 | 0.687 | 0.778 | 0.720 | 0.573 | 0.762 | 0.717 |
| DT | 41 | 0.901 | 0.667 | 0.672 | 0.766 | 0.700 | 0.546 | 0.752 | 0.697 |
| DT | 42 | 0.860 | 0.652 | 0.666 | 0.748 | 0.687 | 0.527 | 0.732 | 0.684 |
| DT | 43 | 0.865 | 0.677 | 0.671 | 0.741 | 0.697 | 0.541 | 0.738 | 0.695 |
| DT | 44 | 0.906 | 0.684 | 0.678 | 0.746 | 0.706 | 0.555 | 0.753 | 0.704 |
| DT | 45 | 0.841 | 0.654 | 0.653 | 0.734 | 0.679 | 0.516 | 0.720 | 0.676 |
| DT | 46 | 0.876 | 0.677 | 0.652 | 0.701 | 0.685 | 0.527 | 0.726 | 0.684 |
| DT | 47 | 0.873 | 0.660 | 0.666 | 0.759 | 0.692 | 0.533 | 0.740 | 0.689 |

|    |    |       |       |       |       |       |       |       |       |
|----|----|-------|-------|-------|-------|-------|-------|-------|-------|
| DT | 48 | 0.857 | 0.689 | 0.661 | 0.755 | 0.700 | 0.548 | 0.741 | 0.697 |
| DT | 49 | 0.846 | 0.677 | 0.670 | 0.761 | 0.698 | 0.543 | 0.738 | 0.695 |
| DT | 50 | 0.839 | 0.649 | 0.655 | 0.731 | 0.677 | 0.509 | 0.719 | 0.674 |
| DT | 51 | 0.830 | 0.706 | 0.677 | 0.710 | 0.706 | 0.562 | 0.731 | 0.703 |
| DT | 52 | 0.853 | 0.661 | 0.667 | 0.719 | 0.687 | 0.528 | 0.725 | 0.684 |
| DT | 53 | 0.842 | 0.662 | 0.658 | 0.725 | 0.682 | 0.518 | 0.722 | 0.681 |
| DT | 54 | 0.853 | 0.674 | 0.661 | 0.723 | 0.690 | 0.533 | 0.728 | 0.687 |
| DT | 55 | 0.908 | 0.674 | 0.668 | 0.727 | 0.696 | 0.540 | 0.744 | 0.694 |
| DT | 56 | 0.865 | 0.704 | 0.693 | 0.745 | 0.717 | 0.572 | 0.752 | 0.715 |
| DT | 57 | 0.843 | 0.651 | 0.641 | 0.722 | 0.672 | 0.506 | 0.714 | 0.668 |
| DT | 58 | 0.874 | 0.686 | 0.671 | 0.775 | 0.706 | 0.554 | 0.752 | 0.703 |
| DT | 59 | 0.852 | 0.688 | 0.668 | 0.738 | 0.699 | 0.546 | 0.737 | 0.697 |
| DT | 60 | 0.872 | 0.665 | 0.670 | 0.759 | 0.695 | 0.537 | 0.742 | 0.693 |
| DT | 61 | 0.850 | 0.682 | 0.653 | 0.737 | 0.690 | 0.534 | 0.730 | 0.688 |
| DT | 62 | 0.877 | 0.658 | 0.656 | 0.712 | 0.681 | 0.516 | 0.726 | 0.679 |
| DT | 63 | 0.830 | 0.651 | 0.649 | 0.756 | 0.677 | 0.510 | 0.722 | 0.675 |
| DT | 64 | 0.883 | 0.670 | 0.663 | 0.673 | 0.685 | 0.524 | 0.722 | 0.683 |
| DT | 65 | 0.850 | 0.676 | 0.654 | 0.711 | 0.685 | 0.523 | 0.723 | 0.683 |
| DT | 66 | 0.856 | 0.683 | 0.678 | 0.709 | 0.698 | 0.546 | 0.731 | 0.697 |
| DT | 67 | 0.845 | 0.638 | 0.641 | 0.727 | 0.667 | 0.497 | 0.713 | 0.664 |
| DT | 68 | 0.844 | 0.669 | 0.657 | 0.716 | 0.685 | 0.525 | 0.721 | 0.682 |
| DT | 69 | 0.865 | 0.694 | 0.696 | 0.731 | 0.713 | 0.565 | 0.747 | 0.712 |
| DT | 70 | 0.838 | 0.652 | 0.635 | 0.751 | 0.672 | 0.501 | 0.719 | 0.669 |
| DT | 71 | 0.824 | 0.665 | 0.671 | 0.727 | 0.688 | 0.529 | 0.722 | 0.686 |
| DT | 72 | 0.857 | 0.655 | 0.669 | 0.749 | 0.688 | 0.528 | 0.732 | 0.686 |

|     |    |       |       |       |       |       |       |       |       |
|-----|----|-------|-------|-------|-------|-------|-------|-------|-------|
| DT  | 73 | 0.870 | 0.677 | 0.667 | 0.753 | 0.698 | 0.542 | 0.742 | 0.695 |
| KNN | 1  | 0.349 | 0.512 | 0.371 | 0.371 | 0.420 | 0.190 | 0.401 | 0.424 |
| KNN | 2  | 0.871 | 0.606 | 0.582 | 0.546 | 0.610 | 0.433 | 0.651 | 0.609 |
| KNN | 3  | 0.890 | 0.629 | 0.630 | 0.615 | 0.649 | 0.487 | 0.691 | 0.648 |
| KNN | 4  | 0.890 | 0.653 | 0.651 | 0.750 | 0.684 | 0.527 | 0.736 | 0.680 |
| KNN | 5  | 0.915 | 0.672 | 0.655 | 0.772 | 0.698 | 0.547 | 0.754 | 0.694 |
| KNN | 6  | 0.920 | 0.681 | 0.657 | 0.795 | 0.705 | 0.559 | 0.763 | 0.700 |
| KNN | 7  | 0.880 | 0.669 | 0.665 | 0.773 | 0.698 | 0.550 | 0.747 | 0.694 |
| KNN | 8  | 0.895 | 0.700 | 0.672 | 0.783 | 0.715 | 0.575 | 0.762 | 0.711 |
| KNN | 9  | 0.924 | 0.714 | 0.679 | 0.797 | 0.728 | 0.594 | 0.778 | 0.723 |
| KNN | 10 | 0.932 | 0.694 | 0.678 | 0.838 | 0.723 | 0.581 | 0.785 | 0.720 |
| KNN | 11 | 0.887 | 0.682 | 0.686 | 0.811 | 0.716 | 0.571 | 0.766 | 0.712 |
| KNN | 12 | 0.863 | 0.678 | 0.667 | 0.844 | 0.709 | 0.566 | 0.763 | 0.704 |
| KNN | 13 | 0.867 | 0.685 | 0.675 | 0.835 | 0.714 | 0.573 | 0.766 | 0.710 |
| KNN | 14 | 0.872 | 0.702 | 0.698 | 0.858 | 0.733 | 0.600 | 0.783 | 0.729 |
| KNN | 15 | 0.900 | 0.708 | 0.698 | 0.848 | 0.736 | 0.605 | 0.788 | 0.732 |
| KNN | 16 | 0.893 | 0.698 | 0.680 | 0.851 | 0.725 | 0.589 | 0.780 | 0.720 |
| KNN | 17 | 0.884 | 0.706 | 0.693 | 0.828 | 0.731 | 0.596 | 0.778 | 0.726 |
| KNN | 18 | 0.928 | 0.723 | 0.705 | 0.850 | 0.747 | 0.618 | 0.802 | 0.744 |
| KNN | 19 | 0.908 | 0.705 | 0.695 | 0.841 | 0.734 | 0.600 | 0.787 | 0.730 |
| KNN | 20 | 0.928 | 0.705 | 0.700 | 0.854 | 0.739 | 0.604 | 0.797 | 0.735 |
| KNN | 21 | 0.912 | 0.698 | 0.693 | 0.856 | 0.732 | 0.595 | 0.790 | 0.728 |
| KNN | 22 | 0.929 | 0.715 | 0.699 | 0.846 | 0.741 | 0.610 | 0.797 | 0.738 |
| KNN | 23 | 0.950 | 0.713 | 0.699 | 0.859 | 0.744 | 0.613 | 0.805 | 0.740 |
| KNN | 24 | 0.932 | 0.690 | 0.684 | 0.853 | 0.726 | 0.586 | 0.790 | 0.722 |



|     |    |       |       |       |       |       |       |       |       |
|-----|----|-------|-------|-------|-------|-------|-------|-------|-------|
| KNN | 25 | 0.923 | 0.695 | 0.687 | 0.839 | 0.727 | 0.587 | 0.786 | 0.724 |
| KNN | 26 | 0.912 | 0.686 | 0.664 | 0.840 | 0.714 | 0.571 | 0.776 | 0.710 |
| KNN | 27 | 0.924 | 0.683 | 0.665 | 0.842 | 0.714 | 0.570 | 0.779 | 0.710 |
| KNN | 28 | 0.920 | 0.703 | 0.680 | 0.858 | 0.730 | 0.593 | 0.790 | 0.725 |
| KNN | 29 | 0.924 | 0.708 | 0.685 | 0.860 | 0.734 | 0.600 | 0.794 | 0.730 |
| KNN | 30 | 0.941 | 0.714 | 0.684 | 0.852 | 0.736 | 0.603 | 0.798 | 0.732 |
| KNN | 31 | 0.912 | 0.704 | 0.686 | 0.854 | 0.731 | 0.595 | 0.789 | 0.727 |
| KNN | 32 | 0.920 | 0.693 | 0.679 | 0.862 | 0.725 | 0.585 | 0.788 | 0.721 |
| KNN | 33 | 0.932 | 0.706 | 0.677 | 0.852 | 0.730 | 0.593 | 0.792 | 0.726 |
| KNN | 34 | 0.920 | 0.703 | 0.689 | 0.861 | 0.733 | 0.597 | 0.793 | 0.730 |
| KNN | 35 | 0.912 | 0.704 | 0.687 | 0.843 | 0.731 | 0.594 | 0.787 | 0.727 |
| KNN | 36 | 0.927 | 0.714 | 0.691 | 0.854 | 0.739 | 0.606 | 0.797 | 0.735 |
| KNN | 37 | 0.924 | 0.706 | 0.679 | 0.859 | 0.731 | 0.596 | 0.792 | 0.727 |
| KNN | 38 | 0.929 | 0.711 | 0.682 | 0.858 | 0.734 | 0.599 | 0.795 | 0.730 |
| KNN | 39 | 0.923 | 0.717 | 0.674 | 0.848 | 0.732 | 0.598 | 0.791 | 0.727 |
| KNN | 40 | 0.924 | 0.704 | 0.673 | 0.839 | 0.725 | 0.584 | 0.785 | 0.721 |
| KNN | 41 | 0.897 | 0.707 | 0.673 | 0.854 | 0.726 | 0.588 | 0.782 | 0.722 |
| KNN | 42 | 0.924 | 0.698 | 0.670 | 0.855 | 0.724 | 0.585 | 0.787 | 0.719 |
| KNN | 43 | 0.920 | 0.705 | 0.673 | 0.853 | 0.728 | 0.591 | 0.788 | 0.723 |
| KNN | 44 | 0.924 | 0.710 | 0.673 | 0.836 | 0.728 | 0.591 | 0.786 | 0.723 |
| KNN | 45 | 0.916 | 0.713 | 0.678 | 0.840 | 0.731 | 0.598 | 0.787 | 0.726 |
| KNN | 46 | 0.937 | 0.717 | 0.675 | 0.830 | 0.732 | 0.599 | 0.790 | 0.727 |
| KNN | 47 | 0.912 | 0.707 | 0.673 | 0.837 | 0.726 | 0.591 | 0.782 | 0.721 |
| KNN | 48 | 0.907 | 0.706 | 0.669 | 0.831 | 0.723 | 0.587 | 0.778 | 0.718 |
| KNN | 49 | 0.899 | 0.718 | 0.680 | 0.835 | 0.732 | 0.600 | 0.783 | 0.727 |

|     |    |       |       |       |       |       |       |       |       |
|-----|----|-------|-------|-------|-------|-------|-------|-------|-------|
| KNN | 50 | 0.904 | 0.696 | 0.654 | 0.813 | 0.711 | 0.568 | 0.767 | 0.706 |
| KNN | 51 | 0.904 | 0.705 | 0.673 | 0.828 | 0.724 | 0.588 | 0.778 | 0.719 |
| KNN | 52 | 0.920 | 0.697 | 0.668 | 0.828 | 0.720 | 0.579 | 0.778 | 0.715 |
| KNN | 53 | 0.904 | 0.703 | 0.665 | 0.815 | 0.718 | 0.578 | 0.772 | 0.713 |
| KNN | 54 | 0.916 | 0.696 | 0.664 | 0.822 | 0.717 | 0.575 | 0.775 | 0.712 |
| KNN | 55 | 0.916 | 0.694 | 0.674 | 0.843 | 0.722 | 0.581 | 0.782 | 0.717 |
| KNN | 56 | 0.908 | 0.683 | 0.665 | 0.835 | 0.712 | 0.567 | 0.773 | 0.708 |
| KNN | 57 | 0.912 | 0.671 | 0.653 | 0.821 | 0.702 | 0.554 | 0.764 | 0.697 |
| KNN | 58 | 0.916 | 0.672 | 0.653 | 0.819 | 0.702 | 0.553 | 0.765 | 0.697 |
| KNN | 59 | 0.920 | 0.680 | 0.651 | 0.815 | 0.705 | 0.559 | 0.767 | 0.700 |
| KNN | 60 | 0.924 | 0.686 | 0.656 | 0.825 | 0.710 | 0.565 | 0.773 | 0.705 |
| KNN | 61 | 0.893 | 0.682 | 0.673 | 0.834 | 0.714 | 0.572 | 0.770 | 0.710 |
| KNN | 62 | 0.920 | 0.684 | 0.655 | 0.810 | 0.707 | 0.561 | 0.767 | 0.702 |
| KNN | 63 | 0.933 | 0.699 | 0.665 | 0.827 | 0.720 | 0.581 | 0.781 | 0.715 |
| KNN | 64 | 0.897 | 0.691 | 0.664 | 0.830 | 0.714 | 0.573 | 0.771 | 0.709 |
| KNN | 65 | 0.916 | 0.683 | 0.668 | 0.837 | 0.714 | 0.571 | 0.776 | 0.710 |
| KNN | 66 | 0.941 | 0.695 | 0.667 | 0.824 | 0.719 | 0.578 | 0.782 | 0.714 |
| KNN | 67 | 0.900 | 0.700 | 0.669 | 0.833 | 0.721 | 0.584 | 0.776 | 0.716 |
| KNN | 68 | 0.916 | 0.679 | 0.662 | 0.820 | 0.709 | 0.562 | 0.769 | 0.704 |
| KNN | 69 | 0.916 | 0.696 | 0.667 | 0.817 | 0.717 | 0.578 | 0.774 | 0.712 |
| KNN | 70 | 0.941 | 0.690 | 0.656 | 0.793 | 0.709 | 0.564 | 0.770 | 0.705 |
| KNN | 71 | 0.924 | 0.698 | 0.664 | 0.813 | 0.717 | 0.578 | 0.775 | 0.712 |
| KNN | 72 | 0.928 | 0.689 | 0.657 | 0.801 | 0.709 | 0.566 | 0.769 | 0.705 |
| KNN | 73 | 0.907 | 0.690 | 0.667 | 0.806 | 0.713 | 0.571 | 0.768 | 0.708 |
| RF  | 1  | 0.348 | 0.510 | 0.349 | 0.381 | 0.413 | 0.176 | 0.397 | 0.415 |

|    |    |       |       |       |       |       |       |       |       |
|----|----|-------|-------|-------|-------|-------|-------|-------|-------|
| RF | 2  | 0.852 | 0.640 | 0.530 | 0.475 | 0.595 | 0.411 | 0.624 | 0.592 |
| RF | 3  | 0.866 | 0.664 | 0.573 | 0.567 | 0.634 | 0.468 | 0.667 | 0.630 |
| RF | 4  | 0.874 | 0.689 | 0.610 | 0.711 | 0.678 | 0.528 | 0.721 | 0.671 |
| RF | 5  | 0.899 | 0.713 | 0.624 | 0.731 | 0.698 | 0.561 | 0.742 | 0.690 |
| RF | 6  | 0.900 | 0.725 | 0.646 | 0.744 | 0.713 | 0.581 | 0.754 | 0.706 |
| RF | 7  | 0.907 | 0.741 | 0.659 | 0.785 | 0.731 | 0.611 | 0.773 | 0.722 |
| RF | 8  | 0.908 | 0.738 | 0.638 | 0.782 | 0.722 | 0.598 | 0.767 | 0.712 |
| RF | 9  | 0.900 | 0.744 | 0.645 | 0.795 | 0.728 | 0.606 | 0.771 | 0.718 |
| RF | 10 | 0.892 | 0.731 | 0.629 | 0.795 | 0.716 | 0.590 | 0.762 | 0.706 |
| RF | 11 | 0.896 | 0.736 | 0.629 | 0.811 | 0.720 | 0.598 | 0.768 | 0.709 |
| RF | 12 | 0.900 | 0.733 | 0.632 | 0.808 | 0.720 | 0.597 | 0.768 | 0.710 |
| RF | 13 | 0.904 | 0.734 | 0.623 | 0.806 | 0.717 | 0.594 | 0.766 | 0.706 |
| RF | 14 | 0.920 | 0.737 | 0.619 | 0.818 | 0.721 | 0.603 | 0.774 | 0.708 |
| RF | 15 | 0.920 | 0.734 | 0.612 | 0.826 | 0.718 | 0.599 | 0.773 | 0.705 |
| RF | 16 | 0.907 | 0.746 | 0.629 | 0.829 | 0.729 | 0.616 | 0.778 | 0.716 |
| RF | 17 | 0.896 | 0.758 | 0.658 | 0.840 | 0.744 | 0.637 | 0.788 | 0.733 |
| RF | 18 | 0.908 | 0.759 | 0.660 | 0.828 | 0.745 | 0.636 | 0.789 | 0.735 |
| RF | 19 | 0.889 | 0.751 | 0.655 | 0.831 | 0.739 | 0.627 | 0.781 | 0.728 |
| RF | 20 | 0.897 | 0.762 | 0.665 | 0.825 | 0.747 | 0.638 | 0.787 | 0.737 |
| RF | 21 | 0.897 | 0.758 | 0.656 | 0.837 | 0.744 | 0.635 | 0.787 | 0.733 |
| RF | 22 | 0.904 | 0.746 | 0.654 | 0.836 | 0.737 | 0.621 | 0.785 | 0.727 |
| RF | 23 | 0.908 | 0.754 | 0.661 | 0.836 | 0.744 | 0.632 | 0.790 | 0.734 |
| RF | 24 | 0.908 | 0.753 | 0.651 | 0.831 | 0.739 | 0.626 | 0.786 | 0.729 |
| RF | 25 | 0.908 | 0.751 | 0.651 | 0.839 | 0.739 | 0.627 | 0.787 | 0.729 |
| RF | 26 | 0.912 | 0.755 | 0.652 | 0.831 | 0.741 | 0.628 | 0.788 | 0.730 |

|    |    |       |       |       |       |       |       |       |       |
|----|----|-------|-------|-------|-------|-------|-------|-------|-------|
| RF | 27 | 0.904 | 0.760 | 0.660 | 0.835 | 0.746 | 0.638 | 0.790 | 0.735 |
| RF | 28 | 0.900 | 0.741 | 0.639 | 0.829 | 0.729 | 0.611 | 0.777 | 0.718 |
| RF | 29 | 0.904 | 0.755 | 0.656 | 0.830 | 0.741 | 0.630 | 0.786 | 0.731 |
| RF | 30 | 0.912 | 0.757 | 0.663 | 0.825 | 0.744 | 0.631 | 0.789 | 0.735 |
| RF | 31 | 0.912 | 0.765 | 0.669 | 0.839 | 0.752 | 0.649 | 0.796 | 0.742 |
| RF | 32 | 0.916 | 0.748 | 0.654 | 0.840 | 0.739 | 0.624 | 0.790 | 0.730 |
| RF | 33 | 0.920 | 0.754 | 0.665 | 0.846 | 0.747 | 0.634 | 0.796 | 0.737 |
| RF | 34 | 0.912 | 0.761 | 0.663 | 0.832 | 0.747 | 0.638 | 0.792 | 0.738 |
| RF | 35 | 0.916 | 0.752 | 0.644 | 0.836 | 0.738 | 0.627 | 0.787 | 0.726 |
| RF | 36 | 0.916 | 0.755 | 0.659 | 0.832 | 0.743 | 0.630 | 0.790 | 0.733 |
| RF | 37 | 0.920 | 0.754 | 0.652 | 0.842 | 0.742 | 0.631 | 0.792 | 0.731 |
| RF | 38 | 0.916 | 0.750 | 0.654 | 0.833 | 0.739 | 0.625 | 0.788 | 0.729 |
| RF | 39 | 0.916 | 0.745 | 0.643 | 0.834 | 0.734 | 0.619 | 0.785 | 0.723 |
| RF | 40 | 0.916 | 0.749 | 0.644 | 0.830 | 0.736 | 0.621 | 0.785 | 0.725 |
| RF | 41 | 0.916 | 0.757 | 0.654 | 0.839 | 0.744 | 0.635 | 0.791 | 0.733 |
| RF | 42 | 0.920 | 0.757 | 0.647 | 0.830 | 0.741 | 0.631 | 0.789 | 0.729 |
| RF | 43 | 0.916 | 0.739 | 0.624 | 0.822 | 0.723 | 0.604 | 0.775 | 0.711 |
| RF | 44 | 0.912 | 0.757 | 0.649 | 0.831 | 0.741 | 0.631 | 0.787 | 0.729 |
| RF | 45 | 0.908 | 0.754 | 0.656 | 0.841 | 0.742 | 0.630 | 0.790 | 0.732 |
| RF | 46 | 0.920 | 0.759 | 0.648 | 0.828 | 0.741 | 0.632 | 0.789 | 0.730 |
| RF | 47 | 0.916 | 0.753 | 0.642 | 0.834 | 0.738 | 0.628 | 0.787 | 0.726 |
| RF | 48 | 0.908 | 0.750 | 0.639 | 0.828 | 0.734 | 0.624 | 0.781 | 0.722 |
| RF | 49 | 0.920 | 0.763 | 0.653 | 0.823 | 0.744 | 0.636 | 0.790 | 0.733 |
| RF | 50 | 0.908 | 0.751 | 0.646 | 0.840 | 0.738 | 0.626 | 0.786 | 0.727 |
| RF | 51 | 0.908 | 0.748 | 0.645 | 0.834 | 0.736 | 0.622 | 0.784 | 0.725 |

|     |    |       |       |       |       |       |       |       |       |
|-----|----|-------|-------|-------|-------|-------|-------|-------|-------|
| RF  | 52 | 0.912 | 0.752 | 0.647 | 0.839 | 0.739 | 0.627 | 0.787 | 0.727 |
| RF  | 53 | 0.904 | 0.754 | 0.651 | 0.835 | 0.740 | 0.630 | 0.786 | 0.729 |
| RF  | 54 | 0.912 | 0.741 | 0.630 | 0.840 | 0.728 | 0.613 | 0.781 | 0.716 |
| RF  | 55 | 0.904 | 0.758 | 0.650 | 0.836 | 0.742 | 0.635 | 0.787 | 0.730 |
| RF  | 56 | 0.908 | 0.749 | 0.647 | 0.835 | 0.736 | 0.621 | 0.785 | 0.726 |
| RF  | 57 | 0.900 | 0.753 | 0.640 | 0.837 | 0.736 | 0.627 | 0.783 | 0.724 |
| RF  | 58 | 0.916 | 0.748 | 0.635 | 0.830 | 0.733 | 0.620 | 0.783 | 0.721 |
| RF  | 59 | 0.912 | 0.755 | 0.653 | 0.841 | 0.742 | 0.631 | 0.790 | 0.732 |
| RF  | 60 | 0.920 | 0.750 | 0.641 | 0.842 | 0.737 | 0.626 | 0.788 | 0.725 |
| RF  | 61 | 0.908 | 0.751 | 0.633 | 0.834 | 0.733 | 0.624 | 0.781 | 0.720 |
| RF  | 62 | 0.920 | 0.754 | 0.644 | 0.839 | 0.739 | 0.629 | 0.789 | 0.728 |
| RF  | 63 | 0.912 | 0.759 | 0.644 | 0.831 | 0.741 | 0.634 | 0.787 | 0.728 |
| RF  | 64 | 0.912 | 0.755 | 0.644 | 0.835 | 0.739 | 0.629 | 0.787 | 0.728 |
| RF  | 65 | 0.916 | 0.753 | 0.645 | 0.838 | 0.739 | 0.626 | 0.788 | 0.727 |
| RF  | 66 | 0.912 | 0.751 | 0.643 | 0.830 | 0.736 | 0.625 | 0.784 | 0.725 |
| RF  | 67 | 0.904 | 0.763 | 0.647 | 0.830 | 0.743 | 0.637 | 0.786 | 0.731 |
| RF  | 68 | 0.908 | 0.744 | 0.630 | 0.833 | 0.728 | 0.612 | 0.779 | 0.716 |
| RF  | 69 | 0.904 | 0.752 | 0.640 | 0.830 | 0.735 | 0.623 | 0.782 | 0.723 |
| RF  | 70 | 0.912 | 0.744 | 0.626 | 0.827 | 0.727 | 0.610 | 0.777 | 0.714 |
| RF  | 71 | 0.916 | 0.753 | 0.652 | 0.833 | 0.740 | 0.627 | 0.788 | 0.730 |
| RF  | 72 | 0.904 | 0.748 | 0.638 | 0.828 | 0.732 | 0.617 | 0.779 | 0.720 |
| RF  | 73 | 0.908 | 0.747 | 0.644 | 0.847 | 0.736 | 0.620 | 0.786 | 0.725 |
| SVM | 1  | 0.314 | 0.720 | 0.000 | 0.384 | 0.456 | 0.320 | 0.354 | 0.343 |
| SVM | 2  | 0.810 | 0.702 | 0.450 | 0.344 | 0.594 | 0.424 | 0.576 | 0.564 |
| SVM | 3  | 0.844 | 0.696 | 0.529 | 0.500 | 0.634 | 0.484 | 0.642 | 0.615 |

|     |    |       |       |       |       |       |       |       |       |
|-----|----|-------|-------|-------|-------|-------|-------|-------|-------|
| SVM | 4  | 0.825 | 0.729 | 0.599 | 0.706 | 0.692 | 0.569 | 0.715 | 0.678 |
| SVM | 5  | 0.893 | 0.734 | 0.605 | 0.745 | 0.705 | 0.585 | 0.744 | 0.691 |
| SVM | 6  | 0.866 | 0.720 | 0.616 | 0.749 | 0.699 | 0.566 | 0.738 | 0.689 |
| SVM | 7  | 0.873 | 0.720 | 0.613 | 0.753 | 0.699 | 0.567 | 0.740 | 0.689 |
| SVM | 8  | 0.877 | 0.725 | 0.618 | 0.791 | 0.708 | 0.578 | 0.753 | 0.697 |
| SVM | 9  | 0.893 | 0.729 | 0.612 | 0.799 | 0.710 | 0.583 | 0.758 | 0.698 |
| SVM | 10 | 0.876 | 0.725 | 0.630 | 0.834 | 0.717 | 0.591 | 0.766 | 0.706 |
| SVM | 11 | 0.874 | 0.720 | 0.619 | 0.809 | 0.707 | 0.575 | 0.755 | 0.697 |
| SVM | 12 | 0.880 | 0.712 | 0.618 | 0.809 | 0.704 | 0.566 | 0.755 | 0.694 |
| SVM | 13 | 0.879 | 0.726 | 0.635 | 0.825 | 0.717 | 0.587 | 0.766 | 0.708 |
| SVM | 14 | 0.887 | 0.704 | 0.637 | 0.828 | 0.709 | 0.568 | 0.764 | 0.702 |
| SVM | 15 | 0.892 | 0.704 | 0.628 | 0.812 | 0.704 | 0.563 | 0.759 | 0.697 |
| SVM | 16 | 0.888 | 0.705 | 0.630 | 0.791 | 0.702 | 0.559 | 0.753 | 0.695 |
| SVM | 17 | 0.871 | 0.725 | 0.679 | 0.814 | 0.730 | 0.597 | 0.772 | 0.725 |
| SVM | 18 | 0.880 | 0.735 | 0.688 | 0.826 | 0.740 | 0.614 | 0.782 | 0.735 |
| SVM | 19 | 0.888 | 0.740 | 0.697 | 0.826 | 0.746 | 0.622 | 0.788 | 0.741 |
| SVM | 20 | 0.878 | 0.737 | 0.697 | 0.818 | 0.743 | 0.616 | 0.782 | 0.739 |
| SVM | 21 | 0.878 | 0.736 | 0.696 | 0.822 | 0.742 | 0.615 | 0.783 | 0.738 |
| SVM | 22 | 0.870 | 0.734 | 0.695 | 0.816 | 0.740 | 0.613 | 0.779 | 0.736 |
| SVM | 23 | 0.878 | 0.735 | 0.693 | 0.814 | 0.740 | 0.612 | 0.780 | 0.736 |
| SVM | 24 | 0.889 | 0.741 | 0.695 | 0.815 | 0.744 | 0.620 | 0.785 | 0.740 |
| SVM | 25 | 0.885 | 0.739 | 0.694 | 0.815 | 0.743 | 0.618 | 0.783 | 0.738 |
| SVM | 26 | 0.893 | 0.730 | 0.692 | 0.851 | 0.743 | 0.617 | 0.791 | 0.738 |
| SVM | 27 | 0.897 | 0.731 | 0.691 | 0.846 | 0.743 | 0.616 | 0.791 | 0.738 |
| SVM | 28 | 0.897 | 0.720 | 0.679 | 0.845 | 0.733 | 0.601 | 0.785 | 0.729 |

|     |    |       |       |       |       |       |       |       |       |
|-----|----|-------|-------|-------|-------|-------|-------|-------|-------|
| SVM | 29 | 0.878 | 0.728 | 0.698 | 0.855 | 0.744 | 0.617 | 0.790 | 0.739 |
| SVM | 30 | 0.878 | 0.731 | 0.711 | 0.870 | 0.752 | 0.627 | 0.797 | 0.748 |
| SVM | 31 | 0.893 | 0.725 | 0.708 | 0.873 | 0.749 | 0.623 | 0.800 | 0.746 |
| SVM | 32 | 0.885 | 0.729 | 0.714 | 0.864 | 0.752 | 0.627 | 0.798 | 0.748 |
| SVM | 33 | 0.870 | 0.730 | 0.717 | 0.863 | 0.752 | 0.629 | 0.795 | 0.749 |
| SVM | 34 | 0.881 | 0.737 | 0.726 | 0.881 | 0.761 | 0.641 | 0.806 | 0.758 |
| SVM | 35 | 0.885 | 0.735 | 0.729 | 0.875 | 0.761 | 0.640 | 0.806 | 0.758 |
| SVM | 36 | 0.878 | 0.729 | 0.719 | 0.863 | 0.753 | 0.629 | 0.797 | 0.750 |
| SVM | 37 | 0.874 | 0.724 | 0.716 | 0.863 | 0.749 | 0.623 | 0.794 | 0.746 |
| SVM | 38 | 0.870 | 0.724 | 0.716 | 0.862 | 0.749 | 0.624 | 0.793 | 0.746 |
| SVM | 39 | 0.867 | 0.723 | 0.720 | 0.870 | 0.751 | 0.625 | 0.795 | 0.747 |
| SVM | 40 | 0.878 | 0.716 | 0.714 | 0.873 | 0.747 | 0.619 | 0.795 | 0.744 |
| SVM | 41 | 0.878 | 0.716 | 0.712 | 0.866 | 0.746 | 0.617 | 0.793 | 0.742 |
| SVM | 42 | 0.889 | 0.719 | 0.707 | 0.869 | 0.746 | 0.617 | 0.796 | 0.742 |
| SVM | 43 | 0.881 | 0.729 | 0.714 | 0.848 | 0.750 | 0.626 | 0.793 | 0.746 |
| SVM | 44 | 0.897 | 0.716 | 0.704 | 0.864 | 0.744 | 0.614 | 0.795 | 0.740 |
| SVM | 45 | 0.893 | 0.718 | 0.708 | 0.864 | 0.746 | 0.617 | 0.796 | 0.742 |
| SVM | 46 | 0.904 | 0.720 | 0.707 | 0.841 | 0.744 | 0.615 | 0.793 | 0.741 |
| SVM | 47 | 0.900 | 0.716 | 0.703 | 0.841 | 0.741 | 0.610 | 0.790 | 0.737 |
| SVM | 48 | 0.893 | 0.714 | 0.702 | 0.854 | 0.741 | 0.610 | 0.791 | 0.737 |
| SVM | 49 | 0.893 | 0.714 | 0.699 | 0.847 | 0.739 | 0.607 | 0.788 | 0.735 |
| SVM | 50 | 0.908 | 0.721 | 0.709 | 0.849 | 0.747 | 0.618 | 0.797 | 0.743 |
| SVM | 51 | 0.920 | 0.720 | 0.701 | 0.841 | 0.743 | 0.612 | 0.796 | 0.739 |
| SVM | 52 | 0.920 | 0.727 | 0.709 | 0.847 | 0.749 | 0.622 | 0.801 | 0.746 |
| SVM | 53 | 0.920 | 0.727 | 0.705 | 0.844 | 0.747 | 0.619 | 0.799 | 0.744 |

|     |    |       |       |       |       |       |       |       |       |
|-----|----|-------|-------|-------|-------|-------|-------|-------|-------|
| SVM | 54 | 0.920 | 0.726 | 0.704 | 0.840 | 0.747 | 0.618 | 0.798 | 0.743 |
| SVM | 55 | 0.916 | 0.724 | 0.700 | 0.839 | 0.744 | 0.614 | 0.795 | 0.740 |
| SVM | 56 | 0.916 | 0.700 | 0.683 | 0.842 | 0.728 | 0.589 | 0.785 | 0.724 |
| SVM | 57 | 0.912 | 0.700 | 0.686 | 0.847 | 0.729 | 0.591 | 0.786 | 0.725 |
| SVM | 58 | 0.904 | 0.699 | 0.694 | 0.858 | 0.733 | 0.596 | 0.789 | 0.729 |
| SVM | 59 | 0.904 | 0.697 | 0.691 | 0.858 | 0.731 | 0.593 | 0.788 | 0.727 |
| SVM | 60 | 0.904 | 0.699 | 0.696 | 0.858 | 0.733 | 0.597 | 0.789 | 0.730 |
| SVM | 61 | 0.900 | 0.699 | 0.695 | 0.858 | 0.733 | 0.596 | 0.788 | 0.729 |
| SVM | 62 | 0.908 | 0.696 | 0.688 | 0.863 | 0.730 | 0.592 | 0.789 | 0.726 |
| SVM | 63 | 0.916 | 0.686 | 0.679 | 0.863 | 0.723 | 0.580 | 0.786 | 0.719 |
| SVM | 64 | 0.916 | 0.685 | 0.678 | 0.863 | 0.722 | 0.579 | 0.786 | 0.718 |
| SVM | 65 | 0.916 | 0.697 | 0.688 | 0.863 | 0.731 | 0.592 | 0.791 | 0.727 |
| SVM | 66 | 0.920 | 0.696 | 0.691 | 0.866 | 0.732 | 0.594 | 0.793 | 0.728 |
| SVM | 67 | 0.916 | 0.699 | 0.692 | 0.863 | 0.733 | 0.596 | 0.793 | 0.729 |
| SVM | 68 | 0.916 | 0.702 | 0.688 | 0.858 | 0.732 | 0.595 | 0.791 | 0.728 |
| SVM | 69 | 0.924 | 0.699 | 0.688 | 0.853 | 0.731 | 0.593 | 0.791 | 0.727 |
| SVM | 70 | 0.924 | 0.695 | 0.687 | 0.854 | 0.729 | 0.591 | 0.790 | 0.725 |
| SVM | 71 | 0.924 | 0.699 | 0.690 | 0.862 | 0.733 | 0.596 | 0.794 | 0.729 |
| SVM | 72 | 0.924 | 0.701 | 0.690 | 0.859 | 0.733 | 0.597 | 0.794 | 0.730 |
| SVM | 73 | 0.924 | 0.707 | 0.694 | 0.859 | 0.737 | 0.603 | 0.796 | 0.733 |

(3) IFS results on the MCFS feature list

| Classification algorithms | Number of features | unvaccinated healthcare workers | healthcare workers within 60 days after vaccination | healthcare workers 60–180 days after vaccination | healthcare workers over 180 days after vaccination | ACC | MCC | Macro F1 | Weighted F1 |
|---------------------------|--------------------|---------------------------------|-----------------------------------------------------|--------------------------------------------------|----------------------------------------------------|-----|-----|----------|-------------|
|---------------------------|--------------------|---------------------------------|-----------------------------------------------------|--------------------------------------------------|----------------------------------------------------|-----|-----|----------|-------------|



|    |    |       |       |       |       |       |       |       |       |
|----|----|-------|-------|-------|-------|-------|-------|-------|-------|
| DT | 1  | 0.783 | 0.537 | 0.529 | 0.297 | 0.517 | 0.304 | 0.537 | 0.527 |
| DT | 2  | 0.817 | 0.583 | 0.557 | 0.489 | 0.579 | 0.383 | 0.611 | 0.579 |
| DT | 3  | 0.853 | 0.589 | 0.571 | 0.610 | 0.607 | 0.416 | 0.656 | 0.603 |
| DT | 4  | 0.834 | 0.641 | 0.621 | 0.604 | 0.644 | 0.465 | 0.675 | 0.643 |
| DT | 5  | 0.841 | 0.625 | 0.618 | 0.640 | 0.642 | 0.462 | 0.681 | 0.640 |
| DT | 6  | 0.863 | 0.616 | 0.622 | 0.677 | 0.646 | 0.465 | 0.694 | 0.643 |
| DT | 7  | 0.865 | 0.648 | 0.617 | 0.630 | 0.651 | 0.482 | 0.690 | 0.649 |
| DT | 8  | 0.888 | 0.655 | 0.635 | 0.653 | 0.666 | 0.498 | 0.708 | 0.664 |
| DT | 9  | 0.875 | 0.679 | 0.650 | 0.673 | 0.682 | 0.523 | 0.719 | 0.681 |
| DT | 10 | 0.892 | 0.683 | 0.662 | 0.659 | 0.688 | 0.534 | 0.724 | 0.687 |
| DT | 11 | 0.883 | 0.659 | 0.647 | 0.732 | 0.681 | 0.520 | 0.730 | 0.678 |
| DT | 12 | 0.911 | 0.672 | 0.677 | 0.713 | 0.698 | 0.543 | 0.743 | 0.697 |
| DT | 13 | 0.877 | 0.680 | 0.677 | 0.775 | 0.706 | 0.553 | 0.752 | 0.704 |
| DT | 14 | 0.870 | 0.686 | 0.695 | 0.770 | 0.714 | 0.567 | 0.755 | 0.712 |
| DT | 15 | 0.883 | 0.658 | 0.670 | 0.744 | 0.691 | 0.530 | 0.739 | 0.689 |
| DT | 16 | 0.862 | 0.702 | 0.694 | 0.754 | 0.717 | 0.571 | 0.753 | 0.716 |
| DT | 17 | 0.885 | 0.709 | 0.701 | 0.787 | 0.729 | 0.589 | 0.771 | 0.727 |
| DT | 18 | 0.857 | 0.668 | 0.667 | 0.743 | 0.692 | 0.535 | 0.734 | 0.689 |
| DT | 19 | 0.861 | 0.708 | 0.682 | 0.753 | 0.715 | 0.571 | 0.751 | 0.713 |
| DT | 20 | 0.842 | 0.689 | 0.680 | 0.791 | 0.710 | 0.562 | 0.751 | 0.707 |
| DT | 21 | 0.840 | 0.699 | 0.689 | 0.744 | 0.712 | 0.567 | 0.743 | 0.710 |
| DT | 22 | 0.869 | 0.681 | 0.673 | 0.753 | 0.701 | 0.549 | 0.744 | 0.699 |
| DT | 23 | 0.888 | 0.695 | 0.687 | 0.776 | 0.717 | 0.575 | 0.762 | 0.715 |
| DT | 24 | 0.873 | 0.693 | 0.683 | 0.752 | 0.710 | 0.561 | 0.750 | 0.708 |
| DT | 25 | 0.866 | 0.707 | 0.696 | 0.765 | 0.723 | 0.581 | 0.759 | 0.720 |

|    |    |       |       |       |       |       |       |       |       |
|----|----|-------|-------|-------|-------|-------|-------|-------|-------|
| DT | 26 | 0.877 | 0.683 | 0.673 | 0.740 | 0.701 | 0.549 | 0.743 | 0.699 |
| DT | 27 | 0.828 | 0.658 | 0.670 | 0.790 | 0.692 | 0.532 | 0.736 | 0.689 |
| DT | 28 | 0.852 | 0.705 | 0.681 | 0.780 | 0.716 | 0.571 | 0.755 | 0.713 |
| DT | 29 | 0.867 | 0.656 | 0.654 | 0.760 | 0.685 | 0.526 | 0.734 | 0.682 |
| DT | 30 | 0.853 | 0.684 | 0.665 | 0.765 | 0.700 | 0.547 | 0.742 | 0.697 |
| DT | 31 | 0.857 | 0.698 | 0.687 | 0.768 | 0.714 | 0.568 | 0.752 | 0.712 |
| DT | 32 | 0.863 | 0.653 | 0.651 | 0.790 | 0.685 | 0.524 | 0.739 | 0.682 |
| DT | 33 | 0.866 | 0.674 | 0.677 | 0.791 | 0.704 | 0.551 | 0.752 | 0.702 |
| DT | 34 | 0.879 | 0.665 | 0.656 | 0.779 | 0.691 | 0.530 | 0.745 | 0.689 |
| DT | 35 | 0.880 | 0.699 | 0.679 | 0.721 | 0.708 | 0.558 | 0.745 | 0.706 |
| DT | 36 | 0.886 | 0.655 | 0.660 | 0.767 | 0.689 | 0.528 | 0.742 | 0.686 |
| DT | 37 | 0.874 | 0.686 | 0.684 | 0.804 | 0.714 | 0.565 | 0.762 | 0.712 |
| DT | 38 | 0.865 | 0.682 | 0.681 | 0.745 | 0.704 | 0.553 | 0.743 | 0.702 |
| DT | 39 | 0.878 | 0.673 | 0.654 | 0.749 | 0.690 | 0.530 | 0.739 | 0.688 |
| DT | 40 | 0.857 | 0.674 | 0.660 | 0.765 | 0.694 | 0.538 | 0.739 | 0.691 |
| DT | 41 | 0.862 | 0.699 | 0.693 | 0.751 | 0.716 | 0.569 | 0.751 | 0.714 |
| DT | 42 | 0.840 | 0.638 | 0.652 | 0.751 | 0.674 | 0.508 | 0.720 | 0.671 |
| DT | 43 | 0.903 | 0.679 | 0.679 | 0.768 | 0.708 | 0.556 | 0.757 | 0.705 |
| DT | 44 | 0.851 | 0.643 | 0.679 | 0.785 | 0.692 | 0.532 | 0.739 | 0.689 |
| DT | 45 | 0.895 | 0.692 | 0.675 | 0.748 | 0.708 | 0.557 | 0.753 | 0.706 |
| DT | 46 | 0.887 | 0.688 | 0.679 | 0.751 | 0.707 | 0.556 | 0.751 | 0.705 |
| DT | 47 | 0.838 | 0.678 | 0.696 | 0.723 | 0.704 | 0.555 | 0.734 | 0.702 |
| DT | 48 | 0.870 | 0.669 | 0.663 | 0.713 | 0.688 | 0.525 | 0.729 | 0.686 |
| DT | 49 | 0.870 | 0.675 | 0.666 | 0.739 | 0.695 | 0.539 | 0.737 | 0.692 |
| DT | 50 | 0.873 | 0.676 | 0.674 | 0.728 | 0.697 | 0.540 | 0.738 | 0.695 |

|     |    |       |       |       |       |       |       |       |       |
|-----|----|-------|-------|-------|-------|-------|-------|-------|-------|
| DT  | 51 | 0.879 | 0.686 | 0.674 | 0.748 | 0.705 | 0.556 | 0.747 | 0.702 |
| DT  | 52 | 0.844 | 0.686 | 0.677 | 0.758 | 0.704 | 0.551 | 0.741 | 0.701 |
| DT  | 53 | 0.877 | 0.682 | 0.668 | 0.760 | 0.701 | 0.547 | 0.747 | 0.699 |
| DT  | 54 | 0.878 | 0.670 | 0.677 | 0.762 | 0.701 | 0.548 | 0.747 | 0.698 |
| DT  | 55 | 0.890 | 0.656 | 0.656 | 0.742 | 0.685 | 0.522 | 0.736 | 0.682 |
| DT  | 56 | 0.856 | 0.672 | 0.667 | 0.705 | 0.689 | 0.530 | 0.725 | 0.687 |
| DT  | 57 | 0.851 | 0.643 | 0.650 | 0.747 | 0.675 | 0.509 | 0.723 | 0.672 |
| DT  | 58 | 0.850 | 0.660 | 0.671 | 0.703 | 0.685 | 0.524 | 0.721 | 0.684 |
| DT  | 59 | 0.851 | 0.679 | 0.695 | 0.774 | 0.711 | 0.561 | 0.750 | 0.708 |
| DT  | 60 | 0.847 | 0.689 | 0.674 | 0.728 | 0.700 | 0.546 | 0.734 | 0.698 |
| DT  | 61 | 0.887 | 0.672 | 0.678 | 0.772 | 0.704 | 0.549 | 0.752 | 0.701 |
| DT  | 62 | 0.873 | 0.675 | 0.694 | 0.778 | 0.712 | 0.564 | 0.755 | 0.709 |
| DT  | 63 | 0.878 | 0.682 | 0.679 | 0.745 | 0.704 | 0.552 | 0.746 | 0.702 |
| DT  | 64 | 0.880 | 0.686 | 0.674 | 0.731 | 0.702 | 0.548 | 0.743 | 0.700 |
| DT  | 65 | 0.846 | 0.689 | 0.686 | 0.740 | 0.706 | 0.557 | 0.740 | 0.704 |
| DT  | 66 | 0.871 | 0.668 | 0.650 | 0.729 | 0.685 | 0.525 | 0.729 | 0.682 |
| DT  | 67 | 0.875 | 0.690 | 0.698 | 0.746 | 0.715 | 0.571 | 0.752 | 0.713 |
| DT  | 68 | 0.871 | 0.685 | 0.684 | 0.774 | 0.711 | 0.566 | 0.753 | 0.708 |
| DT  | 69 | 0.815 | 0.639 | 0.675 | 0.742 | 0.682 | 0.520 | 0.718 | 0.679 |
| DT  | 70 | 0.892 | 0.695 | 0.667 | 0.705 | 0.701 | 0.548 | 0.740 | 0.699 |
| DT  | 71 | 0.843 | 0.659 | 0.674 | 0.778 | 0.694 | 0.536 | 0.738 | 0.691 |
| DT  | 72 | 0.880 | 0.692 | 0.690 | 0.728 | 0.711 | 0.563 | 0.747 | 0.709 |
| DT  | 73 | 0.850 | 0.633 | 0.630 | 0.740 | 0.662 | 0.489 | 0.713 | 0.659 |
| KNN | 1  | 0.797 | 0.550 | 0.522 | 0.318 | 0.522 | 0.315 | 0.547 | 0.533 |
| KNN | 2  | 0.841 | 0.577 | 0.578 | 0.565 | 0.598 | 0.414 | 0.640 | 0.596 |

|     |    |       |       |       |       |       |       |       |       |
|-----|----|-------|-------|-------|-------|-------|-------|-------|-------|
| KNN | 3  | 0.870 | 0.618 | 0.596 | 0.700 | 0.641 | 0.466 | 0.696 | 0.636 |
| KNN | 4  | 0.896 | 0.673 | 0.653 | 0.759 | 0.695 | 0.546 | 0.745 | 0.690 |
| KNN | 5  | 0.884 | 0.684 | 0.659 | 0.758 | 0.701 | 0.557 | 0.746 | 0.696 |
| KNN | 6  | 0.876 | 0.667 | 0.643 | 0.786 | 0.690 | 0.539 | 0.743 | 0.685 |
| KNN | 7  | 0.876 | 0.684 | 0.639 | 0.756 | 0.692 | 0.545 | 0.739 | 0.686 |
| KNN | 8  | 0.891 | 0.686 | 0.643 | 0.765 | 0.696 | 0.549 | 0.746 | 0.691 |
| KNN | 9  | 0.923 | 0.701 | 0.651 | 0.762 | 0.707 | 0.564 | 0.759 | 0.703 |
| KNN | 10 | 0.933 | 0.706 | 0.653 | 0.794 | 0.715 | 0.578 | 0.772 | 0.709 |
| KNN | 11 | 0.924 | 0.697 | 0.650 | 0.795 | 0.709 | 0.564 | 0.766 | 0.704 |
| KNN | 12 | 0.941 | 0.724 | 0.687 | 0.825 | 0.739 | 0.607 | 0.794 | 0.735 |
| KNN | 13 | 0.916 | 0.708 | 0.680 | 0.830 | 0.728 | 0.591 | 0.784 | 0.724 |
| KNN | 14 | 0.912 | 0.701 | 0.680 | 0.833 | 0.726 | 0.590 | 0.782 | 0.722 |
| KNN | 15 | 0.932 | 0.708 | 0.681 | 0.829 | 0.730 | 0.594 | 0.787 | 0.726 |
| KNN | 16 | 0.900 | 0.705 | 0.682 | 0.808 | 0.725 | 0.588 | 0.774 | 0.720 |
| KNN | 17 | 0.916 | 0.716 | 0.689 | 0.843 | 0.736 | 0.603 | 0.791 | 0.732 |
| KNN | 18 | 0.920 | 0.713 | 0.691 | 0.828 | 0.735 | 0.601 | 0.788 | 0.731 |
| KNN | 19 | 0.929 | 0.719 | 0.687 | 0.846 | 0.739 | 0.607 | 0.795 | 0.734 |
| KNN | 20 | 0.937 | 0.715 | 0.700 | 0.844 | 0.742 | 0.611 | 0.799 | 0.739 |
| KNN | 21 | 0.911 | 0.705 | 0.695 | 0.858 | 0.736 | 0.601 | 0.792 | 0.732 |
| KNN | 22 | 0.900 | 0.692 | 0.686 | 0.843 | 0.725 | 0.585 | 0.780 | 0.721 |
| KNN | 23 | 0.907 | 0.706 | 0.692 | 0.862 | 0.735 | 0.599 | 0.792 | 0.731 |
| KNN | 24 | 0.916 | 0.713 | 0.702 | 0.854 | 0.741 | 0.609 | 0.796 | 0.738 |
| KNN | 25 | 0.929 | 0.717 | 0.689 | 0.870 | 0.741 | 0.612 | 0.801 | 0.737 |
| KNN | 26 | 0.933 | 0.712 | 0.686 | 0.855 | 0.736 | 0.603 | 0.796 | 0.732 |
| KNN | 27 | 0.929 | 0.719 | 0.697 | 0.847 | 0.742 | 0.611 | 0.798 | 0.739 |

|     |    |       |       |       |       |       |       |       |       |
|-----|----|-------|-------|-------|-------|-------|-------|-------|-------|
| KNN | 28 | 0.920 | 0.694 | 0.676 | 0.853 | 0.724 | 0.583 | 0.786 | 0.720 |
| KNN | 29 | 0.907 | 0.710 | 0.690 | 0.860 | 0.736 | 0.602 | 0.792 | 0.731 |
| KNN | 30 | 0.916 | 0.691 | 0.665 | 0.852 | 0.718 | 0.576 | 0.781 | 0.713 |
| KNN | 31 | 0.924 | 0.710 | 0.679 | 0.838 | 0.731 | 0.595 | 0.788 | 0.726 |
| KNN | 32 | 0.908 | 0.705 | 0.672 | 0.849 | 0.726 | 0.590 | 0.784 | 0.721 |
| KNN | 33 | 0.881 | 0.703 | 0.674 | 0.855 | 0.725 | 0.589 | 0.778 | 0.719 |
| KNN | 34 | 0.916 | 0.700 | 0.678 | 0.843 | 0.726 | 0.589 | 0.784 | 0.722 |
| KNN | 35 | 0.900 | 0.706 | 0.678 | 0.844 | 0.728 | 0.592 | 0.782 | 0.723 |
| KNN | 36 | 0.897 | 0.699 | 0.673 | 0.847 | 0.723 | 0.586 | 0.779 | 0.718 |
| KNN | 37 | 0.904 | 0.707 | 0.667 | 0.836 | 0.723 | 0.587 | 0.779 | 0.718 |
| KNN | 38 | 0.912 | 0.706 | 0.672 | 0.836 | 0.725 | 0.589 | 0.782 | 0.720 |
| KNN | 39 | 0.889 | 0.689 | 0.662 | 0.857 | 0.715 | 0.573 | 0.774 | 0.710 |
| KNN | 40 | 0.904 | 0.695 | 0.664 | 0.859 | 0.720 | 0.580 | 0.780 | 0.714 |
| KNN | 41 | 0.904 | 0.696 | 0.657 | 0.863 | 0.717 | 0.577 | 0.780 | 0.712 |
| KNN | 42 | 0.884 | 0.693 | 0.656 | 0.816 | 0.709 | 0.566 | 0.762 | 0.704 |
| KNN | 43 | 0.889 | 0.706 | 0.671 | 0.828 | 0.723 | 0.586 | 0.774 | 0.717 |
| KNN | 44 | 0.874 | 0.705 | 0.678 | 0.835 | 0.725 | 0.590 | 0.773 | 0.720 |
| KNN | 45 | 0.900 | 0.710 | 0.682 | 0.839 | 0.730 | 0.594 | 0.783 | 0.726 |
| KNN | 46 | 0.924 | 0.713 | 0.689 | 0.840 | 0.736 | 0.602 | 0.792 | 0.732 |
| KNN | 47 | 0.912 | 0.713 | 0.686 | 0.841 | 0.734 | 0.602 | 0.788 | 0.730 |
| KNN | 48 | 0.904 | 0.720 | 0.690 | 0.841 | 0.738 | 0.607 | 0.789 | 0.733 |
| KNN | 49 | 0.908 | 0.722 | 0.697 | 0.840 | 0.741 | 0.613 | 0.792 | 0.737 |
| KNN | 50 | 0.920 | 0.708 | 0.682 | 0.840 | 0.731 | 0.595 | 0.788 | 0.726 |
| KNN | 51 | 0.924 | 0.685 | 0.657 | 0.815 | 0.709 | 0.565 | 0.770 | 0.704 |
| KNN | 52 | 0.920 | 0.693 | 0.655 | 0.829 | 0.713 | 0.571 | 0.774 | 0.708 |

|     |    |       |       |       |       |       |       |       |       |
|-----|----|-------|-------|-------|-------|-------|-------|-------|-------|
| KNN | 53 | 0.912 | 0.684 | 0.656 | 0.832 | 0.710 | 0.567 | 0.771 | 0.705 |
| KNN | 54 | 0.904 | 0.681 | 0.646 | 0.819 | 0.703 | 0.557 | 0.763 | 0.697 |
| KNN | 55 | 0.912 | 0.692 | 0.660 | 0.811 | 0.712 | 0.572 | 0.769 | 0.707 |
| KNN | 56 | 0.929 | 0.690 | 0.653 | 0.820 | 0.711 | 0.567 | 0.773 | 0.706 |
| KNN | 57 | 0.920 | 0.699 | 0.656 | 0.806 | 0.713 | 0.572 | 0.770 | 0.708 |
| KNN | 58 | 0.904 | 0.701 | 0.663 | 0.823 | 0.718 | 0.580 | 0.773 | 0.713 |
| KNN | 59 | 0.920 | 0.699 | 0.653 | 0.811 | 0.713 | 0.573 | 0.771 | 0.707 |
| KNN | 60 | 0.912 | 0.698 | 0.655 | 0.819 | 0.714 | 0.574 | 0.771 | 0.708 |
| KNN | 61 | 0.904 | 0.691 | 0.652 | 0.815 | 0.709 | 0.567 | 0.765 | 0.703 |
| KNN | 62 | 0.904 | 0.690 | 0.653 | 0.819 | 0.709 | 0.565 | 0.766 | 0.703 |
| KNN | 63 | 0.920 | 0.690 | 0.654 | 0.802 | 0.709 | 0.564 | 0.767 | 0.704 |
| KNN | 64 | 0.900 | 0.694 | 0.664 | 0.822 | 0.715 | 0.575 | 0.770 | 0.710 |
| KNN | 65 | 0.904 | 0.687 | 0.656 | 0.817 | 0.709 | 0.565 | 0.766 | 0.703 |
| KNN | 66 | 0.916 | 0.695 | 0.661 | 0.813 | 0.714 | 0.572 | 0.771 | 0.709 |
| KNN | 67 | 0.912 | 0.686 | 0.653 | 0.786 | 0.704 | 0.559 | 0.759 | 0.699 |
| KNN | 68 | 0.937 | 0.690 | 0.661 | 0.807 | 0.713 | 0.570 | 0.774 | 0.708 |
| KNN | 69 | 0.920 | 0.696 | 0.668 | 0.818 | 0.718 | 0.579 | 0.775 | 0.713 |
| KNN | 70 | 0.933 | 0.697 | 0.666 | 0.806 | 0.717 | 0.577 | 0.775 | 0.713 |
| KNN | 71 | 0.929 | 0.677 | 0.650 | 0.805 | 0.703 | 0.556 | 0.765 | 0.698 |
| KNN | 72 | 0.920 | 0.683 | 0.663 | 0.793 | 0.708 | 0.562 | 0.765 | 0.704 |
| KNN | 73 | 0.924 | 0.694 | 0.662 | 0.799 | 0.713 | 0.571 | 0.770 | 0.708 |
| RF  | 1  | 0.762 | 0.540 | 0.511 | 0.341 | 0.518 | 0.308 | 0.539 | 0.524 |
| RF  | 2  | 0.846 | 0.594 | 0.573 | 0.482 | 0.591 | 0.405 | 0.624 | 0.592 |
| RF  | 3  | 0.862 | 0.641 | 0.587 | 0.659 | 0.642 | 0.472 | 0.688 | 0.637 |
| RF  | 4  | 0.882 | 0.665 | 0.601 | 0.648 | 0.656 | 0.492 | 0.699 | 0.652 |

|    |    |       |       |       |       |       |       |       |       |
|----|----|-------|-------|-------|-------|-------|-------|-------|-------|
| RF | 5  | 0.878 | 0.686 | 0.611 | 0.670 | 0.672 | 0.516 | 0.711 | 0.666 |
| RF | 6  | 0.874 | 0.697 | 0.626 | 0.708 | 0.686 | 0.538 | 0.726 | 0.681 |
| RF | 7  | 0.874 | 0.708 | 0.630 | 0.717 | 0.693 | 0.547 | 0.732 | 0.688 |
| RF | 8  | 0.912 | 0.713 | 0.643 | 0.735 | 0.705 | 0.564 | 0.750 | 0.700 |
| RF | 9  | 0.919 | 0.721 | 0.640 | 0.751 | 0.710 | 0.572 | 0.758 | 0.704 |
| RF | 10 | 0.912 | 0.733 | 0.659 | 0.774 | 0.725 | 0.595 | 0.769 | 0.719 |
| RF | 11 | 0.924 | 0.734 | 0.661 | 0.778 | 0.728 | 0.599 | 0.774 | 0.721 |
| RF | 12 | 0.915 | 0.736 | 0.663 | 0.812 | 0.733 | 0.609 | 0.781 | 0.726 |
| RF | 13 | 0.911 | 0.743 | 0.665 | 0.811 | 0.736 | 0.616 | 0.782 | 0.729 |
| RF | 14 | 0.912 | 0.747 | 0.675 | 0.794 | 0.740 | 0.622 | 0.782 | 0.733 |
| RF | 15 | 0.920 | 0.744 | 0.674 | 0.821 | 0.741 | 0.620 | 0.790 | 0.735 |
| RF | 16 | 0.912 | 0.760 | 0.684 | 0.836 | 0.754 | 0.642 | 0.798 | 0.746 |
| RF | 17 | 0.912 | 0.751 | 0.667 | 0.835 | 0.744 | 0.628 | 0.791 | 0.735 |
| RF | 18 | 0.920 | 0.756 | 0.670 | 0.847 | 0.749 | 0.639 | 0.798 | 0.741 |
| RF | 19 | 0.912 | 0.748 | 0.668 | 0.840 | 0.744 | 0.628 | 0.792 | 0.735 |
| RF | 20 | 0.916 | 0.755 | 0.675 | 0.840 | 0.749 | 0.637 | 0.797 | 0.741 |
| RF | 21 | 0.912 | 0.761 | 0.667 | 0.832 | 0.749 | 0.639 | 0.793 | 0.739 |
| RF | 22 | 0.912 | 0.750 | 0.656 | 0.829 | 0.739 | 0.625 | 0.787 | 0.730 |
| RF | 23 | 0.916 | 0.765 | 0.679 | 0.843 | 0.756 | 0.649 | 0.801 | 0.747 |
| RF | 24 | 0.916 | 0.751 | 0.665 | 0.841 | 0.744 | 0.630 | 0.793 | 0.736 |
| RF | 25 | 0.912 | 0.759 | 0.670 | 0.843 | 0.750 | 0.642 | 0.796 | 0.741 |
| RF | 26 | 0.908 | 0.749 | 0.661 | 0.844 | 0.742 | 0.628 | 0.791 | 0.733 |
| RF | 27 | 0.912 | 0.748 | 0.652 | 0.841 | 0.739 | 0.624 | 0.788 | 0.728 |
| RF | 28 | 0.916 | 0.756 | 0.669 | 0.844 | 0.749 | 0.638 | 0.797 | 0.740 |
| RF | 29 | 0.912 | 0.748 | 0.654 | 0.828 | 0.738 | 0.622 | 0.786 | 0.728 |

|    |    |       |       |       |       |       |       |       |       |
|----|----|-------|-------|-------|-------|-------|-------|-------|-------|
| RF | 30 | 0.920 | 0.746 | 0.658 | 0.848 | 0.741 | 0.626 | 0.793 | 0.731 |
| RF | 31 | 0.920 | 0.753 | 0.661 | 0.841 | 0.744 | 0.632 | 0.794 | 0.735 |
| RF | 32 | 0.912 | 0.755 | 0.666 | 0.827 | 0.744 | 0.631 | 0.790 | 0.736 |
| RF | 33 | 0.916 | 0.753 | 0.657 | 0.834 | 0.742 | 0.630 | 0.790 | 0.732 |
| RF | 34 | 0.920 | 0.753 | 0.660 | 0.840 | 0.744 | 0.630 | 0.793 | 0.734 |
| RF | 35 | 0.920 | 0.754 | 0.660 | 0.834 | 0.744 | 0.630 | 0.792 | 0.734 |
| RF | 36 | 0.916 | 0.760 | 0.664 | 0.839 | 0.748 | 0.639 | 0.795 | 0.738 |
| RF | 37 | 0.920 | 0.751 | 0.653 | 0.828 | 0.739 | 0.625 | 0.788 | 0.729 |
| RF | 38 | 0.916 | 0.762 | 0.667 | 0.833 | 0.749 | 0.641 | 0.795 | 0.740 |
| RF | 39 | 0.916 | 0.748 | 0.652 | 0.829 | 0.737 | 0.621 | 0.786 | 0.727 |
| RF | 40 | 0.920 | 0.750 | 0.653 | 0.834 | 0.739 | 0.625 | 0.789 | 0.729 |
| RF | 41 | 0.912 | 0.752 | 0.652 | 0.830 | 0.739 | 0.626 | 0.787 | 0.729 |
| RF | 42 | 0.924 | 0.757 | 0.661 | 0.837 | 0.746 | 0.635 | 0.795 | 0.736 |
| RF | 43 | 0.916 | 0.762 | 0.662 | 0.842 | 0.749 | 0.641 | 0.796 | 0.738 |
| RF | 44 | 0.912 | 0.759 | 0.669 | 0.852 | 0.750 | 0.640 | 0.798 | 0.741 |
| RF | 45 | 0.916 | 0.760 | 0.659 | 0.852 | 0.748 | 0.640 | 0.797 | 0.738 |
| RF | 46 | 0.916 | 0.752 | 0.646 | 0.844 | 0.739 | 0.628 | 0.790 | 0.728 |
| RF | 47 | 0.920 | 0.748 | 0.645 | 0.830 | 0.736 | 0.621 | 0.786 | 0.725 |
| RF | 48 | 0.924 | 0.759 | 0.656 | 0.839 | 0.746 | 0.638 | 0.795 | 0.735 |
| RF | 49 | 0.916 | 0.757 | 0.655 | 0.844 | 0.744 | 0.635 | 0.793 | 0.734 |
| RF | 50 | 0.908 | 0.749 | 0.643 | 0.836 | 0.736 | 0.622 | 0.784 | 0.724 |
| RF | 51 | 0.924 | 0.752 | 0.649 | 0.836 | 0.740 | 0.628 | 0.791 | 0.729 |
| RF | 52 | 0.916 | 0.752 | 0.636 | 0.836 | 0.736 | 0.625 | 0.785 | 0.723 |
| RF | 53 | 0.929 | 0.762 | 0.662 | 0.839 | 0.749 | 0.643 | 0.798 | 0.739 |
| RF | 54 | 0.916 | 0.744 | 0.640 | 0.833 | 0.732 | 0.614 | 0.783 | 0.721 |



|     |    |       |       |       |       |       |       |       |       |
|-----|----|-------|-------|-------|-------|-------|-------|-------|-------|
| RF  | 55 | 0.924 | 0.745 | 0.641 | 0.830 | 0.733 | 0.617 | 0.785 | 0.723 |
| RF  | 56 | 0.916 | 0.765 | 0.658 | 0.827 | 0.747 | 0.640 | 0.792 | 0.737 |
| RF  | 57 | 0.920 | 0.757 | 0.648 | 0.824 | 0.740 | 0.628 | 0.787 | 0.729 |
| RF  | 58 | 0.912 | 0.748 | 0.636 | 0.839 | 0.733 | 0.620 | 0.784 | 0.721 |
| RF  | 59 | 0.916 | 0.739 | 0.629 | 0.839 | 0.727 | 0.609 | 0.781 | 0.715 |
| RF  | 60 | 0.904 | 0.748 | 0.632 | 0.834 | 0.731 | 0.619 | 0.779 | 0.718 |
| RF  | 61 | 0.916 | 0.749 | 0.640 | 0.833 | 0.734 | 0.619 | 0.784 | 0.723 |
| RF  | 62 | 0.924 | 0.743 | 0.635 | 0.843 | 0.732 | 0.617 | 0.786 | 0.720 |
| RF  | 63 | 0.912 | 0.751 | 0.636 | 0.834 | 0.734 | 0.622 | 0.783 | 0.722 |
| RF  | 64 | 0.912 | 0.741 | 0.631 | 0.834 | 0.728 | 0.610 | 0.779 | 0.716 |
| RF  | 65 | 0.904 | 0.750 | 0.637 | 0.828 | 0.733 | 0.619 | 0.780 | 0.721 |
| RF  | 66 | 0.912 | 0.751 | 0.647 | 0.823 | 0.736 | 0.622 | 0.783 | 0.726 |
| RF  | 67 | 0.920 | 0.753 | 0.643 | 0.833 | 0.738 | 0.627 | 0.787 | 0.726 |
| RF  | 68 | 0.916 | 0.750 | 0.648 | 0.834 | 0.738 | 0.624 | 0.787 | 0.727 |
| RF  | 69 | 0.920 | 0.742 | 0.635 | 0.833 | 0.730 | 0.612 | 0.783 | 0.719 |
| RF  | 70 | 0.912 | 0.755 | 0.651 | 0.847 | 0.742 | 0.632 | 0.791 | 0.731 |
| RF  | 71 | 0.912 | 0.745 | 0.648 | 0.843 | 0.736 | 0.619 | 0.787 | 0.725 |
| RF  | 72 | 0.912 | 0.749 | 0.634 | 0.830 | 0.732 | 0.618 | 0.781 | 0.720 |
| RF  | 73 | 0.908 | 0.744 | 0.629 | 0.834 | 0.728 | 0.613 | 0.779 | 0.716 |
| SVM | 1  | 0.872 | 0.676 | 0.517 | 0.326 | 0.588 | 0.405 | 0.598 | 0.586 |
| SVM | 2  | 0.827 | 0.660 | 0.531 | 0.425 | 0.600 | 0.429 | 0.611 | 0.593 |
| SVM | 3  | 0.832 | 0.701 | 0.549 | 0.583 | 0.645 | 0.495 | 0.666 | 0.633 |
| SVM | 4  | 0.872 | 0.714 | 0.594 | 0.615 | 0.672 | 0.532 | 0.699 | 0.664 |
| SVM | 5  | 0.872 | 0.709 | 0.572 | 0.615 | 0.663 | 0.518 | 0.692 | 0.653 |
| SVM | 6  | 0.868 | 0.710 | 0.575 | 0.670 | 0.672 | 0.530 | 0.706 | 0.660 |

|     |    |       |       |       |       |       |       |       |       |
|-----|----|-------|-------|-------|-------|-------|-------|-------|-------|
| SVM | 7  | 0.857 | 0.736 | 0.640 | 0.716 | 0.709 | 0.578 | 0.737 | 0.702 |
| SVM | 8  | 0.872 | 0.734 | 0.639 | 0.718 | 0.709 | 0.577 | 0.741 | 0.702 |
| SVM | 9  | 0.891 | 0.735 | 0.620 | 0.716 | 0.704 | 0.568 | 0.740 | 0.695 |
| SVM | 10 | 0.877 | 0.741 | 0.670 | 0.793 | 0.732 | 0.606 | 0.770 | 0.726 |
| SVM | 11 | 0.880 | 0.755 | 0.692 | 0.834 | 0.752 | 0.637 | 0.790 | 0.745 |
| SVM | 12 | 0.874 | 0.747 | 0.696 | 0.854 | 0.751 | 0.633 | 0.793 | 0.746 |
| SVM | 13 | 0.885 | 0.746 | 0.702 | 0.852 | 0.753 | 0.635 | 0.796 | 0.748 |
| SVM | 14 | 0.880 | 0.743 | 0.697 | 0.859 | 0.750 | 0.631 | 0.795 | 0.745 |
| SVM | 15 | 0.884 | 0.750 | 0.705 | 0.841 | 0.755 | 0.636 | 0.795 | 0.750 |
| SVM | 16 | 0.892 | 0.745 | 0.708 | 0.855 | 0.756 | 0.638 | 0.800 | 0.752 |
| SVM | 17 | 0.900 | 0.742 | 0.700 | 0.843 | 0.751 | 0.630 | 0.796 | 0.746 |
| SVM | 18 | 0.897 | 0.744 | 0.706 | 0.849 | 0.755 | 0.636 | 0.799 | 0.750 |
| SVM | 19 | 0.893 | 0.739 | 0.698 | 0.852 | 0.749 | 0.629 | 0.795 | 0.745 |
| SVM | 20 | 0.893 | 0.736 | 0.710 | 0.856 | 0.753 | 0.631 | 0.799 | 0.749 |
| SVM | 21 | 0.873 | 0.726 | 0.695 | 0.843 | 0.741 | 0.614 | 0.784 | 0.736 |
| SVM | 22 | 0.873 | 0.728 | 0.700 | 0.846 | 0.744 | 0.618 | 0.787 | 0.739 |
| SVM | 23 | 0.880 | 0.733 | 0.706 | 0.851 | 0.749 | 0.625 | 0.793 | 0.745 |
| SVM | 24 | 0.880 | 0.726 | 0.698 | 0.836 | 0.741 | 0.612 | 0.785 | 0.737 |
| SVM | 25 | 0.889 | 0.745 | 0.718 | 0.839 | 0.757 | 0.637 | 0.798 | 0.754 |
| SVM | 26 | 0.889 | 0.739 | 0.711 | 0.839 | 0.752 | 0.630 | 0.794 | 0.748 |
| SVM | 27 | 0.885 | 0.719 | 0.705 | 0.851 | 0.743 | 0.613 | 0.790 | 0.739 |
| SVM | 28 | 0.885 | 0.715 | 0.699 | 0.843 | 0.738 | 0.606 | 0.785 | 0.734 |
| SVM | 29 | 0.881 | 0.731 | 0.708 | 0.848 | 0.749 | 0.624 | 0.792 | 0.745 |
| SVM | 30 | 0.889 | 0.722 | 0.701 | 0.861 | 0.744 | 0.615 | 0.793 | 0.740 |
| SVM | 31 | 0.889 | 0.732 | 0.705 | 0.851 | 0.748 | 0.622 | 0.794 | 0.744 |

|     |    |       |       |       |       |       |       |       |       |
|-----|----|-------|-------|-------|-------|-------|-------|-------|-------|
| SVM | 32 | 0.878 | 0.731 | 0.702 | 0.843 | 0.745 | 0.619 | 0.788 | 0.741 |
| SVM | 33 | 0.897 | 0.742 | 0.719 | 0.858 | 0.759 | 0.637 | 0.804 | 0.756 |
| SVM | 34 | 0.893 | 0.740 | 0.717 | 0.855 | 0.757 | 0.634 | 0.801 | 0.753 |
| SVM | 35 | 0.897 | 0.743 | 0.717 | 0.853 | 0.758 | 0.637 | 0.802 | 0.755 |
| SVM | 36 | 0.897 | 0.742 | 0.713 | 0.853 | 0.756 | 0.633 | 0.801 | 0.752 |
| SVM | 37 | 0.897 | 0.747 | 0.730 | 0.859 | 0.765 | 0.647 | 0.808 | 0.762 |
| SVM | 38 | 0.900 | 0.743 | 0.724 | 0.856 | 0.762 | 0.641 | 0.806 | 0.759 |
| SVM | 39 | 0.904 | 0.742 | 0.718 | 0.847 | 0.758 | 0.637 | 0.803 | 0.755 |
| SVM | 40 | 0.904 | 0.742 | 0.718 | 0.847 | 0.758 | 0.637 | 0.803 | 0.755 |
| SVM | 41 | 0.897 | 0.750 | 0.732 | 0.864 | 0.768 | 0.652 | 0.811 | 0.765 |
| SVM | 42 | 0.904 | 0.735 | 0.718 | 0.853 | 0.756 | 0.633 | 0.803 | 0.753 |
| SVM | 43 | 0.904 | 0.734 | 0.716 | 0.855 | 0.755 | 0.632 | 0.803 | 0.752 |
| SVM | 44 | 0.885 | 0.730 | 0.712 | 0.863 | 0.752 | 0.628 | 0.797 | 0.748 |
| SVM | 45 | 0.897 | 0.725 | 0.708 | 0.857 | 0.748 | 0.621 | 0.797 | 0.744 |
| SVM | 46 | 0.900 | 0.714 | 0.701 | 0.868 | 0.742 | 0.612 | 0.796 | 0.738 |
| SVM | 47 | 0.912 | 0.716 | 0.711 | 0.876 | 0.749 | 0.620 | 0.804 | 0.745 |
| SVM | 48 | 0.908 | 0.707 | 0.704 | 0.877 | 0.742 | 0.610 | 0.799 | 0.738 |
| SVM | 49 | 0.912 | 0.704 | 0.699 | 0.871 | 0.739 | 0.605 | 0.797 | 0.735 |
| SVM | 50 | 0.916 | 0.714 | 0.711 | 0.865 | 0.747 | 0.618 | 0.802 | 0.744 |
| SVM | 51 | 0.916 | 0.696 | 0.693 | 0.868 | 0.733 | 0.595 | 0.793 | 0.729 |
| SVM | 52 | 0.908 | 0.711 | 0.701 | 0.863 | 0.741 | 0.608 | 0.796 | 0.737 |
| SVM | 53 | 0.912 | 0.711 | 0.704 | 0.860 | 0.742 | 0.610 | 0.797 | 0.739 |
| SVM | 54 | 0.908 | 0.714 | 0.703 | 0.863 | 0.743 | 0.611 | 0.797 | 0.739 |
| SVM | 55 | 0.908 | 0.705 | 0.697 | 0.854 | 0.736 | 0.600 | 0.791 | 0.732 |
| SVM | 56 | 0.912 | 0.701 | 0.694 | 0.852 | 0.733 | 0.597 | 0.790 | 0.730 |

|     |    |       |       |       |       |       |       |       |       |
|-----|----|-------|-------|-------|-------|-------|-------|-------|-------|
| SVM | 57 | 0.912 | 0.703 | 0.693 | 0.852 | 0.733 | 0.597 | 0.790 | 0.730 |
| SVM | 58 | 0.912 | 0.707 | 0.694 | 0.848 | 0.735 | 0.599 | 0.790 | 0.731 |
| SVM | 59 | 0.916 | 0.702 | 0.687 | 0.853 | 0.731 | 0.594 | 0.790 | 0.727 |
| SVM | 60 | 0.916 | 0.706 | 0.690 | 0.855 | 0.734 | 0.599 | 0.792 | 0.730 |
| SVM | 61 | 0.916 | 0.704 | 0.690 | 0.855 | 0.733 | 0.598 | 0.791 | 0.730 |
| SVM | 62 | 0.916 | 0.701 | 0.691 | 0.856 | 0.733 | 0.597 | 0.791 | 0.729 |
| SVM | 63 | 0.916 | 0.703 | 0.692 | 0.856 | 0.734 | 0.599 | 0.792 | 0.730 |
| SVM | 64 | 0.912 | 0.700 | 0.684 | 0.851 | 0.729 | 0.592 | 0.787 | 0.725 |
| SVM | 65 | 0.912 | 0.703 | 0.685 | 0.851 | 0.731 | 0.594 | 0.788 | 0.726 |
| SVM | 66 | 0.912 | 0.696 | 0.687 | 0.842 | 0.728 | 0.589 | 0.784 | 0.724 |
| SVM | 67 | 0.916 | 0.697 | 0.687 | 0.845 | 0.728 | 0.590 | 0.786 | 0.724 |
| SVM | 68 | 0.920 | 0.699 | 0.686 | 0.843 | 0.729 | 0.591 | 0.787 | 0.725 |
| SVM | 69 | 0.924 | 0.692 | 0.682 | 0.850 | 0.725 | 0.585 | 0.787 | 0.722 |
| SVM | 70 | 0.924 | 0.695 | 0.684 | 0.853 | 0.728 | 0.588 | 0.789 | 0.724 |
| SVM | 71 | 0.924 | 0.695 | 0.685 | 0.856 | 0.728 | 0.589 | 0.790 | 0.724 |
| SVM | 72 | 0.924 | 0.699 | 0.688 | 0.856 | 0.731 | 0.594 | 0.792 | 0.727 |
| SVM | 73 | 0.924 | 0.707 | 0.694 | 0.859 | 0.737 | 0.603 | 0.796 | 0.733 |

(4) IFS results on the mRMR feature list

| Classification algorithms | Number of features | unvaccinated healthcare workers | healthcare workers within 60 days after vaccination | healthcare workers 60–180 days after vaccination | healthcare workers over 180 days after vaccination | ACC   | MCC   | Macro F1 | Weighted F1 |
|---------------------------|--------------------|---------------------------------|-----------------------------------------------------|--------------------------------------------------|----------------------------------------------------|-------|-------|----------|-------------|
| DT                        | 1                  | 0.797                           | 0.484                                               | 0.480                                            | 0.331                                              | 0.483 | 0.259 | 0.523    | 0.490       |
| DT                        | 2                  | 0.833                           | 0.576                                               | 0.545                                            | 0.478                                              | 0.571 | 0.369 | 0.608    | 0.572       |
| DT                        | 3                  | 0.860                           | 0.586                                               | 0.565                                            | 0.568                                              | 0.597 | 0.400 | 0.645    | 0.596       |

|    |    |       |       |       |       |       |       |       |       |
|----|----|-------|-------|-------|-------|-------|-------|-------|-------|
| DT | 4  | 0.836 | 0.637 | 0.612 | 0.601 | 0.638 | 0.467 | 0.671 | 0.637 |
| DT | 5  | 0.910 | 0.646 | 0.625 | 0.643 | 0.658 | 0.491 | 0.706 | 0.657 |
| DT | 6  | 0.882 | 0.667 | 0.661 | 0.699 | 0.686 | 0.526 | 0.727 | 0.684 |
| DT | 7  | 0.880 | 0.645 | 0.641 | 0.707 | 0.670 | 0.503 | 0.718 | 0.667 |
| DT | 8  | 0.846 | 0.659 | 0.667 | 0.741 | 0.688 | 0.527 | 0.728 | 0.685 |
| DT | 9  | 0.876 | 0.686 | 0.675 | 0.742 | 0.704 | 0.552 | 0.745 | 0.701 |
| DT | 10 | 0.851 | 0.669 | 0.644 | 0.720 | 0.680 | 0.523 | 0.721 | 0.677 |
| DT | 11 | 0.798 | 0.671 | 0.668 | 0.747 | 0.690 | 0.537 | 0.721 | 0.687 |
| DT | 12 | 0.870 | 0.701 | 0.686 | 0.744 | 0.714 | 0.567 | 0.750 | 0.712 |
| DT | 13 | 0.869 | 0.673 | 0.685 | 0.802 | 0.709 | 0.561 | 0.757 | 0.706 |
| DT | 14 | 0.882 | 0.725 | 0.699 | 0.745 | 0.730 | 0.594 | 0.763 | 0.728 |
| DT | 15 | 0.850 | 0.663 | 0.656 | 0.714 | 0.682 | 0.521 | 0.721 | 0.679 |
| DT | 16 | 0.879 | 0.678 | 0.684 | 0.727 | 0.703 | 0.551 | 0.742 | 0.701 |
| DT | 17 | 0.839 | 0.689 | 0.668 | 0.729 | 0.698 | 0.545 | 0.732 | 0.696 |
| DT | 18 | 0.835 | 0.694 | 0.683 | 0.768 | 0.710 | 0.564 | 0.745 | 0.707 |
| DT | 19 | 0.815 | 0.689 | 0.699 | 0.767 | 0.713 | 0.567 | 0.743 | 0.711 |
| DT | 20 | 0.884 | 0.695 | 0.687 | 0.784 | 0.717 | 0.572 | 0.762 | 0.715 |
| DT | 21 | 0.869 | 0.679 | 0.686 | 0.741 | 0.704 | 0.551 | 0.744 | 0.703 |
| DT | 22 | 0.851 | 0.706 | 0.693 | 0.757 | 0.718 | 0.573 | 0.752 | 0.716 |
| DT | 23 | 0.882 | 0.686 | 0.689 | 0.750 | 0.710 | 0.558 | 0.752 | 0.709 |
| DT | 24 | 0.894 | 0.687 | 0.679 | 0.754 | 0.708 | 0.556 | 0.754 | 0.706 |
| DT | 25 | 0.886 | 0.691 | 0.690 | 0.770 | 0.715 | 0.565 | 0.759 | 0.714 |
| DT | 26 | 0.906 | 0.681 | 0.686 | 0.755 | 0.710 | 0.561 | 0.757 | 0.708 |
| DT | 27 | 0.872 | 0.676 | 0.666 | 0.769 | 0.699 | 0.546 | 0.746 | 0.696 |
| DT | 28 | 0.838 | 0.674 | 0.677 | 0.763 | 0.699 | 0.544 | 0.738 | 0.697 |

|    |    |       |       |       |       |       |       |       |       |
|----|----|-------|-------|-------|-------|-------|-------|-------|-------|
| DT | 29 | 0.878 | 0.682 | 0.687 | 0.758 | 0.709 | 0.558 | 0.751 | 0.707 |
| DT | 30 | 0.850 | 0.675 | 0.668 | 0.738 | 0.694 | 0.538 | 0.733 | 0.692 |
| DT | 31 | 0.874 | 0.656 | 0.661 | 0.782 | 0.691 | 0.533 | 0.743 | 0.688 |
| DT | 32 | 0.912 | 0.688 | 0.677 | 0.745 | 0.708 | 0.557 | 0.756 | 0.706 |
| DT | 33 | 0.888 | 0.687 | 0.685 | 0.781 | 0.713 | 0.564 | 0.760 | 0.711 |
| DT | 34 | 0.889 | 0.682 | 0.674 | 0.760 | 0.705 | 0.553 | 0.751 | 0.703 |
| DT | 35 | 0.856 | 0.666 | 0.665 | 0.764 | 0.693 | 0.534 | 0.738 | 0.690 |
| DT | 36 | 0.876 | 0.685 | 0.686 | 0.778 | 0.712 | 0.561 | 0.756 | 0.709 |
| DT | 37 | 0.861 | 0.625 | 0.639 | 0.747 | 0.664 | 0.491 | 0.718 | 0.661 |
| DT | 38 | 0.882 | 0.692 | 0.673 | 0.767 | 0.709 | 0.560 | 0.754 | 0.706 |
| DT | 39 | 0.887 | 0.688 | 0.656 | 0.708 | 0.693 | 0.539 | 0.735 | 0.691 |
| DT | 40 | 0.870 | 0.691 | 0.670 | 0.752 | 0.704 | 0.554 | 0.746 | 0.702 |
| DT | 41 | 0.872 | 0.647 | 0.668 | 0.784 | 0.690 | 0.532 | 0.743 | 0.687 |
| DT | 42 | 0.862 | 0.663 | 0.659 | 0.748 | 0.688 | 0.527 | 0.733 | 0.685 |
| DT | 43 | 0.866 | 0.678 | 0.670 | 0.718 | 0.695 | 0.538 | 0.733 | 0.693 |
| DT | 44 | 0.875 | 0.649 | 0.663 | 0.739 | 0.684 | 0.522 | 0.731 | 0.681 |
| DT | 45 | 0.868 | 0.656 | 0.652 | 0.740 | 0.682 | 0.520 | 0.729 | 0.679 |
| DT | 46 | 0.866 | 0.679 | 0.663 | 0.734 | 0.694 | 0.536 | 0.735 | 0.692 |
| DT | 47 | 0.903 | 0.681 | 0.682 | 0.780 | 0.712 | 0.564 | 0.762 | 0.708 |
| DT | 48 | 0.838 | 0.648 | 0.663 | 0.741 | 0.682 | 0.520 | 0.723 | 0.679 |
| DT | 49 | 0.860 | 0.647 | 0.646 | 0.767 | 0.678 | 0.512 | 0.730 | 0.675 |
| DT | 50 | 0.805 | 0.657 | 0.663 | 0.760 | 0.685 | 0.525 | 0.721 | 0.681 |
| DT | 51 | 0.860 | 0.678 | 0.646 | 0.718 | 0.685 | 0.525 | 0.725 | 0.682 |
| DT | 52 | 0.885 | 0.647 | 0.647 | 0.715 | 0.674 | 0.505 | 0.724 | 0.672 |
| DT | 53 | 0.852 | 0.672 | 0.650 | 0.715 | 0.683 | 0.523 | 0.722 | 0.681 |

|     |    |       |       |       |       |       |       |       |       |
|-----|----|-------|-------|-------|-------|-------|-------|-------|-------|
| DT  | 54 | 0.824 | 0.657 | 0.665 | 0.719 | 0.682 | 0.523 | 0.716 | 0.680 |
| DT  | 55 | 0.863 | 0.651 | 0.661 | 0.782 | 0.689 | 0.532 | 0.740 | 0.685 |
| DT  | 56 | 0.851 | 0.673 | 0.652 | 0.740 | 0.688 | 0.529 | 0.729 | 0.684 |
| DT  | 57 | 0.848 | 0.670 | 0.658 | 0.730 | 0.687 | 0.528 | 0.727 | 0.684 |
| DT  | 58 | 0.845 | 0.676 | 0.665 | 0.745 | 0.694 | 0.540 | 0.733 | 0.691 |
| DT  | 59 | 0.852 | 0.629 | 0.626 | 0.733 | 0.658 | 0.484 | 0.710 | 0.655 |
| DT  | 60 | 0.885 | 0.676 | 0.664 | 0.750 | 0.697 | 0.542 | 0.744 | 0.694 |
| DT  | 61 | 0.847 | 0.665 | 0.668 | 0.747 | 0.691 | 0.533 | 0.732 | 0.689 |
| DT  | 62 | 0.861 | 0.690 | 0.684 | 0.753 | 0.709 | 0.563 | 0.747 | 0.707 |
| DT  | 63 | 0.819 | 0.674 | 0.665 | 0.707 | 0.687 | 0.529 | 0.716 | 0.685 |
| DT  | 64 | 0.856 | 0.675 | 0.658 | 0.715 | 0.688 | 0.531 | 0.726 | 0.686 |
| DT  | 65 | 0.826 | 0.651 | 0.639 | 0.693 | 0.666 | 0.495 | 0.702 | 0.663 |
| DT  | 66 | 0.888 | 0.657 | 0.668 | 0.722 | 0.688 | 0.531 | 0.734 | 0.686 |
| DT  | 67 | 0.867 | 0.691 | 0.680 | 0.744 | 0.707 | 0.558 | 0.745 | 0.705 |
| DT  | 68 | 0.861 | 0.666 | 0.668 | 0.729 | 0.690 | 0.535 | 0.731 | 0.688 |
| DT  | 69 | 0.876 | 0.660 | 0.675 | 0.763 | 0.696 | 0.540 | 0.743 | 0.693 |
| DT  | 70 | 0.853 | 0.687 | 0.685 | 0.752 | 0.708 | 0.560 | 0.744 | 0.705 |
| DT  | 71 | 0.860 | 0.677 | 0.664 | 0.719 | 0.692 | 0.536 | 0.730 | 0.690 |
| DT  | 72 | 0.826 | 0.656 | 0.660 | 0.729 | 0.681 | 0.520 | 0.718 | 0.678 |
| DT  | 73 | 0.860 | 0.659 | 0.645 | 0.723 | 0.677 | 0.513 | 0.722 | 0.675 |
| KNN | 1  | 0.769 | 0.454 | 0.462 | 0.318 | 0.461 | 0.234 | 0.501 | 0.467 |
| KNN | 2  | 0.848 | 0.600 | 0.555 | 0.587 | 0.602 | 0.423 | 0.648 | 0.598 |
| KNN | 3  | 0.873 | 0.615 | 0.607 | 0.686 | 0.643 | 0.471 | 0.696 | 0.639 |
| KNN | 4  | 0.907 | 0.683 | 0.654 | 0.732 | 0.696 | 0.549 | 0.744 | 0.692 |
| KNN | 5  | 0.895 | 0.693 | 0.676 | 0.780 | 0.714 | 0.572 | 0.761 | 0.710 |

|     |    |       |       |       |       |       |       |       |       |
|-----|----|-------|-------|-------|-------|-------|-------|-------|-------|
| KNN | 6  | 0.895 | 0.699 | 0.673 | 0.788 | 0.716 | 0.575 | 0.764 | 0.712 |
| KNN | 7  | 0.900 | 0.709 | 0.676 | 0.798 | 0.723 | 0.588 | 0.771 | 0.719 |
| KNN | 8  | 0.891 | 0.694 | 0.658 | 0.806 | 0.710 | 0.568 | 0.762 | 0.705 |
| KNN | 9  | 0.900 | 0.674 | 0.655 | 0.815 | 0.703 | 0.555 | 0.761 | 0.698 |
| KNN | 10 | 0.899 | 0.699 | 0.662 | 0.804 | 0.714 | 0.573 | 0.766 | 0.709 |
| KNN | 11 | 0.911 | 0.679 | 0.640 | 0.799 | 0.698 | 0.550 | 0.757 | 0.692 |
| KNN | 12 | 0.907 | 0.681 | 0.648 | 0.788 | 0.700 | 0.552 | 0.756 | 0.695 |
| KNN | 13 | 0.892 | 0.697 | 0.673 | 0.807 | 0.717 | 0.577 | 0.767 | 0.713 |
| KNN | 14 | 0.904 | 0.708 | 0.675 | 0.780 | 0.720 | 0.583 | 0.767 | 0.716 |
| KNN | 15 | 0.916 | 0.698 | 0.668 | 0.799 | 0.716 | 0.574 | 0.770 | 0.712 |
| KNN | 16 | 0.928 | 0.714 | 0.688 | 0.817 | 0.733 | 0.600 | 0.787 | 0.730 |
| KNN | 17 | 0.920 | 0.712 | 0.673 | 0.830 | 0.728 | 0.594 | 0.784 | 0.723 |
| KNN | 18 | 0.908 | 0.719 | 0.685 | 0.817 | 0.733 | 0.602 | 0.782 | 0.729 |
| KNN | 19 | 0.920 | 0.721 | 0.689 | 0.849 | 0.739 | 0.608 | 0.794 | 0.735 |
| KNN | 20 | 0.920 | 0.717 | 0.689 | 0.862 | 0.739 | 0.608 | 0.797 | 0.735 |
| KNN | 21 | 0.920 | 0.714 | 0.685 | 0.851 | 0.736 | 0.603 | 0.793 | 0.731 |
| KNN | 22 | 0.912 | 0.714 | 0.680 | 0.844 | 0.733 | 0.600 | 0.788 | 0.728 |
| KNN | 23 | 0.912 | 0.717 | 0.686 | 0.833 | 0.735 | 0.603 | 0.787 | 0.730 |
| KNN | 24 | 0.929 | 0.723 | 0.691 | 0.844 | 0.741 | 0.612 | 0.797 | 0.737 |
| KNN | 25 | 0.924 | 0.719 | 0.682 | 0.833 | 0.735 | 0.604 | 0.790 | 0.730 |
| KNN | 26 | 0.937 | 0.714 | 0.683 | 0.845 | 0.735 | 0.601 | 0.795 | 0.731 |
| KNN | 27 | 0.924 | 0.710 | 0.675 | 0.829 | 0.728 | 0.591 | 0.785 | 0.723 |
| KNN | 28 | 0.904 | 0.715 | 0.683 | 0.846 | 0.733 | 0.601 | 0.787 | 0.729 |
| KNN | 29 | 0.924 | 0.702 | 0.676 | 0.835 | 0.726 | 0.589 | 0.785 | 0.722 |
| KNN | 30 | 0.920 | 0.713 | 0.688 | 0.846 | 0.736 | 0.603 | 0.792 | 0.731 |



|     |    |       |       |       |       |       |       |       |       |
|-----|----|-------|-------|-------|-------|-------|-------|-------|-------|
| KNN | 31 | 0.924 | 0.715 | 0.682 | 0.829 | 0.733 | 0.599 | 0.788 | 0.728 |
| KNN | 32 | 0.912 | 0.707 | 0.691 | 0.834 | 0.733 | 0.599 | 0.786 | 0.729 |
| KNN | 33 | 0.908 | 0.704 | 0.691 | 0.843 | 0.732 | 0.599 | 0.786 | 0.728 |
| KNN | 34 | 0.916 | 0.691 | 0.659 | 0.832 | 0.714 | 0.574 | 0.775 | 0.709 |
| KNN | 35 | 0.912 | 0.696 | 0.669 | 0.839 | 0.720 | 0.581 | 0.779 | 0.715 |
| KNN | 36 | 0.929 | 0.697 | 0.671 | 0.825 | 0.721 | 0.581 | 0.781 | 0.717 |
| KNN | 37 | 0.888 | 0.704 | 0.675 | 0.812 | 0.721 | 0.584 | 0.770 | 0.716 |
| KNN | 38 | 0.897 | 0.702 | 0.674 | 0.832 | 0.723 | 0.588 | 0.776 | 0.718 |
| KNN | 39 | 0.900 | 0.714 | 0.688 | 0.817 | 0.732 | 0.600 | 0.780 | 0.727 |
| KNN | 40 | 0.900 | 0.721 | 0.686 | 0.801 | 0.732 | 0.601 | 0.777 | 0.728 |
| KNN | 41 | 0.904 | 0.725 | 0.691 | 0.814 | 0.738 | 0.610 | 0.784 | 0.733 |
| KNN | 42 | 0.908 | 0.727 | 0.686 | 0.821 | 0.738 | 0.610 | 0.786 | 0.733 |
| KNN | 43 | 0.916 | 0.709 | 0.675 | 0.819 | 0.726 | 0.591 | 0.780 | 0.721 |
| KNN | 44 | 0.912 | 0.716 | 0.682 | 0.813 | 0.731 | 0.598 | 0.781 | 0.726 |
| KNN | 45 | 0.892 | 0.695 | 0.670 | 0.794 | 0.714 | 0.574 | 0.763 | 0.709 |
| KNN | 46 | 0.900 | 0.718 | 0.674 | 0.805 | 0.727 | 0.595 | 0.774 | 0.722 |
| KNN | 47 | 0.912 | 0.712 | 0.673 | 0.794 | 0.724 | 0.590 | 0.773 | 0.719 |
| KNN | 48 | 0.916 | 0.699 | 0.662 | 0.824 | 0.717 | 0.577 | 0.775 | 0.712 |
| KNN | 49 | 0.912 | 0.693 | 0.665 | 0.838 | 0.718 | 0.579 | 0.777 | 0.713 |
| KNN | 50 | 0.892 | 0.695 | 0.672 | 0.816 | 0.717 | 0.575 | 0.769 | 0.712 |
| KNN | 51 | 0.898 | 0.700 | 0.671 | 0.818 | 0.719 | 0.578 | 0.772 | 0.715 |
| KNN | 52 | 0.908 | 0.712 | 0.665 | 0.820 | 0.723 | 0.588 | 0.776 | 0.718 |
| KNN | 53 | 0.896 | 0.699 | 0.665 | 0.824 | 0.717 | 0.579 | 0.771 | 0.712 |
| KNN | 54 | 0.924 | 0.711 | 0.671 | 0.830 | 0.727 | 0.591 | 0.784 | 0.722 |
| KNN | 55 | 0.916 | 0.703 | 0.665 | 0.827 | 0.721 | 0.584 | 0.778 | 0.716 |

|     |    |       |       |       |       |       |       |       |       |
|-----|----|-------|-------|-------|-------|-------|-------|-------|-------|
| KNN | 56 | 0.924 | 0.707 | 0.664 | 0.826 | 0.723 | 0.586 | 0.780 | 0.717 |
| KNN | 57 | 0.920 | 0.696 | 0.670 | 0.829 | 0.720 | 0.581 | 0.779 | 0.716 |
| KNN | 58 | 0.920 | 0.708 | 0.672 | 0.806 | 0.723 | 0.588 | 0.776 | 0.718 |
| KNN | 59 | 0.937 | 0.712 | 0.674 | 0.804 | 0.726 | 0.590 | 0.782 | 0.722 |
| KNN | 60 | 0.920 | 0.702 | 0.672 | 0.813 | 0.722 | 0.585 | 0.777 | 0.717 |
| KNN | 61 | 0.916 | 0.685 | 0.662 | 0.806 | 0.710 | 0.568 | 0.767 | 0.705 |
| KNN | 62 | 0.908 | 0.692 | 0.662 | 0.791 | 0.711 | 0.570 | 0.763 | 0.706 |
| KNN | 63 | 0.904 | 0.698 | 0.671 | 0.814 | 0.719 | 0.580 | 0.772 | 0.714 |
| KNN | 64 | 0.916 | 0.695 | 0.665 | 0.817 | 0.716 | 0.575 | 0.773 | 0.711 |
| KNN | 65 | 0.912 | 0.690 | 0.663 | 0.813 | 0.713 | 0.572 | 0.770 | 0.708 |
| KNN | 66 | 0.908 | 0.698 | 0.666 | 0.804 | 0.716 | 0.577 | 0.769 | 0.711 |
| KNN | 67 | 0.893 | 0.690 | 0.654 | 0.804 | 0.707 | 0.565 | 0.760 | 0.701 |
| KNN | 68 | 0.916 | 0.688 | 0.659 | 0.816 | 0.712 | 0.570 | 0.770 | 0.706 |
| KNN | 69 | 0.929 | 0.699 | 0.662 | 0.814 | 0.717 | 0.577 | 0.776 | 0.713 |
| KNN | 70 | 0.912 | 0.694 | 0.665 | 0.801 | 0.714 | 0.573 | 0.768 | 0.709 |
| KNN | 71 | 0.916 | 0.687 | 0.665 | 0.812 | 0.712 | 0.570 | 0.770 | 0.707 |
| KNN | 72 | 0.916 | 0.683 | 0.658 | 0.807 | 0.707 | 0.561 | 0.766 | 0.702 |
| KNN | 73 | 0.924 | 0.694 | 0.669 | 0.799 | 0.716 | 0.575 | 0.772 | 0.712 |
| RF  | 1  | 0.765 | 0.476 | 0.476 | 0.336 | 0.479 | 0.250 | 0.513 | 0.484 |
| RF  | 2  | 0.826 | 0.628 | 0.539 | 0.527 | 0.599 | 0.420 | 0.630 | 0.594 |
| RF  | 3  | 0.891 | 0.674 | 0.573 | 0.635 | 0.650 | 0.486 | 0.693 | 0.643 |
| RF  | 4  | 0.877 | 0.706 | 0.634 | 0.676 | 0.689 | 0.544 | 0.723 | 0.685 |
| RF  | 5  | 0.907 | 0.736 | 0.666 | 0.727 | 0.723 | 0.591 | 0.759 | 0.718 |
| RF  | 6  | 0.907 | 0.729 | 0.659 | 0.764 | 0.722 | 0.590 | 0.765 | 0.716 |
| RF  | 7  | 0.911 | 0.741 | 0.669 | 0.779 | 0.733 | 0.609 | 0.775 | 0.726 |

|    |    |       |       |       |       |       |       |       |       |
|----|----|-------|-------|-------|-------|-------|-------|-------|-------|
| RF | 8  | 0.916 | 0.747 | 0.676 | 0.793 | 0.740 | 0.620 | 0.783 | 0.734 |
| RF | 9  | 0.912 | 0.751 | 0.675 | 0.830 | 0.745 | 0.627 | 0.792 | 0.738 |
| RF | 10 | 0.900 | 0.754 | 0.685 | 0.811 | 0.747 | 0.630 | 0.787 | 0.741 |
| RF | 11 | 0.912 | 0.749 | 0.667 | 0.811 | 0.740 | 0.622 | 0.785 | 0.732 |
| RF | 12 | 0.916 | 0.753 | 0.663 | 0.812 | 0.741 | 0.624 | 0.786 | 0.732 |
| RF | 13 | 0.907 | 0.750 | 0.666 | 0.824 | 0.741 | 0.625 | 0.787 | 0.733 |
| RF | 14 | 0.904 | 0.751 | 0.663 | 0.817 | 0.740 | 0.624 | 0.784 | 0.731 |
| RF | 15 | 0.912 | 0.750 | 0.667 | 0.817 | 0.741 | 0.624 | 0.787 | 0.734 |
| RF | 16 | 0.912 | 0.757 | 0.665 | 0.810 | 0.743 | 0.628 | 0.786 | 0.734 |
| RF | 17 | 0.912 | 0.756 | 0.668 | 0.809 | 0.743 | 0.626 | 0.786 | 0.735 |
| RF | 18 | 0.900 | 0.755 | 0.659 | 0.809 | 0.739 | 0.623 | 0.781 | 0.730 |
| RF | 19 | 0.908 | 0.748 | 0.657 | 0.833 | 0.739 | 0.623 | 0.786 | 0.729 |
| RF | 20 | 0.912 | 0.751 | 0.650 | 0.817 | 0.736 | 0.620 | 0.783 | 0.726 |
| RF | 21 | 0.912 | 0.758 | 0.669 | 0.830 | 0.747 | 0.635 | 0.792 | 0.739 |
| RF | 22 | 0.897 | 0.754 | 0.667 | 0.817 | 0.742 | 0.626 | 0.784 | 0.734 |
| RF | 23 | 0.912 | 0.758 | 0.672 | 0.828 | 0.748 | 0.635 | 0.793 | 0.740 |
| RF | 24 | 0.908 | 0.751 | 0.657 | 0.822 | 0.739 | 0.622 | 0.784 | 0.729 |
| RF | 25 | 0.916 | 0.758 | 0.664 | 0.832 | 0.747 | 0.636 | 0.793 | 0.737 |
| RF | 26 | 0.908 | 0.765 | 0.677 | 0.836 | 0.754 | 0.646 | 0.797 | 0.745 |
| RF | 27 | 0.920 | 0.758 | 0.678 | 0.835 | 0.752 | 0.640 | 0.798 | 0.744 |
| RF | 28 | 0.912 | 0.747 | 0.659 | 0.838 | 0.740 | 0.625 | 0.789 | 0.731 |
| RF | 29 | 0.912 | 0.758 | 0.673 | 0.835 | 0.749 | 0.638 | 0.795 | 0.741 |
| RF | 30 | 0.912 | 0.755 | 0.671 | 0.835 | 0.747 | 0.635 | 0.793 | 0.739 |
| RF | 31 | 0.916 | 0.752 | 0.660 | 0.831 | 0.742 | 0.629 | 0.790 | 0.733 |
| RF | 32 | 0.916 | 0.748 | 0.651 | 0.836 | 0.738 | 0.623 | 0.788 | 0.728 |

|    |    |       |       |       |       |       |       |       |       |
|----|----|-------|-------|-------|-------|-------|-------|-------|-------|
| RF | 33 | 0.912 | 0.751 | 0.667 | 0.836 | 0.744 | 0.632 | 0.792 | 0.736 |
| RF | 34 | 0.916 | 0.750 | 0.654 | 0.840 | 0.740 | 0.626 | 0.790 | 0.730 |
| RF | 35 | 0.908 | 0.756 | 0.657 | 0.835 | 0.743 | 0.632 | 0.789 | 0.733 |
| RF | 36 | 0.912 | 0.756 | 0.653 | 0.840 | 0.743 | 0.634 | 0.790 | 0.732 |
| RF | 37 | 0.912 | 0.752 | 0.656 | 0.835 | 0.741 | 0.628 | 0.789 | 0.732 |
| RF | 38 | 0.908 | 0.747 | 0.640 | 0.836 | 0.733 | 0.620 | 0.783 | 0.722 |
| RF | 39 | 0.916 | 0.756 | 0.656 | 0.836 | 0.744 | 0.633 | 0.791 | 0.733 |
| RF | 40 | 0.916 | 0.752 | 0.652 | 0.841 | 0.741 | 0.629 | 0.790 | 0.730 |
| RF | 41 | 0.916 | 0.754 | 0.642 | 0.829 | 0.738 | 0.628 | 0.785 | 0.726 |
| RF | 42 | 0.908 | 0.758 | 0.658 | 0.845 | 0.746 | 0.637 | 0.792 | 0.735 |
| RF | 43 | 0.912 | 0.752 | 0.650 | 0.837 | 0.740 | 0.629 | 0.788 | 0.729 |
| RF | 44 | 0.912 | 0.751 | 0.648 | 0.840 | 0.739 | 0.625 | 0.788 | 0.728 |
| RF | 45 | 0.920 | 0.754 | 0.653 | 0.834 | 0.741 | 0.630 | 0.790 | 0.731 |
| RF | 46 | 0.912 | 0.757 | 0.659 | 0.845 | 0.746 | 0.637 | 0.793 | 0.735 |
| RF | 47 | 0.912 | 0.750 | 0.645 | 0.837 | 0.737 | 0.625 | 0.786 | 0.726 |
| RF | 48 | 0.908 | 0.742 | 0.634 | 0.832 | 0.729 | 0.613 | 0.779 | 0.717 |
| RF | 49 | 0.920 | 0.742 | 0.636 | 0.840 | 0.731 | 0.615 | 0.785 | 0.720 |
| RF | 50 | 0.929 | 0.759 | 0.649 | 0.830 | 0.743 | 0.635 | 0.792 | 0.731 |
| RF | 51 | 0.908 | 0.745 | 0.634 | 0.826 | 0.730 | 0.614 | 0.779 | 0.718 |
| RF | 52 | 0.912 | 0.746 | 0.641 | 0.841 | 0.734 | 0.618 | 0.785 | 0.723 |
| RF | 53 | 0.912 | 0.745 | 0.647 | 0.842 | 0.736 | 0.620 | 0.787 | 0.725 |
| RF | 54 | 0.912 | 0.739 | 0.624 | 0.836 | 0.725 | 0.607 | 0.778 | 0.712 |
| RF | 55 | 0.916 | 0.750 | 0.645 | 0.843 | 0.738 | 0.624 | 0.789 | 0.727 |
| RF | 56 | 0.912 | 0.756 | 0.649 | 0.841 | 0.741 | 0.631 | 0.790 | 0.730 |
| RF | 57 | 0.916 | 0.738 | 0.635 | 0.840 | 0.728 | 0.608 | 0.783 | 0.718 |

|     |    |       |       |       |       |       |       |       |       |
|-----|----|-------|-------|-------|-------|-------|-------|-------|-------|
| RF  | 58 | 0.920 | 0.739 | 0.632 | 0.817 | 0.725 | 0.605 | 0.777 | 0.714 |
| RF  | 59 | 0.916 | 0.747 | 0.635 | 0.823 | 0.731 | 0.617 | 0.780 | 0.719 |
| RF  | 60 | 0.920 | 0.750 | 0.640 | 0.836 | 0.736 | 0.622 | 0.787 | 0.724 |
| RF  | 61 | 0.904 | 0.755 | 0.654 | 0.840 | 0.742 | 0.632 | 0.788 | 0.731 |
| RF  | 62 | 0.916 | 0.741 | 0.637 | 0.838 | 0.731 | 0.614 | 0.783 | 0.719 |
| RF  | 63 | 0.908 | 0.754 | 0.644 | 0.837 | 0.739 | 0.629 | 0.786 | 0.727 |
| RF  | 64 | 0.908 | 0.748 | 0.642 | 0.847 | 0.736 | 0.622 | 0.786 | 0.724 |
| RF  | 65 | 0.912 | 0.749 | 0.645 | 0.840 | 0.736 | 0.621 | 0.786 | 0.726 |
| RF  | 66 | 0.912 | 0.750 | 0.645 | 0.851 | 0.739 | 0.626 | 0.790 | 0.727 |
| RF  | 67 | 0.912 | 0.751 | 0.647 | 0.844 | 0.739 | 0.626 | 0.788 | 0.728 |
| RF  | 68 | 0.904 | 0.750 | 0.647 | 0.844 | 0.738 | 0.625 | 0.786 | 0.727 |
| RF  | 69 | 0.908 | 0.743 | 0.627 | 0.832 | 0.727 | 0.611 | 0.777 | 0.714 |
| RF  | 70 | 0.904 | 0.744 | 0.633 | 0.830 | 0.729 | 0.613 | 0.778 | 0.717 |
| RF  | 71 | 0.912 | 0.741 | 0.622 | 0.839 | 0.725 | 0.608 | 0.779 | 0.713 |
| RF  | 72 | 0.908 | 0.755 | 0.643 | 0.836 | 0.739 | 0.629 | 0.786 | 0.726 |
| RF  | 73 | 0.916 | 0.752 | 0.633 | 0.839 | 0.735 | 0.624 | 0.785 | 0.722 |
| SVM | 1  | 0.870 | 0.631 | 0.534 | 0.358 | 0.581 | 0.378 | 0.598 | 0.579 |
| SVM | 2  | 0.853 | 0.712 | 0.540 | 0.475 | 0.640 | 0.498 | 0.645 | 0.624 |
| SVM | 3  | 0.878 | 0.726 | 0.536 | 0.563 | 0.658 | 0.522 | 0.676 | 0.639 |
| SVM | 4  | 0.877 | 0.724 | 0.592 | 0.597 | 0.676 | 0.541 | 0.697 | 0.665 |
| SVM | 5  | 0.871 | 0.734 | 0.636 | 0.737 | 0.711 | 0.583 | 0.744 | 0.702 |
| SVM | 6  | 0.883 | 0.742 | 0.662 | 0.785 | 0.730 | 0.606 | 0.768 | 0.723 |
| SVM | 7  | 0.873 | 0.731 | 0.665 | 0.800 | 0.727 | 0.600 | 0.767 | 0.720 |
| SVM | 8  | 0.874 | 0.746 | 0.676 | 0.818 | 0.740 | 0.620 | 0.779 | 0.733 |
| SVM | 9  | 0.885 | 0.738 | 0.670 | 0.832 | 0.736 | 0.610 | 0.781 | 0.729 |

|     |    |       |       |       |       |       |       |       |       |
|-----|----|-------|-------|-------|-------|-------|-------|-------|-------|
| SVM | 10 | 0.881 | 0.727 | 0.671 | 0.831 | 0.731 | 0.600 | 0.778 | 0.725 |
| SVM | 11 | 0.885 | 0.710 | 0.663 | 0.835 | 0.722 | 0.586 | 0.774 | 0.716 |
| SVM | 12 | 0.881 | 0.715 | 0.663 | 0.829 | 0.723 | 0.588 | 0.772 | 0.717 |
| SVM | 13 | 0.874 | 0.711 | 0.664 | 0.840 | 0.722 | 0.586 | 0.772 | 0.716 |
| SVM | 14 | 0.893 | 0.718 | 0.665 | 0.829 | 0.725 | 0.592 | 0.776 | 0.720 |
| SVM | 15 | 0.893 | 0.706 | 0.660 | 0.842 | 0.720 | 0.584 | 0.775 | 0.714 |
| SVM | 16 | 0.900 | 0.740 | 0.708 | 0.836 | 0.752 | 0.631 | 0.796 | 0.748 |
| SVM | 17 | 0.893 | 0.737 | 0.722 | 0.846 | 0.757 | 0.635 | 0.800 | 0.754 |
| SVM | 18 | 0.889 | 0.732 | 0.709 | 0.847 | 0.749 | 0.623 | 0.794 | 0.746 |
| SVM | 19 | 0.885 | 0.730 | 0.710 | 0.872 | 0.751 | 0.625 | 0.799 | 0.748 |
| SVM | 20 | 0.878 | 0.730 | 0.712 | 0.866 | 0.751 | 0.625 | 0.797 | 0.748 |
| SVM | 21 | 0.885 | 0.723 | 0.713 | 0.853 | 0.747 | 0.618 | 0.794 | 0.744 |
| SVM | 22 | 0.874 | 0.733 | 0.716 | 0.850 | 0.752 | 0.627 | 0.793 | 0.748 |
| SVM | 23 | 0.897 | 0.739 | 0.718 | 0.846 | 0.756 | 0.633 | 0.800 | 0.753 |
| SVM | 24 | 0.897 | 0.739 | 0.721 | 0.849 | 0.757 | 0.635 | 0.801 | 0.754 |
| SVM | 25 | 0.889 | 0.731 | 0.719 | 0.850 | 0.753 | 0.629 | 0.797 | 0.750 |
| SVM | 26 | 0.893 | 0.729 | 0.719 | 0.860 | 0.754 | 0.629 | 0.800 | 0.751 |
| SVM | 27 | 0.889 | 0.730 | 0.718 | 0.851 | 0.752 | 0.627 | 0.797 | 0.749 |
| SVM | 28 | 0.889 | 0.732 | 0.718 | 0.848 | 0.753 | 0.629 | 0.797 | 0.750 |
| SVM | 29 | 0.893 | 0.735 | 0.719 | 0.857 | 0.756 | 0.634 | 0.801 | 0.753 |
| SVM | 30 | 0.893 | 0.742 | 0.725 | 0.861 | 0.762 | 0.643 | 0.805 | 0.758 |
| SVM | 31 | 0.893 | 0.741 | 0.721 | 0.861 | 0.760 | 0.639 | 0.804 | 0.756 |
| SVM | 32 | 0.904 | 0.724 | 0.717 | 0.857 | 0.752 | 0.625 | 0.801 | 0.748 |
| SVM | 33 | 0.900 | 0.722 | 0.714 | 0.854 | 0.749 | 0.621 | 0.798 | 0.745 |
| SVM | 34 | 0.908 | 0.708 | 0.699 | 0.854 | 0.738 | 0.604 | 0.792 | 0.734 |

|     |    |       |       |       |       |       |       |       |       |
|-----|----|-------|-------|-------|-------|-------|-------|-------|-------|
| SVM | 35 | 0.908 | 0.710 | 0.700 | 0.851 | 0.739 | 0.605 | 0.792 | 0.735 |
| SVM | 36 | 0.912 | 0.721 | 0.710 | 0.863 | 0.749 | 0.621 | 0.802 | 0.745 |
| SVM | 37 | 0.904 | 0.698 | 0.692 | 0.868 | 0.733 | 0.597 | 0.791 | 0.729 |
| SVM | 38 | 0.904 | 0.703 | 0.695 | 0.865 | 0.736 | 0.601 | 0.792 | 0.732 |
| SVM | 39 | 0.897 | 0.712 | 0.703 | 0.863 | 0.741 | 0.610 | 0.794 | 0.738 |
| SVM | 40 | 0.897 | 0.710 | 0.702 | 0.866 | 0.741 | 0.609 | 0.794 | 0.737 |
| SVM | 41 | 0.897 | 0.712 | 0.700 | 0.866 | 0.741 | 0.610 | 0.794 | 0.737 |
| SVM | 42 | 0.897 | 0.712 | 0.700 | 0.866 | 0.741 | 0.610 | 0.794 | 0.737 |
| SVM | 43 | 0.897 | 0.710 | 0.696 | 0.863 | 0.738 | 0.605 | 0.791 | 0.734 |
| SVM | 44 | 0.904 | 0.722 | 0.712 | 0.868 | 0.750 | 0.623 | 0.802 | 0.747 |
| SVM | 45 | 0.897 | 0.719 | 0.704 | 0.836 | 0.741 | 0.610 | 0.789 | 0.738 |
| SVM | 46 | 0.900 | 0.727 | 0.706 | 0.829 | 0.745 | 0.616 | 0.791 | 0.742 |
| SVM | 47 | 0.893 | 0.722 | 0.711 | 0.847 | 0.747 | 0.618 | 0.793 | 0.743 |
| SVM | 48 | 0.904 | 0.709 | 0.702 | 0.855 | 0.739 | 0.605 | 0.793 | 0.736 |
| SVM | 49 | 0.904 | 0.710 | 0.703 | 0.855 | 0.740 | 0.606 | 0.793 | 0.737 |
| SVM | 50 | 0.900 | 0.701 | 0.689 | 0.839 | 0.729 | 0.591 | 0.783 | 0.725 |
| SVM | 51 | 0.900 | 0.707 | 0.702 | 0.852 | 0.738 | 0.604 | 0.790 | 0.734 |
| SVM | 52 | 0.912 | 0.716 | 0.704 | 0.852 | 0.743 | 0.611 | 0.796 | 0.739 |
| SVM | 53 | 0.908 | 0.705 | 0.693 | 0.853 | 0.734 | 0.598 | 0.790 | 0.730 |
| SVM | 54 | 0.908 | 0.712 | 0.697 | 0.853 | 0.739 | 0.605 | 0.792 | 0.735 |
| SVM | 55 | 0.908 | 0.714 | 0.699 | 0.855 | 0.741 | 0.608 | 0.794 | 0.737 |
| SVM | 56 | 0.908 | 0.700 | 0.691 | 0.850 | 0.731 | 0.594 | 0.787 | 0.727 |
| SVM | 57 | 0.916 | 0.708 | 0.696 | 0.854 | 0.737 | 0.602 | 0.794 | 0.734 |
| SVM | 58 | 0.920 | 0.724 | 0.712 | 0.856 | 0.750 | 0.622 | 0.803 | 0.747 |
| SVM | 59 | 0.920 | 0.722 | 0.713 | 0.856 | 0.750 | 0.621 | 0.803 | 0.747 |

|     |    |       |       |       |       |       |       |       |       |
|-----|----|-------|-------|-------|-------|-------|-------|-------|-------|
| SVM | 60 | 0.920 | 0.721 | 0.711 | 0.856 | 0.749 | 0.619 | 0.802 | 0.746 |
| SVM | 61 | 0.920 | 0.703 | 0.695 | 0.848 | 0.734 | 0.597 | 0.792 | 0.731 |
| SVM | 62 | 0.912 | 0.702 | 0.693 | 0.851 | 0.733 | 0.595 | 0.789 | 0.729 |
| SVM | 63 | 0.920 | 0.700 | 0.691 | 0.857 | 0.733 | 0.595 | 0.792 | 0.729 |
| SVM | 64 | 0.924 | 0.710 | 0.692 | 0.850 | 0.736 | 0.602 | 0.794 | 0.733 |
| SVM | 65 | 0.924 | 0.713 | 0.699 | 0.853 | 0.741 | 0.608 | 0.797 | 0.737 |
| SVM | 66 | 0.924 | 0.713 | 0.699 | 0.853 | 0.741 | 0.608 | 0.797 | 0.737 |
| SVM | 67 | 0.924 | 0.712 | 0.701 | 0.863 | 0.742 | 0.610 | 0.800 | 0.739 |
| SVM | 68 | 0.929 | 0.716 | 0.708 | 0.858 | 0.747 | 0.616 | 0.803 | 0.743 |
| SVM | 69 | 0.920 | 0.705 | 0.698 | 0.854 | 0.737 | 0.602 | 0.794 | 0.734 |
| SVM | 70 | 0.920 | 0.704 | 0.694 | 0.854 | 0.735 | 0.599 | 0.793 | 0.731 |
| SVM | 71 | 0.920 | 0.694 | 0.683 | 0.859 | 0.728 | 0.589 | 0.789 | 0.724 |
| SVM | 72 | 0.924 | 0.702 | 0.688 | 0.856 | 0.733 | 0.596 | 0.793 | 0.729 |
| SVM | 73 | 0.924 | 0.707 | 0.694 | 0.859 | 0.737 | 0.603 | 0.796 | 0.733 |
