# Supplementary material for: Changes in Antigen-Reactive Antibody Level at Various Time Spans after COVID-19 Vaccination Using Machine Learning
Source: Preprints.org preprint supplement (doi:10.20944/preprints202304.1091.v1), 2023-04-28
Supplement: Supplementary file 4 [file supplementary]

**Table S4.** Results of the intersection of top 20 features identified by LASSO, LightGBM, MCFS, and mRMR methods for each class.

(1) Unvaccinated healthcare workers

| Features identified by one method | Features identified by two methods | Features identified by three methods | Features identified by four methods |
|-----------------------------------|------------------------------------|--------------------------------------|-------------------------------------|
| HuIgA_0.30                        | hCoV.HKU1.NP                       | HuIgM_0.30                           | SARS.CoV.2.S1.RBD.mFc               |
| MoIgG_0.03                        | SARS.CoV.NP                        | SARS.CoV.2.S1.mFcTag                 | SARS.CoV.S1.HisTag                  |
| a-HuIgM_0.03                      | hCoV.OC43.HE                       | SARS.CoV.2.Spike.RBD.rFc             | a-HuIgG_0.03                        |
| MoIgA_0.10                        | MERS.CoV.S1.RBD.367.606.rFcTag     | SARS.CoV.S1.RBD.HisTag               | SARS.CoV.2.Spike.RBD.His.Bac        |
| a-MoIgG_0.03                      | Flu.B_Mal/.HA1                     | SARS.CoV.2.S1.HisTag                 | SARS.CoV.2.S1+S2                    |
| Flu.H3N2.HA1+HA2                  | SARS.CoV.2.S1                      | hCoV.NL63.S1_S2                      |                                     |
| hCoV.OC43.NP                      | a-HuIgG_0.10                       |                                      |                                     |
| MERS.CoV.NP                       | HuIgG_0.03                         |                                      |                                     |
| HuIgA_0.03                        | SARS.CoV.S1.RBD.rFcTag             |                                      |                                     |
| HuIgM_0.10                        |                                    |                                      |                                     |
| Flu.H3N2.HA1                      |                                    |                                      |                                     |
| a-MoIgA_0.03                      |                                    |                                      |                                     |
| hCoV.HKU1.S1_S2                   |                                    |                                      |                                     |
| hCoV.229E.S1                      |                                    |                                      |                                     |
| hCoV.HKU1.S1_AA1.760              |                                    |                                      |                                     |
| Flu.H1N1.HA1+HA2                  |                                    |                                      |                                     |
| MERS.CoV.S1.ECD.1-1297.HisTag     |                                    |                                      |                                     |
| hCoV.NL63.S1                      |                                    |                                      |                                     |
| SARS.CoV.2.Spike.RBD.His.HEK      |                                    |                                      |                                     |

|                    |  |  |  |
|--------------------|--|--|--|
| SARS.CoV.2.S2      |  |  |  |
| HuIgG_0.10         |  |  |  |
| Flu.B_Phu/.HA1+HA2 |  |  |  |
| HuIgG_0.30         |  |  |  |
| a-MoIgA_0.30       |  |  |  |

(2) Healthcare workers within 60 days after vaccination

| Features identified by one method | Features identified by two methods | Features identified by three methods | Features identified by four methods |
|-----------------------------------|------------------------------------|--------------------------------------|-------------------------------------|
| MoIgG_0.03                        | hCoV.NL63.S1_S2                    | MERS.CoV.S1.RBD.367.606.rFcTag       | SARS.CoV.2.S1.mFcTag                |
| MoIgA_0.10                        | hCoV.229E.S1                       | a-HuIgG_0.03                         | HuIgM_0.30                          |
| a-HuIgM_0.03                      | SARS.CoV.2.Spike.RBD.His.Bac       | HuIgG_0.10                           |                                     |
| a-MoIgG_0.03                      | SARS.CoV.NP                        | SARS.CoV.2.S2                        |                                     |
| HuIgA_0.30                        | a-HuIgG_0.30                       | HuIgG_0.03                           |                                     |
| SARS.CoV.S1.RBD.rFcTag            | a-MoIgG_0.30                       | Flu.B_Phu/.HA1+HA2                   |                                     |
| a-MoIgA_0.03                      | SARS.CoV.2.Spike.RBD.His.HEK       | hCoV.HKU1.NP                         |                                     |
| MoIgG_0.30                        | Flu.H3N2.HA1+HA2                   | a-HuIgG_0.10                         |                                     |
| HuIgM_0.10                        | HuIgG_0.30                         |                                      |                                     |
| HuIgM_0.03                        | SARS.CoV.2.S1                      |                                      |                                     |
| Flu.B_Mal/.HA1                    | SARS.CoV.2.S1+S2                   |                                      |                                     |
| hCoV.HKU1.S1_AA1.760              | a-MoIgG_0.10                       |                                      |                                     |
| Flu.H1N1.HA1+HA2                  |                                    |                                      |                                     |
| SARS.CoV.2.Spike.RBD.rFc          |                                    |                                      |                                     |
| hCoV.OC43.HE                      |                                    |                                      |                                     |
| SARS.CoV.S1.HisTag                |                                    |                                      |                                     |

|                               |  |  |  |
|-------------------------------|--|--|--|
| SARS.CoV.2.S1.RBD.mFc         |  |  |  |
| SARS.CoV.S1.RBD.HisTag        |  |  |  |
| Flu.B_Phu/.HA1                |  |  |  |
| hCoV.NL63.S1                  |  |  |  |
| MERS.CoV.S1.ECD.1-1297.HisTag |  |  |  |
| a-MoIgA_0.30                  |  |  |  |
| SARS.CoV.2.S1.HisTag          |  |  |  |
| Flu.H1N1.HA1                  |  |  |  |

(3) Healthcare workers 60–180 days after vaccination

| Features identified by one method | Features identified by two methods | Features identified by three methods | Features identified by four methods |
|-----------------------------------|------------------------------------|--------------------------------------|-------------------------------------|
| MoIgA_0.10                        | a-MoIgG_0.03                       | MERS.CoV.S1.RBD.367.606.rFcTag       | SARS.CoV.2.S1.mFcTag                |
| a-HuIgM_0.03                      | hCoV.NL63.S1_S2                    | SARS.CoV.2.S1+S2                     | HuIgM_0.30                          |
| HuIgA_0.30                        | SARS.CoV.NP                        | SARS.CoV.2.Spike.RBD.rFc             | SARS.CoV.2.S1.RBD.mFc               |
| hCoV.HKU1.NP                      | a-HuIgG_0.03                       | a-HuIgG_0.30                         |                                     |
| a-MoIgG_0.30                      | hCoV.OC43.HE                       | HuIgG_0.10                           |                                     |
| SARS.CoV.S1.RBD.rFcTag            | SARS.CoV.S1.HisTag                 |                                      |                                     |
| MERS.CoV.NP                       | Flu.B_Mal/.HA1                     |                                      |                                     |
| MoIgG_0.30                        | MoIgG_0.03                         |                                      |                                     |
| a-MoIgA_0.03                      | Flu.H3N2.HA1+HA2                   |                                      |                                     |
| SARS.CoV.S1.RBD.HisTag            | Flu.B_Phu/.HA1+HA2                 |                                      |                                     |
| Flu.B_Phu/.HA1                    | HuIgG_0.30                         |                                      |                                     |

|                               |                              |  |  |
|-------------------------------|------------------------------|--|--|
| MERS.CoV.S1.ECD.1-1297.HisTag | SARS.CoV.2.S1.HisTag         |  |  |
| hCoV.NL63.S1                  | SARS.CoV.2.S1                |  |  |
| Flu.H1N1.HA1+HA2              | SARS.CoV.2.Spike.RBD.His.Bac |  |  |
| hCoV.229E.S1                  | HuIgG_0.03                   |  |  |
| hCoV.HKU1.S1_AA1.760          | HuIgM_0.10                   |  |  |
| a-MoIgA_0.30                  | HuIgM_0.03                   |  |  |
| a-HuIgG_0.10                  |                              |  |  |
| SARS.CoV.2.Spike.RBD.His.HEK  |                              |  |  |

(4) Healthcare workers over 180 days after vaccination

| Features identified by one method | Features identified by two methods | Features identified by three methods | Features identified by four methods |
|-----------------------------------|------------------------------------|--------------------------------------|-------------------------------------|
| a-HuIgM_0.03                      | Flu.B_Phu/.HA1+HA2                 | HuIgM_0.30                           | MERS.CoV.S1.RBD.367.606.rFcTag      |
| HuIgA_0.30                        | SARS.CoV.2.S1.mFcTag               | Flu.H1N1.HA1+HA2                     | Flu.B_Mal/.HA1                      |
| MoIgA_0.10                        | SARS.CoV.S1.HisTag                 | hCoV.229E.S1                         | a-HuIgG_0.03                        |
| a-MoIgG_0.30                      | SARS.CoV.2.S1+S2                   | hCoV.NL63.S1_S2                      |                                     |
| Flu.H3N2.HA1+HA2                  | HuIgM_0.03                         | hCoV.HKU1.NP                         |                                     |
| SARS.CoV.2.S2                     | HuIgM_0.10                         | MoIgG_0.03                           |                                     |
| a-HuIgG_0.10                      | HuIgA_0.03                         | a-MoIgG_0.03                         |                                     |
| a-MoIgG_0.10                      | a-MoIgA_0.03                       | HuIgG_0.03                           |                                     |
| SARS.CoV.2.S1                     | MERS.CoV.NP                        |                                      |                                     |
| SARS.CoV.2.S1.HisTag              | a-HuIgG_0.30                       |                                      |                                     |
| hCoV.NL63.S1                      | Flu.B_Mal/.HA1+HA2                 |                                      |                                     |

|                                   |  |  |  |
|-----------------------------------|--|--|--|
| MERS.CoV.S1.ECD.1-<br>1297.HisTag |  |  |  |
| Flu.B_Phu/.HA1                    |  |  |  |
| SARS.CoV.2.Spike.RBD.His.Bac      |  |  |  |
| SARS.CoV.NP                       |  |  |  |
| SARS.CoV.S1.RBD.HisTag            |  |  |  |
| hCoV.OC43.HE                      |  |  |  |
| hCoV.HKU1.S1_AA1.760              |  |  |  |
| SARS.CoV.2.Spike.RBD.rFc          |  |  |  |
| Flu.H1N1.HA1                      |  |  |  |
| HuIgG_0.10                        |  |  |  |
| HuIgG_0.30                        |  |  |  |
