# Supplementary material for: Changes in Antigen-Reactive Antibody Level at Various Time Spans after COVID-19 Vaccination Using Machine Learning
Source: Preprints.org preprint supplement (doi:10.20944/preprints202304.1091.v1), 2023-04-28
Supplement: Supplementary file 5 [file supplementary]

**Table S1.** Feature lists obtained by LASSO, LightGBM, MCFS, and mRMR methods.

| Rank | LASSO feature list             | LightGBM feature list          | MCFS feature list            | mRMR feature list        |
|------|--------------------------------|--------------------------------|------------------------------|--------------------------|
| 1    | SARS.CoV.2.S1.mFcTag           | HuIgG_0.03                     | SARS.CoV.2.S1.mFcTag         | SARS.CoV.2.S1.RBD.mFc    |
| 2    | a-HuIgG_0.03                   | SARS.CoV.2.Spike.RBD.His.Bac   | SARS.CoV.2.S1.RBD.mFc        | HuIgG_0.10               |
| 3    | hCoV.229E.S1                   | HuIgG_0.10                     | SARS.CoV.2.S1.HisTag         | SARS.CoV.2.S2            |
| 4    | MERS.CoV.S1.RBD.367.606.rFcTag | a-HuIgG_0.10                   | SARS.CoV.2.Spike.RBD.His.Bac | SARS.CoV.2.S1.mFcTag     |
| 5    | Flu.B_Mal/.HA1                 | a-HuIgG_0.30                   | SARS.CoV.2.Spike.RBD.His.HEK | a-HuIgG_0.30             |
| 6    | hCoV.NL63.S1                   | MERS.CoV.S1.RBD.367.606.rFcTag | SARS.CoV.2.Spike.RBD.rFc     | HuIgG_0.03               |
| 7    | Flu.H1N1.HA1+HA2               | HuIgM_0.10                     | SARS.CoV.2.S1                | SARS.CoV.S1.HisTag       |
| 8    | SARS.CoV.2.Spike.RBD.rFc       | a-HuIgG_0.03                   | SARS.CoV.2.S1+S2             | hCoV.NL63.S1_S2          |
| 9    | hCoV.HKU1.S1_AA1.760           | HuIgM_0.30                     | HuIgG_0.03                   | a-HuIgG_0.03             |
| 10   | SARS.CoV.2.Spike.RBD.His.Bac   | Flu.B_Mal/.HA1                 | HuIgG_0.10                   | SARS.CoV.2.Spike.RBD.rFc |
| 11   | hCoV.OC43.HE                   | Flu.H1N1.HA1+HA2               | SARS.CoV.S1.RBD.HisTag       | hCoV.HKU1.NP             |
| 12   | Flu.B_Phu/.HA1                 | hCoV.HKU1.NP                   | a-HuIgG_0.30                 | Flu.B_Phu/.HA1+HA2       |

|    |                               |                        |                    |                                |
|----|-------------------------------|------------------------|--------------------|--------------------------------|
| 13 | MERS.CoV.S1.ECD.1-1297.HisTag | a-MoIgG_0.03           | HuIgG_0.30         | SARS.CoV.2.S1+S2               |
| 14 | HuIgM_0.30                    | hCoV.NL63.S1_S2        | a-HuIgG_0.10       | MoIgA_0.10                     |
| 15 | SARS.CoV.S1.HisTag            | HuIgM_0.03             | a-HuIgG_0.03       | HuIgG_0.30                     |
| 16 | SARS.CoV.2.S1                 | MERS.CoV.NP            | SARS.CoV.S1.HisTag | SARS.CoV.2.Spike.RBD.His.Bac   |
| 17 | SARS.CoV.2.S1.HisTag          | SARS.CoV.S1.RBD.rFcTag | a-MoIgG_0.10       | HuIgA_0.30                     |
| 18 | SARS.CoV.2.S1.RBD.mFc         | SARS.CoV.2.S1+S2       | HuIgM_0.10         | a-MoIgG_0.30                   |
| 19 | SARS.CoV.2.S1+S2              | SARS.CoV.S1.HisTag     | Flu.B_Phu/.HA1+HA2 | Flu.B_Mal/.HA1                 |
| 20 | SARS.CoV.NP                   | Flu.B_Phu/.HA1+HA2     | hCoV.HKU1.NP       | SARS.CoV.S1.RBD.HisTag         |
| 21 | SARS.CoV.S1.RBD.HisTag        | MoIgG_0.03             | SARS.CoV.2.S2      | MERS.CoV.S1.RBD.367.606.rFcTag |
| 22 | DcCoV.HKU23.NP                | SARS.CoV.2.S1.mFcTag   | HuIgM_0.03         | Flu.H3N2.HA1+HA2               |
| 23 | hCoV.HKU1.S1_S2               | Flu.B_Mal/.HA1+HA2     | a-MoIgA_0.30       | SARS.CoV.2.S1.HisTag           |
| 24 | hCoV.NL63.NP                  | hCoV.OC43.NP           | Flu.B_Mal/.HA1     | HuIgM_0.30                     |
| 25 | hCoV.OC43.S1_S2ECD.HisTag     | a-MoIgA_0.03           | hCoV.NL63.S1_S2    | a-HuIgG_0.10                   |
| 26 | Flu.B_Mal/.HA1+HA2            | Flu.H3N2.HA1           | MoIgG_0.03         | MoIgG_0.03                     |

|    |              |                           |                                        |                                   |
|----|--------------|---------------------------|----------------------------------------|-----------------------------------|
| 27 | Flu.H1N1.HA1 | HuIgA_0.03                | Flu.H1N1.HA1                           | SARS.CoV.2.S1                     |
| 28 | a-HuIgA_0.30 | a-MoIgG_0.10              | a-MoIgG_0.30                           | a-HuIgM_0.03                      |
| 29 | a-HuIgA_0.10 | SARS.CoV.2.S1.RBD.m<br>Fc | Flu.H3N2.HA1+H<br>A2                   | a-MoIgG_0.03                      |
| 30 | a-HuIgA_0.03 | SARS.CoV.2.S2             | MERS.CoV.NP                            | SARS.CoV.2.Spike.<br>RBD.His.HEK  |
| 31 | a-HuIgG_0.30 | hCoV.229E.S1              | SARS.CoV.S1.RB<br>D.rFcTag             | HuIgM_0.03                        |
| 32 | a-HuIgG_0.10 | SARS.CoV.NP               | Flu.H1N1.HA1+H<br>A2                   | MERS.CoV.S1.EC<br>D.1-1297.HisTag |
| 33 | a-HuIgM_0.30 | hCoV.HKU1.S1_S2           | Flu.B_Mal/.HA1+<br>HA2                 | HuIgM_0.10                        |
| 34 | a-HuIgM_0.10 | hCoV.OC43.HE              | HuIgA_0.03                             | hCoV.NL63.NP                      |
| 35 | a-HuIgM_0.03 | MoIgG_0.30                | HuIgM_0.30                             | HuIgA_0.03                        |
| 36 | a-MoIgA_0.30 | hCoV.229E.S1_S2           | a-MoIgA_0.03                           | hCoV.HKU1.S1_A<br>A1.760          |
| 37 | a-MoIgA_0.10 | HuIgG_0.30                | MERS.CoV.S1.R<br>BD.367.606.rFcTa<br>g | Flu.H1N1.HA1+HA<br>2              |
| 38 | a-MoIgA_0.03 | a-MoIgA_0.30              | a-MoIgG_0.03                           | a-MoIgA_0.03                      |
| 39 | a-MoIgG_0.10 | Flu.H3N2.HA1+HA2          | hCoV.229E.S1                           | Flu.H3N2.HA1                      |
| 40 | a-MoIgM_0.30 | hCoV.HKU1.S1_AA1.7<br>60  | a-HuIgA_0.03                           | a-MoIgA_0.10                      |

|    |              |                                   |                                   |                            |
|----|--------------|-----------------------------------|-----------------------------------|----------------------------|
| 41 | a-MoIgM_0.10 | a-HuIgM_0.03                      | hCoV.HKU1.S1_S<br>2               | a-MoIgM_0.03               |
| 42 | a-MoIgM_0.03 | HuIgA_0.30                        | hCoV.HKU1.S1_<br>AA1.760          | HuIgA_0.10                 |
| 43 | HuIgA_0.10   | Flu.H1N1.HA1                      | a-MoIgA_0.10                      | hCoV.OC43.NP               |
| 44 | HuIgA_0.03   | hCoV.NL63.S1                      | Flu.H3N2.HA1                      | SARS.CoV.S1.RB<br>D.rFcTag |
| 45 | HuIgG_0.03   | a-HuIgA_0.03                      | hCoV.OC43.S1_S<br>2ECD.HisTag     | hCoV.OC43.HE               |
| 46 | HuIgM_0.03   | hCoV.OC43.S1_S2ECD.<br>HisTag     | SARS.CoV.NP                       | MoIgM_0.03 -<br>0.00221    |
| 47 | MoIgA_0.30   | a-MoIgA_0.10                      | MERS.CoV.S1.E<br>CD.1-1297.HisTag | hCoV.HKU1.S1_S2            |
| 48 | MoIgA_0.03   | MERS.CoV.S1.ECD.1-<br>1297.HisTag | a-MoIgM_0.30                      | SARS.CoV.2.NP              |
| 49 | MoIgG_0.30   | SARS.CoV.2.NP                     | Flu.B_Phu/.HA1                    | a-HuIgA_0.03               |
| 50 | MoIgG_0.10   | DcCoV.HKU23.NP                    | SARS.CoV.2.NP                     | Flu.B_Mal/.HA1+H<br>A2     |
| 51 | MoIgM_0.30   | SARS.CoV.2.S1                     | hCoV.NL63.NP                      | MERS.CoV.NP                |
| 52 | MoIgM_0.10   | MoIgA_0.03                        | hCoV.OC43.HE                      | hCoV.229E.S1               |
| 53 | MoIgM_0.03   | HuIgA_0.10                        | MoIgG_0.30                        | a-MoIgG_0.10               |
| 54 | MoIgG_0.03   | MoIgA_0.10                        | hCoV.OC43.NP                      | MoIgA_0.03                 |

|    |                                  |                                  |                    |                               |
|----|----------------------------------|----------------------------------|--------------------|-------------------------------|
| 55 | hCoV.OC43.NP                     | Flu.B_Phu/.HA1                   | HuIgA_0.30         | MoIgG_0.10                    |
| 56 | MoIgA_0.10                       | hCoV.NL63.NP                     | hCoV.NL63.S1       | a-MoIgA_0.30                  |
| 57 | HuIgA_0.30                       | SARS.CoV.2.Spike.RB<br>D.rFc     | a-MoIgM_0.03       | hCoV.OC43.S1_S2<br>ECD.HisTag |
| 58 | HuIgM_0.10                       | SARS.CoV.2.S1.HisTag             | a-MoIgM_0.10       | MoIgM_0.10                    |
| 59 | a-MoIgG_0.30                     | MoIgG_0.10                       | hCoV.229E.S1_S2    | MoIgG_0.30                    |
| 60 | SARS.CoV.2.NP                    | a-MoIgM_0.03                     | MoIgG_0.10         | a-HuIgM_0.10                  |
| 61 | Flu.H3N2.HA1                     | MoIgM_0.10                       | a-HuIgM_0.03       | DcCoV.HKU23.NP                |
| 62 | MERS.CoV.NP                      | SARS.CoV.2.Spike.RB<br>D.His.HEK | a-HuIgM_0.30       | hCoV.NL63.S1                  |
| 63 | HuIgG_0.30                       | MoIgM_0.30                       | HuIgA_0.10         | SARS.CoV.NP                   |
| 64 | hCoV.HKU1.NP                     | MoIgM_0.03                       | MoIgM_0.03         | MoIgA_0.30                    |
| 65 | a-MoIgG_0.03                     | SARS.CoV.S1.RBD.His<br>Tag       | MoIgA_0.03         | a-MoIgM_0.10                  |
| 66 | SARS.CoV.2.Spike.R<br>BD.His.HEK | MoIgA_0.30                       | DcCoV.HKU23.N<br>P | a-HuIgA_0.10                  |
| 67 | SARS.CoV.2.S2                    | a-HuIgM_0.10                     | a-HuIgA_0.30       | Flu.H1N1.HA1                  |
| 68 | SARS.CoV.S1.RBD.r<br>FcTag       | a-HuIgA_0.10                     | MoIgM_0.10         | MoIgM_0.30                    |

|    |                        |              |              |                 |
|----|------------------------|--------------|--------------|-----------------|
| 69 | Flu.H3N2.HA1+HA2       | a-HuIgA_0.30 | MoIgM_0.30   | Flu.B_Phu/.HA1  |
| 70 | Flu.B_Phu/.HA1+HA<br>2 | a-MoIgG_0.30 | a-HuIgA_0.10 | a-HuIgM_0.30    |
| 71 | hCoV.NL63.S1_S2        | a-MoIgM_0.30 | a-HuIgM_0.10 | hCoV.229E.S1_S2 |
| 72 | hCoV.229E.S1_S2        | a-HuIgM_0.30 | MoIgA_0.10   | a-HuIgA_0.30    |
| 73 | HuIgG_0.10             | a-MoIgM_0.10 | MoIgA_0.30   | a-MoIgM_0.30    |
